# Supplementary material for: A systems-level approach to parental genomic imprinting: the imprinted gene network includes extracellular matrix genes and regulates cell cycle exit and differentiation
Source: HighWire-hosted journal article supplement (doi:10.1101/gr.175919.114), 2015-01-22
Supplement: Supplemental_Information.docx [file Supplemental_Information.docx]

**Supplemental Methods and Results**

Construction of the network of murine imprinted genes

We searched COXPRESdb for murine IG data and retrieved the genes co-expressed with each of the 85 IGs present in this database. We then filtered these lists for co-expression links that involve 2 IGs with a mutual rank below 1,200. The setting of this arbitrary cut-off was based on the following considerations. First, a cut-off had to be set to use the data in COXPRESdb. The measurement of gene co-expression relied on the computation of the Pearson's correlation coefficient (PCC) for each pair of genes. However, the optimal PCC threshold to retrieve functionally related genes is affected by the method of database construction and the target gene function (Obayashi and Kinoshita 2009). To overcome this problem, Kinoshita and co-workers showed that the mutual rank is a good solution. The mutual rank of genes A and B is the geometric average of the rank of B in the PCC-ranked list of genes co-expressed with A and the rank of A in the PCC-ranked list of genes co-expressed with B. However, the result of this process is that every single gene is co-expressed with every other gene. This is of course of little practical value if no cut-off is introduced to determine which co-expression links are “significant” and which are not. We let the cut-off (MRmax) vary from 250 to 2,000 and replicated Figure 1B with IGs, 50 sets of 85 genes from GO_BPs (Table S22; see below for GO_BP selection), and 1,000 sets of 85 randomly drawn genes (Figure S15). We then plotted the values of 3 topological parameters that characterized the resulting networks, i.e. the size of the largest connected component, the average node degree and the average edge weight (MR), as a function of MRmax (Figure S16). The size of the largest connected component induced by IGs was significantly different from the ones induced by sets of randomly drawn genes for MRmax=250, 500, 1200 (p<0.0209), and 1250 (Table S23). The average degree and average MR of the network induced by IGs were significantly different from those of networks induced by sets of randomly drawn genes whatever MRmax value was used (Table S23). We therefore had to set the cut-off arbitrarily. We selected 1200 because genes with MR=1,200 were on average the 1,052th gene in co-expression lists found in COXPRESdb, which corresponded to the 5th percentile of co-expressed genes (21,036 x 0.05=1,051.8), and 5% is a commonly used arbitrary cut-off in statistics. The general conclusion from data displayed in Figures S14 and S15 was that the cut-off we used (MRmax=1,200) resulted in a network of connected genes that contained only slightly, but significantly, more genes than expected by chance. In addition, both the weight of the links between the genes and the number of first neighbors of the genes in this network were very significantly higher than expected by chance.

To further support the specificity of the network induced by IGs in COXPRESdb, we tested whether it displayed average MR and average degree similar to those of networks made of randomly drawn, connected genes. We randomly draw sets of 85 genes and measured the size of the corresponding LCC until we accumulated 1,000 sets whose LCC size was 84. We then computed the empirical cumulative density function of the average edge weight and average node degree. We computed the p-values for the values we observed with 85 IGs, *i.e.* average MR=535.7 and average node degree=4.0. The p-values were 0.003 and 0, respectively, indicating that the network induced by murine IGs in COXPRESdb is significantly more densely and heavily connected than networks of connected genes of the same size.

For Gemma, we had not to threshold co-expression measurements because this was done during the construction of the database; a PCC is calculated for each experiment, and only co-expression with a PCC ≥ 0.7 are considered significant. The positive support is the number of independent experiments in which the PCC between 2 given genes is ≥ 0.7.

We focused on GO_BPs comprising at least 85 genes with data in COXPRESdb so that we compared only sets of exactly 85 genes. To select the 50 GO_BPs used in this study, we ranked GO_BPs according to the number of genes with data in COXPRESdb they comprised and took the 50 with the lowest number of genes and at least 85 genes. For those GO_BPs comprising more than 85 genes with data in COXPRESdb, we selected the 85 first genes in the list. Table S22 lists the 50 GO_BPs that we used including the total number of annotated genes and the number of annotated genes with data in COXPRESdb.

Analysis of DNA methylation using McrBC

Genomic DNAs were extracted from proliferating (day 3) and quiescent (day 7) JB6 and BJ1 embryonic fibroblasts using the PureLink® Genomic DNA kit (Life Technologies). DNA methylation was quantitatively evaluated using the methylation-dependent restriction enzyme McrBC (Oakes et al. 2006). Briefly, 200 ng of genomic DNA was digested in the presence of GTP for 16 hours at 37°C by McrBC that cuts methylated cytosine in the following context: 5'-PumC(N)40-2000PumC-3'. Real-time PCR was performed in triplicate on undigested and digested genomic DNA with Roche's LightCycler 480, LC480 SYBR Green I Master reagent and primers described in Table S18. 2-DCp values were obtained by normalizing to 3 CpG-free loci, *i.e. Col1a2*, *Col3a1*, and *Col9a2* (Table S18). Finally the percentage of methylated DNA at each locus was calculated according to the following formula:

% methylated DNA= 100 x (1- (2-DCp(digested DNA) / 2-DCp(undigested DNA))).

Measurement of apoptosis

3T3-L1 cells were transfected as indicated in the Methods section with plasmids encoding truncated rat CD2 as a transfection reporter and one of the plasmids encoding *CAT* (chloramphenicol acetyl transferase), *Trp53*, or IGs, and were seeded at 10,000 cells/cm². Forty-eight hours latter, the cells were harvested and stained with an FITC anti-rat CD2 antibody (BD Pahrmingen; clone OX-34) and apoptosis was determined using the PE Annexin V Apoptosis Detection Kit I (BD Biosciences) according to the manufacturer's instructions.

Construction of the imprinted gene network (IGN)

To identify bi-allelically expressed genes co-expressed with murine IGs, we retrieved co-expression links from Gemma and COXPRESdb as described in the Methods section. For each gene co-expressed with IGs, we calculated a score that combined the number of IGs co-expressed with that gene and the intensity of the co-expression links. For COXPRESdb, for each gene g co-expressed with at least one IG with a mutual rank (MR) less than 1200, the score S(g) was where MRg,i was the mutual rank of the co-expression link between the gene g and the IG i, and n was the total number of IGs co-expressed with gene g with a MR less than 1200. For Gemma, for each gene g co-expressed with at least one IG with a positive support (SUP) of at least 2, the score S(g) was where SUPg,i was the positive support of the co-expression link between the gene g and the IG i, and n was the total number of IGs co-expressed with gene g with a positive support of at least 2. For each meta-analysis, the genes were ranked according to the scores. The lists from COXPRESdb and Gemma comprised 15,713 and 12,181 genes, respectively. We then measured the number of common genes found in the top x genes of both lists (Figure S17A). We compared this curve to the one we computed for the intersection of 2 gene lists composed of 15,713 and 12,181 genes randomly drawn from the 20,185 genes present in COXPRESdb and Gemma (Figure S17A). The number of common genes found in the ranked lists from COXPRESdb and Gemma is significantly higher than the number expected if genes were selected at random. For instance, the probability to find 324 common genes among the top 1250 ranked genes in both lists is p<3.10-123 (Figure S17A). However, the higher the top gene number, the higher the number of common genes found by chance. To figure out which top gene number to use, we calculated the True Discovery Rate for each top gene number, *i.e.* the ratio of true positive common genes to the false positive common genes (Figure S17B). Let C∩G(x) be the number of common genes found in the top x genes of the ranked lists from COXPRESdb and Gemma. R(x) is the number of common genes found in the 2 random lists as defined above. For 2 successive top gene numbers x1 and x2, TDR=((C∩G(x2)-R(x2)) – (C∩G(x1)-R(x1)))/(R(x2)-R(x1). We decided to stop “discovering” new common genes when the TDR reached 1, which indicated that, among the novel common genes, half were true positive. The human imprinted gene network was constructed using the procedure outlined above for the murine IGN.

**Supplemental Figure Legends**

**Figure S1. Topological characterization of the network of murine imprinted genes in Gemma**

The average degree and average support were computed for the network of 101 IGs displayed in figure 1C (red circle), for random networks (blue lines) generated by randomly drawing 1,000 sets of 101 Gene Symbols with data in Gemma, and for 50 sets of 101 genes with data in Gemma comprised in GO Biological Processes (green triangles) (see Table S24 for a full list of the GO BPs).

**Figure S2. Correlation of node degree in the COXPRESdb and Gemma networks of murine imprinted genes**

Degree in Gemma and COXPRESdb were plotted for each gene jointly found in the networks displayed in figures 1A and 1C, and the Pearson correlation coefficient was computed (r²=0.70).

**Figure S3. Edge similarity in the COXPRESdb and Gemma networks of murine imprinted genes**

Edges between the 80 murine IGs jointly found in the networks displayed in figures 1A and 1C were classified in 3 categories: present in both databases (139 edges, purple), present only in Gemma (176 edges, green), present only in COXPRESdb (181 edges, blue).

**Figure S4. Classification of IGs according to their connectivity in the COXPRESdb and Gemma networks of murine imprinted genes**

The relative degree difference in COXPRESdb and Gemma, *i.e.* |degree(COXPRESdb) - degree(Gemma)|x100/average(degree) was calculated for each IG, and plotted *vs.* the average degree. Dotted lines are arbitrarily drawn to classify IGs into 3 categories: highly and consistently connected genes are displayed on the right side, genes with a low and/or variable connectivity are displayed on the left side, and intermediate genes are displayed in the central part of the graph.

**Figure S5. Topological characterization of the network of human imprinted genes in Gemma**

The average degree and average support were computed for the network of 86 IGs displayed in figure 1D (red circle), for random networks (blue lines) generated by randomly drawing 1,000 sets of 86 genes with data in human Gemma, and for 50 sets of 86 genes with data in human Gemma comprised in GO Biological Processes (green triangles) (see Table S25 for a full list of the GO BPs).

**Figure S6. Imprinted genes are co-regulated upon cell cycle exit/re-entry in mouse embryonic fibroblasts**

Mouse embryonic fibroblasts were grown *in vitro* until they reached confluence and became quiescent. MEFs were left 48 hrs. at confluence before splitting, and expression levels of the indicated IGs were monitored by real-time PCR at the indicated time points. *Pcna* is a marker of cell proliferation. Data for each gene is expressed as the % of the maximal expression levels for that gene.

**Figure S7. Imprinted genes are co-regulated during muscle regeneration *in vivo***

Heat-map of IG expression in regenerating mouse *Tibialis anterior* following notexin injection. Imprinted gene expression was monitored in regenerating muscle at the indicated time points after notexin injection. Expression levels of proliferation, inflammation, and myogenesis markers as well as imprinted genes were measured by real-time PCR. Data for each gene is expressed as the % of the maximal expression levels for that gene.

**Figure S8. Methylation pattern of *Meg3* promoter and differentially methylated regions at IG loci.**

(A) Bisulfite treated genomic DNAs from BJ1 and JB6 MEFs grown *in vitro* for the indicated period of time were PCR amplified using primers specific for the *Meg3* promoter, subcloned, and sequenced. Filled and open circles denote methylated and unmethylated CpGs, respectively. Yellow circles denote variation from the corresponding C57BL/6J reference genome. B6 and JF1 indicate the parental allele from which each cloned amplicon is derived. Panels on the right side of the figure display the percentage of methylated maternal or paternal allele at each locus and each time point.

(B) Genomic DNA was restricted by McrBC, a methylation-dependent enzyme that cleaves DNA in the following context 5'-PumC(N)40-2000PumC-3'. Real-time PCR was performed in triplicate on undigested and digested genomic DNA. 2-DCp values were obtained by normalizing to 3 CpG-free loci, *i.e. Col1a2*, *Col3a1*, and *Col9a2*. IAP are fully methylated sequences from intracisternal A-particle retrotransposon. A CpG-free sequence from the *Dlk1*-*Meg3* locus was used as a negative control.

**Figure S9. Evaluation of siRNA efficiency.**

Exponentially growing 3T3-L1 cells were transfected with siRNAs targeting the indicated IGs. Expression of target transcripts were measured by RT-qPCR in confluent cells and results were normalized to the scramble siRNAs control conditions.

**Figure S10. Measurement of apoptosis by flow cytometry**

3T3-L1 cells were transfected with plasmids encoding a truncated rat CD2 and either CAT, TRP53, or one of the IGs. Apoptosis of CD2+ cells was determined using PE-annexin V binding and cell cytometry. Data are mean ± standard deviation of 2-4 independent experiments.

**Figure S11. Quantification of adipogenic differentiation by flow cytometry.**

(A) Quiescent 3T3-L1 preadipocytes were induced to differentiate by incubation with IDX. The accumulation of lipids in differentiated (day 8) *vs.* undifferentiated (day 0) 3T3-L1 cells was verified using Nile red, a fluorescent lipid stain.

(B) Increased cell granularity of IDX-treated 3T3-L1 cells correlates with Nile red staining. Cells displaying high SSC (R4, R5 and R6) display the most intense Nile Red staining. Undifferentiated cells are considered to be restricted to R1.

**Figure S12. Fold enrichment and gene count of over-represented GO terms and KEGG pathways.**

(A) GO terms and KEGG pathways enriched in the set of genes significantly up-regulated in 3T3-L1 Q *vs.* P and CE. The fold enrichment is displayed for GO terms/KEGG pathways with Benjamini-Hochberg-corrected p-values <0.05. The size of each dot is proportional to the number of genes associated to the corresponding GO term/KEGG pathway.

(B) Same as A for the set of genes significantly down-regulated in 3T3-L1 Q *vs.* P and CE. To avoid redundancy, only GO terms/KEGG pathways with Benjamini-Hochberg-corrected p-values <0.001 are considered.

**Figure S13. Identification of bi-allelically expressed genes co-expressed with human imprinted genes**

(A) Bi-allelically expressed genes co-expressed with human IGs were retrieved from Gemma and COXPRESdb. Co-expression links among genes present in the intersection of the 2 lists (see Supplemental Methods for details) were retrieved from Gemma and represented using Cytoscape. For the sake of clarity only those links with a positive support at least equal to 13 were represented. Node size and edge width do not map numerical data.

(B) GO terms and KEGG pathways enriched in the set of genes represented in A. The fold enrichment is displayed for GO terms/KEGG pathways with Benjamini-Hochberg-corrected p-values <0.05. The size of each dot is proportional to the number of genes associated with the corresponding GO term/KEGG pathway.

**Figure S14. Effect of IG over-expression on the expression levels of selected ECM genes**

Proliferating 3T3-L1 cells were transfected with cDNAs encoding different IGs and plated at mid-confluence. Three days post-transfection, when cells were confluent and quiescent, ECM gene expression was monitored using real time PCR. Data are mean ± standard deviation of 2 independent experiments. Only IG cDNAs inducing a statistically significant effect are displayed. Statistical significance was assessed using a non-parametric Mann-Whitney test. *, p<0.05; **, p<0.01; ***, p<0.001 compared to CAT-transfected cells.

**Figure S15. Effect of the cut-off value in COXPRESdb on the topology of the networks of murine imprinted genes**

Figure 1B was replicated with MRmax set at the indicated value. Only 1,000 sets of 85 randomly drawn genes were used instead of 10,000 in figure 1B.

**Figure S16. Topological characteristics of networks of murine imprinted genes at different cut-offs**

The average size of the largest connected component (A), average degree (B) and average MR (C) displayed in Figure S15 for each category of sets of genes were plotted *vs.* the value of the MRmax. Error bars for random networks represent the standard deviation. p-values for IGs and Bps at each MRmax are showed in Table S23.

**Figure S17. Construction of the Imprinted Gene Network.**

(A) Number of common genes found in the ranked lists of genes co-expressed with murine IGs in COXPRESdb and Gemma (COXPRESdb ∩ Gemma) or in 2 randomly generated lists of genes (Random). The indicated p-value is the probability to find the number of common genes observed in the top 1,250 genes from the 2 ranked lists generated from COXPRESdb and Gemma in the intersection of the top 1,250 genes from 2 ranked random lists. The error bars represent the 95% empirical confidence interval.

(B) See Supplemental Methods for details on the calculation of the true discovery rate. The dotted line indicates a true discovery rate of 1.

**Supplemental Tables**

**Table S1**. List of murine imprinted genes

**Table S2**. Statistics on GO terms, KEGG pathways, and chromosomal localizations associated with murine imprinted genes.

**Table S3**. List of co-expression links involving murine imprinted genes found in COXPRESdb.

**Table S4**. List of co-expression links involving murine imprinted genes found in Gemma.

**Table S5**. List of human imprinted genes.

**Table S6**. List of co-expression links involving human imprinted genes and human orthologues of mouse IGs whose imprinting status is unknown found in Gemma.

**Table S7**. List of rat imprinted genes and orthologues of murine imprinted genes.

**Table S8**. List of co-expression links involving rat imprinted genes and rat orthologues of mouse IGs whose imprinting status is unknown found in COXPRESdb.

**Table S9.** Expression levels of IGs in transfected 3T3-L1 compared to endogenous expression in confluent 3T3-L1 and MEFs.

**Table S10**. List of co-expression links involving murine imprinted and bi-allelically expressed genes found in COXPRESdb.

**Table S11**. Statistics on GO terms and KEGG pathways associated with murine imprinted and bi-allelically co-expressed genes. Only terms with Benjamini-Hochberg adjusted p-values <0.05 are reported.

**Table S12.** Statistics on GO terms and KEGG pathways associated with 25 networks made from genes co-expressed in COXPRESdb and Gemma with sets of 85 randomly drawn genes. Only terms with Benjamini-Hochberg adjusted p-values <0.05 are reported. Three terms over-represented in network #12 were also over-represented in the murine IGN (Table S11) and are highlighted. Genes found in the murine IGN and leading to the over-representation of these 3 terms are highlighted.

**Table S13.** List of co-expression links involving imprinted and bi-allelically expressed genes co-expressed with human imprinted genes in Gemma and COXPRESdb.

**Table S14.** Statistics on GO terms and KEGG pathways associated with bi-allelically expressed genes co-expressed with human imprinted genes in Gemma and COXPRESdb. Terms with Benjamini-Hochberg adjusted p-values above 0.05 are reported in italics.

**Table S15**. Imprinted genes and IGN members are enriched among genes significantly up-regulated in quiescent *vs.* proliferating 3T3-L1 preadipocyte. The calculated p-value is the hypergeometric probability.

**Table S16**. Statistics on GO terms and KEGG pathways associated with genes significantly up-regulated in quiescent *vs.* proliferating 3T3-L1 preadipocyte. Only terms with Benjamini-Hochberg adjusted p-values <0.05 are reported.

**Table S17**. Statistics on GO terms and KEGG pathways associated with genes significantly down-regulated in quiescent *vs.* proliferating 3T3-L1 preadipocyte. Only terms with Benjamini-Hochberg adjusted p-values <0.05 are reported.

**Table S18.** Sequences of primers used to study the methylation pattern of imprinted loci.

**Table S19.** Details on the cloning strategy to construct IG cDNA expression vectors.

**Table S20**. Sequences of siRNAs used in this study.

**Table S21**. Sequences of primers used for real-time, quantitative RT-PCR.

**Table S22.** List of the 50 Gene Ontology Biological Processes and corresponding GeneIDs used in figure 1B.

**Table S23.** p-values were computed from the empirical cumulative density function of the corresponding parameter in 1,000 sets of 85 randomly drawn genes. For MRmax=1,200 (bold), the p-values for IGs were calculated from 10,000 sets of 85 randomly drawn genes and the p-values are displayed on Figure S16.

**Table S24.** List of the 50 Gene Ontology Biological Processes and corresponding Gene Symbols used in figure S1.

**Table S25.** List of the 50 Gene Ontology Biological Processes and corresponding Gene Symbols used in figure S5.

**Supplemental References**

Oakes CC, La Salle S, Robaire B, Trasler JM. 2006. Evaluation of a quantitative DNA methylation analysis technique using methylation-sensitive/dependent restriction enzymes and real-time PCR. *Epigenetics Off J DNA Methylation Soc* **1**: 146–152.

Obayashi T, Kinoshita K. 2009. Rank of correlation coefficient as a comparable measure for biological significance of gene coexpression. *DNA Res Int J Rapid Publ Rep Genes Genomes* **16**: 249–260.
