# Supplementary material for: A systems-level approach to parental genomic imprinting: the imprinted gene network includes extracellular matrix genes and regulates cell cycle exit and differentiation
Source: HighWire-hosted journal article supplement (doi:10.1101/gr.175919.114), 2015-01-22
Supplement: Table_S1.xlsx [file Table_S1.xlsx]

## Sheet: Mm_IGs
Symbol	Gene ID	Chrom#	Chromosome Region	Start	End	Strand	Expressed Parental Allele	Name	COXPRESdb	Gemma
Gpr1	241070	1	63229265..63260783	63229265	63260783	-	P	G protein-coupled receptor 1
Zdbf2	73884	1	63319843..63361149	63319843	63361149	+	P	zinc finger, DBF-type containing 2	No data
Sfmbt2	353282	2	10294209..10516787	10294209	10516787	+	P	Scm-like with four mbt domains 2
Wt1	22431	2	104966686..105013771	104966686	105013771	+	M	Wilms tumor 1 homolog
Gatm	67092	2	122420209..122437013	122420209	122437013	-	M	glycine amidinotransferase (L-arginine:glycine amidinotransferase)
H13	14950	2	152495197..152534404	152495197	152534404	+	M	histocompatibility 13
Mcts2	66405	2	152512884..152513682	152512884	152513682	+	P	malignant T cell amplified sequence 2
Blcap	53619	2	157382098..157392097	157382098	157392097	-	isoform/tissue dependent	bladder cancer associated protein homolog (human)
Nnat	18111	2	157385846..157388258	157385846	157388258	+	P	neuronatin
Nespas	56802	2	174106738..174120937	174106738	174120937	-	P	neuroendocrine secretory protein antisense
Gnas	14683	2	174109821..174172245	174109821	174172245	+	isoform/tissue dependent	GNAS (guanine nucleotide binding protein, alpha stimulating) complex locus
Mkrn1-ps1	353327	5	89266824..89268424	89266824	89268424	+	P	makorin, ring finger protein 1, pseudogene 1	No data	No data
Calcr	12311	6	3635720..3714713	3635720	3714713	-	M	calcitonin receptor
Tfpi2	21789	6	3912595..3918354	3912595	3918354	-	M	tissue factor pathway inhibitor 2
Casd1	213819	6	4551066..4593381	4551066	4593381	+	M	CAS1 domain containing 1
Sgce	20392	6	4624350..4697204	4624350	4697204	-	P	sarcoglycan, epsilon
Peg10	170676	6	4697306..4710517	4697306	4710517	+	P	paternally expressed 10
Ppp1r9a	243725	6	4853320..5115661	4853320	5115661	+	M	protein phosphatase 1, regulatory (inhibitor) subunit 9A
Pon3	269823	6	5170852..5206233	5170852	5206233	-	M	paraoxonase 3
Pon2	330260	6	5214624..5248373	5214624	5248373	-	M	paraoxonase 2
Asb4	65255	6	5333386..5383022	5333386	5383022	+	M	ankyrin repeat and SOCS box-containing 4
Dlx5	13395	6	6827805..6832068	6827805	6832068	-	M	distal-less homeobox 5
Mest	17294	6	30688063..30698457	30688063	30698457	+	P	mesoderm specific transcript
Mir335	723930	6	30691299..30691396	30691299	30691396	+	P	microRNA 335	No data	No data
Copg2	54160	6	30698411..30846760	30698411	30846760	-	M	coatomer protein complex, subunit gamma 2
Copg2as2	100044236	6	30774783..30777223	30774783	30777223	+	P	coatomer protein complex, subunit gamma 2, antisense 2	No data
Klf14	619665	6	30906021..30908990	30906021	30908990	-	M	Kruppel-like factor 14	No data
Nap1l5	58243	6	58855227..58857120	58855227	58857120	-	P	nucleosome assembly protein 1-like 5
Cntn3	18488	6	102113300..102414661	102113300	102414661	-	M	contactin 3
Klrb1f	232408	6	128995919..129007489	128995919	129007489	+	M	killer cell lectin-like receptor subfamily B member 1F
Copg2as1	108640	6	prox 6				P	coatomer protein complex, subunit gamma 2, antisense 1	No data	No data
Zim2	76637	7	6604459..6615117	6604459	6615117	-	M	zinc finger, imprinted 2		No data
Zim1	22776	7	6628154..6649143	6628154	6649143	-	M	zinc finger, imprinted 1
Peg3	18616	7	6658671..6683130	6658671	6683130	-	P	paternally expressed 3
Peg3as	100169889	7	6659471..6660335	6659471	6660335	+	P	Apeg3	No data
Usp29	57775	7	6683452..6919931	6683452	6919931	+	P	ubiquitin specific peptidase 29
Zim3	116811	7	6929018..6930131	6929018	6930131	-	M	zinc finger, imprinted 3
Zfp264	116812	7	6929957..6943798	6929957	6943798	+	P	zinc finger protein 264		No data
Axl	26362	7	26542292..26573560	26542292	26573560	-	M	AXL receptor tyrosine kinase
Ube3a	22215	7	66484120..66562097	66484120	66562097	+	M	ubiquitin protein ligase E3A
Ipw	16353	7	66874528..66934248	66874528	66934248	-	P	imprinted gene in the Prader-Willi syndrome region
Snord116	64243	7	66931360..66931449	66931360	66931449	-	P	small nucleolar RNA, C/D box 116 cluster		No data
Snord64	100217429	7	67123697..67123742	67123697	67123742	-	P	small nucleolar RNA, C/D box 64	No data	No data
Snurf	84704	7	67127388..67150042	67127388	67150042	-	P	SNRPN upstream reading frame	No data
Snrpn	20646	7	67127388..67285105	67127388	67285105	-	P	small nuclear ribonucleoprotein N
Ndn	17984	7	69493163..69494814	69493163	69494814	+	P	necdin
Magel2	27385	7	69521865..69526526	69521865	69526526	+	P	melanoma antigen, family L, 2
Mkrn3	22652	7	69562479..69565025	69562479	69565025	-	P	makorin, ring finger protein, 3
Peg12	27412	7	69606757..69609396	69606757	69609396	-	P	paternally expressed 12 ; Frat3
Art5	11875	7	109245393..109248743	109245393	109248743	-	M	ADP-ribosyltransferase 5
Ampd3	11717	7	117916118..117955909	117916118	117955909	+	M	adenosine monophosphate deaminase 3
H19	14955	7	149761437..149764051	149761437	149764051	-	M	H19 fetal liver mRNA
Igf2	16002	7	149836673..149846940	149836673	149846940	-	P	insulin-like growth factor 2
Igf2as	111975	7	149845598..149856261	149845598	149856261	+	P	insulin-like growth factor 2, antisense
Ins2	16334	7	149864561..149865613	149864561	149865613	-	P	insulin II
Th	21823	7	150078681..150085871	150078681	150085871	-	M	tyrosine hydroxylase
Ascl2	17173	7	150152727..150155169	150152727	150155169	-	M	achaete-scute complex homolog 2 (Drosophila)
Tspan32	27027	7	150190951..150205391	150190951	150205391	+	M	tetraspanin 32
Cd81	12520	7	150238655..150253835	150238655	150253835	+	M	CD81 antigen
Tssc4	56844	7	150255273..150256992	150255273	150256992	+	M	tumor-suppressing subchromosomal transferable fragment 4
Kcnq1	16535	7	150293159..150612947	150293159	150612947	+	M	potassium voltage-gated channel, subfamily Q, member 1
Kcnq1ot1	63830	7	150399016..150482452	150399016	150482452	-	P	KCNQ1 overlapping transcript 1
Cdkn1c	12577	7	150644244..150646955	150644244	150646955	-	M	cyclin-dependent kinase inhibitor 1C (P57)
AF313042	79195	7	150648434..150648750	150648434	150648750	+	M	cDNA sequence AF313042; Msuit1	No data	No data
Slc22a18	18400	7	150659660..150685239	150659660	150685239	+	M	solute carrier family 22 (organic cation transporter), member 18
Phlda2	22113	7	150687453..150688429	150687453	150688429	-	M	pleckstrin homology-like domain, family A, member 2
Nap1l4	17955	7	150699484..150734995	150699484	150734995	-	M	nucleosome assembly protein 1-like 4
Osbpl5	79196	7	150874667..150927868	150874667	150927868	-	M	oxysterol binding protein-like 5
Dhcr7	13360	7	151009072..151034315	151009072	151034315	+	M	7-dehydrocholesterol reductase
Zfp127as	111974	7	?				P	zinc finger protein 127, antisense	No data	No data
Snord115	493919	7	?				P	Small nucleolar RNA, C/D Box 115 cluster	No data	No data
Mir184	387179	9	89697098..89697166	89697098	89697166	-	P	microRNA 184	No data	No data
Rasgrf1	19417	9	89804613..89921817	89804613	89921817	+	P	RAS protein-specific guanine nucleotide-releasing factor 1
Mst1r	19882	9	107809220..107822714	107809220	107822714	+	M	macrophage stimulating 1 receptor (c-met-related tyrosine kinase)
Plagl1	22634	10	12810594..12851500	12810594	12851500	+	P	pleiomorphic adenoma gene-like 1
Dcn	13179	10	96942134..96980796	96942134	96980796	+	M	decorin
Ddc	13195	11	11714104..11798147	11714104	11798147	-	P	dopa decarboxylase
Grb10	14783	11	11830502..11937423	11830502	11937423	-	isoform/tissue dependent	growth factor receptor bound protein 10
Cobl	12808	11	12136679..12364963	12136679	12364963	-	M	cordon-bleu
Commd1	17846	11	22799728..22882284	22799728	22882284	-	isoform/tissue dependent	COMM domain containing 1
Zrsr1	22183	11	22872029..22874908	22872029	22874908	+	P	zinc finger (CCCH type), RNA binding motif and serine/arginine rich 1
Scin	20259	12	40786356..40860815	40786356	40860815	-	M	scinderin
Begain	380785	12	110270392..110306427	110270392	110306427	-	P	brain-enriched guanylate kinase-associated	No data	No data
Dlk1	13386	12	110691033..110701546	110691033	110701546	+	P	delta-like 1 homolog (Drosophila)
Meg3	17263	12	110779206..110809939	110779206	110809939	+	M	maternally expressed 3
Mir337	723843	12	110823999..110824095	110823999	110824095	+	M	microRNA 337	No data	No data
Rtl1	353326	12	110828379..110833613	110828379	110833613	-	P	retrotransposon-like 1	No data	No data
Mir431	723866	12	110828657..110828747	110828657	110828747	+	M	microRNA 431	No data
Mir433	723937	12	110829925..110830048	110829925	110830048	+	M	microRNA 433	No data
Mir127	387146	12	110831056..110831125	110831056	110831125	+	M	microRNA 127	No data
Mir434	723867	12	110832716..110832809	110832716	110832809	+	M	microRNA 434	No data	No data
Mir136	387154	12	110833537..110833598	110833537	110833598	+	M	microRNA 136	No data	No data
Rian	75745	12	110842155..110899926	110842155	110899926	+	M	RNA imprinted and accumulated in nucleus
Mir370	723854	12	110856468..110856546	110856468	110856546	+	M	microRNA 370	No data	No data
AF357425	449562	12	110874234..110874290	110874234	110874290	+	M	snoRNA AF357425	No data	No data
AF357426	449561	12	110881059..110881114	110881059	110881114	+	M	snoRNA AF357426	No data	No data
AF357359	100303647	12	110888919..110888948	110888919	110888948	+	M	MBII-426	No data	No data
AF357355	100303646	12	110892851..110892904	110892851	110892904	+	M	MBII-343	No data
AF357428	449563	12	110918169..110918220	110918169	110918220	+	M	snoRNA AF357428	No data	No data
AF357341	493920	12	110919741..110919798	110919741	110919798	+	M	snoRNA AF357341	No data	No data
Mir411	723936	12	110948385..110948466	110948385	110948466	+	M	microRNA 411	No data	No data
Mir380	723859	12	110950013..110950073	110950013	110950073	+	M	microRNA 380	No data	No data
Mir376b	723934	12	110961668..110961749	110961668	110961749	+	M	microRNA 376b	No data	No data
Mir134	387152	12	110972349..110972419	110972349	110972419	+	M	microRNA 134	No data
Mirg	100040724	12	110973191..110987668	110973191	110987668	+		miRNA containing gene	No data
Mir154	387172	12	110976643..110976708	110976643	110976708	+	M	microRNA 154	No data	No data
Mir410	723863	12	110981925..110982005	110981925	110982005	+	M	microRNA 410	No data	No data
Dio3	107585	12	111517440..111519307	111517440	111519307	+	P	deiodinase, iodothyronine type III	No data
Cmah	12763	13	24419289..24569154	24419289	24569154	+	M	cytidine monophospho-N-acetylneuraminic acid hydroxylase
Drd1a	13488	13	54146552..54151027	54146552	54151027	-	M	dopamine receptor D1A
Pde4d	238871	13	109444299..110746177	109444299	110746177	+	P	phosphodiesterase 4D, cAMP specific
Htr2a	15558	14	75040647..75106666	75040647	75106666	+	M	5-hydroxytryptamine (serotonin) receptor 2A	No data
Kcnk9	223604	15	72342549..72376709	72342549	72376709	-	M	potassium channel, subfamily K, member 9	No data	No data
Trappc9	76510	15	72420050..72891634	72420050	72891634	-	M	trafficking protein particle complex 9
Peg13	353342	15	72636034..72640754	72636034	72640754	-	P	paternally expressed 13
Slc38a4	69354	15	96825254..96886387	96825254	96886387	-	P	solute carrier family 38, member 4
Fbxo40	207215	16	36966159..36979222	36966159	36979222	-	M	F-box protein 40	No data
Slc22a3	20519	17	12612838..12700570	12612838	12700570	-	M	solute carrier family 22 (organic cation transporter), member 3
Slc22a2	20518	17	12777055..12821354	12777055	12821354	+	M	solute carrier family 22 (organic cation transporter), member 2
Igf2r	16004	17	12875272..12962572	12875272	12962572	-	M	insulin-like growth factor 2 receptor
Airn	104103	17	12934177..13052750	12934177	13052750	+	P	antisense Igf2r RNA
Qpct	70536	17	79451246..79489583	79451246	79489583	+	M	glutaminyl-peptide cyclotransferase (glutaminyl cyclase)
Impact	16210	18	13130761..13151457	13130761	13151457	+	P	imprinted and ancient
Tbc1d12	209478	19	38911069..38994413	38911069	38994413	+	P	TBC1D12: TBC1 domain family, member 12
