# Supplementary material for: A systems-level approach to parental genomic imprinting: the imprinted gene network includes extracellular matrix genes and regulates cell cycle exit and differentiation
Source: HighWire-hosted journal article supplement (doi:10.1101/gr.175919.114), 2015-01-22
Supplement: Table_S2.xlsx [file Table_S2.xlsx]

## Sheet: GO+KEGG+CHROM analysis (DAVID)
Category	Term	Count	%	p-value	Benjamini	Fold Enrichment	Bonferroni	FDR	GeneIDs	Symbols	List Total	Pop Hits	Pop Total
CHROMOSOME	7	38	31.6667	1.7561e-13	3.16147e-12	4.01282	3.16147e-12	1.29463e-10	14955, 11875, 63830, 56844, 22776, 11717, 22652, 17173, 116811, 116812, 12520, 84704, 12577, 17984, 26362, 27385, 22113, 27027, 79195, 79196, 111974, 22215, 76637, 111975, 16535, 16353, 13360, 21823, 16334, 27412, 100169889, 16002, 64243, 100217429, 20646, 18616, 18400, 493919, 57775, 17955	H19,Art5,Kcnq1ot1,Tssc4,Zim1,Ampd3,Mkrn3,Ascl2,Zim3,Zfp264,Cd81,Snurf,Cdkn1c,Ndn,Axl,Magel2,Phlda2,Tspan32,AF313042,Osbpl5,Zfp127as,Ube3a,Zim2,Igf2as,Kcnq1,Ipw,Dhcr7,Th,Ins2,Peg12,Peg3as,Igf2,Snord116,Snord64,Snrpn,Peg3,Slc22a18,Snord115,Usp29,Nap1l4	120	4272	54135
CHROMOSOME	12	25	20.8333	6.2845e-10	5.65605e-09	4.61462	1.13121e-08	4.63245e-07	723934, 387154, 723937, 387152, 493920, 723936, 100040724, 723863, 75745, 723843, 723859, 380785, 387146, 17263, 387172, 449561, 20259, 723854, 449562, 13386, 449563, 353326, 723866, 723867, 107585	Mir376b,Mir136,Mir433,Mir134,AF357341,Mir411,Mirg,Mir410,Rian,Mir337,Mir380,Begain,Mir127,Meg3,Mir154,AF357426,Scin,Mir370,AF357425,Dlk1,AF357428,Rtl1,Mir431,Mir434,Dio3	120	2444	54135
CHROMOSOME	6	19	15.8333	0.000214884	0.00128861	2.68527	0.00386086	0.158288	213819, 65255, 619665, 170676, 21789, 58243, 18488, 54160, 269823, 13395, 12311, 17294, 108640, 100044236, 232408, 20392, 330260, 723930, 243725	Casd1,Asb4,Klf14,Peg10,Tfpi2,Nap1l5,Cntn3,Copg2,Pon3,Dlx5,Calcr,Mest,Copg2as1,Copg2as2,Klrb1f,Sgce,Pon2,Mir335,Ppp1r9a	120	3192	54135
GOTERM_BP_FAT	GO:0043085~positive regulation of catalytic activity	7	5.83333	0.00191723	0.529159	5.28158	0.778309	2.8957	12311, 13488, 16334, 12520, 15558, 19417, 14683	Calcr,Drd1a,Ins2,Cd81,Htr2a,Rasgrf1,Gnas	69	261	13588
GOTERM_BP_FAT	GO:0044093~positive regulation of molecular function	7	5.83333	0.0042159	0.563566	4.50488	0.963719	6.26417	12311, 13488, 16334, 12520, 15558, 19417, 14683	Calcr,Drd1a,Ins2,Cd81,Htr2a,Rasgrf1,Gnas	69	306	13588
GOTERM_BP_FAT	GO:0048666~neuron development	7	5.83333	0.00335313	0.584751	4.72087	0.928398	5.01288	13488, 21823, 12577, 17984, 19417, 243725, 13395	Drd1a,Th,Cdkn1c,Ndn,Rasgrf1,Ppp1r9a,Dlx5	69	292	13588
GOTERM_MF_FAT	GO:0004190~aspartic-type endopeptidase activity	3	2.5	0.00572286	0.652166	25.9025	0.652166	6.84944	353326, 14950, 170676	Rtl1,H13,Peg10	57	27	13288
GOTERM_MF_FAT	GO:0070001~aspartic-type peptidase activity	3	2.5	0.00572286	0.652166	25.9025	0.652166	6.84944	353326, 14950, 170676	Rtl1,H13,Peg10	57	27	13288
KEGG_PATHWAY	mmu04540:Gap junction	3	2.5	0.029078	0.664401	10.5349	0.664401	23.2769	13488, 15558, 14683	Drd1a,Htr2a,Gnas	19	86	5738
GOTERM_BP_FAT	GO:0007169~transmembrane receptor protein tyrosine kinase signaling pathway	5	4.16667	0.0155857	0.708615	5.12832	0.999996	21.3785	19882, 16334, 14783, 17984, 26362	Mst1r,Ins2,Grb10	69	192	13588
GOTERM_BP_FAT	GO:0051349~positive regulation of lyase activity	3	2.5	0.0186787	0.708716	14.0663	1	25.0771	12311, 13488, 14683	Calcr,Drd1a,Gnas	69	42	13588
GOTERM_BP_FAT	GO:0031281~positive regulation of cyclase activity	3	2.5	0.0186787	0.708716	14.0663	1	25.0771	12311, 13488, 14683	Calcr,Drd1a,Gnas	69	42	13588
GOTERM_BP_FAT	GO:0045762~positive regulation of adenylate cyclase activity	3	2.5	0.0186787	0.708716	14.0663	1	25.0771	12311, 13488, 14683	Calcr,Drd1a,Gnas	69	42	13588
GOTERM_BP_FAT	GO:0006349~genetic imprinting	3	2.5	0.00157682	0.710263	49.2319	0.710263	2.38736	16535, 63830, 104103	Kcnq1,Kcnq1ot1,Airn	69	12	13588
GOTERM_BP_FAT	GO:0010579~positive regulation of adenylate cyclase activity by G-protein signaling pathway	3	2.5	0.0111107	0.71434	18.462	0.999845	15.7243	12311, 13488, 14683	Calcr,Drd1a,Gnas	69	32	13588
GOTERM_BP_FAT	GO:0007189~activation of adenylate cyclase activity by G-protein signaling pathway	3	2.5	0.0111107	0.71434	18.462	0.999845	15.7243	12311, 13488, 14683	Calcr,Drd1a,Gnas	69	32	13588
GOTERM_BP_FAT	GO:0010578~regulation of adenylate cyclase activity involved in G-protein signaling	3	2.5	0.0111107	0.71434	18.462	0.999845	15.7243	12311, 13488, 14683	Calcr,Drd1a,Gnas	69	32	13588
GOTERM_CC_FAT	GO:0031988~membrane-bounded vesicle	5	4.16667	0.0913939	0.720491	2.86264	0.999997	67.3942	12311, 21823, 16334, 16004, 54160	Calcr,Th,Ins2,Igf2r,Copg2	52	420	12504
GOTERM_BP_FAT	GO:0042493~response to drug	4	3.33333	0.00971515	0.721205	8.95125	0.99953	13.8848	13488, 15558, 18400, 14683	Drd1a,Htr2a,Slc22a18,Gnas	69	88	13588
GOTERM_BP_FAT	GO:0030182~neuron differentiation	7	5.83333	0.0146179	0.723188	3.45487	0.99999	20.1866	13488, 21823, 12577, 17984, 19417, 243725, 13395	Drd1a,Th,Cdkn1c,Ndn,Rasgrf1,Ppp1r9a,Dlx5	69	399	13588
GOTERM_BP_FAT	GO:0007190~activation of adenylate cyclase activity	3	2.5	0.0178462	0.72337	14.4093	0.999999	24.098	12311, 13488, 14683	Calcr,Drd1a,Gnas	69	41	13588
GOTERM_BP_FAT	GO:0019932~second-messenger-mediated signaling	4	3.33333	0.021259	0.726802	6.67551	1	28.0375	12311, 13488, 15558, 14683	Calcr,Drd1a,Htr2a,Gnas	69	118	13588
GOTERM_BP_FAT	GO:0009719~response to endogenous stimulus	5	4.16667	0.0135221	0.73708	5.35129	0.999977	18.8167	13488, 21823, 16334, 84704, 20646, 67092	Drd1a,Th,Ins2,Snurf,Snrpn,Gatm	69	184	13588
GOTERM_MF_FAT	GO:0035240~dopamine binding	2	1.66667	0.0291364	0.743388	66.6065	0.995664	30.6189	13488, 21823	Drd1a,Th	57	7	13288
GOTERM_BP_FAT	GO:0042398~cellular amino acid derivative biosynthetic process	3	2.5	0.0240065	0.74398	12.308	1	31.0693	13195, 21823, 67092	Ddc,Th,Gatm	69	48	13588
GOTERM_BP_FAT	GO:0006140~regulation of nucleotide metabolic process	3	2.5	0.0542074	0.745174	7.8771	1	57.4019	12311, 13488, 14683	Calcr,Drd1a,Gnas	69	75	13588
GOTERM_BP_FAT	GO:0030814~regulation of cAMP metabolic process	3	2.5	0.0442969	0.745373	8.81765	1	50.0301	12311, 13488, 14683	Calcr,Drd1a,Gnas	69	67	13588
GOTERM_BP_FAT	GO:0007191~activation of adenylate cyclase activity by dopamine receptor signaling pathway	2	1.66667	0.039351	0.745946	49.2319	1	45.9204	13488, 14683	Drd1a,Gnas	69	8	13588
GOTERM_BP_FAT	GO:0030808~regulation of nucleotide biosynthetic process	3	2.5	0.0479267	0.747646	8.43975	1	52.8584	12311, 13488, 14683	Calcr,Drd1a,Gnas	69	70	13588
GOTERM_BP_FAT	GO:0030802~regulation of cyclic nucleotide biosynthetic process	3	2.5	0.0479267	0.747646	8.43975	1	52.8584	12311, 13488, 14683	Calcr,Drd1a,Gnas	69	70	13588
GOTERM_BP_FAT	GO:0040029~regulation of gene expression, epigenetic	3	2.5	0.0479267	0.747646	8.43975	1	52.8584	16535, 63830, 104103	Kcnq1,Kcnq1ot1,Airn	69	70	13588
GOTERM_BP_FAT	GO:0009725~response to hormone stimulus	4	3.33333	0.0496792	0.748249	4.774	1	54.1697	21823, 16334, 84704, 20646, 67092	Th,Ins2,Snurf,Snrpn,Gatm	69	165	13588
GOTERM_BP_FAT	GO:0019935~cyclic-nucleotide-mediated signaling	3	2.5	0.043111	0.749359	8.95125	1	49.0722	12311, 13488, 14683	Calcr,Drd1a,Gnas	69	66	13588
GOTERM_BP_FAT	GO:0030799~regulation of cyclic nucleotide metabolic process	3	2.5	0.0516613	0.750419	8.09291	1	55.6117	12311, 13488, 14683	Calcr,Drd1a,Gnas	69	73	13588
GOTERM_BP_FAT	GO:0051966~regulation of synaptic transmission, glutamatergic	2	1.66667	0.0584504	0.751065	32.8213	1	60.2359	13488, 15558	Drd1a,Htr2a	69	12	13588
GOTERM_BP_FAT	GO:0042423~catecholamine biosynthetic process	2	1.66667	0.0584504	0.751065	32.8213	1	60.2359	13195, 21823	Ddc,Th	69	12	13588
GOTERM_BP_FAT	GO:0007617~mating behavior	2	1.66667	0.0537109	0.752906	35.805	1	57.0582	13488, 21823	Drd1a,Th	69	11	13588
GOTERM_BP_FAT	GO:0019220~regulation of phosphate metabolic process	5	4.16667	0.0638453	0.753336	3.27122	1	63.5851	16334, 12520, 12577, 15558, 16210	Ins2,Cd81,Cdkn1c,Htr2a,Impact	69	301	13588
GOTERM_BP_FAT	GO:0051174~regulation of phosphorus metabolic process	5	4.16667	0.0638453	0.753336	3.27122	1	63.5851	16334, 12520, 12577, 15558, 16210	Ins2,Cd81,Cdkn1c,Htr2a,Impact	69	301	13588
GOTERM_BP_FAT	GO:0051339~regulation of lyase activity	3	2.5	0.0384913	0.753543	9.52875	1	45.1745	12311, 13488, 14683	Calcr,Drd1a,Gnas	69	62	13588
GOTERM_BP_FAT	GO:0031279~regulation of cyclase activity	3	2.5	0.0384913	0.753543	9.52875	1	45.1745	12311, 13488, 14683	Calcr,Drd1a,Gnas	69	62	13588
GOTERM_BP_FAT	GO:0030817~regulation of cAMP biosynthetic process	3	2.5	0.0419374	0.753722	9.08896	1	48.1073	12311, 13488, 14683	Calcr,Drd1a,Gnas	69	65	13588
GOTERM_BP_FAT	GO:0042325~regulation of phosphorylation	5	4.16667	0.057216	0.753782	3.3953	1	59.4302	16334, 12520, 12577, 15558, 16210	Ins2,Cd81,Cdkn1c,Htr2a,Impact	69	290	13588
GOTERM_CC_FAT	GO:0030135~coated vesicle	3	2.5	0.090883	0.75538	5.81762	0.999997	67.1791	21823, 16004, 54160	Th,Igf2r,Copg2	52	124	12504
GOTERM_BP_FAT	GO:0051970~negative regulation of transmission of nerve impulse	2	1.66667	0.0678592	0.756938	28.1325	1	65.9039	13488, 15558	Drd1a,Htr2a	69	14	13588
GOTERM_BP_FAT	GO:0045669~positive regulation of osteoblast differentiation	2	1.66667	0.0678592	0.756938	28.1325	1	65.9039	14683, 13395	Gnas,Dlx5	69	14	13588
GOTERM_BP_FAT	GO:0043405~regulation of MAP kinase activity	3	2.5	0.0661912	0.757008	7.03313	1	64.9576	16334, 12520, 15558	Ins2,Cd81,Htr2a	69	84	13588
GOTERM_BP_FAT	GO:0007611~learning or memory	3	2.5	0.0731962	0.758461	6.63801	1	68.7736	13488, 21823, 15558	Drd1a,Th,Htr2a	69	89	13588
GOTERM_BP_FAT	GO:0007167~enzyme linked receptor protein signaling pathway	5	4.16667	0.0477476	0.758879	3.60673	1	52.7225	19882, 16334, 14783, 17984, 26362	Mst1r,Ins2,Grb10,Ndn,Axl	69	273	13588
GOTERM_BP_FAT	GO:0050805~negative regulation of synaptic transmission	2	1.66667	0.0631664	0.758963	30.2965	1	63.1787	13488, 15558	Drd1a,Htr2a	69	13	13588
GOTERM_BP_FAT	GO:0015695~organic cation transport	2	1.66667	0.0631664	0.758963	30.2965	1	63.1787	20518, 20519	Slc22a2,Slc22a3	69	13	13588
GOTERM_BP_FAT	GO:0051336~regulation of hydrolase activity	4	3.33333	0.0750076	0.759107	4.01893	1	69.6951	13488, 15558, 19417, 209478	Drd1a,Htr2a,Rasgrf1,Tbc1d12	69	196	13588
GOTERM_BP_FAT	GO:0019933~cAMP-mediated signaling	3	2.5	0.0373681	0.75916	9.68496	1	44.1856	12311, 13488, 14683	Calcr,Drd1a,Gnas	69	61	13588
GOTERM_BP_FAT	GO:0009791~post-embryonic development	3	2.5	0.070366	0.761151	6.7906	1	67.2811	13360, 14683, 13386	Dhcr7,Gnas,Dlk1	69	87	13588
GOTERM_BP_FAT	GO:0040007~growth	4	3.33333	0.0723442	0.762547	4.0814	1	68.3312	13360, 22215, 17984, 67092	Dhcr7,Ube3a,Ndn,Gatm	69	193	13588
GOTERM_BP_FAT	GO:0051345~positive regulation of hydrolase activity	3	2.5	0.0621041	0.762607	7.29361	1	62.5342	13488, 15558, 19417	Drd1a,Htr2a,Rasgrf1	69	81	13588
GOTERM_BP_FAT	GO:0015837~amine transport	3	2.5	0.0775095	0.762924	6.42155	1	70.9262	20519, 13488, 69354	Slc22a3,Drd1a,Slc38a4	69	92	13588
GOTERM_BP_FAT	GO:0009991~response to extracellular stimulus	4	3.33333	0.028964	0.763553	5.92263	1	36.2399	20519, 17294, 26362, 67092	Slc22a3,Mest,Axl,Gatm	69	133	13588
GOTERM_BP_FAT	GO:0044057~regulation of system process	4	3.33333	0.0795427	0.764461	3.91896	1	71.8921	13488, 21823, 15558, 19417	Drd1a,Th,Htr2a,Rasgrf1	69	201	13588
GOTERM_BP_FAT	GO:0007613~memory	3	2.5	0.00918266	0.765039	20.3718	0.999284	13.173	13488, 21823, 15558	Drd1a,Th,Htr2a	69	29	13588
GOTERM_BP_FAT	GO:0007187~G-protein signaling, coupled to cyclic nucleotide second messenger	3	2.5	0.0362578	0.765327	9.84638	1	43.1918	12311, 13488, 14683	Calcr,Drd1a,Gnas	69	60	13588
GOTERM_BP_FAT	GO:0045761~regulation of adenylate cyclase activity	3	2.5	0.0362578	0.765327	9.84638	1	43.1918	12311, 13488, 14683	Calcr,Drd1a,Gnas	69	60	13588
GOTERM_BP_FAT	GO:0007188~G-protein signaling, coupled to cAMP nucleotide second messenger	3	2.5	0.0309072	0.76536	10.7415	1	38.1658	12311, 13488, 14683	Calcr,Drd1a,Gnas	69	55	13588
GOTERM_BP_FAT	GO:0043406~positive regulation of MAP kinase activity	3	2.5	0.0351608	0.7721	10.0133	1	42.1935	16334, 12520, 15558	Ins2,Cd81,Htr2a	69	59	13588
GOTERM_BP_FAT	GO:0006939~smooth muscle contraction	2	1.66667	0.0863999	0.778923	21.8808	1	74.9329	13488, 238871	Drd1a,Pde4d	69	18	13588
GOTERM_BP_FAT	GO:0015844~monoamine transport	2	1.66667	0.0863999	0.778923	21.8808	1	74.9329	20519, 13488	Slc22a3,Drd1a	69	18	13588
GOTERM_BP_FAT	GO:0031645~negative regulation of neurological system process	2	1.66667	0.0863999	0.778923	21.8808	1	74.9329	13488, 15558	Drd1a,Htr2a	69	18	13588
GOTERM_BP_FAT	GO:0001659~temperature homeostasis	2	1.66667	0.0863999	0.778923	21.8808	1	74.9329	13488, 15558	Drd1a,Htr2a	69	18	13588
GOTERM_BP_FAT	GO:0007242~intracellular signaling cascade	9	7.5	0.0854297	0.782148	1.93699	1	74.5222	12311, 65255, 13488, 16334, 22215, 12520, 15558, 19417, 14683	Calcr,Asb4,Drd1a,Ins2,Ube3a,Cd81,Htr2a,Rasgrf1,Gnas	69	915	13588
GOTERM_CC_FAT	GO:0016023~cytoplasmic membrane-bounded vesicle	5	4.16667	0.0877818	0.782909	2.90412	0.999995	65.8459	12311, 21823, 16334, 16004, 54160	Calcr,Th,Ins2,Igf2r,Copg2	52	414	12504
GOTERM_BP_FAT	GO:0007618~mating	2	1.66667	0.090978	0.783057	20.7292	1	76.7888	13488, 21823	Drd1a,Th	69	19	13588
GOTERM_BP_FAT	GO:0019098~reproductive behavior	2	1.66667	0.090978	0.783057	20.7292	1	76.7888	13488, 21823	Drd1a,Th	69	19	13588
GOTERM_BP_FAT	GO:0048589~developmental growth	3	2.5	0.0893878	0.783762	5.90783	1	76.1593	22215, 17984, 67092	Ube3a,Ndn,Gatm	69	100	13588
GOTERM_BP_FAT	GO:0050804~regulation of synaptic transmission	3	2.5	0.0893878	0.783762	5.90783	1	76.1593	13488, 15558, 19417	Drd1a,Htr2a,Rasgrf1	69	100	13588
GOTERM_BP_FAT	GO:0001963~synaptic transmission, dopaminergic	2	1.66667	0.0345169	0.783878	56.265	1	41.6	13488, 21823	Drd1a,Th	69	7	13588
GOTERM_BP_FAT	GO:0030278~regulation of ossification	3	2.5	0.0288634	0.784058	11.1468	1	36.1386	12311, 14683, 13395	Calcr,Gnas,Dlx5	69	53	13588
GOTERM_BP_FAT	GO:0031175~neuron projection development	4	3.33333	0.0958274	0.787864	3.61335	1	78.6141	17984, 19417, 243725, 13395	Ndn,Rasgrf1,Ppp1r9a,Dlx5	69	218	13588
GOTERM_CC_FAT	GO:0005886~plasma membrane	19	15.8333	0.0345061	0.789188	1.57218	0.990631	33.6746	19882, 223604, 20518, 20519, 241070, 18488, 54160, 13386, 16535, 12311, 13488, 12520, 15558, 69354, 20392, 18400, 26362, 107585, 14683	Mst1r,Kcnk9,Slc22a2,Slc22a3,Gpr1,Cntn3,Copg2,Dlk1,Kcnq1,Calcr,Drd1a,Cd81,Htr2a,Slc38a4,Sgce,Slc22a18,Axl,Dio3,Gnas	52	2906	12504
GOTERM_BP_FAT	GO:0007212~dopamine receptor signaling pathway	2	1.66667	0.0955335	0.79329	19.6928	1	78.5075	13488, 14683	Drd1a,Gnas	69	20	13588
GOTERM_CC_FAT	GO:0031226~intrinsic to plasma membrane	7	5.83333	0.0240773	0.802246	3.04933	0.960893	24.7967	16535, 20518, 20519, 12520, 20392, 26362, 18400	Kcnq1,Slc22a2,Slc22a3,Cd81,Sgce,Axl,Slc22a18	52	552	12504
GOTERM_CC_FAT	GO:0031982~vesicle	6	5	0.0593956	0.803833	2.7799	0.99971	51.1287	16535, 12311, 21823, 16334, 16004, 54160	Kcnq1,Calcr,Th,Ins2,Igf2r,Copg2	52	519	12504
GOTERM_CC_FAT	GO:0042995~cell projection	6	5	0.0839728	0.811088	2.50916	0.999991	64.1406	12311, 21823, 15558, 19417, 14683, 243725	Calcr,Th,Htr2a,Rasgrf1,Gnas,Ppp1r9a	52	575	12504
GOTERM_MF_FAT	GO:0043176~amine binding	3	2.5	0.0272379	0.816174	11.4651	0.993788	28.9229	13488, 21823, 15558	Drd1a,Th,Htr2a	57	61	13288
GOTERM_MF_FAT	GO:0043178~alcohol binding	2	1.66667	0.0454098	0.819172	42.386	0.999807	43.7032	13488, 21823	Drd1a,Th	57	11	13288
GOTERM_MF_FAT	GO:0015101~organic cation transmembrane transporter activity	2	1.66667	0.0454098	0.819172	42.386	0.999807	43.7032	20518, 20519	Slc22a2,Slc22a3	57	11	13288
GOTERM_CC_FAT	GO:0043005~neuron projection	4	3.33333	0.0779543	0.834545	3.9259	0.999979	61.2869	21823, 15558, 19417, 243725	Th,Htr2a,Rasgrf1,Ppp1r9a	52	245	12504
GOTERM_CC_FAT	GO:0031410~cytoplasmic vesicle	6	5	0.0551334	0.848271	2.8401	0.99947	48.4757	16535, 12311, 21823, 16334, 16004, 54160	Kcnq1,Calcr,Th,Ins2,Igf2r,Copg2	52	508	12504
GOTERM_MF_FAT	GO:0004064~arylesterase activity	2	1.66667	0.0208979	0.856724	93.2491	0.979472	22.979	330260, 269823	Pon2,Pon3	57	5	13288
GOTERM_CC_FAT	GO:0005887~integral to plasma membrane	7	5.83333	0.0203281	0.934878	3.16993	0.934878	21.3483	16535, 20518, 20519, 12520, 20392, 26362, 18400	Kcnq1,Slc22a2,Slc22a3,Cd81,Sgce,Axl,Slc22a18	52	531	12504
