# Supplementary material for: A systems-level approach to parental genomic imprinting: the imprinted gene network includes extracellular matrix genes and regulates cell cycle exit and differentiation
Source: HighWire-hosted journal article supplement (doi:10.1101/gr.175919.114), 2015-01-22
Supplement: Table_S3.xlsx [file Table_S3.xlsx]

## Sheet: IG coexp IG_COXPRESdb
Symbol_1	Gene ID_1	Symbol_2	Gene ID_2	Mutual Rank	Cor
Cdkn1c	12577	Igf2	16002	1	0.63
Airn	104103	Igf2r	16004	1	0.64
Meg3	17263	Rian	75745	1	0.63
H19	14955	Igf2	16002	1.7	0.55
Pon3	269823	Pon2	330260	2	0.44
Dlk1	13386	Igf2	16002	2.8	0.53
Igf2	16002	Nnat	18111	6.5	0.48
Cdkn1c	12577	H19	14955	6.9	0.45
Cdkn1c	12577	Nnat	18111	7.3	0.45
Th	21823	Magel2	27385	9.9	0.4
Calcr	12311	Magel2	27385	10.4	0.37
H19	14955	Plagl1	22634	10.5	0.42
Igf2	16002	Zim1	22776	15.3	0.31
Dlk1	13386	Meg3	17263	15.4	0.46
Ipw	16353	Meg3	17263	18.1	0.41
Meg3	17263	Nnat	18111	19.6	0.44
Dlk1	13386	H19	14955	23.4	0.39
Ndn	17984	Ppp1r9a	243725	28	0.43
Meg3	17263	Peg3	18616	28	0.5
Mest	17294	Ndn	17984	28.6	0.49
Cdkn1c	12577	Ndn	17984	34.3	0.49
Tspan32	27027	Peg13	353342	34.6	0.48
Dlk1	13386	Nnat	18111	36.1	0.38
Cdkn1c	12577	Mest	17294	42.4	0.36
Magel2	27385	Usp29	57775	42.8	0.4
Ndn	17984	Nnat	18111	47	0.46
Airn	104103	Plagl1	22634	47	0.34
Meg3	17263	Nap1l5	58243	48.2	0.43
Airn	104103	Kcnq1ot1	63830	49.8	0.43
H19	14955	Nnat	18111	52	0.33
Igf2	16002	Kcnq1ot1	63830	54.6	0.49
Dlx5	13395	Magel2	27385	54.9	0.29
Cdkn1c	12577	Plagl1	22634	55.5	0.35
Meg3	17263	Ndn	17984	56.3	0.52
Zim1	22776	Asb4	65255	58.7	0.23
Mest	17294	Plagl1	22634	58.9	0.34
Ascl2	17173	Sfmbt2	353282	60.9	0.3
Cmah	12763	Tspan32	27027	61.3	0.43
Ndn	17984	Plagl1	22634	66.9	0.43
Ddc	13195	Ndn	17984	68.4	0.53
Airn	104103	Zim1	22776	71	0.26
Nnat	18111	Plagl1	22634	71.2	0.34
Dlk1	13386	Zim1	22776	71.5	0.25
H19	14955	Mest	17294	72.4	0.31
Cdkn1c	12577	Meg3	17263	72.8	0.39
Dlk1	13386	Mest	17294	79.1	0.34
Ndn	17984	Sgce	20392	82.2	0.43
Igf2	16002	Plagl1	22634	87.4	0.35
Impact	16210	Zrsr1	22183	88.9	0.31
Airn	104103	Grb10	14783	89.4	0.36
Magel2	27385	Asb4	65255	92.3	0.25
Meg3	17263	Mest	17294	92.6	0.39
Igf2	16002	Mest	17294	95	0.34
Cdkn1c	12577	Dlk1	13386	98.9	0.32
Dlk1	13386	Asb4	65255	101.6	0.26
Usp29	57775	Kcnq1ot1	63830	106.7	0.48
Airn	104103	Kcnq1	16535	106.9	0.36
Zfp264	116812	Ddc	13195	107.5	0.35
Zim1	22776	Usp29	57775	108.2	0.27
Cdkn1c	12577	Qpct	70536	110.9	0.28
Nnat	18111	Peg3	18616	121.4	0.39
Igf2r	16004	Snrpn	20646	123	0.43
Airn	104103	Igf2	16002	126.8	0.32
Th	21823	Usp29	57775	126.8	0.34
Peg12	27412	Asb4	65255	131.9	0.25
Cntn3	18488	Slc38a4	69354	134.8	0.28
Rasgrf1	19417	Snord116	64243	140.1	0.41
Kcnq1	16535	Kcnq1ot1	63830	141.9	0.48
Grb10	14783	Casd1	213819	142.1	0.43
Cdkn1c	12577	Sgce	20392	153.4	0.32
Dlx5	13395	Meg3	17263	155.8	0.34
Plagl1	22634	Ppp1r9a	243725	157.3	0.32
Igf2	16002	Meg3	17263	157.7	0.39
Dlk1	13386	Plagl1	22634	159.7	0.3
Drd1a	13488	Usp29	57775	170.9	0.31
Dhcr7	13360	Snord116	64243	184.2	0.41
Grb10	14783	Axl	26362	184.5	0.35
Igf2	16002	Asb4	65255	185.5	0.25
Th	21823	Asb4	65255	186.3	0.22
Slc22a18	18400	Slc22a2	20518	188.9	0.5
H19	14955	Ndn	17984	190.6	0.35
Mest	17294	Nnat	18111	191.5	0.28
Slc22a2	20518	Gatm	67092	192.1	0.32
Casd1	213819	Zrsr1	22183	194.9	0.29
Dcn	13179	H19	14955	199.2	0.28
Tbc1d12	209478	Nespas	56802	199.5	0.38
Igf2	16002	Sgce	20392	200	0.32
Dcn	13179	Qpct	70536	201.1	0.26
Grb10	14783	Wt1	22431	201.3	0.31
Airn	104103	Gnas	14683	207.4	0.34
Kcnq1	16535	Slc22a18	18400	208.6	0.44
Gnas	14683	Plagl1	22634	209.3	0.35
Ipw	16353	Cntn3	18488	210.8	0.27
Dlk1	13386	Th	21823	211.3	0.25
Usp29	57775	Nap1l5	58243	212.7	0.35
Mest	17294	Rian	75745	219	0.3
Dlk1	13386	Ndn	17984	223.8	0.39
Dlk1	13386	Sgce	20392	226.9	0.3
Ipw	16353	Nap1l5	58243	230.1	0.28
Dlk1	13386	Qpct	70536	231.2	0.24
Cdkn1c	12577	Osbpl5	79196	231.5	0.26
Wt1	22431	Plagl1	22634	233.7	0.26
Igf2	16002	Peg3	18616	236.8	0.39
Dlk1	13386	Peg3	18616	240.9	0.37
Igf2	16002	Qpct	70536	242.3	0.25
Calcr	12311	Th	21823	248.3	0.21
Peg3	18616	Rian	75745	249	0.39
Dlk1	13386	Magel2	27385	249.6	0.24
Ndn	17984	Peg3	18616	251.2	0.47
Airn	104103	Dlk1	13386	251.2	0.27
Nnat	18111	Peg12	27412	253.7	0.26
Dcn	13179	Plagl1	22634	254.3	0.3
Ddc	13195	Peg3	18616	254.5	0.44
Tfpi2	21789	Gatm	67092	257.2	0.29
Slc22a18	18400	Tfpi2	21789	261.4	0.39
Gnas	14683	Th	21823	262.5	0.32
Ndn	17984	Qpct	70536	266.3	0.3
Meg3	17263	Plagl1	22634	268.8	0.34
Zim1	22776	Magel2	27385	274.6	0.19
Meg3	17263	Rasgrf1	19417	283.6	0.38
Plagl1	22634	Zim1	22776	288.7	0.21
Cd81	12520	Phlda2	22113	302.1	0.27
Meg3	17263	Th	21823	302.9	0.31
Meg3	17263	Magel2	27385	305.1	0.31
Nnat	18111	Rian	75745	312.3	0.29
Igf2	16002	Ndn	17984	315	0.39
Cd81	12520	Peg3	18616	320.9	0.33
Cdkn1c	12577	Peg3	18616	338.7	0.33
Nnat	18111	Sgce	20392	342.5	0.28
Dcn	13179	Pon3	269823	347.9	0.26
Dcn	13179	Dlk1	13386	351.4	0.27
Dcn	13179	Meg3	17263	351.5	0.36
Wt1	22431	Kcnq1ot1	63830	359.7	0.31
Nnat	18111	Qpct	70536	360.3	0.23
Ppp1r9a	243725	Snord116	64243	363.1	0.32
Sgce	20392	Pde4d	238871	371.5	0.32
Wt1	22431	Zim1	22776	376.8	0.19
Cd81	12520	Grb10	14783	384.1	0.3
H19	14955	Meg3	17263	391.2	0.3
Slc22a2	20518	Snrpn	20646	393.7	0.39
Dlk1	13386	Rian	75745	396.2	0.27
Rasgrf1	19417	Nap1l5	58243	397.1	0.31
Scin	20259	Slc22a2	20518	407.3	0.26
Scin	20259	Gatm	67092	410.8	0.23
Zim3	116811	Meg3	17263	412.6	0.41
Dcn	13179	Mst1r	19882	414.3	0.24
Usp29	57775	Asb4	65255	421.3	0.24
Nnat	18111	Magel2	27385	422.4	0.21
Grb10	14783	Ndn	17984	425.6	0.42
Tfpi2	21789	Slc38a4	69354	427.5	0.24
Zim3	116811	Usp29	57775	430.1	0.41
Ppp1r9a	243725	Nap1l5	58243	430.6	0.27
Art5	11875	Cobl	12808	433.7	0.35
Cdkn1c	12577	Dcn	13179	436.4	0.26
Nnat	18111	Th	21823	437.3	0.22
Airn	104103	Meg3	17263	437.6	0.31
Dlx5	13395	Nap1l5	58243	439.8	0.19
Ppp1r9a	243725	Asb4	65255	444	0.23
Peg10	170676	Sgce	20392	447.8	0.27
Grb10	14783	Rian	75745	450.7	0.33
Dhcr7	13360	Snrpn	20646	456.2	0.37
H13	14950	Snord116	64243	458.6	0.35
Kcnq1	16535	Usp29	57775	459.3	0.36
Dcn	13179	Igf2	16002	470.9	0.27
Grb10	14783	Mest	17294	473.5	0.29
Nap1l5	58243	Qpct	70536	474.1	0.21
Igf2r	16004	Peg3	18616	480.5	0.4
Commd1	17846	Mcts2	66405	484.5	0.28
Cd81	12520	Rian	75745	486.1	0.26
Slc22a2	20518	Tfpi2	21789	487	0.3
Mkrn3	22652	Nap1l5	58243	488.9	0.21
Mest	17294	Ppp1r9a	243725	489	0.26
Kcnq1ot1	63830	Snord116	64243	489.8	0.43
Gnas	14683	Wt1	22431	491.3	0.28
Nnat	18111	Asb4	65255	495.9	0.2
Ipw	16353	Usp29	57775	507.9	0.27
Pon2	330260	Qpct	70536	508.5	0.25
Nap1l4	17955	Tssc4	56844	515.6	0.32
Scin	20259	Gpr1	241070	521.2	0.21
Mest	17294	Sgce	20392	524.2	0.25
Pon3	269823	Qpct	70536	526	0.2
Grb10	14783	Peg3	18616	526.4	0.38
Calcr	12311	Asb4	65255	529.6	0.17
Meg3	17263	Ppp1r9a	243725	529.9	0.32
Cd81	12520	Mest	17294	539.8	0.23
Gnas	14683	Magel2	27385	541.4	0.28
Dlx5	13395	Usp29	57775	548	0.23
Ndn	17984	Nap1l5	58243	555.4	0.33
Ascl2	17173	Phlda2	22113	565.9	0.25
Ddc	13195	Th	21823	572.2	0.26
Meg3	17263	Qpct	70536	578	0.26
Nnat	18111	Snrpn	20646	582	0.3
Nnat	18111	Nap1l5	58243	582.3	0.23
Mest	17294	Peg3	18616	582.4	0.3
Igf2as	111975	Zim1	22776	598.5	0.21
Cntn3	18488	Mkrn3	22652	599.2	0.2
Dhcr7	13360	Igf2r	16004	605.2	0.36
Gnas	14683	Kcnq1ot1	63830	609.7	0.4
Art5	11875	Tbc1d12	209478	611.4	0.39
Cobl	12808	Phlda2	22113	612.6	0.26
Cdkn1c	12577	Zim1	22776	615.6	0.18
Meg3	17263	Sgce	20392	618.3	0.32
Cdkn1c	12577	Grb10	14783	630	0.27
Cd81	12520	Impact	16210	641.4	0.26
Ipw	16353	Magel2	27385	642.3	0.19
Plagl1	22634	Qpct	70536	644.4	0.21
Grb10	14783	Plagl1	22634	645.8	0.28
Ndn	17984	Rian	75745	650.8	0.34
Dlx5	13395	Ipw	16353	652.4	0.17
Dlk1	13386	Axl	26362	663.3	0.23
Igf2r	16004	Tbc1d12	209478	665.8	0.38
Ndn	17984	Pde4d	238871	667.3	0.35
Peg3	18616	Zim1	22776	670.3	0.21
Dlk1	13386	Grb10	14783	674.3	0.26
Gnas	14683	Zim1	22776	691.5	0.21
Impact	16210	Meg3	17263	692.7	0.33
Tbc1d12	209478	Peg13	353342	701.4	0.37
Calcr	12311	Dlx5	13395	701.5	0.13
Grb10	14783	Asb4	65255	706.5	0.22
Ascl2	17173	Tbc1d12	209478	709	0.29
Dlx5	13395	Th	21823	718.5	0.16
Impact	16210	Sgce	20392	722.8	0.27
Gnas	14683	Peg3	18616	730.3	0.37
Slc22a18	18400	Gatm	67092	751.9	0.27
Tbc1d12	209478	Zim2	76637	755.5	0.33
H19	14955	Qpct	70536	759.1	0.17
H13	14950	Mkrn3	22652	759.5	0.23
Ampd3	11717	Scin	20259	767.1	0.19
Ndn	17984	Peg12	27412	772.6	0.27
Sgce	20392	Qpct	70536	777.9	0.21
Ipw	16353	Th	21823	780.9	0.19
Wt1	22431	Ppp1r9a	243725	787.1	0.22
Plagl1	22634	Rian	75745	792.4	0.24
Igf2as	111975	Nespas	56802	793.3	0.32
Grb10	14783	Igf2	16002	795.4	0.27
Ascl2	17173	Slc22a18	18400	795.8	0.28
Zim3	116811	Kcnq1ot1	63830	796.3	0.42
Peg3	18616	Axl	26362	800.3	0.29
Rasgrf1	19417	Zim2	76637	800.8	0.3
Igf2as	111975	Trappc9	76510	802.6	0.31
Zfp264	116812	Peg3	18616	806.5	0.25
Airn	104103	H19	14955	814.8	0.2
Peg10	170676	Slc22a3	20519	823.5	0.17
Dlx5	13395	Drd1a	13488	824.5	0.14
Impact	16210	Qpct	70536	828.6	0.21
Igf2as	111975	Igf2	16002	831.4	0.29
H19	14955	Mst1r	19882	833.6	0.18
Meg3	17263	Usp29	57775	833.8	0.34
Rasgrf1	19417	Snrpn	20646	848	0.33
Gnas	14683	Osbpl5	79196	852.2	0.26
Plagl1	22634	Gatm	67092	856.8	0.21
Igf2r	16004	Zim2	76637	859.6	0.32
Nap1l4	17955	Blcap	53619	861.6	0.27
Cdkn1c	12577	Mst1r	19882	869.5	0.19
Ndn	17984	Casd1	213819	875	0.36
Drd1a	13488	Kcnq1	16535	880.4	0.24
Igf2as	111975	Gnas	14683	883.6	0.35
Slc22a18	18400	Scin	20259	890.2	0.26
Zim3	116811	Pde4d	238871	895.2	0.34
Peg3	18616	Ppp1r9a	243725	896	0.3
Snrpn	20646	Rian	75745	900.8	0.31
Ins2	16334	Tspan32	27027	912.1	0.3
Cdkn1c	12577	Phlda2	22113	914.3	0.21
Tbc1d12	209478	Tspan32	27027	919	0.36
Igf2as	111975	Igf2r	16004	920	0.35
Ndn	17984	Zim1	22776	921	0.2
Dcn	13179	Ndn	17984	922.9	0.3
Ins2	16334	Pde4d	238871	928.2	0.29
Snrpn	20646	Zim2	76637	929.3	0.32
Grb10	14783	Ppp1r9a	243725	931.9	0.27
Art5	11875	Asb4	65255	934.6	0.22
Scin	20259	Tfpi2	21789	942.4	0.19
Cdkn1c	12577	Impact	16210	942.8	0.23
Dlk1	13386	Wt1	22431	947.8	0.17
Igf2as	111975	Ascl2	17173	949.9	0.27
Slc22a18	18400	Snrpn	20646	950.7	0.35
Igf2	16002	Ppp1r9a	243725	960.5	0.24
Gnas	14683	Igf2	16002	964.3	0.29
H19	14955	Sgce	20392	971.3	0.2
Kcnq1	16535	Mst1r	19882	976.5	0.24
Peg10	170676	Asb4	65255	987	0.16
Casd1	213819	Ppp1r9a	243725	988.4	0.28
Cdkn1c	12577	Rian	75745	992.9	0.21
Cdkn1c	12577	Asb4	65255	1003.8	0.17
Ascl2	17173	Tspan32	27027	1008.3	0.27
Igf2	16002	Usp29	57775	1016.5	0.25
Scin	20259	Phlda2	22113	1023.2	0.19
Commd1	17846	Ube3a	22215	1027	0.32
Th	21823	Zim1	22776	1032.7	0.16
Slc22a18	18400	Tspan32	27027	1038.2	0.34
Igf2r	16004	Rian	75745	1038.4	0.3
Peg10	170676	Mest	17294	1040.7	0.18
Phlda2	22113	Tssc4	56844	1043	0.22
Gnas	14683	Kcnq1	16535	1044.5	0.34
Grb10	14783	Impact	16210	1045.2	0.28
Commd1	17846	Nap1l4	17955	1045.5	0.32
Igf2	16002	Wt1	22431	1052.7	0.19
Kcnq1	16535	Ube3a	22215	1059.6	0.32
Cntn3	18488	Pon3	269823	1062.5	0.18
Asb4	65255	Slc38a4	69354	1062.6	0.16
Cd81	12520	Axl	26362	1063.9	0.22
Drd1a	13488	Kcnq1ot1	63830	1065.9	0.25
Peg3	18616	Asb4	65255	1066.3	0.22
Gatm	67092	Qpct	70536	1070	0.16
Airn	104103	Pon3	269823	1077.8	0.19
Slc22a2	20518	Phlda2	22113	1080.4	0.21
Cd81	12520	Gnas	14683	1080.8	0.27
Ndn	17984	Asb4	65255	1094.6	0.21
Magel2	27385	Nap1l5	58243	1094.7	0.17
Ndn	17984	Magel2	27385	1095.9	0.23
Cdkn1c	12577	Ppp1r9a	243725	1096.6	0.22
Snrpn	20646	Snord116	64243	1097.1	0.34
Wt1	22431	Osbpl5	79196	1107.9	0.17
Cd81	12520	Casd1	213819	1108.8	0.25
Mst1r	19882	Qpct	70536	1111.3	0.17
Th	21823	Nap1l5	58243	1113.7	0.17
Cd81	12520	Ndn	17984	1118	0.27
Ampd3	11717	Blcap	53619	1122.5	0.2
Ube3a	22215	Copg2	54160	1124.1	0.28
Cobl	12808	Snord116	64243	1127.2	0.27
Cd81	12520	Ppp1r9a	243725	1127.3	0.22
Calcr	12311	Tfpi2	21789	1132.6	0.14
Igf2as	111975	Zim3	116811	1133.7	0.35
Ddc	13195	Pon2	330260	1136.7	0.29
Cobl	12808	Ppp1r9a	243725	1140.8	0.25
Ndn	17984	Cntn3	18488	1141.6	0.25
Slc22a18	18400	Peg13	353342	1142	0.34
Slc38a4	69354	Qpct	70536	1142.5	0.16
Kcnq1	16535	Ascl2	17173	1146	0.26
Grb10	14783	H19	14955	1150.5	0.2
Impact	16210	Peg3	18616	1152	0.3
Igf2as	111975	Dlk1	13386	1156.6	0.24
Mst1r	19882	Pon3	269823	1160.9	0.17
Copg2	54160	Rian	75745	1161.8	0.24
Cd81	12520	Cdkn1c	12577	1163.7	0.19
Plagl1	22634	Kcnq1ot1	63830	1166.9	0.28
Mest	17294	Casd1	213819	1170.5	0.24
Ddc	13195	Magel2	27385	1190.6	0.21
Mst1r	19882	Pon2	330260	1197.8	0.21
Nap1l4	17955	Copg2	54160	1199.2	0.28
