# Supplementary material for: A systems-level approach to parental genomic imprinting: the imprinted gene network includes extracellular matrix genes and regulates cell cycle exit and differentiation
Source: HighWire-hosted journal article supplement (doi:10.1101/gr.175919.114), 2015-01-22
Supplement: Table_S4.xlsx [file Table_S4.xlsx]

## Sheet: Gemma
Query Symbol	Query Gene ID	Coexpressed Symbol	Coexpressed Gene ID	PositiveSupport	NegativeSupport	Support	NumberofDatasetsTestedIn
Rian	75745	Meg3	17263	54	0	54	488
Igf2	16002	H19	14955	48	0	48	611
Mirg	100040724	Meg3	17263	33	0	33	390
Meg3	17263	Dlk1	13386	32	0	32	713
Igf2	16002	Cdkn1c	12577	27	0	27	699
Ndn	17984	Grb10	14783	23	0	23	728
Sgce	20392	Ndn	17984	21	0	21	666
Ndn	17984	Meg3	17263	20	0	20	725
Meg3	17263	AF357355	100303646	19	0	19	232
Meg3	17263	H19	14955	17	0	17	579
Peg3	18616	Meg3	17263	17	0	17	695
Plagl1	22634	Igf2	16002	17	0	17	659
Plagl1	22634	Mest	17294	17	0	17	648
H19	14955	Cdkn1c	12577	16	0	16	558
Meg3	17263	Cdkn1c	12577	16	0	16	683
Plagl1	22634	Meg3	17263	16	0	16	680
Meg3	17263	Grb10	14783	15	0	15	752
Dcn	13179	Axl	26362	15	0	15	619
Igf2r	16004	Airn	104103	15	0	15	563
Ndn	17984	H19	14955	14	0	14	569
Plagl1	22634	Dlk1	13386	14	0	14	609
Plagl1	22634	Grb10	14783	14	0	14	654
Rian	75745	AF357355	100303646	14	0	14	204
Mest	17294	Dlk1	13386	13	0	13	674
Mest	17294	Grb10	14783	13	0	13	715
Mest	17294	Meg3	17263	13	0	13	718
Grb10	14783	Cdkn1c	12577	12	0	12	688
Igf2	16002	Dlk1	13386	12	0	12	711
Peg3	18616	Cdkn1c	12577	12	0	12	639
Peg3	18616	Mest	17294	12	0	12	685
Snrpn	20646	Meg3	17263	12	0	12	653
Slc38a4	69354	H19	14955	12	0	12	481
Snurf	84704	Meg3	17263	12	0	12	653
Ndn	17984	Dcn	13179	11	0	11	724
Ndn	17984	Dlk1	13386	11	0	11	674
Mest	17294	H19	14955	11	0	11	568
Peg3	18616	Grb10	14783	11	0	11	697
Plagl1	22634	Ndn	17984	11	0	11	647
Igf2r	16004	Cdkn1c	12577	10	0	10	723
Igf2	16002	Dcn	13179	10	0	10	761
Igf2	16002	Grb10	14783	10	0	10	759
Meg3	17263	Igf2	16002	10	0	10	753
Mest	17294	Igf2	16002	10	0	10	727
Ndn	17984	Impact	16210	10	0	10	718
Peg3	18616	Igf2	16002	10	0	10	700
Ndn	17984	Mest	17294	10	0	10	710
Nap1l5	58243	Impact	16210	10	0	10	434
Rian	75745	Mirg	100040724	10	0	10	327
H13	14950	Gnas	14683	9	0	9	825
Mest	17294	Cdkn1c	12577	9	0	9	666
Ndn	17984	Cdkn1c	12577	9	0	9	683
Igf2r	16004	Grb10	14783	9	0	9	784
Peg3	18616	Dlk1	13386	9	0	9	650
Sgce	20392	Cdkn1c	12577	9	0	9	642
Nnat	18111	Ndn	17984	9	0	9	574
Snrpn	20646	Ndn	17984	9	0	9	630
Plagl1	22634	Peg3	18616	9	0	9	615
Ndn	17984	Nap1l5	58243	9	0	9	404
Snurf	84704	Ndn	17984	9	0	9	630
Ppp1r9a	243725	Ndn	17984	9	0	9	518
Dcn	13179	Cdkn1c	12577	8	0	8	692
Dlk1	13386	Cdkn1c	12577	8	0	8	652
Gnas	14683	Dcn	13179	8	0	8	776
Meg3	17263	Gnas	14683	8	0	8	776
Igf2r	16004	Igf2	16002	8	0	8	803
Peg3	18616	Igf2r	16004	8	0	8	717
Plagl1	22634	Cdkn1c	12577	8	0	8	598
Rasgrf1	19417	Impact	16210	8	0	8	640
Rasgrf1	19417	Meg3	17263	8	0	8	630
Plagl1	22634	Igf2r	16004	8	0	8	681
Ppp1r9a	243725	Meg3	17263	8	0	8	528
Meg3	17263	Copg2as2	100044236	8	0	8	342
Dlk1	13386	Ddc	13195	7	0	7	617
Gnas	14683	Cd81	12520	7	0	7	796
Grb10	14783	Dcn	13179	7	0	7	743
Gnas	14683	Dlk1	13386	7	0	7	725
Grb10	14783	Dlk1	13386	7	0	7	692
Nnat	18111	Dcn	13179	7	0	7	595
Sgce	20392	Dcn	13179	7	0	7	697
Sgce	20392	Igf2	16002	7	0	7	699
Slc38a4	69354	Grb10	14783	7	0	7	560
Meg3	17263	Airn	104103	7	0	7	591
Pon2	330260	H13	14950	7	0	7	816
Dlk1	13386	Dcn	13179	6	0	6	693
H19	14955	Dlk1	13386	6	0	6	571
H19	14955	Gnas	14683	6	0	6	624
Nnat	18111	H13	14950	6	0	6	613
Mest	17294	Igf2r	16004	6	0	6	754
Th	21823	Ddc	13195	6	0	6	505
Peg3	18616	Ndn	17984	6	0	6	677
Plagl1	22634	H19	14955	6	0	6	516
Sgce	20392	Mest	17294	6	0	6	661
Slc22a2	20518	Slc22a18	18400	6	0	6	336
Snrpn	20646	Slc22a18	18400	6	0	6	529
Wt1	22431	Meg3	17263	6	0	6	389
Magel2	27385	Dlk1	13386	6	0	6	508
Igf2	16002	Axl	26362	6	0	6	634
Axl	26362	Ndn	17984	6	0	6	599
Blcap	53619	Ndn	17984	6	0	6	743
Usp29	57775	Grb10	14783	6	0	6	310
Mcts2	66405	Commd1	17846	6	0	6	594
Gatm	67092	Ndn	17984	6	0	6	640
Tfpi2	21789	Slc38a4	69354	6	0	6	317
Slc38a4	69354	Plagl1	22634	6	0	6	479
Snurf	84704	Slc22a18	18400	6	0	6	529
Snrpn	20646	Ppp1r9a	243725	6	0	6	522
Snurf	84704	Ppp1r9a	243725	6	0	6	522
Ppp1r9a	243725	Airn	104103	6	0	6	472
Pon3	269823	Pon2	330260	6	0	6	629
Mirg	100040724	Dlk1	13386	6	0	6	348
Mest	17294	Copg2as2	100044236	6	0	6	330
Peg3	18616	AF357355	100303646	6	0	6	225
Cdkn1c	12577	Gnas	14683	5	0	5	713
Cd81	12520	Grb10	14783	5	0	5	762
Ddc	13195	Grb10	14783	5	0	5	657
H19	14955	Dcn	13179	5	0	5	604
Igf2	16002	Cd81	12520	5	0	5	773
Igf2r	16004	Dlk1	13386	5	0	5	730
Ddc	13195	Ndn	17984	5	0	5	632
Ddc	13195	Slc22a18	18400	5	0	5	569
Mest	17294	Gnas	14683	5	0	5	744
Igf2r	16004	Meg3	17263	5	0	5	776
Sgce	20392	H19	14955	5	0	5	561
Wt1	22431	Dlk1	13386	5	0	5	385
Ins2	16334	Snrpn	20646	5	0	5	420
Sgce	20392	Meg3	17263	5	0	5	709
Zrsr1	22183	Rasgrf1	19417	5	0	5	622
Magel2	27385	Ndn	17984	5	0	5	526
Tssc4	56844	Ins2	16334	5	0	5	534
Dlk1	13386	Asb4	65255	5	0	5	353
Asb4	65255	Gnas	14683	5	0	5	395
Gatm	67092	Grb10	14783	5	0	5	657
Slc38a4	69354	Dlk1	13386	5	0	5	516
Slc38a4	69354	Igf2	16002	5	0	5	560
Slc38a4	69354	Meg3	17263	5	0	5	551
Slc38a4	69354	Mest	17294	5	0	5	527
Th	21823	Asb4	65255	5	0	5	269
Slc38a4	69354	Slc22a18	18400	5	0	5	504
Tfpi2	21789	Gatm	67092	5	0	5	345
Rian	75745	Dlk1	13386	5	0	5	426
Sgce	20392	Qpct	70536	5	0	5	443
Rian	75745	Peg3	18616	5	0	5	421
Ins2	16334	Snurf	84704	5	0	5	420
Osbpl5	79196	Axl	26362	5	0	5	551
Airn	104103	Ndn	17984	5	0	5	534
Plagl1	22634	Airn	104103	5	0	5	541
Igf2as	111975	Snrpn	20646	5	0	5	415
Igf2as	111975	Snurf	84704	5	0	5	415
Tbc1d12	209478	Grb10	14783	5	0	5	489
Ppp1r9a	243725	Grb10	14783	5	0	5	524
Sgce	20392	Ppp1r9a	243725	5	0	5	469
Pon2	330260	Igf2r	16004	5	0	5	813
Tfpi2	21789	Sfmbt2	353282	5	0	5	208
Pon2	330260	Blcap	53619	5	0	5	784
Dhcr7	13360	H13	14950	4	0	4	775
Cmah	12763	Igf2r	16004	4	0	4	556
Calcr	12311	Meg3	17263	4	0	4	196
Igf2	16002	Gnas	14683	4	0	4	794
Peg3	18616	Ddc	13195	4	0	4	600
Kcnq1	16535	Igf2	16002	4	0	4	552
Kcnq1	16535	Ins2	16334	4	0	4	415
Impact	16210	Meg3	17263	4	0	4	739
Dlk1	13386	Sgce	20392	4	0	4	648
Nnat	18111	Igf2	16002	4	0	4	597
Phlda2	22113	Cdkn1c	12577	4	0	4	450
Ins2	16334	Slc22a18	18400	4	0	4	522
Sgce	20392	Grb10	14783	4	0	4	705
Th	21823	Dlk1	13386	4	0	4	563
Nnat	18111	Meg3	17263	4	0	4	590
Nnat	18111	Mest	17294	4	0	4	583
Wt1	22431	Dcn	13179	4	0	4	420
Plagl1	22634	Dcn	13179	4	0	4	655
Kcnq1	16535	Snrpn	20646	4	0	4	494
Rasgrf1	19417	Nnat	18111	4	0	4	507
Zrsr1	22183	Impact	16210	4	0	4	743
Nnat	18111	Snrpn	20646	4	0	4	499
Cdkn1c	12577	Axl	26362	4	0	4	564
Peg3	18616	Sgce	20392	4	0	4	651
Zrsr1	22183	Meg3	17263	4	0	4	752
Tspan32	27027	Cmah	12763	4	0	4	453
Rasgrf1	19417	Snrpn	20646	4	0	4	604
Phlda2	22113	Slc22a18	18400	4	0	4	482
Zim1	22776	Peg3	18616	4	0	4	158
Magel2	27385	H19	14955	4	0	4	420
Magel2	27385	Slc22a18	18400	4	0	4	454
Blcap	53619	H13	14950	4	0	4	815
Usp29	57775	Impact	16210	4	0	4	310
Peg3	18616	Nap1l5	58243	4	0	4	403
Rasgrf1	19417	Nap1l5	58243	4	0	4	399
Asb4	65255	Grb10	14783	4	0	4	377
Asb4	65255	Meg3	17263	4	0	4	392
Ddc	13195	Slc38a4	69354	4	0	4	505
Mest	17294	Gatm	67092	4	0	4	617
Usp29	57775	Magel2	27385	4	0	4	280
Peg3	18616	Slc38a4	69354	4	0	4	518
Qpct	70536	Ndn	17984	4	0	4	458
Osbpl5	79196	Dcn	13179	4	0	4	690
Gatm	67092	Axl	26362	4	0	4	513
Rian	75745	Sgce	20392	4	0	4	432
Kcnq1	16535	Snurf	84704	4	0	4	494
Nnat	18111	Snurf	84704	4	0	4	499
Rasgrf1	19417	Snurf	84704	4	0	4	604
Kcnq1	16535	Airn	104103	4	0	4	427
H19	14955	Casd1	213819	4	0	4	449
Rasgrf1	19417	Pde4d	238871	4	0	4	509
Rasgrf1	19417	Ppp1r9a	243725	4	0	4	507
Pon3	269823	Commd1	17846	4	0	4	528
Pon2	330260	Ndn	17984	4	0	4	751
Qpct	70536	Pon2	330260	4	0	4	486
Mirg	100040724	Gnas	14683	4	0	4	355
Mirg	100040724	AF357355	100303646	4	0	4	172
Ddc	13195	Cd81	12520	3	0	3	658
Ddc	13195	Cdkn1c	12577	3	0	3	593
Drd1a	13488	Dlx5	13395	3	0	3	224
Ddc	13195	Meg3	17263	3	0	3	659
Nnat	18111	Cd81	12520	3	0	3	592
Ampd3	11717	Rasgrf1	19417	3	0	3	581
Nnat	18111	Dlk1	13386	3	0	3	567
Rasgrf1	19417	Dlk1	13386	3	0	3	576
Nnat	18111	H19	14955	3	0	3	487
Scin	20259	Ddc	13195	3	0	3	456
Wt1	22431	Ampd3	11717	3	0	3	384
Tfpi2	21789	Cdkn1c	12577	3	0	3	340
Peg3	18616	Impact	16210	3	0	3	682
Wt1	22431	Cdkn1c	12577	3	0	3	377
Slc22a3	20519	Grb10	14783	3	0	3	384
Ascl2	17173	Slc22a18	18400	3	0	3	468
Th	21823	Gnas	14683	3	0	3	589
Ipw	16353	Snrpn	20646	3	0	3	134
Mest	17294	Snrpn	20646	3	0	3	629
Zim1	22776	Igf2	16002	3	0	3	164
Tfpi2	21789	Mest	17294	3	0	3	346
Phlda2	22113	Ascl2	17173	3	0	3	385
Phlda2	22113	Meg3	17263	3	0	3	469
Magel2	27385	Calcr	12311	3	0	3	178
Wt1	22431	Ndn	17984	3	0	3	393
Magel2	27385	Ddc	13195	3	0	3	509
Plagl1	22634	Nnat	18111	3	0	3	532
Peg3	18616	Ube3a	22215	3	0	3	715
Slc22a2	20518	Phlda2	22113	3	0	3	279
Peg12	27412	Ndn	17984	3	0	3	229
Zim1	22776	Plagl1	22634	3	0	3	165
Blcap	53619	Cd81	12520	3	0	3	781
Tssc4	56844	Cd81	12520	3	0	3	766
Usp29	57775	Drd1a	13488	3	0	3	202
Tssc4	56844	Nap1l4	17955	3	0	3	637
Nap1l5	58243	Meg3	17263	3	0	3	440
Usp29	57775	Ndn	17984	3	0	3	285
Asb4	65255	Art5	11875	3	0	3	286
Asb4	65255	Igf2	16002	3	0	3	374
Asb4	65255	Ndn	17984	3	0	3	363
Nnat	18111	Asb4	65255	3	0	3	324
Gatm	67092	Meg3	17263	3	0	3	664
Qpct	70536	Grb10	14783	3	0	3	485
Qpct	70536	Meg3	17263	3	0	3	472
Rian	75745	Cdkn1c	12577	3	0	3	399
Rian	75745	Igf2	16002	3	0	3	444
Cobl	12808	Snurf	84704	3	0	3	474
Dlk1	13386	Snurf	84704	3	0	3	581
Ipw	16353	Snurf	84704	3	0	3	134
Wt1	22431	Osbpl5	79196	3	0	3	386
Usp29	57775	Blcap	53619	3	0	3	305
Igf2as	111975	Igf2	16002	3	0	3	418
Igf2as	111975	Meg3	17263	3	0	3	424
Asb4	65255	Slc38a4	69354	3	0	3	326
Rian	75745	Airn	104103	3	0	3	444
Cobl	12808	Ppp1r9a	243725	3	0	3	477
Drd1a	13488	Ppp1r9a	243725	3	0	3	293
Peg12	27412	Ppp1r9a	243725	3	0	3	217
Nap1l5	58243	Casd1	213819	3	0	3	371
Asb4	65255	Casd1	213819	3	0	3	318
Rian	75745	Ppp1r9a	243725	3	0	3	374
Sfmbt2	353282	H19	14955	3	0	3	362
Sfmbt2	353282	Phlda2	22113	3	0	3	310
Mir127	387146	Meg3	17263	3	0	3	35
Pde4d	238871	Ppp1r9a	243725	3	0	3	527
Peg12	27412	Klf14	619665	3	0	3	69
Mir134	387152	Mir127	387146	3	0	3	27
Nnat	18111	Mirg	100040724	3	0	3	265
Copg2as2	100044236	Grb10	14783	3	0	3	338
Peg3	18616	Mirg	100040724	3	0	3	337
Copg2as2	100044236	Ndn	17984	3	0	3	337
Plagl1	22634	Mirg	100040724	3	0	3	350
Mirg	100040724	Asb4	65255	3	0	3	199
Mirg	100040724	Airn	104103	3	0	3	368
AF357355	100303646	Gnas	14683	3	0	3	222
AF357355	100303646	Impact	16210	3	0	3	229
Calcr	12311	Ampd3	11717	2	0	2	181
Dlx5	13395	Cdkn1c	12577	2	0	2	389
Drd1a	13488	Grb10	14783	2	0	2	301
Dlx5	13395	H13	14950	2	0	2	446
Dlx5	13395	Ndn	17984	2	0	2	412
Drd1a	13488	Rasgrf1	19417	2	0	2	290
Cntn3	18488	Grb10	14783	2	0	2	300
Drd1a	13488	Plagl1	22634	2	0	2	285
Cntn3	18488	Ndn	17984	2	0	2	281
Slc22a3	20519	Meg3	17263	2	0	2	386
Slc22a3	20519	Ndn	17984	2	0	2	351
Zim1	22776	Igf2r	16004	2	0	2	166
Scin	20259	Rasgrf1	19417	2	0	2	401
Zim1	22776	Meg3	17263	2	0	2	175
Drd1a	13488	Tspan32	27027	2	0	2	256
Mkrn3	22652	Nnat	18111	2	0	2	244
Slc22a2	20518	Snrpn	20646	2	0	2	249
Magel2	27385	Grb10	14783	2	0	2	553
Peg12	27412	Grb10	14783	2	0	2	255
Peg12	27412	H19	14955	2	0	2	214
Slc22a3	20519	Plagl1	22634	2	0	2	354
Phlda2	22113	Wt1	22431	2	0	2	308
Magel2	27385	Meg3	17263	2	0	2	554
Wt1	22431	Plagl1	22634	2	0	2	359
Peg12	27412	Magel2	27385	2	0	2	212
Usp29	57775	Ddc	13195	2	0	2	294
Blcap	53619	Nnat	18111	2	0	2	599
Nespas	56802	Ascl2	17173	2	0	2	132
Calcr	12311	Asb4	65255	2	0	2	162
Nap1l5	58243	Snrpn	20646	2	0	2	414
Kcnq1ot1	63830	Meg3	17263	2	0	2	111
Osbpl5	79196	Cd81	12520	2	0	2	685
Zdbf2	73884	Peg3	18616	2	0	2	126
Magel2	27385	Asb4	65255	2	0	2	336
Peg12	27412	Asb4	65255	2	0	2	206
Rian	75745	Plagl1	22634	2	0	2	431
Slc22a2	20518	Snurf	84704	2	0	2	249
Phlda2	22113	Snurf	84704	2	0	2	384
Tspan32	27027	Snurf	84704	2	0	2	506
Usp29	57775	Nap1l5	58243	2	0	2	266
Kcnq1ot1	63830	Usp29	57775	2	0	2	78
Usp29	57775	Asb4	65255	2	0	2	213
Igf2as	111975	Cdkn1c	12577	2	0	2	365
Igf2as	111975	H19	14955	2	0	2	307
Zim3	116811	Ins2	16334	2	0	2	250
Igf2as	111975	Magel2	27385	2	0	2	359
Nap1l5	58243	Snurf	84704	2	0	2	414
Qpct	70536	Snurf	84704	2	0	2	464
Igf2as	111975	Asb4	65255	2	0	2	210
Peg10	170676	Igf2	16002	2	0	2	248
Peg10	170676	Slc38a4	69354	2	0	2	223
Peg12	27412	Casd1	213819	2	0	2	245
Gpr1	241070	H19	14955	2	0	2	256
Dlx5	13395	Ppp1r9a	243725	2	0	2	352
Cntn3	18488	Ppp1r9a	243725	2	0	2	262
Fbxo40	207215	Trappc9	76510	2	0	2	72
Klrb1f	232408	Usp29	57775	2	0	2	133
Peg13	353342	Plagl1	22634	2	0	2	48
Mir134	387152	Meg3	17263	2	0	2	27
Kcnq1ot1	63830	Sfmbt2	353282	2	0	2	95
Peg10	170676	Sfmbt2	353282	2	0	2	194
Copg2as2	100044236	Dlk1	13386	2	0	2	294
Mirg	100040724	Mest	17294	2	0	2	350
Copg2as2	100044236	Gnas	14683	2	0	2	331
Copg2as2	100044236	Igf2	16002	2	0	2	328
Copg2as2	100044236	Peg3	18616	2	0	2	312
Copg2as2	100044236	Slc22a3	20519	2	0	2	210
Peg3as	100169889	Grb10	14783	2	0	2	65
Copg2as2	100044236	Pde4d	238871	2	0	2	260
AF357355	100303646	Cdkn1c	12577	2	0	2	218
AF357355	100303646	Sgce	20392	2	0	2	228
AF357355	100303646	Tfpi2	21789	2	0	2	107
AF357355	100303646	Plagl1	22634	2	0	2	225
AF357355	100303646	Airn	104103	2	0	2	219
Mir433	723937	AF357355	100303646	2	0	2	19
Rasgrf1	19417	Ndn	17984	0	2	-2	612
Zim1	22776	Impact	16210	0	2	-2	161
Phlda2	22113	Ndn	17984	0	2	-2	444
Mkrn3	22652	Rasgrf1	19417	0	2	-2	256
Peg12	27412	Zrsr1	22183	0	2	-2	256
Igf2as	111975	Blcap	53619	0	2	-2	409
Mirg	100040724	Pon2	330260	0	2	-2	357
Cobl	12808	Nnat	18111	0	3	-3	405
Zrsr1	22183	Ndn	17984	0	3	-3	732
Copg2	54160	Gnas	14683	0	3	-3	656
Osbpl5	79196	H13	14950	0	3	-3	710
