# Supplementary material for: A systems-level approach to parental genomic imprinting: the imprinted gene network includes extracellular matrix genes and regulates cell cycle exit and differentiation
Source: HighWire-hosted journal article supplement (doi:10.1101/gr.175919.114), 2015-01-22
Supplement: Table_S5.xlsx [file Table_S5.xlsx]

## Sheet: Table S5
Symbol	Gene ID	Alias	Chromosome	Start	End	Strand	Cytoband	Status (GeneImprint)	Expressed allele
TP73	7161	P73	1	3569129	3652765	+	1p36.3	Imprinted	Maternal
DIRAS3	9077	ARHI, NOEY2	1	68511645	68516460	-	1p31	Imprinted	Paternal
NAP1L5	266812	DRLM	4	89617066	89619023	-	4q22.1	Imprinted	Paternal
PLAGL1	5325	ZAC, LOT1, ZAC1, MGC126275, MGC126276, DKFZp781P1017	6	144261437	144385735	-	6q24-q25	Imprinted	Paternal
HYMAI	57061	NCRNA00020	6	144324023	144329867	-	6q24.2	Imprinted	Paternal
SLC22A2	6582	OCT2, MGC32628	6	160637794	160679963	-	6q26	Imprinted	Maternal
SLC22A3	6581	EMT, EMTH, OCT3	6	160769425	160876014	+	6q26-q27	Imprinted	Maternal
DDC	1644	AADC	7	50526134	50633154	-	7p12.2	Imprinted	Isoform Dependent
GRB10	2887	RSS, IRBP, MEG1, GRB-IR, Grb-10, KIAA0207	7	50657760	50861159	-	7p12-p11.2	Imprinted	Isoform Dependent
CALCR	799	CRT, CTR, CTR1	7	93053799	93204042	-	7q21.3	Provisional Data	Maternal
TFPI2	7980	PP5, REF1, TFPI-2, FLJ21164	7	93515745	93520065	-	7q22	Imprinted	Maternal
SGCE	8910	ESG, DYT11	7	94214536	94285521	-	7q21-q22	Imprinted	Paternal
PEG10	23089	Edr, HB-1, Mar2, MEF3L, Mart2, RGAG3, KIAA1051	7	94285637	94299007	+	7q21	Imprinted	Paternal
PPP1R9A	55607	NRB1, NRBI, FLJ20068, KIAA1222, Neurabin-I	7	94536949	94925727	+	7q21.3	Imprinted	Maternal
PON1	5444	ESA, PON, MVCD5	7	94927669	94953884	-	7q21.3	Provisional Data	Maternal
PON3	5446		7	94989184	95025687	-	7q21.3	Unknown	Unknown
PON2	5445		7	95034174	95064384	-	7q21.3	Unknown	Unknown
ASB4	51666	ASB-4, MGC142039, MGC142041	7	95115213	95169543	+	7q21-q22	Unknown	Unknown
DLX5	1749		7	96649702	96654143	-	7q22	Imprinted	Maternal
CPA4	51200	CPA3	7	129932974	129964020	+	7q32	Imprinted	Maternal
MEST	4232	PEG1, MGC8703, MGC111102, DKFZp686L18234	7	130126046	130146133	+	7q32	Imprinted	Paternal
MESTIT1	317751	PEG1-AS, NCRNA00040	7	130126898	130131013	-	7q32	Imprinted	Paternal	no data in COXPRESdb
COPG2	26958	2-COP, FLJ11781, DKFZp761N09121	7	130146079	130353598	-	7q32	Conflicting Data	Paternal
KLF14	136259	BTEB5	7	130417396	130418888	-	7q32.3	Imprinted	Maternal
COPG2IT1	53844	CIT1, COPG2AS, FLJ41646, NCRNA00170, DKFZP761N09121	7				7q32	Imprinted	Paternal	no data in COXPRESdb
DLGAP2	9228	DAP2, SAPAP2	8	1449569	1656642	+	8p23	Imprinted	Paternal
KCNK9	51305	KT3.2, TASK3, K2p9.1, TASK-3, MGC138268, MGC138270	8	140624804	140715299	-	8q24.3	Imprinted	Maternal
ABCA1	19	TGD, ABC1, CERP, ABC-1, HDLDT1, FLJ14958, MGC164864, MGC165011	9	107543283	107690527	-	9q31.1	Imprinted	Unknown
CTNNA3	29119	VR22, MGC26194, MGC75041	10	67679725	69455949	-	10q22.2	Provisional Data	Maternal
H19	283120	ASM, BWS, ASM1, MGC4485, PRO2605, D11S813E	11	2016406	2019065	-	11p15.5	Imprinted	Maternal
IGF2	3481	INSIGF, pp9974, C11orf43, FLJ22066, FLJ44734	11	2150347	2170833	-	11p15.5	Imprinted	Paternal
IGF2AS	51214	PEG8, MGC168198	11	2161758	2169896	+	11p15.5	Imprinted	Paternal
INS	3630	ILPR, IRDN	11	2181009	2182439	-	11p15.5	Imprinted	Paternal
ASCL2	430	ASH2, HASH2, MASH2, bHLHa45	11	2289728	2292182	-	11p15.5	Conflicting Data	Maternal
TRPM5	29850	MTR1, LTRPC5	11	2425745	2444275	-	11p15.5	Provisional Data	Paternal
KCNQ1	3784	LQT, RWS, WRS, LQT1, SQT2, ATFB1, ATFB3, JLNS1, KCNA8, KCNA9, Kv1.9, Kv7.1, KVLQT1, FLJ26167	11	2466221	2870340	+	11p15.5	Imprinted	Maternal
KCNQ1OT1	10984	LIT1, KvDMR1, KCNQ10T1, KvLQT1-AS, long QT intronic transcript 1	11	2661768	2721228	-	11p15	Imprinted	Paternal
KCNQ1DN	55539	BWRT, HSA404617	11	2891263	2893335	+	11p15.4	Imprinted	Maternal
CDKN1C	1028	BWS, WBS, p57, BWCR, KIP2	11	2904448	2906995	-	11p15.5	Imprinted	Maternal
SLC22A18AS	5003	BWR1B, BWSCR1B, ORCTL2S, SLC22A1LS, p27-BWR1B	11	2909327	2925175	-	11p15.5	Provisional Data	Maternal
SLC22A18	5002	HET, ITM, BWR1A, IMPT1, TSSC5, ORCTL2, BWSCR1A, SLC22A1L, p45-BWR1A, DKFZp667A184	11	2920951	2946476	+	11p15.5	Imprinted	Maternal
PHLDA2	7262	IPL, BRW1C, BWR1C, HLDA2, TSSC3	11	2949503	2950650	-	11p15.5	Imprinted	Maternal
NAP1L4	4676	NAP2, NAP2L, hNAP2, MGC4565, NAP1L4b	11	2965660	3013607	-	11p15.5	Unknown	Unknown
OSBPL5	114879	ORP5, OBPH1, FLJ42929	11	3108346	3186582	-	11p15.4	Imprinted	Maternal
ZNF215	7762	BAZ2, ZKSCAN11	11	6947654	6979278	+	11p15.4	Provisional Data	Maternal
SDHD	6392	PGL, CBT1, PGL1, SDH4	11	111957571	111966518	+	11q23	Conflicting Data	Paternal
RBP5	83758	CRBP3, CRBPIII, CRBP-III	12	7276280	7281466	-	12p13.31	Imprinted	Maternal
SLC38A4	55089	ATA3, NAT3, PAAT, FLJ10191, MGC126876	12	47158544	47219780	-	12q13	Unknown	Unknown
DCN	1634	CSCD, PG40, PGII, PGS2, DSPG2, SLRR1B	12	91539035	91576806	-	12q21.33	Unknown	Unknown
HTR2A	3356	HTR2, 5-HT2A	13	47407513	47471169	-	13q14-q21	Conflicting Data	Maternal
DLK1	8788	DLK, FA1, ZOG, pG2, PREF1, Pref-1	14	101193202	101201467	+	14q32	Imprinted	Paternal
MEG3	55384	GTL2, FP504, prebp1, PRO0518, PRO2160, FLJ31163, FLJ42589	14	101292445	101327363	+	14q32	Imprinted	Maternal
RTL1	388015	MART1, PEG11, LOC388015	14	101346992	101351184	-	14q32.31	Unknown	Unknown	no data in COXPRESdb
MEG8	79104	Rian	14	101361107	101373305		14q32.31	Unknown	Unknown
DIO3	1735	D3, 5DIII, TXDI3, DIOIII	14	102027688	102029789	+	14q32	Unknown	Unknown
MKRN3	7681	D15S9, RNF63, ZFP127, ZNF127, MGC88288	15	23810454	23813167	+	15q11-q13	Imprinted	Paternal
MAGEL2	54551	nM15, NDNL1	15	23888696	23892993	-	15q11-q12	Imprinted	Paternal
NDN	4692	HsT16328	15	23930554	23932450	-	15q11.2-q12	Imprinted	Paternal
SNRPN	6638	SMN, PWCR, SM-D, RT-LI, HCERN3, SNRNP-N, FLJ33569, FLJ36996, FLJ39265, MGC29886, SNURF-SNRPN, DKFZp762N022, DKFZp686C0927, DKFZp761I1912, DKFZp686M12165	15	25068794	25664609	+	15q11.2	Imprinted	Paternal
SNURF	8926		15	25200070	25223729	+	15q12	Imprinted	Paternal	no data in COXPRESdb
SNORD107	91380	HBII-436, HBII-436 C/D box snoRNA	15	25227141	25227215	+	15q11.2	Imprinted	Paternal	no data in COXPRESdb
SNORD64	347686	HBII-13, HBII-13 snoRNA	15	25230247	25230313	+	15q12	Imprinted	Paternal	no data in COXPRESdb
SNORD108	338427	HBII-437, HBII-437 C/D box snoRNA	15	25232072	25232140	+	15q11.2	Imprinted	Paternal	no data in COXPRESdb
SNORD109A	338428	HBII-438A	15	25287121	25287187	+	15q11.2	Imprinted	Paternal	no data in COXPRESdb
SNORD116@	692236	PWCR1, PET1, non-coding RNA in the Prader-Willi critical region	15	25296623	25351750	+	15q11.2	Imprinted	Paternal	no data in Gemma, no data in COXPRESdb
SNORD115@	692218	HBII-52	15	25415870	25515005	+	15q11.2	Imprinted	Paternal	no data in Gemma, no data in COXPRESdb
SNORD115-48	100033822	HBII-52-48	15	25514930	25515005	+	15q11.2	Imprinted	Paternal	no data in COXPRESdb
SNORD109B	338429	HBII-438B, HBII-438B C/D box snoRNA	15	25523490	25523556	+	15q11.2	Imprinted	Paternal	no data in COXPRESdb
UBE3A	7337	AS, ANCR, E6-AP, HPVE6A, EPVE6AP, FLJ26981	15	25582396	25684175	-	15q11-q13	Imprinted	Maternal
ATP10A	57194	ATPVA, ATPVC, ATP10C, KIAA0566	15	25923859	26108349	-	15q11.2	Imprinted	Maternal
GABRB3	2562	MGC9051	15	26788693	27018935	-	15q11.2-q12	Conflicting Data	Paternal
GABRA5	2558	MGC138184	15	27111866	27194357	+	15q11.2-q12	Conflicting Data	Paternal
GABRG3	2567		15	27216429	27778373	+	15q12	Conflicting Data	Paternal
GATM	2628	AT, AGAT	15	45653322	45670980	-	15q21.1	Unknown	Unknown
RASGRF1	5923	GNRP, GRF1, CDC25, GRF55, CDC25L, H-GRF55, PP13187	15	79252289	79383215	-	15q24.2	Unknown	Unknown
MKRN3-AS1	10108	MKRN3AS, Znp127as	15				15q11-q13	Unknown	Unknown	no data in COXPRESdb
ANKRD11	29123	T13, LZ16, ANCO-1	16	89334035	89556969	-	16q24.3	Imprinted	Maternal
TCEB3C	162699	HsT829, TCEB3L2, Elongin A3	18	44554573	44556449	-	18q21.1	Imprinted	Maternal
ZIM2	23619	ZNF656	19	57285915	57352097	-	19q13.4	Imprinted	Paternal
PEG3	5178	PW1, ZSCAN24, KIAA0287, DKFZp781A095	19	57321445	57352094	-	19q13.4	Imprinted	Paternal
USP29	57663	MGC163266, MGC163270, HOM-TES-84/86	19	57631509	57643294	+	19q13.43	Unknown	Unknown
ZIM3	114026	ZNF657, MGC138876, MGC138877	19	57645464	57656570	-		Unknown	Unknown
ZNF264	9422	Zfp264	19	57702868	57734214	+	19q13.4	Imprinted	Maternal
BLCAP	10904	BC10	20	36145819	36156333	-	20q11.2-q12	Imprinted	Isoform Dependent
NNAT	4826	Peg5, MGC1439	20	36149607	36152092	+	20q11.2-q12	Imprinted	Paternal
L3MBTL1	26013	L3MBTL, FLJ41181, KIAA0681, H-L(3)MBT, dJ138B7.3, DKFZp586P1522	20	42136320	42170535	+	20q13.12	Imprinted	Paternal
GNAS-AS1	149775	SANG, Nespas	20	57393973	57425958		20q13.32	Imprinted	Paternal
GNAS	2778	AHO, GSA, GSP, POH, GPSA, NESP, GNAS1, PHP1A, PHP1B, C20orf45, MGC33735, dJ309F20.1.1, dJ806M20.3.3	20	57414795	57486250	+	20q13.3	Imprinted	Isoform Dependent
COMMD1	150684	MURR1, C2orf5, MGC27155	2	62132803	62363205	+	2p15	Not Imprinted	Biallelic
IGF2R	3482	MPR1, MPRI, CD222, CIMPR, M6P-R	6	160390131	160527583	+	6q26	Not Imprinted	Biallelic
TSPAN32	10077	ART1, PHMX, PHEMX, TSSC6, FLJ17158, FLJ97586, MGC22455	11	2323243	2339430	+	11p15.5	Not Imprinted	Biallelic
CD81	975	S5.7, TAPA1, TSPAN28	11	2398547	2418649	+	11p15.5	Not Imprinted	Biallelic
TSSC4	10078		11	2423523	2425106	+	11p15.5	Not Imprinted	Biallelic
IMPACT	55364	MGC33718	18	22006609	22033495	+	18q11.2-q12.1	Not Imprinted	Biallelic
