# Supplementary material for: A systems-level approach to parental genomic imprinting: the imprinted gene network includes extracellular matrix genes and regulates cell cycle exit and differentiation
Source: HighWire-hosted journal article supplement (doi:10.1101/gr.175919.114), 2015-01-22
Supplement: Table_S6.xlsx [file Table_S6.xlsx]

## Sheet: Table S6
Query Symbol	Query Gene ID	Coexpressed Symbol	Coexpressed Gene ID	Specificity	Positive Support	Negative Support	NumberofDatasetsTestedIn
PEG10	23089	SGCE	8910	0.759	116	0	1365
PLAGL1	5325	HYMAI	57061	0.9275	94	0	884
H19	283120	IGF2	3481	0.8488	74	0	1077
DCN	1634	NDN	4692	0.8406	55	0	1307
SNRPN	6638	UBE3A	7337	0.9994	51	0	1800
SLC22A18AS	5003	SLC22A18	5002	0.7927	46	0	1629
SNORD109B	338429	SNORD109A	338428	0.13	44	0	63
DCN	1634	IGF2	3481	0.8488	39	0	1326
DCN	1634	SGCE	8910	0.8406	38	0	1333
PON2	5445	PON3	5446	0.9469	35	0	1129
PEG3	5178	ZIM2	23619	0.6893	30	0	956
GABRA5	2558	GABRB3	2562	0.7013	28	0	736
DCN	1634	PLAGL1	5325	0.9275	28	0	1444
KCNQ1DN	55539	IGF2-AS	51214	0.4814	25	0	779
IGF2	3481	IGF2-AS	51214	0.8488	25	0	922
PON2	5445	GATM	2628	0.9469	22	0	1491
IGF2	3481	DLK1	8788	0.8488	21	0	1004
OSBPL5	114879	ASCL2	430	0.7015	20	0	1108
IGF2	3481	MEG3	55384	0.8488	20	0	1304
PEG3	5178	PEG10	23089	0.759	20	0	1103
SNRPN	6638	NDN	4692	0.9994	19	0	1463
SNURF	8926	NDN	4692	0.9848	19	0	1438
PON2	5445	SGCE	8910	0.9469	19	0	1561
NDN	4692	CDKN1C	1028	0.8912	18	0	1467
IGF2	3481	CDKN1C	1028	0.8912	18	0	1541
MEG3	55384	DLK1	8788	0.736	18	0	876
PPP1R9A	55607	PEG10	23089	0.759	18	0	1113
MAGEL2	54551	NDN	4692	0.6488	17	0	576
PPP1R9A	55607	ANKRD11	29123	0.8701	16	0	1125
SNRPN	6638	NAP1L4	4676	0.9994	16	2	1506
PON1	5444	PON3	5446	0.463	16	0	440
PHLDA2	7262	SLC22A18AS	5003	0.7669	16	0	1398
PEG3	5178	DLK1	8788	0.6893	15	0	854
NAP1L4	4676	GNAS	2778	0.9961	15	2	1521
H19	283120	CDKN1C	1028	0.8912	14	0	1152
H19	283120	DLK1	8788	0.5197	14	0	756
DCN	1634	MEG3	55384	0.8406	14	0	1286
PLAGL1	5325	MEG3	55384	0.9275	14	0	1392
PEG3	5178	NDN	4692	0.6893	14	0	1069
SNURF	8926	NAP1L4	4676	0.9848	13	0	1477
BLCAP	10904	NNAT	4826	0.9016	13	0	1554
PHLDA2	7262	TFPI2	7980	0.7669	13	0	1037
DCN	1634	CDKN1C	1028	0.8912	12	0	1465
MEST	4232	CPA4	51200	0.6598	12	0	1218
PEG3	5178	GABRB3	2562	0.7013	12	0	956
PEG3	5178	GATM	2628	0.7798	12	0	1103
SNRPN	6638	PEG10	23089	0.9994	12	0	1462
DDC	1644	RBP5	83758	0.5863	12	0	759
NDN	4692	SGCE	8910	0.7054	12	0	1317
PHLDA2	7262	SLC22A18	5002	0.7927	12	0	1510
SNRPN	6638	SNORD64	347686	0.9994	12	0	93
ZNF264	9422	UBE3A	7337	0.9968	12	1	1755
KCNQ1OT1	10984	ANKRD11	29123	0.8701	11	0	970
PEG3	5178	DIRAS3	9077	0.6893	11	0	761
PEG10	23089	DLK1	8788	0.759	11	0	936
BLCAP	10904	GNAS	2778	0.9961	11	0	1734
NDN	4692	IGF2	3481	0.8488	11	0	1322
UBE3A	7337	KCNQ1	3784	0.9968	2	11	1617
DCN	1634	PON2	5445	0.9469	11	0	1491
PPP1R9A	55607	SNRPN	6638	0.9994	11	0	1245
SNURF	8926	UBE3A	7337	0.9968	11	0	1752
ZNF264	9422	ANKRD11	29123	0.8701	10	1	1526
UBE3A	7337	ANKRD11	29123	0.9968	10	1	1582
PLAGL1	5325	CDKN1C	1028	0.9275	10	0	1668
GRB10	2887	CDKN1C	1028	0.9904	10	0	1767
PPP1R9A	55607	GABRB3	2562	0.7013	10	0	913
PEG3	5178	MEG3	55384	0.736	10	0	1051
CDKN1C	1028	MEG3	55384	0.8912	10	0	1409
PPP1R9A	55607	PEG3	5178	0.6999	10	0	941
DDC	1644	PON3	5446	0.5863	10	0	791
NAP1L5	266812	SNRPN	6638	0.9994	10	0	1323
PEG10	23089	SNURF	8926	0.9848	10	0	1425
PON2	5445	TFPI2	7980	0.9469	10	0	1088
SDHD	6392	UBE3A	7337	0.9968	10	0	1487
GRB10	2887	ANKRD11	29123	0.9904	9	2	1543
PEG3	5178	BLCAP	10904	0.9016	9	0	1187
SNRPN	6638	DDC	1644	0.9994	9	0	1118
SLC22A18	5002	DDC	1644	0.7927	9	0	1100
HTR2A	3356	DLGAP2	9228	0.4726	9	0	519
CDKN1C	1028	DLK1	8788	0.8912	9	0	1054
PLAGL1	5325	GATM	2628	0.9275	9	0	1444
IGF2	3481	GNAS	2778	0.9961	9	0	1545
ANKRD11	29123	GNAS	2778	0.9961	9	0	1512
PEG3	5178	IGF2	3481	0.8488	9	0	1119
KCNQ1OT1	10984	IGF2	3481	0.8488	9	0	847
PEG10	23089	IGF2	3481	0.8488	9	0	1336
MEG3	55384	IGF2-AS	51214	0.736	9	0	915
NDN	4692	MEG3	55384	0.736	9	0	1202
UBE3A	7337	NAP1L4	4676	0.9968	9	3	1573
H19	283120	PLAGL1	5325	0.9275	9	0	1159
NDN	4692	PLAGL1	5325	0.9275	9	0	1416
PEG10	23089	PON2	5445	0.9469	9	0	1481
GATM	2628	PON3	5446	0.7798	9	0	994
SNRPN	6638	SNORD109A	338428	0.9994	9	0	63
SNRPN	6638	SNORD109B	338429	0.9994	9	0	63
DCN	1634	SNRPN	6638	0.9994	9	0	1523
PEG3	5178	SNURF	8926	0.9848	9	0	1185
ABCA1	19	TFPI2	7980	0.8968	9	0	1049
PEG10	23089	TFPI2	7980	0.759	9	0	981
DIRAS3	9077	TFPI2	7980	0.5899	9	0	721
INS	3630	ASB4	51666	0.5122	8	0	463
NNAT	4826	CDKN1C	1028	0.8912	8	0	1563
DCN	1634	CPA4	51200	0.8406	8	0	1269
NAP1L5	266812	DCN	1634	0.8406	8	0	1148
DDC	1644	GABRB3	2562	0.7013	8	0	816
SNURF	8926	GABRB3	2562	0.9848	8	1	1134
ABCA1	19	GATM	2628	0.8968	8	0	1462
UBE3A	7337	GNAS	2778	0.9968	8	4	1808
PHLDA2	7262	GRB10	2887	0.9904	8	0	1544
PEG3	5178	NAP1L5	266812	0.7173	8	0	932
SNURF	8926	NAP1L5	266812	0.9848	8	0	1287
ABCA1	19	PLAGL1	5325	0.9275	8	0	1679
SLC22A18	5002	PLAGL1	5325	0.9275	0	8	1678
ABCA1	19	PON2	5445	0.9469	8	0	1730
DCN	1634	ABCA1	19	0.8968	7	0	1473
SNRPN	6638	ABCA1	19	0.9994	1	7	1710
KLF14	136259	ASB4	51666	0.5122	7	0	430
DCN	1634	ATP10A	57194	0.8406	7	0	1174
ZIM2	23619	CPA4	51200	0.6598	7	0	1162
H19	283120	DCN	1634	0.8406	7	0	1045
SNRPN	6638	GATM	2628	0.9994	7	3	1482
PEG10	23089	GATM	2628	0.7798	7	0	1259
CDKN1C	1028	GNAS	2778	0.9961	7	0	1733
MEG3	55384	HYMAI	57061	0.736	7	0	794
PEG10	23089	MEST	4232	0.759	7	0	1341
PON2	5445	MEST	4232	0.9469	7	0	1571
IGF2	3481	MEST	4232	0.8488	7	0	1379
NAP1L5	266812	NDN	4692	0.7173	7	0	1063
SLC22A18	5002	OSBPL5	114879	0.7927	7	0	1339
H19	283120	PEG10	23089	0.759	7	0	1045
SGCE	8910	PLAGL1	5325	0.9275	7	1	1487
PPP1R9A	55607	PON2	5445	0.9469	7	0	1218
SLC38A4	55089	PON3	5446	0.463	7	0	445
NAP1L5	266812	SGCE	8910	0.7173	7	0	1162
KCNQ1	3784	SLC22A18	5002	0.8249	7	0	1553
PON1	5444	SLC38A4	55089	0.3815	7	0	292
DCN	1634	SNURF	8926	0.9848	7	0	1495
PON2	5445	UBE3A	7337	0.9968	7	0	1817
BLCAP	10904	UBE3A	7337	0.9968	7	2	1777
PHLDA2	7262	ABCA1	19	0.8968	6	0	1484
KCNQ1	3784	ASB4	51666	0.8249	6	0	883
PON3	5446	ASB4	51666	0.5122	6	0	677
SLC22A18	5002	CDKN1C	1028	0.8912	6	0	1713
PEG3	5178	CPA4	51200	0.6893	6	2	981
TFPI2	7980	CPA4	51200	0.6598	6	0	900
PEG3	5178	DCN	1634	0.8406	6	0	1081
KCNQ1	3784	DDC	1644	0.8249	6	0	1047
GRB10	2887	DDC	1644	0.9904	6	0	1122
DDC	1644	DLK1	8788	0.5863	6	0	694
GNAS	2778	DLK1	8788	0.9961	6	0	1034
GABRG3	2567	GABRA5	2558	0.4837	6	0	401
PEG10	23089	GABRB3	2562	0.759	6	0	1029
NAP1L5	266812	GATM	2628	0.7798	6	0	1097
PEG10	23089	GNAS	2778	0.9961	6	0	1463
SNRPN	6638	GRB10	2887	0.9994	2	6	1761
BLCAP	10904	GRB10	2887	0.9904	6	5	1740
GABRA5	2558	HTR2A	3356	0.4837	6	0	548
DCN	1634	HTR2A	3356	0.8406	6	0	822
IGF2	3481	HYMAI	57061	0.8488	6	0	761
RBP5	83758	IGF2	3481	0.8488	6	0	878
KCNQ1	3784	KCNQ1DN	55539	0.8249	6	0	872
PEG3	5178	KCNQ1OT1	10984	0.6893	6	0	684
H19	283120	MEG3	55384	0.736	6	0	1064
SNRPN	6638	MEST	4232	0.9994	6	2	1535
GNAS	2778	MEST	4232	0.9961	6	0	1531
PON2	5445	NDN	4692	0.9469	6	0	1492
UBE3A	7337	NDN	4692	0.9968	6	0	1507
KCNQ1DN	55539	NNAT	4826	0.6802	6	0	884
DLX5	1749	NNAT	4826	0.6802	6	0	737
GABRB3	2562	NNAT	4826	0.7013	6	0	1097
ATP10A	57194	OSBPL5	114879	0.7015	6	0	1054
PON3	5446	PEG3	5178	0.6893	6	0	870
DIRAS3	9077	PON3	5446	0.463	6	0	669
SLC22A3	6581	SLC38A4	55089	0.3815	6	0	330
BLCAP	10904	SNRPN	6638	0.9994	6	3	1715
ABCA1	19	SNURF	8926	0.9848	1	6	1663
BLCAP	10904	SNURF	8926	0.9848	6	3	1683
H19	283120	TFPI2	7980	0.5899	6	0	789
IGF2-AS	51214	TRPM5	29850	0.4814	6	0	540
SLC22A18	5002	UBE3A	7337	0.9968	0	6	1777
GABRB3	2562	UBE3A	7337	0.9968	6	0	1186
NNAT	4826	UBE3A	7337	0.9968	0	6	1623
GABRB3	2562	ZIM2	23619	0.7013	6	0	872
IGF2	3481	ZIM2	23619	0.8488	6	0	1177
SLC38A4	55089	ASB4	51666	0.5122	5	0	453
PEG10	23089	ASB4	51666	0.759	5	0	836
DDC	1644	ASB4	51666	0.5863	5	0	657
MEG3	55384	ASB4	51666	0.736	5	0	794
CALCR	799	ASB4	51666	0.5122	5	0	602
KCNQ1	3784	ASCL2	430	0.8249	5	0	1088
KCNQ1	3784	ATP10A	57194	0.8249	5	0	1190
GABRA5	2558	ATP10A	57194	0.5452	5	0	611
GABRB3	2562	CALCR	799	0.7013	5	0	633
KCNQ1	3784	CDKN1C	1028	0.8912	5	0	1559
ABCA1	19	CDKN1C	1028	0.8968	5	0	1713
PEG3	5178	CDKN1C	1028	0.8912	5	0	1223
KCNQ1OT1	10984	CDKN1C	1028	0.8912	5	0	954
GATM	2628	CDKN1C	1028	0.8912	5	0	1463
TFPI2	7980	CDKN1C	1028	0.8912	5	0	1063
PHLDA2	7262	CPA4	51200	0.7669	5	0	1173
IGF2	3481	CPA4	51200	0.8488	5	0	1233
NNAT	4826	CPA4	51200	0.6802	5	0	1242
PON1	5444	DDC	1644	0.5863	5	0	352
L3MBTL1	26013	DIO3	1735	0.6617	5	0	1141
PEG10	23089	DIRAS3	9077	0.759	5	0	837
MEG3	55384	DIRAS3	9077	0.736	5	0	818
PLAGL1	5325	DLK1	8788	0.9275	5	0	1028
GATM	2628	DLK1	8788	0.7798	5	0	930
INS	3630	DLK1	8788	0.4306	5	0	492
KCNQ1OT1	10984	GABRB3	2562	0.7013	5	0	722
SLC22A2	6582	GATM	2628	0.7798	5	0	465
SLC38A4	55089	GATM	2628	0.7798	5	0	519
SGCE	8910	GATM	2628	0.7798	5	0	1320
DIRAS3	9077	GATM	2628	0.7798	5	0	793
DCN	1634	GNAS	2778	0.9961	5	3	1488
MEG3	55384	HTR2A	3356	0.736	5	0	729
MAGEL2	54551	IGF2	3481	0.8488	5	0	657
RASGRF1	5923	IGF2-AS	51214	0.5308	5	0	797
OSBPL5	114879	IGF2-AS	51214	0.7015	5	0	853
KCNQ1	3784	INS	3630	0.8249	5	0	671
UBE3A	7337	KCNQ1DN	55539	0.9968	5	4	902
SNRPN	6638	MEG3	55384	0.9994	5	0	1464
ZIM2	23619	MEG3	55384	0.736	5	0	1109
SGCE	8910	MEST	4232	0.7054	5	0	1363
DLX5	1749	MEST	4232	0.5344	5	0	669
CDKN1C	1028	MEST	4232	0.8912	5	0	1538
MEG3	55384	MEST	4232	0.736	5	0	1242
IGF2-AS	51214	NNAT	4826	0.6802	5	0	945
PON2	5445	OSBPL5	114879	0.9469	5	0	1341
CDKN1C	1028	OSBPL5	114879	0.8912	5	2	1325
GABRA5	2558	PEG10	23089	0.759	5	0	718
NDN	4692	PEG10	23089	0.759	5	0	1250
SDHD	6392	PLAGL1	5325	0.9275	5	0	1391
SDHD	6392	PON2	5445	0.9469	5	0	1463
SNURF	8926	PPP1R9A	55607	0.9848	5	0	1208
ZNF264	9422	PPP1R9A	55607	0.7315	5	0	1210
SLC22A2	6582	RBP5	83758	0.3864	5	0	408
PON3	5446	RBP5	83758	0.463	5	0	679
PPP1R9A	55607	SGCE	8910	0.7054	5	0	1110
SNRPN	6638	SGCE	8910	0.9994	5	0	1502
DCN	1634	SLC38A4	55089	0.8406	5	0	534
SGCE	8910	SNURF	8926	0.9848	5	0	1470
PLAGL1	5325	SNURF	8926	0.9848	0	5	1646
SNORD64	347686	SNURF	8926	0.9848	5	0	92
GRB10	2887	SNURF	8926	0.9904	2	5	1722
DDC	1644	SNURF	8926	0.9848	5	0	1081
RASGRF1	5923	TP73	7161	0.5919	5	0	938
IGF2-AS	51214	TP73	7161	0.5919	5	0	774
L3MBTL1	26013	UBE3A	7337	0.9968	5	1	1550
ABCA1	19	UBE3A	7337	0.9968	0	5	1771
BLCAP	10904	ZNF264	9422	0.9016	5	0	1708
H19	283120	ABCA1	19	0.8968	4	0	1136
SDHD	6392	ANKRD11	29123	0.8701	0	4	1384
OSBPL5	114879	ANKRD11	29123	0.8701	4	0	1210
GABRA5	2558	ASB4	51666	0.5122	4	0	538
SLC22A18AS	5003	ASB4	51666	0.573	4	0	902
IGF2-AS	51214	ASB4	51666	0.5122	4	0	556
NNAT	4826	ASB4	51666	0.6802	4	0	902
H19	283120	ASCL2	430	0.5197	4	0	949
SNRPN	6638	ATP10A	57194	0.9994	4	0	1344
PEG10	23089	CDKN1C	1028	0.8912	4	0	1455
NDN	4692	COPG2	26958	0.6488	4	0	1050
H19	283120	CPA4	51200	0.6598	4	0	977
SLC22A18AS	5003	CPA4	51200	0.6598	4	0	1310
RASGRF1	5923	CPA4	51200	0.6598	4	0	980
HYMAI	57061	DCN	1634	0.8406	4	0	822
KCNQ1	3784	DCN	1634	0.8406	4	0	1319
MAGEL2	54551	DCN	1634	0.8406	4	0	619
DLK1	8788	DCN	1634	0.8406	4	0	886
ABCA1	19	DDC	1644	0.8968	4	0	1080
SLC22A18AS	5003	DDC	1644	0.5863	4	0	1032
KCNQ1OT1	10984	DDC	1644	0.5863	4	0	663
COPG2	26958	DDC	1644	0.5863	4	0	891
SLC38A4	55089	DDC	1644	0.5863	4	0	472
DIO3	1735	DDC	1644	0.5863	4	0	893
NAP1L5	266812	DIRAS3	9077	0.7173	4	0	797
SGCE	8910	DIRAS3	9077	0.7054	4	0	865
GABRA5	2558	DLGAP2	9228	0.4837	4	0	527
PPP1R9A	55607	DLK1	8788	0.6999	4	0	769
DIO3	1735	DLK1	8788	0.4306	4	0	791
NNAT	4826	DLK1	8788	0.6802	4	0	968
MEST	4232	DLK1	8788	0.5344	4	0	948
GABRA5	2558	DLX5	1749	0.4837	4	0	432
RASGRF1	5923	GABRB3	2562	0.7013	4	0	942
PLAGL1	5325	GABRB3	2562	0.9275	2	4	1136
PON1	5444	GATM	2628	0.7798	4	0	526
SDHD	6392	GATM	2628	0.7798	4	0	1225
MAGEL2	54551	GATM	2628	0.7798	4	0	615
DCN	1634	GATM	2628	0.8406	4	3	1292
ZNF264	9422	GATM	2628	0.7798	4	0	1452
PON1	5444	GNAS	2778	0.9961	4	0	583
PEG3	5178	GNAS	2778	0.9961	4	0	1212
SNRPN	6638	GNAS	2778	0.9994	24	4	1742
PLAGL1	5325	GNAS	2778	0.9961	2	4	1700
DLGAP2	9228	GNAS	2778	0.9961	4	0	928
ZIM2	23619	GNAS	2778	0.9961	4	0	1269
PPP1R9A	55607	GRB10	2887	0.9904	4	0	1224
KCNQ1	3784	GRB10	2887	0.9904	4	2	1594
PEG3	5178	GRB10	2887	0.9904	4	0	1237
PLAGL1	5325	GRB10	2887	0.9904	4	4	1713
DLX5	1749	GRB10	2887	0.9904	0	4	775
PPP1R9A	55607	H19	283120	0.6999	4	0	955
SNRPN	6638	HTR2A	3356	0.9994	4	0	903
KCNQ1	3784	IGF2	3481	0.8488	4	0	1381
SLC22A18AS	5003	IGF2	3481	0.8488	4	0	1416
SLC38A4	55089	IGF2	3481	0.8488	4	0	551
PON2	5445	IGF2	3481	0.9469	4	0	1545
DDC	1644	IGF2	3481	0.8488	4	0	1025
DIO3	1735	IGF2-AS	51214	0.4814	4	0	874
SLC22A2	6582	INS	3630	0.3614	4	0	299
PEG3	5178	INS	3630	0.6893	4	0	493
L3MBTL1	26013	KCNQ1	3784	0.8249	4	0	1375
PON2	5445	KCNQ1	3784	0.9469	4	0	1562
L3MBTL1	26013	KCNQ1DN	55539	0.6617	4	0	831
DIO3	1735	KCNQ1DN	55539	0.4114	4	0	779
HYMAI	57061	KCNQ1OT1	10984	0.4704	4	0	601
TP73	7161	KLF14	136259	0.5919	4	0	659
OSBPL5	114879	L3MBTL1	26013	0.7015	4	0	1221
NNAT	4826	L3MBTL1	26013	0.6802	4	0	1398
TRPM5	29850	L3MBTL1	26013	0.6617	4	0	495
L3MBTL1	26013	MEG3	55384	0.736	4	0	1343
KLF14	136259	MEG3	55384	0.736	4	0	641
GABRB3	2562	MEG3	55384	0.736	4	0	983
PEG3	5178	MEST	4232	0.6893	4	0	1106
PLAGL1	5325	MEST	4232	0.9275	4	0	1490
SLC22A18	5002	NAP1L4	4676	0.7927	1	4	1490
BLCAP	10904	NAP1L4	4676	0.9016	4	0	1509
ABCA1	19	NDN	4692	0.8968	4	0	1456
GABRA5	2558	NNAT	4826	0.6802	4	0	779
PEG3	5178	NNAT	4826	0.6893	4	0	1129
PEG10	23089	NNAT	4826	0.759	4	0	1345
KCNQ1	3784	OSBPL5	114879	0.8249	4	0	1231
DCN	1634	OSBPL5	114879	0.8406	4	0	1182
ZNF215	7762	PLAGL1	5325	0.9275	4	0	933
PPP1R9A	55607	PLAGL1	5325	0.9275	4	0	1189
PHLDA2	7262	PON2	5445	0.9469	4	0	1536
SNRPN	6638	PON3	5446	0.9994	4	0	1122
NDN	4692	PON3	5446	0.6488	4	0	1001
GABRA5	2558	RASGRF1	5923	0.5308	4	0	671
SNRPN	6638	RASGRF1	5923	0.9994	4	0	1207
SLC38A4	55089	RBP5	83758	0.3864	4	0	424
ABCA1	19	SLC22A18	5002	0.8968	4	0	1712
SNRPN	6638	SLC38A4	55089	0.9994	4	0	607
SNURF	8926	SNORD109B	338429	0.9848	4	0	62
SNORD109B	338429	SNORD64	347686	0.1578	4	0	53
SNORD109A	338428	SNORD64	347686	0.1578	4	0	53
PHLDA2	7262	SNURF	8926	0.9848	1	4	1453
SNORD109A	338428	SNURF	8926	0.9848	4	0	62
ZNF264	9422	TCEB3C	162699	0.7315	4	0	369
SGCE	8910	TFPI2	7980	0.7054	4	0	1008
KCNQ1OT1	10984	UBE3A	7337	0.9968	1	4	965
IGF2-AS	51214	UBE3A	7337	0.9968	4	0	1009
IGF2-AS	51214	ZIM2	23619	0.4814	4	0	821
KCNQ1OT1	10984	ZNF264	9422	0.7315	0	4	961
PLAGL1	5325	ZNF264	9422	0.9275	4	0	1657
PPP1R9A	55607	ABCA1	19	0.8968	0	3	1205
NAP1L4	4676	ANKRD11	29123	0.8701	3	0	1443
SLC22A3	6581	ASB4	51666	0.5122	3	0	349
SNRPN	6638	ASB4	51666	0.9994	0	3	913
TP73	7161	ASB4	51666	0.5919	3	0	692
DDC	1644	ASCL2	430	0.5863	3	0	831
NAP1L4	4676	ASCL2	430	0.7802	3	0	889
COPG2	26958	ATP10A	57194	0.5452	0	3	1007
NDN	4692	ATP10A	57194	0.6488	3	0	1089
SNURF	8926	ATP10A	57194	0.9848	3	0	1305
DIRAS3	9077	ATP10A	57194	0.5452	3	0	681
PPP1R9A	55607	BLCAP	10904	0.9016	0	3	1189
SDHD	6392	BLCAP	10904	0.9016	3	0	1453
NDN	4692	BLCAP	10904	0.9016	3	0	1466
PON2	5445	BLCAP	10904	0.9469	3	3	1742
SGCE	8910	BLCAP	10904	0.9016	3	0	1529
ASCL2	430	CALCR	799	0.4908	3	0	609
SLC38A4	55089	CALCR	799	0.3815	3	0	386
L3MBTL1	26013	CDKN1C	1028	0.8912	3	0	1510
SLC22A3	6581	CDKN1C	1028	0.8912	3	0	518
PON2	5445	CDKN1C	1028	0.9469	3	0	1752
SGCE	8910	CDKN1C	1028	0.8912	3	0	1512
IGF2-AS	51214	CDKN1C	1028	0.8912	3	0	971
PON3	5446	CDKN1C	1028	0.8912	3	0	1114
PPP1R9A	55607	COPG2	26958	0.6999	3	0	1007
MESTIT1	317751	CPA4	51200	0.6598	3	0	120
PEG10	23089	CPA4	51200	0.759	3	0	1203
MEG3	55384	CPA4	51200	0.736	3	0	1178
PPP1R9A	55607	DCN	1634	0.8406	3	0	1131
GABRA5	2558	DCN	1634	0.8406	3	0	700
SLC22A2	6582	DDC	1644	0.5863	3	0	457
DLGAP2	9228	DDC	1644	0.5863	3	0	663
INS	3630	DDC	1644	0.5863	3	0	528
GRB10	2887	DIO3	1735	0.9904	3	0	1275
GRB10	2887	DIRAS3	9077	0.9904	3	0	913
GABRB3	2562	DIRAS3	9077	0.7013	3	0	791
L3MBTL1	26013	DLGAP2	9228	0.6617	3	0	864
KLF14	136259	DLGAP2	9228	0.4726	3	0	491
KCNQ1	3784	DLGAP2	9228	0.8249	3	0	873
SLC22A18AS	5003	DLGAP2	9228	0.573	3	0	884
BLCAP	10904	DLGAP2	9228	0.9016	3	0	917
TP73	7161	DLGAP2	9228	0.5919	3	0	654
HYMAI	57061	DLK1	8788	0.4306	3	0	479
MAGEL2	54551	DLK1	8788	0.4306	3	0	526
ASCL2	430	DLK1	8788	0.4908	3	0	679
IGF2-AS	51214	DLK1	8788	0.4814	3	0	586
ZIM2	23619	DLK1	8788	0.4384	3	0	832
DCN	1634	DLX5	1749	0.8406	3	1	685
PON2	5445	DLX5	1749	0.9469	0	3	764
PLAGL1	5325	DLX5	1749	0.9275	3	0	751
ABCA1	19	GABRB3	2562	0.8968	3	4	1155
SLC22A18AS	5003	GABRB3	2562	0.7013	3	0	1060
NDN	4692	GABRB3	2562	0.7013	3	2	969
PPP1R9A	55607	GATM	2628	0.7798	3	0	1079
SLC22A18AS	5003	GATM	2628	0.7798	3	0	1360
NDN	4692	GATM	2628	0.7798	3	0	1276
GRB10	2887	GATM	2628	0.9904	3	1	1495
SNURF	8926	GATM	2628	0.9848	7	3	1448
IGF2	3481	GATM	2628	0.8488	3	0	1302
PHLDA2	7262	GNAS	2778	0.9961	3	2	1511
ABCA1	19	GNAS	2778	0.9961	3	1	1711
SLC22A18AS	5003	GNAS	2778	0.9961	3	0	1610
PON2	5445	GNAS	2778	0.9961	3	0	1767
SGCE	8910	GNAS	2778	0.9961	3	0	1521
DLX5	1749	GNAS	2778	0.9961	3	0	762
ZNF264	9422	GNAS	2778	0.9961	0	3	1704
DIRAS3	9077	GNAS	2778	0.9961	3	0	892
GATM	2628	GNAS	2778	0.9961	0	3	1475
INS	3630	GNAS	2778	0.9961	3	0	695
L3MBTL1	26013	GRB10	2887	0.9904	3	2	1550
SLC22A3	6581	GRB10	2887	0.9904	3	0	524
SDHD	6392	GRB10	2887	0.9904	0	3	1464
SLC22A18AS	5003	GRB10	2887	0.9904	2	3	1637
DCN	1634	GRB10	2887	0.9904	3	2	1503
SGCE	8910	GRB10	2887	0.9904	3	0	1547
ZNF264	9422	GRB10	2887	0.9904	3	0	1728
TFPI2	7980	GRB10	2887	0.9904	3	0	1089
PEG3	5178	HTR2A	3356	0.6893	3	0	735
KCNQ1OT1	10984	HTR2A	3356	0.4704	3	0	613
SLC38A4	55089	HTR2A	3356	0.4563	3	0	363
GABRB3	2562	HTR2A	3356	0.7013	3	0	683
IGF2	3481	HTR2A	3356	0.8488	3	0	842
SLC22A3	6581	IGF2	3481	0.8488	0	3	491
KLF14	136259	IGF2	3481	0.8488	3	0	653
ABCA1	19	IGF2	3481	0.8968	3	0	1510
SNRPN	6638	IGF2	3481	0.9994	3	3	1520
GRB10	2887	IGF2	3481	0.9904	3	1	1571
SNURF	8926	IGF2	3481	0.9848	2	3	1479
TP73	7161	IGF2	3481	0.8488	3	0	1001
PON3	5446	IGF2	3481	0.8488	3	2	1077
KLF14	136259	IGF2-AS	51214	0.4814	3	0	608
SLC22A2	6582	IGF2-AS	51214	0.4814	3	0	479
MAGEL2	54551	IGF2-AS	51214	0.4814	3	0	528
DLX5	1749	IGF2-AS	51214	0.4814	3	0	517
H19	283120	INS	3630	0.5197	3	0	521
SLC22A18AS	5003	INS	3630	0.573	3	0	637
TP73	7161	INS	3630	0.5919	3	0	451
ZIM2	23619	INS	3630	0.4384	3	0	461
PHLDA2	7262	KCNQ1	3784	0.8249	3	0	1372
SNRPN	6638	KCNQ1	3784	0.9994	3	1	1551
TP73	7161	KCNQ1DN	55539	0.5919	3	0	737
MEG3	55384	KCNQ1DN	55539	0.736	3	0	834
L3MBTL1	26013	KCNQ1OT1	10984	0.6617	3	0	907
UBE3A	7337	KLF14	136259	0.9968	0	3	705
SNRPN	6638	L3MBTL1	26013	0.9994	3	0	1545
TFPI2	7980	L3MBTL1	26013	0.6617	3	0	960
PPP1R9A	55607	MEG3	55384	0.736	3	0	1107
GABRA5	2558	MEG3	55384	0.736	3	0	693
MAGEL2	54551	MEG3	55384	0.736	3	0	661
SLC22A18AS	5003	MEG3	55384	0.736	3	0	1343
KCNQ1OT1	10984	MEG3	55384	0.736	3	0	889
PEG10	23089	MEG3	55384	0.759	3	0	1274
GATM	2628	MEG3	55384	0.7798	3	0	1219
PON3	5446	MEG3	55384	0.736	3	0	970
ABCA1	19	MEST	4232	0.8968	3	0	1523
ASCL2	430	MEST	4232	0.5344	3	0	933
NDN	4692	MEST	4232	0.6488	3	0	1362
BLCAP	10904	MEST	4232	0.9016	3	0	1515
SNURF	8926	MEST	4232	0.9848	3	0	1513
ABCA1	19	NAP1L4	4676	0.8968	0	3	1483
KCNQ1	3784	NAP1L5	266812	0.8249	0	3	1180
GABRA5	2558	NAP1L5	266812	0.7173	3	0	661
PLAGL1	5325	NAP1L5	266812	0.9275	3	0	1274
ZNF215	7762	NDN	4692	0.6488	3	0	859
GABRA5	2558	NDN	4692	0.6488	3	0	669
OSBPL5	114879	NDN	4692	0.7015	3	0	1092
SDHD	6392	NNAT	4826	0.6802	0	3	1321
ABCA1	19	NNAT	4826	0.8968	3	0	1550
SNRPN	6638	NNAT	4826	0.9994	3	0	1578
RASGRF1	5923	NNAT	4826	0.6802	3	0	1165
DDC	1644	NNAT	4826	0.6802	3	0	1026
DIRAS3	9077	NNAT	4826	0.6802	3	0	857
HTR2A	3356	NNAT	4826	0.6802	3	0	870
GATM	2628	NNAT	4826	0.7798	3	0	1344
ABCA1	19	OSBPL5	114879	0.8968	3	0	1332
IGF2	3481	OSBPL5	114879	0.8488	3	0	1159
MAGEL2	54551	PEG10	23089	0.759	3	0	609
GABRG3	2567	PEG3	5178	0.6893	3	0	426
ABCA1	19	PEG3	5178	0.8968	3	0	1225
KLF14	136259	PHLDA2	7262	0.7669	3	0	631
UBE3A	7337	PHLDA2	7262	0.9968	0	3	1557
PHLDA2	7262	PLAGL1	5325	0.9275	3	0	1473
MAGEL2	54551	PLAGL1	5325	0.9275	3	0	698
PEG3	5178	PLAGL1	5325	0.9275	3	0	1192
SLC38A4	55089	PLAGL1	5325	0.9275	3	0	591
SLC22A3	6581	PON2	5445	0.9469	3	0	522
NAP1L5	266812	PON2	5445	0.9469	3	0	1291
SLC38A4	55089	PON2	5445	0.9469	3	0	578
ZNF264	9422	PON2	5445	0.9469	3	0	1718
PEG10	23089	PON3	5446	0.759	3	0	978
SNURF	8926	PON3	5446	0.9848	3	0	1093
PHLDA2	7262	RASGRF1	5923	0.7669	3	0	1075
SLC22A18AS	5003	RASGRF1	5923	0.573	3	0	1146
PEG10	23089	RASGRF1	5923	0.759	3	0	1056
SNURF	8926	RASGRF1	5923	0.9848	3	0	1161
SLC22A18AS	5003	RBP5	83758	0.573	3	0	859
OSBPL5	114879	RBP5	83758	0.7015	3	0	932
SLC22A3	6581	SDHD	6392	0.6473	3	0	503
SGCE	8910	SDHD	6392	0.7054	3	0	1269
ABCA1	19	SGCE	8910	0.8968	3	3	1519
RASGRF1	5923	SLC22A18	5002	0.7927	3	0	1195
KCNK9	51305	SLC22A18	5002	0.7927	3	0	769
KCNQ1	3784	SLC22A18AS	5003	0.8249	3	0	1449
ABCA1	19	SLC38A4	55089	0.8968	3	0	595
GABRA5	2558	SNRPN	6638	0.9994	3	0	811
ZNF215	7762	SNURF	8926	0.9848	1	3	966
GABRA5	2558	SNURF	8926	0.9848	3	0	773
KCNQ1	3784	TFPI2	7980	0.8249	3	0	971
NDN	4692	TFPI2	7980	0.6488	3	0	915
PLAGL1	5325	TFPI2	7980	0.9275	3	0	1062
GABRB3	2562	TFPI2	7980	0.7013	3	0	827
INS	3630	TFPI2	7980	0.5899	0	3	478
KCNQ1	3784	TP73	7161	0.8249	3	0	1035
KCNQ1OT1	10984	TP73	7161	0.5919	3	0	860
KCNK9	51305	TRPM5	29850	0.3348	3	0	416
PPP1R9A	55607	UBE3A	7337	0.9968	3	2	1238
NAP1L5	266812	UBE3A	7337	0.9968	3	0	1307
PEG3	5178	UBE3A	7337	0.9968	3	0	1246
DLGAP2	9228	UBE3A	7337	0.9968	2	3	965
CDKN1C	1028	UBE3A	7337	0.9968	3	1	1790
INS	3630	UBE3A	7337	0.9968	0	3	722
NNAT	4826	USP29	57663	0.6802	3	0	423
GABRA5	2558	ZIM2	23619	0.4837	3	0	658
SLC22A18AS	5003	ZIM2	23619	0.573	3	0	1231
PEG10	23089	ZIM2	23619	0.759	3	0	1123
USP29	57663	ZIM2	23619	0.4384	3	0	395
GATM	2628	ZIM2	23619	0.7798	3	0	1101
PON3	5446	ZIM2	23619	0.463	3	0	871
PEG3	5178	ZNF264	9422	0.7315	3	0	1194
COPG2	26958	ZNF264	9422	0.7315	0	3	1281
MEG3	55384	ABCA1	19	0.8968	2	0	1403
KCNQ1	3784	ANKRD11	29123	0.8701	2	0	1359
CTNNA3	29119	ANKRD11	29123	0.8701	2	0	587
COPG2	26958	ANKRD11	29123	0.8701	0	2	1133
NDN	4692	ANKRD11	29123	0.8701	0	2	1283
SLC22A18	5002	ANKRD11	29123	0.8701	2	1	1538
BLCAP	10904	ANKRD11	29123	0.9016	2	0	1519
IGF2	3481	ANKRD11	29123	0.8701	2	0	1352
ATP10A	57194	ANKRD11	29123	0.8701	2	0	1315
DLGAP2	9228	ANKRD11	29123	0.8701	2	0	815
CDKN1C	1028	ANKRD11	29123	0.8912	2	0	1532
MEG3	55384	ANKRD11	29123	0.8701	0	2	1322
PPP1R9A	55607	ASB4	51666	0.6999	2	0	733
ABCA1	19	ASB4	51666	0.8968	2	0	966
PEG3	5178	ASB4	51666	0.6893	2	0	726
CTNNA3	29119	ASB4	51666	0.5122	2	0	416
COPG2	26958	ASB4	51666	0.5122	2	0	813
RASGRF1	5923	ASB4	51666	0.5308	2	0	769
PON2	5445	ASB4	51666	0.9469	2	0	953
SGCE	8910	ASB4	51666	0.7054	0	2	871
DIO3	1735	ASB4	51666	0.5122	2	0	700
ZIM3	114026	ASB4	51666	0.5122	2	0	303
SNURF	8926	ASB4	51666	0.9848	0	2	876
GABRB3	2562	ASB4	51666	0.7013	2	0	757
IGF2	3481	ASB4	51666	0.8488	2	0	860
HTR2A	3356	ASB4	51666	0.5122	2	0	636
GATM	2628	ASB4	51666	0.7798	2	0	840
TFPI2	7980	ASB4	51666	0.5899	2	0	644
TRPM5	29850	ASB4	51666	0.5122	2	0	325
GNAS	2778	ASB4	51666	0.9961	2	0	983
NAP1L5	266812	ASCL2	430	0.7173	2	0	1069
PEG3	5178	ASCL2	430	0.6893	2	0	774
DCN	1634	ASCL2	430	0.8406	0	2	971
SNRPN	6638	ASCL2	430	0.9994	2	2	1139
TRPM5	29850	ASCL2	430	0.4908	2	0	520
PPP1R9A	55607	ATP10A	57194	0.6999	2	0	949
SLC22A2	6582	ATP10A	57194	0.5452	2	0	459
SDHD	6392	ATP10A	57194	0.6473	0	2	1187
PEG10	23089	ATP10A	57194	0.759	1	2	1148
RASGRF1	5923	ATP10A	57194	0.5452	0	2	954
SGCE	8910	ATP10A	57194	0.7054	2	0	1099
SLC22A18	5002	ATP10A	57194	0.7927	2	0	1310
GRB10	2887	ATP10A	57194	0.9904	2	0	1313
IGF2	3481	ATP10A	57194	0.8488	2	0	1153
HTR2A	3356	ATP10A	57194	0.5452	2	0	753
GABRG3	2567	BLCAP	10904	0.9016	0	2	522
NAP1L5	266812	BLCAP	10904	0.9016	2	1	1265
SLC22A18	5002	BLCAP	10904	0.9016	2	2	1722
PLAGL1	5325	BLCAP	10904	0.9275	2	3	1670
GABRB3	2562	BLCAP	10904	0.9016	2	0	1122
IGF2	3481	BLCAP	10904	0.9016	2	0	1497
MEG3	55384	BLCAP	10904	0.9016	2	2	1389
SLC22A3	6581	CALCR	799	0.3637	2	0	316
PPP1R9A	55607	CALCR	799	0.6999	2	0	731
GABRA5	2558	CALCR	799	0.4837	2	0	513
KCNQ1OT1	10984	CALCR	799	0.4704	2	0	565
DCN	1634	CALCR	799	0.8406	2	0	858
SNRPN	6638	CALCR	799	0.9994	0	2	934
DIO3	1735	CALCR	799	0.3745	2	0	696
DDC	1644	CALCR	799	0.5863	2	0	645
TFPI2	7980	CALCR	799	0.5899	2	0	639
GNAS	2778	CALCR	799	0.9961	2	0	932
KLF14	136259	CDKN1C	1028	0.8912	2	0	688
PPP1R9A	55607	CDKN1C	1028	0.8912	2	0	1200
PHLDA2	7262	CDKN1C	1028	0.8912	10	2	1511
SLC22A18AS	5003	CDKN1C	1028	0.8912	2	0	1604
SNRPN	6638	CDKN1C	1028	0.9994	3	2	1717
ASCL2	430	CDKN1C	1028	0.8912	2	0	1100
SLC38A4	55089	CDKN1C	1028	0.8912	2	0	568
RASGRF1	5923	CDKN1C	1028	0.8912	0	2	1182
DIO3	1735	CDKN1C	1028	0.8912	4	2	1252
DDC	1644	CDKN1C	1028	0.8912	2	0	1086
SNURF	8926	CDKN1C	1028	0.9848	3	2	1677
GABRB3	2562	CDKN1C	1028	0.8912	2	0	1138
TP73	7161	CDKN1C	1028	0.8912	2	0	1084
DCN	1634	COPG2	26958	0.8406	2	0	1134
NNAT	4826	COPG2	26958	0.6802	2	0	1175
SLC22A3	6581	CPA4	51200	0.6598	2	0	420
PPP1R9A	55607	CPA4	51200	0.6999	0	2	1028
GABRA5	2558	CPA4	51200	0.6598	2	0	665
SDHD	6392	CPA4	51200	0.6598	0	2	1159
MAGEL2	54551	CPA4	51200	0.6598	2	0	557
MKRN3	7681	CPA4	51200	0.6598	2	0	219
NDN	4692	CPA4	51200	0.6598	2	0	1188
PON2	5445	CPA4	51200	0.9469	0	2	1349
SGCE	8910	CPA4	51200	0.7054	2	0	1189
PLAGL1	5325	CPA4	51200	0.9275	2	0	1314
DLX5	1749	CPA4	51200	0.6598	2	0	652
GRB10	2887	CPA4	51200	0.9904	2	2	1368
USP29	57663	CPA4	51200	0.6598	2	0	409
GABRB3	2562	CPA4	51200	0.7013	2	0	920
IGF2-AS	51214	CPA4	51200	0.6598	2	0	812
DIRAS3	9077	CPA4	51200	0.6598	2	0	751
UBE3A	7337	CPA4	51200	0.9968	0	2	1381
KLF14	136259	CTNNA3	29119	0.3856	2	0	367
PPP1R9A	55607	CTNNA3	29119	0.6999	2	0	495
KCNQ1	3784	CTNNA3	29119	0.8249	2	0	587
SLC22A3	6581	DCN	1634	0.8406	2	0	480
KCNQ1OT1	10984	DCN	1634	0.8406	2	0	874
PEG10	23089	DCN	1634	0.8406	2	2	1297
SLC22A18	5002	DCN	1634	0.8406	2	0	1479
TP73	7161	DCN	1634	0.8406	2	0	986
PHLDA2	7262	DDC	1644	0.7669	2	0	973
GABRG3	2567	DDC	1644	0.5863	2	0	370
NAP1L5	266812	DDC	1644	0.7173	2	0	888
MKRN3	7681	DDC	1644	0.5863	2	0	230
PEG3	5178	DDC	1644	0.6893	2	0	804
DCN	1634	DDC	1644	0.8406	2	0	952
PEG10	23089	DDC	1644	0.759	2	0	969
RASGRF1	5923	DDC	1644	0.5863	2	0	869
KCNK9	51305	DDC	1644	0.5863	2	0	568
KCNQ1DN	55539	DDC	1644	0.5863	2	0	680
KLF14	136259	DIO3	1735	0.3856	2	0	585
GABRG3	2567	DIO3	1735	0.3745	2	0	432
KCNQ1	3784	DIO3	1735	0.8249	2	0	1167
SNRPN	6638	DIO3	1735	0.9994	2	0	1276
ASCL2	430	DIO3	1735	0.4908	2	0	887
NDN	4692	DIO3	1735	0.6488	2	0	1080
KCNK9	51305	DIO3	1735	0.3745	2	0	661
SLC22A18	5002	DIO3	1735	0.7927	0	2	1276
L3MBTL1	26013	DIRAS3	9077	0.6617	2	0	818
PHLDA2	7262	DIRAS3	9077	0.7669	2	0	849
ABCA1	19	DIRAS3	9077	0.8968	2	0	909
DCN	1634	DIRAS3	9077	0.8406	2	0	815
SLC38A4	55089	DIRAS3	9077	0.4023	2	0	466
DIO3	1735	DIRAS3	9077	0.4023	2	0	711
BLCAP	10904	DIRAS3	9077	0.9016	2	0	891
DDC	1644	DIRAS3	9077	0.5863	2	0	624
PPP1R9A	55607	DLGAP2	9228	0.6999	2	0	720
PHLDA2	7262	DLGAP2	9228	0.7669	2	0	807
PEG3	5178	DLGAP2	9228	0.6893	2	0	709
KCNQ1OT1	10984	DLGAP2	9228	0.4726	2	0	483
SNRPN	6638	DLGAP2	9228	0.9994	2	0	953
SLC38A4	55089	DLGAP2	9228	0.4726	2	0	321
RASGRF1	5923	DLGAP2	9228	0.5308	2	0	752
SLC22A18	5002	DLGAP2	9228	0.7927	2	0	937
DIO3	1735	DLGAP2	9228	0.4726	2	0	773
IGF2	3481	DLGAP2	9228	0.8488	2	0	889
SLC22A3	6581	DLK1	8788	0.4306	2	0	358
PHLDA2	7262	DLK1	8788	0.7669	2	0	925
GABRA5	2558	DLK1	8788	0.4837	2	0	588
NAP1L5	266812	DLK1	8788	0.7173	2	0	794
KCNQ1OT1	10984	DLK1	8788	0.4704	2	0	544
SNRPN	6638	DLK1	8788	0.9994	2	0	1023
COPG2	26958	DLK1	8788	0.4363	2	0	770
NDN	4692	DLK1	8788	0.6488	2	0	890
SGCE	8910	DLK1	8788	0.7054	2	0	959
DLX5	1749	DLK1	8788	0.4306	2	0	560
GRB10	2887	DLK1	8788	0.9904	2	0	1059
RTL1	388015	DLK1	8788	0.4306	2	0	132
SNURF	8926	DLK1	8788	0.9848	2	0	987
GABRB3	2562	DLK1	8788	0.7013	2	0	800
HTR2A	3356	DLK1	8788	0.4563	2	0	648
ATP10A	57194	DLK1	8788	0.5452	2	0	751
TFPI2	7980	DLK1	8788	0.5899	2	0	680
ASB4	51666	DLK1	8788	0.5122	2	0	631
PEG3	5178	DLX5	1749	0.6893	2	0	610
SNRPN	6638	DLX5	1749	0.9994	0	2	768
RASGRF1	5923	DLX5	1749	0.5308	2	0	602
SGCE	8910	DLX5	1749	0.7054	0	2	717
BLCAP	10904	DLX5	1749	0.9016	2	0	746
ZIM3	114026	DLX5	1749	0.4191	2	0	199
GABRB3	2562	DLX5	1749	0.7013	2	0	624
ZNF215	7762	GABRA5	2558	0.4837	2	0	484
IGF2	3481	GABRA5	2558	0.8488	2	0	730
SLC22A3	6581	GABRB3	2562	0.7013	2	0	437
KCNQ1	3784	GABRB3	2562	0.8249	2	0	1055
H19	283120	GABRB3	2562	0.7013	2	0	954
DCN	1634	GABRB3	2562	0.8406	0	2	1009
SLC38A4	55089	GABRB3	2562	0.7013	2	0	523
PON2	5445	GABRB3	2562	0.9469	0	2	1154
TFPI2	7980	GABRG3	2567	0.5899	2	0	359
GNAS	2778	GABRG3	2567	0.9961	2	0	541
SLC22A3	6581	GATM	2628	0.7798	2	0	493
KLF14	136259	GATM	2628	0.7798	0	2	568
H19	283120	GATM	2628	0.7798	2	0	1003
GABRA5	2558	GATM	2628	0.7798	2	0	722
DDC	1644	GATM	2628	0.7798	14	2	947
ZNF215	7762	GNAS	2778	0.9961	0	2	959
KCNQ1	3784	GNAS	2778	0.9961	2	0	1563
SDHD	6392	GNAS	2778	0.9961	2	6	1433
NAP1L5	266812	GNAS	2778	0.9961	2	0	1276
MAGEL2	54551	GNAS	2778	0.9961	2	0	704
ASCL2	430	GNAS	2778	0.9961	2	0	1102
NDN	4692	GNAS	2778	0.9961	2	0	1463
RASGRF1	5923	GNAS	2778	0.9961	2	0	1209
GRB10	2887	GNAS	2778	0.9961	2	0	1778
USP29	57663	GNAS	2778	0.9961	2	0	444
DDC	1644	GNAS	2778	0.9961	2	0	1102
SNURF	8926	GNAS	2778	0.9961	22	2	1696
GABRB3	2562	GNAS	2778	0.9961	2	0	1145
TP73	7161	GNAS	2778	0.9961	2	0	1078
TFPI2	7980	GNAS	2778	0.9961	0	2	1076
NNAT	4826	GNAS	2778	0.9961	2	0	1579
ZNF215	7762	GNAS-AS1	149775	0.3444	2	0	223
NAP1L5	266812	GRB10	2887	0.9904	2	0	1289
NDN	4692	GRB10	2887	0.9904	2	2	1495
PEG10	23089	GRB10	2887	0.9904	2	0	1489
PON2	5445	GRB10	2887	0.9904	2	0	1787
KCNK9	51305	GRB10	2887	0.9904	2	0	762
SLC22A18	5002	GRB10	2887	0.9904	2	1	1740
NNAT	4826	GRB10	2887	0.9904	2	2	1600
PHLDA2	7262	H19	283120	0.7669	2	0	1049
RTL1	388015	H19	283120	0.5197	2	0	144
DIO3	1735	HTR2A	3356	0.4563	2	0	666
PLAGL1	5325	HTR2A	3356	0.9275	2	0	937
BLCAP	10904	HTR2A	3356	0.9016	2	0	925
DLX5	1749	HTR2A	3356	0.4563	2	0	440
DIRAS3	9077	HTR2A	3356	0.4563	2	0	542
PHLDA2	7262	IGF2	3481	0.8488	2	0	1368
SLC22A2	6582	IGF2	3481	0.8488	2	0	517
PON1	5444	IGF2	3481	0.8488	2	0	536
ASCL2	430	IGF2	3481	0.8488	2	0	977
RASGRF1	5923	IGF2	3481	0.8488	2	0	1085
SGCE	8910	IGF2	3481	0.8488	2	0	1382
SLC22A18	5002	IGF2	3481	0.8488	0	2	1512
PLAGL1	5325	IGF2	3481	0.9275	17	2	1493
DLX5	1749	IGF2	3481	0.8488	2	0	746
GABRB3	2562	IGF2	3481	0.8488	2	0	1048
INS	3630	IGF2	3481	0.8488	2	0	657
ZNF215	7762	IGF2-AS	51214	0.4814	0	2	672
KCNQ1	3784	IGF2-AS	51214	0.8249	2	0	961
SDHD	6392	IGF2-AS	51214	0.6473	0	2	803
PEG3	5178	IGF2-AS	51214	0.6893	2	0	645
DCN	1634	IGF2-AS	51214	0.8406	2	0	846
SNRPN	6638	IGF2-AS	51214	0.9994	2	0	1023
COPG2	26958	IGF2-AS	51214	0.4814	2	0	782
PON2	5445	IGF2-AS	51214	0.9469	0	2	967
GABRB3	2562	IGF2-AS	51214	0.7013	2	0	673
SLC22A3	6581	INS	3630	0.3614	0	2	191
TCEB3C	162699	INS	3630	0.3614	2	0	264
KCNK9	51305	INS	3630	0.3614	2	0	475
DIO3	1735	INS	3630	0.3745	2	0	582
KCNQ1DN	55539	INS	3630	0.4114	2	0	414
IGF2-AS	51214	INS	3630	0.4814	2	0	531
MEG3	55384	INS	3630	0.736	2	0	563
SLC38A4	55089	KCNK9	51305	0.3815	2	0	314
PON2	5445	KCNK9	51305	0.9469	0	2	756
PON3	5446	KCNK9	51305	0.463	2	0	522
ZIM2	23619	KCNK9	51305	0.4384	2	0	631
PPP1R9A	55607	KCNQ1	3784	0.8249	2	0	1081
ZNF264	9422	KCNQ1	3784	0.8249	0	2	1523
TCEB3C	162699	KCNQ1OT1	10984	0.4704	2	0	248
ABCA1	19	KCNQ1OT1	10984	0.8968	2	0	940
RASGRF1	5923	L3MBTL1	26013	0.6617	2	0	1101
PLAGL1	5325	L3MBTL1	26013	0.9275	2	0	1483
SLC22A3	6581	MEG3	55384	0.736	2	0	488
ASCL2	430	MEG3	55384	0.736	2	0	983
COPG2	26958	MEG3	55384	0.736	3	2	1127
SGCE	8910	MEG3	55384	0.736	2	0	1253
DIO3	1735	MEG3	55384	0.736	2	0	1114
ZIM3	114026	MEG3	55384	0.736	2	0	294
GRB10	2887	MEG3	55384	0.9904	2	0	1441
DDC	1644	MEG3	55384	0.736	2	0	968
NAP1L4	4676	MEG3	55384	0.7802	0	2	1206
ATP10A	57194	MEG3	55384	0.736	2	0	1168
RBP5	83758	MEG3	55384	0.736	2	0	868
TRPM5	29850	MEG3	55384	0.736	2	0	522
PPP1R9A	55607	MEST	4232	0.6999	2	0	1079
GABRG3	2567	MEST	4232	0.5344	2	0	440
GABRA5	2558	MEST	4232	0.5344	2	0	696
SDHD	6392	MEST	4232	0.6473	2	0	1380
MAGEL2	54551	MEST	4232	0.5344	2	0	568
SLC38A4	55089	MEST	4232	0.5344	2	0	477
DDC	1644	MEST	4232	0.5863	2	0	969
GATM	2628	MEST	4232	0.7798	2	0	1321
NNAT	4826	MEST	4232	0.6802	2	0	1405
SLC22A18AS	5003	MESTIT1	317751	0.573	2	0	122
PHLDA2	7262	NAP1L4	4676	0.7802	0	2	1317
SDHD	6392	NAP1L4	4676	0.7802	2	3	1413
NAP1L5	266812	NAP1L4	4676	0.7802	0	2	1051
PEG10	23089	NAP1L4	4676	0.7802	2	0	1290
PON2	5445	NAP1L4	4676	0.9469	0	2	1530
SGCE	8910	NAP1L4	4676	0.7802	0	2	1311
L3MBTL1	26013	NAP1L5	266812	0.7173	0	2	1180
HYMAI	57061	NDN	4692	0.6488	2	0	800
H19	283120	NDN	4692	0.6488	2	0	974
ASCL2	430	NDN	4692	0.6488	2	0	906
GABRG3	2567	NNAT	4826	0.6802	2	0	528
KCNQ1	3784	NNAT	4826	0.8249	2	0	1457
H19	283120	NNAT	4826	0.6802	2	0	1108
SLC22A18AS	5003	NNAT	4826	0.6802	2	0	1464
DCN	1634	NNAT	4826	0.8406	2	0	1352
CTNNA3	29119	NNAT	4826	0.6802	2	0	622
NDN	4692	NNAT	4826	0.6802	2	0	1345
SLC38A4	55089	NNAT	4826	0.6802	2	0	564
PON2	5445	NNAT	4826	0.9469	2	1	1581
SNURF	8926	NNAT	4826	0.9848	2	0	1534
DLGAP2	9228	NNAT	4826	0.6802	2	0	899
GABRA5	2558	OSBPL5	114879	0.7015	2	0	694
SDHD	6392	OSBPL5	114879	0.7015	0	2	1027
NAP1L5	266812	OSBPL5	114879	0.7173	2	0	1292
RASGRF1	5923	OSBPL5	114879	0.7015	2	0	1070
KCNQ1DN	55539	OSBPL5	114879	0.7015	2	0	741
DDC	1644	OSBPL5	114879	0.7015	2	0	921
PON3	5446	OSBPL5	114879	0.7015	2	0	859
L3MBTL1	26013	PEG10	23089	0.759	2	0	1338
NAP1L5	266812	PEG10	23089	0.759	2	0	1127
ABCA1	19	PEG10	23089	0.8968	0	2	1450
KCNQ1OT1	10984	PEG10	23089	0.759	2	0	880
UBE3A	7337	PEG10	23089	0.9968	2	2	1500
SLC22A3	6581	PEG3	5178	0.6893	2	0	466
H19	283120	PEG3	5178	0.6893	2	0	853
PON1	5444	PEG3	5178	0.6893	2	0	460
GABRA5	2558	PEG3	5178	0.6893	2	0	675
MAGEL2	54551	PEG3	5178	0.6893	2	0	584
RASGRF1	5923	PEG3	5178	0.6893	2	2	860
KCNQ1	3784	PLAGL1	5325	0.9275	2	0	1517
PEG10	23089	PLAGL1	5325	0.9275	2	2	1415
PON2	5445	PLAGL1	5325	0.9469	9	2	1704
PON2	5445	PON1	5444	0.9469	2	0	561
HYMAI	57061	PON2	5445	0.9469	2	0	867
H19	283120	PON2	5445	0.9469	2	0	1165
SLC22A18AS	5003	PON2	5445	0.9469	2	0	1611
PEG3	5178	PON2	5445	0.9469	0	2	1223
PPP1R9A	55607	PON3	5446	0.6999	2	0	868
SDHD	6392	PON3	5446	0.6473	2	0	903
ABCA1	19	PON3	5446	0.8968	2	0	1119
SLC22A18AS	5003	PON3	5446	0.573	2	0	1073
DCN	1634	PON3	5446	0.8406	2	0	1025
SGCE	8910	PON3	5446	0.7054	2	0	1041
PLAGL1	5325	PON3	5446	0.9275	2	0	1084
SDHD	6392	PPP1R9A	55607	0.6999	2	0	998
KCNQ1	3784	RASGRF1	5923	0.8249	2	0	1137
MAGEL2	54551	RASGRF1	5923	0.5308	2	0	561
ABCA1	19	RASGRF1	5923	0.8968	0	2	1187
KCNQ1OT1	10984	RASGRF1	5923	0.5308	2	0	793
ASCL2	430	RASGRF1	5923	0.5308	2	0	928
NDN	4692	RASGRF1	5923	0.6488	0	2	1002
SLC38A4	55089	RASGRF1	5923	0.5308	2	0	479
KCNQ1OT1	10984	RBP5	83758	0.4704	2	0	606
SNRPN	6638	RBP5	83758	0.9994	0	2	963
BLCAP	10904	RBP5	83758	0.9016	0	2	894
SNURF	8926	RBP5	83758	0.9848	0	2	925
GATM	2628	RBP5	83758	0.7798	2	0	781
SNRPN	6638	RTL1	388015	0.9994	2	0	188
SNURF	8926	SDHD	6392	0.9848	0	2	1394
ZNF215	7762	SGCE	8910	0.7054	0	2	871
PEG3	5178	SGCE	8910	0.7054	2	0	1120
ASCL2	430	SGCE	8910	0.7054	0	2	968
SLC22A3	6581	SLC22A18	5002	0.7927	2	0	508
H19	283120	SLC22A18	5002	0.7927	2	2	1147
PEG3	5178	SLC22A18	5002	0.7927	2	0	1174
SNRPN	6638	SLC22A18	5002	0.9994	2	2	1731
SGCE	8910	SLC22A18	5002	0.7927	0	2	1514
SNURF	8926	SLC22A18	5002	0.9848	2	2	1688
KLF14	136259	SLC22A18AS	5003	0.573	2	0	651
SLC22A3	6581	SLC22A2	6582	0.3212	2	0	191
GABRA5	2558	SLC38A4	55089	0.4837	2	0	385
PHLDA2	7262	SNORD64	347686	0.7669	0	2	90
SDHD	6392	SNRPN	6638	0.9994	0	2	1421
PEG3	5178	SNRPN	6638	0.9994	12	2	1223
TFPI2	7980	SNRPN	6638	0.9994	2	2	1109
KCNQ1	3784	SNURF	8926	0.9848	2	0	1509
SNRPN	6638	SNURF	8926	0.9994	551	2	1797
DLX5	1749	SNURF	8926	0.9848	0	2	737
ZIM2	23619	SNURF	8926	0.9848	2	0	1295
SLC22A3	6581	TFPI2	7980	0.5899	2	0	438
PPP1R9A	55607	TFPI2	7980	0.6999	2	0	841
PEG3	5178	TFPI2	7980	0.6893	2	0	824
DDC	1644	TFPI2	7980	0.5899	0	2	753
SNURF	8926	TFPI2	7980	0.9848	2	2	1068
ZNF264	9422	TFPI2	7980	0.7315	2	0	1054
HTR2A	3356	TFPI2	7980	0.5899	2	0	584
GATM	2628	TFPI2	7980	0.7798	2	0	932
PON3	5446	TFPI2	7980	0.5899	2	0	768
L3MBTL1	26013	TP73	7161	0.6617	2	0	1019
PHLDA2	7262	TP73	7161	0.7669	2	0	986
H19	283120	TP73	7161	0.5919	2	0	986
SNRPN	6638	TP73	7161	0.9994	2	2	1133
ASCL2	430	TP73	7161	0.5919	2	0	875
COPG2	26958	TP73	7161	0.5919	2	0	1007
NAP1L4	4676	TP73	7161	0.7802	2	0	1047
KLF14	136259	TRPM5	29850	0.3856	2	0	472
PHLDA2	7262	TRPM5	29850	0.7669	2	0	501
SGCE	8910	TRPM5	29850	0.7054	0	2	452
TP73	7161	TRPM5	29850	0.5919	2	0	534
H19	283120	UBE3A	7337	0.9968	0	2	1184
GABRA5	2558	UBE3A	7337	0.9968	2	2	810
SLC22A18AS	5003	UBE3A	7337	0.9968	0	2	1655
DCN	1634	UBE3A	7337	0.9968	2	0	1515
CTNNA3	29119	UBE3A	7337	0.9968	2	2	630
RASGRF1	5923	UBE3A	7337	0.9968	2	0	1231
DIO3	1735	UBE3A	7337	0.9968	0	2	1297
TP73	7161	UBE3A	7337	0.9968	2	0	1120
DIRAS3	9077	UBE3A	7337	0.9968	2	0	919
GATM	2628	UBE3A	7337	0.9968	2	2	1509
OSBPL5	114879	UBE3A	7337	0.9968	2	0	1360
TRPM5	29850	UBE3A	7337	0.9968	2	0	548
KCNQ1	3784	USP29	57663	0.8249	2	0	383
DLX5	1749	USP29	57663	0.4191	2	0	264
GRB10	2887	USP29	57663	0.9904	2	0	427
GABRG3	2567	ZIM2	23619	0.4384	2	0	398
SLC22A2	6582	ZIM2	23619	0.4384	2	0	469
NAP1L5	266812	ZIM2	23619	0.7173	2	0	970
KCNQ1OT1	10984	ZIM2	23619	0.4704	2	0	799
DCN	1634	ZIM2	23619	0.8406	2	0	1187
SNRPN	6638	ZIM2	23619	0.9994	2	0	1327
CTNNA3	29119	ZIM2	23619	0.4384	2	0	568
RASGRF1	5923	ZIM2	23619	0.5308	2	0	934
DIO3	1735	ZIM2	23619	0.4384	2	0	1008
HTR2A	3356	ZIM2	23619	0.4563	2	0	790
DLGAP2	9228	ZIM2	23619	0.4726	2	0	754
RASGRF1	5923	ZIM3	114026	0.5308	2	0	318
KCNK9	51305	ZIM3	114026	0.2856	2	0	250
L3MBTL1	26013	ZNF264	9422	0.7315	2	0	1517
ZNF215	7762	ZNF264	9422	0.7315	0	2	971
NAP1L5	266812	ZNF264	9422	0.7315	2	0	1283
SNRPN	6638	ZNF264	9422	0.9994	2	0	1723
DDC	1644	ZNF264	9422	0.7315	0	2	1080
