# Supplementary material for: A systems-level approach to parental genomic imprinting: the imprinted gene network includes extracellular matrix genes and regulates cell cycle exit and differentiation
Source: HighWire-hosted journal article supplement (doi:10.1101/gr.175919.114), 2015-01-22
Supplement: Table_S7.xlsx [file Table_S7.xlsx]

## Sheet: Rn_IGs
Symbol	Gene ID	Imprinting Status
Ampd3	25095	Unknown
Art5	259167	Unknown
Asb4	500017	Unknown	No Affy data in COXPRESdb
Ascl2	24209	Unknown
Axl	308444	Unknown	No Affy data in COXPRESdb
Begain	79146	Unknown
Blcap	171113	Unknown
Calcr	116506	Unknown
Cd81	25621	Unknown
Cdkn1c	246060	Unknown
Cmah	361245	Unknown
Cntn3	54279	Unknown
Cobl	305497	Unknown
Commd1	534683	Unknown	No Affy data in COXPRESdb
Copg2	301742	Unknown
Dcn	29139	Unknown
Ddc	24311	Unknown
Dhcr7	64191	Unknown
Dio3	29475	Unknown
Dlk1	114587	Unknown
Dlx5	25431	Unknown
Drd1a	24316	Unknown
Fbxo40	363790	Unknown	No Affy data in COXPRESdb
Gatm	81660	Unknown
Gnas	24896	Unknown
Gpr1	25457	Unknown
Grb10	498416	Unknown
H19	309122	Maternal	No Affy data in COXPRESdb
Hm13	311545	Unknown
Htr2a	29595	Unknown
Igf2	24483	Paternal
Igf2r	25151	Maternal
Impact	497198	Paternal
Ins2	24506	Unknown
Kcnk9	84429	Unknown
Kcnq1	84020	Unknown
Klf14	312203	Unknown	No Affy data in COXPRESdb
Magel2	679875	Unknown	No Affy data in COXPRESdb
Mcts2	689500	Unknown
Mest	58827	Unknown	No Affy data in COXPRESdb
Mkrn3	292988	Unknown	No Affy data in COXPRESdb
Mst1r	300999	Unknown	No Affy data in COXPRESdb
Nap1l4	361684	Unknown
Nap1l5	688843	Unknown
Ndn	308690	Unknown
Nnat	94270	Unknown
Osbpl5	361686	Unknown
Pde4d	24627	Unknown
Peg10	678843	Unknown
Peg12	308692	Unknown	No Affy data in COXPRESdb
Peg3	246361	Unknown	No Affy data in COXPRESdb
Phlda2	293637	Unknown
Plagl1	25157	Unknown
Pon2	296851	Unknown
Pon3	312086	Unknown
Ppp1r9a	84685	Unknown
Qpct	83621	Unknown	No Affy data in COXPRESdb
Rasgrf1	192213	Paternal
Rtl1	314581	Unknown	No Affy data in COXPRESdb
Scin	298975	Unknown
Sfmbt2	307106	Maternal	No Affy data in COXPRESdb
Sgce	432360	Unknown
Slc22a18	309131	Unknown
Slc22a2	29503	Unknown
Slc22a3	29504	Unknown
Slc38a4	170573	Unknown
Snrpn	81781	Unknown
Snurf	113938	Unknown	No Affy data in COXPRESdb
Tfpi2	286926	Unknown
Th	25085	Unknown
Trappc9	315059	Unknown
Tspan32	685765	Unknown	No Affy data in COXPRESdb
Tssc4	361682	Unknown
Ube3a	361585	Unknown
Usp29	361495	Unknown
Wt1	24883	Unknown
Zdbf2	501153	Unknown	No Affy data in COXPRESdb
Zim1	308322	Unknown	No Affy data in COXPRESdb
Zrsr1	498425	Unknown
