# Supplementary material for: A systems-level approach to parental genomic imprinting: the imprinted gene network includes extracellular matrix genes and regulates cell cycle exit and differentiation
Source: HighWire-hosted journal article supplement (doi:10.1101/gr.175919.114), 2015-01-22
Supplement: Table_S8.xlsx [file Table_S8.xlsx]

## Sheet: COXPRESdb
Symbol_1	Gene ID_1	Symbol_2	Gene ID_2	Mutual Rank
Plagl1	25157	Copg2	301742	2.24
Th	25085	Calcr	116506	2.45
Plagl1	25157	Nnat	94270	4.69
Th	25085	Dlk1	114587	5.57
Scin	298975	Cmah	361245	5.74
Ndn	308690	Grb10	498416	11.49
Plagl1	25157	Cdkn1c	246060	12.12
Calcr	116506	Usp29	361495	21.49
Nnat	94270	Ndn	308690	21.73
Th	25085	Usp29	361495	23.66
Plagl1	25157	Grb10	498416	26.83
Nnat	94270	Copg2	301742	29.66
Blcap	171113	Tssc4	361682	41.71
Dlk1	114587	Calcr	116506	42
Drd1a	24316	Dlx5	25431	46.35
Slc22a18	309131	Pon3	312086	49.89
Ndn	308690	Sgce	432360	53.04
Nnat	94270	Sgce	432360	53.58
Cntn3	54279	Usp29	361495	59.48
Plagl1	25157	Sgce	432360	65.5
Gnas	24896	Cd81	25621	66.67
Blcap	171113	Ube3a	361585	68.08
Cntn3	54279	Rasgrf1	192213	84.71
Dcn	29139	Sgce	432360	95.92
Wt1	24883	Grb10	498416	98.39
Plagl1	25157	Osbpl5	361686	100.74
Slc22a3	29504	Sgce	432360	103.83
Nnat	94270	Grb10	498416	111.09
Cd81	25621	Pon2	296851	122.8
Snrpn	81781	Nap1l5	688843	128.99
Osbpl5	361686	Grb10	498416	132.34
Rasgrf1	192213	Usp29	361495	134.84
Pde4d	24627	Zrsr1	498425	139.66
Igf2	24483	Gatm	81660	148.86
Gpr1	25457	Kcnk9	84429	153.08
Igf2	24483	Cdkn1c	246060	156.56
Impact	497198	Zrsr1	498425	160.44
Rasgrf1	192213	Nap1l5	688843	171.06
Igf2	24483	Peg10	678843	174.1
Cdkn1c	246060	Osbpl5	361686	174.71
Sgce	432360	Grb10	498416	176
Nnat	94270	Osbpl5	361686	182.83
Dhcr7	64191	Pon2	296851	185.73
Ndn	308690	Osbpl5	361686	201.49
Cdkn1c	246060	Sgce	432360	203.16
Drd1a	24316	Cntn3	54279	205.41
Nnat	94270	Cdkn1c	246060	206.43
Gnas	24896	Igf2r	25151	206.44
Slc22a2	29503	Kcnq1	84020	208.57
Ampd3	25095	Osbpl5	361686	218.57
Ppp1r9a	84685	Usp29	361495	227.68
Pon2	296851	Pon3	312086	227.68
Osbpl5	361686	Sgce	432360	228.97
Dcn	29139	Cdkn1c	246060	238.34
Ddc	24311	Slc22a18	309131	254.29
Drd1a	24316	Rasgrf1	192213	257.81
Slc38a4	170573	Pon3	312086	275.66
Snrpn	81781	Rasgrf1	192213	287.06
Snrpn	81781	Ndn	308690	289.42
Plagl1	25157	Ndn	308690	301.6
Igf2	24483	Htr2a	29595	303.17
Ube3a	361585	Impact	497198	306.09
Th	25085	Rasgrf1	192213	316.16
Plagl1	25157	Dlk1	114587	316.39
Ddc	24311	Calcr	116506	320.65
Dlk1	114587	Usp29	361495	326.1
Slc22a3	29504	Cmah	361245	329.66
Plagl1	25157	Dcn	29139	331.3
Igf2	24483	Hm13	311545	336.88
Zrsr1	498425	Nap1l5	688843	341.91
Pde4d	24627	Ppp1r9a	84685	343.29
Plagl1	25157	Slc22a3	29504	351.27
Impact	497198	Grb10	498416	353.53
Phlda2	293637	Slc22a18	309131	354.05
Pde4d	24627	Grb10	498416	359.28
Slc22a3	29504	Nnat	94270	368.55
Dhcr7	64191	Slc22a18	309131	376.64
Igf2	24483	Ins2	24506	378.52
Impact	497198	Nap1l5	688843	380.56
Dcn	29139	Grb10	498416	382.96
Ndn	308690	Impact	497198	387.7
Ube3a	361585	Tssc4	361682	389.03
Cdkn1c	246060	Copg2	301742	395.97
Phlda2	293637	Scin	298975	410.42
Slc22a3	29504	Osbpl5	361686	424.9
Cdkn1c	246060	Ndn	308690	438.51
Slc38a4	170573	Slc22a18	309131	445.6
Ampd3	25095	Rasgrf1	192213	462.93
Ndn	308690	Nap1l5	688843	469.39
Dlx5	25431	Rasgrf1	192213	475.12
Copg2	301742	Sgce	432360	480.95
Art5	259167	Cobl	305497	491.9
Gnas	24896	Ndn	308690	495.58
Htr2a	29595	Peg10	678843	499.87
Slc22a2	29503	Slc22a18	309131	499.89
Cd81	25621	Gatm	81660	506.41
Copg2	301742	Nap1l4	361684	507.18
Igf2	24483	Gpr1	25457	508.74
Begain	79146	Dlk1	114587	510.86
Pon2	296851	Slc22a18	309131	515.46
Cdkn1c	246060	Grb10	498416	538
Ube3a	361585	Grb10	498416	539.87
Pde4d	24627	Ube3a	361585	557.18
Dcn	29139	Osbpl5	361686	569.49
Slc22a2	29503	Scin	298975	569.71
Gpr1	25457	Cobl	305497	573.1
Kcnk9	84429	Usp29	361495	578.1
Gpr1	25457	Calcr	116506	588.24
Drd1a	24316	Usp29	361495	594.3
Usp29	361495	Nap1l5	688843	601.25
Igf2	24483	Kcnk9	84429	615.07
Htr2a	29595	Kcnk9	84429	616.92
Ddc	24311	Slc22a2	29503	630
Wt1	24883	Plagl1	25157	630.8
Igf2	24483	Begain	79146	638.5
Ampd3	25095	Scin	298975	642.73
Hm13	311545	Usp29	361495	644.46
Gpr1	25457	Hm13	311545	644.75
Kcnk9	84429	Hm13	311545	646.38
Dlx5	25431	Slc22a3	29504	649.5
Th	25085	Kcnk9	84429	653.34
Begain	79146	Kcnk9	84429	661.56
Snrpn	81781	Zrsr1	498425	677.19
Ampd3	25095	Zrsr1	498425	686.93
Dcn	29139	Tfpi2	286926	687.01
Hm13	311545	Tssc4	361682	687.13
Igf2	24483	Ppp1r9a	84685	694.99
Kcnk9	84429	Calcr	116506	696.21
Cd81	25621	Sgce	432360	701.94
Th	25085	Peg10	678843	711.6
Pde4d	24627	Art5	259167	714.19
Calcr	116506	Nap1l5	688843	725.14
Igf2	24483	Dio3	29475	735.14
Ppp1r9a	84685	Hm13	311545	735.2
Slc22a2	29503	Phlda2	293637	758.1
Pde4d	24627	Htr2a	29595	760.32
Gatm	81660	Ppp1r9a	84685	763.16
Calcr	116506	Rasgrf1	192213	763.85
Gnas	24896	Dcn	29139	766.1
Copg2	301742	Ndn	308690	772.93
Igf2r	25151	Grb10	498416	793.3
Cd81	25621	Ndn	308690	795.94
Plagl1	25157	Tfpi2	286926	797.38
Cd81	25621	Cdkn1c	246060	802.85
Gpr1	25457	Cntn3	54279	805.85
Drd1a	24316	Nap1l5	688843	811.06
Dcn	29139	Slc22a3	29504	815.34
Drd1a	24316	Snrpn	81781	820.57
Blcap	171113	Impact	497198	824.02
Ampd3	25095	Snrpn	81781	825.2
Cd81	25621	Dhcr7	64191	828.9
Htr2a	29595	Cntn3	54279	832.45
Copg2	301742	Grb10	498416	836.42
Gnas	24896	Rasgrf1	192213	838.38
Ascl2	24209	Kcnk9	84429	840
Slc22a3	29504	Ndn	308690	850.37
Phlda2	293637	Cmah	361245	852.05
Gnas	24896	Snrpn	81781	854.57
Ins2	24506	Gpr1	25457	859.19
Drd1a	24316	Htr2a	29595	863.33
Igf2r	25151	Cd81	25621	863.5
Dhcr7	64191	Hm13	311545	864.38
Wt1	24883	Tfpi2	286926	879.09
Gatm	81660	Hm13	311545	881.09
Ddc	24311	Th	25085	901.92
Igf2	24483	Plagl1	25157	913.39
Gnas	24896	Nnat	94270	922.75
Drd1a	24316	Dio3	29475	924.14
Slc38a4	170573	Art5	259167	937.53
Slc22a3	29504	Cdkn1c	246060	949.96
Cntn3	54279	Kcnk9	84429	950.77
Snrpn	81781	Usp29	361495	951.36
Ampd3	25095	Grb10	498416	955.07
Igf2r	25151	Dcn	29139	955.14
Gnas	24896	Th	25085	959.97
Gnas	24896	Grb10	498416	980.18
Pde4d	24627	Cobl	305497	1000.69
Ascl2	24209	Htr2a	29595	1001.03
Gatm	81660	Peg10	678843	1013.67
Pde4d	24627	Blcap	171113	1014.09
Rasgrf1	192213	Ndn	308690	1019.99
Cntn3	54279	Nap1l5	688843	1020.49
Igf2	24483	Cobl	305497	1024.03
Cd81	25621	Dcn	29139	1036
Gpr1	25457	Htr2a	29595	1042.57
Htr2a	29595	Gatm	81660	1052.6
Usp29	361495	Impact	497198	1053.44
Ampd3	25095	Impact	497198	1065.92
Dlx5	25431	Snrpn	81781	1067.94
Dlx5	25431	Cntn3	54279	1074.65
Gpr1	25457	Begain	79146	1077.45
Gnas	24896	Nap1l4	361684	1079.88
Cd81	25621	Copg2	301742	1081.25
Igf2	24483	Wt1	24883	1121.69
Wt1	24883	Slc22a3	29504	1122.49
Th	25085	Nap1l5	688843	1122.52
Cd81	25621	Osbpl5	361686	1128.67
Dio3	29475	Peg10	678843	1147.17
Rasgrf1	192213	Hm13	311545	1148.83
Plagl1	25157	Impact	497198	1169.68
Htr2a	29595	Art5	259167	1171.34
Th	25085	Begain	79146	1174.13
Snrpn	81781	Impact	497198	1175.2
Calcr	116506	Hm13	311545	1178.41
Dlx5	25431	Calcr	116506	1189.47
Gpr1	25457	Rasgrf1	192213	1192.12
