# Supplementary material for: A systems-level approach to parental genomic imprinting: the imprinted gene network includes extracellular matrix genes and regulates cell cycle exit and differentiation
Source: HighWire-hosted journal article supplement (doi:10.1101/gr.175919.114), 2015-01-22
Supplement: Table_S9.xlsx [file Table_S9.xlsx]

## Sheet: Table S9
	3T3-L1 (endogenous)	Transfected 3T3-L1	Confluent MEFs	Ratio (transfected 3T3-L1/max(endogenous 3T3-L1;MEFs)
Cdkn1c	absent call	160.0	42.6	3.75
Dcn	4.04	399.6	65.3	6.12
Dlk1	167.40	183.3	7.8	1.10
Gatm	absent call	11.7	0.04	332.35
Gnas	68.44	109.7	61.1	1.60
Grb10	0.33	18.1	19.8	0.92
Meg3	0.02	10.4	54.7	0.19
Igf2	0.23	32.0	77.0	0.42
Ascl2	0.01	0.58	0.07	8.68
Mest	0.05	0.43	20.3	0.02
Nap1l4	2.39	169.1	5.88	28.75
Ndn	2.00	5.89	5.10	1.16
Nnat	0.87	4.05	1.34	3.03
Osbpl5	0.26	1.42	2.06	0.69
Peg3	6.72	5.98	7.22	0.83
Pon2	2.10	5.77	1.43	2.74
Sgce	0.61	2.48	1.41	1.76
Slc38a4	4.22	10.18	1.93	2.41
Ube3a	3.16	5.25	1.07	1.66
Plagl1	absent call	1.29	11.36	0.11
