# Supplementary material for: A systems-level approach to parental genomic imprinting: the imprinted gene network includes extracellular matrix genes and regulates cell cycle exit and differentiation
Source: HighWire-hosted journal article supplement (doi:10.1101/gr.175919.114), 2015-01-22
Supplement: Table_S10.xlsx [file Table_S10.xlsx]

## Sheet: Table S10
Symbol_1	Gene ID_1	Symbol_2	Gene ID_2	Mutual Rank	Cor
Acta2	11475	Tagln	21345	1	0.717
Airn	104103	Igf2r	16004	1	0.643
C1qb	12260	C1qc	12262	1	0.946
Cdh11	12552	Mmp2	17390	1	0.674
Cdkn1c	12577	Igf2	16002	1	0.627
Col1a2	12843	Col3a1	12825	1	0.837
Col6a1	12833	Col6a2	12834	1	0.82
Fbxw11	103583	Ywhag	22628	1	0.745
Fkbp10	14230	Leprel4	66180	1	0.656
Fkbp9	27055	Serpinh1	12406	1	0.623
Gdi2	14569	Rab18	19330	1	0.78
Gucy1a3	60596	Gucy1b3	54195	1	0.754
Kcnq1ot1	63830	Rev3l	19714	1	0.782
Lyz1	17110	Lyz2	17105	1	0.918
Mdk	17242	Nnat	18111	1	0.573
Meg3	17263	Rian	75745	1	0.628
Meis2	17536	Nr2f1	13865	1	0.573
Myl9	98932	Tpm2	22004	1	0.755
Parva	57342	Phldb2	208177	1	0.538
C1qa	12259	C1qc	12262	1.4	0.932
Cald1	109624	Lhfp	108927	1.4	0.616
Cald1	109624	Myl9	98932	1.4	0.682
Cnn2	12798	Vim	22352	1.4	0.565
Col4a1	12826	Sparc	20692	1.4	0.624
Ctnnb1	12387	Gdi2	14569	1.4	0.775
Dcn	13179	Lum	17022	1.4	0.7
Fkbp10	14230	Rcn3	52377	1.4	0.632
Resp18	19711	Tmem130	243339	1.4	0.558
Sparcl1	13602	Timp3	21859	1.4	0.604
Tgfb1i1	21804	Tpm2	22004	1.4	0.702
Tmsb4x	19241	Wbp5	22381	1.4	0.619
Ahcyl1	229709	Caprin1	53872	1.7	0.775
Akap9	100986	Atrx	22589	1.7	0.662
Col1a2	12843	Col5a2	12832	1.7	0.769
H19	14955	Igf2	16002	1.7	0.553
Jam3	83964	Mageh1	75625	1.7	0.446
Lasp1	16796	Rc3h2	319817	1.7	0.804
Meis1	17268	Pdgfra	18595	1.7	0.577
Pmp22	18858	Tgfb2	21808	1.7	0.498
Armcx1	78248	Armcx2	67416	2	0.562
Armcx2	67416	Fstl1	14314	2	0.619
Bgn	12111	Col1a2	12843	2	0.758
C1qa	12259	C1qb	12260	2	0.915
Capn6	12338	Dlk1	13386	2	0.474
Cdh11	12552	Rbp1	19659	2	0.592
Cdkn1c	12577	Gpc3	14734	2	0.511
Col1a1	12842	Col3a1	12825	2	0.759
Col1a2	12843	Col6a2	12834	2	0.787
Ctnnb1	12387	Rab18	19330	2	0.774
Epb4.1l2	13822	Fbxw11	103583	2	0.74
Fzd2	57265	Tead2	21677	2	0.452
Nr2f1	13865	Nr2f2	11819	2	0.496
Pon2	330260	Pon3	269823	2	0.438
Resp18	19711	Scg2	20254	2	0.541
Tmsb4x	19241	Vim	22352	2	0.552
Cd81	12520	Tmsb4x	19241	2.2	0.495
Col16a1	107581	Leprel2	14789	2.2	0.519
Col3a1	12825	Fbn1	14118	2.2	0.738
Lhfp	108927	Pmp22	18858	2.2	0.542
Myl9	98932	Mylk	107589	2.2	0.665
Acta2	11475	Myl9	98932	2.5	0.677
Actg2	11468	Tagln	21345	2.5	0.635
Aspn	66695	Ogn	18295	2.5	0.597
Ccdc80	67896	Fam114a1	68303	2.5	0.589
Col3a1	12825	Col5a2	12832	2.5	0.761
Col3a1	12825	Col6a2	12834	2.5	0.764
Col3a1	12825	Postn	50706	2.5	0.733
Col6a2	12834	Islr	26968	2.5	0.688
Lama2	16773	Mfap4	76293	2.5	0.55
Serpinh1	12406	Sparc	20692	2.5	0.61
Cadps	27062	Dner	227325	2.6	0.539
Col3a1	12825	Dcn	13179	2.6	0.705
Col5a1	12831	Fbn1	14118	2.6	0.653
Col5a2	12832	Lox	16948	2.6	0.631
Nfia	18027	Odz3	23965	2.6	0.571
Agtr2	11609	Nrk	27206	2.8	0.364
Caprin1	53872	Dnm1l	74006	2.8	0.768
Caprin1	53872	Epb4.1l2	13822	2.8	0.746
Col5a2	12832	Fbn1	14118	2.8	0.703
Dlk1	13386	Igf2	16002	2.8	0.525
Fkbp10	14230	Leprel2	14789	2.8	0.565
Fstl1	14314	Ptn	19242	2.8	0.565
Gpx8	69590	Rcn3	52377	2.8	0.55
Gucy1a3	60596	Tcf21	21412	2.8	0.578
Myl9	98932	Tgfb1i1	21804	2.8	0.668
Pdgfra	18595	Serpinh1	12406	2.8	0.586
2310035C23Rik	227446	Rev3l	19714	3	0.737
6330403K07Rik	103712	Tro	56191	3	0.481
Acta2	11475	Tpm2	22004	3	0.651
Adamts2	216725	Fbn1	14118	3	0.64
Apoe	11816	C1qa	12259	3	0.562
Aspn	66695	Dpt	56429	3	0.589
Ctnnb1	12387	Epb4.1l2	13822	3	0.739
Fbn2	14119	Odz3	23965	3	0.53
Mmp2	17390	Thbs2	21826	3	0.563
Nr2f2	11819	Rbms3	207181	3	0.468
6330403K07Rik	103712	Clip3	76686	3.2	0.475
6330403K07Rik	103712	Nnat	18111	3.2	0.514
Col1a1	12842	Col1a2	12843	3.2	0.755
Col3a1	12825	Loxl1	16949	3.2	0.669
Col6a2	12834	Ogn	18295	3.2	0.631
D0H4S114	27528	Plagl1	22634	3.2	0.461
Dcn	13179	Dpt	56429	3.2	0.609
Dpt	56429	Eln	13717	3.2	0.551
Gpc6	23888	Gpx8	69590	3.2	0.52
Lox	16948	Thbs2	21826	3.2	0.557
Ptbp2	56195	Sbno1	243272	3.2	0.609
Sparcl1	13602	Tspan7	21912	3.2	0.578
Aebp1	11568	Serpinf1	20317	3.3	0.47
Bgn	12111	Mgp	17313	3.3	0.587
Ccdc80	67896	Col1a2	12843	3.3	0.63
Cdh11	12552	Gpc6	23888	3.3	0.532
Cmtm3	68119	Rcn3	52377	3.3	0.525
Col3a1	12825	Nid1	18073	3.3	0.663
Fkbp10	14230	Gpx8	69590	3.3	0.552
Gpc3	14734	Meg3	17263	3.3	0.52
Mmp2	17390	Nid2	18074	3.3	0.548
Ahcyl1	229709	Rab18	19330	3.5	0.737
Armcx2	67416	Bex1	19716	3.5	0.546
Atrx	22589	Malat1	72289	3.5	0.645
Cadps	27062	Syt1	20979	3.5	0.573
Col1a1	12842	Col5a2	12832	3.5	0.704
Col1a1	12842	Col6a2	12834	3.5	0.714
Col1a1	12842	Loxl1	16949	3.5	0.665
Dnm1l	74006	Epb4.1l2	13822	3.5	0.734
Dock1	330662	Twsg1	65960	3.5	0.696
Gpc3	14734	Mdk	17242	3.5	0.496
Igfbp2	16008	Stmn2	20257	3.5	0.511
Meis1	17268	Meis2	17536	3.5	0.51
Meis1	17268	Nr2f1	13865	3.5	0.505
Nid2	18074	Rbp1	19659	3.5	0.519
Pcolce	18542	Rab34	19376	3.5	0.544
Fkbp10	14230	Pcolce	18542	3.6	0.549
Fstl1	14314	Ppic	19038	3.6	0.524
Gpx7	67305	Rcn3	52377	3.6	0.509
Mpdz	17475	Pja2	224938	3.6	0.562
Pdgfra	18595	Tfpi	21788	3.6	0.511
Aebp1	11568	Vasn	246154	3.7	0.463
Antxr1	69538	Fbn1	14118	3.7	0.603
Aplp1	11803	Stmn2	20257	3.7	0.509
Aplp2	11804	Ctnnb1	12387	3.7	0.698
Cdh11	12552	Islr	26968	3.7	0.603
Col1a1	12842	Col5a1	12831	3.7	0.651
Col1a2	12843	Col6a1	12833	3.7	0.672
Maged2	80884	Tgfb1i1	21804	3.7	0.515
Bhlhb9	70237	Plagl1	22634	3.9	0.436
Cnn2	12798	Tmsb4x	19241	3.9	0.501
Col1a1	12842	Fbn1	14118	3.9	0.701
Col4a1	12826	Serpinh1	12406	3.9	0.58
Col6a1	12833	Islr	26968	3.9	0.629
Dach1	13134	Rev3l	19714	3.9	0.675
Bhlhb9	70237	Itm2a	16431	4	0.435
Cdh5	12562	Ramp2	54409	4	0.603
Col1a2	12843	Postn	50706	4	0.635
Col3a1	12825	Lum	17022	4	0.679
Fbn1	14118	Fstl1	14314	4	0.641
Fstl1	14314	Ndn	17984	4	0.654
Islr	26968	Ogn	18295	4	0.599
Islr	26968	Scara3	219151	4	0.55
Mmp2	17390	Rbp1	19659	4	0.568
Col6a2	12834	Dpt	56429	4.1	0.609
Lama4	16775	Rev3l	19714	4.1	0.669
Mmp2	17390	Tgfbi	21810	4.1	0.506
Bgn	12111	Col3a1	12825	4.2	0.675
Cdh5	12562	Sox18	20672	4.2	0.632
Col1a2	12843	Mmp2	17390	4.2	0.633
Col6a2	12834	Eln	13717	4.2	0.596
Fbn1	14118	Loxl1	16949	4.2	0.655
Gnai1	14677	Klhl13	67455	4.2	0.557
Islr	26968	Mmp2	17390	4.2	0.618
Mdk	17242	Sfrp1	20377	4.2	0.454
Rbms1	56878	Runx1t1	12395	4.2	0.464
Aebp1	11568	Col1a1	12842	4.4	0.567
Cdh11	12552	Efemp1	216616	4.4	0.508
Fstl1	14314	Mest	17294	4.4	0.494
Armcx1	78248	Gprasp1	67298	4.5	0.463
Cadps	27062	Cntn1	12805	4.5	0.479
Cald1	109624	Tgfb1i1	21804	4.5	0.593
Efemp1	216616	Ptgis	19223	4.5	0.456
Efemp1	216616	Smoc2	64074	4.5	0.461
Gas1	14451	Ptn	19242	4.5	0.499
Lum	17022	Postn	50706	4.5	0.623
Pcolce	18542	Vim	22352	4.5	0.535
Bex1	19716	Klhl13	67455	4.6	0.527
Cacna2d1	12293	Lama4	16775	4.6	0.554
Fbn1	14118	Mfap4	76293	4.6	0.583
Meg3	17263	Tmem130	243339	4.6	0.547
Nr2f2	11819	Phldb2	208177	4.6	0.458
Apoe	11816	C1qb	12260	4.7	0.547
Col1a1	12842	Loxl2	94352	4.7	0.555
Col1a1	12842	Rcn3	52377	4.7	0.602
Col6a2	12834	Mxra8	74761	4.7	0.558
Gpm6b	14758	Tspan7	21912	4.7	0.488
Mmp2	17390	Ptgis	19223	4.7	0.497
Maged1	94275	Sparc	20692	4.8	0.479
6330403K07Rik	103712	Fbn2	14119	4.9	0.504
Acta2	11475	Fam114a1	68303	4.9	0.544
Add1	11518	Csrp1	13007	4.9	0.575
Ascl2	17173	Sct	20287	4.9	0.429
Bex1	19716	Bex2	12069	4.9	0.504
Bgn	12111	Col5a2	12832	4.9	0.635
Bgn	12111	Col6a2	12834	4.9	0.669
Cdh11	12552	Nid2	18074	4.9	0.531
Col1a2	12843	Fbn1	14118	4.9	0.679
Col5a2	12832	Postn	50706	4.9	0.628
Csrp1	13007	Klc1	16593	4.9	0.6
Gulp1	70676	Ogn	18295	4.9	0.477
Leprel2	14789	Leprel4	66180	4.9	0.509
Pdgfra	18595	Runx1t1	12395	4.9	0.482
Ppic	19038	Rcn3	52377	4.9	0.51
S1pr3	13610	Tgfbr3	21814	4.9	0.425
Bex2	12069	Gpc3	14734	5	0.464
Caprin1	53872	Son	20658	5	0.717
Cdh5	12562	Igfbp3	16009	5	0.548
Col5a2	12832	Col6a2	12834	5	0.698
Mmp2	17390	Tgfb3	21809	5	0.493
Armcx2	67416	Tspan6	56496	5.1	0.511
Bgn	12111	Timp3	21859	5.1	0.581
Col3a1	12825	Islr	26968	5.1	0.653
Meis1	17268	Nr2f2	11819	5.1	0.485
Nr2f1	13865	Peg12	27412	5.1	0.432
Col1a1	12842	Fstl1	14314	5.2	0.635
Fbln2	14115	Lox	16948	5.2	0.532
Armcx2	67416	Bhlhb9	70237	5.3	0.464
Ccdc80	67896	Loxl1	16949	5.3	0.593
Cnn2	12798	Pcolce	18542	5.3	0.52
Dcn	13179	Ogn	18295	5.3	0.591
Esam	69524	Gng11	66066	5.3	0.659
Gpc6	23888	Ptn	19242	5.3	0.493
Mmp2	17390	Scara3	219151	5.3	0.52
Tagln	21345	Tpm2	22004	5.3	0.609
Cav1	12389	Col3a1	12825	5.4	0.573
Cd36	12491	Lyz2	17105	5.4	0.518
Fbln2	14115	Fbn1	14118	5.4	0.558
Antxr1	69538	Col1a1	12842	5.5	0.572
Art1	11870	Tpm1	22003	5.5	0.724
Bgn	12111	Col6a1	12833	5.5	0.623
Caprin1	53872	Ywhag	22628	5.5	0.727
Ccnd2	12444	Mmp14	17387	5.5	0.435
Cdh11	12552	Meis2	17536	5.5	0.513
Cdh11	12552	Postn	50706	5.5	0.583
Col1a1	12842	Fkbp10	14230	5.5	0.619
Col1a2	12843	Nid1	18073	5.5	0.621
Esam	69524	Gucy1b3	54195	5.5	0.598
Fbn1	14118	Lum	17022	5.5	0.632
Lama2	16773	Pdlim3	53318	5.5	0.538
Maged2	80884	Rcn3	52377	5.5	0.507
Pdlim7	67399	Tgfb1i1	21804	5.5	0.514
Col1a1	12842	Dlk1	13386	5.6	0.528
Htra1	56213	Pxdn	69675	5.6	0.402
2310035C23Rik	227446	Dock1	330662	5.7	0.705
Acta2	11475	Actg2	11468	5.7	0.587
Col1a1	12842	Col6a1	12833	5.7	0.645
Col1a2	12843	Fmod	14264	5.7	0.533
Ctnnb1	12387	Son	20658	5.7	0.695
Fkbp9	27055	Sparc	20692	5.7	0.514
Loxl1	16949	Rcn3	52377	5.7	0.554
Parva	57342	Pxdn	69675	5.7	0.442
Pja2	224938	Spnb2	20742	5.7	0.569
Rbfox2	93686	Rhobtb3	73296	5.7	0.536
Tagln	21345	Tnc	21923	5.7	0.536
Ccdc80	67896	Col3a1	12825	5.8	0.629
Acta2	11475	Tgfb1i1	21804	5.9	0.592
Ahcyl1	229709	Fbxw11	103583	5.9	0.722
Armcx2	67416	Klhl13	67455	5.9	0.543
Cideb	12684	Slc22a18	18400	5.9	0.696
Cideb	12684	Ugt2b34	100727	5.9	0.775
Col6a2	12834	Fbn1	14118	5.9	0.669
Gprasp2	245607	Tspan6	56496	5.9	0.454
Gprasp2	245607	Zdbf2	319584	5.9	0.371
Itm2a	16431	Plagl1	22634	5.9	0.434
Mgp	17313	Rbp1	19659	5.9	0.51
Sparcl1	13602	Tcf21	21412	5.9	0.572
Aebp1	11568	Rcn3	52377	6	0.529
Arhgef25	52666	Fkbp10	14230	6	0.551
Cald1	109624	Tpm2	22004	6	0.599
Ccdc80	67896	Col5a2	12832	6	0.606
Col3a1	12825	Col6a1	12833	6	0.655
Gap43	14432	Syt11	229521	6	0.424
Lox	16948	Wisp1	22402	6	0.523
Lum	17022	Sparcl1	13602	6	0.591
Mgp	17313	Nbl1	17965	6	0.464
Arhgef25	52666	Leprel2	14789	6.2	0.528
Col1a1	12842	Nid1	18073	6.2	0.591
Col1a2	12843	Dcn	13179	6.2	0.627
Fbn1	14118	Mmp14	17387	6.2	0.531
Gucy1b3	54195	Tspan7	21912	6.2	0.549
Bex1	19716	Cdkn1c	12577	6.3	0.475
Bgn	12111	Sparc	20692	6.3	0.593
Cd34	12490	Cdh5	12562	6.3	0.556
Col5a1	12831	Mrc2	17534	6.3	0.568
Col6a2	12834	Copz2	56358	6.3	0.512
Dpt	56429	Sparcl1	13602	6.3	0.567
Gnai1	14677	Id4	15904	6.3	0.496
Igfbp2	16008	Ltbp4	108075	6.3	0.467
Il6st	16195	Rab18	19330	6.3	0.658
Lhfp	108927	Myl9	98932	6.3	0.557
Mmp14	17387	Sparc	20692	6.3	0.517
Mmp2	17390	Serpine2	20720	6.4	0.453
2310035C23Rik	227446	Sel1l	20338	6.5	0.713
Antxr1	69538	Nid1	18073	6.5	0.547
Armcx1	78248	Impact	16210	6.5	0.463
Bgn	12111	Dcn	13179	6.5	0.597
Ccdc80	67896	Gas1	14451	6.5	0.522
Cdkn1c	12577	Mdk	17242	6.5	0.461
Col14a1	12818	Sparcl1	13602	6.5	0.53
Col3a1	12825	Gas1	14451	6.5	0.538
Efemp1	216616	Mmp2	17390	6.5	0.499
Epb4.1l2	13822	Ywhag	22628	6.5	0.698
Fstl1	14314	Mmp14	17387	6.5	0.52
Igf2	16002	Nnat	18111	6.5	0.48
Jam3	83964	Mdk	17242	6.5	0.433
Sfrp1	20377	Tcf21	21412	6.5	0.456
Antxr1	69538	Fstl1	14314	6.6	0.554
Cd47	16423	Kcnq1ot1	63830	6.6	0.617
Col6a2	12834	Lum	17022	6.6	0.627
Apoe	11816	C1qc	12262	6.7	0.533
Caprin1	53872	Rab18	19330	6.7	0.744
Cdh5	12562	Thbd	21824	6.7	0.489
Col3a1	12825	Wisp1	22402	6.7	0.536
Col5a1	12831	Col5a2	12832	6.7	0.611
Ctsh	13036	Ctsz	64138	6.7	0.514
Nid1	18073	Ppap2b	67916	6.7	0.437
Aebp1	11568	Loxl1	16949	6.9	0.531
Apoe	11816	Ctsh	13036	6.9	0.505
Cdkn1c	12577	H19	14955	6.9	0.453
Col14a1	12818	Eln	13717	6.9	0.491
Col1a2	12843	Loxl1	16949	6.9	0.63
Col6a2	12834	Dcn	13179	6.9	0.626
Esam	69524	Gucy1a3	60596	6.9	0.547
Fbln2	14115	Wisp1	22402	6.9	0.473
Fbn1	14118	Tnc	21923	6.9	0.572
Fbxw11	103583	Sel1l	20338	6.9	0.721
Fkbp10	14230	Loxl1	16949	6.9	0.572
Hdgfrp3	29877	Tspan6	56496	6.9	0.436
Leprel2	14789	Mrc2	17534	6.9	0.526
Magel2	27385	Zdbf2	319584	6.9	0.359
Scg2	20254	Tmem130	243339	6.9	0.494
Fkbp10	14230	Fstl1	14314	7	0.569
Gucy1b3	54195	Mylk	107589	7	0.584
Rbp1	19659	Tgfbi	21810	7	0.478
Acta2	11475	Col1a2	12843	7.1	0.631
Adamts2	216725	Col6a2	12834	7.1	0.547
Asb4	65255	Capn6	12338	7.1	0.357
Atrx	22589	Nedd4	17999	7.1	0.615
Emcn	59308	Tek	21687	7.1	0.638
Fbn1	14118	Pxdn	69675	7.1	0.499
Fbn2	14119	Ptn	19242	7.1	0.471
Fkbp9	27055	Gpx8	69590	7.1	0.497
Grb10	14783	Ywhag	22628	7.1	0.612
Peg3	18616	Scd2	20250	7.1	0.564
Caprin1	53872	Ctnnb1	12387	7.2	0.734
Dock1	330662	Rbfox2	93686	7.2	0.589
Klc1	16593	Ywhag	22628	7.2	0.668
Aebp1	11568	Pcolce	18542	7.3	0.517
Bgn	12111	Mxra8	74761	7.3	0.549
Cdkn1c	12577	Nnat	18111	7.3	0.446
Col1a1	12842	Lox	16948	7.3	0.569
Col3a1	12825	Lox	16948	7.3	0.579
Dock1	330662	Lamc1	226519	7.3	0.652
Lox	16948	Serpinf1	20317	7.3	0.457
Rnase4	58809	Serping1	12258	7.3	0.52
Gpx8	69590	Leprel4	66180	7.4	0.493
Maged2	80884	Mest	17294	7.4	0.454
Armcx2	67416	Mest	17294	7.5	0.488
Capn6	12338	Fbn2	14119	7.5	0.418
Col1a1	12842	Fbln2	14115	7.5	0.54
Col1a2	12843	Islr	26968	7.5	0.626
Col3a1	12825	Col5a1	12831	7.5	0.613
Col5a1	12831	Col6a2	12834	7.5	0.612
Fkbp10	14230	Loxl2	94352	7.5	0.519
Gpc3	14734	Nnat	18111	7.5	0.441
Islr	26968	Mgp	17313	7.5	0.546
Meg3	17263	Snhg11	319317	7.5	0.443
Tgfb2	21808	Tgfb3	21809	7.5	0.446
Cdh11	12552	Tgfbi	21810	7.6	0.491
D0H4S114	27528	Sparcl1	13602	7.6	0.511
Rev3l	19714	Rhobtb3	73296	7.7	0.564
6330403K07Rik	103712	Odz3	23965	7.8	0.515
Acta2	11475	Col3a1	12825	7.8	0.638
Cav1	12389	Nid1	18073	7.8	0.512
Col5a2	12832	Wisp1	22402	7.8	0.528
Dcn	13179	Serping1	12258	7.8	0.536
Fbxw11	103583	Klc1	16593	7.8	0.67
Islr	26968	Rbp1	19659	7.8	0.533
Mrc2	17534	Mxra8	74761	7.8	0.531
Cdh11	12552	Ptn	19242	7.9	0.506
Igf2	16002	Nrk	27206	7.9	0.402
Mmp2	17390	Smoc2	64074	7.9	0.476
Aebp1	11568	Col6a2	12834	8	0.537
Axl	26362	Sparc	20692	8	0.453
Dnm1l	74006	Utrn	22288	8	0.642
Fbn2	14119	Mdk	17242	8	0.458
Arhgef25	52666	Rcn3	52377	8.1	0.535
Bgn	12111	Copz2	56358	8.1	0.503
Col1a1	12842	Mmp14	17387	8.1	0.526
Col3a1	12825	Mxra8	74761	8.1	0.556
Col5a2	12832	Loxl1	16949	8.1	0.607
Col6a2	12834	Postn	50706	8.1	0.613
Fzd2	57265	Leprel4	66180	8.1	0.441
Maged1	94275	Serpinh1	12406	8.1	0.46
Matn2	17181	Thbs2	21826	8.1	0.517
Col6a2	12834	Nbl1	17965	8.2	0.474
Fbn1	14118	Nid1	18073	8.2	0.591
Cav1	12389	Col1a2	12843	8.3	0.557
Ebf3	13593	Prrx1	18933	8.3	0.457
Actg2	11468	Tpm2	22004	8.4	0.575
Aspn	66695	Thbs2	21826	8.4	0.509
Cd47	16423	Rev3l	19714	8.4	0.61
Cdkn1c	12577	Klhl13	67455	8.4	0.468
Col3a1	12825	Mgp	17313	8.4	0.552
Eln	13717	Mfap4	76293	8.4	0.496
Gpc6	23888	Phldb2	208177	8.4	0.438
Lrp1	16971	Tgfbi	21810	8.4	0.454
Mmp23	26561	Pcolce	18542	8.4	0.436
Peg12	27412	Sox11	20666	8.4	0.41
Akap9	100986	Malat1	72289	8.5	0.595
Bgn	12111	Col1a1	12842	8.5	0.601
C1qa	12259	Lyz2	17105	8.5	0.571
Cav1	12389	Dcn	13179	8.5	0.522
Cntn3	18488	Lox	16948	8.5	0.446
Dpt	56429	Ogn	18295	8.5	0.537
Epb4.1l2	13822	Gdi2	14569	8.5	0.7
Fbln2	14115	Fkbp10	14230	8.5	0.526
Lama4	16775	Lamc1	226519	8.5	0.595
Mgp	17313	Timp3	21859	8.5	0.497
Ptgis	19223	Thbs2	21826	8.5	0.459
Ctnnb1	12387	Gja1	14609	8.6	0.661
Col14a1	12818	Lum	17022	8.7	0.521
Col1a2	12843	Sparc	20692	8.7	0.593
Fbn1	14118	Fkbp10	14230	8.7	0.586
Fbn1	14118	Tagln	21345	8.7	0.603
Fmod	14264	Ogn	18295	8.7	0.477
Impact	16210	Wbp5	22381	8.7	0.475
Leprel4	66180	Rcn3	52377	8.7	0.494
Apoe	11816	Igfbp2	16008	8.8	0.447
Dmd	13405	Syt1	20979	8.8	0.457
Add1	11518	Ctnnb1	12387	8.9	0.62
Antxr1	69538	Ptn	19242	8.9	0.498
Cald1	109624	Pmp22	18858	8.9	0.507
Cdh11	12552	Gas1	14451	8.9	0.508
Col1a1	12842	H19	14955	8.9	0.514
Col3a1	12825	Loxl2	94352	8.9	0.538
Col5a2	12832	Col6a1	12833	8.9	0.609
Col5a2	12832	Nid1	18073	8.9	0.577
Col6a2	12834	Loxl1	16949	8.9	0.611
Islr	26968	Postn	50706	8.9	0.576
Pja2	224938	Rab18	19330	8.9	0.619
Ptgis	19223	Serpine2	20720	8.9	0.403
Tagln	21345	Tgfb1i1	21804	8.9	0.54
Dcn	13179	Sparcl1	13602	9	0.569
Emcn	59308	Igfbp3	16009	9	0.488
Gas1	14451	Sfrp2	20319	9	0.44
Elavl2	15569	Lasp1	16796	9.1	0.724
6330403K07Rik	103712	Bex2	12069	9.2	0.45
6330403K07Rik	103712	Gprasp2	245607	9.2	0.446
Actg2	11468	Tgfb1i1	21804	9.2	0.528
Aspn	66695	Col6a2	12834	9.2	0.582
Col5a1	12831	Tnc	21923	9.2	0.509
Col6a1	12833	Fbn1	14118	9.2	0.616
Gpc3	14734	Igf2	16002	9.2	0.473
Ltbp4	108075	Stmn2	20257	9.2	0.479
Lum	17022	Ogn	18295	9.2	0.541
Myl9	98932	Tagln	21345	9.2	0.593
Rbms1	56878	Rbms3	207181	9.2	0.447
Rcn3	52377	Selm	114679	9.2	0.432
Serpinf1	20317	Thbs2	21826	9.2	0.45
Cd81	12520	Wbp5	22381	9.3	0.434
Gng11	66066	Gucy1b3	54195	9.3	0.626
Cdh11	12552	Hdgfrp3	29877	9.4	0.462
Dcn	13179	Islr	26968	9.4	0.574
Nid2	18074	Rcn3	52377	9.4	0.49
Pdlim3	53318	Tpm2	22004	9.4	0.556
Acta2	11475	Col6a2	12834	9.5	0.612
Aplp2	11804	Gdi2	14569	9.5	0.663
Cdh11	12552	Scara3	219151	9.5	0.489
Cmtm3	68119	Lrp1	16971	9.5	0.452
Col16a1	107581	Col6a2	12834	9.5	0.504
Col5a1	12831	Fkbp10	14230	9.5	0.561
Col5a2	12832	Lum	17022	9.5	0.6
Col6a1	12833	Loxl1	16949	9.5	0.562
Col6a1	12833	Ogn	18295	9.5	0.539
Col6a1	12833	Pcolce	18542	9.5	0.529
Emcn	59308	Sox18	20672	9.5	0.575
Igfbp2	16008	Ptprf	19268	9.5	0.484
Mdk	17242	Tspan6	56496	9.5	0.452
Mgp	17313	Serping1	12258	9.5	0.494
Nap1l5	58243	Scg2	20254	9.5	0.451
Sdc2	15529	Slc38a4	69354	9.5	0.388
Adamts2	216725	Loxl1	16949	9.6	0.511
Antxr1	69538	Col3a1	12825	9.6	0.569
Capn6	12338	Pdgfra	18595	9.6	0.437
Cd36	12491	Lyz1	17110	9.6	0.503
Rab18	19330	Son	20658	9.6	0.671
Arhgef25	52666	Efemp2	58859	9.7	0.566
Gpm6b	14758	Sparcl1	13602	9.7	0.481
Adamts2	216725	Mmp23	26561	9.8	0.427
Axl	26362	Cmtm3	68119	9.8	0.422
Bgn	12111	Nid1	18073	9.8	0.551
Cdh11	12552	Tgfb2	21808	9.8	0.458
Cdh5	12562	Emcn	59308	9.8	0.587
Col1a2	12843	Lum	17022	9.8	0.614
Fstl1	14314	Pxdn	69675	9.8	0.468
Gap43	14432	Nnat	18111	9.8	0.418
Gucy1b3	54195	Myl9	98932	9.8	0.584
Hpn	15451	Slc22a18	18400	9.8	0.652
Ramp2	54409	Sox18	20672	9.8	0.557
6330403K07Rik	103712	Zfp521	225207	9.9	0.471
Acta2	11475	Ccdc80	67896	9.9	0.551
Aebp1	11568	Mxra8	74761	9.9	0.509
Axl	26362	S1pr3	13610	9.9	0.406
Bex1	19716	Wbp5	22381	9.9	0.494
Cd82	12521	Zap70	22637	9.9	0.622
Col1a1	12842	Postn	50706	9.9	0.58
Magel2	27385	Th	21823	9.9	0.404
Mxra8	74761	Nbl1	17965	9.9	0.443
Nt5dc2	70021	Rab34	19376	9.9	0.479
Ahcyl1	229709	Ak3	56248	10	0.632
Aspn	66695	Eln	13717	10	0.482
Ccdc80	67896	Col6a2	12834	10	0.593
Cmtm3	68119	Tgfbi	21810	10	0.467
D0H4S114	27528	Tspan7	21912	10	0.482
Dcn	13179	Postn	50706	10	0.569
Emcn	59308	Esam	69524	10	0.574
Gulp1	70676	Prrx1	18933	10	0.462
Mageh1	75625	Nbea	26422	10	0.41
Mest	17294	Pxdn	69675	10	0.433
Dach1	13134	Kcnq1ot1	63830	10.1	0.629
Leprel4	66180	Pcolce	18542	10.1	0.483
Armcx1	78248	Mest	17294	10.2	0.44
Col1a2	12843	Fkbp10	14230	10.2	0.576
Col3a1	12825	Mrc2	17534	10.2	0.58
Dpp6	13483	Tmem130	243339	10.2	0.479
Fbn1	14118	Lox	16948	10.2	0.568
Fkbp10	14230	Gjc1	14615	10.2	0.482
Fkbp10	14230	Mrc2	17534	10.2	0.546
Gng11	66066	Myl9	98932	10.2	0.658
Maged2	80884	Tro	56191	10.2	0.407
Mdk	17242	Mest	17294	10.2	0.439
Slit2	20563	Tek	21687	10.2	0.675
Adamts2	216725	Col1a1	12842	10.4	0.52
Bgn	12111	Islr	26968	10.4	0.582
C1qa	12259	Lyz1	17110	10.4	0.545
Calcr	12311	Magel2	27385	10.4	0.369
Ccdc80	67896	Prrx1	18933	10.4	0.499
Col1a2	12843	Col5a1	12831	10.4	0.603
Emcn	59308	Gucy1a3	60596	10.4	0.517
Igf2	16002	Rev3l	19714	10.4	0.569
Actg2	11468	Pdlim3	53318	10.5	0.506
Col1a2	12843	Ogn	18295	10.5	0.574
Col3a1	12825	Mmp2	17390	10.5	0.601
Col5a1	12831	Col6a1	12833	10.5	0.55
H19	14955	Plagl1	22634	10.5	0.417
Maged1	94275	Rab34	19376	10.5	0.441
Qpct	70536	Scg2	20254	10.5	0.351
Rab18	19330	Sel1l	20338	10.5	0.702
Cav1	12389	Sparc	20692	10.6	0.496
Dnm1	13429	Tspan7	21912	10.6	0.512
Ptgis	19223	Rbp1	19659	10.6	0.414
Adamts2	216725	Col6a1	12833	10.7	0.51
Armcx2	67416	Itm2a	16431	10.7	0.438
Col6a2	12834	Mmp2	17390	10.7	0.594
Fkbp9	27055	Phldb2	208177	10.7	0.436
Ak3	56248	Twsg1	65960	10.8	0.621
Clip3	76686	Leprel2	14789	10.8	0.446
Col14a1	12818	Lama4	16775	10.8	0.521
Col1a2	12843	Mxra8	74761	10.8	0.544
Col6a2	12834	Lama2	16773	10.8	0.54
Ctnnb1	12387	Scd2	20250	10.8	0.639
Fkbp10	14230	Gpx7	67305	10.8	0.45
Gulp1	70676	Rbfox2	93686	10.8	0.474
Lama4	16775	Sel1l	20338	10.8	0.619
Ptgis	19223	Serpinf1	20317	10.8	0.404
Aspn	66695	Postn	50706	10.9	0.518
Bgn	12111	Serping1	12258	10.9	0.529
Caprin1	53872	Gdi2	14569	10.9	0.726
Col1a1	12842	Mmp2	17390	10.9	0.57
Col1a2	12843	Fstl1	14314	10.9	0.585
Col3a1	12825	Fstl1	14314	10.9	0.592
Copz2	56358	Mxra8	74761	10.9	0.474
Dab2	13132	Timp3	21859	10.9	0.485
Dcn	13179	Mgp	17313	10.9	0.514
Dlk1	13386	Leprel4	66180	10.9	0.454
Lum	17022	Mfap4	76293	10.9	0.517
Mmp2	17390	Postn	50706	10.9	0.55
Nt5dc2	70021	Wbp5	22381	10.9	0.479
Pxdn	69675	Rab34	19376	10.9	0.443
Sdc2	15529	Serpinf1	20317	10.9	0.419
Gprasp1	67298	Gprasp2	245607	11	0.417
Col5a2	12832	Tnc	21923	11.1	0.527
Fbxw11	103583	Il6st	16195	11.1	0.629
Acta2	11475	Col5a2	12832	11.2	0.579
Antxr1	69538	Cdh11	12552	11.2	0.521
Col1a1	12842	Ppic	19038	11.2	0.51
Fbn1	14118	Fbn2	14119	11.2	0.518
Islr	26968	Smoc2	64074	11.2	0.476
Mylk	107589	Tgfb1i1	21804	11.2	0.531
Pdlim3	53318	Sparcl1	13602	11.2	0.535
Postn	50706	Tgfbi	21810	11.3	0.482
Antxr1	69538	Col1a2	12843	11.4	0.554
Ctsh	13036	Rnase4	58809	11.4	0.504
Islr	26968	Lum	17022	11.4	0.564
Mxra8	74761	Pcolce	18542	11.4	0.512
Adamts2	216725	Col5a1	12831	11.5	0.504
Anxa5	11747	Pea15a	18611	11.5	0.407
Bex2	12069	Mest	17294	11.5	0.428
Caprin1	53872	Fbxw11	103583	11.5	0.724
Col16a1	107581	Thbs2	21826	11.5	0.471
Col6a1	12833	Lum	17022	11.5	0.55
Col6a2	12834	Mfap4	76293	11.5	0.536
Ctsz	64138	Pon3	269823	11.5	0.428
Efemp1	216616	Islr	26968	11.5	0.474
Esam	69524	Mylk	107589	11.5	0.558
Fkbp10	14230	Fzd2	57265	11.5	0.465
Fstl1	14314	Tspan6	56496	11.5	0.465
Igf2	16002	Rhobtb3	73296	11.5	0.486
Clip3	76686	Syt11	229521	11.6	0.407
Epb4.1l2	13822	Gja1	14609	11.6	0.645
Epb4.1l2	13822	Utrn	22288	11.6	0.625
Gpc6	23888	Tgfb2	21808	11.6	0.437
Impact	16210	Tcf12	21406	11.6	0.487
Col1a2	12843	Mgp	17313	11.7	0.532
Copz2	56358	Fam114a1	68303	11.7	0.465
Dnm1l	74006	Fbxw11	103583	11.7	0.695
Gdi2	14569	Son	20658	11.7	0.67
Ccdc80	67896	Fbn1	14118	11.8	0.584
Col3a1	12825	Eln	13717	11.8	0.535
Fbln2	14115	Loxl1	16949	11.8	0.502
Fkbp9	27055	Jam3	83964	11.8	0.419
Lhfp	108927	Mylk	107589	11.8	0.512
Lrp1	16971	Rnase4	58809	11.8	0.457
Meis1	17268	Runx1t1	12395	11.8	0.46
Reck	53614	Ttc28	209683	11.8	0.419
Ramp2	54409	Tek	21687	11.9	0.584
6330403K07Rik	103712	Mdk	17242	12	0.446
Aplp1	11803	Ltbp4	108075	12	0.454
Bgn	12111	Fbn1	14118	12	0.592
C1qb	12260	Lyz1	17110	12	0.537
Cav1	12389	Cd34	12490	12	0.462
Cmtm3	68119	Vim	22352	12	0.47
Col1a2	12843	Copz2	56358	12	0.502
Dach1	13134	Lama4	16775	12	0.578
Dock1	330662	Sel1l	20338	12	0.672
Fbln1	14114	Mmp2	17390	12	0.508
Hdgfrp3	29877	Mmp2	17390	12	0.438
Lama2	16773	Ogn	18295	12	0.517
Map4k3	225028	Nfia	18027	12	0.485
Antxr1	69538	Gas1	14451	12.1	0.492
Aplp2	11804	Rab18	19330	12.1	0.65
Islr	26968	Matn2	17181	12.1	0.532
Rbms1	56878	Wbp5	22381	12.1	0.466
Ahcyl1	229709	Ywhag	22628	12.2	0.677
Ccdc80	67896	Lum	17022	12.2	0.536
Col1a1	12842	Eln	13717	12.2	0.52
Col1a2	12843	Lox	16948	12.2	0.554
Col1a2	12843	Rcn3	52377	12.2	0.535
Col3a1	12825	Gpx8	69590	12.2	0.532
Col6a1	12833	Lox	16948	12.2	0.532
Leprel4	66180	Rab34	19376	12.2	0.463
Pdlim3	53318	Tagln	21345	12.2	0.517
Ptn	19242	Sfrp2	20319	12.2	0.427
Sparc	20692	Timp3	21859	12.2	0.496
Armcx2	67416	Ndn	17984	12.3	0.591
Fbn1	14118	Itm2a	16431	12.3	0.468
Gjc1	14615	Rhobtb3	73296	12.3	0.471
Lama2	16773	Sparcl1	13602	12.3	0.533
Nid1	18073	Thbd	21824	12.3	0.448
Col5a2	12832	Fkbp10	14230	12.4	0.565
Col5a2	12832	Sparc	20692	12.4	0.552
Csrp1	13007	Tgfb1i1	21804	12.4	0.528
Fstl1	14314	Nid2	18074	12.4	0.469
Gap43	14432	Stmn2	20257	12.4	0.433
Gjc1	14615	Pxdn	69675	12.4	0.443
Igfbp3	16009	Serping1	12258	12.4	0.459
Leprel2	14789	Loxl1	16949	12.4	0.511
Leprel2	14789	Rcn3	52377	12.4	0.505
Pgcp	54381	Sdc2	15529	12.4	0.456
Serpine2	20720	Smoc2	64074	12.4	0.398
Adamts2	216725	Eln	13717	12.5	0.476
Aplp1	11803	Dnm1	13429	12.5	0.48
Cd34	12490	Gnb4	14696	12.5	0.379
Col1a2	12843	Timp3	21859	12.5	0.52
Col3a1	12825	Fam114a1	68303	12.5	0.531
Fzd2	57265	Rab34	19376	12.5	0.439
Maged2	80884	Tpm2	22004	12.5	0.499
Elavl2	15569	Nrxn3	18191	12.6	0.631
Actg2	11468	Myl9	98932	12.7	0.544
Add1	11518	Klc1	16593	12.7	0.583
Ahcyl1	229709	Klc1	16593	12.7	0.657
Bgn	12111	Lox	16948	12.7	0.545
Ccdc80	67896	Col1a1	12842	12.7	0.559
Cdh11	12552	Thbs2	21826	12.7	0.51
Dock1	330662	Rev3l	19714	12.7	0.668
Fbn1	14118	Mrc2	17534	12.7	0.565
Gng11	66066	Mylk	107589	12.7	0.599
Gpx7	67305	Nid2	18074	12.7	0.413
Loxl1	16949	Loxl2	94352	12.7	0.502
Loxl1	16949	Mxra8	74761	12.7	0.526
Loxl2	94352	Mxra8	74761	12.7	0.485
Odz3	23965	Sfrp2	20319	12.7	0.454
Rab18	19330	Twsg1	65960	12.7	0.674
Thbs2	21826	Wisp1	22402	12.7	0.469
Ak3	56248	Sel1l	20338	12.8	0.621
Col3a1	12825	Matn2	17181	12.8	0.538
Col5a1	12831	Loxl1	16949	12.8	0.532
Hap1	15114	Magel2	27385	12.8	0.364
Sdc2	15529	Timp3	21859	12.8	0.439
Acsm2	233799	Slc22a2	20518	13	0.781
Ccdc80	67896	Postn	50706	13	0.527
Cdh11	12552	Col3a1	12825	13	0.575
Cntn3	18488	Hdgfrp3	29877	13	0.387
Col3a1	12825	Pdgfra	18595	13	0.553
Col6a2	12834	Mgp	17313	13	0.526
D0H4S114	27528	Fstl1	14314	13	0.478
Efemp2	58859	Pcolce	18542	13	0.548
Gucy1a3	60596	Mylk	107589	13	0.512
Kcnq1ot1	63830	Ptbp2	56195	13	0.607
Mylk	107589	Tpm2	22004	13	0.563
Nfia	18027	Zfp644	52397	13	0.567
Actg2	11468	Mylk	107589	13.1	0.514
Adamts5	23794	Lox	16948	13.1	0.398
Fam114a1	68303	Fbn1	14118	13.1	0.518
Rbfox2	93686	Rev3l	19714	13.1	0.565
Ckap4	216197	Rbms1	56878	13.2	0.422
Gja1	14609	Ywhag	22628	13.2	0.64
Nid2	18074	Thbs2	21826	13.2	0.459
Apoe	11816	Ctsz	64138	13.3	0.468
Capn6	12338	Igf2	16002	13.3	0.417
Cdh11	12552	Gpx8	69590	13.3	0.506
Ckap4	216197	Serpinh1	12406	13.3	0.425
Cnot2	72068	Kcnq1ot1	63830	13.3	0.645
Col5a1	12831	Loxl2	94352	13.3	0.489
Cpxm1	56264	Mrc2	17534	13.3	0.402
Fbn1	14118	Loxl2	94352	13.3	0.514
Fbn2	14119	Mest	17294	13.3	0.431
Gas1	14451	Gulp1	70676	13.3	0.445
Il6st	16195	Twsg1	65960	13.3	0.605
Islr	26968	Mxra8	74761	13.3	0.526
Maged1	94275	Maged2	80884	13.3	0.429
C1qc	12262	Lyz2	17105	13.4	0.556
Fkbp9	27055	Htra1	56213	13.4	0.382
Col14a1	12818	Postn	50706	13.5	0.491
Col5a1	12831	Fbln2	14115	13.5	0.475
Col6a1	12833	Mmp2	17390	13.5	0.532
Col6a2	12834	Lox	16948	13.5	0.547
D0H4S114	27528	Ptn	19242	13.5	0.45
Mfap2	17150	Mfap4	76293	13.5	0.55
Bgn	12111	Eln	13717	13.6	0.51
Clip3	76686	Fkbp10	14230	13.6	0.446
Islr	26968	Thbs2	21826	13.6	0.512
Lox	16948	Tnc	21923	13.6	0.474
Postn	50706	Rbms3	207181	13.6	0.451
Ccdc80	67896	Col6a1	12833	13.7	0.529
Col1a1	12842	Wisp1	22402	13.7	0.501
Dpt	56429	Lum	17022	13.7	0.524
Emcn	59308	Ramp2	54409	13.7	0.523
Nid1	18073	Timp3	21859	13.7	0.495
Tnc	21923	Wisp1	22402	13.7	0.436
Aebp1	11568	Fkbp10	14230	13.8	0.509
Armcx2	67416	Eid1	58521	13.8	0.483
Mmp14	17387	Ppap2b	67916	13.8	0.402
Aebp1	11568	Col6a1	12833	13.9	0.509
Col5a2	12832	Serpinh1	12406	13.9	0.544
Ahcyl1	229709	Sel1l	20338	14	0.68
Ccdc80	67896	Col5a1	12831	14	0.52
Col3a1	12825	Dlk1	13386	14	0.51
Col6a1	12833	Scara3	219151	14	0.477
Elavl2	15569	Ndn	17984	14	0.668
Esam	69524	Sox18	20672	14	0.558
Fkbp10	14230	Mmp14	17387	14	0.499
Fstl1	14314	Gjc1	14615	14	0.473
Map4k3	225028	Rev3l	19714	14	0.513
Mfap4	76293	Sparcl1	13602	14	0.514
Ndn	17984	Zfp521	225207	14	0.536
Aebp1	11568	Nbl1	17965	14.1	0.424
Bgn	12111	Tagln	21345	14.1	0.543
Cdh5	12562	Esam	69524	14.1	0.566
Cmtm3	68119	Gpx8	69590	14.1	0.462
Col5a2	12832	Fstl1	14314	14.1	0.557
Eln	13717	Fbn1	14118	14.1	0.519
Fbn1	14118	Lama2	16773	14.1	0.535
Fstl1	14314	Gas1	14451	14.1	0.477
Gas1	14451	Scara3	219151	14.1	0.453
Klhl13	67455	Wbp5	22381	14.1	0.477
Lama2	16773	Lum	17022	14.1	0.521
Mmp2	17390	Serpinf1	20317	14.1	0.433
Col5a2	12832	Mxra8	74761	14.2	0.529
Odz3	23965	Rev3l	19714	14.2	0.556
Aebp1	11568	Mmp23	26561	14.3	0.424
Armcx2	67416	Wbp5	22381	14.3	0.496
Cdh11	12552	Reck	53614	14.3	0.455
Col6a1	12833	Copz2	56358	14.3	0.476
Dnm1l	74006	Ywhag	22628	14.3	0.672
Fbln1	14114	Mdk	17242	14.3	0.469
Fstl1	14314	Loxl1	16949	14.3	0.528
Ttc28	209683	Zfp521	225207	14.3	0.439
C1qc	12262	Lyz1	17110	14.4	0.53
Col1a1	12842	Mrc2	17534	14.4	0.541
Col6a1	12833	Tgfb3	21809	14.4	0.461
Fstl1	14314	Leprel4	66180	14.4	0.476
Nid2	18074	Pcolce	18542	14.4	0.452
Adamts2	216725	Mfap4	76293	14.5	0.482
Aebp1	11568	Col1a2	12843	14.5	0.517
Bex2	12069	Meg3	17263	14.5	0.463
Fbn2	14119	Mfap2	17150	14.5	0.523
Nr2f2	11819	Parva	57342	14.5	0.42
Fbxw11	103583	Grb10	14783	14.6	0.594
Fkbp10	14230	Pxdn	69675	14.6	0.458
Acta2	11475	Pmp22	18858	14.7	0.47
Bgn	12111	Pcolce	18542	14.7	0.519
Ccnd2	12444	Ckap4	216197	14.7	0.401
Col1a2	12843	Pcolce	18542	14.7	0.528
Col1a2	12843	Tagln	21345	14.7	0.552
Fstl1	14314	Sparc	20692	14.7	0.506
Mdk	17242	Ptn	19242	14.7	0.443
Ahcyl1	229709	Aplp2	11804	14.8	0.636
Ccdc80	67896	Loxl2	94352	14.8	0.482
Col6a1	12833	Mxra8	74761	14.8	0.52
Col6a2	12834	Scara3	219151	14.8	0.488
Gpx8	69590	Jam3	83964	14.8	0.42
Gucy1b3	54195	Serpine2	20720	14.8	0.423
Mageh1	75625	Mdk	17242	14.8	0.41
H19	14955	Itm2a	16431	14.9	0.389
Ramp2	54409	Tcf21	21412	14.9	0.509
2310035C23Rik	227446	Lama4	16775	15	0.606
Cdh5	12562	Tfpi	21788	15	0.445
Gpc6	23888	Mmp2	17390	15	0.466
Airn	104103	Nfia	18027	15.1	0.42
C1qb	12260	Lyz2	17105	15.1	0.546
Col5a2	12832	Mmp14	17387	15.1	0.508
Col6a2	12834	Thbs2	21826	15.1	0.517
Ctnna2	12386	Dner	227325	15.1	0.433
Fbn1	14118	Ppic	19038	15.1	0.49
Mdk	17242	Mfap2	17150	15.1	0.519
Mrc2	17534	Pcolce	18542	15.1	0.507
Acta2	11475	Fbn1	14118	15.2	0.573
Ccdc80	67896	Pmp22	18858	15.2	0.465
Col1a2	12843	Loxl2	94352	15.2	0.507
Col3a1	12825	Thbs2	21826	15.2	0.527
Il6st	16195	Sel1l	20338	15.2	0.61
Leprel4	66180	Loxl1	16949	15.2	0.483
Maged2	80884	Sgce	20392	15.2	0.426
Armcx2	67416	Gprasp1	67298	15.3	0.438
Col1a2	12843	Fam114a1	68303	15.3	0.503
Ctnna2	12386	Nap1l5	58243	15.3	0.446
Gucy1b3	54195	Lhfp	108927	15.3	0.503
Igf2	16002	Zim1	22776	15.3	0.313
Igfbp2	16008	Klhl13	67455	15.3	0.438
Armcx2	67416	Gprasp2	245607	15.4	0.446
Dlk1	13386	Meg3	17263	15.4	0.464
Dnm1	13429	Lpar1	14745	15.4	0.457
Efemp1	216616	Mgp	17313	15.4	0.437
Acta2	11475	Lum	17022	15.5	0.534
Adamts5	23794	Pcolce	18542	15.5	0.392
Cd47	16423	Dach1	13134	15.5	0.537
Fbn1	14118	Prrx1	18933	15.5	0.503
Gpx8	69590	Phldb2	208177	15.5	0.43
Parva	57342	Sdc2	15529	15.5	0.417
Rab34	19376	Wbp5	22381	15.5	0.47
Sgce	20392	Tgfb1i1	21804	15.5	0.449
Acta2	11475	Nid1	18073	15.6	0.513
Col3a1	12825	Tgfbi	21810	15.6	0.487
Mtdh	67154	Tbc1d12	209478	15.6	0.594
Bgn	12111	Cav1	12389	15.7	0.498
Cald1	109624	Mylk	107589	15.7	0.537
Cdh5	12562	Synpo	104027	15.7	0.499
Col16a1	107581	Fkbp10	14230	15.7	0.472
Ctnnb1	12387	Sel1l	20338	15.7	0.687
Gpm6b	14758	Ogn	18295	15.7	0.448
Armcx1	78248	Wbp5	22381	15.8	0.449
Col3a1	12825	H19	14955	15.8	0.485
Ppap2b	67916	Sparc	20692	15.8	0.424
6330403K07Rik	103712	Peg12	27412	15.9	0.397
Aplp2	11804	Gja1	14609	15.9	0.605
Bgn	12111	Loxl1	16949	15.9	0.543
Col4a1	12826	Fkbp9	27055	15.9	0.437
Dner	227325	Nap1l5	58243	15.9	0.438
Epb4.1l2	13822	Rab18	19330	15.9	0.68
Acta2	11475	Postn	50706	16	0.525
Col6a1	12833	Dcn	13179	16	0.531
D0H4S114	27528	Ndn	17984	16	0.52
Dpt	56429	Pdlim3	53318	16	0.492
Klhl13	67455	Stmn2	20257	16	0.467
Klhl13	67455	Tro	56191	16	0.396
Aebp1	11568	Fbln2	14115	16.1	0.447
Cnn2	12798	Fkbp10	14230	16.1	0.478
Col1a2	12843	Gpx8	69590	16.1	0.516
Col3a1	12825	D0H4S114	27528	16.1	0.485
Gng2	14702	Gpm6b	14758	16.1	0.416
Gpm6b	14758	Gucy1b3	54195	16.1	0.463
Gpx8	69590	Ptn	19242	16.1	0.456
Islr	26968	Leprel2	14789	16.1	0.502
Mgp	17313	Serpine2	20720	16.1	0.413
Col5a2	12832	Gulp1	70676	16.2	0.463
Col6a2	12834	Fmod	14264	16.2	0.475
Fbn1	14118	Lama4	16775	16.2	0.576
Gja1	14609	Utrn	22288	16.2	0.586
Maged2	80884	Myl9	98932	16.2	0.483
Tspan6	56496	Zfp521	225207	16.2	0.454
Col1a1	12842	Thbs2	21826	16.3	0.515
Col3a1	12825	Mfap4	76293	16.4	0.531
Col5a1	12831	Lox	16948	16.4	0.508
Mgp	17313	Ptgis	19223	16.4	0.417
Axl	26362	Fkbp9	27055	16.5	0.405
Ctsh	13036	Tgfbi	21810	16.5	0.477
Fbn1	14118	Pdgfra	18595	16.5	0.533
Fkbp10	14230	Tnc	21923	16.5	0.478
Fstl1	14314	Rcn3	52377	16.5	0.507
Klhl13	67455	Mageh1	75625	16.5	0.419
Lox	16948	Matn2	17181	16.5	0.506
Loxl1	16949	Mmp14	17387	16.5	0.483
Ptn	19242	Sfrp1	20377	16.5	0.419
Armcx1	78248	Klhl13	67455	16.6	0.446
Cav1	12389	Col6a2	12834	16.6	0.503
Igf2	16002	Lama4	16775	16.6	0.514
Mrc2	17534	Prrx1	18933	16.6	0.492
Antxr1	69538	Lpar1	14745	16.7	0.464
C1qb	12260	Ctsh	13036	16.7	0.503
Col6a2	12834	Nid1	18073	16.7	0.538
Ctnna2	12386	Tmem130	243339	16.7	0.464
Eln	13717	Loxl1	16949	16.7	0.491
Id4	15904	Nap1l5	58243	16.7	0.415
Mrc2	17534	Scara3	219151	16.7	0.465
Phldb2	208177	Vasn	246154	16.7	0.39
Pitx2	18741	Tro	56191	16.7	0.345
Col5a2	12832	Fam114a1	68303	16.8	0.493
Col1a1	12842	Gpx8	69590	16.9	0.512
Fbn1	14118	H19	14955	16.9	0.472
Mfap4	76293	Tcf21	21412	16.9	0.49
Antxr1	69538	Vasn	246154	17	0.437
Cmtm3	68119	Fkbp10	14230	17	0.479
Col3a1	12825	Copz2	56358	17	0.502
Fbxw11	103583	Twsg1	65960	17	0.67
Gas1	14451	Mxra8	74761	17	0.461
Leprel4	66180	Maged2	80884	17	0.433
Ndn	17984	Tspan6	56496	17.1	0.514
Nfia	18027	Rev3l	19714	17.1	0.577
Antxr1	69538	Col6a2	12834	17.2	0.521
Cnn2	12798	Tgfb1i1	21804	17.2	0.475
Fbn1	14118	Rcn3	52377	17.2	0.531
Grb10	14783	Meis2	17536	17.2	0.491
Mageh1	75625	Ndn	17984	17.2	0.513
2310035C23Rik	227446	Gnai1	14677	17.3	0.566
6330403K07Rik	103712	Tspan6	56496	17.3	0.429
Acta2	11475	Bgn	12111	17.3	0.537
Cd34	12490	Sparcl1	13602	17.3	0.476
Fkbp10	14230	Nid2	18074	17.3	0.459
Igfbp5	16011	Pmp22	18858	17.3	0.439
Kcnq1ot1	63830	Slit2	20563	17.3	0.669
Malat1	72289	Sbno1	243272	17.3	0.546
Scara3	219151	Serpinf1	20317	17.3	0.409
Bgn	12111	Col4a1	12826	17.4	0.476
Col1a1	12842	Smoc2	64074	17.4	0.461
Ptprd	19266	Sdc2	15529	17.4	0.466
Rev3l	19714	Sel1l	20338	17.4	0.67
Col5a2	12832	Pdgfra	18595	17.5	0.521
Fbn1	14118	Gas1	14451	17.5	0.498
Atrx	22589	Casd1	213819	17.6	0.543
Bgn	12111	Ogn	18295	17.6	0.517
Col3a1	12825	Pmp22	18858	17.6	0.495
Dcn	13179	Fbn1	14118	17.6	0.56
Kcnq1	16535	Slit2	20563	17.6	0.569
Dpp6	13483	Meg3	17263	17.7	0.457
Mfap4	76293	Mrc2	17534	17.7	0.491
Mgp	17313	Tgfbi	21810	17.7	0.457
Prrx1	18933	Scara3	219151	17.7	0.449
Aplp2	11804	Sel1l	20338	17.8	0.629
Ccdc80	67896	Reck	53614	17.8	0.445
Col5a2	12832	Fbln2	14115	17.8	0.482
Col5a2	12832	Islr	26968	17.8	0.555
Pdlim7	67399	Vim	22352	17.8	0.467
Adamts2	216725	Col5a2	12832	17.9	0.503
Armcx2	67416	Ptn	19242	17.9	0.463
Cdh5	12562	Sparcl1	13602	17.9	0.551
Col3a1	12825	Mmp14	17387	17.9	0.511
Fzd2	57265	Rcn3	52377	17.9	0.435
Meis1	17268	Pbx3	18516	17.9	0.461
Nr2f2	11819	Tfpi	21788	17.9	0.396
Antxr1	69538	Gpx8	69590	18	0.486
Col16a1	107581	Mrc2	17534	18	0.464
Col1a1	12842	Lum	17022	18	0.547
Col6a1	12833	Postn	50706	18	0.523
Lox	16948	Ogn	18295	18	0.49
Lum	17022	Nid1	18073	18	0.507
Col3a1	12825	Lama2	16773	18.1	0.535
Ipw	16353	Meg3	17263	18.1	0.415
Bgn	12111	Tfpi	21788	18.2	0.427
Fkbp10	14230	Vasn	246154	18.2	0.423
Mmp14	17387	Rcn3	52377	18.2	0.464
Sel1l	20338	Son	20658	18.2	0.647
Bex2	12069	Tro	56191	18.3	0.371
Cald1	109624	Peg10	170676	18.3	0.54
Caprin1	53872	Gja1	14609	18.3	0.646
Ckap4	216197	Col1a1	12842	18.3	0.426
Col3a1	12825	Timp3	21859	18.3	0.507
Copz2	56358	Islr	26968	18.3	0.468
Emcn	59308	Tcf21	21412	18.3	0.511
Esam	69524	Ramp2	54409	18.3	0.508
Gja1	14609	Rian	75745	18.3	0.534
Gpc6	23888	Parva	57342	18.3	0.421
Lhfp	108927	Maged2	80884	18.3	0.442
Loxl1	16949	Mrc2	17534	18.3	0.515
Mmp14	17387	Tnc	21923	18.3	0.424
Bex2	12069	Nnat	18111	18.4	0.39
Clip3	76686	Tead2	21677	18.4	0.382
Dach1	13134	Gnai1	14677	18.4	0.536
Apoe	11816	Igfbp3	16009	18.5	0.429
Col16a1	107581	Lox	16948	18.5	0.455
Col3a1	12825	Sparc	20692	18.5	0.547
Cpxm1	56264	Mdk	17242	18.5	0.362
Id4	15904	Tspan6	56496	18.5	0.398
Col1a1	12842	Tnc	21923	18.6	0.479
Col1a2	12843	H19	14955	18.6	0.463
Col3a1	12825	Ogn	18295	18.6	0.537
Loxl2	94352	Mmp2	17390	18.6	0.478
Peg12	27412	Tead2	21677	18.6	0.357
Rc3h2	319817	Zfp644	52397	18.6	0.621
Bgn	12111	Col14a1	12818	18.7	0.487
Cav1	12389	Fkbp9	27055	18.7	0.452
Col1a1	12842	Mxra8	74761	18.7	0.522
Efemp1	216616	Tgfbi	21810	18.7	0.415
Gpc3	14734	Sfrp1	20377	18.7	0.397
Lhfp	108927	Tgfb1i1	21804	18.7	0.487
Fkbp10	14230	Selm	114679	18.8	0.419
Fkbp9	27055	Loxl1	16949	18.8	0.46
Gas1	14451	Mrc2	17534	18.8	0.473
Itm2a	16431	Mest	17294	18.8	0.392
Fstl1	14314	H19	14955	18.9	0.443
Acta2	11475	Dcn	13179	19	0.519
Ahcyl1	229709	Ahi1	52906	19	0.55
Gas1	14451	Zfp521	225207	19	0.459
Mdk	17242	Tead2	21677	19	0.391
Mfap4	76293	Ogn	18295	19	0.483
Rbp1	19659	Thbs2	21826	19	0.44
Sox18	20672	Tcf21	21412	19	0.508
Col14a1	12818	Col3a1	12825	19.1	0.5
Fkbp10	14230	Ppic	19038	19.1	0.459
Il6st	16195	S1pr3	13610	19.1	0.491
Mgp	17313	Nid1	18073	19.1	0.47
Cav1	12389	Gas1	14451	19.2	0.454
Ccdc80	67896	Fkbp10	14230	19.2	0.507
Hdgfrp3	29877	Scara3	219151	19.2	0.4
Selm	114679	Tgfb1i1	21804	19.2	0.415
6330403K07Rik	103712	Hdgfrp3	29877	19.3	0.397
Aplp1	11803	Tspan7	21912	19.3	0.462
Cav1	12389	Col6a1	12833	19.3	0.488
Ccdc80	67896	Dcn	13179	19.3	0.501
Col16a1	107581	Fbln2	14115	19.3	0.425
Fam114a1	68303	Lrp1	16971	19.3	0.436
Pgcp	54381	Rnase4	58809	19.3	0.48
Cav1	12389	Ogn	18295	19.4	0.471
Col5a2	12832	Ppic	19038	19.4	0.465
Col6a1	12833	Dpt	56429	19.4	0.507
D0H4S114	27528	Fbn1	14118	19.4	0.48
Gpx8	69590	Tspan6	56496	19.4	0.434
Klhl13	67455	Mest	17294	19.4	0.426
Airn	104103	Rev3l	19714	19.5	0.436
Pon3	269823	Rnase4	58809	19.5	0.407
Adamts2	216725	Lama2	16773	19.6	0.477
Antxr1	69538	Bgn	12111	19.6	0.51
Col5a1	12831	Prrx1	18933	19.6	0.478
Dlk1	13386	Ptn	19242	19.6	0.433
Efemp2	58859	Leprel4	66180	19.6	0.514
Meg3	17263	Nnat	18111	19.6	0.443
Col5a2	12832	Gpx8	69590	19.7	0.5
Cpxm1	56264	Leprel2	14789	19.7	0.376
D0H4S114	27528	Itm2a	16431	19.7	0.405
6330403K07Rik	103712	Ptn	19242	19.8	0.434
Actc1	11464	Tnni1	21952	19.8	0.414
Adamts2	216725	Tfpi	21788	19.8	0.398
Antxr1	69538	Sparc	20692	19.8	0.491
Caprin1	53872	Twsg1	65960	19.8	0.672
Cnn2	12798	Pdlim7	67399	19.8	0.454
Col3a1	12825	Gpx7	67305	19.8	0.439
Col6a2	12834	Fam114a1	68303	19.8	0.487
Lum	17022	Pdgfra	18595	19.8	0.502
Parva	57342	Ppap2b	67916	19.8	0.38
Antxr1	69538	Mrc2	17534	19.9	0.496
Caprin1	53872	Stag1	20842	19.9	0.619
Col3a1	12825	Dpt	56429	19.9	0.537
Csrp1	13007	Myl9	98932	19.9	0.53
Itm2a	16431	Ndn	17984	19.9	0.49
Nid1	18073	Pmp22	18858	19.9	0.455
Nid1	18073	Tagln	21345	19.9	0.49
Tro	56191	Zdbf2	319584	19.9	0.336
2310035C23Rik	227446	Dach1	13134	20	0.598
Acta2	11475	Loxl1	16949	20	0.516
Aspn	66695	Col1a1	12842	20	0.496
Dnm1	13429	Vsnl1	26950	20	0.481
Emcn	59308	Sparcl1	13602	20	0.527
Gpx7	67305	Mmp23	26561	20	0.387
Pdlim7	67399	Tpm1	22003	20	0.511
Acta2	11475	Col1a1	12842	20.1	0.536
Cmtm3	68119	Gpx7	67305	20.1	0.41
Cpxm1	56264	Mmp14	17387	20.1	0.365
Fbn1	14118	Plagl1	22634	20.1	0.446
Fbn2	14119	Plagl1	22634	20.1	0.403
Fkbp9	27055	Maged1	94275	20.1	0.41
Gjc1	14615	Tspan6	56496	20.1	0.434
Igfbp3	16009	Sparcl1	13602	20.1	0.462
Mgp	17313	Scara3	219151	20.1	0.449
Aspn	66695	Col6a1	12833	20.2	0.482
Cdh11	12552	Mgp	17313	20.2	0.48
Clip3	76686	Dnm1	13429	20.2	0.427
Col1a1	12842	Igf2	16002	20.2	0.494
Col1a1	12842	Islr	26968	20.2	0.547
Fkbp10	14230	Tead2	21677	20.2	0.424
Gpx8	69590	Nnat	18111	20.2	0.423
Impact	16210	Ptbp2	56195	20.2	0.485
Loxl1	16949	Tnc	21923	20.2	0.467
Lum	17022	Tagln	21345	20.2	0.507
Mfap4	76293	Ttc28	209683	20.2	0.424
Ccdc80	67896	Fstl1	14314	20.4	0.489
Cmtm3	68119	Pmp22	18858	20.4	0.432
Col3a1	12825	Sparcl1	13602	20.4	0.557
Itm2a	16431	Lum	17022	20.4	0.433
Lyz1	17110	Tgfbi	21810	20.4	0.46
Mageh1	75625	Tspan7	21912	20.4	0.432
Ndn	17984	Reck	53614	20.4	0.487
Aebp1	11568	Copz2	56358	20.5	0.429
D0H4S114	27528	Mageh1	75625	20.5	0.409
Fam114a1	68303	Lum	17022	20.5	0.478
Klhl13	67455	Ptprf	19268	20.5	0.473
Cd34	12490	Col3a1	12825	20.6	0.485
Col1a1	12842	Fam114a1	68303	20.6	0.485
Ctnnb1	12387	Ptprf	19268	20.6	0.553
Mest	17294	Tspan6	56496	20.6	0.407
Cav1	12389	Ppap2b	67916	20.7	0.391
Enah	13800	Nbea	26422	20.7	0.403
Gpx8	69590	Ppic	19038	20.7	0.421
Mgp	17313	Sparcl1	13602	20.7	0.485
Mmp23	26561	Synpo	104027	20.7	0.424
Sfrp2	20319	Tspan6	56496	20.7	0.386
Cdkn1c	12577	Tspan6	56496	20.8	0.405
Col3a1	12825	Serping1	12258	20.8	0.517
Csrp1	13007	Tspan7	21912	20.8	0.497
Fbln1	14114	Mgp	17313	20.8	0.469
Fbln2	14115	Tnc	21923	20.8	0.414
Gpx8	69590	Serpinh1	12406	20.8	0.469
Gucy1a3	60596	Thbd	21824	20.8	0.412
Mmp23	26561	Wt1	22431	20.8	0.36
Fbn1	14118	Tgfb3	21809	20.9	0.457
Fstl1	14314	Gpx8	69590	20.9	0.471
Adamts5	23794	Ogn	18295	21	0.387
Col3a1	12825	Ppic	19038	21	0.483
Col5a1	12831	Tgfb1i1	21804	21	0.496
Fbn1	14118	Gpx7	67305	21	0.437
Gdi2	14569	Scd2	20250	21	0.609
Kcnq1ot1	63830	Nfia	18027	21	0.58
Rcn3	52377	Vasn	246154	21	0.411
Sgce	20392	Syt11	229521	21	0.4
Col5a1	12831	Mmp14	17387	21.1	0.453
Col6a2	12834	Dlk1	13386	21.1	0.467
Cpxm1	56264	Fkbp10	14230	21.1	0.382
Acta2	11475	Cald1	109624	21.2	0.528
Bgn	12111	Mmp14	17387	21.2	0.473
Bgn	12111	Mmp2	17390	21.2	0.511
Cald1	109624	Gng11	66066	21.2	0.567
Col16a1	107581	Mxra8	74761	21.2	0.45
Dner	227325	Tmem130	243339	21.2	0.439
Igfbp5	16011	Ttc28	209683	21.2	0.413
Loxl1	16949	Mfap4	76293	21.2	0.489
Loxl1	16949	Tagln	21345	21.2	0.504
Postn	50706	Wisp1	22402	21.2	0.456
Armcx2	67416	Ccnd2	12444	21.3	0.41
Ccdc80	67896	Lama4	16775	21.3	0.526
Col6a2	12834	Tgfb1i1	21804	21.3	0.524
Gprasp2	245607	Odz3	23965	21.3	0.465
Rc3h2	319817	Rpn1	103963	21.3	0.636
Rcn3	52377	Tead2	21677	21.3	0.41
Armcx1	78248	Tmsb4x	19241	21.4	0.425
Col4a1	12826	Serpine2	20720	21.4	0.395
Lox	16948	Nid1	18073	21.4	0.486
Loxl2	94352	Pxdn	69675	21.4	0.419
Nid1	18073	Sparc	20692	21.4	0.486
Pdgfra	18595	Sparc	20692	21.4	0.484
Tspan7	21912	Vsnl1	26950	21.4	0.479
Bgn	12111	Sdc2	15529	21.5	0.431
Col3a1	12825	Igf2	16002	21.5	0.51
Col6a1	12833	Eln	13717	21.5	0.476
Gpc6	23888	Hdgfrp3	29877	21.5	0.405
Gpx8	69590	Vasn	246154	21.5	0.408
Bgn	12111	Postn	50706	21.6	0.52
Fbn1	14118	Postn	50706	21.6	0.532
Gpx8	69590	Loxl1	16949	21.6	0.482
Nr2f2	11819	Wt1	22431	21.6	0.37
Ctnna2	12386	Syt1	20979	21.7	0.469
Lrp1	16971	Mmp2	17390	21.7	0.439
Acta2	11475	Ogn	18295	21.8	0.49
Cntn1	12805	Gpm6b	14758	21.8	0.4
Col1a1	12842	Tagln	21345	21.8	0.523
Col5a2	12832	Dcn	13179	21.8	0.529
Eln	13717	Mgp	17313	21.8	0.448
Fstl1	14314	Itm2a	16431	21.8	0.43
Nbl1	17965	Rbp1	19659	21.8	0.387
Antxr1	69538	Col5a2	12832	21.9	0.509
Cntn1	12805	Dner	227325	21.9	0.406
Copz2	56358	Pon3	269823	21.9	0.373
Fbln1	14114	Rcn3	52377	21.9	0.483
Mdk	17242	Sfrp2	20319	21.9	0.377
Meis1	17268	Zfp521	225207	21.9	0.464
Nnat	18111	Tspan6	56496	21.9	0.399
Axl	26362	Bgn	12111	22	0.415
Cald1	109624	Maged2	80884	22	0.461
Loxl1	16949	Mmp23	26561	22	0.423
Nbl1	17965	Vasn	246154	22	0.376
D0H4S114	27528	Ppp1r9a	243725	22.1	0.391
Dner	227325	Ndrg4	234593	22.1	0.389
Dnm1l	74006	Son	20658	22.1	0.64
Fstl1	14314	Loxl2	94352	22.1	0.46
Selm	114679	Tpm2	22004	22.1	0.421
Cav1	12389	Fbn1	14118	22.2	0.494
Cdh11	12552	Col1a2	12843	22.2	0.525
Col1a2	12843	Mmp14	17387	22.2	0.481
Dcn	13179	Rnase4	58809	22.2	0.486
Postn	50706	Sparcl1	13602	22.2	0.52
Col6a2	12834	Ltbp4	108075	22.3	0.469
Nrxn3	18191	Syt1	20979	22.3	0.57
Cd34	12490	Sox18	20672	22.4	0.447
Fstl1	14314	Vasn	246154	22.4	0.416
Gpx7	67305	Lama2	16773	22.4	0.413
Gpx7	67305	Loxl2	94352	22.4	0.4
Itm2a	16431	Ppic	19038	22.4	0.373
Leprel2	14789	Selm	114679	22.4	0.405
Acta2	11475	Pdlim3	53318	22.6	0.487
Add3	27360	Lasp1	16796	22.6	0.68
Col4a1	12826	Col5a2	12832	22.6	0.465
Col6a1	12833	Sparc	20692	22.6	0.495
Col6a2	12834	Tgfb3	21809	22.6	0.453
Fzd2	57265	Gpx7	67305	22.6	0.388
Islr	26968	Mfap4	76293	22.6	0.488
Aplp2	11804	Scd2	20250	22.7	0.563
Caprin1	53872	Sel1l	20338	22.7	0.688
Ccdc80	67896	Fkbp9	27055	22.7	0.452
Smoc2	64074	Thbs2	21826	22.7	0.409
Actc1	11464	Pdlim3	53318	22.8	0.484
Bex2	12069	Klhl13	67455	22.8	0.408
Cdh11	12552	Pmp22	18858	22.8	0.455
Mmp14	17387	Ppic	19038	22.8	0.403
Armcx1	78248	Rab34	19376	22.9	0.433
Dcn	13179	Nid1	18073	22.9	0.487
Mtch1	56462	Selm	114679	22.9	0.403
Ramp2	54409	Sparcl1	13602	22.9	0.501
Adamts2	216725	Aebp1	11568	23	0.438
Adamts2	216725	Col1a2	12843	23	0.488
C1qa	12259	Ctsh	13036	23	0.49
Cav1	12389	Ccdc80	67896	23	0.467
Col1a1	12842	Gas1	14451	23	0.476
Efemp1	216616	Rbp1	19659	23	0.383
Rab34	19376	Vim	22352	23	0.446
Armcx1	78248	Nbea	26422	23.1	0.403
Bgn	12111	Thbs2	21826	23.1	0.49
Cav1	12389	Dpt	56429	23.1	0.462
Ccnd2	12444	Fstl1	14314	23.1	0.415
Armcx1	78248	Pxdn	69675	23.2	0.416
Cd36	12491	Dpt	56429	23.2	0.457
Dcn	13179	Thbs2	21826	23.2	0.477
Islr	26968	Mrc2	17534	23.2	0.499
Klc1	16593	Pja2	224938	23.2	0.564
Mrc2	17534	Tgfb3	21809	23.2	0.441
Col14a1	12818	Dcn	13179	23.3	0.467
Postn	50706	Thbs2	21826	23.3	0.481
Serpinh1	12406	Tfpi	21788	23.3	0.402
Armcx2	67416	Igdcc4	56741	23.4	0.467
Clip3	76686	Slc22a17	59049	23.4	0.383
Cntn3	18488	Efemp1	216616	23.4	0.359
Ctsh	13036	Lyz1	17110	23.4	0.495
Dlk1	13386	H19	14955	23.4	0.388
Gucy1a3	60596	Reck	53614	23.4	0.422
Islr	26968	Reck	53614	23.4	0.434
Lhfp	108927	Tpm2	22004	23.4	0.496
Itm2a	16431	Maged2	80884	23.5	0.397
Loxl1	16949	Postn	50706	23.5	0.505
Meg3	17263	Sfrp1	20377	23.5	0.43
Pdgfra	18595	Thbd	21824	23.5	0.416
Runx1t1	12395	Tgfb2	21808	23.5	0.397
Sox11	20666	Tead2	21677	23.6	0.374
2310035C23Rik	227446	Lamc1	226519	23.7	0.598
Bgn	12111	Col16a1	107581	23.7	0.458
Col5a2	12832	Tagln	21345	23.7	0.516
D0H4S114	27528	Ptprd	19266	23.7	0.481
Fam114a1	68303	Postn	50706	23.7	0.468
Gas1	14451	Gpc6	23888	23.7	0.435
Nid1	18073	Tfpi	21788	23.7	0.406
Ogn	18295	Thbs2	21826	23.7	0.47
Capn6	12338	Zim1	22776	23.8	0.277
Klhl13	67455	Ltbp4	108075	23.8	0.429
Mrc2	17534	Rcn3	52377	23.8	0.491
Cdh11	12552	Serpine2	20720	23.9	0.41
Col3a1	12825	Rcn3	52377	23.9	0.528
Col6a1	12833	Leprel2	14789	23.9	0.478
Maged2	80884	Selm	114679	23.9	0.393
2310035C23Rik	227446	Rbfox2	93686	24	0.561
Col1a2	12843	Mrc2	17534	24	0.52
Dcn	13179	Lama2	16773	24	0.487
Fam114a1	68303	Myl9	98932	24	0.484
Fstl1	14314	Klhl13	67455	24	0.464
Gulp1	70676	Zfp521	225207	24	0.441
Igfbp3	16009	Timp3	21859	24	0.435
Lama4	16775	Rbfox2	93686	24	0.526
Ptn	19242	Tspan6	56496	24	0.421
Rcn3	52377	Vim	22352	24.1	0.469
Scg2	20254	Syt1	20979	24.1	0.451
Aebp1	11568	Bgn	12111	24.2	0.468
Armcx1	78248	Bhlhb9	70237	24.2	0.393
Calcr	12311	Hap1	15114	24.2	0.322
Mest	17294	Ptn	19242	24.2	0.41
Antxr1	69538	Col6a1	12833	24.3	0.496
Fbn2	14119	Fkbp10	14230	24.3	0.447
Peg3	18616	Pja2	224938	24.3	0.537
Col14a1	12818	Mfap4	76293	24.4	0.458
Col1a1	12842	Sparc	20692	24.4	0.505
Fkbp10	14230	Wisp1	22402	24.4	0.455
Fstl1	14314	Sfrp2	20319	24.4	0.416
Gas1	14451	Gpx8	69590	24.4	0.444
Odz3	23965	Ptn	19242	24.4	0.476
Adamts2	216725	Lum	17022	24.5	0.47
Aebp1	11568	Leprel4	66180	24.5	0.426
Cend1	57754	Elavl3	15571	24.5	0.43
Col1a2	12843	Leprel2	14789	24.5	0.49
Col5a1	12831	Wisp1	22402	24.5	0.442
Gulp1	70676	Sdc2	15529	24.5	0.404
Lama2	16773	Nfia	18027	24.5	0.481
Loxl2	94352	Mrc2	17534	24.5	0.459
Mest	17294	Odz3	23965	24.5	0.456
Gja1	14609	Rab18	19330	24.6	0.63
Parva	57342	Sparc	20692	24.6	0.432
Aplp1	11803	Vsnl1	26950	24.7	0.446
Bgn	12111	Lum	17022	24.7	0.515
Col16a1	107581	Loxl1	16949	24.7	0.452
Col1a2	12843	Scara3	219151	24.7	0.464
Col1a2	12843	Wisp1	22402	24.7	0.459
Col5a2	12832	Mrc2	17534	24.7	0.51
Col6a1	12833	Fbln2	14115	24.7	0.462
Col6a1	12833	Mfap4	76293	24.7	0.483
Gpc3	14734	Mest	17294	24.7	0.394
Leprel2	14789	Mmp2	17390	24.7	0.465
Mtch1	56462	Pea15a	18611	24.7	0.402
Rbp1	19659	Scara3	219151	24.7	0.407
Col5a2	12832	Loxl2	94352	24.8	0.48
Col6a2	12834	Fstl1	14314	24.8	0.511
Mxra8	74761	Rcn3	52377	24.8	0.469
Fstl1	14314	Mmp2	17390	24.9	0.482
Klhl13	67455	Ndn	17984	24.9	0.549
Klhl13	67455	Tmsb4x	19241	24.9	0.423
Cnot2	72068	Tek	21687	25	0.612
Cntn3	18488	Mmp2	17390	25	0.4
Col1a2	12843	Ppic	19038	25	0.456
Fkbp10	14230	Lox	16948	25	0.487
Meg3	17263	Resp18	19711	25	0.446
Ogn	18295	Pdlim3	53318	25	0.471
Ogn	18295	Sparcl1	13602	25	0.491
Asb4	65255	Pitx2	18741	25.1	0.294
Ctsz	64138	Pon2	330260	25.1	0.396
Dnm1l	74006	Rab18	19330	25.1	0.666
Gas1	14451	Pmp22	18858	25.1	0.433
Meis2	17536	Runx1t1	12395	25.2	0.416
Adamts2	216725	Col3a1	12825	25.3	0.503
Cd81	12520	Vim	22352	25.3	0.398
Cdkn1c	12577	Pitx2	18741	25.3	0.341
Fbxw11	103583	Gja1	14609	25.3	0.627
Fkbp10	14230	Tgfb1i1	21804	25.3	0.495
Gpx8	69590	Sgce	20392	25.3	0.421
Arhgef25	52666	Pxdn	69675	25.4	0.447
Col5a1	12831	Postn	50706	25.4	0.488
Pxdn	69675	Rbms1	56878	25.4	0.419
Col6a2	12834	Fbln2	14115	25.5	0.468
Efemp2	58859	Gpx8	69590	25.5	0.521
Fbln1	14114	Mrc2	17534	25.5	0.479
Mmp2	17390	Reck	53614	25.5	0.427
Nid1	18073	Pdgfra	18595	25.5	0.482
Parva	57342	Pea15a	18611	25.5	0.381
Col5a2	12832	Dlk1	13386	25.6	0.458
Fstl1	14314	Plagl1	22634	25.6	0.425
Aebp1	11568	Mrc2	17534	25.7	0.456
Cav1	12389	Col1a1	12842	25.7	0.484
Col1a2	12843	Fbln2	14115	25.7	0.465
Islr	26968	Nid1	18073	25.7	0.489
Bex1	19716	Stmn2	20257	25.8	0.423
Ccdc80	67896	Tgfb1i1	21804	25.8	0.48
Col6a2	12834	Pdlim3	53318	25.8	0.5
D0H4S114	27528	Mest	17294	25.8	0.406
Dlk1	13386	Fbn1	14118	25.8	0.46
Efemp1	216616	Thbs2	21826	25.8	0.404
Gpm6b	14758	Nbea	26422	25.8	0.39
Ccdc80	67896	Copz2	56358	25.9	0.435
Clip3	76686	Nnat	18111	25.9	0.378
Csrp1	13007	Tagln	21345	25.9	0.494
Epb4.1l2	13822	Klc1	16593	25.9	0.622
Fbln1	14114	Nid2	18074	25.9	0.442
Mmp2	17390	Sgce	20392	25.9	0.423
Ppp1r9a	243725	Tspan7	21912	25.9	0.415
Ahi1	52906	Mtap1b	17755	26	0.444
Fmod	14264	Pcolce	18542	26	0.415
Pmp22	18858	Ptgis	19223	26	0.392
Cdh11	12552	Nid1	18073	26.1	0.486
Col6a1	12833	Thbs2	21826	26.1	0.477
Htra1	56213	Sparc	20692	26.1	0.384
Islr	26968	Tgfb3	21809	26.1	0.438
Loxl2	94352	Rcn3	52377	26.1	0.439
Loxl2	94352	Tagln	21345	26.1	0.437
Pcolce	18542	Rcn3	52377	26.1	0.461
Fbn2	14119	Fstl1	14314	26.2	0.44
Kcnq1ot1	63830	Map4k3	225028	26.2	0.51
Antxr1	69538	Rcn3	52377	26.3	0.485
Col6a1	12833	Lama2	16773	26.3	0.489
Col6a1	12833	Mgp	17313	26.3	0.469
Col6a1	12833	Mrc2	17534	26.3	0.496
Col6a2	12834	Gas1	14451	26.3	0.473
Epb4.1l2	13822	Sel1l	20338	26.3	0.651
Klc1	16593	Tspan7	21912	26.3	0.522
Mgp	17313	Ogn	18295	26.3	0.46
Armcx2	67416	Bex2	12069	26.4	0.418
Aebp1	11568	Lrp1	16971	26.5	0.422
Antxr1	69538	Postn	50706	26.5	0.488
Cav1	12389	Col5a2	12832	26.5	0.482
Ctsz	64138	Tgfbi	21810	26.5	0.44
Emcn	59308	Serping1	12258	26.5	0.464
Fbn1	14118	Tfpi	21788	26.5	0.415
Odz3	23965	Tro	56191	26.5	0.425
Phldb2	208177	Sparc	20692	26.5	0.426
Reck	53614	Sgce	20392	26.5	0.396
Actc1	11464	Tpm2	22004	26.6	0.514
Col3a1	12825	Tagln	21345	26.6	0.526
Col3a1	12825	Thbd	21824	26.6	0.431
Col4a1	12826	Nid1	18073	26.6	0.436
Hipk2	15258	Rev3l	19714	26.6	0.484
6330403K07Rik	103712	Ndn	17984	26.7	0.524
Aebp1	11568	Fmod	14264	26.7	0.409
Cd47	16423	Nfia	18027	26.7	0.475
Col4a1	12826	Fstl1	14314	26.7	0.44
Fkbp10	14230	Tagln	21345	26.7	0.489
Gpc6	23888	Nr2f1	13865	26.7	0.412
Mmp23	26561	Mrc2	17534	26.7	0.422
Actg2	11468	Col1a1	12842	26.8	0.476
Apoe	11816	Serping1	12258	26.8	0.435
Cpxm1	56264	Tro	56191	26.8	0.335
Ctsh	13036	Lyz2	17105	26.8	0.5
Dock1	330662	Gnai1	14677	26.8	0.552
Gpx8	69590	Rbp1	19659	26.8	0.417
Itih5	209378	Lama2	16773	26.8	0.351
Igf2	16002	Ptn	19242	26.9	0.435
Lima1	65970	Snord116	64243	26.9	0.563
2310035C23Rik	227446	Kcnq1ot1	63830	27	0.637
Col5a2	12832	H19	14955	27	0.436
Rnase4	58809	Sdc2	15529	27	0.424
Capn6	12338	Itm2a	16431	27.1	0.345
Fbn1	14118	Mxra8	74761	27.1	0.506
Lama4	16775	Sparcl1	13602	27.1	0.53
Loxl1	16949	Sparc	20692	27.1	0.483
Tagln	21345	Timp3	21859	27.1	0.448
Axl	26362	Cav1	12389	27.2	0.393
Ckap4	216197	Col5a2	12832	27.2	0.418
Col3a1	12825	Tgfb2	21808	27.2	0.447
Col5a1	12831	Pxdn	69675	27.2	0.424
Emcn	59308	Timp3	21859	27.2	0.452
Loxl1	16949	Pcolce	18542	27.2	0.474
Bex1	19716	Fstl1	14314	27.3	0.437
Dnm1	13429	Klc1	16593	27.3	0.536
Fam114a1	68303	Mxra8	74761	27.3	0.45
Loxl1	16949	Vasn	246154	27.3	0.406
Axl	26362	Ppap2b	67916	27.4	0.363
Col5a2	12832	Fkbp9	27055	27.4	0.456
Gas1	14451	Pxdn	69675	27.4	0.419
Itm2a	16431	Tgfbr3	21814	27.4	0.377
Acta2	11475	Col6a1	12833	27.5	0.499
Cav1	12389	Fstl1	14314	27.5	0.459
Col3a1	12825	Dab2	13132	27.5	0.485
Dcn	13179	Timp3	21859	27.5	0.454
Fbn1	14118	Pdlim3	53318	27.5	0.496
Gpc3	14734	Meis2	17536	27.5	0.416
Gprasp2	245607	Nbea	26422	27.5	0.379
Mfap2	17150	Plagl1	22634	27.5	0.455
Ptprd	19266	Tcf21	21412	27.5	0.525
Ramp2	54409	Serping1	12258	27.5	0.456
Bgn	12111	Rbp1	19659	27.6	0.44
Col1a1	12842	Tgfb2	21808	27.6	0.44
Dlk1	13386	Maged2	80884	27.6	0.412
Esam	69524	Myl9	98932	27.6	0.52
Acta2	11475	Copz2	56358	27.7	0.434
Elavl2	15569	Rc3h2	319817	27.7	0.667
Fbn1	14118	Lrp1	16971	27.7	0.45
Acta2	11475	Col5a1	12831	27.8	0.478
Col6a2	12834	Mrc2	17534	27.8	0.508
Efemp2	58859	Parva	57342	27.8	0.48
Fbn1	14118	Wisp1	22402	27.8	0.457
Gas1	14451	Islr	26968	27.8	0.459
Grb10	14783	Twsg1	65960	27.8	0.568
Meg3	17263	Nrxn3	18191	27.8	0.549
Nfia	18027	Rbms3	207181	27.8	0.421
Nid1	18073	Postn	50706	27.8	0.482
Add1	11518	Fbxw11	103583	27.9	0.579
Bgn	12111	Fstl1	14314	27.9	0.491
C1qc	12262	Ctsh	13036	27.9	0.484
Casd1	213819	Twsg1	65960	27.9	0.53
Cdh5	12562	Tcf21	21412	27.9	0.5
Cds2	110911	Zrsr1	22183	27.9	0.334
Col16a1	107581	Col3a1	12825	27.9	0.469
Col5a1	12831	Tagln	21345	27.9	0.465
Col5a2	12832	Prrx1	18933	27.9	0.483
Gpx7	67305	Leprel2	14789	27.9	0.404
Islr	26968	Nbl1	17965	27.9	0.421
Lox	16948	Loxl1	16949	27.9	0.476
Mgp	17313	Smoc2	64074	27.9	0.399
Nid1	18073	Sparcl1	13602	27.9	0.489
Pon2	330260	Tmed3	66111	27.9	0.382
Rbms1	56878	Vim	22352	27.9	0.439
Serping1	12258	Sparcl1	13602	27.9	0.475
Acta2	11475	Islr	26968	28	0.495
Actg2	11468	Lum	17022	28	0.458
Cdh11	12552	Ptgis	19223	28	0.409
Cdh11	12552	Smoc2	64074	28	0.415
Col16a1	107581	Col6a1	12833	28	0.451
Il6st	16195	Tgfbr3	21814	28	0.442
Lox	16948	Tagln	21345	28	0.457
Loxl1	16949	Wisp1	22402	28	0.444
Meg3	17263	Peg3	18616	28	0.5
Ndn	17984	Ppp1r9a	243725	28	0.43
Gprasp2	245607	Tro	56191	28.1	0.361
Jam3	83964	Rcn3	52377	28.1	0.397
Mageh1	75625	Tspan6	56496	28.1	0.393
Dner	227325	Stmn2	20257	28.2	0.417
Fam114a1	68303	Mrc2	17534	28.2	0.458
Klhl13	67455	Phlda2	22113	28.2	0.411
Lrp1	16971	Rbms1	56878	28.2	0.421
Postn	50706	Rbp1	19659	28.2	0.432
Ptn	19242	Zfp521	225207	28.2	0.445
Resp18	19711	Th	21823	28.2	0.386
Sgce	20392	Smoc2	64074	28.2	0.383
Acta2	11475	Cnn2	12798	28.3	0.446
Arhgef25	52666	Fstl1	14314	28.3	0.493
Col5a2	12832	Mfap4	76293	28.3	0.487
Fam114a1	68303	Reck	53614	28.3	0.417
Gucy1a3	60596	Lhfp	108927	28.3	0.441
Jam3	83964	Leprel4	66180	28.3	0.387
Lamc1	226519	Sel1l	20338	28.3	0.607
Myl9	98932	Pmp22	18858	28.3	0.463
Nrk	27206	Sct	20287	28.4	0.339
Gpx8	69590	Tead2	21677	28.5	0.393
Itm2a	16431	Rcn3	52377	28.5	0.4
Phldb2	208177	Pxdn	69675	28.5	0.391
Aebp1	11568	Col3a1	12825	28.6	0.486
Bex2	12069	Tspan6	56496	28.6	0.379
Col3a1	12825	Fkbp10	14230	28.6	0.534
Gpx8	69590	Parva	57342	28.6	0.414
Loxl2	94352	Postn	50706	28.6	0.443
Lpar1	14745	Pdgfra	18595	28.6	0.436
Lrp1	16971	Rcn3	52377	28.6	0.425
Mest	17294	Ndn	17984	28.6	0.489
Mxra8	74761	Postn	50706	28.6	0.473
Nbea	26422	Ndrg4	234593	28.6	0.365
Aspn	66695	Lum	17022	28.7	0.459
Col3a1	12825	Tgfb3	21809	28.7	0.45
Serping1	12258	Timp3	21859	28.7	0.447
Cmtm3	68119	Vasn	246154	28.8	0.391
Gas1	14451	Igfbp5	16011	28.8	0.43
Nr2f1	13865	Sox11	20666	28.8	0.383
Ak3	56248	Klc1	16593	28.9	0.566
Antxr1	69538	Sparcl1	13602	28.9	0.491
Armcx2	67416	Fkbp10	14230	28.9	0.478
Col1a2	12843	Lama2	16773	28.9	0.5
Aplp1	11803	Bex1	19716	29	0.405
Bgn	12111	Scara3	219151	29	0.449
Bhlhb9	70237	Casd1	213819	29	0.411
Col14a1	12818	Serping1	12258	29	0.453
Col1a2	12843	Igf2	16002	29	0.48
Col5a2	12832	Mmp2	17390	29	0.5
Itsn1	16443	Mtdh	67154	29	0.54
Jam3	83964	Syt11	229521	29	0.376
Matn2	17181	Ogn	18295	29	0.481
Mfap4	76293	Mxra8	74761	29	0.456
Mmp14	17387	Vasn	246154	29	0.384
Cd34	12490	Islr	26968	29.1	0.442
Mxra8	74761	Tgfb3	21809	29.1	0.422
Ahcyl1	229709	Copg2	54160	29.2	0.476
D0H4S114	27528	H19	14955	29.2	0.384
Dpt	56429	Postn	50706	29.2	0.478
Fstl1	14314	Ltbp4	108075	29.2	0.437
Dcn	13179	Fam114a1	68303	29.3	0.454
Fbln2	14115	Leprel2	14789	29.3	0.42
Fzd2	57265	Ptn	19242	29.3	0.403
Adamts2	216725	Fbln2	14115	29.4	0.411
Arhgef25	52666	Clip3	76686	29.4	0.435
Armcx2	67416	Gjc1	14615	29.4	0.44
Cav1	12389	Pmp22	18858	29.4	0.423
Col3a1	12825	Tnc	21923	29.4	0.47
Ctsz	64138	Nid2	18074	29.4	0.421
D0H4S114	27528	Fbn2	14119	29.4	0.407
Jam3	83964	Sfrp1	20377	29.4	0.368
Cdh5	12562	Timp3	21859	29.5	0.467
Col4a1	12826	Pxdn	69675	29.5	0.404
Gas1	14451	Ttc28	209683	29.5	0.411
Gulp1	70676	Rev3l	19714	29.5	0.457
Ptgis	19223	Tgfbi	21810	29.5	0.389
Bex2	12069	Cdkn1c	12577	29.6	0.371
Bex2	12069	Ndn	17984	29.6	0.514
Epb4.1l2	13822	Il6st	16195	29.6	0.586
Fstl1	14314	Wbp5	22381	29.6	0.457
Gpm6b	14758	Pja2	224938	29.6	0.456
Islr	26968	Lama2	16773	29.6	0.487
Arhgef25	52666	Meg3	17263	29.7	0.486
Cav1	12389	Htra1	56213	29.7	0.352
Col14a1	12818	Islr	26968	29.7	0.464
Col4a1	12826	Timp3	21859	29.7	0.424
Fbn1	14118	Thbd	21824	29.7	0.422
Gjc1	14615	Leprel4	66180	29.7	0.425
Gng2	14702	Klc1	16593	29.7	0.448
Ppap2b	67916	S1pr3	13610	29.7	0.368
Add1	11518	Pja2	224938	29.9	0.537
Cdh11	12552	Col5a2	12832	29.9	0.505
Cdh5	12562	Serping1	12258	29.9	0.473
Mgp	17313	Mmp2	17390	29.9	0.458
Col1a1	12842	Copz2	56358	30	0.443
Col6a2	12834	Tpm2	22004	30	0.538
Fstl1	14314	Maged2	80884	30	0.437
Loxl1	16949	Lum	17022	30	0.491
Nnat	18111	Pitx2	18741	30	0.328
Col3a1	12825	Rbp1	19659	30.1	0.452
Apoe	11816	Cd81	12520	30.2	0.372
Cd34	12490	Emcn	59308	30.2	0.43
Col1a1	12842	Tgfb1i1	21804	30.2	0.497
Col1a2	12843	Dlk1	13386	30.2	0.451
Col1a2	12843	Smoc2	64074	30.2	0.423
Loxl1	16949	Scara3	219151	30.2	0.443
Nap1l5	58243	Resp18	19711	30.2	0.413
Col3a1	12825	Col4a1	12826	30.3	0.462
Col3a1	12825	Igfbp5	16011	30.3	0.476
Dpp6	13483	Resp18	19711	30.3	0.414
Gpx7	67305	Selm	114679	30.3	0.362
Sel1l	20338	Twsg1	65960	30.3	0.636
Gpc3	14734	Mageh1	75625	30.4	0.387
Gulp1	70676	Islr	26968	30.4	0.436
Kitl	17311	Rbms3	207181	30.4	0.387
Actg2	11468	Col5a1	12831	30.5	0.433
Bex2	12069	Stmn2	20257	30.5	0.396
Gas1	14451	Prrx1	18933	30.5	0.438
Nid1	18073	Ogn	18295	30.5	0.468
Vasn	246154	Wisp1	22402	30.5	0.379
Aebp1	11568	Mmp14	17387	30.6	0.422
Col6a2	12834	H19	14955	30.6	0.429
Gnai1	14677	Rev3l	19714	30.6	0.537
Lum	17022	Tnc	21923	30.6	0.429
Bgn	12111	Fkbp9	27055	30.7	0.447
Cmtm3	68119	Serpinh1	12406	30.7	0.431
Klhl13	67455	Selm	114679	30.7	0.383
Lrp1	16971	Serpinf1	20317	30.7	0.386
Myl9	98932	Selm	114679	30.7	0.408
Col6a2	12834	Loxl2	94352	30.8	0.467
Dcn	13179	Mxra8	74761	30.8	0.46
Loxl1	16949	Ppic	19038	30.8	0.412
Nap1l5	58243	Tmem130	243339	30.8	0.441
Ahcyl1	229709	Dnm1l	74006	30.9	0.647
Aspn	66695	Islr	26968	30.9	0.456
Gpc3	14734	Gpc6	23888	30.9	0.407
Gprasp2	245607	Mageh1	75625	30.9	0.379
Id4	15904	Mageh1	75625	30.9	0.377
Cntn3	18488	Ptgis	19223	31	0.349
Col16a1	107581	Col1a2	12843	31	0.454
Col16a1	107581	Eln	13717	31	0.406
Gnai1	14677	Lamc1	226519	31	0.519
Npr3	18162	Thbs2	21826	31	0.353
D0H4S114	27528	Pdgfra	18595	31.1	0.434
Fbln2	14115	Rcn3	52377	31.1	0.422
Lum	17022	Thbs2	21826	31.1	0.469
Ptgis	19223	Scara3	219151	31.1	0.376
Ak3	56248	Dock1	330662	31.2	0.573
Col3a1	12825	Smoc2	64074	31.2	0.432
Gpx8	69590	Nid1	18073	31.2	0.447
Gucy1a3	60596	Sparcl1	13602	31.2	0.473
Id4	15904	Ptprd	19266	31.2	0.443
Islr	26968	Nid2	18074	31.2	0.434
Lpar1	14745	Prrx1	18933	31.2	0.424
Bex1	19716	Nid2	18074	31.3	0.385
Col5a2	12832	Rcn3	52377	31.3	0.492
Copz2	56358	Lum	17022	31.3	0.431
Leprel2	14789	Mfap4	76293	31.3	0.448
Loxl2	94352	Nid1	18073	31.3	0.435
Aebp1	11568	Lox	16948	31.4	0.439
Armcx2	67416	Leprel4	66180	31.4	0.427
Caprin1	53872	Grb10	14783	31.4	0.583
Ccdc80	67896	Mxra8	74761	31.4	0.459
Cnot2	72068	Slit2	20563	31.4	0.623
Col1a1	12842	Lama2	16773	31.4	0.49
Col1a2	12843	Pdgfra	18595	31.4	0.489
Fbn1	14118	Gnb4	14696	31.4	0.374
Mmp14	17387	Nid1	18073	31.4	0.431
Mtdh	67154	Slit2	20563	31.4	0.632
Tfpi	21788	Thbd	21824	31.4	0.367
Tgfb1i1	21804	Ttc28	209683	31.4	0.413
Cnn2	12798	Rab34	19376	31.5	0.425
Col1a2	12843	Tpm2	22004	31.5	0.533
Dcn	13179	Pdgfra	18595	31.5	0.466
Fmod	14264	Islr	26968	31.5	0.424
Fstl1	14314	Timp3	21859	31.5	0.448
Fzd2	57265	Mrc2	17534	31.5	0.422
Lama4	16775	Lum	17022	31.5	0.515
Adamts5	23794	Wisp1	22402	31.6	0.35
Aebp1	11568	Fbn1	14118	31.6	0.467
Ccnd2	12444	Rcn3	52377	31.6	0.398
Col3a1	12825	Scara3	219151	31.6	0.463
Col6a2	12834	Tagln	21345	31.6	0.501
Gas1	14451	Loxl1	16949	31.6	0.448
Gpm6b	14758	Jam3	83964	31.6	0.38
Armcx1	78248	Tspan6	56496	31.8	0.403
Bex2	12069	Wbp5	22381	31.8	0.391
Cav1	12389	Loxl1	16949	31.8	0.454
Cdkn1c	12577	Fstl1	14314	31.8	0.422
Col3a1	12825	Synpo	104027	31.8	0.489
Dpt	56429	Itih5	209378	31.8	0.345
Leprel4	66180	Nid2	18074	31.8	0.395
Maged1	94275	Pxdn	69675	31.8	0.392
Meg3	17263	Scg2	20254	31.8	0.427
Ogn	18295	Timp3	21859	31.8	0.448
Ptbp2	56195	Son	20658	31.8	0.573
Vim	22352	Wbp5	22381	31.8	0.44
Fbln2	14115	Leprel4	66180	31.9	0.398
Gucy1b3	54195	Reck	53614	31.9	0.431
Prrx1	18933	Tgfb2	21808	31.9	0.404
Ccdc80	67896	Dab2	13132	32	0.44
Cdh11	12552	Wisp1	22402	32	0.439
Col1a1	12842	Pdlim3	53318	32	0.485
Col5a2	12832	Tgfb3	21809	32	0.435
Gprasp2	245607	Hdgfrp3	29877	32	0.366
Gpx7	67305	Mgp	17313	32	0.391
Tpm1	22003	Tpm2	22004	32	0.584
Ahcyl1	229709	Ctnnb1	12387	32.2	0.66
Akap9	100986	Sbno1	243272	32.2	0.533
Epb4.1l2	13822	Grb10	14783	32.2	0.57
Gpc6	23888	Prrx1	18933	32.2	0.424
Htra1	56213	Pcolce	18542	32.2	0.357
Id4	15904	Klhl13	67455	32.2	0.388
Klc1	16593	Sel1l	20338	32.2	0.618
Antxr1	69538	Scara3	219151	32.3	0.453
Col1a1	12842	Col4a1	12826	32.3	0.446
Col4a1	12826	Mmp14	17387	32.4	0.404
Mmp23	26561	Mxra8	74761	32.4	0.4
Sgce	20392	Tspan6	56496	32.4	0.392
Ahcyl1	229709	Gdi2	14569	32.5	0.664
Antxr1	69538	Gpc6	23888	32.5	0.443
Ccdc80	67896	Mmp2	17390	32.5	0.466
Col1a2	12843	Fkbp9	27055	32.5	0.452
Dlk1	13386	Nrk	27206	32.5	0.34
Fam114a1	68303	Loxl1	16949	32.5	0.452
Fbxw11	103583	Rab18	19330	32.5	0.669
Leprel4	66180	Tspan6	56496	32.5	0.396
Rhobtb3	73296	Zfp644	52397	32.5	0.494
Add3	27360	Efemp2	58859	32.6	0.594
Aebp1	11568	Islr	26968	32.6	0.453
Arhgef25	52666	Nid2	18074	32.6	0.45
Armcx2	67416	Nid2	18074	32.6	0.418
Gulp1	70676	Hdgfrp3	29877	32.6	0.381
Slit2	20563	Tbc1d12	209478	32.6	0.576
Cdh11	12552	S1pr3	13610	32.7	0.409
Cmtm3	68119	Efemp2	58859	32.7	0.498
Lox	16948	Prrx1	18933	32.8	0.446
Acta2	11475	Actc1	11464	32.9	0.472
Ahcyl1	229709	Twsg1	65960	32.9	0.635
Armcx2	67416	Meg3	17263	32.9	0.462
Armcx2	67416	Stmn2	20257	32.9	0.436
Bex1	19716	Ltbp4	108075	32.9	0.401
Bgn	12111	Fkbp10	14230	32.9	0.492
Ccdc80	67896	Tagln	21345	32.9	0.458
Col5a2	12832	Eln	13717	32.9	0.458
Gprasp1	67298	Tmed3	66111	32.9	0.394
Lox	16948	Mmp14	17387	32.9	0.429
Loxl2	94352	Tnc	21923	32.9	0.388
Peg3	18616	Zfp644	52397	32.9	0.532
Ahi1	52906	Gprasp2	245607	33	0.413
Apoe	11816	Ltbp4	108075	33	0.413
Cmtm3	68119	Leprel2	14789	33	0.425
Epb4.1l2	13822	Son	20658	33	0.626
Itgav	16410	Kcnq1ot1	63830	33	0.595
Cpxm1	56264	Mmp2	17390	33.1	0.359
Pxdn	69675	Vasn	246154	33.1	0.379
Armcx1	78248	Itm2a	16431	33.2	0.382
Bgn	12111	Ccdc80	67896	33.2	0.475
Capn6	12338	D0H4S114	27528	33.2	0.355
Ccdc80	67896	Scara3	219151	33.2	0.43
Ccdc80	67896	Tnc	21923	33.2	0.42
Col14a1	12818	Fbn1	14118	33.2	0.473
Col16a1	107581	Postn	50706	33.2	0.432
Col1a2	12843	Prrx1	18933	33.2	0.465
Col4a1	12826	Pdgfra	18595	33.2	0.425
Dlx5	13395	Tmem130	243339	33.2	0.388
Lox	16948	Loxl2	94352	33.2	0.431
Mmp14	17387	Mxra8	74761	33.2	0.425
Antxr1	69538	Mmp2	17390	33.3	0.477
Cd82	12521	Itsn1	16443	33.3	0.515
Lamc1	226519	Rev3l	19714	33.4	0.569
Adamts2	216725	Bgn	12111	33.5	0.45
Axl	26362	Serpinh1	12406	33.5	0.392
Col4a1	12826	Ramp2	54409	33.5	0.414
Dpt	56429	Mfap4	76293	33.5	0.45
Ahcyl1	229709	Epb4.1l2	13822	33.6	0.641
Aspn	66695	Pdlim3	53318	33.6	0.433
Cald1	109624	Mmp14	17387	33.6	0.448
Dcn	13179	Pdlim3	53318	33.6	0.459
Gpx7	67305	Loxl1	16949	33.6	0.402
Jam3	83964	Sgce	20392	33.6	0.371
D0H4S114	27528	Gas1	14451	33.7	0.424
Gpx8	69590	Sparc	20692	33.7	0.443
Acta2	11475	Tnc	21923	33.8	0.417
Dock1	330662	Egfr	13649	33.8	0.581
Lox	16948	Postn	50706	33.8	0.46
Acta2	11475	Lhfp	108927	33.9	0.442
Adamts5	23794	Col1a2	12843	33.9	0.373
Cav1	12389	Lox	16948	33.9	0.441
Ccdc80	67896	Gpx8	69590	33.9	0.448
Gng2	14702	Stmn2	20257	33.9	0.407
Gucy1b3	54195	Tgfb1i1	21804	33.9	0.482
Islr	26968	Sparcl1	13602	33.9	0.492
Mdk	17242	Tcf21	21412	33.9	0.422
Cd81	12520	Klhl13	67455	34	0.37
Col6a1	12833	Matn2	17181	34	0.486
Mdk	17242	Rbp1	19659	34	0.382
Bex1	19716	Phlda2	22113	34.1	0.383
Cmtm3	68119	Mmp14	17387	34.1	0.414
Mmp2	17390	Mxra8	74761	34.1	0.453
Acta2	11475	Mgp	17313	34.2	0.449
Cdh11	12552	Nr2f1	13865	34.2	0.421
Dlk1	13386	Loxl1	16949	34.2	0.426
Dnm1l	74006	Gja1	14609	34.2	0.607
Fam114a1	68303	Tmed3	66111	34.2	0.416
Fzd2	57265	Gjc1	14615	34.2	0.409
Gng2	14702	Pja2	224938	34.2	0.443
Gpx8	69590	Mrc2	17534	34.2	0.449
Add3	27360	Nrxn3	18191	34.3	0.597
Cdkn1c	12577	Ndn	17984	34.3	0.491
Fam114a1	68303	Tgfb1i1	21804	34.3	0.45
Copz2	56358	Mmp2	17390	34.4	0.419
Add3	27360	Spnb2	20742	34.5	0.555
Cacna2d1	12293	Rev3l	19714	34.5	0.497
Col1a1	12842	Mgp	17313	34.5	0.466
Dach1	13134	Npr3	18162	34.5	0.358
Dlk1	13386	Rcn3	52377	34.5	0.419
Efemp1	216616	Scara3	219151	34.5	0.374
Gpx8	69590	Lhfp	108927	34.5	0.426
Lasp1	16796	Rpn1	103963	34.5	0.635
Apoe	11816	Lyz2	17105	34.6	0.439
Aspn	66695	Sparcl1	13602	34.6	0.457
Bgn	12111	Dpt	56429	34.6	0.472
Cald1	109624	Lrp1	16971	34.6	0.439
Cav1	12389	Timp3	21859	34.6	0.432
Ckap4	216197	Fkbp10	14230	34.6	0.408
Ctsh	13036	Serping1	12258	34.6	0.458
Fbn2	14119	Mageh1	75625	34.6	0.385
Fbn2	14119	Nnat	18111	34.6	0.378
Igfbp3	16009	Sox18	20672	34.6	0.427
Meis2	17536	Nr2f2	11819	34.6	0.412
Pcolce	18542	Wisp1	22402	34.6	0.419
Peg13	353342	Tspan32	27027	34.6	0.476
Airn	104103	Map4k3	225028	34.8	0.383
Col4a1	12826	Ppic	19038	34.8	0.371
Id4	15904	Mdk	17242	34.8	0.375
Col3a1	12825	Prrx1	18933	34.9	0.484
Col5a1	12831	Fstl1	14314	34.9	0.457
Col6a1	12833	Nid1	18073	34.9	0.471
Nid1	18073	S1pr3	13610	34.9	0.405
Pea15a	18611	Vim	22352	34.9	0.393
Sfrp1	20377	Sparcl1	13602	34.9	0.407
Aplp1	11803	Klhl13	67455	35	0.418
Ccdc80	67896	Nid1	18073	35	0.461
Cdkn1c	12577	Leprel4	66180	35	0.384
Col6a1	12833	Dlk1	13386	35	0.431
Col6a2	12834	Fkbp10	14230	35	0.503
Col6a2	12834	Smoc2	64074	35.1	0.411
Igdcc4	56741	Itm2a	16431	35.1	0.405
Nbea	26422	Tspan6	56496	35.1	0.378
Bgn	12111	Lama2	16773	35.2	0.479
Col1a2	12843	Mfap4	76293	35.2	0.475
Fbn1	14118	Leprel2	14789	35.2	0.471
Fstl1	14314	Sfrp1	20377	35.2	0.402
6330403K07Rik	103712	Meis2	17536	35.3	0.417
Armcx2	67416	Clip3	76686	35.3	0.4
Cmtm3	68119	Col1a1	12842	35.3	0.445
Cmtm3	68119	Col3a1	12825	35.3	0.46
Col1a2	12843	Tnc	21923	35.3	0.43
Dpt	56429	Mgp	17313	35.3	0.439
Fbn2	14119	Pxdn	69675	35.3	0.397
Gpx7	67305	Ppic	19038	35.3	0.364
Lpar1	14745	Sdc2	15529	35.3	0.396
Cacna2d1	12293	Mpdz	17475	35.4	0.436
Capn6	12338	Tnni1	21952	35.4	0.323
Cpxm1	56264	Rcn3	52377	35.4	0.355
6330403K07Rik	103712	Dlk1	13386	35.5	0.394
Cdkn1c	12577	Timp3	21859	35.5	0.402
Islr	26968	Rcn3	52377	35.6	0.47
Aspn	66695	Col3a1	12825	35.7	0.478
Cdh11	12552	Col1a1	12842	35.7	0.497
Ctsz	64138	Selm	114679	35.7	0.385
Elavl2	15569	Rit2	19762	35.7	0.568
Hap1	15114	Th	21823	35.7	0.319
Ndn	17984	Ndrg4	234593	35.7	0.447
Nrk	27206	Zim1	22776	35.7	0.254
Tcf21	21412	Timp3	21859	35.7	0.447
Akap9	100986	Mtap1b	17755	35.8	0.458
Cdkn1c	12577	Col1a2	12843	35.8	0.428
Col1a1	12842	Tpm2	22004	35.8	0.527
Armcx1	78248	D0H4S114	27528	35.9	0.406
Cdkn1c	12577	Col3a1	12825	35.9	0.44
Col3a1	12825	Tcf21	21412	35.9	0.507
Fbn1	14118	Tgfb1i1	21804	35.9	0.493
Fstl1	14314	Igdcc4	56741	35.9	0.453
Igf2	16002	Mdk	17242	35.9	0.405
Lamc1	226519	Rhobtb3	73296	35.9	0.478
Tgfb2	21808	Wisp1	22402	35.9	0.384
Acta2	11475	Cav1	12389	36	0.445
Mmp2	17390	Ppic	19038	36	0.397
Ogn	18295	Smoc2	64074	36	0.391
Ptn	19242	Vasn	246154	36	0.377
Tgfb2	21808	Ttc28	209683	36	0.38
Ckap4	216197	Mmp14	17387	36.1	0.387
Clip3	76686	Tro	56191	36.1	0.359
Col1a2	12843	Thbs2	21826	36.1	0.469
Dlk1	13386	Nnat	18111	36.1	0.377
Lasp1	16796	Nrxn3	18191	36.1	0.628
Copz2	56358	Loxl1	16949	36.2	0.421
Gap43	14432	Plagl1	22634	36.2	0.367
Gpc3	14734	Tcf21	21412	36.2	0.413
Lyz2	17105	Tgfbi	21810	36.2	0.445
Agtr2	11609	Col3a1	12825	36.3	0.349
Aplp2	11804	Son	20658	36.3	0.592
Cdkn1c	12577	D0H4S114	27528	36.3	0.385
Col6a2	12834	Sparc	20692	36.3	0.482
Dock1	330662	Rhobtb3	73296	36.3	0.499
Fbn2	14119	Ttc28	209683	36.3	0.382
Aebp1	11568	Col5a2	12832	36.4	0.453
Aspn	66695	Mmp2	17390	36.4	0.431
Axl	26362	Pcolce	18542	36.4	0.387
Cdh5	12562	Col4a1	12826	36.4	0.435
Eln	13717	Thbd	21824	36.4	0.377
Lum	17022	Matn2	17181	36.4	0.481
Col6a1	12833	Wisp1	22402	36.5	0.43
Sel1l	20338	Ywhag	22628	36.5	0.633
Clip3	76686	Ndrg4	234593	36.6	0.36
Col6a2	12834	Mmp23	26561	36.6	0.413
Pon3	269823	Tmed3	66111	36.6	0.359
Rev3l	19714	Zfp644	52397	36.6	0.562
Aplp1	11803	Syt11	229521	36.7	0.391
Bgn	12111	Igfbp3	16009	36.7	0.433
Cnn2	12798	Rcn3	52377	36.7	0.43
Col16a1	107581	Col1a1	12842	36.7	0.45
Col1a2	12843	Leprel4	66180	36.7	0.44
Gprasp1	67298	Ppp1r9a	243725	36.7	0.367
Serpinf1	20317	Slc38a4	69354	36.7	0.329
Armcx2	67416	Sfrp2	20319	36.8	0.384
D0H4S114	27528	Mfap4	76293	36.8	0.424
Igf2r	16004	Spnb2	20742	36.8	0.48
Nbea	26422	Zfp521	225207	36.8	0.42
Armcx1	78248	Reck	53614	36.9	0.393
Bex2	12069	Ppp1r9a	243725	36.9	0.357
Cav1	12389	Sparcl1	13602	36.9	0.461
Ctnnb1	12387	Twsg1	65960	36.9	0.637
H19	14955	Ppic	19038	36.9	0.341
Nr2f2	11819	Sparc	20692	36.9	0.421
Pdlim7	67399	Tpm2	22004	36.9	0.466
Actc1	11464	Tpm1	22003	37	0.531
Dlk1	13386	Postn	50706	37	0.421
Fbln2	14115	Loxl2	94352	37	0.397
Fbn1	14118	Tpm2	22004	37	0.529
Hdgfrp3	29877	Reck	53614	37	0.37
Lhfp	108927	Parva	57342	37	0.403
Pon2	330260	Rnase4	58809	37	0.389
Ahcyl1	229709	Son	20658	37.1	0.626
Col14a1	12818	Lama2	16773	37.1	0.449
Col5a2	12832	Matn2	17181	37.1	0.494
Ctnnb1	12387	Dnm1l	74006	37.1	0.648
Fkbp10	14230	Mxra8	74761	37.1	0.459
Gucy1b3	54195	Tcf21	21412	37.1	0.475
Ppp1r9a	243725	Ptprd	19266	37.1	0.422
Cntn1	12805	Syt1	20979	37.2	0.413
Armcx2	67416	Ndrg4	234593	37.3	0.383
Loxl1	16949	Tgfb1i1	21804	37.4	0.473
Aplp2	11804	Il6st	16195	37.5	0.557
Col1a1	12842	Tgfb3	21809	37.5	0.428
Col3a1	12825	Mmp23	26561	37.5	0.421
Col6a2	12834	Matn2	17181	37.5	0.496
D0H4S114	27528	Pxdn	69675	37.5	0.401
Fbn2	14119	Tspan6	56496	37.5	0.388
Fzd2	57265	Gas1	14451	37.5	0.406
Gnb4	14696	Plagl1	22634	37.5	0.34
Hipk2	15258	Sel1l	20338	37.5	0.487
Ltbp4	108075	Mxra8	74761	37.5	0.421
Meg3	17263	Slc22a17	59049	37.5	0.418
Gjc1	14615	Sox11	20666	37.6	0.402
Gas1	14451	Igdcc4	56741	37.7	0.439
Gpx8	69590	Pcolce	18542	37.7	0.426
Pdgfra	18595	Plagl1	22634	37.7	0.399
Ccdc80	67896	Igf2	16002	37.8	0.446
Col1a2	12843	Gpx7	67305	37.8	0.404
Elavl3	15571	Syt11	229521	37.8	0.387
Gnai1	14677	Lama4	16775	37.8	0.51
Lum	17022	Pdlim3	53318	37.8	0.461
Mdk	17242	Rcn3	52377	37.8	0.407
Nid2	18074	Postn	50706	37.8	0.413
Timp3	21859	Tspan7	21912	37.8	0.444
2310035C23Rik	227446	Cd47	16423	38	0.531
Axl	26362	Col1a2	12843	38	0.397
Col5a1	12831	Mfap4	76293	38	0.446
[truncated: 12,260 more rows]
