# Supplementary material for: A systems-level approach to parental genomic imprinting: the imprinted gene network includes extracellular matrix genes and regulates cell cycle exit and differentiation
Source: HighWire-hosted journal article supplement (doi:10.1101/gr.175919.114), 2015-01-22
Supplement: Table_S11.xlsx [file Table_S11.xlsx]

## Sheet: DAVID enrichment tools
Category	Term	Count	%	PValue	GeneIDs	Symbols	List Total	Pop Hits	Pop Total	Fold Enrichment	Bonferroni	Benjamini	FDR
GOTERM_BP_FAT	GO:0030198~extracellular matrix organization	20	4.88998	9.49061e-12	50706, 11803, 12831, 12832, 64074, 11804, 67896, 12825, 21808, 16948, 216725, 53614, 18595, 21810, 14114, 18073, 226519, 12406, 13717, 56429	Postn,Aplp1,Col5a1,Col5a2,Smoc2,Aplp2,Ccdc80,Col3a1,Tgfb2,Lox,Adamts2,Reck,Pdgfra,Tgfbi,Fbln1,Nid1,Lamc1,Serpinh1,Eln,Dpt	306	96	11160	7.59804	1.60866e-08	8.04331e-09	1.60021e-08
	GO:0043062~extracellular structure organization	24	5.86797	4.81287e-12	50706, 11803, 12831, 12832, 64074, 12387, 11804, 67896, 21923, 12825, 21808, 16948, 216725, 53614, 18191, 22288, 18595, 21810, 14114, 18073, 226519, 12406, 13717, 56429	Postn,Aplp1,Col5a1,Col5a2,Smoc2,Ctnnb1,Aplp2,Ccdc80,Tnc,Col3a1,Tgfb2,Lox,Adamts2,Reck,Nrxn3,Utrn,Pdgfra,Tgfbi,Fbln1,Nid1,Lamc1,Serpinh1,Eln,Dpt	306	142	11160	6.16404	8.15772e-09	8.15772e-09	8.11485e-09
	GO:0001944~vasculature development	29	7.09046	1.65807e-10	12831, 16775, 59308, 11816, 18933, 21412, 21808, 21814, 17387, 17268, 12562, 20672, 18741, 14615, 20254, 12842, 12389, 12387, 12825, 16948, 67916, 53614, 14609, 13360, 18212, 16410, 22431, 17390, 11819	Col5a1,Lama4,Emcn,Apoe,Prrx1,Tcf21,Tgfb2,Tgfbr3,Mmp14,Meis1,Cdh5,Sox18,Pitx2,Gjc1,Scg2,Col1a1,Cav1,Ctnnb1,Col3a1,Lox,Ppap2b,Reck,Gja1,Dhcr7,Ntrk2,Itgav,Wt1,Mmp2,Nr2f2	306	248	11160	4.26471	2.81043e-07	9.36808e-08	2.79566e-07
	GO:0001568~blood vessel development	28	6.84597	4.66865e-10	12831, 16775, 59308, 11816, 18933, 21808, 21814, 17387, 17268, 12562, 20672, 18741, 14615, 20254, 12842, 12389, 12387, 12825, 16948, 67916, 53614, 14609, 13360, 18212, 16410, 22431, 17390, 11819	Col5a1,Lama4,Emcn,Apoe,Prrx1,Tgfb2,Tgfbr3,Mmp14,Meis1,Cdh5,Sox18,Pitx2,Gjc1,Scg2,Col1a1,Cav1,Ctnnb1,Col3a1,Lox,Ppap2b,Reck,Gja1,Dhcr7,Ntrk2,Itgav,Wt1,Mmp2,Nr2f2	306	242	11160	4.21974	7.91335e-07	1.97834e-07	7.87177e-07
	GO:0022610~biological adhesion	41	10.0244	1.70975e-09	56191, 50706, 16775, 22402, 12831, 17311, 12833, 69524, 59308, 19268, 16423, 21808, 18488, 12834, 12818, 18074, 21810, 18073, 226519, 83964, 12490, 12491, 57342, 12562, 16773, 56264, 11803, 21687, 69538, 12805, 17475, 12387, 12386, 21923, 11568, 76293, 21826, 107581, 16410, 56429, 12552	Tro,Postn,Lama4,Wisp1,Col5a1,Kitl,Col6a1,Esam,Emcn,Ptprf,Cd47,Tgfb2,Cntn3,Col6a2,Col14a1,Nid2,Tgfbi,Nid1,Lamc1,Jam3,Cd34,Cd36,Parva,Cdh5,Lama2,Cpxm1,Aplp1,Tek,Antxr1,Cntn1,Mpdz,Ctnnb1,Ctnna2,Tnc,Aebp1,Mfap4,Thbs2,Col16a1,Itgav,Dpt,Cdh11	306	513	11160	2.9148	2.89802e-06	4.83005e-07	2.8828e-06
	GO:0007155~cell adhesion	41	10.0244	1.61961e-09	56191, 50706, 16775, 22402, 12831, 17311, 12833, 69524, 59308, 19268, 16423, 21808, 18488, 12834, 12818, 18074, 21810, 18073, 226519, 83964, 12490, 12491, 57342, 12562, 16773, 56264, 11803, 21687, 69538, 12805, 17475, 12387, 12386, 21923, 11568, 76293, 21826, 107581, 16410, 56429, 12552	Tro,Postn,Lama4,Wisp1,Col5a1,Kitl,Col6a1,Esam,Emcn,Ptprf,Cd47,Tgfb2,Cntn3,Col6a2,Col14a1,Nid2,Tgfbi,Nid1,Lamc1,Jam3,Cd34,Cd36,Parva,Cdh5,Lama2,Cpxm1,Aplp1,Tek,Antxr1,Cntn1,Mpdz,Ctnnb1,Ctnna2,Tnc,Aebp1,Mfap4,Thbs2,Col16a1,Itgav,Dpt,Cdh11	306	512	11160	2.9205	2.74524e-06	5.49049e-07	2.73082e-06
	GO:0014706~striated muscle tissue development	15	3.66748	7.00853e-06	21952, 12389, 53318, 21923, 21808, 227325, 22288, 21814, 11464, 22003, 13717, 18741, 13405, 11819, 14615	Tnni1,Cav1,Pdlim3,Tnc,Tgfb2,Dner,Utrn,Tgfbr3,Actc1,Tpm1,Eln,Pitx2,Dmd,Nr2f2,Gjc1	306	124	11160	4.41176	0.0118092	0.00169563	0.0118164
	GO:0030199~collagen fibril organization	7	1.71149	1.11263e-05	12831, 12832, 12406, 12825, 216725, 16948, 56429	Col5a1,Col5a2,Serpinh1,Col3a1,Adamts2,Lox,Dpt	306	20	11160	12.7647	0.0186825	0.00235463	0.0187584
	GO:0060537~muscle tissue development	15	3.66748	1.58121e-05	21952, 12389, 53318, 21923, 21808, 227325, 22288, 21814, 11464, 22003, 13717, 18741, 13405, 11819, 14615	Tnni1,Cav1,Pdlim3,Tnc,Tgfb2,Dner,Utrn,Tgfbr3,Actc1,Tpm1,Eln,Pitx2,Dmd,Nr2f2,Gjc1	306	133	11160	4.11322	0.0264458	0.00297355	0.0266574
	GO:0007517~muscle organ development	17	4.15648	1.90706e-05	21952, 12389, 11906, 53318, 21923, 21808, 22288, 227325, 21814, 11464, 22003, 13717, 18741, 21345, 13405, 11819, 14615	Tnni1,Cav1,Zfhx3,Pdlim3,Tnc,Tgfb2,Utrn,Dner,Tgfbr3,Actc1,Tpm1,Eln,Pitx2,Tagln,Dmd,Nr2f2,Gjc1	306	172	11160	3.60465	0.031808	0.00322727	0.0321499
	GO:0048514~blood vessel morphogenesis	17	4.15648	9.3209e-05	20254, 12389, 59308, 11816, 12387, 18933, 21808, 14609, 18212, 16410, 17387, 22431, 17268, 20672, 18741, 11819, 14615	Scg2,Cav1,Emcn,Apoe,Ctnnb1,Prrx1,Tgfb2,Gja1,Ntrk2,Itgav,Mmp14,Wt1,Meis1,Sox18,Pitx2,Nr2f2,Gjc1	306	196	11160	3.16327	0.146147	0.0142607	0.157043
	GO:0001503~ossification	11	2.68949	0.000335168	16009, 67399, 65960, 17313, 12842, 17387, 19242, 16011, 16002, 17390, 14683	Igfbp3,Pdlim7,Twsg1,Mgp,Col1a1,Mmp14,Ptn,Igfbp5,Igf2,Mmp2,Gnas	306	98	11160	4.09364	0.433458	0.0462468	0.563624
	GO:0010647~positive regulation of cell communication	15	3.66748	0.000395737	65960, 17311, 22215, 12387, 18933, 21809, 14451, 15258, 16443, 18212, 13488, 14734, 14745, 22637, 16773	Twsg1,Kitl,Ube3a,Ctnnb1,Prrx1,Tgfb3,Gas1,Hipk2,Itsn1 ,Ntrk2,Drd1a,Gpc3,Lpar1,Zap70,Lama2	306	179	11160	3.05619	0.488755	0.0467918	0.665159
	GO:0001501~skeletal system development	19	4.64548	0.000369297	16009, 67399, 17313, 65960, 12832, 12842, 12387, 19242, 16011, 18933, 21808, 21809, 14451, 13386, 18595, 17387, 16002, 17390, 14683	Igfbp3,Pdlim7,Mgp,Twsg1,Col5a2,Col1a1,Ctnnb1,Ptn,Igfbp5,Prrx1,Tgfb2,Tgfb3,Gas1,Dlk1,Pdgfra,Mmp14,Igf2,Mmp2,Gnas	306	266	11160	2.60504	0.465313	0.0470183	0.620849
GOTERM_CC_FAT	GO:0005578~proteinaceous extracellular matrix	51	12.4694	2.46705e-26	50706, 12111, 19242, 216725, 12818, 17387, 23794, 13717, 21923, 12825, 12826, 18295, 17022, 26561, 23888, 17390, 58859, 16775, 12831, 12832, 12833, 64074, 13602, 17150, 12834, 18074, 14114, 21810, 14115, 18073, 226519, 14734, 14118, 21814, 14119, 20692, 16773, 12843, 108075, 66695, 14264, 12842, 13179, 67896, 16949, 16948, 21859, 76293, 17181, 107581, 56429	Postn,Bgn,Ptn,Adamts2,Col14a1,Mmp14,Adamts5,Eln,Tnc,Col3a1,Col4a1,Ogn,Lum,Mmp23,Gpc6,Mmp2,Efemp2,Lama4,Col5a1,Col5a2,Col6a1,Smoc2,Sparcl1,Mfap2,Col6a2,Nid2,Fbln1,Tgfbi,Fbln2,Nid1,Lamc1,Gpc3,Fbn1,Tgfbr3,Fbn2,Sparc,Lama2,Col1a2,Ltbp4,Aspn,Fmod,Col1a1,Dcn,Ccdc80,Loxl1,Lox,Timp3,Mfap4,Matn2,Col16a1,Dpt	297	279	10299	6.33876	6.66105e-24	3.33052e-24	3.24372e-23
	GO:0031012~extracellular matrix	52	12.7139	1.85782e-26	50706, 12111, 19242, 216725, 12818, 17387, 23794, 13717, 21923, 12825, 12826, 18295, 17022, 26561, 23888, 17390, 58859, 16775, 12831, 12832, 12833, 64074, 13602, 17150, 21809, 12834, 18074, 14114, 21810, 14115, 18073, 226519, 14734, 14118, 21814, 14119, 20692, 16773, 12843, 108075, 66695, 14264, 12842, 13179, 67896, 16949, 16948, 21859, 76293, 17181, 107581, 56429	Postn,Bgn,Ptn,Adamts2,Col14a1,Mmp14,Adamts5,Eln,Tnc,Col3a1,Col4a1,Ogn,Lum,Mmp23,Gpc6,Mmp2,Efemp2,Lama4,Col5a1,Col5a2,Col6a1,Smoc2,Sparcl1,Mfap2,Tgfb3,Col6a2,Nid2,Fbln1,Tgfbi,Fbln2,Nid1,Lamc1,Gpc3,Fbn1,Tgfbr3,Fbn2,Sparc,Lama2,Col1a2,Ltbp4,Aspn,Fmod,Col1a1,Dcn,Ccdc80,Loxl1,Lox,Timp3,Mfap4,Matn2,Col16a1,Dpt	297	290	10299	6.2179	5.01611e-24	5.01611e-24	2.44269e-23
	GO:0044421~extracellular region part	71	17.3594	2.19502e-21	50706, 17313, 65960, 17311, 12111, 12258, 19242, 216725, 12818, 17387, 23794, 13717, 16009, 56264, 16008, 21923, 12825, 12826, 18295, 17022, 26561, 21824, 68119, 16002, 23888, 17390, 58859, 12831, 16775, 12832, 12833, 64074, 11816, 20720, 13602, 21808, 17150, 21809, 12834, 18074, 21810, 14114, 14115, 18073, 226519, 21814, 14734, 14118, 14119, 20692, 94352, 16773, 108075, 12843, 20254, 14264, 6669…	Postn,Mgp,Twsg1,Kitl,Bgn,Serping1,Ptn,Adamts2,Col14a1,Mmp14,Adamts5,Eln,Igfbp3,Cpxm1,Igfbp2,Tnc,Col3a1,Col4a1,Ogn,Lum,Mmp23,Thbd,Cmtm3,Igf2,Gpc6,Mmp2,Efemp2,Col5a1,Lama4,Col5a2,Col6a1,Smoc2,Apoe,Serpine2,Sparcl1,Tgfb2,Mfap2,Tgfb3,Col6a2,Nid2,Tgfbi,Fbln1,Fbln2,Nid1,Lamc1,Tgfbr3,Gpc3,Fbn1,Fbn2,Sparc,Loxl2,Lama2,Ltbp4,Col1a2,Scg2,Fmod,Aspn,Col1a1,Slit2,Igfbp5,Dcn,Ccdc80,Loxl1,Lox,Timp3,Pon3,Mfap4,Ma…	297	694	10299	3.54762	5.92656e-19	1.97552e-19	2.88605e-18
	GO:0005576~extracellular region	99	24.2054	4.68746e-17	50706, 17313, 11875, 17311, 12111, 18542, 216725, 17387, 23794, 13717, 16009, 16008, 69675, 18295, 20377, 17022, 26561, 21826, 21824, 16334, 16002, 330260, 17390, 22402, 58809, 64074, 13602, 21789, 21788, 17150, 21808, 21809, 18074, 21810, 18073, 14734, 21814, 20254, 20563, 216616, 13179, 56213, 16949, 16948, 269823, 107581, 56429, 65960, 12259, 12258, 19242, 19241, 12818, 20287, 17242, 56264, 21…	Postn,Mgp,Art5,Kitl,Bgn,Pcolce,Adamts2,Mmp14,Adamts5,Eln,Igfbp3,Igfbp2,Pxdn,Ogn,Sfrp1,Lum,Mmp23,Thbs2,Thbd,Ins2,Igf2,Pon2,Mmp2,Wisp1,Rnase4,Smoc2,Sparcl1,Tfpi2,Tfpi,Mfap2,Tgfb2,Tgfb3,Nid2,Tgfbi,Nid1,Gpc3,Tgfbr3,Scg2,Slit2,Efemp1,Dcn,Htra1,Loxl1,Lox,Pon3,Col16a1,Dpt,Twsg1,C1qa,Serping1,Ptn,Tmsb4x,Col14a1,Sct,Mdk,Cpxm1,Tnc,Col3a1,Col4a1,Resp18,Aebp1,Cmtm3,Gpx7,C1qb,Gpc6,Efemp2,C1qc,Col5a1,Lama4,Col…	297	1470	10299	2.33537	1.26561e-14	3.16403e-15	6.16314e-14
	GO:0044420~extracellular matrix part	21	5.13447	2.58192e-13	12843, 16775, 12831, 12832, 12842, 64074, 67896, 21923, 12825, 12826, 17150, 16948, 21859, 18074, 14114, 18073, 226519, 14118, 14119, 20692, 16773	Col1a2,Lama4,Col5a1,Col5a2,Col1a1,Smoc2,Ccdc80,Tnc,Col3a1,Col4a1,Mfap2,Lox,Timp3,Nid2,Fbln1,Nid1,Lamc1,Fbn1,Fbn2,Sparc,Lama2	297	86	10299	8.46758	6.97242e-11	1.39448e-11	3.3954e-10
	GO:0005604~basement membrane	13	3.17848	4.38933e-07	12831, 16775, 64074, 21923, 67896, 12826, 21859, 18074, 14114, 18073, 226519, 20692, 16773	Col5a1,Lama4,Smoc2,Tnc,Ccdc80,Col4a1,Timp3,Nid2,Fbln1,Nid1,Lamc1,Sparc,Lama2	297	68	10299	6.62938	0.000118505	1.97518e-05	0.000577114
	GO:0015629~actin cytoskeleton	20	4.88998	2.99729e-06	19882, 67399, 20742, 109624, 13800, 65970, 53318, 12386, 20743, 22004, 22288, 13007, 11475, 104027, 18645, 22003, 16796, 13822, 98932, 243725	Mst1r,Pdlim7,Spnb2,Cald1,Enah,Lima1,Pdlim3,Ctnna2,Spnb3,Tpm2,Utrn,Csrp1,Acta2,Synpo,Pfn2,Tpm1,Lasp1,Epb4.1l2,Myl9,Ppp1r9a	297	194	10299	3.57492	0.000808942	0.000115603	0.00394081
	GO:0005581~collagen	7	1.71149	1.05999e-05	12843, 12831, 12832, 12842, 12825, 12826, 16948	Col1a2,Col5a1,Col5a2,Col1a1,Col3a1,Col4a1,Lox	297	19	10299	12.7757	0.00285789	0.000357683	0.013936
	GO:0030864~cortical actin cytoskeleton	6	1.46699	0.000264139	22288, 20742, 109624, 16796, 20743, 243725	Utrn,Spnb2,Cald1,Lasp1,Spnb3,Ppp1r9a	297	21	10299	9.90765	0.0688426	0.00789389	0.346737
	GO:0044459~plasma membrane part	64	15.6479	0.000325247	12293, 27062, 20742, 69524, 26422, 16443, 14432, 12520, 17387, 23965, 57342, 16796, 26362, 22637, 12562, 14615, 14683, 69538, 13800, 27360, 12389, 65970, 12387, 12386, 14924, 13386, 22288, 16535, 56741, 18212, 224938, 23888, 13649, 20518, 20519, 11816, 16423, 54160, 21809, 14451, 229521, 18595, 11518, 16971, 104027, 14734, 12490, 20979, 13405, 13610, 21687, 56358, 20257, 17475, 14696, 66066, 6715…	Cacna2d1,Cadps,Spnb2,Esam,Nbea,Itsn1 ,Gap43,Cd81,Mmp14,Odz3,Parva,Lasp1,Axl,Zap70,Cdh5,Gjc1,Gnas,Antxr1,Enah,Add3,Cav1,Lima1,Ctnnb1,Ctnna2,Magi1,Dlk1,Utrn,Kcnq1,Igdcc4,Ntrk2,Pja2,Gpc6,Egfr,Slc22a2,Slc22a3,Apoe,Cd47,Copg2,Tgfb3,Gas1,Syt11,Pdgfra,Add1,Lrp1,Synpo,Gpc3,Cd34,Syt1,Dmd,S1pr3,Tek,Copz2,Stmn2,Mpdz,Gnb4,Gng11,Mtdh,Il6st,Gja1,Itgav,Tgfb1i1,Sgce,Slc22a18,Gng2	297	1439	10299	1.54226	0.0840843	0.00874463	0.426795
	GO:0044449~contractile fiber part	10	2.44499	0.000658941	22004, 20742, 11475, 12387, 52666, 11464, 22003, 53318, 17390, 13405	Tpm2,Spnb2,Acta2,Ctnnb1,Arhgef25,Actc1,Tpm1,Pdlim3,Mmp2,Dmd	297	84	10299	4.12819	0.163035	0.0160492	0.862926
	GO:0005615~extracellular space	26	6.35697	0.00114051	17313, 65960, 17311, 12258, 11816, 20720, 21808, 21809, 21810, 14734, 94352, 16009, 20254, 56264, 20563, 16008, 16011, 16949, 16948, 269823, 21824, 68119, 16002, 23888, 17390, 20317	Mgp,Twsg1,Kitl,Serping1,Apoe,Serpine2,Tgfb2,Tgfb3,Tgfbi,Gpc3,Loxl2,Igfbp3,Scg2,Cpxm1,Slit2,Igfbp2,Igfbp5,Loxl1,Lox,Pon3,Thbd,Cmtm3,Igf2,Gpc6,Mmp2,Serpinf1	297	448	10299	2.01249	0.265168	0.0253493	1.48921
	GO:0043292~contractile fiber	10	2.44499	0.00127337	22004, 20742, 11475, 12387, 52666, 11464, 22003, 53318, 17390, 13405	Tpm2,Spnb2,Acta2,Ctnnb1,Arhgef25,Actc1,Tpm1,Pdlim3,Mmp2,Dmd	297	92	10299	3.76921	0.291092	0.0261167	1.66136
	GO:0005886~plasma membrane	96	23.4719	0.00150108	12293, 56191, 27062, 20742, 17311, 69524, 59308, 12111, 59049, 26422, 16443, 14432, 17387, 12520, 69354, 94275, 23965, 57342, 16796, 22637, 26362, 12562, 14683, 14615, 69538, 13800, 65970, 12389, 27360, 12387, 14924, 12386, 13386, 22288, 16535, 56741, 13488, 18212, 21824, 224938, 23888, 17390, 12552, 19882, 13649, 20518, 12833, 20519, 11816, 16423, 241070, 18488, 21809, 54160, 229521, 14451, 1283…	Cacna2d1,Tro,Cadps,Spnb2,Kitl,Esam,Emcn,Bgn,Slc22a17,Nbea,Itsn1,Gap43,Mmp14,Cd81,Slc38a4,Maged1,Odz3,Parva,Lasp1,Zap70,Axl,Cdh5,Gnas,Gjc1,Antxr1,Enah,Lima1,Cav1,Add3,Ctnnb1,Magi1,Ctnna2,Dlk1,Utrn,Kcnq1,Igdcc4,Drd1a,Ntrk2,Thbd,Pja2,Gpc6,Mmp2,Cdh11,Mst1r,Egfr,Slc22a2,Col6a1,Slc22a3,Apoe,Cd47,Gpr1,Cntn3,Tgfb3,Copg2,Syt11,Gas1,Col6a2,Pdgfra,Add1,Lrp1,Tgfbr3,Synpo,Jam3,Gpc3,Cd34,Cd36,Adcy7,Syt1,Lama2,…	297	2516	10299	1.32312	0.333421	0.0285555	1.95575
	GO:0030017~sarcomere	9	2.20049	0.00173433	22004, 20742, 12387, 52666, 11464, 22003, 53318, 17390, 13405	Tpm2,Spnb2,Ctnnb1,Arhgef25,Actc1,Tpm1,Pdlim3,Mmp2,Dmd	297	78	10299	4.00117	0.374169	0.0288673	2.25645
	GO:0030054~cell junction	25	6.11247	0.00188664	27062, 69524, 229521, 26422, 16443, 14432, 104027, 57342, 16796, 12562, 20979, 14615, 13405, 13800, 27360, 65970, 17475, 12387, 14924, 12386, 67154, 22288, 14609, 224938, 21804	Cadps,Esam,Syt11,Nbea,Itsn1 ,Gap43,Synpo,Parva,Lasp1,Cdh5,Syt1,Gjc1,Dmd,Enah,Add3,Lima1,Mpdz,Ctnnb1,Magi1,Ctnna2,Mtdh,Utrn,Gja1,Pja2,Tgfb1i1	297	439	10299	1.97476	0.399428	0.0295472	2.45235
	GO:0042383~sarcolemma	7	1.71149	0.00169826	12293, 12833, 12111, 21809, 12834, 16773, 13405	Cacna2d1,Col6a1,Bgn,Tgfb3,Col6a2,Lama2,Dmd	297	45	10299	5.39416	0.368034	0.0301313	2.21
	GO:0005856~cytoskeleton	46	11.2469	0.0030773	19882, 20742, 17311, 53318, 100986, 17150, 19241, 20743, 16905, 11518, 11468, 13007, 104027, 11464, 18645, 57342, 16796, 17984, 13405, 67399, 109624, 13800, 27360, 65970, 16593, 17475, 12387, 18611, 12386, 20259, 238871, 22352, 22288, 22004, 13429, 18212, 11475, 17755, 21804, 224938, 22003, 20392, 110310, 13822, 98932, 243725	Mst1r,Spnb2,Kitl,Pdlim3,Akap9,Mfap2,Tmsb4x,Spnb3,Lmna,Add1,Actg2,Csrp1,Synpo,Actc1,Pfn2,Parva,Lasp1,Ndn,Dmd,Pdlim7,Cald1,Enah,Add3,Lima1,Klc1,Mpdz,Ctnnb1,Pea15a,Ctnna2,Scin,Pde4d,Vim,Utrn,Tpm2,Dnm1,Ntrk2,Acta2,Mtap1b,Tgfb1i1,Pja2,Tpm1,Sgce,Krt7,Epb4.1l2,Myl9,Ppp1r9a	297	1036	10299	1.5397	0.564888	0.0451783	3.97131
GOTERM_MF_FAT	GO:0019838~growth factor binding	17	4.15648	3.61723e-11	108075, 16009, 12843, 12831, 22402, 12833, 12842, 16011, 16008, 12825, 56213, 12826, 18595, 16195, 18212, 21814, 16004	Ltbp4,Igfbp3,Col1a2,Col5a1,Wisp1,Col6a1,Col1a1,Igfbp5,Igfbp2,Col3a1,Htra1,Col4a1,Pdgfra,Il6st,Ntrk2,Tgfbr3,Igf2r	290	71	10854	8.96153	1.44689e-08	1.44689e-08	5.04533e-08
	GO:0048407~platelet-derived growth factor binding	7	1.71149	2.65821e-08	12843, 18595, 12831, 12842, 12833, 12825, 12826	Col1a2,Pdgfra,Col5a1,Col1a1,Col6a1,Col3a1,Col4a1	290	9	10854	29.1103	1.06328e-05	5.31641e-06	3.70769e-05
	GO:0005201~extracellular matrix structural constituent	10	2.44499	5.20068e-08	12843, 12831, 12832, 12842, 226519, 14118, 14119, 12825, 12826, 13717	Col1a2,Col5a1,Col5a2,Col1a1,Lamc1,Fbn1,Fbn2,Col3a1,Col4a1,Eln	290	30	10854	12.4759	2.08025e-05	6.93421e-06	7.25393e-05
	GO:0005509~calcium ion binding	45	11.0024	9.19628e-07	12293, 27062, 17313, 17534, 64074, 14230, 13602, 229521, 18074, 14114, 14115, 16443, 18073, 14118, 16971, 17387, 14119, 20692, 14314, 20979, 12562, 13405, 26950, 20254, 108075, 27055, 20563, 216616, 11747, 69675, 20259, 13386, 22288, 227325, 76293, 21826, 21824, 16410, 52377, 20392, 107589, 17390, 58859, 12552, 98932	Cacna2d1,Cadps,Mgp,Mrc2,Smoc2,Fkbp10,Sparcl1,Syt11,Nid2,Fbln1,Fbln2,Itsn1 ,Nid1,Fbn1,Lrp1,Mmp14,Fbn2,Sparc,Fstl1,Syt1,Cdh5,Dmd,Vsnl1,Scg2,Ltbp4,Fkbp9,Slit2,Efemp1,Anxa5,Pxdn,Scin,Dlk1,Utrn,Dner,Mfap4,Thbs2,Thbd,Itgav,Rcn3,Sgce,Mylk,Mmp2,Efemp2,Cdh11,Myl9	290	766	10854	2.19875	0.000367784	9.19586e-05	0.0012827
	GO:0003779~actin binding	24	5.86797	1.39685e-06	69538, 21952, 20742, 109624, 13800, 65970, 27360, 19241, 12798, 20259, 20743, 22004, 22288, 11518, 104027, 17755, 18645, 22003, 57342, 107589, 16796, 22628, 13822, 13405	Antxr1,Tnni1,Spnb2,Cald1,Enah,Lima1,Add3,Tmsb4x,Cnn2,Scin,Spnb3,Tpm2,Utrn,Add1,Synpo,Mtap1b,Pfn2,Tpm1,Parva,Mylk,Lasp1,Ywhag,Epb4.1l2,Dmd	290	278	10854	3.23116	0.000558585	0.000111742	0.00194832
	GO:0001871~pattern binding	15	3.66748	4.25826e-06	50706, 11803, 12831, 12111, 64074, 11816, 20720, 19242, 13179, 67896, 21826, 14118, 21814, 17242, 14314	Postn,Aplp1,Col5a1,Bgn,Smoc2,Apoe,Serpine2,Ptn,Dcn,Ccdc80,Thbs2,Fbn1,Tgfbr3,Mdk,Fstl1	290	122	10854	4.60175	0.00170186	0.000283845	0.00593929
	GO:0030247~polysaccharide binding	15	3.66748	4.25826e-06	50706, 11803, 12831, 12111, 64074, 11816, 20720, 19242, 13179, 67896, 21826, 14118, 21814, 17242, 14314	Postn,Aplp1,Col5a1,Bgn,Smoc2,Apoe,Serpine2,Ptn,Dcn,Ccdc80,Thbs2,Fbn1,Tgfbr3,Mdk,Fstl1	290	122	10854	4.60175	0.00170186	0.000283845	0.00593929
	GO:0005539~glycosaminoglycan binding	14	3.42298	5.52404e-06	50706, 11803, 12831, 12111, 64074, 11816, 20720, 19242, 13179, 67896, 21826, 21814, 17242, 14314	Postn,Aplp1,Col5a1,Bgn,Smoc2,Apoe,Serpine2,Ptn,Dcn,Ccdc80,Thbs2,Tgfbr3,Mdk,Fstl1	290	108	10854	4.85172	0.00220718	0.00031561	0.00770469
	GO:0008092~cytoskeletal protein binding	28	6.84597	7.23791e-06	20742, 21952, 53318, 19241, 17150, 20743, 11518, 15529, 104027, 18645, 57342, 16796, 17984, 13405, 69538, 13800, 109624, 65970, 27360, 12798, 20259, 22004, 22288, 17755, 22003, 107589, 13822, 22628	Spnb2,Tnni1,Pdlim3,Tmsb4x,Mfap2,Spnb3,Add1,Sdc2,Synpo,Pfn2,Parva,Lasp1,Ndn,Dmd,Antxr1,Enah,Cald1,Lima1,Add3,Cnn2,Scin,Tpm2,Utrn,Mtap1b,Tpm1,Mylk,Epb4.1l2,Ywhag	290	397	10854	2.63973	0.00289099	0.000361831	0.010095
	GO:0050840~extracellular matrix binding	7	1.71149	3.90902e-05	21810, 14115, 18073, 12111, 13179, 20692, 13717	Tgfbi,Fbln2,Nid1,Bgn,Dcn,Sparc,Eln	290	25	10854	10.4797	0.0155148	0.00173587	0.0545095
	GO:0005198~structural molecule activity	26	6.35697	4.88806e-05	12831, 20742, 12832, 53318, 54160, 20743, 12818, 16905, 11518, 226519, 14118, 14119, 13717, 12843, 12842, 27360, 12386, 12825, 12826, 22352, 22004, 21826, 107581, 22003, 110310, 13822	Col5a1,Spnb2,Col5a2,Pdlim3,Copg2,Spnb3,Col14a1,Lmna,Add1,Lamc1,Fbn1,Fbn2,Eln,Col1a2,Col1a1,Add3,Ctnna2,Col3a1,Col4a1,Vim,Tpm2,Thbs2,Col16a1,Tpm1,Krt7,Epb4.1l2	290	393	10854	2.47613	0.0193628	0.00177594	0.0681573
	GO:0008201~heparin binding	11	2.68949	4.86304e-05	50706, 12831, 11803, 21826, 64074, 11816, 17242, 20720, 19242, 14314, 67896	Postn,Col5a1,Aplp1,Thbs2,Smoc2,Apoe,Mdk,Serpine2,Ptn,Fstl1,Ccdc80	290	80	10854	5.14629	0.0192647	0.00194337	0.0678087
	GO:0005520~insulin-like growth factor binding	6	1.46699	0.000234567	16009, 22402, 16011, 16008, 56213, 16004	Igfbp3,Wisp1,Igfbp5,Igfbp2,Htra1,Igf2r	290	22	10854	10.2075	0.0895696	0.00778933	0.326679
	GO:0001540~beta-amyloid binding	4	0.977995	0.00139298	70237, 11816, 21808, 245607	Bhlhb9,Apoe,Tgfb2,Gprasp2	290	9	10854	16.6345	0.427407	0.0419839	1.92551
KEGG_PATHWAY	mmu04512: ECM-receptor interaction	17	4.15648	3.75326e-10	12843, 12831, 16775, 12832, 12842, 12833, 12825, 16423, 21923, 12826, 12834, 21826, 15529, 226519, 16410, 12491, 16773	Col1a2,Col5a1,Lama4,Col5a2,Col1a1,Col6a1,Col3a1,Cd47,Tnc,Col4a1,Col6a2,Thbs2,Sdc2,Lamc1,Itgav,Cd36,Lama2	131	78	4480	7.45351	4.12859e-08	4.12859e-08	4.24053e-07
	mmu04510: Focal adhesion	24	5.86797	3.13552e-09	12843, 13649, 16775, 12831, 12832, 12842, 12833, 12389, 12387, 21923, 12825, 12826, 12834, 18595, 330662, 21826, 226519, 16410, 12444, 57342, 107589, 19417, 16773, 98932	Col1a2,Egfr,Lama4,Col5a1,Col5a2,Col1a1,Col6a1,Cav1,Ctnnb1,Tnc,Col3a1,Col4a1,Col6a2,Pdgfra,Dock1,Thbs2,Lamc1,Itgav,Ccnd2,Parva,Mylk,Rasgrf1,Lama2,Myl9	131	191	4480	4.29719	3.44907e-07	1.72453e-07	3.54258e-06
	mmu04540: Gap junction	10	2.44499	0.000448295	18595, 14677, 13649, 14609, 13488, 14745, 60596, 54195, 11513, 14683	Pdgfra,Gnai1,Egfr,Gja1,Drd1a,Lpar1,Gucy1a3,Gucy1b3,Adcy7,Gnas	131	80	4480	4.27481	0.0481269	0.0122552	0.505328
	mmu05414: Dilated cardiomyopathy	12	2.93399	3.83907e-05	12293, 22004, 16410, 11464, 22003, 21808, 21809, 11513, 16773, 14683, 13405, 16905	Cacna2d1,Tpm2,Itgav,Actc1,Tpm1,Tgfb2,Tgfb3,Adcy7,Lama2,Gnas,Dmd,Lmna	131	88	4480	4.66343	0.00421415	0.0014067	0.0433662
	mmu05410: Hypertrophic cardiomyopathy	10	2.44499	0.000448295	12293, 22004, 16410, 11464, 22003, 21808, 21809, 16773, 13405, 16905	Cacna2d1,Tpm2,Itgav,Actc1,Tpm1,Tgfb2,Tgfb3,Lama2,Dmd,Lmna	131	80	4480	4.27481	0.0481269	0.0122552	0.505328
	mmu05412: Arrhythmogenic right ventricular cardiomyopathy (ARVC)	8	1.95599	0.00418162	12293, 14609, 16410, 12387, 12386, 16773, 13405, 16905	Cacna2d1,Gja1,Itgav,Ctnnb1,Ctnna2,Lama2,Dmd,Lmna	131	71	4480	3.85335	0.369311	0.0739469	4.62407
	mmu04270: Vascular smooth muscle contraction	10	2.44499	0.00381452	11468, 109624, 11475, 60596, 54195, 11513, 107589, 54409, 98932, 14683	Actg2,Cald1,Acta2,Gucy1a3,Gucy1b3,Adcy7,Mylk,Ramp2,Myl9,Gnas	131	108	4480	3.16653	0.343215	0.0806422	4.22608
