# Supplementary material for: A systems-level approach to parental genomic imprinting: the imprinted gene network includes extracellular matrix genes and regulates cell cycle exit and differentiation
Source: HighWire-hosted journal article supplement (doi:10.1101/gr.175919.114), 2015-01-22
Supplement: Table_S12.xlsx [file Table_S12.xlsx]

## Sheet: DAVID enrichment tools
RN No.	Category	Term	Count	%	PValue	Genes	List Total	Pop Hits	Pop Total	Fold Enrichment	Bonferroni	Benjamini	FDR
1	GOTERM_BP_FAT	GO:0006412~translation	61	12.8964	6.58081e-39	67115, 13667, 56347, 19935, 19934, 13665, 223691, 94063, 94066, 94067, 233870, 24030, 18120, 107733, 54709, 67025, 105148, 66448, 97541, 19921, 66292, 234734, 270106, 66481, 68572, 66407, 22384, 50529, 16865, 26987, 68537, 224045, 66590, 68836, 64657, 53356, 66419, 216767, 73635, 27979, 217057, 353242, 67994, 68565, 23874, 19951, 56282, 56284, 64660, 66229, 16418, 19982, 13722, 19981, 27398, 2739…	303	319	13588	8.57535	7.77852e-36	7.77852e-36	1.0619e-35
1	GOTERM_CC_FAT	GO:0030529~ribonucleoprotein complex	67	14.1649	5.88365e-33	67115, 27993, 19935, 19934, 94063, 94066, 94067, 24030, 218506, 65111, 107733, 18120, 20638, 67025, 69163, 66125, 100608, 66448, 67678, 19921, 66292, 27756, 270106, 56505, 66481, 64934, 66407, 50529, 75062, 66585, 68537, 68836, 64657, 107686, 28000, 66419, 20624, 53607, 68479, 216767, 353242, 67994, 67959, 68565, 102462, 18100, 19951, 66223, 99045, 56282, 68988, 56284, 64660, 66229, 67097, 69902,…	304	462	12504	5.96497	1.85335e-30	9.26675e-31	7.92081e-30
1	GOTERM_CC_FAT	GO:0005840~ribosome	47	9.93658	3.66683e-33	67115, 68836, 64657, 19935, 19934, 66419, 94063, 94066, 216767, 94067, 24030, 353242, 67994, 218506, 65111, 68565, 107733, 18120, 18100, 67025, 69163, 19951, 99045, 66223, 56282, 66448, 19921, 66292, 56284, 64660, 270106, 66229, 67097, 66481, 66407, 50529, 69902, 19982, 19981, 27398, 27397, 19899, 68537, 16785, 27395, 19942, 67941	304	192	12504	10.0687	1.15505e-30	1.15505e-30	4.93643e-30
1	GOTERM_CC_FAT	GO:0005739~mitochondrion	104	21.9873	7.42221e-29	66377, 66379, 22272, 21379, 12015, 69875, 12856, 66169, 67003, 66407, 17713, 11951, 17995, 68537, 14356, 68836, 208501, 216767, 217057, 30056, 30059, 67994, 30058, 12034, 30055, 66916, 18100, 66091, 66046, 68375, 66594, 18102, 18103, 99045, 108888, 22059, 380773, 56428, 27398, 27397, 27395, 70316, 19935, 53333, 67267, 94063, 94066, 66077, 94067, 18673, 58865, 233870, 24030, 218506, 65111, 107733,…	304	1322	12504	3.23577	2.338e-26	7.79332e-27	9.99208e-26
1	GOTERM_MF_FAT	GO:0003735~structural constituent of ribosome	38	8.03383	4.72164e-29	67115, 68836, 64657, 19935, 19934, 66419, 94063, 94066, 216767, 24030, 353242, 67994, 68565, 107733, 18120, 67025, 19951, 56282, 66448, 19921, 66292, 56284, 64660, 270106, 66229, 66481, 66407, 50529, 19982, 19981, 27398, 27397, 19899, 68537, 16785, 19942, 27395, 67941	286	151	13288	11.6923	1.78006e-26	1.78006e-26	6.52899e-26
1	GOTERM_CC_FAT	GO:0044429~mitochondrial part	63	13.3192	2.82797e-26	66377, 19935, 53333, 94063, 22272, 94066, 94067, 18673, 233870, 69875, 12015, 12856, 65111, 66169, 107733, 67003, 110323, 17448, 15108, 66448, 66292, 66445, 17713, 50529, 11951, 66119, 104130, 57423, 17995, 68194, 68537, 68198, 68197, 12261, 14356, 68836, 64657, 66416, 66419, 30056, 30059, 30058, 12034, 66916, 30055, 18100, 66091, 68375, 66046, 13063, 28080, 66594, 56282, 68653, 108888, 56284, 67…	304	524	12504	4.94521	8.9081e-24	2.22703e-24	3.80713e-23
1	GOTERM_CC_FAT	GO:0000313~organellar ribosome	19	4.01691	5.96353e-19	56282, 68836, 64657, 66448, 19935, 56284, 66419, 64660, 94063, 94066, 94067, 50529, 65111, 107733, 27398, 18100, 27397, 68537, 27395	304	41	12504	19.061	1.87851e-16	3.75702e-17	8.02834e-16
1	GOTERM_CC_FAT	GO:0005761~mitochondrial ribosome	19	4.01691	5.96353e-19	56282, 68836, 64657, 66448, 19935, 56284, 66419, 64660, 94063, 94066, 94067, 50529, 65111, 107733, 27398, 18100, 27397, 68537, 27395	304	41	12504	19.061	1.87851e-16	3.75702e-17	8.02834e-16
1	GOTERM_CC_FAT	GO:0033279~ribosomal subunit	22	4.65116	1.87889e-18	68836, 64657, 66448, 19935, 19921, 66419, 64660, 66229, 94063, 94066, 216767, 94067, 50529, 24030, 65111, 107733, 27398, 27397, 68537, 16785, 19951, 27395	304	66	12504	13.7105	5.91851e-16	9.86419e-17	2.52944e-15
1	GOTERM_CC_FAT	GO:0015934~large ribosomal subunit	17	3.59408	2.10612e-16	68836, 19935, 66448, 19921, 66419, 64660, 66229, 94063, 94066, 216767, 94067, 107733, 27398, 27397, 68537, 27395, 19951	304	39	12504	17.9291	6.99441e-14	9.99201e-15	2.9976e-13
1	GOTERM_CC_FAT	GO:0019866~organelle inner membrane	38	8.03383	7.79329e-16	14356, 66377, 66416, 22272, 18673, 233870, 30056, 30059, 69875, 30058, 12034, 30055, 66916, 66091, 67003, 66046, 68375, 28080, 110323, 66594, 68653, 15108, 17448, 108888, 66292, 67126, 66445, 16418, 223696, 11951, 104130, 56428, 57423, 17995, 27397, 68194, 68198, 68197	304	312	12504	5.00962	2.44804e-13	3.06422e-14	1.04361e-12
1	GOTERM_CC_FAT	GO:0005743~mitochondrial inner membrane	37	7.82241	8.72212e-16	14356, 66377, 66416, 22272, 18673, 233870, 30056, 30059, 69875, 30058, 12034, 30055, 66916, 66091, 67003, 66046, 68375, 28080, 110323, 66594, 68653, 15108, 17448, 108888, 66292, 67126, 66445, 223696, 11951, 104130, 56428, 57423, 17995, 27397, 68194, 68198, 68197	304	296	12504	5.14145	2.79776e-13	3.10862e-14	1.19904e-12
1	GOTERM_CC_FAT	GO:0031966~mitochondrial membrane	41	8.66808	1.05542e-15	14356, 66377, 66416, 53333, 22272, 18673, 233870, 30056, 12015, 30059, 69875, 30058, 66169, 12034, 30055, 66916, 66091, 67003, 66046, 68375, 28080, 66594, 110323, 68653, 15108, 17448, 108888, 66292, 67126, 66445, 223696, 11951, 66119, 104130, 56428, 57423, 17995, 27397, 68194, 68198, 68197	304	368	12504	4.58259	3.4972e-13	3.4972e-14	1.4988e-12
1	GOTERM_CC_FAT	GO:0005740~mitochondrial envelope	42	8.87949	1.56874e-15	14356, 66377, 66416, 53333, 22272, 18673, 233870, 30056, 12015, 30059, 69875, 30058, 12856, 66169, 12034, 30055, 66916, 66091, 67003, 66046, 68375, 28080, 66594, 110323, 68653, 15108, 17448, 108888, 66292, 67126, 66445, 223696, 11951, 66119, 104130, 56428, 57423, 17995, 27397, 68194, 68198, 68197	304	391	12504	4.41823	4.89608e-13	4.45199e-14	2.08722e-12
1	GOTERM_CC_FAT	GO:0031974~membrane-enclosed lumen	76	16.0677	1.81734e-15	27993, 27681, 19935, 66538, 223691, 74097, 94063, 94066, 54451, 94067, 69833, 66164, 94230, 12856, 65111, 107733, 109075, 28126, 24075, 110323, 100608, 17448, 66448, 67676, 54364, 56505, 19646, 64934, 17713, 69920, 50529, 101612, 28114, 68537, 78929, 12261, 67134, 14356, 68836, 64657, 227656, 28000, 66419, 68479, 56321, 17192, 30056, 97961, 30059, 30058, 66310, 30055, 102462, 20220, 18100, 13063,…	304	1174	12504	2.66269	5.59552e-13	4.66294e-14	2.38698e-12
1	GOTERM_CC_FAT	GO:0043228~non-membrane-bounded organelle	101	21.3531	7.25362e-15	27993, 223691, 11733, 66164, 18221, 67025, 28126, 14375, 100608, 20587, 66481, 66407, 64934, 22283, 101612, 101314, 28114, 385317, 68537, 68836, 68475, 70069, 216767, 68479, 67994, 18100, 22154, 18102, 99045, 66722, 22059, 23825, 67154, 69654, 53414, 19982, 64424, 19981, 27398, 27397, 27395, 16580, 67115, 19935, 19934, 66538, 74097, 94063, 94066, 94067, 24030, 70292, 218506, 26426, 65111, 107733,…	304	1919	12504	2.16482	2.27318e-12	1.7486e-13	9.71445e-12
1	GOTERM_CC_FAT	GO:0043232~intracellular non-membrane-bounded organelle	101	21.3531	7.25362e-15	27993, 223691, 11733, 66164, 18221, 67025, 28126, 14375, 100608, 20587, 66481, 66407, 64934, 22283, 101612, 101314, 28114, 385317, 68537, 68836, 68475, 70069, 216767, 68479, 67994, 18100, 22154, 18102, 99045, 66722, 22059, 23825, 67154, 69654, 53414, 19982, 64424, 19981, 27398, 27397, 27395, 16580, 67115, 19935, 19934, 66538, 74097, 94063, 94066, 94067, 24030, 70292, 218506, 26426, 65111, 107733,…	304	1919	12504	2.16482	2.27318e-12	1.7486e-13	9.71445e-12
1	GOTERM_CC_FAT	GO:0070469~respiratory chain	19	4.01691	8.98626e-15	70316, 66377, 66416, 66445, 22272, 69875, 104130, 66916, 66091, 67003, 17995, 68194, 13063, 66046, 68375, 225887, 68198, 66594, 68197	304	65	12504	12.0231	2.83273e-12	2.02283e-13	1.21014e-11
1	GOTERM_CC_FAT	GO:0005762~mitochondrial large ribosomal subunit	13	2.74841	3.51449e-14	68836, 19935, 66448, 66419, 64660, 94063, 94066, 94067, 107733, 27398, 27397, 68537, 27395	304	23	12504	23.2483	1.10861e-11	7.39075e-13	4.73843e-11
1	GOTERM_CC_FAT	GO:0000315~organellar large ribosomal subunit	13	2.74841	3.51449e-14	68836, 19935, 66448, 66419, 64660, 94063, 94066, 94067, 107733, 27398, 27397, 68537, 27395	304	23	12504	23.2483	1.10861e-11	7.39075e-13	4.73843e-11
1	GOTERM_MF_FAT	GO:0005198~structural molecule activity	41	8.66808	1.55186e-14	67115, 68836, 64657, 19935, 19934, 66419, 94063, 94066, 216767, 24030, 353242, 67994, 68565, 107733, 18120, 22154, 67025, 19951, 56282, 66448, 19921, 66292, 56284, 64660, 270106, 66229, 66481, 66407, 50529, 19982, 19981, 103733, 70843, 27398, 27397, 19899, 68537, 16785, 27395, 19942, 67941	286	450	13288	4.23316	5.85976e-12	2.92988e-12	2.14939e-11
1	GOTERM_CC_FAT	GO:0031967~organelle envelope	46	9.72516	2.64709e-13	223921, 14356, 66377, 66416, 53333, 22272, 18673, 233870, 30056, 30059, 12015, 69875, 30058, 12856, 66169, 12034, 66916, 30055, 66091, 67003, 23897, 68375, 66046, 28080, 66594, 110323, 68653, 15108, 17448, 108888, 66292, 67126, 14084, 66445, 16418, 223696, 11951, 66119, 104130, 56428, 57423, 17995, 68194, 27397, 68198, 68197	304	540	12504	3.5038	8.33733e-11	5.21083e-12	3.56315e-10
1	GOTERM_CC_FAT	GO:0031975~envelope	46	9.72516	3.01337e-13	223921, 14356, 66377, 66416, 53333, 22272, 18673, 233870, 30056, 30059, 12015, 69875, 30058, 12856, 66169, 12034, 66916, 30055, 66091, 67003, 23897, 68375, 66046, 28080, 66594, 110323, 68653, 15108, 17448, 108888, 66292, 67126, 14084, 66445, 16418, 223696, 11951, 66119, 104130, 56428, 57423, 17995, 68194, 27397, 68198, 68197	304	542	12504	3.49087	9.49141e-11	5.5832e-12	4.05642e-10
1	KEGG_PATHWAY	mmu00190:Oxidative phosphorylation	24	5.074	2.51214e-13	70316, 66377, 66416, 67126, 66445, 22272, 11951, 69875, 12856, 66916, 66091, 57423, 67003, 17995, 68194, 66046, 68375, 67942, 225887, 28080, 66594, 110323, 68198, 68197	155	130	5738	6.83434	2.76368e-11	1.38184e-11	2.83862e-10
1	GOTERM_CC_FAT	GO:0070013~intracellular organelle lumen	69	14.5877	1.0508e-12	27681, 27993, 19935, 66538, 223691, 74097, 94063, 94066, 54451, 94067, 66164, 69833, 94230, 65111, 107733, 109075, 28126, 24075, 100608, 17448, 66448, 67676, 54364, 56505, 19646, 64934, 17713, 69920, 50529, 101612, 28114, 68537, 12261, 78929, 67134, 68836, 64657, 227656, 28000, 66419, 68479, 56321, 17192, 97961, 66310, 102462, 20220, 18100, 13063, 56282, 67397, 68988, 192191, 56284, 22059, 64660,…	304	1133	12504	2.50492	3.3101e-10	1.83894e-11	1.41467e-09
1	KEGG_PATHWAY	mmu05016:Huntington's disease	28	5.91966	1.73414e-13	70316, 66377, 66416, 22272, 69833, 66916, 66091, 67003, 66046, 13063, 68375, 28080, 110323, 66594, 108071, 67126, 22059, 66445, 232910, 69654, 69920, 11951, 68194, 17995, 225887, 67942, 68198, 68197	155	183	5738	5.66416	1.90759e-11	1.90759e-11	1.95932e-10
1	GOTERM_CC_FAT	GO:0043233~organelle lumen	69	14.5877	1.19268e-12	27681, 27993, 19935, 66538, 223691, 74097, 94063, 94066, 54451, 94067, 66164, 69833, 94230, 65111, 107733, 109075, 28126, 24075, 100608, 17448, 66448, 67676, 54364, 56505, 19646, 64934, 17713, 69920, 50529, 101612, 28114, 68537, 12261, 78929, 67134, 68836, 64657, 227656, 28000, 66419, 68479, 56321, 17192, 97961, 66310, 102462, 20220, 18100, 13063, 56282, 67397, 68988, 192191, 56284, 22059, 64660,…	304	1136	12504	2.49831	3.75704e-10	1.9774e-11	1.60568e-09
1	KEGG_PATHWAY	mmu05012:Parkinson's disease	23	4.86258	3.60955e-12	70316, 66377, 66416, 67126, 57320, 66445, 22272, 11951, 66916, 66091, 67003, 17995, 68194, 13063, 66046, 68375, 67942, 225887, 28080, 110323, 68198, 66594, 68197	155	133	5738	6.40184	3.97051e-10	1.3235e-10	4.07817e-09
1	GOTERM_CC_FAT	GO:0005759~mitochondrial matrix	23	4.86258	5.78632e-11	56282, 68836, 64657, 17448, 66448, 19935, 66419, 56284, 64660, 94063, 94066, 94067, 17713, 50529, 65111, 107733, 27398, 18100, 27397, 13063, 68537, 12261, 27395	304	163	12504	5.80384	1.82269e-08	9.11346e-10	7.78979e-08
1	GOTERM_CC_FAT	GO:0031980~mitochondrial lumen	23	4.86258	5.78632e-11	56282, 68836, 64657, 17448, 66448, 19935, 66419, 56284, 64660, 94063, 94066, 94067, 17713, 50529, 65111, 107733, 27398, 18100, 27397, 13063, 68537, 12261, 27395	304	163	12504	5.80384	1.82269e-08	9.11346e-10	7.78979e-08
1	KEGG_PATHWAY	mmu05010:Alzheimer's disease	24	5.074	3.30624e-10	70316, 66377, 15108, 66416, 67126, 66445, 22272, 11951, 12015, 66916, 66091, 67003, 17995, 68194, 13063, 66046, 68375, 67942, 225887, 28080, 110323, 68198, 66594, 68197	155	182	5738	4.88167	3.63686e-08	9.09215e-09	3.73547e-07
1	GOTERM_CC_FAT	GO:0031090~organelle membrane	51	10.7822	6.79531e-10	66377, 53333, 22272, 18673, 233870, 12015, 69875, 66169, 67003, 23897, 110323, 15108, 17448, 66292, 66445, 13481, 11951, 66119, 56447, 104130, 57423, 68194, 17995, 208092, 68198, 68197, 14356, 66416, 66059, 30056, 30059, 30058, 12034, 30055, 66916, 66091, 66046, 68375, 28080, 66594, 68653, 108888, 67126, 66460, 16418, 223696, 53618, 232910, 20014, 56428, 27397	304	809	12504	2.59297	2.14052e-07	1.0193e-08	9.14813e-07
1	GOTERM_BP_FAT	GO:0022900~electron transport chain	19	4.01691	4.55651e-11	70316, 66377, 66416, 66445, 22272, 69875, 104130, 66916, 66091, 67003, 17995, 68194, 13063, 66046, 68375, 225887, 68198, 66594, 68197	303	112	13588	7.60761	5.3858e-08	2.6929e-08	7.35251e-08
1	GOTERM_MF_FAT	GO:0003723~RNA binding	43	9.09091	3.57503e-10	66590, 67842, 27993, 19935, 53356, 19934, 66419, 13665, 66055, 94063, 53607, 54451, 66164, 27979, 94230, 97961, 353242, 67959, 102462, 20638, 109075, 67025, 15547, 69163, 23874, 105559, 234374, 68035, 68988, 27632, 66448, 97541, 67678, 57320, 27756, 22384, 50529, 16865, 13722, 380773, 28114, 26987, 50783	286	672	13288	2.97299	1.34779e-07	4.49262e-08	4.94348e-07
1	GOTERM_CC_FAT	GO:0000502~proteasome complex	13	2.74841	1.08597e-08	20422, 23996, 26440, 26442, 66537, 56436, 19188, 19179, 19182, 19173, 19172, 19170, 57296	304	58	12504	9.21915	3.42081e-06	1.55492e-07	1.46198e-05
1	GOTERM_MF_FAT	GO:0008135~translation factor activity, nucleic acid binding	16	3.38266	2.39562e-09	13667, 56347, 53356, 13665, 20624, 223691, 16418, 68572, 22384, 27979, 233870, 16865, 54709, 26987, 224045, 66126	286	98	13288	7.58556	9.03149e-07	2.25787e-07	3.31262e-06
1	KEGG_PATHWAY	mmu03050:Proteasome	12	2.537	2.7593e-08	19188, 20422, 19179, 23996, 19173, 26440, 19182, 19172, 26442, 66537, 57296, 19170	155	47	5738	9.45175	3.03522e-06	6.07045e-07	3.11752e-05
1	GOTERM_BP_FAT	GO:0006396~RNA processing	33	6.97674	3.01748e-09	27993, 107686, 214572, 28000, 20624, 66055, 74097, 53607, 54451, 68479, 94230, 67959, 224907, 102462, 20638, 109075, 15547, 69163, 66125, 68988, 15108, 67678, 67676, 234734, 27756, 54364, 28035, 64934, 68730, 75062, 28114, 66585, 50783	303	437	13588	3.38646	3.56666e-06	1.18889e-06	4.86909e-06
1	GOTERM_BP_FAT	GO:0006091~generation of precursor metabolites and energy	25	5.28541	4.03135e-09	70316, 66416, 66377, 22272, 69875, 66916, 67003, 66091, 68375, 66046, 13063, 28080, 66594, 17448, 67126, 66445, 11951, 66849, 104130, 68194, 17995, 225887, 67942, 68198, 68197	303	261	13588	4.29549	4.76505e-06	1.19126e-06	6.5051e-06
1	KEGG_PATHWAY	mmu03010:Ribosome	15	3.17125	7.4839e-08	67115, 19921, 19934, 270106, 67097, 66481, 19982, 19981, 19899, 67025, 68537, 16785, 19951, 19942, 67941	155	89	5738	6.23922	8.23226e-06	1.37205e-06	8.4555e-05
1	GOTERM_CC_FAT	GO:0005730~nucleolus	26	5.49683	1.39669e-07	67134, 227656, 27993, 66538, 223691, 74097, 56321, 68479, 66164, 17192, 97961, 102462, 109075, 28126, 100608, 67676, 22059, 54364, 67154, 64934, 69902, 101612, 53414, 64424, 28114, 20019	304	310	12504	3.44975	4.39947e-05	1.91285e-06	0.000188028
1	GOTERM_MF_FAT	GO:0003743~translation initiation factor activity	12	2.537	7.01492e-08	22384, 27979, 13667, 16865, 53356, 56347, 54709, 13665, 26987, 223691, 16418, 224045	286	62	13288	8.99256	2.64459e-05	5.28924e-06	9.7001e-05
1	KEGG_PATHWAY	mmu03040:Spliceosome	16	3.38266	8.73477e-07	68988, 107686, 67678, 28000, 20624, 66055, 27756, 28035, 53607, 68479, 67959, 75062, 20638, 66585, 50783, 66125	155	124	5738	4.77669	9.60779e-05	1.3726e-05	0.000986871
1	GOTERM_CC_FAT	GO:0031981~nuclear lumen	45	9.51374	3.55343e-06	67134, 227656, 27993, 27681, 28000, 66538, 223691, 74097, 68479, 56321, 54451, 66164, 69833, 17192, 97961, 94230, 66310, 102462, 20220, 109075, 28126, 24075, 100608, 68988, 192191, 67676, 22059, 54364, 56505, 67154, 16418, 67224, 19646, 64934, 69920, 69902, 101612, 53414, 64424, 80509, 28114, 20019, 50783, 50496, 78929	304	883	12504	2.09617	0.0011187	4.66377e-05	0.00478366
1	KEGG_PATHWAY	mmu00240:Pyrimidine metabolism	13	2.74841	8.12334e-06	21915, 18972, 54369, 69833, 69920, 59001, 64424, 20016, 20133, 20019, 78929, 18102, 18103	155	96	5738	5.01304	0.000893172	0.00011169	0.00917757
1	GOTERM_CC_FAT	GO:0042719~mitochondrial intermembrane space protein transporter complex	5	1.05708	1.11703e-05	30056, 14356, 30059, 30058, 30055	304	7	12504	29.3797	0.00351247	0.000140736	0.0150368
1	KEGG_PATHWAY	mmu00230:Purine metabolism	16	3.38266	1.69523e-05	14923, 11821, 14450, 18972, 54369, 69833, 69920, 59001, 64424, 20016, 20133, 18577, 20019, 78929, 18102, 18103	155	157	5738	3.77267	0.00186303	0.000207175	0.0191515
1	GOTERM_BP_FAT	GO:0006413~translational initiation	9	1.90275	1.48582e-06	27979, 13667, 16865, 53356, 56347, 54709, 26987, 223691, 224045	303	38	13588	10.6212	0.0017547	0.000351187	0.00239753
1	GOTERM_CC_FAT	GO:0005681~spliceosome	13	2.74841	4.65848e-05	68988, 107686, 67678, 28000, 20624, 27756, 53607, 68479, 75062, 66585, 20638, 50783, 66125	304	124	12504	4.31218	0.0145674	0.000564246	0.0626961
1	GOTERM_CC_FAT	GO:0005758~mitochondrial intermembrane space	7	1.47992	7.00349e-05	30056, 14356, 30059, 30058, 12856, 30055, 110323	304	30	12504	9.59737	0.0218202	0.000816768	0.0942426
1	GOTERM_BP_FAT	GO:0045039~protein import into mitochondrial inner membrane	5	1.05708	7.94238e-06	30056, 14356, 30059, 30058, 30055	303	7	13588	32.0321	0.009344	0.0011728	0.0128153
1	GOTERM_BP_FAT	GO:0034660~ncRNA metabolic process	17	3.59408	1.15197e-05	66590, 15108, 97541, 27993, 67676, 234734, 74097, 54364, 64934, 73635, 68730, 224907, 102462, 28114, 109075, 23874, 105148	303	202	13588	3.77407	0.013524	0.00123708	0.0185868
1	GOTERM_BP_FAT	GO:0070585~protein localization in mitochondrion	7	1.47992	6.33877e-06	30056, 14356, 30059, 30058, 30055, 53333, 17713	303	22	13588	14.2688	0.00746446	0.00124796	0.0102279
1	GOTERM_BP_FAT	GO:0006626~protein targeting to mitochondrion	7	1.47992	6.33877e-06	30056, 14356, 30059, 30058, 30055, 53333, 17713	303	22	13588	14.2688	0.00746446	0.00124796	0.0102279
1	GOTERM_BP_FAT	GO:0008380~RNA splicing	17	3.59408	1.082e-05	68988, 107686, 67678, 214572, 28000, 20624, 66055, 27756, 28035, 53607, 68479, 67959, 75062, 20638, 66585, 50783, 66125	303	201	13588	3.79285	0.0127078	0.00127811	0.017458
1	GOTERM_BP_FAT	GO:0007005~mitochondrion organization	12	2.537	9.91654e-06	30056, 14356, 30059, 30058, 65111, 30055, 22059, 27397, 53333, 67811, 27395, 17713	303	97	13588	5.54782	0.011653	0.00130153	0.0160004
1	GOTERM_BP_FAT	GO:0006399~tRNA metabolic process	13	2.74841	7.78587e-06	66590, 15108, 97541, 67676, 234734, 74097, 54364, 73635, 68730, 224907, 28114, 23874, 105148	303	113	13588	5.15915	0.00916072	0.00131384	0.0125628
1	GOTERM_BP_FAT	GO:0007007~inner mitochondrial membrane organization	5	1.05708	1.56066e-05	30056, 14356, 30059, 30058, 30055	303	8	13588	28.0281	0.018278	0.00153608	0.0251802
1	GOTERM_CC_FAT	GO:0005852~eukaryotic translation initiation factor 3 complex	5	1.05708	0.000143484	27979, 53356, 56347, 54709, 223691	304	12	12504	17.1382	0.0441944	0.00161301	0.192992
1	GOTERM_BP_FAT	GO:0006397~mRNA processing	19	4.01691	2.31337e-05	68988, 107686, 67678, 214572, 28000, 20624, 66055, 27756, 28035, 53607, 54451, 68479, 94230, 67959, 75062, 20638, 66585, 50783, 66125	303	262	13588	3.25211	0.0269739	0.0021012	0.0373226
1	GOTERM_BP_FAT	GO:0006839~mitochondrial transport	8	1.69133	3.45797e-05	30056, 14356, 30059, 30058, 30055, 22059, 53333, 17713	303	42	13588	8.54188	0.0400498	0.00291531	0.0557842
1	GOTERM_CC_FAT	GO:0031970~organelle envelope lumen	7	1.47992	0.000369375	30056, 14356, 30059, 30058, 12856, 30055, 110323	304	40	12504	7.19803	0.109858	0.00400488	0.496125
1	GOTERM_BP_FAT	GO:0022613~ribonucleoprotein complex biogenesis	13	2.74841	5.45184e-05	67134, 68988, 27993, 214572, 27756, 16418, 56321, 64934, 66164, 69902, 53414, 102462, 109075	303	137	13588	4.25535	0.0624099	0.00428695	0.087936
1	GOTERM_MF_FAT	GO:0003899~DNA-directed RNA polymerase activity	7	1.47992	8.87954e-05	69920, 68925, 64424, 20016, 20019, 78929, 69833	286	35	13288	9.29231	0.0329232	0.00556402	0.122715
1	GOTERM_MF_FAT	GO:0034062~RNA polymerase activity	7	1.47992	8.87954e-05	69920, 68925, 64424, 20016, 20019, 78929, 69833	286	35	13288	9.29231	0.0329232	0.00556402	0.122715
1	GOTERM_BP_FAT	GO:0017038~protein import	10	2.11416	8.30137e-05	30056, 14356, 30059, 30058, 19384, 30055, 22059, 53333, 68051, 17713	303	82	13588	5.46889	0.0934656	0.00611413	0.133869
1	GOTERM_CC_FAT	GO:0015935~small ribosomal subunit	6	1.2685	0.000595219	50529, 24030, 64657, 65111, 64660, 16785	304	29	12504	8.50998	0.171012	0.00623216	0.798343
1	GOTERM_MF_FAT	GO:0050136~NADH dehydrogenase (quinone) activity	6	1.2685	0.00013327	66416, 66916, 17995, 68194, 225887, 68197	286	24	13288	11.6154	0.0490048	0.00715234	0.184126
1	GOTERM_MF_FAT	GO:0008137~NADH dehydrogenase (ubiquinone) activity	6	1.2685	0.00013327	66416, 66916, 17995, 68194, 225887, 68197	286	24	13288	11.6154	0.0490048	0.00715234	0.184126
1	GOTERM_MF_FAT	GO:0003954~NADH dehydrogenase activity	6	1.2685	0.00013327	66416, 66916, 17995, 68194, 225887, 68197	286	24	13288	11.6154	0.0490048	0.00715234	0.184126
1	KEGG_PATHWAY	mmu03020:RNA polymerase	6	1.2685	0.000653175	69920, 64424, 20016, 20019, 78929, 69833	155	27	5738	8.22652	0.0693506	0.0071615	0.735496
1	GOTERM_CC_FAT	GO:0005829~cytosol	27	5.70825	0.000862974	214572, 26440, 101489, 26442, 66537, 56321, 12015, 12729, 19188, 26425, 19182, 22154, 13063, 19951, 19921, 23996, 14084, 22059, 58810, 68559, 50529, 12539, 13722, 12462, 67199, 19170, 57296	304	549	12504	2.02286	0.238111	0.00873434	1.15554
1	GOTERM_CC_FAT	GO:0045259~proton-transporting ATP synthase complex	5	1.05708	0.000982526	11951, 67126, 57423, 28080, 67942	304	19	12504	10.8241	0.266295	0.00962982	1.31465
1	GOTERM_CC_FAT	GO:0030880~RNA polymerase complex	5	1.05708	0.000982526	69920, 68925, 20019, 78929, 69833	304	19	12504	10.8241	0.266295	0.00962982	1.31465
1	GOTERM_BP_FAT	GO:0016071~mRNA metabolic process	19	4.01691	0.000145494	68988, 107686, 67678, 214572, 28000, 20624, 66055, 27756, 28035, 53607, 54451, 68479, 94230, 67959, 75062, 20638, 66585, 50783, 66125	303	302	13588	2.82137	0.15801	0.0100659	0.234515
1	GOTERM_MF_FAT	GO:0016655~oxidoreductase activity, acting on NADH or NADPH, quinone or similar compound as acceptor	6	1.2685	0.00024014	66416, 66916, 17995, 68194, 225887, 68197	286	27	13288	10.3248	0.0865657	0.0112542	0.331551
1	GOTERM_CC_FAT	GO:0005839~proteasome core complex	5	1.05708	0.00120493	19173, 26440, 19172, 26442, 19170	304	20	12504	10.2829	0.315989	0.0114425	1.61
1	GOTERM_BP_FAT	GO:0007006~mitochondrial membrane organization	6	1.2685	0.000235135	30056, 14356, 30059, 30058, 30055, 22059	303	26	13588	10.3488	0.242675	0.0153237	0.378746
1	GOTERM_BP_FAT	GO:0033365~protein localization in organelle	10	2.11416	0.000302829	30056, 14356, 30059, 30058, 19384, 30055, 22059, 53333, 68051, 17713	303	97	13588	4.62318	0.300926	0.0186656	0.487535
1	GOTERM_CC_FAT	GO:0030532~small nuclear ribonucleoprotein complex	4	0.845666	0.00263476	68988, 67678, 27756, 68479	304	12	12504	13.7105	0.564406	0.0241462	3.48937
1	GOTERM_BP_FAT	GO:0055114~oxidation reduction	30	6.34249	0.00048795	70316, 66377, 66416, 22272, 58865, 69875, 224907, 66916, 66091, 67003, 66046, 13063, 68375, 11692, 66594, 15108, 17448, 58810, 66445, 106529, 68730, 69051, 104130, 20133, 68194, 15369, 17995, 225887, 68198, 68197	303	672	13588	2.002	0.438362	0.0284328	0.784468
1	GOTERM_MF_FAT	GO:0043021~ribonucleoprotein binding	6	1.2685	0.000732214	68988, 27993, 56347, 102462, 66481, 16418	286	34	13288	8.1991	0.241298	0.0302169	1.00775
1	GOTERM_MF_FAT	GO:0070003~threonine-type peptidase activity	5	1.05708	0.000929591	19173, 26440, 19172, 26442, 19170	286	21	13288	11.0623	0.295748	0.0344543	1.27778
1	GOTERM_MF_FAT	GO:0004298~threonine-type endopeptidase activity	5	1.05708	0.000929591	19173, 26440, 19172, 26442, 19170	286	21	13288	11.0623	0.295748	0.0344543	1.27778
1	GOTERM_BP_FAT	GO:0034470~ncRNA processing	12	2.537	0.000810199	68730, 15108, 27993, 224907, 102462, 67676, 28114, 234734, 109075, 74097, 54364, 64934	303	158	13588	3.40594	0.616357	0.0445961	1.29937
1	GOTERM_BP_FAT	GO:0008033~tRNA processing	8	1.69133	0.000904269	68730, 15108, 224907, 67676, 28114, 234734, 74097, 54364	303	70	13588	5.12513	0.656761	0.0454284	1.44921
1	GOTERM_BP_FAT	GO:0042254~ribosome biogenesis	10	2.11416	0.000871681	67134, 69902, 53414, 27993, 102462, 109075, 16418, 56321, 64934, 66164	303	112	13588	4.00401	0.64327	0.0457728	1.39733
1	GOTERM_CC_FAT	GO:0046540~U4/U6 x U5 tri-snRNP complex	3	0.634249	0.00557631	68988, 67678, 27756	304	5	12504	24.6789	0.828205	0.0490818	7.25168
2	GOTERM_CC_FAT	GO:0031090~organelle membrane	33	8.0292	4.87721e-06	67843, 27376, 14950, 56325, 230379, 66059, 16905, 14933, 407785, 18125, 66169, 67819, 30055, 66495, 14042, 13855, 67952, 66594, 230935, 15108, 12068, 67758, 380664, 107650, 72993, 72084, 17974, 17995, 239827, 13072, 72404, 66116, 55981	211	809	12504	2.41731	0.00120882	0.00120882	0.00632778
2	GOTERM_CC_FAT	GO:0012505~endomembrane system	23	5.59611	9.59521e-05	67843, 72124, 14950, 56325, 67758, 12068, 230379, 66059, 380664, 107650, 16905, 18125, 67819, 72084, 18226, 17974, 239827, 14042, 13855, 23885, 319817, 269113, 55981	211	535	12504	2.54765	0.0235163	0.0118281	0.124422
2	GOTERM_CC_FAT	GO:0044429~mitochondrial part	22	5.3528	0.000198401	64658, 15108, 27376, 64659, 66493, 94065, 107650, 14933, 192289, 407785, 18125, 66169, 30055, 107733, 66495, 17995, 13072, 66116, 67952, 66594, 12261, 230935	211	524	12504	2.48804	0.0480172	0.016269	0.25711
2	KEGG_PATHWAY	mmu05010:Alzheimer's disease	12	2.91971	0.00016829	70316, 20617, 407785, 18125, 15108, 56637, 66495, 17995, 14814, 66594, 19055, 18795	95	182	5738	3.98242	0.019829	0.019829	0.192723
2	GOTERM_CC_FAT	GO:0016581~NuRD complex	4	0.973236	0.000513648	72993, 245688, 116870, 19646	211	10	12504	23.7043	0.119634	0.0313524	0.664389
2	GOTERM_CC_FAT	GO:0031975~envelope	21	5.10949	0.000805311	72124, 15108, 27376, 380664, 107650, 16905, 14933, 407785, 18125, 18226, 66169, 30055, 66495, 17995, 23885, 13072, 66116, 269113, 67952, 66594, 230935	211	542	12504	2.29608	0.181104	0.0327513	1.03983
2	GOTERM_CC_FAT	GO:0005789~endoplasmic reticulum membrane	10	2.43309	0.00105868	67819, 72084, 14950, 56325, 67758, 239827, 14042, 230379, 66059, 55981	211	152	12504	3.89873	0.231021	0.0368319	1.36491
2	GOTERM_CC_FAT	GO:0031967~organelle envelope	21	5.10949	0.00076935	72124, 15108, 27376, 380664, 107650, 16905, 14933, 407785, 18125, 18226, 66169, 30055, 66495, 17995, 23885, 13072, 66116, 269113, 67952, 66594, 230935	211	540	12504	2.30458	0.173762	0.037455	0.993611
2	GOTERM_CC_FAT	GO:0042175~nuclear envelope-endoplasmic reticulum network	10	2.43309	0.00151595	67819, 72084, 14950, 56325, 67758, 239827, 14042, 230379, 66059, 55981	211	160	12504	3.70379	0.313562	0.0459412	1.94912
3	GOTERM_BP_FAT	GO:0006091~generation of precursor metabolites and energy	47	8.10345	9.65657e-23	226646, 66416, 56451, 52837, 595136, 11651, 66218, 27425, 66414, 407785, 69875, 66144, 66108, 18597, 12974, 67003, 66495, 67680, 66046, 13063, 28080, 71679, 66594, 19046, 66576, 11946, 56551, 17449, 53382, 73834, 13382, 20916, 11951, 11950, 56421, 67530, 104130, 17995, 68194, 17992, 74185, 11958, 67942, 11957, 225887, 66945, 68197	411	261	13588	5.95348	1.54891e-19	1.54891e-19	1.61748e-19
3	KEGG_PATHWAY	mmu00190:Oxidative phosphorylation	33	5.68966	2.08592e-20	226646, 66416, 595136, 66218, 27425, 407785, 69875, 66144, 66108, 67003, 66495, 67680, 66046, 71679, 28080, 66576, 66594, 11946, 66290, 73834, 11951, 11950, 67530, 57423, 17995, 68194, 17992, 11958, 67942, 225887, 11957, 66945, 68197	186	130	5738	7.83102	2.64911e-18	2.64911e-18	2.41905e-17
3	GOTERM_CC_FAT	GO:0031975~envelope	61	10.5172	3.84426e-18	226646, 66437, 595136, 67863, 219135, 66272, 68585, 407785, 69875, 66075, 18226, 14719, 67003, 23897, 66576, 11946, 76614, 21917, 11951, 11950, 67530, 104130, 270076, 57423, 17995, 68194, 17992, 11958, 11957, 66945, 68197, 66416, 56451, 110379, 66218, 27425, 66414, 16211, 109754, 28185, 20930, 12034, 66108, 67500, 66495, 67680, 75826, 66046, 18141, 28080, 71679, 66594, 66629, 77053, 14084, 71752,…	392	542	12504	3.58999	1.46851e-15	4.89503e-16	5.32606e-15
3	GOTERM_CC_FAT	GO:0044429~mitochondrial part	60	10.3448	3.36579e-18	226646, 66437, 595136, 94064, 67863, 66272, 407785, 83945, 69875, 66075, 65111, 14719, 67003, 66576, 11946, 76614, 13382, 17713, 11951, 11950, 67530, 104130, 270076, 57423, 17995, 68194, 17992, 11958, 68537, 11957, 66945, 68197, 64656, 66416, 56451, 66218, 27425, 66414, 109754, 28185, 20930, 12034, 66108, 12974, 18597, 66495, 67680, 66046, 13063, 28080, 71679, 66629, 66594, 71752, 67554, 75734, 2…	392	524	12504	3.65244	1.28573e-15	6.42866e-16	4.66316e-15
3	GOTERM_CC_FAT	GO:0031967~organelle envelope	61	10.5172	3.21499e-18	226646, 66437, 595136, 67863, 219135, 66272, 68585, 407785, 69875, 66075, 18226, 14719, 67003, 23897, 66576, 11946, 76614, 21917, 11951, 11950, 67530, 104130, 270076, 57423, 17995, 68194, 17992, 11958, 11957, 66945, 68197, 66416, 56451, 110379, 66218, 27425, 66414, 16211, 109754, 28185, 20930, 12034, 66108, 67500, 66495, 67680, 75826, 66046, 18141, 28080, 71679, 66594, 66629, 77053, 14084, 71752,…	392	540	12504	3.60329	1.22812e-15	1.22812e-15	4.45423e-15
3	KEGG_PATHWAY	mmu05012:Parkinson's disease	30	5.17241	5.23124e-17	226646, 66416, 595136, 66218, 50873, 22195, 407785, 66108, 67003, 66495, 67680, 66046, 13063, 71679, 28080, 66576, 66594, 11946, 57320, 11951, 11950, 67530, 17995, 68194, 17992, 225887, 11957, 67942, 66945, 68197	186	133	5738	6.95853	6.64367e-15	3.32184e-15	6.0667e-14
3	GOTERM_CC_FAT	GO:0019866~organelle inner membrane	44	7.58621	1.21354e-16	226646, 66416, 56451, 595136, 66218, 27425, 66414, 67863, 109754, 20930, 407785, 69875, 66075, 66108, 12034, 14719, 67003, 66495, 67680, 66046, 28080, 71679, 66594, 66576, 11946, 76614, 77053, 71752, 67554, 21856, 74143, 11951, 11950, 67530, 270076, 104130, 57423, 17995, 68194, 17992, 11958, 11957, 66945, 68197	392	312	12504	4.49843	4.24105e-14	8.43769e-15	1.55431e-13
3	GOTERM_CC_FAT	GO:0005743~mitochondrial inner membrane	43	7.41379	9.70277e-17	226646, 66416, 56451, 595136, 66218, 27425, 66414, 67863, 109754, 20930, 407785, 69875, 66075, 66108, 12034, 14719, 67003, 66495, 67680, 66046, 28080, 71679, 66594, 66576, 11946, 76614, 71752, 67554, 21856, 74143, 11951, 11950, 67530, 270076, 104130, 57423, 17995, 68194, 17992, 11958, 11957, 66945, 68197	392	296	12504	4.63383	4.24105e-14	1.05471e-14	1.55431e-13
3	GOTERM_CC_FAT	GO:0031966~mitochondrial membrane	47	8.10345	5.5629e-16	226646, 66416, 56451, 66437, 595136, 66218, 27425, 66414, 67863, 109754, 66272, 28185, 20930, 407785, 69875, 66075, 66108, 12034, 14719, 67003, 66495, 67680, 66046, 28080, 71679, 66594, 66576, 11946, 76614, 71752, 67554, 75734, 21856, 74143, 11951, 11950, 67530, 270076, 104130, 57423, 17995, 68194, 17992, 11958, 11957, 66945, 68197	392	368	12504	4.07392	2.12053e-13	3.53051e-14	7.66054e-13
3	GOTERM_CC_FAT	GO:0005739~mitochondrion	97	16.7241	9.12428e-16	226646, 70047, 66272, 69875, 67003, 14719, 66576, 11946, 15526, 382985, 20916, 17713, 67636, 11951, 11950, 67530, 170760, 56748, 17995, 19156, 17992, 11958, 11957, 68537, 66383, 67044, 13167, 11757, 67707, 15925, 109754, 20930, 224904, 12034, 18597, 12974, 66092, 66046, 66594, 56551, 246703, 12468, 71752, 18477, 13030, 433771, 66437, 595136, 94064, 108147, 67863, 20280, 407785, 83945, 66075, 6511…	392	1322	12504	2.34047	3.39284e-13	4.85167e-14	1.23235e-12
3	GOTERM_CC_FAT	GO:0005740~mitochondrial envelope	48	8.27586	1.1823e-15	226646, 66416, 56451, 66437, 595136, 66218, 27425, 66414, 67863, 109754, 66272, 28185, 20930, 407785, 69875, 66075, 66108, 12034, 14719, 67003, 66495, 67680, 66046, 28080, 71679, 66594, 66629, 66576, 11946, 76614, 71752, 67554, 75734, 21856, 74143, 11951, 11950, 67530, 270076, 104130, 57423, 17995, 68194, 17992, 11958, 11957, 66945, 68197	392	391	12504	3.91586	4.66516e-13	5.82867e-14	1.68754e-12
3	GOTERM_CC_FAT	GO:0070469~respiratory chain	21	3.62069	3.82174e-15	226646, 66416, 595136, 66218, 66414, 407785, 69875, 66108, 67530, 104130, 67003, 66495, 17995, 68194, 17992, 13063, 66046, 225887, 66576, 66594, 68197	392	65	12504	10.3055	1.44196e-12	1.60205e-13	5.22915e-12
3	GOTERM_BP_FAT	GO:0022900~electron transport chain	27	4.65517	2.28262e-16	226646, 66416, 52837, 595136, 66218, 66414, 407785, 69875, 66108, 67003, 66495, 67680, 66046, 13063, 66576, 66594, 56551, 53382, 13382, 67530, 104130, 68194, 17995, 17992, 225887, 66945, 68197	411	112	13588	7.97002	3.5616e-13	1.7808e-13	3.77476e-13
3	KEGG_PATHWAY	mmu05016:Huntington's disease	31	5.34483	5.93434e-14	226646, 66416, 595136, 66218, 407785, 20022, 66108, 67003, 66495, 67680, 66046, 13063, 71679, 28080, 66576, 66594, 11946, 69654, 11951, 11950, 19712, 67530, 17995, 68194, 17992, 67942, 20683, 225887, 11957, 66945, 68197	186	183	5738	5.22587	7.54341e-12	2.51443e-12	6.88782e-11
3	KEGG_PATHWAY	mmu05010:Alzheimer's disease	30	5.17241	3.48825e-13	226646, 66416, 595136, 66218, 15925, 407785, 66108, 56637, 67003, 66495, 67680, 66046, 13063, 71679, 28080, 66576, 66594, 11946, 56398, 11951, 11950, 67530, 17995, 68194, 17992, 67942, 225887, 11957, 66945, 68197	186	182	5738	5.08508	4.43017e-11	1.10754e-11	4.04543e-10
3	GOTERM_CC_FAT	GO:0031090~organelle membrane	65	11.2069	3.63894e-12	27061, 66884, 226646, 66437, 595136, 50797, 67863, 68585, 66272, 407785, 69875, 66075, 65113, 67166, 14719, 67003, 23897, 13855, 66576, 11946, 81003, 56334, 76614, 66290, 11951, 11950, 67530, 104130, 270076, 57423, 17995, 68194, 17992, 235574, 11958, 11957, 56486, 66945, 68197, 66416, 56451, 66218, 27425, 66414, 109754, 28185, 20930, 12034, 66108, 66495, 67680, 66046, 71679, 28080, 66594, 77053, …	392	809	12504	2.56288	1.39009e-09	1.39009e-10	5.04164e-09
3	GOTERM_BP_FAT	GO:0006119~oxidative phosphorylation	17	2.93103	4.87309e-12	66416, 73834, 27425, 13382, 11951, 11950, 66144, 67530, 11958, 71679, 67942, 28080, 11957, 66576, 66594, 68197, 11946	411	56	13588	10.0363	7.81646e-09	2.60549e-09	8.16248e-09
3	GOTERM_BP_FAT	GO:0015031~protein transport	54	9.31034	3.4899e-11	66884, 27061, 27681, 19349, 68505, 50797, 66272, 268451, 65114, 69875, 56433, 56637, 18226, 22630, 22084, 20813, 15526, 56334, 68365, 218035, 53421, 18457, 68090, 17713, 18634, 11765, 56486, 110379, 66397, 97112, 22343, 17113, 14569, 16211, 59021, 66914, 28084, 56418, 75826, 18141, 347722, 11842, 54401, 11840, 213827, 103573, 218811, 21856, 30930, 24067, 20844, 19330, 17938, 22627	411	651	13588	2.74237	5.5978e-08	1.39945e-08	5.8456e-08
3	GOTERM_BP_FAT	GO:0045184~establishment of protein localization	54	9.31034	4.57872e-11	66884, 27061, 27681, 19349, 68505, 50797, 66272, 268451, 65114, 69875, 56433, 56637, 18226, 22630, 22084, 20813, 15526, 56334, 68365, 218035, 53421, 18457, 68090, 17713, 18634, 11765, 56486, 110379, 66397, 97112, 22343, 17113, 14569, 16211, 59021, 66914, 28084, 56418, 75826, 18141, 347722, 11842, 54401, 11840, 213827, 103573, 218811, 21856, 30930, 24067, 20844, 19330, 17938, 22627	411	656	13588	2.72147	7.34428e-08	1.46886e-08	7.6694e-08
3	GOTERM_BP_FAT	GO:0008104~protein localization	58	10	1.03175e-10	66884, 27061, 27681, 19349, 68505, 50797, 66272, 268451, 65114, 69875, 56433, 22630, 18226, 56637, 22084, 20813, 15526, 56334, 68365, 218035, 53421, 12387, 18457, 68090, 17713, 18634, 11765, 56486, 19684, 110379, 66397, 97112, 22343, 17113, 14569, 16211, 59021, 66914, 28084, 56418, 12540, 75826, 18141, 347722, 11842, 54401, 14084, 11840, 213827, 103573, 218811, 21856, 30930, 24067, 20844, 19330, …	411	753	13588	2.54652	1.65493e-07	2.75822e-08	1.72819e-07
3	GOTERM_CC_FAT	GO:0045259~proton-transporting ATP synthase complex	10	1.72414	1.82658e-09	11951, 11950, 57423, 27425, 11958, 71679, 28080, 67942, 11957, 11946	392	19	12504	16.7884	6.97754e-07	6.34322e-08	2.53065e-06
3	GOTERM_CC_FAT	GO:0005829~cytosol	46	7.93103	2.78714e-09	227800, 22222, 14976, 11651, 26440, 14815, 13001, 14783, 66537, 109754, 83945, 66914, 26445, 56637, 215449, 19182, 56418, 56455, 53872, 13063, 110157, 56612, 17449, 12468, 68365, 347722, 19921, 23996, 14084, 11840, 66290, 58810, 20088, 30930, 217737, 20402, 24068, 56421, 433749, 18634, 74006, 12462, 56748, 12461, 19175, 19170	392	549	12504	2.67269	1.06469e-06	8.8724e-08	3.86146e-06
3	GOTERM_CC_FAT	GO:0016469~proton-transporting two-sector ATPase complex	13	2.24138	3.49903e-09	66290, 73834, 27425, 11951, 11950, 66144, 57423, 11958, 28080, 11957, 67942, 71679, 11946	392	42	12504	9.87318	1.33663e-06	1.02818e-07	4.84776e-06
3	GOTERM_CC_FAT	GO:0045263~proton-transporting ATP synthase complex, coupling factor F(o)	8	1.37931	4.04328e-08	11951, 11950, 57423, 27425, 11958, 71679, 67942, 11957	392	13	12504	19.6295	1.54452e-05	1.10324e-06	5.60179e-05
3	GOTERM_MF_FAT	GO:0015078~hydrogen ion transmembrane transporter activity	16	2.75862	8.31797e-09	66290, 73834, 27425, 20930, 11951, 11950, 66144, 67530, 11958, 71679, 28080, 11957, 67942, 66576, 66594, 11946	378	82	13288	6.85921	4.04252e-06	4.04252e-06	1.19304e-05
3	GOTERM_MF_FAT	GO:0015077~monovalent inorganic cation transmembrane transporter activity	16	2.75862	1.9306e-08	66290, 73834, 27425, 20930, 11951, 11950, 66144, 67530, 11958, 71679, 28080, 11957, 67942, 66576, 66594, 11946	378	87	13288	6.465	9.38266e-06	4.69134e-06	2.76904e-05
3	GOTERM_BP_FAT	GO:0015992~proton transport	13	2.24138	3.35857e-08	66290, 73834, 27425, 11951, 11950, 66144, 57423, 11958, 28080, 11957, 67942, 71679, 11946	411	52	13588	8.26521	5.38701e-05	6.73392e-06	5.62563e-05
3	GOTERM_BP_FAT	GO:0046907~intracellular transport	37	6.37931	3.17795e-08	66884, 27061, 110379, 66397, 97112, 19349, 50797, 17113, 16211, 66272, 59021, 56433, 22630, 56637, 22084, 56418, 12540, 18141, 20813, 15526, 53421, 218035, 54401, 213827, 103573, 68092, 218811, 21856, 30930, 14105, 17713, 24067, 20844, 18634, 11765, 235574, 22627	411	431	13588	2.83817	5.0973e-05	7.28202e-06	5.32309e-05
3	GOTERM_BP_FAT	GO:0006818~hydrogen transport	13	2.24138	4.2246e-08	66290, 73834, 27425, 11951, 11950, 66144, 57423, 11958, 28080, 11957, 67942, 71679, 11946	411	53	13588	8.10926	6.77603e-05	7.52914e-06	7.07623e-05
3	GOTERM_BP_FAT	GO:0015985~energy coupled proton transport, down electrochemical gradient	11	1.89655	9.42041e-08	11951, 11950, 66144, 27425, 73834, 11958, 71679, 28080, 67942, 11957, 11946	411	37	13588	9.82889	0.000151092	1.51102e-05	0.000157792
3	GOTERM_BP_FAT	GO:0015986~ATP synthesis coupled proton transport	11	1.89655	9.42041e-08	11951, 11950, 66144, 27425, 73834, 11958, 71679, 28080, 67942, 11957, 11946	411	37	13588	9.82889	0.000151092	1.51102e-05	0.000157792
3	GOTERM_CC_FAT	GO:0031974~membrane-enclosed lumen	68	11.7241	7.86743e-07	27681, 74195, 15251, 21372, 94064, 54451, 30923, 22083, 83945, 15259, 212880, 56637, 26754, 65111, 14719, 22110, 15387, 18451, 12387, 68092, 13207, 13205, 13382, 19646, 19826, 20402, 14105, 64934, 17713, 13018, 19712, 237730, 270076, 93684, 68537, 230753, 67039, 64656, 70998, 97112, 51796, 74035, 20022, 21399, 66108, 67500, 12974, 18597, 56070, 20220, 13063, 193116, 66629, 57261, 77053, 18139, 10…	392	1174	12504	1.84758	0.000300491	2.00355e-05	0.00108999
3	GOTERM_MF_FAT	GO:0000166~nucleotide binding	102	17.5862	1.64705e-07	226646, 19877, 26905, 19349, 20383, 70047, 228012, 27406, 67166, 56637, 56298, 110157, 11946, 15526, 81003, 20817, 68365, 68092, 14105, 20916, 17713, 26563, 320720, 18213, 17995, 230753, 67039, 66397, 22209, 11651, 16563, 15925, 59021, 215449, 226414, 13681, 22589, 12468, 347722, 11842, 23996, 20872, 11840, 16882, 56422, 56421, 16558, 19330, 12462, 12461, 67059, 19134, 76626, 15568, 13494, 15467,…	378	2183	13288	1.64253	8.00432e-05	2.66818e-05	0.000236234
3	GOTERM_CC_FAT	GO:0000502~proteasome complex	12	2.06897	1.47465e-06	21762, 22222, 26445, 23996, 26440, 19182, 19181, 19175, 66537, 19185, 230249, 19170	392	58	12504	6.59958	0.000563159	3.52067e-05	0.00204305
3	GOTERM_CC_FAT	GO:0070013~intracellular organelle lumen	65	11.2069	2.04353e-06	27681, 74195, 15251, 21372, 94064, 54451, 30923, 22083, 83945, 15259, 56637, 26754, 65111, 212880, 14719, 22110, 15387, 18451, 12387, 68092, 13207, 13205, 13382, 19646, 19826, 20402, 14105, 64934, 17713, 13018, 19712, 237730, 270076, 93684, 68537, 230753, 67039, 64656, 70998, 97112, 51796, 74035, 20022, 21399, 66108, 12974, 18597, 56070, 20220, 13063, 193116, 57261, 77053, 18139, 103573, 67154, 2…	392	1133	12504	1.82998	0.000780326	4.59184e-05	0.00283119
3	GOTERM_CC_FAT	GO:0043233~organelle lumen	65	11.2069	2.23679e-06	27681, 74195, 15251, 21372, 94064, 54451, 30923, 22083, 83945, 15259, 56637, 26754, 65111, 212880, 14719, 22110, 15387, 18451, 12387, 68092, 13207, 13205, 13382, 19646, 19826, 20402, 14105, 64934, 17713, 13018, 19712, 237730, 270076, 93684, 68537, 230753, 67039, 64656, 70998, 97112, 51796, 74035, 20022, 21399, 66108, 12974, 18597, 56070, 20220, 13063, 193116, 57261, 77053, 18139, 103573, 67154, 2…	392	1136	12504	1.82515	0.000854089	4.74685e-05	0.00309893
3	GOTERM_BP_FAT	GO:0034220~ion transmembrane transport	11	1.89655	3.4768e-07	11951, 11950, 66144, 27425, 73834, 11958, 71679, 28080, 67942, 11957, 11946	411	42	13588	8.65879	0.000557523	5.06967e-05	0.000582364
3	GOTERM_BP_FAT	GO:0034613~cellular protein localization	28	4.82759	3.88474e-07	27061, 66397, 19349, 50797, 17113, 16211, 66272, 59021, 56637, 22630, 22084, 12540, 20813, 15526, 53421, 218035, 54401, 12387, 213827, 103573, 218811, 21856, 17713, 24067, 20844, 18634, 11765, 22627	411	299	13588	3.096	0.000622918	5.19247e-05	0.000650694
3	GOTERM_BP_FAT	GO:0070727~cellular macromolecule localization	28	4.82759	4.44728e-07	27061, 66397, 19349, 50797, 17113, 16211, 66272, 59021, 56637, 22630, 22084, 12540, 20813, 15526, 53421, 218035, 54401, 12387, 213827, 103573, 218811, 21856, 17713, 24067, 20844, 18634, 11765, 22627	411	301	13588	3.07543	0.000713089	5.48711e-05	0.00074492
3	GOTERM_CC_FAT	GO:0033177~proton-transporting two-sector ATPase complex, proton-transporting domain	8	1.37931	3.14726e-06	11951, 11950, 57423, 27425, 11958, 71679, 67942, 11957	392	22	12504	11.5993	0.00120153	6.32747e-05	0.00436031
3	GOTERM_MF_FAT	GO:0022890~inorganic cation transmembrane transporter activity	17	2.93103	5.94195e-07	66290, 73834, 27425, 20930, 11951, 11950, 66144, 67530, 235574, 11958, 71679, 28080, 11957, 67942, 66576, 66594, 11946	378	127	13288	4.70558	0.000288737	7.21921e-05	0.000852245
3	GOTERM_BP_FAT	GO:0009152~purine ribonucleotide biosynthetic process	16	2.75862	7.24548e-07	73834, 27425, 14450, 108147, 11951, 11950, 66144, 57423, 19889, 235574, 11958, 71679, 28080, 11957, 67942, 11946	411	107	13588	4.94368	0.0011615	8.30091e-05	0.00121362
3	GOTERM_BP_FAT	GO:0006886~intracellular protein transport	26	4.48276	9.95239e-07	27061, 66397, 19349, 50797, 17113, 16211, 66272, 59021, 56637, 22630, 22084, 20813, 15526, 53421, 218035, 54401, 213827, 103573, 218811, 21856, 17713, 24067, 20844, 18634, 11765, 22627	411	276	13588	3.11443	0.00159509	0.000106419	0.00166702
3	GOTERM_BP_FAT	GO:0009260~ribonucleotide biosynthetic process	16	2.75862	1.17016e-06	73834, 27425, 14450, 108147, 11951, 11950, 66144, 57423, 19889, 235574, 11958, 71679, 28080, 11957, 67942, 11946	411	111	13588	4.76552	0.00187517	0.000117301	0.00196
3	GOTERM_BP_FAT	GO:0045333~cellular respiration	12	2.06897	1.25448e-06	17449, 66416, 56451, 67530, 12974, 67680, 13382, 66594, 66945, 66576, 68197, 20916	411	59	13588	6.72424	0.00201016	0.000118357	0.00210124
3	GOTERM_BP_FAT	GO:0015980~energy derivation by oxidation of organic compounds	15	2.58621	1.34782e-06	17449, 66416, 56451, 11651, 13382, 20916, 67530, 12974, 67680, 74185, 66945, 66576, 66594, 19046, 68197	411	98	13588	5.06033	0.00215957	0.000120098	0.00225758
3	GOTERM_CC_FAT	GO:0042470~melanosome	13	2.24138	1.23639e-05	67878, 11749, 54401, 19349, 18477, 13030, 12330, 59021, 19027, 13002, 13830, 22627, 16783	392	85	12504	4.87851	0.00471189	0.000236123	0.0171282
3	GOTERM_CC_FAT	GO:0048770~pigment granule	13	2.24138	1.23639e-05	67878, 11749, 54401, 19349, 18477, 13030, 12330, 59021, 19027, 13002, 13830, 22627, 16783	392	85	12504	4.87851	0.00471189	0.000236123	0.0171282
3	GOTERM_BP_FAT	GO:0009150~purine ribonucleotide metabolic process	16	2.75862	2.85939e-06	73834, 27425, 14450, 108147, 11951, 11950, 66144, 57423, 19889, 235574, 11958, 71679, 28080, 11957, 67942, 11946	411	119	13588	4.44515	0.00457596	0.000241364	0.00478938
3	GOTERM_CC_FAT	GO:0000276~mitochondrial proton-transporting ATP synthase complex, coupling factor F(o)	5	0.862069	1.34386e-05	11950, 27425, 11958, 71679, 11957	392	6	12504	26.5816	0.00512042	0.000244426	0.018617
3	GOTERM_CC_FAT	GO:0044455~mitochondrial membrane part	10	1.72414	1.76744e-05	74143, 226646, 76614, 11950, 66437, 27425, 11958, 71679, 21856, 11957	392	49	12504	6.50979	0.00672893	0.000306847	0.0244843
3	GOTERM_MF_FAT	GO:0050136~NADH dehydrogenase (quinone) activity	8	1.37931	3.19175e-06	226646, 66416, 66495, 17995, 68194, 225887, 66414, 68197	378	24	13288	11.7178	0.00154999	0.000310191	0.0045778
3	GOTERM_MF_FAT	GO:0008137~NADH dehydrogenase (ubiquinone) activity	8	1.37931	3.19175e-06	226646, 66416, 66495, 17995, 68194, 225887, 66414, 68197	378	24	13288	11.7178	0.00154999	0.000310191	0.0045778
3	GOTERM_MF_FAT	GO:0003954~NADH dehydrogenase activity	8	1.37931	3.19175e-06	226646, 66416, 66495, 17995, 68194, 225887, 66414, 68197	378	24	13288	11.7178	0.00154999	0.000310191	0.0045778
3	GOTERM_BP_FAT	GO:0009201~ribonucleoside triphosphate biosynthetic process	14	2.41379	4.12372e-06	73834, 27425, 11951, 11950, 66144, 57423, 19889, 235574, 11958, 28080, 11957, 67942, 71679, 11946	411	93	13588	4.9769	0.00659264	0.000330668	0.00690704
3	GOTERM_BP_FAT	GO:0009206~purine ribonucleoside triphosphate biosynthetic process	14	2.41379	4.12372e-06	73834, 27425, 11951, 11950, 66144, 57423, 19889, 235574, 11958, 28080, 11957, 67942, 71679, 11946	411	93	13588	4.9769	0.00659264	0.000330668	0.00690704
3	GOTERM_BP_FAT	GO:0009145~purine nucleoside triphosphate biosynthetic process	14	2.41379	4.65661e-06	73834, 27425, 11951, 11950, 66144, 57423, 19889, 235574, 11958, 28080, 11957, 67942, 71679, 11946	411	94	13588	4.92395	0.00744139	0.000355614	0.00779956
3	GOTERM_BP_FAT	GO:0009259~ribonucleotide metabolic process	16	2.75862	5.3103e-06	73834, 27425, 14450, 108147, 11951, 11950, 66144, 57423, 19889, 235574, 11958, 71679, 28080, 11957, 67942, 11946	411	125	13588	4.23179	0.00848157	0.000370268	0.00889442
3	KEGG_PATHWAY	mmu03050:Proteasome	10	1.72414	1.46396e-05	21762, 26445, 23996, 26440, 19182, 19181, 19175, 66537, 19185, 19170	186	47	5738	6.56372	0.00185751	0.000371779	0.0169763
3	GOTERM_BP_FAT	GO:0009142~nucleoside triphosphate biosynthetic process	14	2.41379	5.2495e-06	73834, 27425, 11951, 11950, 66144, 57423, 19889, 235574, 11958, 28080, 11957, 67942, 71679, 11946	411	95	13588	4.87212	0.00838487	0.000382664	0.00879259
3	GOTERM_BP_FAT	GO:0006754~ATP biosynthetic process	13	2.24138	5.95145e-06	73834, 27425, 11951, 11950, 66144, 57423, 11958, 235574, 28080, 11957, 67942, 71679, 11946	411	82	13588	5.24135	0.00950073	0.000397677	0.00996825
3	GOTERM_CC_FAT	GO:0005753~mitochondrial proton-transporting ATP synthase complex	5	0.862069	3.05816e-05	11950, 27425, 11958, 71679, 11957	392	7	12504	22.7843	0.0116144	0.000507799	0.0423612
3	GOTERM_MF_FAT	GO:0017076~purine nucleotide binding	85	14.6552	8.45516e-06	19877, 26905, 13494, 19349, 15467, 70047, 228012, 27406, 12305, 15259, 67166, 104303, 212880, 56298, 56637, 19182, 16589, 19181, 56055, 110157, 11946, 224742, 15526, 81003, 20817, 68365, 235072, 22214, 13207, 13205, 20480, 13382, 22385, 20916, 17713, 26563, 433749, 320720, 18213, 270076, 216965, 235574, 66945, 230753, 56451, 66397, 22209, 11651, 81702, 16563, 14450, 15925, 22195, 59021, 12325, 21…	378	1871	13288	1.59703	0.00410079	0.00058686	0.0121265
3	GOTERM_BP_FAT	GO:0009141~nucleoside triphosphate metabolic process	15	2.58621	9.22844e-06	382985, 73834, 27425, 11951, 11950, 66144, 57423, 19889, 235574, 11958, 71679, 28080, 11957, 67942, 11946	411	115	13588	4.31228	0.0146935	0.000591924	0.0154566
3	GOTERM_MF_FAT	GO:0016655~oxidoreductase activity, acting on NADH or NADPH, quinone or similar compound as acceptor	8	1.37931	7.6085e-06	226646, 66416, 66495, 17995, 68194, 225887, 66414, 68197	378	27	13288	10.4158	0.00369092	0.000616101	0.0109122
3	GOTERM_BP_FAT	GO:0009205~purine ribonucleoside triphosphate metabolic process	14	2.41379	1.04215e-05	73834, 27425, 11951, 11950, 66144, 57423, 19889, 235574, 11958, 28080, 11957, 67942, 71679, 11946	411	101	13588	4.58269	0.0165773	0.000642726	0.0174547
3	GOTERM_BP_FAT	GO:0009199~ribonucleoside triphosphate metabolic process	14	2.41379	1.16223e-05	73834, 27425, 11951, 11950, 66144, 57423, 19889, 235574, 11958, 28080, 11957, 67942, 71679, 11946	411	102	13588	4.53776	0.0184696	0.000690216	0.0194656
3	GOTERM_MF_FAT	GO:0016651~oxidoreductase activity, acting on NADH or NADPH	10	1.72414	1.14756e-05	226646, 66416, 66495, 17995, 68194, 13382, 225887, 66414, 68197, 109754	378	51	13288	6.89283	0.00556166	0.000696905	0.0164581
3	KEGG_PATHWAY	mmu00020:Citrate cycle (TCA cycle)	8	1.37931	4.40871e-05	17449, 56451, 18597, 12974, 67680, 13382, 66945, 20916	186	31	5738	7.96115	0.00558354	0.000799564	0.0511161
3	KEGG_PATHWAY	mmu03040:Spliceosome	15	2.58621	3.89074e-05	15387, 72654, 68092, 13207, 20383, 51810, 14105, 66354, 319322, 212880, 57905, 56070, 193116, 81898, 67039	186	124	5738	3.73179	0.00492915	0.000823218	0.0451119
3	GOTERM_CC_FAT	GO:0030529~ribonucleoprotein complex	32	5.51724	5.34825e-05	76626, 64656, 67707, 94064, 51810, 66354, 51796, 57905, 65111, 18226, 17846, 67025, 193116, 18141, 20813, 15387, 78523, 19921, 13207, 103573, 56403, 20088, 20901, 24068, 64934, 24067, 18813, 237730, 67308, 68537, 81898, 19134	392	462	12504	2.20938	0.0202236	0.000850923	0.0740722
3	GOTERM_BP_FAT	GO:0006164~purine nucleotide biosynthetic process	16	2.75862	1.63584e-05	73834, 27425, 14450, 108147, 11951, 11950, 66144, 57423, 19889, 235574, 11958, 71679, 28080, 11957, 67942, 11946	411	137	13588	3.86112	0.0258978	0.000904385	0.0273968
3	GOTERM_BP_FAT	GO:0046034~ATP metabolic process	13	2.24138	1.58299e-05	73834, 27425, 11951, 11950, 66144, 57423, 11958, 235574, 28080, 11957, 67942, 71679, 11946	411	90	13588	4.77545	0.0250717	0.000906425	0.0265119
3	GOTERM_BP_FAT	GO:0009144~purine nucleoside triphosphate metabolic process	14	2.41379	1.77303e-05	73834, 27425, 11951, 11950, 66144, 57423, 19889, 235574, 11958, 28080, 11957, 67942, 71679, 11946	411	106	13588	4.36652	0.0280391	0.00094754	0.0296942
3	GOTERM_MF_FAT	GO:0032555~purine ribonucleotide binding	80	13.7931	3.55947e-05	19877, 26905, 13494, 19349, 15467, 70047, 228012, 27406, 12305, 15259, 67166, 104303, 212880, 56637, 56298, 19182, 16589, 19181, 56055, 110157, 11946, 224742, 15526, 81003, 20817, 68365, 235072, 22214, 13207, 13205, 20480, 22385, 20916, 26563, 433749, 320720, 18213, 216965, 235574, 230753, 56451, 66397, 22209, 11651, 81702, 16563, 14450, 15925, 22195, 59021, 12325, 215449, 85305, 226414, 12540, 1…	378	1796	13288	1.56585	0.0171505	0.0019203	0.051041
3	GOTERM_MF_FAT	GO:0032553~ribonucleotide binding	80	13.7931	3.55947e-05	19877, 26905, 13494, 19349, 15467, 70047, 228012, 27406, 12305, 15259, 67166, 104303, 212880, 56637, 56298, 19182, 16589, 19181, 56055, 110157, 11946, 224742, 15526, 81003, 20817, 68365, 235072, 22214, 13207, 13205, 20480, 22385, 20916, 26563, 433749, 320720, 18213, 216965, 235574, 230753, 56451, 66397, 22209, 11651, 81702, 16563, 14450, 15925, 22195, 59021, 12325, 215449, 85305, 226414, 12540, 1…	378	1796	13288	1.56585	0.0171505	0.0019203	0.051041
3	GOTERM_CC_FAT	GO:0031981~nuclear lumen	48	8.27586	0.000223824	27681, 70998, 97112, 74195, 21372, 15251, 54451, 30923, 22083, 51796, 74035, 15259, 20022, 21399, 26754, 56637, 212880, 56070, 20220, 193116, 22110, 57261, 15387, 12387, 77053, 13207, 68092, 18139, 103573, 13205, 67154, 19646, 19826, 20402, 64934, 14105, 24068, 24067, 13018, 18813, 17184, 237730, 19712, 18044, 26374, 18519, 230753, 67039	392	883	12504	1.73398	0.0819562	0.00341456	0.309652
3	GOTERM_BP_FAT	GO:0055114~oxidation reduction	40	6.89655	6.87137e-05	226646, 66416, 11757, 52837, 77951, 595136, 66218, 66414, 109754, 407785, 69875, 66108, 18597, 67003, 66495, 67680, 66046, 13063, 66594, 66576, 56551, 382985, 18451, 17449, 53382, 58810, 18477, 13382, 106529, 11363, 67530, 270076, 104130, 17995, 68194, 17992, 12460, 225887, 66945, 68197	411	672	13588	1.96791	0.104363	0.00354919	0.115034
3	GOTERM_MF_FAT	GO:0005525~GTP binding	25	4.31034	7.34152e-05	56451, 66397, 26905, 19349, 13494, 59021, 67166, 56298, 104303, 215449, 12540, 56055, 81003, 68365, 235072, 347722, 11842, 11840, 74143, 24067, 56422, 433749, 74006, 19330, 67059	378	354	13288	2.48259	0.035052	0.00356175	0.105247
3	GOTERM_BP_FAT	GO:0009165~nucleotide biosynthetic process	17	2.93103	7.49174e-05	382985, 73834, 27425, 14450, 108147, 11951, 11950, 66144, 57423, 19889, 235574, 11958, 71679, 28080, 11957, 67942, 11946	411	174	13588	3.23008	0.113232	0.00374833	0.125413
3	GOTERM_CC_FAT	GO:0005654~nucleoplasm	36	6.2069	0.000275186	27681, 97112, 74195, 21372, 15251, 54451, 30923, 22083, 51796, 15259, 20022, 21399, 26754, 56637, 212880, 20220, 193116, 15387, 12387, 18139, 103573, 68092, 13205, 19646, 19826, 24068, 64934, 14105, 24067, 13018, 26374, 18044, 19712, 18519, 230753, 67039	392	599	12504	1.91707	0.0997974	0.0040355	0.380584
3	GOTERM_MF_FAT	GO:0032561~guanyl ribonucleotide binding	25	4.31034	0.000109448	56451, 66397, 26905, 19349, 13494, 59021, 67166, 56298, 104303, 215449, 12540, 56055, 81003, 68365, 235072, 347722, 11842, 11840, 74143, 24067, 56422, 433749, 74006, 19330, 67059	378	363	13288	2.42104	0.0518046	0.00482421	0.156866
3	GOTERM_MF_FAT	GO:0019001~guanyl nucleotide binding	25	4.31034	0.000109448	56451, 66397, 26905, 19349, 13494, 59021, 67166, 56298, 104303, 215449, 12540, 56055, 81003, 68365, 235072, 347722, 11842, 11840, 74143, 24067, 56422, 433749, 74006, 19330, 67059	378	363	13288	2.42104	0.0518046	0.00482421	0.156866
3	GOTERM_BP_FAT	GO:0006163~purine nucleotide metabolic process	16	2.75862	0.000100514	73834, 27425, 14450, 108147, 11951, 11950, 66144, 57423, 19889, 235574, 11958, 71679, 28080, 11957, 67942, 11946	411	160	13588	3.30608	0.148906	0.00487394	0.168229
3	GOTERM_BP_FAT	GO:0034404~nucleobase, nucleoside and nucleotide biosynthetic process	17	2.93103	0.000104892	382985, 73834, 27425, 14450, 108147, 11951, 11950, 66144, 57423, 19889, 235574, 11958, 71679, 28080, 11957, 67942, 11946	411	179	13588	3.13986	0.154862	0.00493648	0.17555
3	GOTERM_BP_FAT	GO:0034654~nucleobase, nucleoside, nucleotide and nucleic acid biosynthetic process	17	2.93103	0.000104892	382985, 73834, 27425, 14450, 108147, 11951, 11950, 66144, 57423, 19889, 235574, 11958, 71679, 28080, 11957, 67942, 11946	411	179	13588	3.13986	0.154862	0.00493648	0.17555
3	GOTERM_BP_FAT	GO:0007264~small GTPase mediated signal transduction	21	3.62069	0.000111893	81003, 19877, 68365, 347722, 11842, 228359, 11840, 19349, 14569, 66272, 57874, 83945, 16443, 59021, 433749, 67166, 104303, 22630, 215449, 19330, 12540	411	258	13588	2.691	0.164301	0.00511506	0.187257
3	GOTERM_MF_FAT	GO:0051082~unfolded protein binding	10	1.72414	0.000152634	12330, 83945, 12468, 14976, 13002, 12462, 12461, 56612, 14105, 15526	378	70	13288	5.02192	0.0715008	0.00616308	0.218699
3	GOTERM_BP_FAT	GO:0042773~ATP synthesis coupled electron transport	6	1.03448	0.000151092	66416, 67530, 13382, 66594, 66576, 68197	411	18	13588	11.0203	0.215234	0.00670987	0.252779
3	GOTERM_CC_FAT	GO:0016607~nuclear speck	11	1.89655	0.000490567	24067, 22083, 51796, 26374, 212880, 18139, 13205, 193116, 19826, 14105, 67039	392	90	12504	3.89864	0.170923	0.00691828	0.677521
3	GOTERM_BP_FAT	GO:0030163~protein catabolic process	34	5.86207	0.000168128	22222, 22209, 11651, 224170, 67923, 26440, 59008, 20747, 21372, 50873, 22195, 26554, 67955, 67561, 217217, 26445, 17847, 19182, 19181, 56736, 192157, 75826, 56438, 78541, 22214, 23996, 68795, 70093, 22217, 215351, 26374, 54197, 19175, 19170	411	556	13588	2.02171	0.236392	0.0072627	0.281244
3	GOTERM_CC_FAT	GO:0005759~mitochondrial matrix	15	2.58621	0.000596379	64656, 94064, 13382, 11363, 17713, 83945, 65111, 66108, 270076, 12974, 18597, 14719, 93747, 13063, 68537	392	163	12504	2.9354	0.203784	0.00810572	0.823099
3	GOTERM_CC_FAT	GO:0031980~mitochondrial lumen	15	2.58621	0.000596379	64656, 94064, 13382, 11363, 17713, 83945, 65111, 66108, 270076, 12974, 18597, 14719, 93747, 13063, 68537	392	163	12504	2.9354	0.203784	0.00810572	0.823099
3	GOTERM_CC_FAT	GO:0044445~cytosolic part	9	1.55172	0.000732048	12468, 56421, 19921, 14976, 12462, 20088, 12461, 56612, 24068	392	63	12504	4.55685	0.244023	0.00898344	1.00946
3	GOTERM_CC_FAT	GO:0005773~vacuole	17	2.93103	0.00068612	81003, 68365, 66290, 19349, 16563, 13382, 17113, 13030, 67561, 22129, 67166, 75622, 19156, 56700, 56486, 213948, 16783	392	204	12504	2.65816	0.230633	0.00900021	0.946409
3	GOTERM_CC_FAT	GO:0009898~internal side of plasma membrane	21	3.62069	0.000713931	68365, 213827, 50797, 22330, 19298, 18016, 109754, 66272, 14706, 11518, 20844, 433749, 104303, 11765, 170760, 12540, 56418, 19889, 13830, 192157, 19684	392	287	12504	2.334	0.23877	0.00905275	0.984595
3	GOTERM_MF_FAT	GO:0003723~RNA binding	36	6.2069	0.000384412	76626, 15568, 110611, 224170, 81702, 20383, 54451, 70047, 51796, 212880, 17846, 16589, 67025, 20658, 193116, 13681, 20813, 105559, 15387, 66899, 140486, 13207, 103573, 18139, 56403, 68092, 57320, 67579, 13205, 19826, 14105, 24067, 22384, 18813, 17184, 237730	378	672	13288	1.88322	0.17044	0.0142711	0.549947
3	KEGG_PATHWAY	mmu04722:Neurotrophin signaling pathway	13	2.24138	0.000914869	54401, 12929, 11651, 433749, 12325, 56637, 18213, 22630, 215449, 12540, 22627, 109880, 110157	186	130	5738	3.08495	0.10974	0.0144251	1.05585
3	GOTERM_MF_FAT	GO:0031202~RNA splicing factor activity, transesterification mechanism	4	0.689655	0.000425153	51796, 193116, 81898, 14105	378	6	13288	23.4356	0.18671	0.0146536	0.608066
3	GOTERM_MF_FAT	GO:0008135~translation factor activity, nucleic acid binding	11	1.89655	0.000456171	22384, 56422, 21399, 68135, 26905, 21400, 55944, 15467, 13681, 98221, 224045	378	98	13288	3.94579	0.198884	0.0146746	0.652294
3	GOTERM_BP_FAT	GO:0006397~mRNA processing	20	3.44828	0.000385496	15387, 20817, 66899, 56403, 13207, 68092, 20383, 20901, 54451, 19826, 14105, 66354, 51796, 319322, 212880, 57905, 193116, 81898, 19134, 67039	411	262	13588	2.52373	0.461224	0.0161434	0.643752
3	GOTERM_MF_FAT	GO:0003713~transcription coactivator activity	11	1.89655	0.000536288	14976, 26754, 12387, 11792, 58172, 17938, 70465, 18519, 24068, 230753, 66354	378	100	13288	3.86688	0.229493	0.0161621	0.766447
3	GOTERM_MF_FAT	GO:0008134~transcription factor binding	20	3.44828	0.000577914	27681, 14976, 12387, 13207, 13001, 21372, 67154, 12848, 24068, 66354, 15259, 26754, 18226, 11792, 19330, 58172, 17938, 18519, 70465, 230753	378	288	13288	2.44121	0.244932	0.0163905	0.825708
3	GOTERM_MF_FAT	GO:0003712~transcription cofactor activity	15	2.58621	0.000620006	14976, 12387, 13207, 21372, 12848, 24068, 66354, 15259, 26754, 11792, 58172, 17938, 18519, 70465, 230753	378	180	13288	2.92945	0.26023	0.0166059	0.8856
3	GOTERM_CC_FAT	GO:0012505~endomembrane system	31	5.34483	0.0014422	27061, 66884, 110379, 50797, 16211, 219135, 109754, 68585, 16443, 65113, 18226, 67500, 23897, 13855, 75826, 18141, 81003, 56334, 68365, 77053, 11840, 14084, 103573, 218811, 30930, 53618, 21917, 69019, 20014, 235574, 56486	392	535	12504	1.84829	0.423811	0.0170812	1.97969
3	GOTERM_CC_FAT	GO:0016604~nuclear body	13	2.24138	0.00165713	18139, 103573, 13205, 19826, 14105, 51796, 22083, 24067, 15259, 26374, 212880, 193116, 67039	392	142	12504	2.92024	0.469294	0.0190153	2.27158
3	GOTERM_BP_FAT	GO:0006099~tricarboxylic acid cycle	6	1.03448	0.000523928	17449, 56451, 12974, 67680, 66945, 20916	411	23	13588	8.62456	0.568549	0.0213233	0.873972
3	KEGG_PATHWAY	mmu05211:Renal cell carcinoma	9	1.55172	0.00171224	215449, 11651, 12929, 67923, 12540, 15251, 109880, 110157, 56438	186	70	5738	3.96636	0.195586	0.0238922	1.96778
3	GOTERM_BP_FAT	GO:0046356~acetyl-CoA catabolic process	6	1.03448	0.000645567	17449, 56451, 12974, 67680, 66945, 20916	411	24	13588	8.26521	0.645066	0.0249475	1.07585
3	GOTERM_BP_FAT	GO:0042775~mitochondrial ATP synthesis coupled electron transport	5	0.862069	0.000642878	67530, 13382, 66594, 66576, 68197	411	14	13588	11.8074	0.643531	0.025458	1.07139
3	GOTERM_BP_FAT	GO:0006605~protein targeting	13	2.24138	0.000692295	54401, 103573, 16211, 17713, 66272, 24067, 56637, 22630, 18634, 22084, 22627, 20813, 15526	411	133	13588	3.23151	0.670713	0.0261015	1.1533
3	GOTERM_BP_FAT	GO:0009057~macromolecule catabolic process	36	6.2069	0.0007257	22222, 22209, 11651, 224170, 67923, 26440, 59008, 20747, 21372, 50873, 22195, 26554, 67955, 67561, 217217, 26445, 17847, 19182, 56736, 19181, 192157, 75826, 56438, 78541, 22214, 23996, 68795, 68092, 70093, 22217, 19826, 215351, 26374, 54197, 19175, 19170	411	654	13588	1.81986	0.687905	0.0267168	1.20863
3	GOTERM_CC_FAT	GO:0005768~endosome	18	3.10345	0.00246784	68365, 27681, 19244, 218035, 68059, 18457, 19349, 17113, 30930, 230249, 268451, 56433, 20844, 67166, 66914, 28084, 66629, 16783	392	252	12504	2.27843	0.610885	0.0273794	3.36538
3	GOTERM_CC_FAT	GO:0031410~cytoplasmic vesicle	29	5	0.00262866	66884, 19349, 50797, 22348, 12330, 16443, 59021, 75622, 13002, 19027, 56418, 13855, 13830, 75826, 56334, 67878, 68365, 11749, 54401, 66290, 213827, 18477, 218811, 13382, 13030, 11765, 22627, 213948, 16783	392	508	12504	1.82095	0.634128	0.028319	3.581
3	GOTERM_CC_FAT	GO:0016023~cytoplasmic membrane-bounded vesicle	25	4.31034	0.00273385	66884, 19349, 50797, 12330, 59021, 16443, 75622, 13002, 19027, 13855, 13830, 75826, 67878, 56334, 68365, 11749, 54401, 66290, 18477, 218811, 13382, 13030, 11765, 22627, 16783	392	414	12504	1.92621	0.648576	0.0286311	3.7218
3	GOTERM_CC_FAT	GO:0005635~nuclear envelope	13	2.24138	0.00309492	110379, 77053, 14084, 103573, 16211, 219135, 68585, 21917, 18226, 67500, 23897, 75826, 18141	392	153	12504	2.71028	0.693976	0.0299051	4.20362
3	GOTERM_CC_FAT	GO:0044451~nucleoplasm part	29	5	0.00300048	27681, 74195, 15251, 21372, 54451, 30923, 51796, 22083, 15259, 20022, 26754, 212880, 20220, 193116, 12387, 103573, 18139, 13205, 19646, 19826, 24068, 14105, 24067, 26374, 18044, 19712, 18519, 230753, 67039	392	513	12504	1.8032	0.6827	0.0305482	4.07781
3	GOTERM_CC_FAT	GO:0008180~signalosome	4	0.689655	0.00309073	26754, 26893, 12848, 26891	392	10	12504	12.7592	0.693484	0.0306389	4.19804
3	GOTERM_CC_FAT	GO:0031988~membrane-bounded vesicle	25	4.31034	0.00330499	66884, 19349, 50797, 12330, 59021, 16443, 75622, 13002, 19027, 13855, 13830, 75826, 67878, 56334, 68365, 11749, 54401, 66290, 18477, 218811, 13382, 13030, 11765, 22627, 16783	392	420	12504	1.89869	0.717647	0.0311204	4.48292
3	GOTERM_BP_FAT	GO:0016071~mRNA metabolic process	21	3.62069	0.000868571	15387, 15568, 20817, 66899, 56403, 13207, 68092, 20383, 20901, 54451, 19826, 14105, 66354, 51796, 319322, 212880, 57905, 193116, 81898, 19134, 67039	411	302	13588	2.29893	0.751868	0.0311807	1.44495
3	GOTERM_CC_FAT	GO:0031982~vesicle	29	5	0.0035204	66884, 19349, 50797, 22348, 12330, 16443, 59021, 75622, 13002, 19027, 56418, 13855, 13830, 75826, 56334, 67878, 68365, 11749, 54401, 66290, 213827, 18477, 218811, 13382, 13030, 11765, 22627, 213948, 16783	392	519	12504	1.78235	0.740023	0.0323237	4.76852
3	GOTERM_CC_FAT	GO:0005764~lysosome	14	2.41379	0.00392872	81003, 68365, 66290, 19349, 16563, 17113, 13030, 67561, 67166, 75622, 19156, 56486, 56700, 16783	392	178	12504	2.50883	0.7777	0.0351697	5.30774
3	GOTERM_CC_FAT	GO:0000323~lytic vacuole	14	2.41379	0.00411994	81003, 68365, 66290, 19349, 16563, 17113, 13030, 67561, 67166, 75622, 19156, 56486, 56700, 16783	392	179	12504	2.49481	0.79342	0.0360116	5.55929
3	GOTERM_BP_FAT	GO:0009060~aerobic respiration	6	1.03448	0.00113823	17449, 56451, 12974, 67680, 66945, 20916	411	27	13588	7.34685	0.839067	0.0397819	1.88956
3	GOTERM_BP_FAT	GO:0051168~nuclear export	6	1.03448	0.00113823	56637, 97112, 103573, 68092, 14105, 15526	411	27	13588	7.34685	0.839067	0.0397819	1.88956
3	GOTERM_BP_FAT	GO:0008380~RNA splicing	16	2.75862	0.00116407	15387, 20817, 56403, 13207, 68092, 20383, 20901, 19826, 14105, 66354, 51796, 212880, 57905, 193116, 81898, 19134	411	201	13588	2.63171	0.845606	0.0398004	1.93205
3	GOTERM_MF_FAT	GO:0003743~translation initiation factor activity	8	1.37931	0.0017976	22384, 68135, 26905, 55944, 15467, 13681, 98221, 224045	378	62	13288	4.53593	0.582897	0.0449793	2.54759
3	GOTERM_BP_FAT	GO:0022904~respiratory electron transport chain	6	1.03448	0.00135178	66416, 67530, 13382, 66594, 66576, 68197	411	28	13588	7.08446	0.885791	0.045115	2.2403
4	GOTERM_CC_FAT	GO:0005694~chromosome	26	5.71429	2.07748e-07	72124, 226747, 13626, 54141, 21749, 269397, 21958, 381318, 72416, 20833, 218914, 64707, 16319, 74355, 20588, 20230, 52615, 70099, 20466, 59015, 18393, 21917, 21973, 19687, 94246, 19134	255	378	12504	3.3728	6.23225e-05	6.23225e-05	0.000277614
4	GOTERM_CC_FAT	GO:0005635~nuclear envelope	16	3.51648	4.99598e-07	226747, 72124, 22218, 269966, 380664, 12175, 16211, 16905, 59015, 72787, 72416, 110750, 21917, 320727, 70572, 71844	255	153	12504	5.12787	0.000149868	7.49369e-05	0.000667612
4	GOTERM_CC_FAT	GO:0005643~nuclear pore	10	2.1978	2.64699e-06	110750, 72124, 226747, 320727, 70572, 71844, 269966, 16211, 72787, 59015	255	59	12504	8.31107	0.000793782	0.000264664	0.00353711
4	GOTERM_CC_FAT	GO:0012505~endomembrane system	29	6.37363	4.21499e-06	66884, 72124, 226747, 12175, 269966, 319448, 16211, 16905, 109754, 72416, 110750, 66624, 18700, 70572, 71844, 56334, 14263, 68365, 70349, 22218, 12847, 380664, 67556, 53618, 72787, 59015, 21917, 320727, 27204	255	535	12504	2.65799	0.0012637	0.000316075	0.00563235
4	GOTERM_CC_FAT	GO:0044427~chromosomal part	21	4.61538	7.573e-06	16319, 226747, 72124, 74355, 20588, 54141, 13626, 21749, 20230, 269397, 21958, 381318, 52615, 20466, 59015, 18393, 21917, 218914, 19687, 64707, 94246	255	318	12504	3.23818	0.00226933	0.000454279	0.0101193
4	GOTERM_CC_FAT	GO:0046930~pore complex	10	2.1978	1.59669e-05	110750, 72124, 226747, 320727, 70572, 71844, 269966, 16211, 72787, 59015	255	73	12504	6.71716	0.00477867	0.000798035	0.0213346
4	GOTERM_CC_FAT	GO:0000228~nuclear chromosome	12	2.63736	3.48311e-05	72416, 18393, 16319, 74355, 13626, 20588, 21749, 20230, 269397, 218914, 52615, 64707	255	121	12504	4.863	0.0103951	0.00149167	0.0465348
4	GOTERM_CC_FAT	GO:0044454~nuclear chromosome part	11	2.41758	4.50606e-05	18393, 16319, 74355, 13626, 20588, 21749, 20230, 269397, 218914, 52615, 64707	255	103	12504	5.23678	0.0134275	0.00168839	0.0601979
4	GOTERM_CC_FAT	GO:0000792~heterochromatin	8	1.75824	7.09353e-05	18393, 16319, 74355, 13626, 20588, 20230, 52615, 64707	255	51	12504	7.69181	0.0210565	0.0023618	0.0947494
4	GOTERM_CC_FAT	GO:0031975~envelope	26	5.71429	0.00011183	72124, 226747, 13358, 12175, 269966, 16211, 16905, 109754, 72416, 110750, 70572, 66629, 71844, 15360, 76614, 12122, 22218, 380664, 72787, 59015, 21917, 18082, 17235, 320727, 66116, 68197	255	542	12504	2.35225	0.0329944	0.00304544	0.149336
4	GOTERM_CC_FAT	GO:0031967~organelle envelope	26	5.71429	0.000104999	72124, 226747, 13358, 12175, 269966, 16211, 16905, 109754, 72416, 110750, 70572, 66629, 71844, 15360, 76614, 12122, 22218, 380664, 72787, 59015, 21917, 18082, 17235, 320727, 66116, 68197	255	540	12504	2.36096	0.0310104	0.00314518	0.140219
4	GOTERM_CC_FAT	GO:0043228~non-membrane-bounded organelle	62	13.6264	0.000173926	66884, 226747, 72124, 13669, 54141, 13626, 56095, 71819, 16905, 80886, 13043, 72416, 70292, 72515, 18571, 74355, 20588, 21429, 260305, 20230, 67832, 52615, 69481, 59015, 74222, 18393, 67270, 21917, 237730, 71974, 21973, 19687, 66583, 71062, 94246, 244329, 67134, 21749, 269397, 21958, 66713, 381318, 56327, 56226, 68979, 353242, 14457, 20833, 218914, 67681, 56417, 64707, 59069, 16319, 20873, 14083,…	255	1919	12504	1.58426	0.0508442	0.00433908	0.232168
4	GOTERM_CC_FAT	GO:0043232~intracellular non-membrane-bounded organelle	62	13.6264	0.000173926	66884, 226747, 72124, 13669, 54141, 13626, 56095, 71819, 16905, 80886, 13043, 72416, 70292, 72515, 18571, 74355, 20588, 21429, 260305, 20230, 67832, 52615, 69481, 59015, 74222, 18393, 67270, 21917, 237730, 71974, 21973, 19687, 66583, 71062, 94246, 244329, 67134, 21749, 269397, 21958, 66713, 381318, 56327, 56226, 68979, 353242, 14457, 20833, 218914, 67681, 56417, 64707, 59069, 16319, 20873, 14083,…	255	1919	12504	1.58426	0.0508442	0.00433908	0.232168
4	GOTERM_CC_FAT	GO:0009898~internal side of plasma membrane	17	3.73626	0.000257099	16370, 68365, 16653, 14083, 70349, 213827, 12847, 109754, 14706, 11765, 17235, 12540, 80708, 78287, 14269, 27204, 71844	255	287	12504	2.90453	0.0742395	0.00549483	0.343017
4	GOTERM_CC_FAT	GO:0000776~kinetochore	8	1.75824	0.000249257	18393, 16319, 72124, 226747, 54141, 381318, 20466, 59015	255	62	12504	6.32713	0.0720585	0.0057363	0.33257
4	GOTERM_BP_FAT	GO:0045184~establishment of protein localization	33	7.25275	8.84921e-06	66884, 72124, 226747, 55946, 22343, 14569, 16211, 268451, 110750, 65114, 22630, 21354, 78287, 70572, 71844, 18571, 56334, 70361, 50927, 68365, 347722, 11842, 12122, 70349, 213827, 57258, 12847, 72787, 59015, 24067, 11765, 19330, 320727	288	656	13588	2.37341	0.0119016	0.00596864	0.0145188
4	GOTERM_CC_FAT	GO:0000793~condensed chromosome	10	2.1978	0.000324013	72416, 18393, 16319, 72124, 226747, 54141, 269397, 21973, 218914, 381318	255	107	12504	4.58274	0.0926433	0.00646035	0.432113
4	GOTERM_CC_FAT	GO:0000775~chromosome, centromeric region	10	2.1978	0.00042567	18393, 16319, 72124, 226747, 54141, 269397, 381318, 20466, 64707, 59015	255	111	12504	4.41759	0.119907	0.00795123	0.567329
4	GOTERM_CC_FAT	GO:0031981~nuclear lumen	34	7.47253	0.000484116	67134, 226747, 56095, 140477, 13626, 224836, 15251, 68979, 16905, 80886, 51796, 72416, 72515, 56070, 56417, 21429, 20873, 20230, 56353, 67832, 19668, 52615, 22218, 67154, 19646, 20466, 24067, 72504, 237730, 327987, 21973, 66583, 230753, 56086	255	883	12504	1.88811	0.135211	0.00850889	0.644993
4	GOTERM_CC_FAT	GO:0000785~chromatin	12	2.63736	0.000548174	18393, 16319, 74355, 226747, 21917, 13626, 20588, 20230, 21958, 52615, 64707, 94246	255	165	12504	3.5662	0.15168	0.0090971	0.730049
4	GOTERM_BP_FAT	GO:0006479~protein amino acid methylation	8	1.75824	2.92746e-05	225363, 13626, 71974, 20230, 52615, 14852, 64707, 15469	288	43	13588	8.77778	0.038835	0.00985343	0.0480231
4	GOTERM_BP_FAT	GO:0008213~protein amino acid alkylation	8	1.75824	2.92746e-05	225363, 13626, 71974, 20230, 52615, 14852, 64707, 15469	288	43	13588	8.77778	0.038835	0.00985343	0.0480231
4	GOTERM_BP_FAT	GO:0015031~protein transport	33	7.25275	7.58088e-06	66884, 72124, 226747, 55946, 22343, 14569, 16211, 268451, 110750, 65114, 22630, 21354, 78287, 70572, 71844, 18571, 56334, 70361, 50927, 68365, 347722, 11842, 12122, 70349, 213827, 57258, 12847, 72787, 59015, 24067, 11765, 19330, 320727	288	651	13588	2.39164	0.0102045	0.0102045	0.012438
4	GOTERM_CC_FAT	GO:0005720~nuclear heterochromatin	6	1.31868	0.000655731	74355, 13626, 20588, 20230, 52615, 64707	255	35	12504	8.40605	0.178632	0.0103036	0.872711
4	GOTERM_BP_FAT	GO:0008104~protein localization	35	7.69231	2.32204e-05	66884, 72124, 226747, 55946, 22343, 14569, 16211, 268451, 110750, 65114, 22630, 12540, 21354, 78287, 70572, 71844, 18571, 56334, 70361, 50927, 68365, 347722, 11842, 12122, 70349, 213827, 57258, 12847, 20466, 72787, 59015, 24067, 11765, 19330, 320727	288	753	13588	2.19299	0.0309292	0.0104179	0.0380934
4	GOTERM_CC_FAT	GO:0000779~condensed chromosome, centromeric region	7	1.53846	0.00132429	18393, 16319, 72124, 226747, 54141, 269397, 381318	255	60	12504	5.72078	0.328035	0.0196812	1.75523
4	GOTERM_BP_FAT	GO:0043414~biopolymer methylation	9	1.97802	0.000120634	225363, 56095, 13626, 71974, 20230, 52615, 14852, 64707, 15469	288	71	13588	5.98063	0.150602	0.0321184	0.197753
6	KEGG_PATHWAY	mmu04012:ErbB signaling pathway	8	2.53968	1.83435e-05	216148, 12322, 14083, 11651, 12928, 26400, 11352, 26420	57	87	5738	9.2567	0.00183269	0.00183269	0.0203582
6	GOTERM_CC_FAT	GO:0042995~cell projection	18	5.71429	8.48653e-05	14218, 12661, 329165, 12387, 14083, 260305, 11727, 11651, 71132, 74711, 192212, 22350, 52335, 217124, 12879, 12286, 170835, 19876	130	575	12504	3.011	0.0178313	0.0178313	0.107331
6	GOTERM_CC_FAT	GO:0044463~cell projection part	9	2.85714	0.00037389	22350, 217124, 12879, 260305, 12387, 71132, 170835, 74711, 19876	130	170	12504	5.09213	0.0762183	0.0388644	0.472072
7	GOTERM_CC_FAT	GO:0030529~ribonucleoprotein complex	47	8.93536	1.66221e-15	68836, 107686, 19935, 67840, 64659, 28000, 20624, 110809, 53607, 70769, 94065, 216767, 51796, 19656, 76936, 69878, 65019, 193116, 66373, 20222, 100336, 68988, 78523, 68981, 53817, 103573, 20088, 64660, 66480, 236511, 101943, 20901, 18114, 66921, 237730, 70767, 67308, 75062, 78651, 20823, 56463, 20055, 17975, 27397, 66585, 17149, 19942	322	462	12504	3.95047	5.4956e-13	5.4956e-13	2.25375e-12
7	KEGG_PATHWAY	mmu03040:Spliceosome	24	4.56274	4.85262e-14	68988, 107686, 68981, 53817, 28000, 20624, 110809, 20383, 101943, 53607, 56215, 66921, 319322, 70767, 76936, 212880, 69878, 75062, 78651, 66585, 17149, 193116, 20222, 66373	151	124	5738	7.35484	5.53091e-12	5.53091e-12	5.51781e-11
7	GOTERM_CC_FAT	GO:0005681~spliceosome	22	4.18251	5.62132e-12	100336, 68988, 107686, 68981, 53817, 28000, 20624, 110809, 101943, 53607, 20901, 19656, 51796, 66921, 70767, 76936, 75062, 69878, 66585, 17149, 193116, 20222	322	124	12504	6.8896	1.85502e-09	9.27511e-10	7.62083e-09
7	GOTERM_MF_FAT	GO:0003723~RNA binding	49	9.31559	2.17995e-11	110611, 19935, 56200, 15569, 13665, 110809, 224170, 20383, 19656, 212880, 69878, 66373, 78697, 16201, 66870, 22384, 66118, 237730, 276770, 20823, 78651, 236732, 27041, 53356, 212528, 81702, 233908, 53607, 14007, 51796, 76936, 66660, 15547, 13681, 193116, 23874, 105559, 100336, 68988, 53817, 68981, 231413, 103573, 19089, 236511, 14030, 17975, 71990, 17149	328	672	13288	2.95401	1.03112e-08	1.03112e-08	3.11472e-08
7	GOTERM_BP_FAT	GO:0008380~RNA splicing	27	5.13308	8.10615e-12	107686, 28000, 20624, 110809, 20383, 53607, 14007, 19656, 51796, 76936, 212880, 69878, 193116, 20222, 66373, 100336, 68988, 53817, 68981, 101943, 20901, 66921, 70767, 75062, 78651, 66585, 17149	346	201	13588	5.2753	1.27753e-08	1.27753e-08	1.35492e-08
7	GOTERM_BP_FAT	GO:0016071~mRNA metabolic process	31	5.89354	1.64801e-10	107686, 28000, 20624, 110809, 20383, 53607, 14007, 19656, 51796, 319322, 76936, 212880, 69305, 69878, 193116, 20222, 66373, 100336, 11803, 68988, 68981, 53817, 236511, 101943, 20901, 66921, 70767, 75062, 78651, 66585, 17149	346	302	13588	4.0312	2.59726e-07	6.49316e-08	2.7546e-07
7	GOTERM_BP_FAT	GO:0006397~mRNA processing	29	5.51331	1.26235e-10	107686, 28000, 20624, 110809, 20383, 53607, 14007, 19656, 51796, 319322, 76936, 212880, 69878, 193116, 20222, 66373, 100336, 11803, 68988, 68981, 53817, 101943, 20901, 66921, 70767, 75062, 78651, 66585, 17149	346	262	13588	4.34686	1.98946e-07	6.63153e-08	2.10997e-07
7	GOTERM_BP_FAT	GO:0006396~RNA processing	38	7.22433	1.18146e-10	107686, 212528, 28000, 20624, 110809, 20383, 53607, 14007, 51796, 19656, 319322, 76936, 212880, 224907, 69878, 15547, 193116, 20222, 66373, 100336, 11803, 68988, 68981, 53817, 67936, 101943, 20901, 74467, 18114, 66921, 237730, 70767, 75062, 78651, 20823, 66585, 71990, 17149	346	437	13588	3.41493	1.86199e-07	9.30993e-08	1.97478e-07
7	GOTERM_BP_FAT	GO:0006412~translation	30	5.70342	2.68353e-09	68836, 13669, 19935, 56347, 67840, 53356, 64659, 15115, 68184, 13665, 55944, 216767, 94065, 217057, 70120, 233870, 65019, 23874, 13681, 78523, 64660, 20088, 66480, 16418, 22384, 276770, 20055, 27397, 224045, 19942	346	319	13588	3.69326	4.22923e-06	8.45847e-07	4.48543e-06
7	GOTERM_MF_FAT	GO:0008135~translation factor activity, nucleic acid binding	15	2.85171	1.14471e-07	13669, 56347, 53356, 68184, 13665, 20624, 55944, 236511, 16418, 15467, 22384, 233870, 276770, 13681, 224045	328	98	13288	6.20085	5.41431e-05	2.70719e-05	0.000163555
7	GOTERM_MF_FAT	GO:0003743~translation initiation factor activity	12	2.28137	2.80944e-07	22384, 13669, 53356, 56347, 68184, 13665, 55944, 236511, 15467, 16418, 13681, 224045	328	62	13288	7.84107	0.000132878	3.3221e-05	0.000401411
7	GOTERM_MF_FAT	GO:0000166~nucleotide binding	91	17.3004	2.12675e-07	50995, 72162, 93762, 19935, 15115, 56200, 15569, 13494, 110809, 20383, 15467, 80837, 27405, 19656, 17217, 233870, 26425, 20187, 19654, 12995, 212880, 75607, 58864, 12567, 224742, 14924, 14923, 11821, 53323, 14724, 26396, 22384, 18213, 78891, 20823, 19687, 21974, 69241, 230753, 236732, 13649, 21915, 27041, 53356, 20624, 11853, 11651, 81702, 233908, 56327, 53607, 14007, 69237, 233571, 70120, 76936,…	328	2183	13288	1.68878	0.00010059	3.35312e-05	0.000303869
7	GOTERM_CC_FAT	GO:0031981~nuclear lumen	46	8.74525	7.10112e-06	67134, 67683, 56200, 28000, 97112, 74195, 110809, 21372, 70769, 69237, 68979, 51796, 74035, 217218, 212880, 12567, 65019, 27049, 193116, 22110, 18432, 100336, 68988, 16201, 18511, 12387, 11689, 20230, 19668, 67936, 103573, 66420, 16418, 56215, 13018, 18114, 69920, 237730, 70767, 17975, 21974, 71990, 17149, 69241, 230753, 56086	322	883	12504	2.02297	0.00234063	0.000390487	0.00962663
7	GOTERM_CC_FAT	GO:0031974~membrane-enclosed lumen	57	10.8365	3.59712e-06	19935, 56200, 74195, 110809, 21372, 94065, 70769, 217218, 212880, 12567, 65019, 22110, 16201, 12387, 20230, 67936, 13018, 18114, 69920, 237730, 231997, 21974, 69241, 230753, 67134, 14356, 68836, 67840, 64659, 67683, 28000, 97112, 69237, 68979, 51796, 74035, 70120, 30055, 27049, 193116, 100336, 18432, 18511, 68988, 11689, 103573, 19668, 64660, 66420, 16418, 56215, 70767, 17975, 27397, 71990, 17149…	322	1174	12504	1.88538	0.00118635	0.000395605	0.00487654
7	GOTERM_CC_FAT	GO:0043233~organelle lumen	55	10.4563	6.1206e-06	19935, 56200, 74195, 110809, 21372, 94065, 70769, 217218, 212880, 12567, 65019, 22110, 16201, 12387, 20230, 67936, 13018, 69920, 18114, 237730, 231997, 21974, 69241, 230753, 67134, 68836, 67840, 64659, 67683, 28000, 97112, 69237, 68979, 51796, 74035, 70120, 27049, 193116, 100336, 18432, 18511, 68988, 11689, 103573, 19668, 64660, 66420, 16418, 56215, 70767, 17975, 27397, 71990, 17149, 56086	322	1136	12504	1.88008	0.00201777	0.000403879	0.00829745
7	GOTERM_CC_FAT	GO:0070013~intracellular organelle lumen	55	10.4563	5.65141e-06	19935, 56200, 74195, 110809, 21372, 94065, 70769, 217218, 212880, 12567, 65019, 22110, 16201, 12387, 20230, 67936, 13018, 69920, 18114, 237730, 231997, 21974, 69241, 230753, 67134, 68836, 67840, 64659, 67683, 28000, 97112, 69237, 68979, 51796, 74035, 70120, 27049, 193116, 100336, 18432, 18511, 68988, 11689, 103573, 19668, 64660, 66420, 16418, 56215, 70767, 17975, 27397, 71990, 17149, 56086	322	1133	12504	1.88506	0.00186323	0.000466134	0.0076614
7	GOTERM_CC_FAT	GO:0043228~non-membrane-bounded organelle	75	14.2586	0.00015135	13669, 19935, 56200, 19387, 18643, 268996, 23859, 70769, 94065, 76652, 77531, 65019, 22110, 70799, 16201, 78523, 12387, 20230, 67936, 66480, 22388, 12345, 14724, 18114, 101314, 67308, 237730, 19357, 78891, 19687, 21974, 12385, 98932, 67134, 68836, 58804, 67840, 20410, 64659, 67683, 97112, 11651, 56327, 216767, 69237, 68979, 74035, 53598, 20833, 12879, 218914, 14211, 59069, 106952, 22589, 71765, 1…	322	1919	12504	1.51768	0.0487222	0.0071102	0.204991
7	GOTERM_CC_FAT	GO:0043232~intracellular non-membrane-bounded organelle	75	14.2586	0.00015135	13669, 19935, 56200, 19387, 18643, 268996, 23859, 70769, 94065, 76652, 77531, 65019, 22110, 70799, 16201, 78523, 12387, 20230, 67936, 66480, 22388, 12345, 14724, 18114, 101314, 67308, 237730, 19357, 78891, 19687, 21974, 12385, 98932, 67134, 68836, 58804, 67840, 20410, 64659, 67683, 97112, 11651, 56327, 216767, 69237, 68979, 74035, 53598, 20833, 12879, 218914, 14211, 59069, 106952, 22589, 71765, 1…	322	1919	12504	1.51768	0.0487222	0.0071102	0.204991
7	GOTERM_MF_FAT	GO:0003735~structural constituent of ribosome	14	2.6616	9.07998e-05	68836, 78523, 67840, 19935, 64659, 64660, 20088, 66480, 216767, 94065, 20055, 65019, 27397, 19942	328	151	13288	3.7561	0.0420409	0.00855326	0.129656
7	GOTERM_CC_FAT	GO:0033279~ribosomal subunit	9	1.71103	0.00027183	68836, 19935, 64659, 20055, 20088, 64660, 27397, 216767, 94065	322	66	12504	5.29531	0.0858093	0.0111519	0.367895
7	GOTERM_CC_FAT	GO:0031975~envelope	29	5.51331	0.000345207	14356, 66043, 14232, 53333, 227731, 12175, 16211, 17827, 110750, 233870, 12034, 30055, 66046, 70572, 66594, 76614, 11689, 103573, 16418, 52637, 223696, 18391, 66119, 12028, 276770, 27397, 12861, 18436, 68198	322	542	12504	2.07774	0.107687	0.01258	0.466987
7	GOTERM_CC_FAT	GO:0005840~ribosome	15	2.85171	0.000435738	68836, 78523, 67840, 19935, 64659, 64660, 20088, 66480, 216767, 94065, 67308, 20055, 65019, 27397, 19942	322	192	12504	3.03377	0.133961	0.0129899	0.589121
7	GOTERM_CC_FAT	GO:0005730~nucleolus	20	3.80228	0.00041524	18432, 67134, 16201, 56200, 67683, 97112, 103573, 67936, 70769, 69237, 68979, 56215, 18114, 74035, 237730, 17975, 21974, 65019, 71990, 22110	322	310	12504	2.50531	0.12808	0.0136123	0.56148
7	GOTERM_CC_FAT	GO:0005761~mitochondrial ribosome	7	1.3308	0.00057556	68836, 19935, 67840, 64659, 64660, 27397, 94065	322	41	12504	6.6299	0.173032	0.0157078	0.777479
7	GOTERM_CC_FAT	GO:0000313~organellar ribosome	7	1.3308	0.00057556	68836, 19935, 67840, 64659, 64660, 27397, 94065	322	41	12504	6.6299	0.173032	0.0157078	0.777479
7	GOTERM_CC_FAT	GO:0031967~organelle envelope	28	5.32319	0.000722654	14356, 66043, 14232, 53333, 227731, 12175, 16211, 17827, 110750, 233870, 12034, 30055, 66046, 70572, 66594, 76614, 11689, 103573, 16418, 52637, 223696, 18391, 66119, 12028, 276770, 27397, 12861, 68198	322	540	12504	2.01353	0.21224	0.0181836	0.975277
7	GOTERM_BP_FAT	GO:0022613~ribonucleoprotein complex biogenesis	13	2.47148	0.000191754	67134, 68988, 13669, 97112, 67936, 55944, 16418, 14007, 69237, 18114, 237730, 78651, 193116	346	137	13588	3.72651	0.260834	0.0491246	0.320028
7	GOTERM_CC_FAT	GO:0044429~mitochondrial part	26	4.94297	0.00216542	14356, 68836, 67840, 19935, 64659, 66043, 14232, 53333, 227731, 94065, 17827, 70120, 233870, 12034, 30055, 66046, 66594, 76614, 64660, 52637, 223696, 66119, 12028, 27397, 12861, 68198	322	524	12504	1.92679	0.510985	0.0498138	2.8961
8	KEGG_PATHWAY	mmu04720:Long-term potentiation	8	1.89573	0.000193004	17931, 56398, 12322, 11514, 14814, 19056, 109880, 18795	101	70	5738	6.49279	0.0204416	0.0204416	0.216734
9	GOTERM_CC_FAT	GO:0005730~nucleolus	29	6.85579	5.41556e-13	67134, 27993, 67683, 56200, 97112, 108911, 276919, 66164, 243897, 17192, 74111, 74035, 107071, 27998, 28126, 100608, 18432, 98956, 22059, 67154, 24128, 27966, 53414, 208366, 237730, 227715, 55989, 21973, 50912	216	310	12504	5.41541	1.53805e-10	1.53805e-10	7.17648e-10
9	GOTERM_CC_FAT	GO:0031981~nuclear lumen	46	10.8747	2.66746e-11	67134, 109095, 27993, 56200, 21417, 67683, 97112, 108911, 244631, 71957, 276919, 66164, 243897, 17192, 74035, 74111, 26754, 18506, 107071, 27998, 53890, 28126, 56456, 100608, 18432, 98956, 23808, 20230, 22059, 14106, 67154, 24128, 19826, 68275, 27966, 208366, 53414, 237730, 227715, 55989, 21973, 18538, 50912, 98758, 227644, 56086	216	883	12504	3.01573	7.5756e-09	3.7878e-09	3.53474e-08
9	GOTERM_CC_FAT	GO:0043233~organelle lumen	50	11.8203	1.0177e-09	27993, 56200, 71957, 66164, 243897, 74111, 26754, 18506, 107071, 27998, 53890, 28126, 100608, 23808, 20230, 14106, 19826, 208366, 237730, 227715, 55989, 21973, 18538, 72831, 67134, 109095, 67683, 21417, 97112, 108911, 244631, 276919, 17192, 74035, 12974, 71941, 56456, 18432, 98956, 56280, 22059, 67154, 24128, 68275, 27966, 53414, 98758, 50912, 227644, 56086	216	1136	12504	2.54793	2.89026e-07	7.22564e-08	1.34858e-06
9	GOTERM_CC_FAT	GO:0070013~intracellular organelle lumen	50	11.8203	9.3042e-10	27993, 56200, 71957, 66164, 243897, 74111, 26754, 18506, 107071, 27998, 53890, 28126, 100608, 23808, 20230, 14106, 19826, 208366, 237730, 227715, 55989, 21973, 18538, 72831, 67134, 109095, 67683, 21417, 97112, 108911, 244631, 276919, 17192, 74035, 12974, 71941, 56456, 18432, 98956, 56280, 22059, 67154, 24128, 68275, 27966, 53414, 98758, 50912, 227644, 56086	216	1133	12504	2.55467	2.64239e-07	8.80798e-08	1.23293e-06
9	GOTERM_CC_FAT	GO:0031974~membrane-enclosed lumen	50	11.8203	3.07159e-09	27993, 56200, 71957, 66164, 243897, 74111, 26754, 18506, 107071, 27998, 53890, 28126, 100608, 23808, 20230, 14106, 19826, 208366, 237730, 227715, 55989, 21973, 18538, 72831, 67134, 109095, 67683, 21417, 97112, 108911, 244631, 276919, 17192, 74035, 12974, 71941, 56456, 18432, 98956, 56280, 22059, 67154, 24128, 68275, 27966, 53414, 98758, 50912, 227644, 56086	216	1174	12504	2.46546	8.72332e-07	1.74466e-07	4.07026e-06
9	GOTERM_CC_FAT	GO:0043228~non-membrane-bounded organelle	60	14.1844	3.28337e-06	20742, 27993, 56200, 20743, 66163, 66164, 243897, 18221, 74111, 76652, 18226, 107071, 27998, 69736, 28126, 100608, 20587, 20230, 75796, 71435, 22350, 208366, 237730, 227715, 56742, 55989, 21976, 67036, 21973, 18538, 72831, 67134, 67683, 16664, 97112, 269397, 11651, 108911, 244631, 276919, 17192, 74035, 20129, 18432, 445007, 98956, 56280, 15078, 22059, 23825, 67154, 24128, 68275, 16694, 69654, 279…	216	1919	12504	1.80997	0.000932043	0.000155401	0.0043508
9	GOTERM_CC_FAT	GO:0043232~intracellular non-membrane-bounded organelle	60	14.1844	3.28337e-06	20742, 27993, 56200, 20743, 66163, 66164, 243897, 18221, 74111, 76652, 18226, 107071, 27998, 69736, 28126, 100608, 20587, 20230, 75796, 71435, 22350, 208366, 237730, 227715, 56742, 55989, 21976, 67036, 21973, 18538, 72831, 67134, 67683, 16664, 97112, 269397, 11651, 108911, 244631, 276919, 17192, 74035, 20129, 18432, 445007, 98956, 56280, 15078, 22059, 23825, 67154, 24128, 68275, 16694, 69654, 279…	216	1919	12504	1.80997	0.000932043	0.000155401	0.0043508
9	GOTERM_CC_FAT	GO:0030529~ribonucleoprotein complex	23	5.43735	1.51672e-05	76626, 56280, 27993, 68981, 233833, 20624, 66163, 66354, 27966, 208366, 77721, 237730, 18226, 57905, 55989, 67036, 78651, 20638, 66585, 98758, 20646, 67439, 100608	216	462	12504	2.88191	0.00429826	0.000615171	0.0200966
9	GOTERM_BP_FAT	GO:0006396~RNA processing	25	5.91017	2.06549e-06	109095, 27993, 212528, 27374, 20624, 71957, 66354, 319322, 57905, 27998, 20638, 53890, 67439, 68981, 24128, 19826, 27966, 208366, 237730, 227715, 78651, 66585, 50912, 98758, 68510	253	437	13588	3.07251	0.002939	0.002939	0.00341054
9	GOTERM_MF_FAT	GO:0003723~RNA binding	31	7.32861	6.98833e-06	76626, 109095, 27993, 15569, 212528, 56200, 66164, 74111, 27998, 16589, 20638, 53890, 23874, 57837, 68981, 233833, 231413, 19089, 19826, 27966, 77721, 237730, 227715, 22099, 276770, 78651, 26987, 98758, 50912, 20646, 72831	247	672	13288	2.48173	0.00316769	0.00316769	0.0099264
9	GOTERM_BP_FAT	GO:0022613~ribonucleoprotein complex biogenesis	13	3.07329	9.11177e-06	67134, 27993, 27374, 97112, 66164, 27966, 53414, 237730, 227715, 55989, 78651, 27998, 50912	253	137	13588	5.09633	0.0129004	0.00431876	0.0150445
9	GOTERM_BP_FAT	GO:0042254~ribosome biogenesis	12	2.83688	7.22444e-06	67134, 27966, 53414, 237730, 27993, 227715, 55989, 97112, 78651, 27998, 50912, 66164	253	112	13588	5.75438	0.010242	0.0051342	0.0119285
9	GOTERM_BP_FAT	GO:0034660~ncRNA metabolic process	15	3.5461	2.44178e-05	27993, 212528, 71957, 27966, 208366, 20226, 237730, 227715, 85305, 78651, 27998, 71941, 50912, 23874, 68510	253	202	13588	3.98818	0.0341974	0.00866123	0.0403117
9	GOTERM_CC_FAT	GO:0046930~pore complex	8	1.89125	0.000250938	110750, 445007, 18226, 276770, 53333, 69736, 70572, 16211	216	73	12504	6.34399	0.0687946	0.00886985	0.332015
9	GOTERM_CC_FAT	GO:0005643~nuclear pore	7	1.65485	0.000508063	110750, 445007, 18226, 276770, 69736, 70572, 16211	216	59	12504	6.86817	0.134395	0.0159084	0.671158
9	GOTERM_CC_FAT	GO:0005635~nuclear envelope	10	2.36407	0.00130685	110750, 445007, 18226, 276770, 23897, 18538, 69736, 70572, 16211, 243897	216	153	12504	3.78359	0.310224	0.0364577	1.71795
10	GOTERM_MF_FAT	GO:0000166~nucleotide binding	61	14.186	5.2541e-06	56195, 15569, 110809, 211347, 53621, 432508, 27405, 100019, 12305, 20187, 66645, 224079, 381983, 56055, 18707, 17449, 227613, 53323, 22385, 268859, 26397, 80981, 19718, 74591, 14773, 21973, 14673, 67039, 66590, 109095, 68087, 20624, 11651, 81702, 232341, 14450, 20620, 244631, 22196, 71985, 26385, 56454, 237877, 110821, 74178, 14228, 21687, 237806, 12466, 12464, 231413, 230908, 22059, 16553, 21854…	210	2183	13288	1.76814	0.00203128	0.00203128	0.00729296
11	GOTERM_MF_FAT	GO:0000166~nucleotide binding	113	23.4927	9.82945e-16	72162, 67418, 26905, 71916, 18749, 20383, 14782, 228012, 17217, 17215, 13990, 15525, 13144, 15526, 14186, 14674, 74355, 50926, 20818, 68365, 15201, 71732, 117150, 69207, 17913, 18213, 20823, 19687, 93687, 13549, 230753, 67039, 21915, 72047, 109095, 11651, 69237, 19324, 17922, 24015, 215449, 24013, 14211, 74178, 22589, 12469, 67054, 12675, 338467, 11842, 233833, 22059, 56215, 17876, 68278, 19335, …	327	2183	13288	2.10347	4.42646e-13	4.42646e-13	1.40998e-12
11	GOTERM_CC_FAT	GO:0031981~nuclear lumen	63	13.0977	6.63284e-15	11911, 230233, 13626, 27993, 56095, 74197, 110809, 70769, 13211, 16905, 66164, 70930, 22278, 13006, 217558, 19653, 72515, 18506, 268903, 22110, 19184, 74427, 56399, 66409, 13207, 13205, 19646, 19826, 21423, 18949, 17913, 18114, 22289, 23885, 66637, 229504, 230753, 74322, 67039, 72047, 109095, 70998, 97112, 23989, 71702, 21849, 69237, 217109, 60321, 56070, 27049, 52705, 56456, 14265, 225160, 33846…	300	883	12504	2.97377	2.25819e-12	2.25819e-12	9.07052e-12
11	KEGG_PATHWAY	mmu03040:Spliceosome	22	4.5738	3.82552e-13	225160, 72047, 110809, 13207, 20383, 71702, 101943, 71713, 56215, 60321, 67958, 319322, 76936, 75062, 56070, 20638, 66585, 230596, 17149, 67465, 64340, 67039	134	124	5738	7.59726	4.32319e-11	4.32319e-11	4.34397e-10
11	GOTERM_BP_FAT	GO:0006396~RNA processing	43	8.93971	6.94512e-14	109095, 27993, 56095, 71916, 110809, 20383, 71702, 18789, 217109, 60321, 19656, 432508, 67958, 19653, 319322, 76936, 20638, 230596, 52705, 94223, 225160, 77065, 230908, 66409, 13207, 56403, 218543, 71713, 101943, 20901, 19826, 18949, 18114, 68278, 74044, 75062, 66926, 20823, 66585, 17149, 66637, 67465, 67039	344	437	13588	3.88673	1.02443e-10	1.02443e-10	1.1523e-10
11	GOTERM_BP_FAT	GO:0006397~mRNA processing	31	6.44491	3.95289e-12	109095, 110809, 20383, 71702, 18789, 60321, 432508, 19656, 319322, 19653, 76936, 20638, 230596, 225160, 230908, 13207, 56403, 218543, 101943, 71713, 20901, 19826, 18949, 68278, 74044, 75062, 66585, 17149, 66637, 67465, 67039	344	262	13588	4.67366	5.82648e-09	2.91324e-09	6.55389e-09
11	GOTERM_CC_FAT	GO:0043233~organelle lumen	65	13.5135	4.93312e-11	11911, 230233, 13626, 27993, 56095, 74197, 110809, 70769, 13211, 16905, 66164, 70930, 22278, 13006, 217558, 19653, 72515, 18506, 268903, 22110, 19184, 74427, 56399, 58911, 66409, 13207, 13205, 19646, 19826, 21423, 18949, 17913, 18114, 22289, 23885, 66637, 229504, 230753, 74322, 67039, 72047, 109095, 70998, 97112, 23989, 71702, 21849, 69237, 217109, 60321, 56070, 27049, 52705, 56456, 14265, 225160…	300	1136	12504	2.38486	1.67233e-08	4.18082e-09	6.71489e-08
11	GOTERM_CC_FAT	GO:0031974~membrane-enclosed lumen	67	13.9293	2.47731e-11	11911, 230233, 13626, 27993, 56095, 74197, 110809, 70769, 13211, 16905, 66164, 70930, 22278, 13006, 217558, 19653, 72515, 18506, 268903, 22110, 19184, 74427, 56399, 58911, 66409, 13207, 13205, 19646, 19826, 21423, 18949, 17913, 18114, 22289, 23885, 66637, 229504, 230753, 74322, 67039, 72047, 109095, 70998, 97112, 23989, 71702, 21849, 69237, 217109, 60321, 56070, 27049, 52705, 66629, 56456, 14265,…	300	1174	12504	2.37867	8.39807e-09	4.19904e-09	3.37207e-08
11	GOTERM_CC_FAT	GO:0070013~intracellular organelle lumen	65	13.5135	4.41603e-11	11911, 230233, 13626, 27993, 56095, 74197, 110809, 70769, 13211, 16905, 66164, 70930, 22278, 13006, 217558, 19653, 72515, 18506, 268903, 22110, 19184, 74427, 56399, 58911, 66409, 13207, 13205, 19646, 19826, 21423, 18949, 17913, 18114, 22289, 23885, 66637, 229504, 230753, 74322, 67039, 72047, 109095, 70998, 97112, 23989, 71702, 21849, 69237, 217109, 60321, 56070, 27049, 52705, 56456, 14265, 225160…	300	1133	12504	2.39117	1.49704e-08	4.99012e-09	6.01104e-08
11	GOTERM_BP_FAT	GO:0016071~mRNA metabolic process	32	6.65281	2.98689e-11	109095, 110809, 20383, 71702, 18789, 60321, 432508, 19656, 319322, 19653, 76936, 20638, 230596, 225160, 50926, 230908, 13207, 56403, 218543, 101943, 71713, 20901, 19826, 18949, 68278, 74044, 75062, 66585, 17149, 66637, 67465, 67039	344	302	13588	4.18543	4.40267e-08	1.46756e-08	4.95233e-08
11	GOTERM_MF_FAT	GO:0003723~RNA binding	48	9.97921	6.70614e-11	67418, 72047, 109095, 27993, 110809, 224170, 20383, 71702, 18789, 14911, 13211, 66164, 19656, 432508, 74213, 70930, 67958, 19653, 76936, 16589, 20638, 52705, 20658, 105559, 94223, 14265, 225160, 50926, 233833, 231413, 230908, 66409, 13207, 56403, 18139, 11640, 13205, 19826, 17876, 27050, 66942, 77721, 20823, 14030, 17149, 67120, 67465, 236732	327	672	13288	2.90258	2.97082e-08	1.48541e-08	9.49268e-08
11	GOTERM_BP_FAT	GO:0008380~RNA splicing	26	5.40541	4.34467e-11	109095, 110809, 71702, 20383, 60321, 19656, 19653, 76936, 20638, 230596, 225160, 230908, 56403, 13207, 218543, 101943, 71713, 20901, 19826, 18949, 68278, 74044, 75062, 66585, 17149, 67465	344	201	13588	5.10945	6.40404e-08	1.60101e-08	7.20356e-08
11	GOTERM_CC_FAT	GO:0005681~spliceosome	18	3.7422	5.97256e-09	56403, 110809, 13207, 71702, 218543, 101943, 71713, 20901, 18949, 19656, 76936, 74044, 75062, 20638, 66585, 230596, 17149, 67465	300	124	12504	6.05032	2.0247e-06	3.3745e-07	8.12976e-06
11	GOTERM_CC_FAT	GO:0030529~ribonucleoprotein complex	35	7.27651	5.08543e-09	27993, 110809, 71702, 13211, 70769, 66163, 432508, 19656, 76936, 20638, 230596, 52705, 78523, 20818, 118451, 233833, 66409, 13207, 56403, 218543, 101943, 71713, 20901, 66973, 27050, 18949, 18114, 77721, 74326, 74044, 75062, 20823, 66585, 17149, 67465	300	462	12504	3.15758	1.72396e-06	3.44792e-07	6.92221e-06
11	GOTERM_MF_FAT	GO:0017076~purine nucleotide binding	86	17.8794	5.52019e-09	72162, 93762, 26905, 71916, 18749, 13494, 75141, 14782, 18789, 13211, 231279, 228012, 17217, 233870, 17215, 13006, 58864, 13990, 16589, 15525, 105148, 19184, 224742, 13144, 15526, 18706, 14186, 74355, 14674, 68365, 20818, 15201, 73710, 13207, 13205, 20480, 117150, 17913, 66942, 67241, 18213, 26416, 20133, 19687, 93687, 66948, 13549, 235574, 230753, 21915, 72047, 229363, 11651, 14450, 69237, 21846…	327	1871	13288	1.86783	2.44544e-06	8.15147e-07	7.81393e-06
11	GOTERM_CC_FAT	GO:0005730~nucleolus	27	5.61331	2.68429e-08	56095, 27993, 70998, 97112, 21849, 13211, 69237, 217109, 70769, 60321, 66164, 70930, 217558, 19653, 72515, 52705, 22110, 14265, 77053, 66409, 13207, 22059, 56215, 18114, 17913, 66637, 229504	300	310	12504	3.63019	9.09971e-06	1.29996e-06	3.65382e-05
11	GOTERM_MF_FAT	GO:0032553~ribonucleotide binding	82	17.0478	2.01356e-08	72162, 93762, 26905, 18749, 13494, 75141, 18789, 13211, 231279, 228012, 17217, 233870, 17215, 13006, 58864, 13990, 16589, 105148, 19184, 224742, 13144, 15525, 15526, 18706, 14186, 74355, 14674, 68365, 20818, 15201, 73710, 13207, 13205, 20480, 117150, 17913, 66942, 67241, 18213, 26416, 20133, 19687, 93687, 13549, 235574, 230753, 21915, 72047, 229363, 11651, 14450, 69237, 21846, 19324, 17922, 22612…	327	1796	13288	1.85532	8.92002e-06	2.23001e-06	2.85023e-05
11	GOTERM_MF_FAT	GO:0032555~purine ribonucleotide binding	82	17.0478	2.01356e-08	72162, 93762, 26905, 18749, 13494, 75141, 18789, 13211, 231279, 228012, 17217, 233870, 17215, 13006, 58864, 13990, 16589, 105148, 19184, 224742, 13144, 15525, 15526, 18706, 14186, 74355, 14674, 68365, 20818, 15201, 73710, 13207, 13205, 20480, 117150, 17913, 66942, 67241, 18213, 26416, 20133, 19687, 93687, 13549, 235574, 230753, 21915, 72047, 229363, 11651, 14450, 69237, 21846, 19324, 17922, 22612…	327	1796	13288	1.85532	8.92002e-06	2.23001e-06	2.85023e-05
11	GOTERM_MF_FAT	GO:0030554~adenyl nucleotide binding	70	14.553	3.51354e-07	72162, 93762, 18749, 71916, 18789, 14782, 13211, 228012, 17217, 17215, 13006, 58864, 13990, 16589, 105148, 19184, 224742, 13144, 15525, 15526, 18706, 14186, 74355, 15201, 13207, 13205, 20480, 117150, 17913, 66942, 67241, 18213, 26416, 20133, 19687, 93687, 66948, 13549, 235574, 230753, 21915, 72047, 229363, 11651, 14450, 21846, 17922, 22612, 24015, 24013, 50772, 14211, 66105, 218629, 74178, 18555,…	327	1535	13288	1.85311	0.000155638	3.11295e-05	0.000497347
11	GOTERM_MF_FAT	GO:0001883~purine nucleoside binding	70	14.553	4.81912e-07	72162, 93762, 18749, 71916, 18789, 14782, 13211, 228012, 17217, 17215, 13006, 58864, 13990, 16589, 105148, 19184, 224742, 13144, 15525, 15526, 18706, 14186, 74355, 15201, 13207, 13205, 20480, 117150, 17913, 66942, 67241, 18213, 26416, 20133, 19687, 93687, 66948, 13549, 235574, 230753, 21915, 72047, 229363, 11651, 14450, 21846, 17922, 22612, 24015, 24013, 50772, 14211, 66105, 218629, 74178, 18555,…	327	1548	13288	1.83755	0.000213464	3.55805e-05	0.000682153
11	GOTERM_MF_FAT	GO:0001882~nucleoside binding	70	14.553	6.12259e-07	72162, 93762, 18749, 71916, 18789, 14782, 13211, 228012, 17217, 17215, 13006, 58864, 13990, 16589, 105148, 19184, 224742, 13144, 15525, 15526, 18706, 14186, 74355, 15201, 13207, 13205, 20480, 117150, 17913, 66942, 67241, 18213, 26416, 20133, 19687, 93687, 66948, 13549, 235574, 230753, 21915, 72047, 229363, 11651, 14450, 21846, 17922, 22612, 24015, 24013, 50772, 14211, 66105, 218629, 74178, 18555,…	327	1558	13288	1.82575	0.000271194	3.87465e-05	0.000866661
11	GOTERM_MF_FAT	GO:0005524~ATP binding	66	13.7214	7.80407e-07	72162, 93762, 18749, 18789, 13211, 228012, 17217, 17215, 13006, 58864, 13990, 16589, 105148, 19184, 224742, 13144, 15525, 15526, 18706, 14186, 74355, 15201, 13207, 13205, 20480, 117150, 17913, 66942, 67241, 18213, 26416, 20133, 19687, 93687, 13549, 235574, 230753, 21915, 72047, 229363, 11651, 14450, 21846, 17922, 22612, 24015, 24013, 50772, 14211, 66105, 218629, 74178, 18555, 56456, 22589, 12469,…	327	1443	13288	1.85862	0.000345661	4.32141e-05	0.00110468
11	GOTERM_CC_FAT	GO:0000228~nuclear chromosome	15	3.1185	1.12236e-06	19891, 74355, 235559, 56399, 13626, 101185, 21749, 269397, 21849, 21423, 18393, 13006, 19357, 218914, 22589	300	121	12504	5.16694	0.000380407	4.75587e-05	0.00152772
11	GOTERM_MF_FAT	GO:0032559~adenyl ribonucleotide binding	66	13.7214	1.17568e-06	72162, 93762, 18749, 18789, 13211, 228012, 17217, 17215, 13006, 58864, 13990, 16589, 105148, 19184, 224742, 13144, 15525, 15526, 18706, 14186, 74355, 15201, 13207, 13205, 20480, 117150, 17913, 66942, 67241, 18213, 26416, 20133, 19687, 93687, 13549, 235574, 230753, 21915, 72047, 229363, 11651, 14450, 21846, 17922, 22612, 24015, 24013, 50772, 14211, 66105, 218629, 74178, 18555, 56456, 22589, 12469,…	327	1460	13288	1.83697	0.000520689	5.78678e-05	0.00166418
11	GOTERM_CC_FAT	GO:0043228~non-membrane-bounded organelle	78	16.2162	1.70504e-06	235559, 13669, 13626, 27993, 56095, 73178, 268996, 70769, 13211, 18016, 66163, 16905, 66164, 70930, 19653, 13006, 217558, 72515, 77531, 16796, 22110, 19303, 18571, 70799, 74355, 78523, 56399, 15201, 118451, 71732, 73710, 66409, 13207, 234865, 22388, 12345, 21423, 66973, 17913, 18114, 18393, 67241, 19357, 26416, 19687, 66637, 229504, 21749, 70998, 97112, 76740, 269397, 11651, 381318, 21849, 50873,…	300	1919	12504	1.69413	0.000577841	6.42211e-05	0.00232085
11	GOTERM_CC_FAT	GO:0043232~intracellular non-membrane-bounded organelle	78	16.2162	1.70504e-06	235559, 13669, 13626, 27993, 56095, 73178, 268996, 70769, 13211, 18016, 66163, 16905, 66164, 70930, 19653, 13006, 217558, 72515, 77531, 16796, 22110, 19303, 18571, 70799, 74355, 78523, 56399, 15201, 118451, 71732, 73710, 66409, 13207, 234865, 22388, 12345, 21423, 66973, 17913, 18114, 18393, 67241, 19357, 26416, 19687, 66637, 229504, 21749, 70998, 97112, 76740, 269397, 11651, 381318, 21849, 50873,…	300	1919	12504	1.69413	0.000577841	6.42211e-05	0.00232085
11	GOTERM_CC_FAT	GO:0005654~nucleoplasm	35	7.27651	2.47629e-06	11911, 230233, 72047, 109095, 13626, 74197, 97112, 110809, 23989, 71702, 21849, 70769, 60321, 22278, 18506, 268903, 27049, 19184, 56456, 74427, 225160, 338467, 77065, 18139, 13205, 19646, 19826, 21423, 18949, 17913, 72993, 22289, 17149, 230753, 67039	300	599	12504	2.43539	0.000839111	8.39428e-05	0.00337063
11	GOTERM_MF_FAT	GO:0004386~helicase activity	15	3.1185	3.32375e-06	72162, 72047, 93762, 15201, 13207, 13205, 13211, 66942, 68278, 17217, 74044, 13990, 218629, 64340, 22589	327	129	13288	4.72513	0.00147134	0.000147232	0.00470473
11	GOTERM_CC_FAT	GO:0044451~nucleoplasm part	31	6.44491	5.56361e-06	11911, 230233, 72047, 13626, 74197, 110809, 23989, 71702, 70769, 60321, 22278, 18506, 268903, 27049, 19184, 56456, 74427, 225160, 338467, 77065, 18139, 13205, 19646, 19826, 21423, 18949, 72993, 22289, 17149, 230753, 67039	300	513	12504	2.51867	0.00188429	0.000171446	0.00757283
11	GOTERM_CC_FAT	GO:0016607~nuclear speck	12	2.4948	9.438e-06	74427, 225160, 72047, 110809, 18139, 71702, 13205, 17149, 19826, 67039, 60321, 18949	300	90	12504	5.55733	0.00319438	0.000266589	0.0128461
11	GOTERM_CC_FAT	GO:0016604~nuclear body	14	2.9106	3.54439e-05	74427, 225160, 72047, 338467, 18139, 110809, 71702, 13205, 70769, 19826, 18949, 60321, 17149, 67039	300	142	12504	4.1093	0.0119438	0.000857895	0.0482349
11	GOTERM_CC_FAT	GO:0005694~chromosome	24	4.9896	3.91851e-05	19891, 74355, 56399, 235559, 15201, 13626, 101185, 21749, 269397, 22059, 234865, 381318, 21849, 21423, 18393, 13006, 67241, 20833, 19357, 24061, 218914, 19687, 14211, 22589	300	378	12504	2.64635	0.0131962	0.000885209	0.053325
11	GOTERM_CC_FAT	GO:0044454~nuclear chromosome part	12	2.4948	3.43577e-05	18393, 19891, 74355, 13006, 56399, 13626, 101185, 21749, 269397, 218914, 21849, 21423	300	103	12504	4.85592	0.0115799	0.000895558	0.0467571
11	GOTERM_MF_FAT	GO:0008026~ATP-dependent helicase activity	11	2.2869	4.66979e-05	66942, 68278, 72162, 72047, 93762, 74044, 13207, 13205, 218629, 13211, 64340	327	86	13288	5.19764	0.0204751	0.00187893	0.0660815
11	GOTERM_MF_FAT	GO:0070035~purine NTP-dependent helicase activity	11	2.2869	4.66979e-05	66942, 68278, 72162, 72047, 93762, 74044, 13207, 13205, 218629, 13211, 64340	327	86	13288	5.19764	0.0204751	0.00187893	0.0660815
11	KEGG_PATHWAY	mmu04110:Cell cycle	12	2.4948	0.000165828	18393, 17217, 13006, 17215, 27401, 22630, 26965, 19357, 24061, 22059, 59008, 68999	134	128	5738	4.01446	0.0185656	0.00932627	0.188124
11	GOTERM_CC_FAT	GO:0016363~nuclear matrix	7	1.4553	0.000451745	225160, 13006, 56399, 56070, 23885, 74322, 16905	300	42	12504	6.94667	0.142021	0.00952782	0.613159
11	GOTERM_CC_FAT	GO:0044427~chromosomal part	19	3.9501	0.000637788	19891, 74355, 56399, 13626, 101185, 15201, 21749, 269397, 22059, 234865, 381318, 21849, 21423, 18393, 13006, 24061, 218914, 19687, 22589	300	318	12504	2.49031	0.19449	0.0126417	0.864665
11	GOTERM_CC_FAT	GO:0034399~nuclear periphery	7	1.4553	0.00104701	225160, 13006, 56399, 56070, 23885, 74322, 16905	300	49	12504	5.95429	0.298913	0.0195357	1.41581
11	GOTERM_MF_FAT	GO:0042623~ATPase activity, coupled	15	3.1185	0.00120842	72162, 72047, 93762, 13207, 13205, 19646, 13211, 66942, 68278, 74044, 207165, 19687, 218629, 235574, 64340	327	223	13288	2.73337	0.414713	0.0436562	1.69701
12	GOTERM_MF_FAT	GO:0000166~nucleotide binding	92	18.0039	2.23218e-07	18746, 50995, 72162, 93762, 18749, 13494, 56248, 20383, 14852, 18641, 26420, 70047, 71514, 19344, 19654, 12305, 104303, 212880, 56637, 56055, 17346, 75388, 18707, 15526, 14186, 20818, 17690, 97541, 68631, 16573, 22214, 22213, 12750, 68092, 224824, 13204, 117150, 13382, 19826, 244562, 26397, 27225, 11477, 20174, 74326, 69923, 21976, 20823, 21974, 93687, 17250, 216965, 13549, 14673, 13649, 229363, …	333	2183	13288	1.6817	0.000117182	0.000117182	0.000323647
12	GOTERM_MF_FAT	GO:0017076~purine nucleotide binding	77	15.0685	8.27978e-06	18746, 50995, 72162, 93762, 18749, 13494, 56248, 14852, 18641, 26420, 70047, 19344, 12305, 104303, 212880, 56637, 56055, 17346, 18707, 15526, 14186, 20818, 97541, 16573, 22214, 22213, 12750, 224824, 13204, 117150, 13382, 244562, 26397, 27225, 11477, 20174, 69923, 21976, 21974, 93687, 17250, 216965, 13549, 14673, 13649, 229363, 22192, 232944, 69237, 69719, 58800, 18595, 71985, 12322, 16569, 320632…	333	1871	13288	1.64222	0.00433747	0.000620794	0.0120043
12	GOTERM_MF_FAT	GO:0001882~nucleoside binding	67	13.1115	9.92779e-06	18746, 50995, 72162, 93762, 18749, 56248, 18641, 26420, 70047, 12305, 212880, 56637, 17346, 18707, 15526, 14186, 97541, 16573, 22214, 22213, 12750, 224824, 13204, 117150, 13382, 244562, 26397, 27225, 20174, 11477, 69923, 21976, 21974, 93687, 17250, 216965, 13549, 13649, 229363, 22192, 232944, 69719, 58800, 18595, 71985, 12322, 16569, 320632, 214897, 218629, 22589, 12469, 12468, 12465, 104458, 239…	333	1558	13288	1.71602	0.00519855	0.000651302	0.0143935
12	GOTERM_MF_FAT	GO:0001883~purine nucleoside binding	67	13.1115	8.10945e-06	18746, 50995, 72162, 93762, 18749, 56248, 18641, 26420, 70047, 12305, 212880, 56637, 17346, 18707, 15526, 14186, 97541, 16573, 22214, 22213, 12750, 224824, 13204, 117150, 13382, 244562, 26397, 27225, 20174, 11477, 69923, 21976, 21974, 93687, 17250, 216965, 13549, 13649, 229363, 22192, 232944, 69719, 58800, 18595, 71985, 12322, 16569, 320632, 214897, 218629, 22589, 12469, 12468, 12465, 104458, 239…	333	1548	13288	1.72711	0.00424843	0.000709328	0.0117574
12	GOTERM_MF_FAT	GO:0032555~purine ribonucleotide binding	75	14.6771	6.80224e-06	18746, 50995, 72162, 93762, 18749, 13494, 56248, 14852, 18641, 26420, 70047, 19344, 12305, 104303, 212880, 56637, 56055, 17346, 18707, 15526, 14186, 20818, 97541, 16573, 22214, 22213, 12750, 224824, 13204, 117150, 244562, 26397, 27225, 11477, 20174, 69923, 21976, 21974, 93687, 17250, 216965, 13549, 14673, 13649, 229363, 22192, 232944, 69237, 69719, 58800, 18595, 12322, 16569, 320632, 214897, 2186…	333	1796	13288	1.66637	0.00356482	0.000713982	0.00986223
12	GOTERM_MF_FAT	GO:0032553~ribonucleotide binding	75	14.6771	6.80224e-06	18746, 50995, 72162, 93762, 18749, 13494, 56248, 14852, 18641, 26420, 70047, 19344, 12305, 104303, 212880, 56637, 56055, 17346, 18707, 15526, 14186, 20818, 97541, 16573, 22214, 22213, 12750, 224824, 13204, 117150, 244562, 26397, 27225, 11477, 20174, 69923, 21976, 21974, 93687, 17250, 216965, 13549, 14673, 13649, 229363, 22192, 232944, 69237, 69719, 58800, 18595, 12322, 16569, 320632, 214897, 2186…	333	1796	13288	1.66637	0.00356482	0.000713982	0.00986223
12	GOTERM_MF_FAT	GO:0005524~ATP binding	64	12.5245	6.3853e-06	18746, 50995, 72162, 93762, 18749, 56248, 18641, 70047, 26420, 12305, 212880, 56637, 17346, 18707, 15526, 14186, 97541, 16573, 22214, 22213, 12750, 224824, 13204, 117150, 244562, 26397, 27225, 20174, 11477, 69923, 21976, 21974, 93687, 216965, 17250, 13549, 13649, 229363, 22192, 232944, 69719, 58800, 18595, 12322, 16569, 320632, 214897, 218629, 22589, 12469, 12468, 12465, 104458, 23996, 12464, 220…	333	1443	13288	1.76982	0.00334668	0.000837722	0.00925776
12	GOTERM_MF_FAT	GO:0030554~adenyl nucleotide binding	67	13.1115	6.04204e-06	18746, 50995, 72162, 93762, 18749, 56248, 18641, 26420, 70047, 12305, 212880, 56637, 17346, 18707, 15526, 14186, 97541, 16573, 22214, 22213, 12750, 224824, 13204, 117150, 13382, 244562, 26397, 27225, 20174, 11477, 69923, 21976, 21974, 93687, 17250, 216965, 13549, 13649, 229363, 22192, 232944, 69719, 58800, 18595, 71985, 12322, 16569, 320632, 214897, 218629, 22589, 12469, 12468, 12465, 104458, 239…	333	1535	13288	1.74173	0.00316706	0.0010568	0.00876011
12	GOTERM_MF_FAT	GO:0032559~adenyl ribonucleotide binding	65	12.7202	4.63999e-06	18746, 50995, 72162, 93762, 18749, 56248, 18641, 70047, 26420, 12305, 212880, 56637, 17346, 18707, 15526, 14186, 97541, 16573, 22214, 22213, 12750, 224824, 13204, 117150, 244562, 26397, 27225, 20174, 11477, 69923, 21976, 21974, 93687, 216965, 17250, 13549, 13649, 229363, 22192, 232944, 69719, 58800, 18595, 12322, 16569, 320632, 214897, 218629, 22589, 12469, 12468, 12465, 104458, 23996, 19087, 124…	333	1460	13288	1.77654	0.00243303	0.00121726	0.00672739
12	KEGG_PATHWAY	mmu04510:Focal adhesion	18	3.5225	3.96093e-05	12843, 13649, 12832, 12842, 12389, 12387, 12825, 16412, 13367, 12834, 26420, 18595, 330662, 56637, 19211, 18707, 19303, 98932	164	198	5738	3.18071	0.00533308	0.00178086	0.0464269
12	KEGG_PATHWAY	mmu04120:Ubiquitin mediated proteolysis	15	2.93542	2.67801e-05	22034, 50995, 50868, 52206, 17999, 63958, 229615, 22214, 22213, 12211, 22192, 103583, 22346, 66799, 56459	164	136	5738	3.85895	0.00360884	0.00180605	0.0313917
12	KEGG_PATHWAY	mmu04340:Hedgehog signaling pathway	10	1.95695	1.71484e-05	103236, 22416, 19207, 56637, 18749, 214897, 93687, 103583, 22421, 104318	164	54	5738	6.47922	0.00231238	0.00231238	0.0201024
12	GOTERM_BP_FAT	GO:0006396~RNA processing	29	5.67515	4.36275e-06	72656, 56194, 70312, 27374, 20383, 14007, 70047, 71514, 319322, 14000, 212880, 109077, 192159, 231769, 14791, 68092, 69639, 13204, 20901, 19826, 68278, 18114, 237730, 75062, 20823, 66585, 57750, 50912, 98758	338	437	13588	2.66781	0.00751483	0.0037645	0.00737314
12	GOTERM_CC_FAT	GO:0005829~cytosol	32	6.26223	1.2581e-05	229363, 18749, 26440, 101489, 26441, 18641, 78885, 69719, 26420, 20324, 56637, 12371, 53872, 18707, 22034, 12468, 17999, 12389, 12465, 68631, 23996, 22213, 12464, 14084, 22059, 13806, 72621, 14609, 56421, 74006, 433182, 12028, 22166	307	549	12504	2.37404	0.0041682	0.0041682	0.0170703
12	GOTERM_CC_FAT	GO:0031974~membrane-enclosed lumen	51	9.98043	7.01305e-05	72656, 56194, 14230, 15182, 56248, 12915, 223691, 70769, 22083, 71514, 22278, 56637, 212880, 109077, 14719, 192159, 18451, 16201, 56407, 12387, 229615, 68092, 69639, 14106, 22218, 13382, 19646, 19826, 18114, 18988, 20174, 237730, 21974, 23885, 12261, 74322, 225131, 69237, 74035, 12974, 66629, 18432, 14265, 14791, 22059, 66420, 17975, 57750, 98758, 50912, 11975	307	1174	12504	1.76935	0.0230151	0.004646	0.0951209
12	GOTERM_CC_FAT	GO:0043233~organelle lumen	50	9.78474	6.09551e-05	72656, 56194, 14230, 15182, 56248, 12915, 223691, 70769, 22083, 71514, 22278, 56637, 212880, 109077, 14719, 192159, 18451, 16201, 56407, 12387, 229615, 68092, 69639, 14106, 22218, 13382, 19646, 19826, 18114, 18988, 20174, 237730, 21974, 23885, 12261, 74322, 225131, 69237, 74035, 12974, 18432, 14265, 14791, 22059, 66420, 57750, 17975, 98758, 50912, 11975	307	1136	12504	1.79268	0.0200343	0.00504665	0.0826807
12	GOTERM_BP_FAT	GO:0001701~in utero embryonic development	22	4.30528	3.17639e-06	13649, 13132, 50868, 50927, 23996, 22059, 101489, 13806, 12211, 16412, 22682, 20732, 56305, 18595, 14609, 11477, 16878, 22416, 30957, 433182, 22003, 14673, 11975	338	267	13588	3.31246	0.00547693	0.00547693	0.00536822
12	GOTERM_MF_FAT	GO:0019904~protein domain specific binding	16	3.13112	9.6549e-05	14084, 228359, 53618, 19261, 22083, 330662, 66118, 22630, 18226, 12028, 20658, 22628, 13822, 19211, 19303, 16826	333	192	13288	3.32533	0.0494273	0.00561647	0.139897
12	GOTERM_CC_FAT	GO:0070013~intracellular organelle lumen	50	9.78474	5.68653e-05	72656, 56194, 14230, 15182, 56248, 12915, 223691, 70769, 22083, 71514, 22278, 56637, 212880, 109077, 14719, 192159, 18451, 16201, 56407, 12387, 229615, 68092, 69639, 14106, 22218, 13382, 19646, 19826, 18114, 18988, 20174, 237730, 21974, 23885, 12261, 74322, 225131, 69237, 74035, 12974, 18432, 14265, 14791, 22059, 66420, 57750, 17975, 98758, 50912, 11975	307	1133	12504	1.79742	0.0187027	0.00627351	0.0771352
12	GOTERM_CC_FAT	GO:0044445~cytosolic part	9	1.76125	0.000141119	12468, 56421, 12465, 12028, 433182, 12464, 13806, 18641, 18707, 26420	307	63	12504	5.81852	0.045774	0.0077787	0.19132
12	GOTERM_CC_FAT	GO:0031981~nuclear lumen	42	8.21918	5.20373e-05	72656, 56194, 225131, 15182, 223691, 12915, 70769, 69237, 22083, 71514, 74035, 22278, 212880, 56637, 109077, 192159, 18432, 14265, 16201, 12387, 229615, 14791, 68092, 22059, 69639, 14106, 22218, 66420, 19646, 19826, 18114, 18988, 20174, 237730, 17975, 57750, 21974, 23885, 98758, 50912, 11975, 74322	307	883	12504	1.93731	0.0171284	0.00860121	0.0705884
12	GOTERM_CC_FAT	GO:0031252~cell leading edge	11	2.15264	0.000415508	13043, 16443, 30957, 12387, 228359, 13367, 12345, 18472, 19303, 58800, 22352	307	112	12504	4.00023	0.128881	0.019518	0.562349
12	GOTERM_BP_FAT	GO:0030198~extracellular matrix organization	12	2.34834	4.02544e-05	94214, 18595, 18451, 12832, 18073, 11804, 56348, 12825, 216725, 22346, 100952, 20732	338	101	13588	4.77638	0.0672343	0.0229334	0.0680114
12	KEGG_PATHWAY	mmu04310:Wnt signaling pathway	13	2.54403	0.00100381	26932, 12387, 26931, 18749, 22059, 103583, 26420, 12322, 22416, 56637, 93687, 22421, 19056	164	149	5738	3.05263	0.126793	0.0333275	1.17052
12	GOTERM_BP_FAT	GO:0043062~extracellular structure organization	14	2.73973	8.59309e-05	94214, 18451, 12832, 11804, 12387, 56348, 12825, 216725, 22346, 100952, 20732, 18595, 18073, 22421	338	149	13588	3.77729	0.13807	0.0364638	0.145131
12	GOTERM_BP_FAT	GO:0009792~embryonic development ending in birth or egg hatching	25	4.89237	0.000155981	13649, 12211, 101489, 228361, 56305, 18595, 18092, 16878, 22034, 50927, 50868, 13132, 23996, 22059, 13806, 16412, 22682, 20732, 11477, 14609, 22416, 30957, 433182, 22003, 14673, 11975	338	425	13588	2.36478	0.236401	0.0377975	0.263294
12	KEGG_PATHWAY	mmu03018:RNA degradation	8	1.56556	0.00142798	433182, 72068, 78893, 69639, 13806, 50912, 69125, 66317, 15526	164	60	5738	4.66504	0.175449	0.0378483	1.66137
12	GOTERM_BP_FAT	GO:0009057~macromolecule catabolic process	33	6.45793	0.000191109	50995, 18744, 18542, 224170, 26440, 26441, 22192, 210766, 22346, 83962, 14000, 12491, 59025, 233038, 56736, 320713, 56459, 22034, 52206, 63958, 74996, 17999, 22214, 229615, 23996, 22213, 26931, 68092, 22218, 19826, 66799, 117589, 50912	338	654	13588	2.0285	0.281406	0.0404658	0.322499
12	GOTERM_CC_FAT	GO:0030529~ribonucleoprotein complex	24	4.69667	0.00100182	20818, 17690, 70312, 118451, 225131, 66229, 13204, 20901, 70769, 18114, 67270, 20174, 74326, 83962, 237730, 18226, 320632, 75062, 20823, 17975, 57750, 192159, 66585, 98758	307	462	12504	2.11583	0.283066	0.0407432	1.35089
12	GOTERM_MF_FAT	GO:0005201~extracellular matrix structural constituent	6	1.17417	0.000805141	12843, 12832, 12842, 50530, 12825, 100952	333	30	13288	7.98078	0.344836	0.0414053	1.16107
12	GOTERM_BP_FAT	GO:0008380~RNA splicing	16	3.13112	0.00014705	56194, 70312, 27374, 68092, 20383, 13204, 20901, 14007, 19826, 68278, 71514, 212880, 75062, 192159, 66585, 98758	338	201	13588	3.20009	0.224516	0.0414927	0.248237
12	GOTERM_BP_FAT	GO:0044265~cellular macromolecule catabolic process	31	6.06654	0.000272915	50995, 18744, 18542, 224170, 26440, 26441, 22192, 210766, 22346, 83962, 14000, 12491, 59025, 56736, 320713, 56459, 22034, 52206, 74996, 17999, 63958, 22214, 229615, 22213, 26931, 68092, 22218, 19826, 66799, 117589, 50912	338	609	13588	2.04637	0.376206	0.0419958	0.46025
12	GOTERM_BP_FAT	GO:0043009~chordate embryonic development	25	4.89237	0.000134577	13649, 12211, 101489, 228361, 56305, 18595, 18092, 16878, 22034, 50927, 50868, 13132, 23996, 22059, 13806, 16412, 22682, 20732, 11477, 14609, 22416, 30957, 433182, 22003, 14673, 11975	338	421	13588	2.38724	0.207608	0.0454735	0.227203
12	GOTERM_BP_FAT	GO:0030900~forebrain development	14	2.73973	0.000269584	65960, 13649, 12387, 15182, 11804, 18472, 18092, 83993, 22416, 30957, 12028, 21974, 11819, 22589	338	167	13588	3.37016	0.372602	0.0455474	0.454644
12	GOTERM_BP_FAT	GO:0070647~protein modification by small protein conjugation or removal	11	2.15264	0.000255011	17999, 63958, 22214, 229615, 12211, 14852, 22192, 320713, 22218, 210766, 22346	338	104	13588	4.25205	0.356589	0.0478158	0.430118
12	GOTERM_MF_FAT	GO:0048407~platelet-derived growth factor binding	4	0.782779	0.00116084	12843, 18595, 12842, 12825	333	9	13288	17.7351	0.456539	0.0495469	1.67001
13	GOTERM_BP_FAT	GO:0006259~DNA metabolic process	33	6.84647	1.81604e-09	235559, 15270, 63830, 21761, 21958, 18972, 13870, 19691, 17688, 13872, 17215, 110033, 11792, 13433, 67439, 19891, 110749, 72151, 53610, 66131, 56505, 23825, 24127, 27223, 106344, 20174, 19358, 67177, 24061, 67967, 20133, 69263, 22594	308	421	13588	3.45809	2.91655e-06	2.91655e-06	3.04233e-06
13	GOTERM_CC_FAT	GO:0005694~chromosome	26	5.39419	2.17235e-06	235559, 15270, 21761, 269397, 21958, 381318, 108911, 17688, 110033, 20937, 13433, 71765, 19891, 445007, 12615, 72151, 20230, 66131, 68298, 23825, 106344, 27223, 320394, 51788, 24061, 19118	289	378	12504	2.976	0.000651492	0.000651492	0.00290287
13	GOTERM_CC_FAT	GO:0044427~chromosomal part	23	4.77178	4.36169e-06	71765, 19891, 445007, 15270, 12615, 72151, 20230, 21761, 269397, 21958, 381318, 66131, 108911, 27223, 106344, 320394, 17688, 51788, 110033, 24061, 20937, 19118, 13433	289	318	12504	3.12933	0.00130766	0.000654041	0.00582838
13	KEGG_PATHWAY	mmu03430:Mismatch repair	7	1.45228	2.05242e-05	17688, 19891, 72151, 67967, 69263, 18972, 106344	159	22	5738	11.4826	0.00284882	0.00142543	0.0241833
13	GOTERM_CC_FAT	GO:0043232~intracellular non-membrane-bounded organelle	72	14.9378	2.13789e-05	67115, 235559, 23790, 21761, 17886, 20743, 56208, 11733, 243897, 17688, 13043, 73353, 18226, 16796, 64099, 19303, 16201, 72151, 12615, 20230, 69639, 69481, 68298, 27223, 320394, 217124, 69072, 19118, 71062, 22121, 72831, 15270, 227656, 22151, 73804, 269397, 72042, 21958, 381318, 67886, 108911, 68979, 60321, 97961, 11518, 68760, 26382, 110033, 20937, 232493, 22154, 13433, 18102, 19891, 71765, 2061…	289	1919	12504	1.62334	0.00639322	0.00213563	0.0285649
13	GOTERM_CC_FAT	GO:0043228~non-membrane-bounded organelle	72	14.9378	2.13789e-05	67115, 235559, 23790, 21761, 17886, 20743, 56208, 11733, 243897, 17688, 13043, 73353, 18226, 16796, 64099, 19303, 16201, 72151, 12615, 20230, 69639, 69481, 68298, 27223, 320394, 217124, 69072, 19118, 71062, 22121, 72831, 15270, 227656, 22151, 73804, 269397, 72042, 21958, 381318, 67886, 108911, 68979, 60321, 97961, 11518, 68760, 26382, 110033, 20937, 232493, 22154, 13433, 18102, 19891, 71765, 2061…	289	1919	12504	1.62334	0.00639322	0.00213563	0.0285649
13	KEGG_PATHWAY	mmu03420:Nucleotide excision repair	9	1.86722	1.7683e-05	13872, 19891, 72151, 19358, 67967, 69263, 18972, 106344, 13870	159	43	5738	7.55331	0.00245495	0.00245495	0.020836
13	GOTERM_BP_FAT	GO:0006396~RNA processing	27	5.60166	6.82378e-06	83701, 68219, 110809, 60321, 66354, 432508, 94230, 20227, 224907, 69878, 20638, 15547, 67439, 68981, 53610, 14791, 69639, 24127, 18813, 52530, 74044, 67242, 69072, 75062, 50783, 72544, 81898	308	437	13588	2.72576	0.0108992	0.00546453	0.011431
13	GOTERM_CC_FAT	GO:0005681~spliceosome	12	2.48963	0.000134672	20227, 67242, 68981, 74044, 75062, 69878, 110809, 20638, 50783, 67439, 81898, 66354	289	124	12504	4.18707	0.0395988	0.0100502	0.179812
13	GOTERM_CC_FAT	GO:0005657~replication fork	6	1.24481	0.000185721	19891, 72151, 15270, 13433, 106344, 27223	289	24	12504	10.8166	0.0541976	0.0110824	0.247895
13	KEGG_PATHWAY	mmu03030:DNA replication	7	1.45228	0.000331927	19891, 72151, 17215, 67967, 69263, 18972, 106344	159	35	5738	7.21761	0.0450971	0.0152642	0.39045
13	GOTERM_CC_FAT	GO:0000785~chromatin	13	2.6971	0.000435841	71765, 15270, 12615, 20230, 21761, 21958, 66131, 17688, 51788, 110033, 20937, 19118, 13433	289	165	12504	3.40887	0.12259	0.0162147	0.580849
13	GOTERM_MF_FAT	GO:0003684~damaged DNA binding	7	1.45228	3.5141e-05	17688, 20174, 15270, 19358, 27223, 13870, 22594	296	29	13288	10.836	0.017072	0.017072	0.0504489
13	GOTERM_CC_FAT	GO:0043233~organelle lumen	45	9.3361	0.00041152	83701, 11911, 11737, 227656, 68219, 21761, 110809, 108911, 68979, 30923, 243897, 60321, 13872, 13897, 97961, 94230, 272382, 56637, 11611, 15378, 16201, 98956, 14534, 53610, 20230, 14791, 272428, 69639, 66420, 56505, 67154, 58523, 52530, 18813, 17184, 20174, 104158, 67242, 13884, 69072, 100198, 50783, 19683, 72544, 72831	289	1136	12504	1.7139	0.116162	0.0174855	0.548518
13	GOTERM_CC_FAT	GO:0031981~nuclear lumen	37	7.67635	0.000567984	83701, 11911, 11737, 227656, 68219, 21761, 110809, 108911, 68979, 30923, 243897, 60321, 13872, 97961, 94230, 272382, 56637, 15378, 16201, 98956, 14534, 20230, 53610, 14791, 69639, 66420, 56505, 67154, 58523, 18813, 52530, 17184, 20174, 67242, 69072, 50783, 72544	289	883	12504	1.81298	0.156709	0.01876	0.75634
13	GOTERM_CC_FAT	GO:0070013~intracellular organelle lumen	45	9.3361	0.000388867	83701, 11911, 11737, 227656, 68219, 21761, 110809, 108911, 68979, 30923, 243897, 60321, 13872, 13897, 97961, 94230, 272382, 56637, 11611, 15378, 16201, 98956, 14534, 53610, 20230, 14791, 272428, 69639, 66420, 56505, 67154, 58523, 52530, 18813, 17184, 20174, 104158, 67242, 13884, 69072, 100198, 50783, 19683, 72544, 72831	289	1133	12504	1.71844	0.110133	0.0192593	0.518397
13	GOTERM_BP_FAT	GO:0006281~DNA repair	17	3.52697	4.50798e-05	110749, 235559, 15270, 53610, 21761, 21958, 27223, 13870, 17688, 13872, 20174, 110033, 19358, 24061, 11792, 67439, 22594	308	222	13588	3.37832	0.0698411	0.0238444	0.0754935
13	GOTERM_CC_FAT	GO:0031974~membrane-enclosed lumen	45	9.3361	0.000820026	83701, 11911, 11737, 227656, 68219, 21761, 110809, 108911, 68979, 30923, 243897, 60321, 13872, 13897, 97961, 94230, 272382, 56637, 11611, 15378, 16201, 98956, 14534, 53610, 20230, 14791, 272428, 69639, 66420, 56505, 67154, 58523, 52530, 18813, 17184, 20174, 104158, 67242, 13884, 69072, 100198, 50783, 19683, 72544, 72831	289	1174	12504	1.65842	0.218163	0.0243105	1.09027
13	GOTERM_CC_FAT	GO:0000775~chromosome, centromeric region	10	2.07469	0.00104505	445007, 12615, 20937, 24061, 269397, 381318, 13433, 108911, 27223, 320394	289	111	12504	3.89788	0.269247	0.0258013	1.38752
13	GOTERM_CC_FAT	GO:0030529~ribonucleoprotein complex	23	4.77178	0.00104089	67115, 68981, 15384, 110809, 56505, 27050, 66354, 432508, 18813, 52530, 20174, 20227, 18226, 74044, 67242, 75062, 69878, 56463, 20638, 50783, 22121, 67439, 81898	289	462	12504	2.15396	0.268334	0.0280032	1.38203
13	GOTERM_CC_FAT	GO:0000790~nuclear chromatin	7	1.45228	0.00159282	71765, 17688, 15270, 20937, 21761, 20230, 66131	289	55	12504	5.50664	0.380118	0.0361182	2.10765
13	GOTERM_CC_FAT	GO:0000228~nuclear chromosome	10	2.07469	0.00191451	71765, 17688, 19891, 15270, 235559, 20937, 21761, 20230, 269397, 66131	289	121	12504	3.57574	0.437241	0.0402328	2.5283
14	GOTERM_CC_FAT	GO:0030529~ribonucleoprotein complex	27	6.5534	1.02471e-06	76626, 11834, 28000, 20624, 110809, 432508, 19656, 67959, 18148, 18226, 20382, 65019, 192170, 100336, 22668, 12181, 66229, 20901, 18813, 20174, 20116, 75062, 56463, 68537, 68611, 67465, 19942	243	462	12504	3.00722	0.000284829	0.000284829	0.0013534
14	GOTERM_CC_FAT	GO:0005681~spliceosome	12	2.91262	2.80691e-05	100336, 19656, 22668, 11834, 28000, 20382, 75062, 20624, 110809, 20901, 67465, 192170	243	124	12504	4.97969	0.00777296	0.00389406	0.0370666
14	GOTERM_MF_FAT	GO:0008135~translation factor activity, nucleic acid binding	11	2.6699	2.68241e-05	22384, 56422, 53356, 56347, 20624, 67204, 26987, 223691, 66656, 73830, 67160	268	98	13288	5.56534	0.013508	0.00677694	0.0386964
14	GOTERM_MF_FAT	GO:0003723~RNA binding	32	7.76699	1.34424e-05	76626, 15568, 53356, 11834, 110809, 12785, 13046, 432508, 19656, 67959, 18148, 20382, 20658, 105559, 192170, 100336, 22668, 11727, 66870, 231413, 11640, 54196, 226169, 73830, 22384, 18813, 22099, 26987, 71990, 51886, 67465, 72831	268	672	13288	2.36105	0.00679217	0.00679217	0.0193937
14	GOTERM_CC_FAT	GO:0005829~cytosol	25	6.06796	0.000164873	12684, 101489, 59029, 12785, 69719, 109754, 76650, 18148, 56455, 53872, 22034, 17449, 12465, 14962, 23996, 14083, 11840, 14084, 14555, 55938, 108686, 12462, 12461, 171281, 56086	243	549	12504	2.34321	0.0448037	0.00761062	0.21754
14	GOTERM_CC_FAT	GO:0043233~organelle lumen	41	9.95146	0.000141332	67134, 28000, 67920, 110809, 223691, 67860, 68979, 20022, 11409, 18148, 20382, 14719, 65019, 28126, 192170, 100336, 11545, 77053, 21406, 11727, 56353, 12181, 272428, 66420, 67154, 17913, 18813, 22289, 192289, 20174, 66136, 104158, 67619, 71990, 68537, 11975, 16658, 12261, 74322, 72831, 56086	243	1136	12504	1.85716	0.0385312	0.00782783	0.186507
14	GOTERM_MF_FAT	GO:0000166~nucleotide binding	70	16.9903	5.14304e-05	76626, 14917, 15568, 50850, 13494, 75141, 110809, 13046, 432508, 19656, 19654, 270166, 76650, 270163, 20382, 19181, 27364, 14186, 17449, 22210, 234734, 272428, 53323, 226169, 74254, 14724, 17913, 22384, 20174, 101613, 16001, 93687, 13549, 235574, 14673, 72831, 13649, 53356, 20624, 20887, 15929, 14450, 69719, 225913, 17220, 67996, 67959, 11409, 12780, 75011, 12978, 27219, 109151, 18102, 192170, 67…	268	2183	13288	1.5899	0.0257388	0.00865429	0.074181
14	GOTERM_CC_FAT	GO:0070013~intracellular organelle lumen	41	9.95146	0.000133578	67134, 28000, 67920, 110809, 223691, 67860, 68979, 20022, 11409, 18148, 20382, 14719, 65019, 28126, 192170, 100336, 11545, 77053, 21406, 11727, 56353, 12181, 272428, 66420, 67154, 17913, 18813, 22289, 192289, 20174, 66136, 104158, 67619, 71990, 68537, 11975, 16658, 12261, 74322, 72831, 56086	243	1133	12504	1.86207	0.036456	0.00924132	0.176282
14	GOTERM_CC_FAT	GO:0005730~nucleolus	18	4.36893	0.000112262	67134, 11545, 77053, 67920, 11727, 12181, 223691, 67860, 67154, 68979, 18813, 17913, 66136, 18148, 67619, 65019, 71990, 28126	243	310	12504	2.98781	0.0307285	0.0103496	0.148171
14	GOTERM_CC_FAT	GO:0031974~membrane-enclosed lumen	41	9.95146	0.000281673	67134, 28000, 67920, 110809, 223691, 67860, 68979, 20022, 11409, 18148, 20382, 14719, 65019, 28126, 192170, 100336, 11545, 77053, 21406, 11727, 56353, 12181, 272428, 66420, 67154, 17913, 18813, 22289, 192289, 20174, 66136, 104158, 67619, 71990, 68537, 11975, 16658, 12261, 74322, 72831, 56086	243	1174	12504	1.79704	0.0753278	0.0111257	0.371387
14	GOTERM_CC_FAT	GO:0031981~nuclear lumen	33	8.00971	0.000429181	67134, 28000, 67920, 110809, 223691, 67860, 68979, 20022, 18148, 20382, 65019, 28126, 192170, 100336, 11545, 77053, 11727, 21406, 56353, 12181, 66420, 67154, 18813, 17913, 22289, 20174, 66136, 67619, 71990, 11975, 16658, 56086, 74322	243	883	12504	1.92307	0.112492	0.0148065	0.565368
14	GOTERM_CC_FAT	GO:0005852~eukaryotic translation initiation factor 3 complex	4	0.970874	0.00138414	53356, 56347, 223691, 73830	243	12	12504	17.1523	0.319589	0.0418819	1.81277
15	GOTERM_BP_FAT	GO:0048609~reproductive process in a multicellular organism	12	5.52995	4.629e-05	26927, 21463, 16878, 74288, 66722, 19116, 71830, 11651, 21958, 54388, 13166, 271639	86	409	13588	4.6357	0.0384498	0.0384498	0.0715641
15	GOTERM_BP_FAT	GO:0032504~multicellular organism reproduction	12	5.52995	4.629e-05	26927, 21463, 16878, 74288, 66722, 19116, 71830, 11651, 21958, 54388, 13166, 271639	86	409	13588	4.6357	0.0384498	0.0384498	0.0715641
16	GOTERM_BP_FAT	GO:0008104~protein localization	34	8.67347	3.05985e-07	66212, 19384, 107975, 97112, 18643, 22343, 271457, 14569, 16211, 20341, 66169, 18148, 67819, 231470, 20973, 12540, 216440, 11843, 53421, 54401, 66525, 213827, 21856, 11643, 232910, 66119, 102339, 11765, 21803, 19330, 67300, 54135, 22628, 68051	227	753	13588	2.7028	0.000452755	0.000452755	0.000507578
16	GOTERM_BP_FAT	GO:0046907~intracellular transport	24	6.12245	8.46213e-07	18432, 53421, 19384, 54401, 107975, 213827, 97112, 22228, 66366, 21856, 18472, 16211, 232910, 67819, 66169, 18148, 67458, 11765, 21803, 20973, 12540, 67300, 22628, 68051	227	431	13588	3.33322	0.00125161	0.000626002	0.00140372
16	GOTERM_BP_FAT	GO:0045184~establishment of protein localization	29	7.39796	4.38817e-06	66212, 19384, 107975, 97112, 22343, 271457, 14569, 16211, 20341, 67819, 66169, 231470, 20973, 53421, 11843, 54401, 66525, 213827, 21856, 232910, 66119, 102339, 11765, 21803, 19330, 67300, 22628, 54135, 68051	227	656	13588	2.64621	0.00647346	0.00162231	0.00727902
16	GOTERM_BP_FAT	GO:0015031~protein transport	29	7.39796	3.79333e-06	66212, 19384, 107975, 97112, 22343, 271457, 14569, 16211, 20341, 67819, 66169, 231470, 20973, 53421, 11843, 54401, 66525, 213827, 21856, 232910, 66119, 102339, 11765, 21803, 19330, 67300, 22628, 54135, 68051	227	651	13588	2.66653	0.00559841	0.00186963	0.00629234
16	GOTERM_MF_FAT	GO:0043021~ribonucleoprotein binding	7	1.78571	2.04505e-05	66212, 53421, 56347, 18148, 97112, 12181, 19045	227	34	13288	12.0518	0.00822803	0.00822803	0.0285619
16	KEGG_PATHWAY	mmu03040:Spliceosome	11	2.80612	7.8595e-05	66921, 225027, 68011, 72654, 67959, 78651, 110809, 66585, 20638, 20462, 101943	106	124	5738	4.80204	0.00954314	0.00954314	0.0904543
16	GOTERM_BP_FAT	GO:0070727~cellular macromolecule localization	17	4.33673	4.42245e-05	53421, 19384, 54401, 107975, 213827, 21856, 16211, 232910, 67819, 66169, 11765, 20973, 21803, 12540, 67300, 22628, 68051	227	301	13588	3.38074	0.0633576	0.0108497	0.0733361
16	GOTERM_BP_FAT	GO:0034613~cellular protein localization	17	4.33673	4.0879e-05	53421, 19384, 54401, 107975, 213827, 21856, 16211, 232910, 67819, 66169, 11765, 20973, 21803, 12540, 67300, 22628, 68051	227	299	13588	3.40336	0.0587083	0.0120275	0.0677901
16	GOTERM_BP_FAT	GO:0006886~intracellular protein transport	16	4.08163	5.97002e-05	53421, 19384, 54401, 107975, 213827, 21856, 16211, 232910, 67819, 66169, 11765, 20973, 21803, 67300, 22628, 68051	227	276	13588	3.47009	0.0845678	0.0125434	0.098987
17	GOTERM_BP_FAT	GO:0048232~male gamete generation	19	5.57185	1.16212e-09	104601, 69281, 225865, 66722, 21958, 18011, 54388, 252868, 57256, 75469, 78784, 83984, 70840, 21463, 58864, 12427, 22115, 14625, 22691	161	255	13588	6.28844	1.2946e-06	1.2946e-06	1.86138e-06
17	GOTERM_BP_FAT	GO:0007283~spermatogenesis	19	5.57185	1.16212e-09	104601, 69281, 225865, 66722, 21958, 18011, 54388, 252868, 57256, 75469, 78784, 83984, 70840, 21463, 58864, 12427, 22115, 14625, 22691	161	255	13588	6.28844	1.2946e-06	1.2946e-06	1.86138e-06
17	GOTERM_BP_FAT	GO:0019953~sexual reproduction	22	6.45161	4.99806e-09	104601, 69281, 225865, 66722, 11651, 21958, 18011, 54388, 252868, 57256, 75469, 83984, 78784, 70840, 21463, 58864, 75622, 114875, 12427, 22115, 14625, 22691	161	386	13588	4.81022	5.56782e-06	2.78391e-06	8.00541e-06
17	GOTERM_BP_FAT	GO:0007276~gamete generation	20	5.8651	1.20339e-08	104601, 69281, 225865, 66722, 21958, 11651, 18011, 54388, 252868, 57256, 75469, 83984, 78784, 70840, 21463, 58864, 12427, 22115, 14625, 22691	161	331	13588	5.09955	1.34057e-05	4.46858e-06	1.92748e-05
17	GOTERM_BP_FAT	GO:0032504~multicellular organism reproduction	21	6.15836	7.04038e-08	104601, 69281, 225865, 66722, 11651, 21958, 18011, 54388, 252868, 57256, 75469, 83984, 78784, 70840, 21463, 58864, 12427, 22115, 14602, 14625, 22691	161	409	13588	4.33337	7.84267e-05	1.96073e-05	0.000112766
17	GOTERM_BP_FAT	GO:0048609~reproductive process in a multicellular organism	21	6.15836	7.04038e-08	104601, 69281, 225865, 66722, 11651, 21958, 18011, 54388, 252868, 57256, 75469, 83984, 78784, 70840, 21463, 58864, 12427, 22115, 14602, 14625, 22691	161	409	13588	4.33337	7.84267e-05	1.96073e-05	0.000112766
18	GOTERM_CC_FAT	GO:0042995~cell projection	29	6.4588	4.5575e-07	14218, 12661, 73178, 66713, 75785, 13043, 56637, 77531, 12540, 53872, 14886, 17969, 83434, 225865, 329165, 14086, 69287, 14633, 13383, 22283, 26913, 24069, 52335, 18391, 14447, 270058, 18040, 170835, 17295	213	575	12504	2.96073	0.000117121	0.000117121	0.000594633
18	GOTERM_BP_FAT	GO:0032504~multicellular organism reproduction	24	5.34521	1.61281e-06	21744, 27061, 225865, 22215, 69287, 20437, 13526, 54388, 70069, 21959, 12344, 20744, 19120, 17283, 76407, 58864, 71830, 19059, 22114, 11434, 19118, 21830, 17295, 75388	248	409	13588	3.21508	0.00241791	0.00120969	0.00267993
18	GOTERM_BP_FAT	GO:0048609~reproductive process in a multicellular organism	24	5.34521	1.61281e-06	21744, 27061, 225865, 22215, 69287, 20437, 13526, 54388, 70069, 21959, 12344, 20744, 19120, 17283, 76407, 58864, 71830, 19059, 22114, 11434, 19118, 21830, 17295, 75388	248	409	13588	3.21508	0.00241791	0.00120969	0.00267993
18	GOTERM_BP_FAT	GO:0048232~male gamete generation	19	4.23163	9.63935e-07	27061, 21744, 225865, 69287, 20437, 13526, 54388, 70069, 21959, 12344, 20744, 19120, 76407, 58864, 71830, 22114, 19118, 21830, 75388	248	255	13588	4.08242	0.00144582	0.00144582	0.00160173
18	GOTERM_BP_FAT	GO:0007283~spermatogenesis	19	4.23163	9.63935e-07	27061, 21744, 225865, 69287, 20437, 13526, 54388, 70069, 21959, 12344, 20744, 19120, 76407, 58864, 71830, 22114, 19118, 21830, 75388	248	255	13588	4.08242	0.00144582	0.00144582	0.00160173
18	GOTERM_BP_FAT	GO:0019953~sexual reproduction	22	4.89978	7.8074e-06	21744, 27061, 225865, 69287, 22215, 20437, 13526, 54388, 70069, 21959, 12344, 20744, 19120, 76407, 58864, 75622, 71830, 22114, 11434, 19118, 21830, 75388	248	386	13588	3.12276	0.0116506	0.0038987	0.0129725
18	GOTERM_BP_FAT	GO:0007276~gamete generation	19	4.23163	3.56989e-05	27061, 21744, 225865, 69287, 20437, 13526, 54388, 70069, 21959, 12344, 20744, 19120, 76407, 58864, 71830, 22114, 19118, 21830, 75388	248	331	13588	3.14506	0.0521747	0.0133069	0.0593033
18	KEGG_PATHWAY	mmu04062:Chemokine signaling pathway	11	2.44989	0.000509439	14706, 26413, 18036, 56637, 73178, 215449, 12929, 12540, 20416, 17969, 18795	91	182	5738	3.81101	0.0545105	0.0276372	0.574069
18	KEGG_PATHWAY	mmu04722:Neurotrophin signaling pathway	9	2.00445	0.000912446	26413, 18036, 56637, 26416, 215449, 12929, 12540, 20416, 73914	91	130	5738	4.36534	0.0955379	0.0329176	1.02607
19	GOTERM_BP_FAT	GO:0006338~chromatin remodeling	8	1.74292	4.72642e-06	50927, 68703, 93762, 20587, 12648, 21761, 68142, 22385	271	35	13588	11.4606	0.00642142	0.00642142	0.00776185
19	GOTERM_BP_FAT	GO:0008104~protein localization	32	6.97168	9.52052e-05	109815, 56389, 107975, 97112, 17886, 56697, 192236, 14569, 243897, 19324, 268451, 65114, 77573, 18148, 67819, 22630, 13858, 67952, 59042, 50927, 12842, 68365, 11843, 11842, 233833, 14084, 21947, 102339, 77505, 17938, 67300, 67489	271	753	13588	2.13079	0.121703	0.0628252	0.156239
21	GOTERM_MF_FAT	GO:0003723~RNA binding	49	9.29791	4.73353e-13	110611, 56200, 11834, 13665, 20383, 66164, 19656, 432508, 66645, 212880, 20638, 245474, 75388, 16201, 50926, 66870, 56403, 66409, 13205, 226169, 14105, 66118, 237730, 28114, 20823, 13684, 67842, 108062, 80861, 77591, 67958, 76936, 52874, 23874, 193116, 207214, 140486, 68981, 231413, 229279, 103573, 20462, 236511, 27050, 13722, 67949, 22099, 17975, 71990	296	672	13288	3.27337	2.24391e-10	2.24391e-10	6.76592e-10
21	GOTERM_CC_FAT	GO:0005730~nucleolus	28	5.31309	6.24746e-10	68083, 56200, 97112, 69237, 68479, 68979, 66164, 66645, 223499, 52874, 245474, 16201, 21429, 66409, 103573, 54364, 67154, 59014, 80981, 18968, 237730, 69072, 67949, 21973, 28114, 17975, 71990, 216987	270	310	12504	4.18294	1.79302e-07	1.79302e-07	8.29207e-07
21	GOTERM_BP_FAT	GO:0006396~RNA processing	35	6.64137	3.80636e-10	72656, 108062, 11834, 20624, 20383, 68479, 432508, 19656, 69499, 67958, 76936, 223499, 212880, 20638, 245474, 193116, 68981, 229279, 66409, 56403, 232314, 20462, 13204, 54364, 20901, 14105, 68278, 20641, 237730, 69072, 20823, 28114, 71990, 19134, 216987	311	437	13588	3.4993	5.36696e-07	5.36696e-07	6.27706e-07
21	GOTERM_CC_FAT	GO:0031981~nuclear lumen	48	9.10816	5.49589e-09	68083, 72656, 56200, 15182, 97112, 56036, 68479, 59004, 69237, 68979, 66164, 22083, 66645, 22278, 212880, 26754, 223499, 19650, 12567, 52874, 245474, 17984, 193116, 16201, 21429, 66409, 103573, 52615, 14106, 13205, 54364, 67154, 14105, 59014, 80981, 18771, 18968, 237730, 69072, 67949, 170787, 28114, 21973, 17975, 71990, 21665, 216987, 56086	270	883	12504	2.51748	1.57732e-06	7.8866e-07	7.29454e-06
21	GOTERM_CC_FAT	GO:0043232~intracellular non-membrane-bounded organelle	78	14.8008	1.54434e-08	66884, 72124, 16647, 13669, 23790, 56200, 15182, 94062, 66164, 17688, 66645, 223499, 11487, 77531, 17984, 245474, 16201, 21429, 66409, 232314, 52615, 13346, 54364, 17698, 22388, 22283, 59015, 19052, 59014, 80981, 237730, 71974, 69072, 28114, 21973, 22147, 13589, 68083, 227800, 21749, 97112, 76740, 13430, 381318, 14453, 67886, 56226, 69237, 68479, 545156, 68979, 50775, 20833, 20129, 14211, 52874, …	270	1919	12504	1.88237	4.43224e-06	1.47741e-06	2.04975e-05
21	GOTERM_CC_FAT	GO:0043228~non-membrane-bounded organelle	78	14.8008	1.54434e-08	66884, 72124, 16647, 13669, 23790, 56200, 15182, 94062, 66164, 17688, 66645, 223499, 11487, 77531, 17984, 245474, 16201, 21429, 66409, 232314, 52615, 13346, 54364, 17698, 22388, 22283, 59015, 19052, 59014, 80981, 237730, 71974, 69072, 28114, 21973, 22147, 13589, 68083, 227800, 21749, 97112, 76740, 13430, 381318, 14453, 67886, 56226, 69237, 68479, 545156, 68979, 50775, 20833, 20129, 14211, 52874, …	270	1919	12504	1.88237	4.43224e-06	1.47741e-06	2.04975e-05
21	KEGG_PATHWAY	mmu03040:Spliceosome	16	3.03605	6.78034e-08	11834, 68981, 20624, 229279, 20462, 20383, 13204, 51810, 68479, 14105, 20641, 67958, 76936, 212880, 20638, 193116	128	124	5738	5.78427	8.67879e-06	8.67879e-06	7.87423e-05
21	GOTERM_MF_FAT	GO:0000166~nucleotide binding	86	16.3188	5.16934e-08	50995, 107045, 93762, 26905, 56200, 22321, 20383, 17688, 432508, 19656, 20187, 66645, 17215, 212880, 17219, 12567, 22637, 75388, 15525, 105148, 18707, 74153, 15526, 17449, 50926, 56403, 13205, 13204, 226169, 14105, 11477, 80981, 74326, 12715, 26395, 20823, 232975, 20133, 21973, 22147, 13549, 14673, 67844, 108062, 20624, 13430, 56325, 328099, 80861, 14450, 20620, 15925, 69237, 545156, 77591, 12322…	296	2183	13288	1.76853	2.45024e-05	1.22513e-05	7.38816e-05
21	GOTERM_CC_FAT	GO:0031974~membrane-enclosed lumen	53	10.0569	3.3007e-07	72656, 56200, 15182, 94062, 59004, 66164, 22083, 22278, 66645, 223499, 26754, 212880, 19650, 12567, 14719, 17984, 245474, 16201, 21429, 66409, 52615, 14106, 13205, 54364, 14105, 59014, 80981, 18771, 237730, 69072, 28114, 21973, 21665, 68083, 97112, 56036, 68479, 69237, 68979, 52874, 110821, 193116, 66629, 103573, 67154, 76299, 18968, 67949, 170787, 17975, 71990, 216987, 56086	270	1174	12504	2.09071	9.47256e-05	1.35328e-05	0.000438092
21	GOTERM_CC_FAT	GO:0043233~organelle lumen	52	9.86717	2.90261e-07	72656, 56200, 15182, 94062, 59004, 66164, 22083, 22278, 66645, 223499, 26754, 212880, 19650, 12567, 14719, 17984, 245474, 16201, 21429, 66409, 52615, 14106, 13205, 54364, 14105, 59014, 80981, 18771, 237730, 69072, 28114, 21973, 21665, 68083, 97112, 56036, 68479, 69237, 68979, 52874, 110821, 193116, 103573, 67154, 76299, 18968, 67949, 170787, 17975, 71990, 216987, 56086	270	1136	12504	2.11987	8.33015e-05	1.38841e-05	0.000385255
21	GOTERM_CC_FAT	GO:0070013~intracellular organelle lumen	52	9.86717	2.67455e-07	72656, 56200, 15182, 94062, 59004, 66164, 22083, 22278, 66645, 223499, 26754, 212880, 19650, 12567, 14719, 17984, 245474, 16201, 21429, 66409, 52615, 14106, 13205, 54364, 14105, 59014, 80981, 18771, 237730, 69072, 28114, 21973, 21665, 68083, 97112, 56036, 68479, 69237, 68979, 52874, 110821, 193116, 103573, 67154, 76299, 18968, 67949, 170787, 17975, 71990, 216987, 56086	270	1133	12504	2.12549	7.67566e-05	1.53518e-05	0.000354985
21	GOTERM_CC_FAT	GO:0005643~nuclear pore	11	2.08729	4.45957e-07	72124, 16648, 16647, 103468, 19069, 103573, 75826, 70572, 69912, 72787, 59015	270	59	12504	8.63427	0.000127982	1.59986e-05	0.000591905
21	GOTERM_CC_FAT	GO:0030529~ribonucleoprotein complex	30	5.6926	2.25452e-07	16647, 11834, 20624, 94062, 51810, 68479, 432508, 19656, 76936, 223499, 20638, 245474, 193116, 68981, 229279, 66409, 103573, 56403, 236511, 13204, 20901, 27050, 20641, 74326, 237730, 71974, 20823, 56463, 17975, 19134	270	462	12504	3.00722	6.47025e-05	1.6176e-05	0.000299235
21	GOTERM_CC_FAT	GO:0005681~spliceosome	14	2.65655	2.5871e-06	68981, 11834, 20624, 229279, 56403, 13204, 20901, 68479, 19656, 20641, 76936, 20638, 193116, 19134	270	124	12504	5.22867	0.000742224	8.24965e-05	0.00343373
21	GOTERM_CC_FAT	GO:0046930~pore complex	11	2.08729	3.38403e-06	72124, 16648, 16647, 103468, 19069, 103573, 75826, 70572, 69912, 72787, 59015	270	73	12504	6.97839	0.000970746	9.71171e-05	0.00449143
21	GOTERM_BP_FAT	GO:0008380~RNA splicing	20	3.79507	1.7143e-07	11834, 68981, 229279, 20624, 56403, 232314, 20462, 20383, 13204, 20901, 68479, 14105, 19656, 68278, 20641, 76936, 212880, 20638, 193116, 19134	311	201	13588	4.34739	0.000241688	0.000120851	0.000282705
21	GOTERM_BP_FAT	GO:0016071~mRNA metabolic process	24	4.55408	4.46139e-07	50926, 108062, 11834, 68981, 229279, 20624, 56403, 232314, 20383, 20462, 236511, 13204, 20901, 68479, 14105, 432508, 19656, 68278, 20641, 76936, 212880, 20638, 193116, 19134	311	302	13588	3.47216	0.000628859	0.000209664	0.000735726
21	GOTERM_BP_FAT	GO:0006397~mRNA processing	22	4.17457	6.20888e-07	108062, 11834, 68981, 229279, 20624, 56403, 232314, 20383, 20462, 13204, 20901, 68479, 14105, 432508, 19656, 68278, 20641, 76936, 212880, 20638, 193116, 19134	311	262	13588	3.66874	0.00087507	0.000218839	0.0010239
21	GOTERM_CC_FAT	GO:0005635~nuclear envelope	14	2.65655	2.593e-05	72124, 16648, 103468, 16647, 14084, 103573, 59015, 72787, 66940, 18968, 19069, 75826, 69912, 70572	270	153	12504	4.23762	0.00741439	0.000676318	0.0344107
21	GOTERM_CC_FAT	GO:0012505~endomembrane system	27	5.12334	8.97888e-05	66884, 72124, 16648, 16647, 103963, 56325, 68581, 109754, 19069, 20977, 319817, 75826, 69912, 70572, 56334, 103468, 14263, 14084, 103573, 76299, 72787, 59015, 66940, 18968, 56447, 76687, 239827	270	535	12504	2.3372	0.0254413	0.00214524	0.119109
21	GOTERM_BP_FAT	GO:0022613~ribonucleoprotein complex biogenesis	14	2.65655	1.49452e-05	13669, 97112, 106298, 69237, 14105, 66164, 59014, 69499, 237730, 223499, 69072, 245474, 193116, 216987	311	137	13588	4.46481	0.0208524	0.00420572	0.0246433
21	GOTERM_BP_FAT	GO:0015031~protein transport	33	6.26186	3.58694e-05	67844, 66884, 72124, 16648, 16647, 97112, 56325, 192236, 22343, 68581, 65114, 22630, 19069, 21354, 75826, 70572, 69912, 217463, 15526, 56334, 50907, 103468, 11841, 103573, 72787, 59015, 56447, 76983, 19330, 11767, 67015, 22628, 98710	311	651	13588	2.21477	0.0493191	0.00839404	0.0591358
21	GOTERM_BP_FAT	GO:0045184~establishment of protein localization	33	6.26186	4.18512e-05	67844, 66884, 72124, 16648, 16647, 97112, 56325, 192236, 22343, 68581, 65114, 22630, 19069, 21354, 75826, 70572, 69912, 217463, 15526, 56334, 50907, 103468, 11841, 103573, 72787, 59015, 56447, 76983, 19330, 11767, 67015, 22628, 98710	311	656	13588	2.19789	0.057304	0.00839476	0.0689944
21	GOTERM_CC_FAT	GO:0005694~chromosome	20	3.79507	0.000537693	72124, 103468, 21749, 15182, 103573, 381318, 52615, 70099, 59015, 19052, 17688, 18968, 24061, 20833, 19075, 21973, 14211, 56452, 69912, 19134	270	378	12504	2.45032	0.143036	0.0109651	0.711315
21	GOTERM_CC_FAT	GO:0031080~Nup107-160 complex	4	0.759013	0.000508958	72124, 103468, 69912, 59015	270	8	12504	23.1556	0.135936	0.0111762	0.67342
21	GOTERM_BP_FAT	GO:0051028~mRNA transport	9	1.70778	7.76886e-05	72124, 103468, 19069, 103573, 75826, 69912, 14105, 72787, 59015	311	62	13588	6.34229	0.103758	0.0135998	0.128039
21	GOTERM_BP_FAT	GO:0050657~nucleic acid transport	9	1.70778	0.000121958	72124, 103468, 19069, 103573, 75826, 69912, 14105, 72787, 59015	311	66	13588	5.95791	0.157996	0.0170501	0.200931
21	GOTERM_BP_FAT	GO:0051236~establishment of RNA localization	9	1.70778	0.000121958	72124, 103468, 19069, 103573, 75826, 69912, 14105, 72787, 59015	311	66	13588	5.95791	0.157996	0.0170501	0.200931
21	GOTERM_BP_FAT	GO:0050658~RNA transport	9	1.70778	0.000121958	72124, 103468, 19069, 103573, 75826, 69912, 14105, 72787, 59015	311	66	13588	5.95791	0.157996	0.0170501	0.200931
21	GOTERM_BP_FAT	GO:0008104~protein localization	35	6.64137	0.000110644	67844, 66884, 72124, 16648, 16647, 97112, 56325, 192236, 22343, 68581, 65114, 22630, 19069, 21354, 75826, 70572, 69912, 217463, 15526, 56334, 50907, 103468, 11841, 14084, 103573, 11643, 72787, 59015, 56447, 76983, 19330, 11767, 67015, 22628, 98710	311	753	13588	2.0308	0.144455	0.0171858	0.182307
21	GOTERM_BP_FAT	GO:0006403~RNA localization	9	1.70778	0.000135791	72124, 103468, 19069, 103573, 75826, 69912, 14105, 72787, 59015	311	67	13588	5.86898	0.174262	0.0172564	0.223697
21	GOTERM_BP_FAT	GO:0042254~ribosome biogenesis	11	2.08729	0.00023955	59014, 69499, 237730, 223499, 69072, 97112, 245474, 106298, 69237, 216987, 66164	311	112	13588	4.29111	0.286666	0.0256503	0.394309
21	GOTERM_BP_FAT	GO:0034660~ncRNA metabolic process	15	2.8463	0.000227494	107045, 72656, 22321, 353172, 54364, 69499, 237730, 223499, 69072, 28114, 110960, 245474, 23874, 105148, 216987	311	202	13588	3.2444	0.274434	0.0263794	0.3745
21	GOTERM_BP_FAT	GO:0015931~nucleobase, nucleoside, nucleotide and nucleic acid transport	9	1.70778	0.000273365	72124, 103468, 19069, 103573, 75826, 69912, 14105, 72787, 59015	311	74	13588	5.31381	0.319887	0.0271598	0.449852
21	GOTERM_MF_FAT	GO:0003743~translation initiation factor activity	8	1.51803	0.00042809	13684, 13669, 68184, 26905, 13665, 13690, 236511, 226982	296	62	13288	5.7925	0.183688	0.0285777	0.6101
21	GOTERM_MF_FAT	GO:0017076~purine nucleotide binding	64	12.1442	0.000381831	50995, 107045, 93762, 26905, 56200, 22321, 17688, 20187, 17215, 212880, 17219, 12567, 22637, 18707, 105148, 74153, 15525, 15526, 13205, 13204, 80981, 11477, 12715, 26395, 232975, 20133, 21973, 22147, 13549, 14673, 67844, 13430, 20624, 56325, 328099, 80861, 14450, 20620, 15925, 69237, 545156, 77591, 12322, 11514, 26385, 235582, 14211, 21354, 110960, 110821, 23874, 12469, 14263, 11841, 353172, 7009…	296	1871	13288	1.53559	0.165583	0.0297198	0.54434
21	GOTERM_MF_FAT	GO:0001882~nucleoside binding	55	10.4364	0.000549859	50995, 107045, 93762, 56200, 22321, 17688, 20187, 17215, 212880, 17219, 12567, 22637, 18707, 105148, 15525, 74153, 15526, 13205, 13204, 11477, 26395, 12715, 20133, 232975, 21973, 13549, 56325, 14450, 328099, 80861, 20620, 15925, 545156, 77591, 12322, 11514, 26385, 235582, 14211, 21354, 110960, 110821, 23874, 12469, 14263, 70093, 353172, 70099, 68278, 18968, 24061, 19330, 12462, 71990, 19134	296	1558	13288	1.58476	0.229492	0.0320629	0.783008
21	GOTERM_MF_FAT	GO:0005524~ATP binding	53	10.0569	0.00028156	50995, 107045, 93762, 56200, 22321, 17688, 20187, 17215, 212880, 17219, 12567, 22637, 18707, 105148, 15525, 74153, 15526, 13205, 13204, 11477, 26395, 12715, 20133, 232975, 21973, 13549, 56325, 14450, 328099, 80861, 20620, 15925, 545156, 77591, 12322, 11514, 26385, 235582, 14211, 21354, 110960, 110821, 23874, 12469, 70093, 353172, 70099, 68278, 24061, 19330, 12462, 71990, 19134	296	1443	13288	1.64884	0.124954	0.032819	0.401661
21	GOTERM_MF_FAT	GO:0032553~ribonucleotide binding	63	11.9545	0.000218181	50995, 107045, 93762, 26905, 56200, 22321, 17688, 20187, 17215, 212880, 17219, 12567, 22637, 18707, 105148, 74153, 15525, 15526, 13205, 13204, 80981, 11477, 12715, 26395, 232975, 20133, 21973, 22147, 13549, 14673, 67844, 13430, 20624, 56325, 328099, 80861, 14450, 20620, 69237, 15925, 545156, 77591, 12322, 11514, 26385, 235582, 14211, 21354, 110960, 110821, 23874, 12469, 11841, 353172, 70093, 2269…	296	1796	13288	1.57472	0.0982599	0.0338888	0.311378
21	GOTERM_MF_FAT	GO:0032555~purine ribonucleotide binding	63	11.9545	0.000218181	50995, 107045, 93762, 26905, 56200, 22321, 17688, 20187, 17215, 212880, 17219, 12567, 22637, 18707, 105148, 74153, 15525, 15526, 13205, 13204, 80981, 11477, 12715, 26395, 232975, 20133, 21973, 22147, 13549, 14673, 67844, 13430, 20624, 56325, 328099, 80861, 14450, 20620, 69237, 15925, 545156, 77591, 12322, 11514, 26385, 235582, 14211, 21354, 110960, 110821, 23874, 12469, 11841, 353172, 70093, 2269…	296	1796	13288	1.57472	0.0982599	0.0338888	0.311378
21	GOTERM_MF_FAT	GO:0032559~adenyl ribonucleotide binding	53	10.0569	0.000373497	50995, 107045, 93762, 56200, 22321, 17688, 20187, 17215, 212880, 17219, 12567, 22637, 18707, 105148, 15525, 74153, 15526, 13205, 13204, 11477, 26395, 12715, 20133, 232975, 21973, 13549, 56325, 14450, 328099, 80861, 20620, 15925, 545156, 77591, 12322, 11514, 26385, 235582, 14211, 21354, 110960, 110821, 23874, 12469, 70093, 353172, 70099, 68278, 24061, 19330, 12462, 71990, 19134	296	1460	13288	1.62964	0.162279	0.0347944	0.532488
21	GOTERM_MF_FAT	GO:0030554~adenyl nucleotide binding	54	10.2467	0.000682735	50995, 107045, 93762, 56200, 22321, 17688, 20187, 17215, 212880, 17219, 12567, 22637, 18707, 105148, 15525, 74153, 15526, 13205, 13204, 11477, 26395, 12715, 20133, 232975, 21973, 13549, 56325, 14450, 328099, 80861, 20620, 15925, 545156, 77591, 12322, 11514, 26385, 235582, 14211, 21354, 110960, 110821, 23874, 12469, 14263, 70093, 353172, 70099, 68278, 24061, 19330, 12462, 71990, 19134	296	1535	13288	1.57926	0.276552	0.0353304	0.971367
21	GOTERM_MF_FAT	GO:0001883~purine nucleoside binding	54	10.2467	0.000830696	50995, 107045, 93762, 56200, 22321, 17688, 20187, 17215, 212880, 17219, 12567, 22637, 18707, 105148, 15525, 74153, 15526, 13205, 13204, 11477, 26395, 12715, 20133, 232975, 21973, 13549, 56325, 14450, 328099, 80861, 20620, 15925, 545156, 77591, 12322, 11514, 26385, 235582, 14211, 21354, 110960, 110821, 23874, 12469, 14263, 70093, 353172, 70099, 68278, 24061, 19330, 12462, 71990, 19134	296	1548	13288	1.566	0.325588	0.0386256	1.18072
21	GOTERM_CC_FAT	GO:0000776~kinetochore	7	1.32827	0.0021016	72124, 103468, 24061, 103573, 381318, 69912, 59015	270	62	12504	5.22867	0.453266	0.0394535	2.7537
21	GOTERM_CC_FAT	GO:0005654~nucleoplasm	25	4.74383	0.00251843	72656, 15182, 97112, 56036, 22083, 22278, 66645, 26754, 212880, 19650, 12567, 245474, 17984, 193116, 103573, 14106, 52615, 13205, 14105, 18771, 18968, 170787, 17975, 21665, 56086	270	599	12504	1.93285	0.515046	0.0442237	3.29147
21	GOTERM_BP_FAT	GO:0000278~mitotic cell cycle	16	3.03605	0.000494569	72124, 14793, 21749, 381318, 20620, 70099, 22284, 12322, 18968, 24061, 52563, 26395, 14211, 22791, 69912, 13589	311	244	13588	2.865	0.502179	0.0454364	0.812476
22	GOTERM_BP_FAT	GO:0022613~ribonucleoprotein complex biogenesis	31	5.92734	5.10333e-19	67134, 104662, 13669, 56195, 97112, 229937, 83486, 68147, 18148, 223499, 225348, 52705, 229317, 192170, 72462, 67205, 67832, 72662, 16418, 18114, 52530, 69902, 67242, 213773, 227715, 55989, 57750, 50911, 66583, 216987, 72544	376	137	13588	8.17728	8.65526e-16	8.65526e-16	8.6053e-16
22	GOTERM_BP_FAT	GO:0006396~RNA processing	50	9.56023	2.71074e-17	56194, 56195, 80744, 71957, 19656, 432508, 83486, 94230, 223499, 212880, 225348, 20638, 72462, 67205, 234734, 72662, 54364, 19826, 18114, 433702, 67242, 227715, 28114, 66583, 67039, 20624, 71702, 20492, 106248, 225027, 67958, 67959, 68147, 224907, 52705, 192170, 269061, 225160, 231769, 230908, 28035, 52530, 68278, 66921, 213773, 57750, 50911, 50783, 72544, 216987	376	437	13588	4.13482	4.59741e-14	1.53247e-14	4.57087e-14
22	GOTERM_BP_FAT	GO:0042254~ribosome biogenesis	27	5.16252	2.61009e-17	67134, 104662, 97112, 229937, 68147, 18148, 223499, 225348, 52705, 229317, 192170, 72462, 67205, 67832, 72662, 16418, 52530, 18114, 69902, 227715, 213773, 55989, 57750, 50911, 66583, 216987, 72544	376	112	13588	8.71191	4.42672e-14	2.21336e-14	4.40117e-14
22	GOTERM_CC_FAT	GO:0031981~nuclear lumen	68	13.0019	5.43921e-16	56194, 15182, 223691, 71957, 319944, 22083, 94230, 68703, 212880, 223499, 56637, 107071, 16201, 72462, 67205, 21429, 12387, 67832, 72662, 54364, 56505, 19826, 13018, 18114, 67242, 227715, 55989, 28114, 328365, 66583, 69241, 21665, 78929, 67039, 67134, 104662, 94213, 21417, 97112, 23989, 71702, 244631, 68979, 68147, 18148, 57741, 52874, 52705, 56456, 192170, 18432, 225160, 103573, 18139, 67154, 16…	325	883	12504	2.96288	1.7597e-13	1.7597e-13	7.43849e-13
22	GOTERM_CC_FAT	GO:0005730~nucleolus	38	7.26577	5.69466e-15	67134, 94213, 104662, 97112, 223691, 68979, 68147, 18148, 223499, 107071, 52874, 57741, 52705, 18432, 72462, 16201, 67205, 21429, 67832, 103573, 72662, 54364, 67154, 18114, 52530, 30877, 69902, 213773, 227715, 55989, 28114, 17975, 57750, 50911, 66583, 216987, 72544, 209011	325	310	12504	4.71615	1.7949e-12	8.97393e-13	7.62723e-12
22	GOTERM_CC_FAT	GO:0043233~organelle lumen	76	14.5315	1.41772e-14	56194, 15182, 223691, 71957, 11674, 319944, 22083, 94230, 13897, 68703, 212880, 223499, 56637, 107071, 72462, 16201, 67205, 21429, 11669, 12387, 67832, 272428, 72662, 54364, 56505, 19826, 13018, 18114, 67242, 227715, 55989, 28114, 328365, 66583, 69241, 19683, 21665, 78929, 67039, 67134, 104662, 94213, 21417, 97112, 23989, 71702, 244631, 68979, 68147, 18148, 11611, 57741, 52874, 52705, 56456, 1171…	325	1136	12504	2.57395	4.50484e-12	1.50158e-12	1.91513e-11
22	GOTERM_CC_FAT	GO:0031974~membrane-enclosed lumen	77	14.7228	2.55502e-14	56194, 15182, 223691, 71957, 11674, 319944, 22083, 94230, 13897, 68703, 212880, 223499, 56637, 107071, 72462, 16201, 67205, 21429, 11669, 12387, 67832, 272428, 72662, 54364, 56505, 19826, 13018, 18114, 67242, 227715, 55989, 28114, 328365, 66583, 69241, 19683, 21665, 78929, 67039, 67134, 104662, 94213, 21417, 97112, 23989, 71702, 244631, 68979, 68147, 18148, 67500, 11611, 57741, 52874, 52705, 5645…	325	1174	12504	2.52341	8.09464e-12	2.0236e-12	3.44058e-11
22	GOTERM_CC_FAT	GO:0070013~intracellular organelle lumen	75	14.3403	3.89169e-14	56194, 15182, 223691, 71957, 319944, 22083, 94230, 13897, 68703, 212880, 223499, 56637, 107071, 72462, 16201, 67205, 21429, 11669, 12387, 67832, 272428, 72662, 54364, 56505, 19826, 13018, 18114, 67242, 227715, 55989, 28114, 328365, 66583, 69241, 19683, 21665, 78929, 67039, 67134, 104662, 94213, 21417, 97112, 23989, 71702, 244631, 68979, 68147, 18148, 11611, 57741, 52874, 52705, 56456, 117147, 192…	325	1133	12504	2.54681	1.23531e-11	2.47058e-12	5.25135e-11
22	GOTERM_MF_FAT	GO:0003723~RNA binding	57	10.8987	7.28435e-14	56195, 15569, 80744, 20744, 107508, 19656, 432508, 83486, 94230, 212880, 16589, 20638, 16201, 15384, 72662, 226169, 19826, 433702, 66942, 227715, 28114, 66583, 67842, 27041, 94213, 81702, 71702, 233908, 20492, 73192, 77591, 225027, 67958, 67959, 68147, 18148, 52874, 66660, 52705, 229317, 192170, 269061, 225160, 231769, 231413, 230908, 18139, 103573, 104721, 27050, 52530, 77721, 73826, 17975, 5091…	367	672	13288	3.07114	4.1295e-11	4.1295e-11	1.06737e-10
22	GOTERM_BP_FAT	GO:0034660~ncRNA metabolic process	30	5.73614	2.6575e-13	107045, 71957, 107508, 106248, 20226, 68147, 223499, 85305, 224907, 225348, 52705, 110960, 105148, 192170, 72462, 67205, 234734, 353172, 54364, 72662, 18114, 52530, 227715, 213773, 28114, 57750, 50911, 66583, 216987, 72544	376	202	13588	5.36707	4.50775e-10	1.12694e-10	4.48175e-10
22	GOTERM_BP_FAT	GO:0006364~rRNA processing	17	3.25048	1.2885e-10	72462, 67205, 72662, 52530, 18114, 68147, 223499, 227715, 213773, 225348, 57750, 50911, 52705, 66583, 72544, 216987, 192170	376	74	13588	8.30204	2.1853e-07	4.3706e-08	2.17269e-07
22	GOTERM_BP_FAT	GO:0016072~rRNA metabolic process	17	3.25048	1.59721e-10	72462, 67205, 72662, 52530, 18114, 68147, 223499, 227715, 213773, 225348, 57750, 50911, 52705, 66583, 72544, 216987, 192170	376	75	13588	8.19135	2.70887e-07	4.51479e-08	2.69324e-07
22	GOTERM_BP_FAT	GO:0034470~ncRNA processing	23	4.39771	3.95595e-10	72462, 67205, 234734, 71957, 54364, 72662, 18114, 52530, 106248, 68147, 223499, 227715, 213773, 224907, 225348, 28114, 57750, 52705, 50911, 66583, 72544, 216987, 192170	376	158	13588	5.26064	6.70929e-07	9.58471e-08	6.67057e-07
22	GOTERM_CC_FAT	GO:0030529~ribonucleoprotein complex	36	6.88337	1.14123e-08	56195, 80744, 20624, 71702, 20492, 83486, 432508, 19656, 68147, 67959, 18226, 18148, 223499, 225348, 20638, 52705, 67681, 192170, 72462, 67205, 15384, 103573, 56505, 104721, 27050, 18114, 52530, 69902, 66921, 77721, 67242, 213773, 55989, 17975, 57750, 50783	325	462	12504	2.99796	3.61771e-06	6.02952e-07	1.53785e-05
22	GOTERM_BP_FAT	GO:0006397~mRNA processing	26	4.97132	6.84815e-08	56194, 56195, 80744, 20624, 71702, 20492, 432508, 19656, 83486, 94230, 225027, 67959, 212880, 20638, 192170, 269061, 225160, 230908, 28035, 19826, 433702, 68278, 66921, 67242, 50783, 67039	376	262	13588	3.58624	0.000116138	1.4518e-05	0.000115474
22	GOTERM_CC_FAT	GO:0043228~non-membrane-bounded organelle	85	16.2524	4.28801e-07	13669, 235559, 73178, 15182, 223691, 211401, 20744, 17688, 223499, 18226, 107071, 21335, 72462, 16201, 67205, 21429, 12387, 51869, 67832, 225745, 54364, 72662, 22385, 59015, 18114, 101314, 227715, 55989, 28114, 22147, 66583, 94246, 98932, 67134, 227800, 215280, 104662, 94213, 232906, 21749, 97112, 244631, 56327, 68979, 68147, 18148, 20833, 12879, 232493, 57741, 52874, 56452, 67681, 16667, 52705, …	325	1919	12504	1.70416	0.000135921	1.94184e-05	0.00057782
22	GOTERM_CC_FAT	GO:0043232~intracellular non-membrane-bounded organelle	85	16.2524	4.28801e-07	13669, 235559, 73178, 15182, 223691, 211401, 20744, 17688, 223499, 18226, 107071, 21335, 72462, 16201, 67205, 21429, 12387, 51869, 67832, 225745, 54364, 72662, 22385, 59015, 18114, 101314, 227715, 55989, 28114, 22147, 66583, 94246, 98932, 67134, 227800, 215280, 104662, 94213, 232906, 21749, 97112, 244631, 56327, 68979, 68147, 18148, 20833, 12879, 232493, 57741, 52874, 56452, 67681, 16667, 52705, …	325	1919	12504	1.70416	0.000135921	1.94184e-05	0.00057782
22	GOTERM_CC_FAT	GO:0016604~nuclear body	17	3.25048	8.08459e-07	225160, 56194, 103573, 18139, 71702, 244631, 19826, 52530, 22083, 68147, 18148, 212880, 67242, 328365, 21665, 67039, 192170	325	142	12504	4.60602	0.000256249	2.84753e-05	0.00108942
22	GOTERM_CC_FAT	GO:0005654~nucleoplasm	38	7.26577	8.01711e-07	56194, 21417, 15182, 97112, 23989, 71702, 223691, 244631, 71957, 319944, 22083, 94230, 68703, 68147, 212880, 56637, 18148, 56456, 192170, 225160, 12387, 18139, 103573, 56505, 19826, 13018, 52530, 30877, 67242, 17975, 328365, 57750, 50783, 69241, 192285, 78929, 21665, 67039	325	599	12504	2.44074	0.00025411	3.17673e-05	0.00108032
22	GOTERM_BP_FAT	GO:0016071~mRNA metabolic process	27	5.16252	2.91753e-07	56194, 56195, 80744, 20624, 71702, 20492, 83486, 432508, 19656, 94230, 225027, 67959, 212880, 20638, 192170, 269061, 229512, 225160, 230908, 28035, 19826, 433702, 68278, 66921, 67242, 50783, 67039	376	302	13588	3.23091	0.000494691	5.49777e-05	0.000491956
22	GOTERM_BP_FAT	GO:0008380~RNA splicing	21	4.0153	7.39894e-07	225160, 56194, 56195, 80744, 230908, 20624, 71702, 28035, 19826, 83486, 68278, 19656, 433702, 225027, 66921, 67959, 212880, 67242, 20638, 50783, 192170	376	201	13588	3.77564	0.00125407	0.000125478	0.00124761
22	GOTERM_MF_FAT	GO:0000166~nucleotide binding	98	18.738	4.96019e-07	50995, 107045, 56195, 102632, 83486, 17688, 17217, 270166, 12995, 17215, 56637, 74156, 11947, 53895, 110651, 15525, 12660, 234734, 272428, 93732, 26459, 17995, 22147, 67039, 94213, 232906, 233908, 77591, 224907, 353283, 66660, 110960, 18102, 22589, 14228, 108888, 23996, 12464, 104721, 68278, 30877, 12462, 13424, 209011, 93762, 15569, 227624, 22367, 18971, 107508, 432508, 19656, 233870, 212880, 16…	367	2183	13288	1.62542	0.000281203	0.000140612	0.000726907
22	GOTERM_CC_FAT	GO:0030684~preribosome	6	1.14723	1.22856e-05	18114, 72462, 67205, 213773, 225348, 57750	325	13	12504	17.7572	0.00388698	0.00038938	0.0165539
22	GOTERM_CC_FAT	GO:0016607~nuclear speck	12	2.29446	2.00066e-05	22083, 225160, 56194, 212880, 18148, 18139, 328365, 71702, 244631, 19826, 67039, 192170	325	90	12504	5.12985	0.00632209	0.000576394	0.0269561
22	GOTERM_BP_FAT	GO:0055114~oxidation reduction	41	7.83939	3.7457e-06	70061, 83702, 70337, 56388, 15445, 102294, 105387, 319660, 102632, 20322, 27973, 74032, 224907, 13370, 208665, 14067, 19044, 18432, 237320, 68631, 11669, 13110, 54150, 93732, 18478, 11364, 99586, 216454, 56448, 69113, 433247, 67420, 15494, 17995, 15493, 13097, 19193, 225887, 19683, 13119, 11430	376	672	13588	2.20487	0.00633258	0.000577353	0.00631585
22	GOTERM_BP_FAT	GO:0006913~nucleocytoplasmic transport	13	2.48566	1.26789e-05	18432, 97112, 103573, 15194, 16211, 59015, 433702, 110750, 18148, 56637, 170762, 55989, 19055	376	96	13588	4.89373	0.021274	0.00179036	0.0213772
22	GOTERM_BP_FAT	GO:0051169~nuclear transport	13	2.48566	1.56911e-05	18432, 97112, 103573, 15194, 16211, 59015, 433702, 110750, 18148, 56637, 170762, 55989, 19055	376	98	13588	4.79386	0.0262613	0.00204501	0.0264552
22	KEGG_PATHWAY	mmu03040:Spliceosome	15	2.86807	1.49685e-05	225160, 56194, 20624, 71702, 28035, 433702, 225027, 66921, 67958, 67959, 212880, 20638, 50783, 67039, 192170	171	124	5738	4.05914	0.00218304	0.00218304	0.0177899
22	GOTERM_CC_FAT	GO:0044451~nucleoplasm part	29	5.54493	0.000163373	56194, 21417, 15182, 23989, 71702, 71957, 244631, 319944, 22083, 68703, 68147, 18148, 212880, 56456, 192170, 225160, 12387, 18139, 103573, 56505, 19826, 52530, 67242, 328365, 69241, 192285, 78929, 21665, 67039	325	513	12504	2.17493	0.0504751	0.00430683	0.219926
22	GOTERM_CC_FAT	GO:0005792~microsome	15	2.86807	0.000196066	14377, 56388, 70337, 13110, 13595, 54150, 58249, 18979, 18815, 13370, 13097, 19055, 19683, 18102, 13119	325	176	12504	3.27902	0.0602664	0.00443008	0.263881
22	GOTERM_CC_FAT	GO:0000178~exosome (RNase complex)	5	0.956023	0.000185797	227715, 50911, 66583, 72662, 72544	325	12	12504	16.0308	0.057202	0.00452077	0.250077
22	GOTERM_CC_FAT	GO:0042598~vesicular fraction	15	2.86807	0.000277702	14377, 56388, 70337, 13110, 13595, 54150, 58249, 18979, 18815, 13370, 13097, 19055, 19683, 18102, 13119	325	182	12504	3.17092	0.0842792	0.00585239	0.373564
22	KEGG_PATHWAY	mmu03320:PPAR signaling pathway	11	2.10325	9.841e-05	20280, 22259, 11814, 19013, 12491, 66113, 93732, 26459, 11364, 13119, 11430	171	79	5738	4.67229	0.0142658	0.00715854	0.116906
22	GOTERM_BP_FAT	GO:0046112~nucleobase biosynthetic process	5	0.956023	6.44479e-05	22247, 14450, 69719, 231327, 99586	376	9	13588	20.0768	0.103545	0.00777725	0.108617
22	GOTERM_BP_FAT	GO:0050658~RNA transport	10	1.91205	7.78033e-05	433702, 225160, 103468, 18226, 18148, 170762, 103573, 19386, 59015, 192170	376	66	13588	5.4755	0.123624	0.00875872	0.131112
22	GOTERM_BP_FAT	GO:0051236~establishment of RNA localization	10	1.91205	7.78033e-05	433702, 225160, 103468, 18226, 18148, 170762, 103573, 19386, 59015, 192170	376	66	13588	5.4755	0.123624	0.00875872	0.131112
22	GOTERM_BP_FAT	GO:0050657~nucleic acid transport	10	1.91205	7.78033e-05	433702, 225160, 103468, 18226, 18148, 170762, 103573, 19386, 59015, 192170	376	66	13588	5.4755	0.123624	0.00875872	0.131112
22	GOTERM_BP_FAT	GO:0006403~RNA localization	10	1.91205	8.77227e-05	433702, 225160, 103468, 18226, 18148, 170762, 103573, 19386, 59015, 192170	376	67	13588	5.39378	0.138245	0.00925591	0.147816
22	KEGG_PATHWAY	mmu00970:Aminoacyl-tRNA biosynthesis	8	1.52964	0.000198983	107045, 20226, 85305, 234734, 110960, 353172, 105148, 107508	171	42	5738	6.39153	0.0286364	0.00963807	0.236252
22	GOTERM_CC_FAT	GO:0032994~protein-lipid complex	6	1.14723	0.000571799	11813, 11814, 18979, 66113, 68453, 20211	325	27	12504	8.54974	0.165825	0.011268	0.767773
22	GOTERM_CC_FAT	GO:0034358~plasma lipoprotein particle	6	1.14723	0.000571799	11813, 11814, 18979, 66113, 68453, 20211	325	27	12504	8.54974	0.165825	0.011268	0.767773
22	GOTERM_CC_FAT	GO:0005643~nuclear pore	8	1.52964	0.000788952	110750, 103468, 18226, 170762, 103573, 19386, 16211, 59015	325	59	12504	5.21679	0.221352	0.0146097	1.05792
22	GOTERM_BP_FAT	GO:0015931~nucleobase, nucleoside, nucleotide and nucleic acid transport	10	1.91205	0.000191382	433702, 225160, 103468, 18226, 18148, 170762, 103573, 19386, 59015, 192170	376	74	13588	4.88355	0.277195	0.0189139	0.322222
22	GOTERM_BP_FAT	GO:0006418~tRNA aminoacylation for protein translation	8	1.52964	0.000243866	107045, 20226, 85305, 234734, 110960, 353172, 105148, 107508	376	46	13588	6.28492	0.338766	0.0227184	0.410415
22	GOTERM_BP_FAT	GO:0043038~amino acid activation	8	1.52964	0.000243866	107045, 20226, 85305, 234734, 110960, 353172, 105148, 107508	376	46	13588	6.28492	0.338766	0.0227184	0.410415
22	GOTERM_BP_FAT	GO:0043039~tRNA aminoacylation	8	1.52964	0.000243866	107045, 20226, 85305, 234734, 110960, 353172, 105148, 107508	376	46	13588	6.28492	0.338766	0.0227184	0.410415
22	GOTERM_BP_FAT	GO:0022618~ribonucleoprotein complex assembly	7	1.33843	0.000296631	83486, 104662, 13669, 56195, 67242, 229317, 16418	376	34	13588	7.44024	0.395383	0.0236753	0.499007
22	GOTERM_BP_FAT	GO:0051028~mRNA transport	9	1.72084	0.000287164	433702, 225160, 103468, 18226, 170762, 103573, 19386, 59015, 192170	376	62	13588	5.24588	0.385595	0.0240609	0.483119
22	GOTERM_CC_FAT	GO:0042579~microbody	10	1.91205	0.00149533	20280, 67420, 11611, 20524, 19193, 93732, 67528, 13850, 11430, 102632	325	104	12504	3.69941	0.377727	0.024658	1.99632
22	GOTERM_CC_FAT	GO:0005777~peroxisome	10	1.91205	0.00149533	20280, 67420, 11611, 20524, 19193, 93732, 67528, 13850, 11430, 102632	325	104	12504	3.69941	0.377727	0.024658	1.99632
22	GOTERM_CC_FAT	GO:0005681~spliceosome	11	2.10325	0.00142516	83486, 19656, 66921, 56195, 67242, 80744, 20624, 20638, 71702, 50783, 192170	325	124	12504	3.413	0.363707	0.0248037	1.90346
22	GOTERM_BP_FAT	GO:0006399~tRNA metabolic process	12	2.29446	0.000286233	106248, 107045, 20226, 224907, 85305, 28114, 234734, 110960, 353172, 54364, 105148, 107508	376	113	13588	3.8377	0.384623	0.02523	0.481555
22	GOTERM_CC_FAT	GO:0046930~pore complex	8	1.52964	0.00276932	110750, 103468, 18226, 170762, 103573, 19386, 16211, 59015	325	73	12504	4.21631	0.58484	0.0409974	3.66795
22	GOTERM_CC_FAT	GO:0044452~nucleolar part	5	0.956023	0.00265368	68147, 18148, 223691, 57750, 209011	325	23	12504	8.36388	0.569297	0.0412422	3.51732
22	GOTERM_MF_FAT	GO:0030554~adenyl nucleotide binding	65	12.4283	0.000427083	50995, 107045, 93762, 22367, 107508, 102632, 17688, 17217, 270166, 12995, 17215, 212880, 56637, 16589, 74156, 11947, 17450, 53895, 110651, 105148, 224742, 15525, 12660, 272428, 234734, 93732, 56505, 26459, 22385, 66942, 11430, 13649, 27041, 94213, 81702, 14450, 244631, 69716, 69719, 77591, 20226, 224907, 85305, 235582, 110960, 18102, 56456, 117147, 192170, 22589, 14228, 108888, 23996, 12464, 3531…	367	1535	13288	1.5332	0.215107	0.0472869	0.624062
23	GOTERM_CC_FAT	GO:0031981~nuclear lumen	48	8.85609	2.38911e-07	67134, 72656, 231798, 53975, 56200, 70998, 28000, 15182, 101706, 21849, 108911, 56321, 54451, 30923, 22083, 74035, 56637, 20382, 56070, 225876, 56456, 57261, 14265, 67197, 21429, 69131, 53610, 77065, 12181, 19668, 22059, 103573, 69639, 15432, 67154, 19646, 68276, 18114, 52530, 18813, 70767, 13548, 18519, 50912, 18514, 192285, 72544, 230753	304	883	12504	2.23592	7.57321e-05	7.57321e-05	0.00032194
23	GOTERM_CC_FAT	GO:0031974~membrane-enclosed lumen	54	9.9631	6.01486e-06	72656, 56200, 15182, 101706, 56248, 54451, 30923, 22083, 83945, 56637, 20382, 225876, 21429, 69131, 69639, 15432, 19646, 18114, 50529, 13548, 230753, 67134, 53975, 231798, 70998, 28000, 21849, 108911, 56321, 74035, 30055, 56070, 56456, 57261, 56282, 14265, 67197, 53610, 77065, 22059, 103573, 19668, 12181, 67154, 68276, 18813, 52530, 70767, 18519, 18041, 50912, 18514, 192285, 72544	304	1174	12504	1.89191	0.0019049	0.000476565	0.00810489
23	GOTERM_CC_FAT	GO:0043233~organelle lumen	53	9.7786	5.04758e-06	72656, 56200, 15182, 101706, 56248, 54451, 30923, 22083, 83945, 56637, 20382, 225876, 21429, 69131, 69639, 15432, 19646, 18114, 50529, 13548, 230753, 67134, 53975, 231798, 70998, 28000, 21849, 108911, 56321, 74035, 56070, 56456, 57261, 56282, 14265, 67197, 53610, 77065, 22059, 103573, 19668, 12181, 67154, 68276, 18813, 52530, 70767, 18519, 18041, 50912, 18514, 192285, 72544	304	1136	12504	1.91899	0.00159881	0.00053322	0.00680155
23	GOTERM_CC_FAT	GO:0070013~intracellular organelle lumen	53	9.7786	4.66081e-06	72656, 56200, 15182, 101706, 56248, 54451, 30923, 22083, 83945, 56637, 20382, 225876, 21429, 69131, 69639, 15432, 19646, 18114, 50529, 13548, 230753, 67134, 53975, 231798, 70998, 28000, 21849, 108911, 56321, 74035, 56070, 56456, 57261, 56282, 14265, 67197, 53610, 77065, 22059, 103573, 19668, 12181, 67154, 68276, 18813, 52530, 70767, 18519, 18041, 50912, 18514, 192285, 72544	304	1133	12504	1.92407	0.00147639	0.000738467	0.0062804
23	GOTERM_MF_FAT	GO:0000166~nucleotide binding	88	16.2362	5.2697e-06	76626, 15568, 56200, 18749, 56248, 75141, 17886, 13046, 70047, 228012, 432508, 170791, 21379, 27407, 12305, 75607, 56637, 20382, 16589, 56055, 53895, 15525, 105148, 224742, 13144, 15526, 14186, 14674, 68365, 15384, 67772, 69131, 22213, 73542, 20480, 22385, 66942, 68730, 19718, 74326, 13548, 20869, 23938, 20133, 216965, 236732, 230753, 23972, 13649, 53975, 68087, 228889, 20624, 56325, 20556, 17220…	337	2183	13288	1.58949	0.00231073	0.00231073	0.00744942
23	GOTERM_BP_FAT	GO:0042110~T cell activation	14	2.58303	6.48131e-06	22324, 19264, 77799, 210757, 19934, 22059, 17886, 21473, 16408, 209488, 83945, 16197, 12500, 20315	341	116	13588	4.80918	0.0105154	0.00263927	0.0108774
23	GOTERM_BP_FAT	GO:0001775~cell activation	21	3.87454	3.8074e-06	23880, 21940, 22324, 77799, 14674, 19264, 210757, 19934, 16797, 22059, 17886, 12145, 321019, 21473, 16408, 209488, 83945, 16197, 12500, 20315, 243655	341	246	13588	3.40162	0.00619063	0.00310012	0.00638999
23	GOTERM_BP_FAT	GO:0046649~lymphocyte activation	18	3.32103	6.1773e-06	22324, 21940, 77799, 19264, 210757, 19934, 22059, 17886, 12145, 321019, 21473, 16408, 209488, 83945, 16197, 12500, 20315, 243655	341	191	13588	3.75526	0.0100246	0.00335277	0.0103672
23	GOTERM_BP_FAT	GO:0045321~leukocyte activation	20	3.69004	2.57152e-06	23880, 21940, 22324, 77799, 19264, 210757, 19934, 16797, 22059, 17886, 12145, 321019, 21473, 16408, 209488, 83945, 16197, 12500, 20315, 243655	341	219	13588	3.63904	0.00418537	0.00418537	0.00431584
23	GOTERM_CC_FAT	GO:0005730~nucleolus	21	3.87454	6.78021e-05	67134, 14265, 21429, 56200, 70998, 103573, 22059, 12181, 69639, 21849, 108911, 67154, 56321, 68276, 18813, 52530, 18114, 74035, 50912, 72544, 57261	304	310	12504	2.78633	0.0212646	0.00428957	0.0913267
23	GOTERM_BP_FAT	GO:0006396~RNA processing	28	5.16605	1.47788e-05	72656, 53975, 28000, 20624, 13046, 54451, 70047, 432508, 170791, 20382, 20638, 15547, 66125, 231769, 67197, 53610, 77065, 12181, 69639, 52530, 18813, 68278, 18114, 68730, 70767, 66926, 50912, 72544	341	437	13588	2.55316	0.0238162	0.00480927	0.0248012
23	GOTERM_MF_FAT	GO:0032555~purine ribonucleotide binding	73	13.4686	3.65173e-05	56200, 18749, 75141, 56248, 17886, 70047, 228012, 21379, 27407, 12305, 75607, 56637, 16589, 56055, 53895, 105148, 224742, 13144, 15525, 15526, 14186, 14674, 68365, 67772, 69131, 22213, 73542, 20480, 22385, 66942, 19718, 13548, 20869, 20133, 23938, 216965, 230753, 23972, 13649, 53975, 68087, 228889, 20624, 56325, 20556, 17220, 224624, 21812, 225028, 114873, 215449, 66105, 26407, 23874, 18555, 1015…	337	1796	13288	1.60268	0.0159036	0.00532954	0.0516114
23	GOTERM_MF_FAT	GO:0032553~ribonucleotide binding	73	13.4686	3.65173e-05	56200, 18749, 75141, 56248, 17886, 70047, 228012, 21379, 27407, 12305, 75607, 56637, 16589, 56055, 53895, 105148, 224742, 13144, 15525, 15526, 14186, 14674, 68365, 67772, 69131, 22213, 73542, 20480, 22385, 66942, 19718, 13548, 20869, 20133, 23938, 216965, 230753, 23972, 13649, 53975, 68087, 228889, 20624, 56325, 20556, 17220, 224624, 21812, 225028, 114873, 215449, 66105, 26407, 23874, 18555, 1015…	337	1796	13288	1.60268	0.0159036	0.00532954	0.0516114
23	GOTERM_MF_FAT	GO:0032559~adenyl ribonucleotide binding	62	11.4391	5.0815e-05	56200, 18749, 56248, 17886, 70047, 228012, 27407, 12305, 21379, 75607, 56637, 16589, 53895, 105148, 224742, 13144, 15525, 15526, 14186, 67772, 69131, 22213, 73542, 20480, 22385, 66942, 19718, 13548, 20869, 20133, 23938, 216965, 230753, 23972, 13649, 53975, 68087, 228889, 56325, 20556, 17220, 225028, 21812, 114873, 66105, 26407, 23874, 18555, 101540, 56456, 22589, 12466, 23996, 12464, 22059, 18759…	337	1460	13288	1.67444	0.0220614	0.00556156	0.0718121
23	GOTERM_MF_FAT	GO:0017076~purine nucleotide binding	74	13.6531	7.75845e-05	56200, 18749, 75141, 56248, 17886, 70047, 228012, 21379, 27407, 12305, 75607, 56637, 16589, 56055, 53895, 105148, 224742, 13144, 15525, 15526, 14186, 14674, 68365, 67772, 69131, 22213, 73542, 20480, 22385, 66942, 68730, 19718, 13548, 20869, 20133, 23938, 216965, 230753, 23972, 13649, 53975, 68087, 228889, 20624, 56325, 20556, 17220, 224624, 21812, 225028, 114873, 215449, 66105, 26407, 23874, 1855…	337	1871	13288	1.55951	0.0334874	0.00678903	0.109624
23	GOTERM_MF_FAT	GO:0005524~ATP binding	62	11.4391	3.56829e-05	56200, 18749, 56248, 17886, 70047, 228012, 27407, 12305, 21379, 75607, 56637, 16589, 53895, 105148, 224742, 13144, 15525, 15526, 14186, 67772, 69131, 22213, 73542, 20480, 22385, 66942, 19718, 13548, 20869, 20133, 23938, 216965, 230753, 23972, 13649, 53975, 68087, 228889, 56325, 20556, 17220, 225028, 21812, 114873, 66105, 26407, 23874, 18555, 101540, 56456, 22589, 12466, 23996, 12464, 22059, 18759…	337	1443	13288	1.69416	0.015543	0.00780195	0.0504324
23	GOTERM_MF_FAT	GO:0030554~adenyl nucleotide binding	63	11.6236	0.000115301	56200, 18749, 56248, 17886, 70047, 228012, 27407, 12305, 21379, 75607, 56637, 16589, 53895, 105148, 224742, 13144, 15525, 15526, 14186, 67772, 69131, 22213, 73542, 20480, 22385, 66942, 68730, 19718, 13548, 20869, 20133, 23938, 216965, 230753, 23972, 13649, 53975, 68087, 228889, 56325, 20556, 17220, 225028, 21812, 114873, 66105, 26407, 23874, 18555, 101540, 56456, 22589, 12466, 23996, 12464, 22059…	337	1535	13288	1.61831	0.0493603	0.0084012	0.162876
23	GOTERM_MF_FAT	GO:0001883~purine nucleoside binding	63	11.6236	0.000152165	56200, 18749, 56248, 17886, 70047, 228012, 27407, 12305, 21379, 75607, 56637, 16589, 53895, 105148, 224742, 13144, 15525, 15526, 14186, 67772, 69131, 22213, 73542, 20480, 22385, 66942, 68730, 19718, 13548, 20869, 20133, 23938, 216965, 230753, 23972, 13649, 53975, 68087, 228889, 56325, 20556, 17220, 225028, 21812, 114873, 66105, 26407, 23874, 18555, 101540, 56456, 22589, 12466, 23996, 12464, 22059…	337	1548	13288	1.60472	0.0646229	0.00949825	0.214898
23	GOTERM_MF_FAT	GO:0001882~nucleoside binding	63	11.6236	0.000175795	56200, 18749, 56248, 17886, 70047, 228012, 27407, 12305, 21379, 75607, 56637, 16589, 53895, 105148, 224742, 13144, 15525, 15526, 14186, 67772, 69131, 22213, 73542, 20480, 22385, 66942, 68730, 19718, 13548, 20869, 20133, 23938, 216965, 230753, 23972, 13649, 53975, 68087, 228889, 56325, 20556, 17220, 225028, 21812, 114873, 66105, 26407, 23874, 18555, 101540, 56456, 22589, 12466, 23996, 12464, 22059…	337	1558	13288	1.59442	0.0742775	0.00960121	0.248231
23	GOTERM_MF_FAT	GO:0003723~RNA binding	34	6.27306	0.000202061	76626, 13684, 15568, 56200, 19934, 13046, 54451, 70047, 12192, 432508, 170791, 20382, 16589, 20638, 15547, 23874, 224902, 14265, 240396, 231769, 67197, 15384, 53610, 66870, 103573, 69639, 18813, 66942, 52530, 50529, 50912, 51886, 72544, 236732	337	672	13288	1.99498	0.0848926	0.00980867	0.285271
23	GOTERM_CC_FAT	GO:0005654~nucleoplasm	30	5.53506	0.000302769	72656, 53975, 231798, 15182, 28000, 21849, 54451, 30923, 22083, 56637, 20382, 56456, 225876, 67197, 69131, 77065, 53610, 103573, 19668, 12181, 15432, 19646, 68276, 52530, 70767, 13548, 18519, 18514, 192285, 230753	304	599	12504	2.06001	0.091529	0.0158714	0.407221
23	GOTERM_CC_FAT	GO:0030529~ribonucleoprotein complex	25	4.61255	0.000370409	76626, 53975, 19934, 28000, 20624, 51810, 432508, 67994, 20382, 20638, 66125, 56282, 118451, 67197, 15384, 66242, 103573, 12181, 52530, 18813, 18114, 50529, 74326, 70767, 56463	304	462	12504	2.22573	0.110807	0.0166374	0.497985
23	GOTERM_MF_FAT	GO:0005070~SH3/SH2 adaptor activity	5	0.922509	0.000736271	20400, 209488, 77799, 16797, 107746	337	17	13288	11.5971	0.276274	0.031817	1.03583
23	GOTERM_CC_FAT	GO:0043228~non-membrane-bounded organelle	68	12.5461	0.00100916	108101, 13669, 73178, 19934, 56200, 67665, 15182, 101706, 17886, 16800, 13007, 12721, 21429, 118451, 67772, 66242, 13346, 69639, 22385, 22288, 18114, 50529, 84505, 19718, 21917, 19357, 23938, 94246, 67134, 227800, 238247, 68089, 70998, 21849, 108911, 67886, 56321, 74035, 11518, 67994, 14457, 50775, 79264, 20833, 20129, 218914, 51791, 22589, 57261, 56282, 19891, 445007, 14265, 12181, 22059, 103573…	304	1919	12504	1.4575	0.273899	0.0392185	1.35135
23	GOTERM_CC_FAT	GO:0043232~intracellular non-membrane-bounded organelle	68	12.5461	0.00100916	108101, 13669, 73178, 19934, 56200, 67665, 15182, 101706, 17886, 16800, 13007, 12721, 21429, 118451, 67772, 66242, 13346, 69639, 22385, 22288, 18114, 50529, 84505, 19718, 21917, 19357, 23938, 94246, 67134, 227800, 238247, 68089, 70998, 21849, 108911, 67886, 56321, 74035, 11518, 67994, 14457, 50775, 79264, 20833, 20129, 218914, 51791, 22589, 57261, 56282, 19891, 445007, 14265, 12181, 22059, 103573…	304	1919	12504	1.4575	0.273899	0.0392185	1.35135
23	GOTERM_CC_FAT	GO:0016585~chromatin remodeling complex	7	1.29151	0.00124875	15182, 18519, 19646, 192285, 22385, 56456, 236732	304	50	12504	5.75842	0.327062	0.0430569	1.66969
24	GOTERM_CC_FAT	GO:0031981~nuclear lumen	48	8.85609	2.38911e-07	67134, 72656, 231798, 53975, 56200, 70998, 28000, 15182, 101706, 21849, 108911, 56321, 54451, 30923, 22083, 74035, 56637, 20382, 56070, 225876, 56456, 57261, 14265, 67197, 21429, 69131, 53610, 77065, 12181, 19668, 22059, 103573, 69639, 15432, 67154, 19646, 68276, 18114, 52530, 18813, 70767, 13548, 18519, 50912, 18514, 192285, 72544, 230753	304	883	12504	2.23592	7.57321e-05	7.57321e-05	0.00032194
24	GOTERM_CC_FAT	GO:0031974~membrane-enclosed lumen	54	9.9631	6.01486e-06	72656, 56200, 15182, 101706, 56248, 54451, 30923, 22083, 83945, 56637, 20382, 225876, 21429, 69131, 69639, 15432, 19646, 18114, 50529, 13548, 230753, 67134, 53975, 231798, 70998, 28000, 21849, 108911, 56321, 74035, 30055, 56070, 56456, 57261, 56282, 14265, 67197, 53610, 77065, 22059, 103573, 19668, 12181, 67154, 68276, 18813, 52530, 70767, 18519, 18041, 50912, 18514, 192285, 72544	304	1174	12504	1.89191	0.0019049	0.000476565	0.00810489
24	GOTERM_CC_FAT	GO:0043233~organelle lumen	53	9.7786	5.04758e-06	72656, 56200, 15182, 101706, 56248, 54451, 30923, 22083, 83945, 56637, 20382, 225876, 21429, 69131, 69639, 15432, 19646, 18114, 50529, 13548, 230753, 67134, 53975, 231798, 70998, 28000, 21849, 108911, 56321, 74035, 56070, 56456, 57261, 56282, 14265, 67197, 53610, 77065, 22059, 103573, 19668, 12181, 67154, 68276, 18813, 52530, 70767, 18519, 18041, 50912, 18514, 192285, 72544	304	1136	12504	1.91899	0.00159881	0.00053322	0.00680155
24	GOTERM_CC_FAT	GO:0070013~intracellular organelle lumen	53	9.7786	4.66081e-06	72656, 56200, 15182, 101706, 56248, 54451, 30923, 22083, 83945, 56637, 20382, 225876, 21429, 69131, 69639, 15432, 19646, 18114, 50529, 13548, 230753, 67134, 53975, 231798, 70998, 28000, 21849, 108911, 56321, 74035, 56070, 56456, 57261, 56282, 14265, 67197, 53610, 77065, 22059, 103573, 19668, 12181, 67154, 68276, 18813, 52530, 70767, 18519, 18041, 50912, 18514, 192285, 72544	304	1133	12504	1.92407	0.00147639	0.000738467	0.0062804
24	GOTERM_MF_FAT	GO:0000166~nucleotide binding	88	16.2362	5.2697e-06	76626, 15568, 56200, 18749, 56248, 75141, 17886, 13046, 70047, 228012, 432508, 170791, 21379, 27407, 12305, 75607, 56637, 20382, 16589, 56055, 53895, 15525, 105148, 224742, 13144, 15526, 14186, 14674, 68365, 15384, 67772, 69131, 22213, 73542, 20480, 22385, 66942, 68730, 19718, 74326, 13548, 20869, 23938, 20133, 216965, 236732, 230753, 23972, 13649, 53975, 68087, 228889, 20624, 56325, 20556, 17220…	337	2183	13288	1.58949	0.00231073	0.00231073	0.00744942
24	GOTERM_BP_FAT	GO:0042110~T cell activation	14	2.58303	6.48131e-06	22324, 19264, 77799, 210757, 19934, 22059, 17886, 21473, 16408, 209488, 83945, 16197, 12500, 20315	341	116	13588	4.80918	0.0105154	0.00263927	0.0108774
24	GOTERM_BP_FAT	GO:0001775~cell activation	21	3.87454	3.8074e-06	23880, 21940, 22324, 77799, 14674, 19264, 210757, 19934, 16797, 22059, 17886, 12145, 321019, 21473, 16408, 209488, 83945, 16197, 12500, 20315, 243655	341	246	13588	3.40162	0.00619063	0.00310012	0.00638999
24	GOTERM_BP_FAT	GO:0046649~lymphocyte activation	18	3.32103	6.1773e-06	22324, 21940, 77799, 19264, 210757, 19934, 22059, 17886, 12145, 321019, 21473, 16408, 209488, 83945, 16197, 12500, 20315, 243655	341	191	13588	3.75526	0.0100246	0.00335277	0.0103672
24	GOTERM_BP_FAT	GO:0045321~leukocyte activation	20	3.69004	2.57152e-06	23880, 21940, 22324, 77799, 19264, 210757, 19934, 16797, 22059, 17886, 12145, 321019, 21473, 16408, 209488, 83945, 16197, 12500, 20315, 243655	341	219	13588	3.63904	0.00418537	0.00418537	0.00431584
24	GOTERM_CC_FAT	GO:0005730~nucleolus	21	3.87454	6.78021e-05	67134, 14265, 21429, 56200, 70998, 103573, 22059, 12181, 69639, 21849, 108911, 67154, 56321, 68276, 18813, 52530, 18114, 74035, 50912, 72544, 57261	304	310	12504	2.78633	0.0212646	0.00428957	0.0913267
24	GOTERM_BP_FAT	GO:0006396~RNA processing	28	5.16605	1.47788e-05	72656, 53975, 28000, 20624, 13046, 54451, 70047, 432508, 170791, 20382, 20638, 15547, 66125, 231769, 67197, 53610, 77065, 12181, 69639, 52530, 18813, 68278, 18114, 68730, 70767, 66926, 50912, 72544	341	437	13588	2.55316	0.0238162	0.00480927	0.0248012
24	GOTERM_MF_FAT	GO:0032555~purine ribonucleotide binding	73	13.4686	3.65173e-05	56200, 18749, 75141, 56248, 17886, 70047, 228012, 21379, 27407, 12305, 75607, 56637, 16589, 56055, 53895, 105148, 224742, 13144, 15525, 15526, 14186, 14674, 68365, 67772, 69131, 22213, 73542, 20480, 22385, 66942, 19718, 13548, 20869, 20133, 23938, 216965, 230753, 23972, 13649, 53975, 68087, 228889, 20624, 56325, 20556, 17220, 224624, 21812, 225028, 114873, 215449, 66105, 26407, 23874, 18555, 1015…	337	1796	13288	1.60268	0.0159036	0.00532954	0.0516114
24	GOTERM_MF_FAT	GO:0032553~ribonucleotide binding	73	13.4686	3.65173e-05	56200, 18749, 75141, 56248, 17886, 70047, 228012, 21379, 27407, 12305, 75607, 56637, 16589, 56055, 53895, 105148, 224742, 13144, 15525, 15526, 14186, 14674, 68365, 67772, 69131, 22213, 73542, 20480, 22385, 66942, 19718, 13548, 20869, 20133, 23938, 216965, 230753, 23972, 13649, 53975, 68087, 228889, 20624, 56325, 20556, 17220, 224624, 21812, 225028, 114873, 215449, 66105, 26407, 23874, 18555, 1015…	337	1796	13288	1.60268	0.0159036	0.00532954	0.0516114
24	GOTERM_MF_FAT	GO:0032559~adenyl ribonucleotide binding	62	11.4391	5.0815e-05	56200, 18749, 56248, 17886, 70047, 228012, 27407, 12305, 21379, 75607, 56637, 16589, 53895, 105148, 224742, 13144, 15525, 15526, 14186, 67772, 69131, 22213, 73542, 20480, 22385, 66942, 19718, 13548, 20869, 20133, 23938, 216965, 230753, 23972, 13649, 53975, 68087, 228889, 56325, 20556, 17220, 225028, 21812, 114873, 66105, 26407, 23874, 18555, 101540, 56456, 22589, 12466, 23996, 12464, 22059, 18759…	337	1460	13288	1.67444	0.0220614	0.00556156	0.0718121
24	GOTERM_MF_FAT	GO:0017076~purine nucleotide binding	74	13.6531	7.75845e-05	56200, 18749, 75141, 56248, 17886, 70047, 228012, 21379, 27407, 12305, 75607, 56637, 16589, 56055, 53895, 105148, 224742, 13144, 15525, 15526, 14186, 14674, 68365, 67772, 69131, 22213, 73542, 20480, 22385, 66942, 68730, 19718, 13548, 20869, 20133, 23938, 216965, 230753, 23972, 13649, 53975, 68087, 228889, 20624, 56325, 20556, 17220, 224624, 21812, 225028, 114873, 215449, 66105, 26407, 23874, 1855…	337	1871	13288	1.55951	0.0334874	0.00678903	0.109624
24	GOTERM_MF_FAT	GO:0005524~ATP binding	62	11.4391	3.56829e-05	56200, 18749, 56248, 17886, 70047, 228012, 27407, 12305, 21379, 75607, 56637, 16589, 53895, 105148, 224742, 13144, 15525, 15526, 14186, 67772, 69131, 22213, 73542, 20480, 22385, 66942, 19718, 13548, 20869, 20133, 23938, 216965, 230753, 23972, 13649, 53975, 68087, 228889, 56325, 20556, 17220, 225028, 21812, 114873, 66105, 26407, 23874, 18555, 101540, 56456, 22589, 12466, 23996, 12464, 22059, 18759…	337	1443	13288	1.69416	0.015543	0.00780195	0.0504324
24	GOTERM_MF_FAT	GO:0030554~adenyl nucleotide binding	63	11.6236	0.000115301	56200, 18749, 56248, 17886, 70047, 228012, 27407, 12305, 21379, 75607, 56637, 16589, 53895, 105148, 224742, 13144, 15525, 15526, 14186, 67772, 69131, 22213, 73542, 20480, 22385, 66942, 68730, 19718, 13548, 20869, 20133, 23938, 216965, 230753, 23972, 13649, 53975, 68087, 228889, 56325, 20556, 17220, 225028, 21812, 114873, 66105, 26407, 23874, 18555, 101540, 56456, 22589, 12466, 23996, 12464, 22059…	337	1535	13288	1.61831	0.0493603	0.0084012	0.162876
24	GOTERM_MF_FAT	GO:0001883~purine nucleoside binding	63	11.6236	0.000152165	56200, 18749, 56248, 17886, 70047, 228012, 27407, 12305, 21379, 75607, 56637, 16589, 53895, 105148, 224742, 13144, 15525, 15526, 14186, 67772, 69131, 22213, 73542, 20480, 22385, 66942, 68730, 19718, 13548, 20869, 20133, 23938, 216965, 230753, 23972, 13649, 53975, 68087, 228889, 56325, 20556, 17220, 225028, 21812, 114873, 66105, 26407, 23874, 18555, 101540, 56456, 22589, 12466, 23996, 12464, 22059…	337	1548	13288	1.60472	0.0646229	0.00949825	0.214898
24	GOTERM_MF_FAT	GO:0001882~nucleoside binding	63	11.6236	0.000175795	56200, 18749, 56248, 17886, 70047, 228012, 27407, 12305, 21379, 75607, 56637, 16589, 53895, 105148, 224742, 13144, 15525, 15526, 14186, 67772, 69131, 22213, 73542, 20480, 22385, 66942, 68730, 19718, 13548, 20869, 20133, 23938, 216965, 230753, 23972, 13649, 53975, 68087, 228889, 56325, 20556, 17220, 225028, 21812, 114873, 66105, 26407, 23874, 18555, 101540, 56456, 22589, 12466, 23996, 12464, 22059…	337	1558	13288	1.59442	0.0742775	0.00960121	0.248231
24	GOTERM_MF_FAT	GO:0003723~RNA binding	34	6.27306	0.000202061	76626, 13684, 15568, 56200, 19934, 13046, 54451, 70047, 12192, 432508, 170791, 20382, 16589, 20638, 15547, 23874, 224902, 14265, 240396, 231769, 67197, 15384, 53610, 66870, 103573, 69639, 18813, 66942, 52530, 50529, 50912, 51886, 72544, 236732	337	672	13288	1.99498	0.0848926	0.00980867	0.285271
24	GOTERM_CC_FAT	GO:0005654~nucleoplasm	30	5.53506	0.000302769	72656, 53975, 231798, 15182, 28000, 21849, 54451, 30923, 22083, 56637, 20382, 56456, 225876, 67197, 69131, 77065, 53610, 103573, 19668, 12181, 15432, 19646, 68276, 52530, 70767, 13548, 18519, 18514, 192285, 230753	304	599	12504	2.06001	0.091529	0.0158714	0.407221
24	GOTERM_CC_FAT	GO:0030529~ribonucleoprotein complex	25	4.61255	0.000370409	76626, 53975, 19934, 28000, 20624, 51810, 432508, 67994, 20382, 20638, 66125, 56282, 118451, 67197, 15384, 66242, 103573, 12181, 52530, 18813, 18114, 50529, 74326, 70767, 56463	304	462	12504	2.22573	0.110807	0.0166374	0.497985
24	GOTERM_MF_FAT	GO:0005070~SH3/SH2 adaptor activity	5	0.922509	0.000736271	20400, 209488, 77799, 16797, 107746	337	17	13288	11.5971	0.276274	0.031817	1.03583
24	GOTERM_CC_FAT	GO:0043228~non-membrane-bounded organelle	68	12.5461	0.00100916	108101, 13669, 73178, 19934, 56200, 67665, 15182, 101706, 17886, 16800, 13007, 12721, 21429, 118451, 67772, 66242, 13346, 69639, 22385, 22288, 18114, 50529, 84505, 19718, 21917, 19357, 23938, 94246, 67134, 227800, 238247, 68089, 70998, 21849, 108911, 67886, 56321, 74035, 11518, 67994, 14457, 50775, 79264, 20833, 20129, 218914, 51791, 22589, 57261, 56282, 19891, 445007, 14265, 12181, 22059, 103573…	304	1919	12504	1.4575	0.273899	0.0392185	1.35135
24	GOTERM_CC_FAT	GO:0043232~intracellular non-membrane-bounded organelle	68	12.5461	0.00100916	108101, 13669, 73178, 19934, 56200, 67665, 15182, 101706, 17886, 16800, 13007, 12721, 21429, 118451, 67772, 66242, 13346, 69639, 22385, 22288, 18114, 50529, 84505, 19718, 21917, 19357, 23938, 94246, 67134, 227800, 238247, 68089, 70998, 21849, 108911, 67886, 56321, 74035, 11518, 67994, 14457, 50775, 79264, 20833, 20129, 218914, 51791, 22589, 57261, 56282, 19891, 445007, 14265, 12181, 22059, 103573…	304	1919	12504	1.4575	0.273899	0.0392185	1.35135
24	GOTERM_CC_FAT	GO:0016585~chromatin remodeling complex	7	1.29151	0.00124875	15182, 18519, 19646, 192285, 22385, 56456, 236732	304	50	12504	5.75842	0.327062	0.0430569	1.66969
