# Supplementary material for: A systems-level approach to parental genomic imprinting: the imprinted gene network includes extracellular matrix genes and regulates cell cycle exit and differentiation
Source: HighWire-hosted journal article supplement (doi:10.1101/gr.175919.114), 2015-01-22
Supplement: Table_S13.xlsx [file Table_S13.xlsx]

## Sheet: Table S13
Query Gene	Query GeneID	Coexpressed Gene	Coexpressed GeneID	Mutual Rank	1200-MR
ACSM2B	348158	AGXT2	64902	1	1199
MYH11	4629	LMOD1	25802	1	1199
PEG10	23089	SGCE	8910	1	1199
MYL9	10398	MYLK	4638	1.41	1198.59
KRTAP5-10	387273	KRTAP5-1	387264	1.41	1198.59
FGL1	2267	FGA	2243	1.73	1198.27
C7	730	ADH1B	125	1.73	1198.27
KRTAP5-3	387266	KRTAP5-1	387264	1.73	1198.27
ACSM2B	348158	HAO2	51179	2	1198
ANTXR1	84168	FSTL1	11167	2	1198
MEG3	55384	SNORD113-4	767564	2	1198
SLC22A18AS	5003	SLC22A18	5002	2	1198
NEXN	91624	FILIP1L	11259	2.24	1197.76
COL6A3	1293	COL3A1	1281	2.45	1197.55
CLRN3	119467	ANKS4B	257629	2.45	1197.55
CTAG2	30848	NKX6-3	157848	2.45	1197.55
MIR145	406937	LMOD1	25802	2.45	1197.55
SLC22A12	116085	SLC22A11	55867	2.45	1197.55
PRSS42	339906	PRSS45	377047	2.65	1197.35
APOC3	345	SULT2A1	6822	2.65	1197.35
MYADML2	255275	IQSEC3	440073	2.83	1197.17
LAMA2	3908	FBLN5	10516	2.83	1197.17
RARRES2	5919	SERPINF1	5176	2.83	1197.17
SLC5A10	125206	SLC22A11	55867	3	1197
SNORD114-26	767606	SNORD113-4	767564	3.16	1196.84
COL5A1	1289	COL3A1	1281	3.16	1196.84
HLF	3131	RGN	9104	3.16	1196.84
F9	2158	KNG1	3827	3.16	1196.84
SERPINA6	866	AMBP	259	3.32	1196.68
MMP2	4313	COL6A3	1293	3.46	1196.54
DCN	1634	LAMA2	3908	3.46	1196.54
C20orf151	140893	NKX6-3	157848	3.46	1196.54
RHOJ	57381	DLC1	10395	3.46	1196.54
SLC22A11	55867	CRYAA	1409	3.46	1196.54
DCN	1634	LAMA2	3908	3.46	1196.54
DCN	1634	C1S	716	3.46	1196.54
IQSEC3	440073	CYP2W1	54905	3.61	1196.39
CFH	3075	C1S	716	3.61	1196.39
MYH11	4629	RGS5	8490	3.61	1196.39
GAS2	2620	RGN	9104	3.74	1196.26
FHL1	2273	NEXN	91624	3.74	1196.26
NEXN	91624	MYLK	4638	3.87	1196.13
DDC	1644	ANKS4B	257629	3.87	1196.13
DCN	1634	FBLN5	10516	4	1196
MRC2	9902	EFEMP2	30008	4	1196
NEXN	91624	MYL9	10398	4	1196
SLC22A12	116085	SLC5A10	125206	4	1196
DCN	1634	FBLN5	10516	4	1196
HAO2	51179	AGXT2	64902	4.24	1195.76
DKK3	27122	EFEMP2	30008	4.24	1195.76
DDC	1644	A1CF	29974	4.24	1195.76
COL9A2	1298	COL9A3	1299	4.47	1195.53
DNM1P35	100128285	IQSEC3	440073	4.69	1195.31
FRAS1	80144	GPC3	2719	4.69	1195.31
VIL1	7429	ANKS4B	257629	4.69	1195.31
GABRA5	2558	GABRB3	2562	4.69	1195.31
PON1	5444	F9	2158	4.69	1195.31
ABCG5	64240	APOC3	345	4.8	1195.2
MIR339	442907	GFRA4	64096	4.9	1195.1
NEXN	91624	MSRB3	253827	4.9	1195.1
KLF14	136259	GFRA4	64096	5	1195
MEG3	55384	SNORD114-26	767606	5	1195
MRC2	9902	COL5A1	1289	5.1	1194.9
LMOD1	25802	MYLK	4638	5.29	1194.71
FTCD	10841	SLC26A1	10861	5.29	1194.71
NANOS3	342977	IQSEC3	440073	5.39	1194.61
LMOD1	25802	MYL9	10398	5.48	1194.52
LOC100130857	100130857	KRTAP5-1	387264	5.48	1194.52
MXRA5	25878	COL3A1	1281	5.66	1194.34
FGL1	2267	AMBP	259	5.66	1194.34
SLC17A3	10786	AGXT2	64902	5.66	1194.34
MYH11	4629	MIR145	406937	5.66	1194.34
MADCAM1	8174	GFRA4	64096	5.83	1194.17
KRTAP6-3	337968	KRTAP12-4	386684	5.92	1194.08
DCN	1634	COL3A1	1281	6	1194
FTCD	10841	CRYAA	1409	6	1194
SGCE	8910	FERMT2	10979	6	1194
DCN	1634	COL3A1	1281	6	1194
SSPN	8082	GLT8D2	83468	6.16	1193.84
DCN	1634	COL6A3	1293	6.32	1193.68
GLT8D2	83468	MMP2	4313	6.32	1193.68
SP5	389058	CHST13	166012	6.32	1193.68
ANKS4B	257629	A1CF	29974	6.32	1193.68
MIA2	117153	A1CF	29974	6.32	1193.68
HNF1A	6927	FTCD	10841	6.32	1193.68
DCN	1634	COL6A3	1293	6.32	1193.68
KRTAP5-1	387264	TOPAZ1	375337	6.48	1193.52
SLC5A10	125206	CRYAA	1409	6.48	1193.52
COL16A1	1307	COL5A1	1289	6.63	1193.37
ODF3L2	284451	CYP2W1	54905	6.71	1193.29
MIR210	406992	MIR339	442907	6.71	1193.29
KRTAP5-3	387266	KCNK7	10089	6.71	1193.29
TIMP2	7077	ANTXR1	84168	6.78	1193.22
ESPNL	339768	IQSEC3	440073	6.86	1193.14
NCRNA00083	400797	IQSEC3	440073	6.93	1193.07
COL20A1	57642	IQSEC3	440073	6.93	1193.07
UNC5A	90249	GRM4	2914	6.93	1193.07
EPHX2	2053	RGN	9104	6.93	1193.07
SRRM4	84530	CHRNB2	1141	6.93	1193.07
FHL1	2273	MYL9	10398	6.93	1193.07
DUPD1	338599	TOPAZ1	375337	6.93	1193.07
GATM	2628	IL17RB	55540	7	1193
DCN	1634	ITGBL1	9358	7.07	1192.93
CYP4F2	8529	AGXT2	64902	7.07	1192.93
GP1BB	2812	KRTAP5-1	387264	7.07	1192.93
DCN	1634	ITGBL1	9358	7.07	1192.93
RBP5	83758	ACSM2B	348158	7.35	1192.65
MMP2	4313	COL3A1	1281	7.75	1192.25
FILIP1L	11259	MYLK	4638	7.75	1192.25
MRC2	9902	MMP2	4313	7.75	1192.25
KRTAP5-10	387273	KRTAP5-3	387266	7.75	1192.25
BICC1	80114	GLT8D2	83468	7.87	1192.13
SCGN	10590	TTR	7276	7.87	1192.13
AMBP	259	TTR	7276	7.94	1192.06
ISLR	3671	ITGBL1	9358	8	1192
FTCD	10841	SLC22A11	55867	8	1192
ODF3L2	284451	GFRA4	64096	8.12	1191.88
ACSM2B	348158	A1CF	29974	8.12	1191.88
EFNA2	1943	SP5	389058	8.12	1191.88
PON3	5446	PON1	5444	8.19	1191.81
NCRNA00083	400797	TOPAZ1	375337	8.25	1191.75
GPR139	124274	MIR339	442907	8.25	1191.75
ODF3L2	284451	IQSEC3	440073	8.31	1191.69
MMP2	4313	EFEMP2	30008	8.31	1191.69
C2orf85	285093	GFRA4	64096	8.37	1191.63
PDE1A	5136	LAMA2	3908	8.37	1191.63
KRTAP5-3	387266	GP1BB	2812	8.66	1191.34
ITGBL1	9358	LAMA2	3908	8.77	1191.23
SLC22A12	116085	CRYAA	1409	8.94	1191.06
ACOT11	26027	SLC22A11	55867	8.94	1191.06
KRTAP5-10	387273	LOC100130857	100130857	8.94	1191.06
GPR139	124274	KRTAP12-4	386684	9.17	1190.83
DKK3	27122	MRC2	9902	9.17	1190.83
MYH11	4629	C8orf84	157869	9.17	1190.83
EFEMP1	2202	FSTL1	11167	9.27	1190.73
GREM1	26585	COL6A3	1293	9.27	1190.73
KREMEN2	79412	GFRA4	64096	9.49	1190.51
ITGBL1	9358	FBLN5	10516	9.49	1190.51
AMBP	259	SERPIND1	3053	9.49	1190.51
THY1	7070	MMP2	4313	9.49	1190.51
SSPN	8082	ASPN	54829	9.54	1190.46
HNF1A	6927	SLC26A1	10861	9.64	1190.36
C20orf151	140893	TOPAZ1	375337	9.8	1190.2
ADAMTS13	11093	IQSEC3	440073	10.1	1189.9
SPATC1	375686	GPR139	124274	10.1	1189.9
SLC5A10	125206	FTCD	10841	10.2	1189.8
ANTXR1	84168	GLT8D2	83468	10.2	1189.8
CLRN3	119467	A1CF	29974	10.2	1189.8
F9	2158	OTC	5009	10.2	1189.8
DCN	1634	ISLR	3671	10.2	1189.8
FSTL1	11167	MMP2	4313	10.25	1189.75
PRELP	5549	FBLN5	10516	10.25	1189.75
HNF1A	6927	ANKS4B	257629	10.25	1189.75
PEG3	5178	HLF	3131	10.25	1189.75
CYP2W1	54905	GFRA4	64096	10.39	1189.61
AMBP	259	SLC38A3	10991	10.58	1189.42
BICC1	80114	ANTXR1	84168	10.58	1189.42
FHL1	2273	MYLK	4638	10.58	1189.42
ISLR	3671	COL3A1	1281	10.68	1189.32
DRD5	1816	GPR139	124274	10.68	1189.32
KRTAP6-3	337968	KRTAP5-1	387264	10.86	1189.14
MIR339	442907	KREMEN2	79412	10.95	1189.05
TMEM198	130612	RASL10B	91608	10.95	1189.05
MYH11	4629	MYLK	4638	10.95	1189.05
MXRA5	25878	MMP2	4313	11.18	1188.82
SSPN	8082	LAMA2	3908	11.18	1188.82
ASPN	54829	ITGBL1	9358	11.22	1188.78
PRELP	5549	LMOD1	25802	11.22	1188.78
KRTAP5-3	387266	CTAG2	30848	11.22	1188.78
ABCG5	64240	SULT2A1	6822	11.22	1188.78
MYH11	4629	PRELP	5549	11.22	1188.78
TMEM121	80757	KREMEN2	79412	11.31	1188.69
CYP4F2	8529	HAO2	51179	11.31	1188.69
GREM1	26585	RCN3	57333	11.31	1188.69
SULT2A1	6822	SERPIND1	3053	11.49	1188.51
SLC39A12	221074	CAMK2A	815	11.49	1188.51
RGS5	8490	RCAN2	10231	11.49	1188.51
ITGBL1	9358	COL3A1	1281	11.62	1188.38
NKX6-3	157848	TOPAZ1	375337	11.62	1188.38
ANTXR1	84168	MMP2	4313	11.62	1188.38
FERMT2	10979	FSTL1	11167	11.62	1188.38
GPR62	118442	GFRA4	64096	11.75	1188.25
ACOT11	26027	FTCD	10841	11.75	1188.25
CRAMP1L	57585	KRTAP5-1	387264	11.83	1188.17
MYH11	4629	RCAN2	10231	11.83	1188.17
SLC17A3	10786	ACSM2B	348158	12	1188
RCAN2	10231	LAMA2	3908	12.08	1187.92
CDK5R2	8941	GFRA4	64096	12.17	1187.83
ITGBL1	9358	COL6A3	1293	12.17	1187.83
LOC100128374	100128374	IQSEC3	440073	12.21	1187.79
MSRB3	253827	LMOD1	25802	12.25	1187.75
MST1P9	11223	AMBP	259	12.25	1187.75
KRTAP5-10	387273	KRTAP6-3	337968	12.25	1187.75
IGF2	3481	H19	283120	12.25	1187.75
DLEU7	220107	GFRA4	64096	12.33	1187.67
GJD4	219770	IQSEC3	440073	12.33	1187.67
MSRB3	253827	MYLK	4638	12.37	1187.63
KLF14	136259	MADCAM1	8174	12.37	1187.63
DCN	1634	GLT8D2	83468	12.37	1187.63
TNFRSF4	7293	IQSEC3	440073	12.41	1187.59
NEXN	91624	LMOD1	25802	12.49	1187.51
CSH1	1442	KRTAP12-4	386684	12.49	1187.51
TCEB3C	162699	DRD5	1816	12.53	1187.47
SLC38A4	55089	F9	2158	12.61	1187.39
DNM1P35	100128285	TOPAZ1	375337	12.73	1187.27
KLHL17	339451	HES4	57801	12.73	1187.27
SSPN	8082	ITGBL1	9358	12.81	1187.19
FSTL1	11167	GLT8D2	83468	12.85	1187.15
GLT8D2	83468	ITGBL1	9358	12.96	1187.04
TMEM198	130612	CYP2W1	54905	13.04	1186.96
SMTNL2	342527	GFRA4	64096	13.19	1186.81
ISLR	3671	GLT8D2	83468	13.23	1186.77
CTAG2	30848	MPPED1	758	13.27	1186.73
C20orf151	140893	IQSEC3	440073	13.42	1186.58
SLC26A1	10861	CRYAA	1409	13.42	1186.58
THY1	7070	COL3A1	1281	13.56	1186.44
RCN3	57333	COL3A1	1281	13.6	1186.4
GPR139	124274	IQSEC3	440073	13.75	1186.25
SLC38A3	10991	RGN	9104	13.75	1186.25
VAX2	25806	SRRM3	222183	13.78	1186.22
SERPINA6	866	A1CF	29974	13.86	1186.14
MYH11	4629	MYL9	10398	13.86	1186.14
CTAG2	30848	C20orf151	140893	13.96	1186.04
KNG1	3827	ACSM2B	348158	13.96	1186.04
FSTL1	11167	COL6A3	1293	14	1186
KREMEN2	79412	CDK5R2	8941	14.14	1185.86
TOPAZ1	375337	IQSEC3	440073	14.14	1185.86
RGS5	8490	C8orf84	157869	14.14	1185.86
KRTAP5-10	387273	GP1BB	2812	14.25	1185.75
PRR22	163154	GFRA4	64096	14.35	1185.65
FGA	2243	TTR	7276	14.42	1185.58
HAPLN2	60484	GFRA4	64096	14.46	1185.54
MXRA5	25878	COL6A3	1293	14.49	1185.51
VIL1	7429	A1CF	29974	14.49	1185.51
RNF128	79589	A1CF	29974	14.49	1185.51
KIAA1462	57608	EFEMP2	30008	14.49	1185.51
F9	2158	KLKB1	3818	14.49	1185.51
AIFM3	150209	CYP2W1	54905	14.66	1185.34
LMOD1	25802	FILIP1L	11259	14.7	1185.3
CSH1	1442	DRD5	1816	14.7	1185.3
KCNK7	10089	NKX6-3	157848	14.7	1185.3
APOC3	345	ACSM2B	348158	14.7	1185.3
FHL1	2273	LMOD1	25802	14.73	1185.27
MIR210	406992	GFRA4	64096	14.97	1185.03
SLC17A3	10786	HAO2	51179	14.97	1185.03
CTAG2	30848	TOPAZ1	375337	15.1	1184.9
HES5	388585	KREMEN2	79412	15.2	1184.8
GPR139	124274	NANOS3	342977	15.2	1184.8
RBP5	83758	AGXT2	64902	15.23	1184.77
FUT5	2527	CYP2W1	54905	15.3	1184.7
PPY2	23614	MIR339	442907	15.3	1184.7
KCNK7	10089	KRTAP5-1	387264	15.43	1184.57
C1S	716	FBLN5	10516	15.49	1184.51
SPATC1	375686	MIR339	442907	15.49	1184.51
FILIP1L	11259	RHOJ	57381	15.49	1184.51
THY1	7070	COL6A3	1293	15.49	1184.51
PHLDA2	7262	IER5L	389792	15.49	1184.51
APOC3	345	SERPIND1	3053	15.56	1184.44
FHL1	2273	JAM3	83700	15.56	1184.44
SPPL2C	162540	GFRA4	64096	15.59	1184.41
TPSG1	25823	IQSEC3	440073	15.62	1184.38
MPPED1	758	NKX6-3	157848	15.72	1184.28
ASPN	54829	COL3A1	1281	15.87	1184.13
ACSM2B	348158	PIPOX	51268	15.87	1184.13
APOC3	345	CPN1	1369	15.87	1184.13
VCAN	1462	COL3A1	1281	15.87	1184.13
KREMEN2	79412	CYP2W1	54905	16.06	1183.94
GPR62	118442	KREMEN2	79412	16.12	1183.88
SPPL2C	162540	KRTAP12-4	386684	16.16	1183.84
CECR6	27439	GFRA4	64096	16.19	1183.81
TSHZ3	57616	GLT8D2	83468	16.19	1183.81
CYP4F2	8529	ACSM2B	348158	16.25	1183.75
ADAMTS13	11093	CYP2W1	54905	16.31	1183.69
ACOT11	26027	SLC22A12	116085	16.43	1183.57
ACTL9	284382	TMEM105	284186	16.52	1183.48
RCN3	57333	COL6A3	1293	16.52	1183.48
C20orf185	359710	MIR339	442907	16.55	1183.45
FBLN2	2199	ISLR	3671	16.58	1183.42
DCN	1634	BICC1	80114	16.61	1183.39
MYADML2	255275	CYP2W1	54905	16.73	1183.27
C1S	716	MMP2	4313	16.73	1183.27
ASPN	54829	LAMA2	3908	16.73	1183.27
PEG10	23089	MEST	4232	16.73	1183.27
RBP5	83758	HAO2	51179	16.73	1183.27
MIR339	442907	GPR62	118442	16.88	1183.12
GREM1	26585	MMP2	4313	16.88	1183.12
TSGA10IP	254187	IQSEC3	440073	16.91	1183.09
SRRM3	222183	CDK5R2	8941	16.97	1183.03
ABCG5	64240	OTC	5009	16.97	1183.03
CLDND2	125875	IQSEC3	440073	17.03	1182.97
FAM170B	170370	GPR139	124274	17.03	1182.97
SCT	6343	GFRA4	64096	17.06	1182.94
C20orf185	359710	GFRA4	64096	17.09	1182.91
EFEMP1	2202	FBLN5	10516	17.15	1182.85
RGS5	8490	ASPN	54829	17.2	1182.8
MXRA5	25878	COL5A1	1289	17.23	1182.77
CPN1	1369	AMBP	259	17.23	1182.77
SLC22A12	116085	FTCD	10841	17.23	1182.77
METRN	79006	TMEM121	80757	17.29	1182.71
FGL1	2267	TTR	7276	17.29	1182.71
C1S	716	COL3A1	1281	17.32	1182.68
TSGA10IP	254187	TOPAZ1	375337	17.32	1182.68
THY1	7070	FSTL1	11167	17.32	1182.68
TIMP2	7077	MMP2	4313	17.32	1182.68
MIA2	117153	CLRN3	119467	17.32	1182.68
CLDN19	149461	MIR339	442907	17.32	1182.68
C8G	733	GFRA4	64096	17.35	1182.65
NDN	4692	GLT8D2	83468	17.41	1182.59
KRTAP5-3	387266	MPPED1	758	17.44	1182.56
CAMK2A	815	MT3	4504	17.61	1182.39
VSTM4	196740	DLC1	10395	17.66	1182.34
FHL1	2273	FERMT2	10979	17.66	1182.34
KRTAP5-1	387264	IQSEC3	440073	17.75	1182.25
TIMP2	7077	TIMP3	7078	17.75	1182.25
MTHFD2L	441024	GFRA4	64096	17.8	1182.2
KCNG4	93107	IQSEC3	440073	17.83	1182.17
TGFB3	7043	ASPN	54829	17.83	1182.17
KNG1	3827	APOC3	345	17.89	1182.11
MSRB3	253827	MYL9	10398	17.94	1182.06
KRTAP5-3	387266	NKX6-3	157848	17.94	1182.06
FGA	2243	AMBP	259	18	1182
C2orf85	285093	MIR339	442907	18.03	1181.97
FBLN2	2199	COL5A1	1289	18.11	1181.89
SERPINA6	866	SLC38A3	10991	18.11	1181.89
DLEU7	220107	KREMEN2	79412	18.17	1181.83
A1CF	29974	TTR	7276	18.17	1181.83
KRTAP5-1	387264	NCRNA00083	400797	18.17	1181.83
DEGS2	123099	TTLL10	254173	18.17	1181.83
KRTAP5-3	387266	TOPAZ1	375337	18.17	1181.83
TRPM5	29850	IQSEC3	440073	18.38	1181.62
RCN3	57333	THY1	7070	18.44	1181.56
COL5A1	1289	COL6A3	1293	18.57	1181.43
ISLR	3671	EFEMP2	30008	18.65	1181.35
MSRB3	253827	FBLN5	10516	18.73	1181.27
AGXT2	64902	PIPOX	51268	18.97	1181.03
APOC3	345	AMBP	259	18.97	1181.03
GRM4	2914	IQSEC3	440073	19.03	1180.97
SERPINA6	866	TTR	7276	19.08	1180.92
TSGA10IP	254187	C20orf151	140893	19.08	1180.92
FGF2	2247	FSTL1	11167	19.21	1180.79
DEGS2	123099	KREMEN2	79412	19.29	1180.71
SRMS	6725	IQSEC3	440073	19.29	1180.71
FHL1	2273	FBLN5	10516	19.29	1180.71
PON1	5444	KNG1	3827	19.34	1180.66
AMBP	259	A1CF	29974	19.36	1180.64
MYL9	10398	FSTL1	11167	19.44	1180.56
MRC2	9902	COL3A1	1281	19.44	1180.56
ADM2	79924	GFRA4	64096	19.49	1180.51
PRELP	5549	RCAN2	10231	19.49	1180.51
LOC389493	389493	IQSEC3	440073	19.54	1180.46
VAX2	25806	NKX6-3	157848	19.6	1180.4
FLJ11235	54508	GPR62	118442	19.62	1180.38
SPATC1	375686	GFRA4	64096	19.67	1180.33
SLC26A1	10861	CYP2W1	54905	19.7	1180.3
SLC38A3	10991	PIPOX	51268	19.75	1180.25
POM121L12	285877	GFRA4	64096	19.8	1180.2
LOC441208	441208	PEX11G	92960	19.8	1180.2
MIR210	406992	KREMEN2	79412	19.9	1180.1
ANTXR1	84168	COL3A1	1281	19.9	1180.1
JAM3	83700	ANTXR1	84168	19.9	1180.1
RCN3	57333	EFEMP2	30008	19.9	1180.1
DNM1P35	100128285	NCRNA00083	400797	19.97	1180.03
BICC1	80114	FBLN5	10516	20.07	1179.93
APOC3	345	A1CF	29974	20.07	1179.93
NANOS3	342977	ADAMTS13	11093	20.15	1179.85
KNG1	3827	OTC	5009	20.17	1179.83
MIR339	442907	ADAMTS13	11093	20.2	1179.8
APOC3	345	SERPINA6	866	20.35	1179.65
FAM110B	90362	RCAN2	10231	20.37	1179.63
PRR7	80758	KREMEN2	79412	20.49	1179.51
DCN	1634	MMP2	4313	20.49	1179.51
GLT8D2	83468	COL3A1	1281	20.49	1179.51
KCNK7	10089	CRAMP1L	57585	20.49	1179.51
DCN	1634	MMP2	4313	20.49	1179.51
OTC	5009	APOC3	345	20.59	1179.41
CPN1	1369	SERPIND1	3053	20.62	1179.38
PRELP	5549	LAMA2	3908	20.71	1179.29
SPATC1	375686	MIR210	406992	20.78	1179.22
ANTXR1	84168	EFEMP1	2202	20.78	1179.22
VIL1	7429	CLRN3	119467	20.78	1179.22
KRTAP5-1	387264	KRTAP12-4	386684	20.83	1179.17
DKK3	27122	MYLK	4638	20.9	1179.1
DCN	1634	TIMP3	7078	20.98	1179.02
MPPED1	758	C20orf151	140893	20.98	1179.02
SPRNP1	399833	NKX6-3	157848	20.98	1179.02
DCN	1634	TIMP3	7078	20.98	1179.02
FERMT2	10979	ANTXR1	84168	21	1179
MYL9	10398	EFEMP2	30008	21.02	1178.98
PEG10	23089	FRAS1	80144	21.02	1178.98
SCNN1D	6339	GFRA4	64096	21.07	1178.93
MEST	4232	CPA4	51200	21.14	1178.86
ODF3L2	284451	SRRM3	222183	21.17	1178.83
GLT8D2	83468	COL6A3	1293	21.17	1178.83
LOC441208	441208	HES4	57801	21.21	1178.79
CLRN3	119467	AGXT2	64902	21.33	1178.67
PRELP	5549	ITGBL1	9358	21.45	1178.55
HPR	3250	APOC3	345	21.45	1178.55
DCN	1634	CFH	3075	21.45	1178.55
SCT	6343	MADCAM1	8174	21.49	1178.51
GREM1	26585	THY1	7070	21.54	1178.46
F9	2158	SULT2A1	6822	21.54	1178.46
LAMA2	3908	COL6A3	1293	21.63	1178.37
ANTXR1	84168	C1S	716	21.63	1178.37
MIR210	406992	GPR62	118442	21.75	1178.25
TPSG1	25823	GPR139	124274	21.77	1178.23
MXRA5	25878	ASPN	54829	21.91	1178.09
HLF	3131	GPC3	2719	21.91	1178.09
KNG1	3827	KLKB1	3818	21.91	1178.09
IGFBP5	3488	MXRA5	25878	21.91	1178.09
RADIL	55698	GFRA4	64096	21.93	1178.07
A1CF	29974	GAS2	2620	21.98	1178.02
MIR145	406937	MYLK	4638	22	1178
LOC441208	441208	ARIH2	10425	22	1178
FILIP1L	11259	DLC1	10395	22.05	1177.95
TSGA10IP	254187	NKX6-3	157848	22.09	1177.91
GLT8D2	83468	C1S	716	22.25	1177.75
SLC5A10	125206	SLC26A1	10861	22.45	1177.55
DCN	1634	SERPINF1	5176	22.45	1177.55
SP5	389058	CYP2W1	54905	22.54	1177.46
ESPNL	339768	GFRA4	64096	22.58	1177.42
MIR145	406937	DLC1	10395	22.58	1177.42
TGFB3	7043	COL3A1	1281	22.58	1177.42
SMTNL2	342527	MIR339	442907	22.65	1177.35
DCN	1634	PTGFR	5737	22.65	1177.35
JAM3	83700	MYL9	10398	22.76	1177.24
GRM4	2914	SRRM3	222183	22.8	1177.2
C20orf151	140893	NCRNA00083	400797	22.8	1177.2
JAM3	83700	FSTL1	11167	22.8	1177.2
ASPN	54829	GLT8D2	83468	22.85	1177.15
CPN1	1369	SULT2A1	6822	22.91	1177.09
SPRNP1	399833	MPPED1	758	23.07	1176.93
FHL1	2273	MSRB3	253827	23.22	1176.78
EFEMP2	30008	COL3A1	1281	23.24	1176.76
GPR139	124274	ADAMTS13	11093	23.24	1176.76
EFEMP1	2202	ITGBL1	9358	23.24	1176.76
AMBP	259	SULT2A1	6822	23.32	1176.68
RASL10B	91608	SRRM3	222183	23.37	1176.63
GPR139	124274	GFRA4	64096	23.37	1176.63
SLC38A4	55089	KNG1	3827	23.43	1176.57
KRTAP5-3	387266	C20orf151	140893	23.45	1176.55
THY1	7070	MXRA5	25878	23.47	1176.53
COL9A3	1299	NKX6-3	157848	23.47	1176.53
MXRA5	25878	ISLR	3671	23.49	1176.51
NRXN2	9379	CDK5R2	8941	23.49	1176.51
MYL9	10398	FILIP1L	11259	23.66	1176.34
PRSS45	377047	MYADML2	255275	23.66	1176.34
F9	2158	APOC3	345	23.66	1176.34
FILIP1L	11259	ASPN	54829	23.69	1176.31
PON3	5446	FGA	2243	23.75	1176.25
CLDN19	149461	GPR139	124274	23.81	1176.19
GPR139	124274	MADCAM1	8174	23.87	1176.13
ZNF524	147807	ADM2	79924	24	1176
ASB16	92591	IQSEC3	440073	24.12	1175.88
MYADML2	255275	ODF3L2	284451	24.15	1175.85
ASB16	92591	MYADML2	255275	24.17	1175.83
THY1	7070	EFEMP2	30008	24.19	1175.81
TIGD3	220359	GFRA4	64096	24.21	1175.79
DUPD1	338599	IQSEC3	440073	24.25	1175.75
PON1	5444	OTC	5009	24.25	1175.75
VSTM4	196740	ISLR	3671	24.29	1175.71
ACOT11	26027	CRYAA	1409	24.37	1175.63
MT3	4504	IQSEC3	440073	24.41	1175.59
CYP26C1	340665	GPR62	118442	24.49	1175.51
CTAG2	30848	COL9A3	1299	24.49	1175.51
HPR	3250	SERPIND1	3053	24.49	1175.51
LOC100131763	100131763	IQSEC3	440073	24.56	1175.44
DUPD1	338599	C20orf151	140893	24.56	1175.44
TTLL10	254173	GFRA4	64096	24.68	1175.32
SRRM3	222183	IQSEC3	440073	24.7	1175.3
C1S	716	COL6A3	1293	24.74	1175.26
NPFFR1	64106	GFRA4	64096	24.78	1175.22
GLT8D2	83468	LAMA2	3908	24.8	1175.2
A1CF	29974	RGN	9104	24.86	1175.14
NUDT18	79873	VPS37D	155382	24.96	1175.04
VCAN	1462	MMP2	4313	24.98	1175.02
KCNQ1DN	55539	KRTAP12-4	386684	25	1175
ADH1B	125	FBLN5	10516	25.04	1174.96
TBX10	347853	IQSEC3	440073	25.06	1174.94
TTR	7276	SERPIND1	3053	25.1	1174.9
IGFBP5	3488	COL3A1	1281	25.1	1174.9
LPPR1	54886	SERPIND1	3053	25.14	1174.86
EXOSC6	118460	EFNA2	1943	25.3	1174.7
LOC100129484	100129484	GFRA4	64096	25.3	1174.7
TIGD3	220359	KREMEN2	79412	25.4	1174.6
OTC	5009	KLKB1	3818	25.69	1174.31
LYZL4	131375	MIR339	442907	25.73	1174.27
ADAMTS13	11093	GFRA4	64096	25.92	1174.08
NKX6-1	4825	GFRA4	64096	25.92	1174.08
MRC2	9902	FBLN2	2199	25.92	1174.08
MRC2	9902	MXRA5	25878	26	1174
CRAMP1L	57585	ADAMTS13	11093	26.08	1173.92
C1S	716	LAMA2	3908	26.12	1173.88
ACTL9	284382	GFRA4	64096	26.15	1173.85
TPSG1	25823	KRTAP5-1	387264	26.15	1173.85
C1QTNF7	114905	LMOD1	25802	26.17	1173.83
LAMA2	3908	COL3A1	1281	26.38	1173.62
RHOJ	57381	FBLN5	10516	26.38	1173.62
BICC1	80114	MSRB3	253827	26.38	1173.62
FHL1	2273	FSTL1	11167	26.38	1173.62
HNF1A	6927	SLC22A11	55867	26.4	1173.6
AGXT2	64902	A1CF	29974	26.46	1173.54
SSPN	8082	RHOJ	57381	26.46	1173.54
SPPL2C	162540	CYP2W1	54905	26.46	1173.54
VCAN	1462	FSTL1	11167	26.5	1173.5
ISLR	3671	MMP2	4313	26.55	1173.45
EFEMP2	30008	DLC1	10395	26.83	1173.17
FSTL1	11167	COL3A1	1281	26.83	1173.17
LPPR1	54886	PIPOX	51268	26.83	1173.17
FUT5	2527	IQSEC3	440073	26.83	1173.17
SLC26A1	10861	SLC22A11	55867	26.87	1173.13
ACOT11	26027	SLC5A10	125206	26.87	1173.13
SRMS	6725	CYP2W1	54905	26.91	1173.09
GPR62	118442	CDK5R2	8941	26.94	1173.06
SSPN	8082	FBLN5	10516	26.98	1173.02
CTAG2	30848	KCNK7	10089	27.13	1172.87
TSHZ3	57616	COL6A3	1293	27.13	1172.87
FBLN2	2199	LAMA2	3908	27.2	1172.8
LOC100130857	100130857	KRTAP6-3	337968	27.28	1172.72
MIR145	406937	MYL9	10398	27.5	1172.5
LOC100129484	100129484	CRAMP1L	57585	27.57	1172.43
MRC2	9902	COL6A3	1293	27.66	1172.34
ADAMTS7	11173	GFRA4	64096	27.68	1172.32
SLC26A1	10861	IQSEC3	440073	27.71	1172.29
ABCG5	64240	CPN1	1369	27.71	1172.29
BICC1	80114	COL6A3	1293	27.75	1172.25
TIMP3	7078	COL6A3	1293	27.82	1172.18
TIMP2	7077	FBLN5	10516	27.82	1172.18
FERMT2	10979	NEXN	91624	27.84	1172.16
HTR2A	3356	ASPN	54829	27.87	1172.13
IQSEC3	440073	GFRA4	64096	27.93	1172.07
COL20A1	57642	MYADML2	255275	27.93	1172.07
HLF	3131	SERPIND1	3053	27.93	1172.07
FGA	2243	SERPIND1	3053	27.93	1172.07
LOC100128374	100128374	GFRA4	64096	27.96	1172.04
CRAMP1L	57585	IQSEC3	440073	28	1172
TNFRSF4	7293	GFRA4	64096	28.21	1171.79
NCRNA00083	400797	CYP2W1	54905	28.25	1171.75
TIMP3	7078	MYLK	4638	28.28	1171.72
PCDH8	5100	SRRM3	222183	28.35	1171.65
SERPINA6	866	SERPIND1	3053	28.37	1171.63
KLF14	136259	SCT	6343	28.46	1171.54
GLT8D2	83468	EFEMP2	30008	28.5	1171.5
MYH11	4629	FILIP1L	11259	28.57	1171.43
MT3	4504	GPR139	124274	28.64	1171.36
C8G	733	KREMEN2	79412	28.67	1171.33
MYH11	4629	C1QTNF7	114905	28.71	1171.29
DCN	1634	DLC1	10395	28.72	1171.28
SCNN1D	6339	MIR339	442907	28.72	1171.28
DCN	1634	DLC1	10395	28.72	1171.28
ZNF524	147807	GFRA4	64096	28.77	1171.23
KCNK7	10089	C20orf151	140893	28.77	1171.23
SERPINF1	5176	C1S	716	28.86	1171.14
KIAA1462	57608	DLC1	10395	28.86	1171.14
TSHZ3	57616	VCAN	1462	28.86	1171.14
MIR339	442907	MADCAM1	8174	28.91	1171.09
CILP2	148113	NKX6-1	4825	28.98	1171.02
RXFP3	51289	GPR62	118442	28.98	1171.02
TMEM105	284186	TOPAZ1	375337	28.98	1171.02
KLHL17	339451	VPS37D	155382	28.98	1171.02
SCNN1D	6339	GPR139	124274	28.98	1171.02
CYP4F2	8529	A1CF	29974	28.98	1171.02
PRSS42	339906	MYADML2	255275	28.98	1171.02
KNG1	3827	HAO2	51179	28.98	1171.02
UNC5A	90249	CDK5R2	8941	29.02	1170.98
RCN3	57333	COL5A1	1289	29.09	1170.91
HPR	3250	AMBP	259	29.1	1170.9
APOC3	345	TTR	7276	29.19	1170.81
GPR139	124274	C20orf185	359710	29.24	1170.76
EFEMP1	2202	GLT8D2	83468	29.29	1170.71
KCNK9	51305	ZP1	22917	29.29	1170.71
F9	2158	ACSM2B	348158	29.46	1170.54
MSRB3	253827	FILIP1L	11259	29.5	1170.5
RCN3	57333	ISLR	3671	29.58	1170.42
METTL7B	196410	AGXT2	64902	29.65	1170.35
DKK3	27122	COL5A1	1289	29.66	1170.34
MSRB3	253827	DLC1	10395	29.66	1170.34
NKX6-3	157848	IQSEC3	440073	29.7	1170.3
TTBK1	84630	IQSEC3	440073	29.7	1170.3
LMOD1	25802	RCAN2	10231	29.73	1170.27
LRRC4B	94030	CDK5R2	8941	29.77	1170.23
IER5L	389792	GFRA4	64096	29.8	1170.2
TTBK1	84630	GFRA4	64096	29.83	1170.17
TIMP3	7078	MMP2	4313	29.85	1170.15
LPPR1	54886	HLF	3131	29.85	1170.15
DUPD1	338599	MYADML2	255275	29.85	1170.15
PTGFR	5737	COL6A3	1293	29.87	1170.13
CYP26C1	340665	VPS37D	155382	29.93	1170.07
COL5A1	1289	MMP2	4313	30	1170
SRRM4	84530	NRXN2	9379	30	1170
CDKN1C	1028	HES4	57801	30.07	1169.93
SNAI3	333929	KREMEN2	79412	30.08	1169.92
FTCD	10841	PIPOX	51268	30.17	1169.83
KCNK7	10089	TOPAZ1	375337	30.17	1169.83
KNG1	3827	SULT2A1	6822	30.17	1169.83
C6orf227	401253	GFRA4	64096	30.2	1169.8
SPRNP1	399833	C20orf151	140893	30.3	1169.7
SLC22A2	6582	SLC22A11	55867	30.43	1169.57
HES4	57801	GPR62	118442	30.46	1169.54
PPY2	23614	GFRA4	64096	30.46	1169.54
RGS5	8490	RHOJ	57381	30.5	1169.5
CECR6	27439	MADCAM1	8174	30.63	1169.37
HES5	388585	CDK5R2	8941	30.71	1169.29
CHST13	166012	TMEM121	80757	30.79	1169.21
RBMXL2	27288	KREMEN2	79412	30.94	1169.06
PPY2	23614	GPR139	124274	30.98	1169.02
PEG3	5178	LGR5	8549	30.98	1169.02
KRTAP6-3	337968	CSH1	1442	31.02	1168.98
KRTAP5-3	387266	PRSS42	339906	31.02	1168.98
SLC38A3	10991	TTR	7276	31.08	1168.92
C20orf151	140893	CRAMP1L	57585	31.18	1168.82
BICC1	80114	FSTL1	11167	31.24	1168.76
MST1P9	11223	SERPIND1	3053	31.3	1168.7
DDC	1644	VIL1	7429	31.37	1168.63
CPN1	1369	SERPINA6	866	31.4	1168.6
KCNG4	93107	TOPAZ1	375337	31.42	1168.58
EXOSC6	118460	IER5L	389792	31.42	1168.58
LOC441208	441208	VPS37D	155382	31.45	1168.55
COL5A1	1289	EFEMP2	30008	31.46	1168.54
CFH	3075	EFEMP1	2202	31.46	1168.54
KCNK9	51305	CDK5R2	8941	31.54	1168.46
SGCE	8910	ANTXR1	84168	31.65	1168.35
DLC1	10395	LAMA2	3908	31.75	1168.25
EFEMP2	30008	COL6A3	1293	31.75	1168.25
UBE3A	7337	CASD1	64921	31.75	1168.25
TOPAZ1	375337	ODF3L2	284451	31.86	1168.14
PEX11G	92960	VPS37D	155382	31.94	1168.06
VCAN	1462	THY1	7070	31.94	1168.06
FBLN2	2199	COL3A1	1281	31.97	1168.03
CDX1	1044	GPR62	118442	31.98	1168.02
PRSS45	377047	KRTAP12-4	386684	32.03	1167.97
LOC441208	441208	RBMXL2	27288	32.03	1167.97
CLDND2	125875	TOPAZ1	375337	32.09	1167.91
PTGFR	5737	BICC1	80114	32.09	1167.91
DCN	1634	EFEMP1	2202	32.12	1167.88
CRAMP1L	57585	TOPAZ1	375337	32.17	1167.83
MYL9	10398	TIMP3	7078	32.17	1167.83
AVP	551	GFRA4	64096	32.19	1167.81
NRTN	4902	HES4	57801	32.25	1167.75
FSTL1	11167	C1S	716	32.25	1167.75
C20orf151	140893	SRRM3	222183	32.4	1167.6
FTCD	10841	AGXT2	64902	32.5	1167.5
KCNG4	93107	MYADML2	255275	32.62	1167.38
RBP5	83758	SLC22A12	116085	32.62	1167.38
ESPNL	339768	CYP2W1	54905	32.68	1167.32
DCN	1634	TIMP2	7077	32.73	1167.27
SERPINA6	866	SULT2A1	6822	32.79	1167.21
TIMP3	7078	EFEMP2	30008	32.83	1167.17
NANOS3	342977	DNM1P35	100128285	32.86	1167.14
SCNN1D	6339	ADAMTS13	11093	32.86	1167.14
LOC100128374	100128374	CYP2W1	54905	32.94	1167.06
NEXN	91624	FSTL1	11167	32.98	1167.02
EFEMP1	2202	C1S	716	33.14	1166.86
PON2	5445	PON3	5446	33.14	1166.86
PRELP	5549	FBLN2	2199	33.17	1166.83
TIGD3	220359	IQSEC3	440073	33.23	1166.77
FHL1	2273	FGF2	2247	33.23	1166.77
PEG3	5178	LPPR1	54886	33.23	1166.77
RBMXL2	27288	GPR62	118442	33.26	1166.74
TIMP2	7077	MSRB3	253827	33.32	1166.68
ANTXR1	84168	COL6A3	1293	33.36	1166.64
DCN	1634	PDE1A	5136	33.5	1166.5
NRTN	4902	SRRM3	222183	33.57	1166.43
NRXN2	9379	GRM4	2914	33.57	1166.43
LOC100130857	100130857	KRTAP12-4	386684	33.59	1166.41
GP1BB	2812	KCNK7	10089	33.59	1166.41
KLF14	136259	HAPLN2	60484	33.59	1166.41
ADM2	79924	MADCAM1	8174	33.66	1166.34
MIR145	406937	MSRB3	253827	33.67	1166.33
SPRNP1	399833	CTAG2	30848	33.67	1166.33
DCN	1634	ASPN	54829	33.75	1166.25
MIR210	406992	SMTNL2	342527	33.76	1166.24
DNM1P35	100128285	CYP2W1	54905	33.76	1166.24
SLC39A12	221074	AIFM3	150209	33.76	1166.24
FUT5	2527	KRTAP5-1	387264	34	1166
FLJ11235	54508	PEX11G	92960	34.07	1165.93
MYADML2	255275	GFRA4	64096	34.09	1165.91
PRR7	80758	GFRA4	64096	34.21	1165.79
FGL1	2267	A1CF	29974	34.21	1165.79
F9	2158	HAO2	51179	34.21	1165.79
DCN	1634	PGCP	10404	34.21	1165.79
HES5	388585	GFRA4	64096	34.29	1165.71
TMEM121	80757	GPR62	118442	34.29	1165.71
TIGD3	220359	CYP2W1	54905	34.29	1165.71
HES4	57801	PEX11G	92960	34.32	1165.68
MNX1	3110	HES4	57801	34.34	1165.66
LPPR1	54886	A1CF	29974	34.34	1165.66
DRD5	1816	KRTAP5-1	387264	34.39	1165.61
AMBP	259	RGN	9104	34.63	1165.37
OTC	5009	SULT2A1	6822	34.64	1165.36
CPN1	1369	TTR	7276	34.7	1165.3
C1QTNF7	114905	DLC1	10395	34.7	1165.3
FUT5	2527	TOPAZ1	375337	34.79	1165.21
PRELP	5549	ASPN	54829	34.9	1165.1
MYH11	4629	FHL1	2273	34.9	1165.1
COL9A3	1299	C20orf151	140893	34.94	1165.06
JAM3	83700	MYLK	4638	34.96	1165.04
ANTXR1	84168	ASPN	54829	34.99	1165.01
CPLX1	10815	CDK5R2	8941	35.07	1164.93
TP73	7161	TTLL10	254173	35.1	1164.9
DUPD1	338599	NKX6-3	157848	35.14	1164.86
ISLR	3671	COL6A3	1293	35.2	1164.8
THY1	7070	GLT8D2	83468	35.24	1164.76
NCRNA00083	400797	MYADML2	255275	35.31	1164.69
COL20A1	57642	NCRNA00083	400797	35.33	1164.67
DNM1P35	100128285	KREMEN2	79412	35.36	1164.64
DKK3	27122	MMP2	4313	35.47	1164.53
PEX11G	92960	GPR62	118442	35.5	1164.5
TIMP2	7077	C1S	716	35.5	1164.5
PIPOX	51268	A1CF	29974	35.72	1164.28
PGCP	10404	FBLN5	10516	35.83	1164.17
TOPAZ1	375337	MYADML2	255275	35.89	1164.11
RBP5	83758	FTCD	10841	35.92	1164.08
SPRNP1	399833	CDX1	1044	35.94	1164.06
METTL7B	196410	ANKS4B	257629	36	1164
NDN	4692	EFEMP2	30008	36.04	1163.96
RNF128	79589	ANKS4B	257629	36.06	1163.94
SLC22A12	116085	AGXT2	64902	36.06	1163.94
C7	730	FBLN5	10516	36.08	1163.92
LYZL4	131375	C20orf185	359710	36.18	1163.82
DCN	1634	ANTXR1	84168	36.22	1163.78
TTR	7276	RGN	9104	36.33	1163.67
FSTL1	11167	MYLK	4638	36.33	1163.67
ANTXR1	84168	MXRA5	25878	36.33	1163.67
C8orf84	157869	CNTN4	152330	36.33	1163.67
METTL7B	196410	A1CF	29974	36.33	1163.67
SSPN	8082	ISLR	3671	36.37	1163.63
ABCG5	64240	AMBP	259	36.4	1163.6
ABCG5	64240	A1CF	29974	36.41	1163.59
SGCE	8910	BICC1	80114	36.41	1163.59
NKX6-1	4825	MIR339	442907	36.5	1163.5
MYLK	4638	COL6A3	1293	36.5	1163.5
FGF2	2247	C1S	716	36.61	1163.39
PEG3	5178	GPC3	2719	36.66	1163.34
ADM2	79924	MIR339	442907	36.74	1163.26
FOXL2	668	KREMEN2	79412	36.74	1163.26
PLAGL1	5325	MSRB3	253827	36.82	1163.18
NRTN	4902	VPS37D	155382	36.88	1163.12
DUPD1	338599	NCRNA00083	400797	36.88	1163.12
DCN	1634	PLAGL1	5325	36.88	1163.12
THY1	7070	MYL9	10398	36.99	1163.01
ANTXR1	84168	SSPN	8082	37.11	1162.89
MIR145	406937	NEXN	91624	37.12	1162.88
PGCP	10404	C1S	716	37.15	1162.85
HPR	3250	SULT2A1	6822	37.23	1162.77
SERPINA6	866	RGN	9104	37.31	1162.69
MIR145	406937	FILIP1L	11259	37.34	1162.66
SRRM3	222183	GFRA4	64096	37.35	1162.65
CLDND2	125875	C20orf151	140893	37.35	1162.65
IGFBP5	3488	FBLN5	10516	37.42	1162.58
ITGBL1	9358	EFEMP2	30008	37.47	1162.53
PRR7	80758	CDK5R2	8941	37.47	1162.53
ADAMTS13	11093	KREMEN2	79412	37.55	1162.45
ATP10A	57194	COL5A1	1289	37.55	1162.45
TSHZ3	57616	MMP2	4313	37.6	1162.4
LIM2	3982	GFRA4	64096	37.62	1162.38
NANOS3	342977	NCRNA00083	400797	37.79	1162.21
KCNQ1DN	55539	IQSEC3	440073	37.95	1162.05
VWA1	64856	TMEM121	80757	37.96	1162.04
CYP26C1	340665	KREMEN2	79412	38.08	1161.92
BICC1	80114	C1S	716	38.08	1161.92
LOC389493	389493	GFRA4	64096	38.11	1161.89
PEG10	23089	GPC3	2719	38.11	1161.89
PRR22	163154	ZNF524	147807	38.18	1161.82
SLC38A3	10991	GAS2	2620	38.34	1161.66
RCN3	57333	MRC2	9902	38.34	1161.66
ANTXR1	84168	THY1	7070	38.52	1161.48
CDKN1C	1028	LOC441208	441208	38.57	1161.43
DLEU7	220107	CDK5R2	8941	38.68	1161.32
ADH1B	125	PRELP	5549	38.78	1161.22
SGCE	8910	FSTL1	11167	38.78	1161.22
GPR139	124274	CYP2W1	54905	38.83	1161.17
PRR22	163154	NKX6-1	4825	38.83	1161.17
AMBP	259	PIPOX	51268	38.83	1161.17
LPPR1	54886	GPC3	2719	38.88	1161.12
CSH1	1442	MADCAM1	8174	38.88	1161.12
TMEM105	284186	ODF3L2	284451	38.92	1161.08
NKX6-3	157848	CRAMP1L	57585	38.96	1161.04
SRRM4	84530	UNC5A	90249	38.99	1161.01
CLDND2	125875	CRAMP1L	57585	39.05	1160.95
FGL1	2267	SERPINA6	866	39.05	1160.95
KLKB1	3818	PIPOX	51268	39.12	1160.88
MXRA5	25878	GLT8D2	83468	39.19	1160.81
GREM1	26585	EFEMP2	30008	39.23	1160.77
MYLK	4638	EFEMP2	30008	39.24	1160.76
AGXT2	64902	SLC22A11	55867	39.24	1160.76
VAX2	25806	RASL10B	91608	39.24	1160.76
TIMP2	7077	FSTL1	11167	39.24	1160.76
PRELP	5549	ISLR	3671	39.26	1160.74
PRSS42	339906	MPPED1	758	39.26	1160.74
GREM1	26585	COL3A1	1281	39.33	1160.67
MST1P9	11223	CPN1	1369	39.42	1160.58
FOXL2	668	GFRA4	64096	39.56	1160.44
TBX10	347853	GFRA4	64096	39.61	1160.39
SLC17A3	10786	METTL7B	196410	39.65	1160.35
CILP2	148113	GFRA4	64096	39.94	1160.06
FBLN2	2199	EFEMP2	30008	39.95	1160.05
GRM4	2914	CYP2W1	54905	40	1160
BARX1	56033	GFRA4	64096	40.02	1159.98
LGR5	8549	GPC3	2719	40.02	1159.98
PRSS42	339906	TOPAZ1	375337	40.06	1159.94
KCNK7	10089	MPPED1	758	40.07	1159.93
TMEM198	130612	SP5	389058	40.07	1159.93
TPSG1	25823	KRTAP12-4	386684	40.1	1159.9
FUT5	2527	KREMEN2	79412	40.1	1159.9
KRTAP5-1	387264	NANOS3	342977	40.12	1159.88
NDN	4692	MMP2	4313	40.15	1159.85
HPR	3250	KNG1	3827	40.19	1159.81
CLDND2	125875	CYP2W1	54905	40.2	1159.8
CPN1	1369	A1CF	29974	40.21	1159.79
RARRES2	5919	GPC3	2719	40.21	1159.79
RHOJ	57381	ASPN	54829	40.25	1159.75
PRELP	5549	SSPN	8082	40.25	1159.75
TGFB3	7043	MXRA5	25878	40.3	1159.7
TTBK1	84630	CDK5R2	8941	40.31	1159.69
EFNA2	1943	VAX2	25806	40.31	1159.69
ACOT11	26027	AGXT2	64902	40.31	1159.69
CHSY3	337876	COL3A1	1281	40.37	1159.63
ADAMTS7	11173	GPR62	118442	40.4	1159.6
TMEM105	284186	GFRA4	64096	40.47	1159.53
COL9A3	1299	VAX2	25806	40.47	1159.53
COL20A1	57642	CYP2W1	54905	40.62	1159.38
APOC3	345	SLC38A3	10991	40.62	1159.38
ODF3L2	284451	KREMEN2	79412	40.74	1159.26
DNM1P35	100128285	ADAMTS13	11093	40.8	1159.2
TPSG1	25823	ADAMTS13	11093	40.82	1159.18
DNM1P35	100128285	GFRA4	64096	40.91	1159.09
KIAA1462	57608	ITGBL1	9358	40.91	1159.09
ANTXR1	84168	ITGBL1	9358	40.95	1159.05
PRSS45	377047	CRAMP1L	57585	41.11	1158.89
SRMS	6725	ODF3L2	284451	41.11	1158.89
KCNQ1DN	55539	CSH1	1442	41.13	1158.87
ZNF517	340385	PEX11G	92960	41.23	1158.77
PON1	5444	KLKB1	3818	41.28	1158.72
TRPM5	29850	TOPAZ1	375337	41.33	1158.67
ZNF517	340385	VPS37D	155382	41.35	1158.65
CYP4F2	8529	PIPOX	51268	41.35	1158.65
DEGS2	123099	MIR339	442907	41.46	1158.54
C1QTNF7	114905	PRELP	5549	41.56	1158.44
ESPNL	339768	KREMEN2	79412	41.59	1158.41
CLDN19	149461	GFRA4	64096	41.64	1158.36
TMEM121	80757	HES5	388585	41.67	1158.33
KIAA1462	57608	MMP2	4313	41.69	1158.31
KCNG4	93107	KRTAP5-1	387264	41.76	1158.24
TOPAZ1	375337	CYP2W1	54905	41.83	1158.17
RXFP3	51289	KREMEN2	79412	41.86	1158.14
MPPED1	758	TOPAZ1	375337	41.89	1158.11
SGCE	8910	GLT8D2	83468	41.89	1158.11
COL20A1	57642	TOPAZ1	375337	42	1158
BICC1	80114	COL3A1	1281	42.04	1157.96
CPN1	1369	SLC38A3	10991	42.05	1157.95
MIR339	442907	CYP2W1	54905	42.07	1157.93
HLF	3131	SLC38A3	10991	42.14	1157.86
SRMS	6725	GFRA4	64096	42.18	1157.82
ESPNL	339768	MYADML2	255275	42.25	1157.75
SSPN	8082	COL3A1	1281	42.25	1157.75
PRR22	163154	SCT	6343	42.33	1157.67
LIM2	3982	IQSEC3	440073	42.34	1157.66
MPPED1	758	CDX1	1044	42.43	1157.57
IGF2	3481	DCN	1634	42.5	1157.5
TBX10	347853	KRTAP12-4	386684	42.52	1157.48
COL20A1	57642	GFRA4	64096	42.57	1157.43
ARIH2	10425	VPS37D	155382	42.6	1157.4
TBX10	347853	CYP2W1	54905	42.66	1157.34
FBLN2	2199	ITGBL1	9358	42.71	1157.29
RGS5	8490	C7	730	42.71	1157.29
MIA2	117153	OTC	5009	42.74	1157.26
RBPMS	11030	MYL9	10398	42.78	1157.22
A1CF	29974	SERPIND1	3053	42.81	1157.19
TIMP3	7078	DLC1	10395	42.9	1157.1
PANX2	56666	CDK5R2	8941	42.9	1157.1
KLF14	136259	CECR6	27439	42.99	1157.01
KNG1	3827	AMBP	259	43	1157
MMP2	4313	ITGBL1	9358	43.08	1156.92
C7	730	LAMA2	3908	43.36	1156.64
RNF128	79589	CLRN3	119467	43.42	1156.58
COL9A3	1299	TOPAZ1	375337	43.47	1156.53
MST1P9	11223	SLC38A3	10991	43.47	1156.53
DCN	1634	VSTM4	196740	43.47	1156.53
ISLR	3671	FBLN5	10516	43.5	1156.5
C2CD4B	388125	GFRA4	64096	43.54	1156.46
CYP26C1	340665	GFRA4	64096	43.58	1156.42
ABCG5	64240	SERPIND1	3053	43.59	1156.41
LPPR1	54886	GAS2	2620	44	1156
MSRB3	253827	COL6A3	1293	44.02	1155.98
SLC38A3	10991	A1CF	29974	44.05	1155.95
PRR7	80758	TMEM121	80757	44.08	1155.92
SSPN	8082	EFEMP2	30008	44.09	1155.91
MPPED1	758	CRAMP1L	57585	44.12	1155.88
MIR145	406937	RHOJ	57381	44.16	1155.84
PRSS42	339906	NKX6-3	157848	44.19	1155.81
LOC100129484	100129484	KREMEN2	79412	44.19	1155.81
COL5A1	1289	ITGBL1	9358	44.28	1155.72
ZNF517	340385	HES4	57801	44.28	1155.72
MSRB3	253827	GLT8D2	83468	44.45	1155.55
MST1P9	11223	SERPINA6	866	44.45	1155.55
KLHL17	339451	NRTN	4902	44.5	1155.5
MADCAM1	8174	IQSEC3	440073	44.59	1155.41
PRR7	80758	MIR339	442907	44.67	1155.33
TRPM5	29850	ODF3L2	284451	44.72	1155.28
UNC5A	90249	NRXN2	9379	44.79	1155.21
EFEMP2	30008	FBLN5	10516	44.83	1155.17
LIM2	3982	CYP2W1	54905	44.9	1155.1
OTC	5009	CLRN3	119467	44.9	1155.1
FUT5	2527	NCRNA00083	400797	44.99	1155.01
BICC1	80114	MMP2	4313	45.13	1154.87
MSRB3	253827	DKK3	27122	45.17	1154.83
HNF1A	6927	SLC5A10	125206	45.21	1154.79
IGFBP5	3488	SSPN	8082	45.23	1154.77
PDE1A	5136	FBLN5	10516	45.28	1154.72
COL20A1	57642	DNM1P35	100128285	45.38	1154.62
APOC3	345	PIPOX	51268	45.43	1154.57
APOC3	345	MST1P9	11223	45.43	1154.57
ZNF517	340385	KLHL17	339451	45.5	1154.5
GLT8D2	83468	FBLN5	10516	45.54	1154.46
MMP2	4313	LAMA2	3908	45.6	1154.4
DKK3	27122	COL3A1	1281	45.6	1154.4
FUT5	2527	DNM1P35	100128285	45.61	1154.39
COL9A2	1298	C20orf151	140893	45.72	1154.28
TGFB3	7043	SSPN	8082	45.72	1154.28
MIR339	442907	CDK5R2	8941	45.73	1154.27
KRTAP5-3	387266	CRAMP1L	57585	45.73	1154.27
FGA	2243	SULT2A1	6822	45.83	1154.17
CFH	3075	GLT8D2	83468	45.83	1154.17
RBP5	83758	PIPOX	51268	45.83	1154.17
FGA	2243	CPN1	1369	45.89	1154.11
FERMT2	10979	TIMP2	7077	45.89	1154.11
SLC17A3	10786	CYP4F2	8529	45.9	1154.1
HES5	388585	GPR62	118442	45.91	1154.09
SLC17A3	10786	CLRN3	119467	45.91	1154.09
APOC3	345	CYP4F2	8529	45.96	1154.04
ZNF524	147807	SCT	6343	46.1	1153.9
APOC3	345	FGA	2243	46.13	1153.87
RGS5	8490	MIR145	406937	46.13	1153.87
GPR139	124274	MIR210	406992	46.17	1153.83
TSGA10IP	254187	NCRNA00083	400797	46.18	1153.82
VPS37D	155382	KREMEN2	79412	46.2	1153.8
HNF1A	6927	VIL1	7429	46.22	1153.78
CECR6	27439	CDK5R2	8941	46.28	1153.72
ACSM2B	348158	SULT2A1	6822	46.31	1153.69
RGS5	8490	FILIP1L	11259	46.31	1153.69
FGL1	2267	SERPIND1	3053	46.43	1153.57
HNF1A	6927	CRYAA	1409	46.43	1153.57
IGFBP5	3488	TGFB3	7043	46.43	1153.57
FAM170B	170370	KRTAP12-4	386684	46.47	1153.53
DEGS2	123099	GFRA4	64096	46.48	1153.52
CLDND2	125875	KRTAP5-1	387264	46.5	1153.5
CDX1	1044	PEX11G	92960	46.58	1153.42
JAM3	83700	GLT8D2	83468	46.58	1153.42
PEG3	5178	DLK1	8788	46.58	1153.42
TMEM198	130612	GFRA4	64096	46.6	1153.4
DCN	1634	RCN3	57333	46.67	1153.33
FTCD	10841	ACSM2B	348158	46.73	1153.27
HNF1A	6927	CYP2W1	54905	46.78	1153.22
HNF1A	6927	SP5	389058	46.79	1153.21
NANOS3	342977	GFRA4	64096	46.86	1153.14
AMBP	259	GAS2	2620	46.86	1153.14
COL16A1	1307	FBLN2	2199	46.86	1153.14
ANKS4B	257629	AGXT2	64902	46.9	1153.1
MIR339	442907	CECR6	27439	46.95	1153.05
LPPR1	54886	CPN1	1369	46.99	1153.01
FOXL2	668	IER5L	389792	46.99	1153.01
POM121L12	285877	IQSEC3	440073	47.03	1152.97
VPS37D	155382	GPR62	118442	47.17	1152.83
JAM3	83700	LAMA2	3908	47.19	1152.81
TIMP2	7077	COL6A3	1293	47.23	1152.77
KLF14	136259	GPR62	118442	47.25	1152.75
VPS37D	155382	TMEM121	80757	47.33	1152.67
SSPN	8082	MXRA5	25878	47.37	1152.63
DCN	1634	ENPP2	5168	47.37	1152.63
COL20A1	57642	ODF3L2	284451	47.48	1152.52
DCN	1634	FSTL1	11167	47.48	1152.52
FLJ11235	54508	KREMEN2	79412	47.54	1152.46
GABRG3	2567	GABRA5	2558	47.55	1152.45
CLRN3	119467	ACSM2B	348158	47.59	1152.41
HAO2	51179	PIPOX	51268	47.62	1152.38
ACSM2B	348158	SERPINA6	866	47.62	1152.38
FGL1	2267	GAS2	2620	47.72	1152.28
MIR210	406992	HES5	388585	47.75	1152.25
PON1	5444	APOC3	345	47.75	1152.25
KNG1	3827	A1CF	29974	47.83	1152.17
TPSG1	25823	NANOS3	342977	47.91	1152.09
HPR	3250	FGA	2243	47.91	1152.09
MSRB3	253827	FSTL1	11167	47.92	1152.08
OSBPL5	114879	MRC2	9902	47.95	1152.05
PACSIN1	29993	SRRM3	222183	47.96	1152.04
FHL1	2273	MIR145	406937	47.97	1152.03
KCNG4	93107	NCRNA00083	400797	48	1152
ANKS4B	257629	PIPOX	51268	48.15	1151.85
PACSIN1	29993	CPLX1	10815	48.18	1151.82
RCAN2	10231	FBLN5	10516	48.22	1151.78
KIAA1462	57608	MSRB3	253827	48.22	1151.78
HPR	3250	F9	2158	48.22	1151.78
IL17RB	55540	PIPOX	51268	48.25	1151.75
GABRG3	2567	SLC39A12	221074	48.25	1151.75
KLF14	136259	MIR339	442907	48.28	1151.72
MIA2	117153	SERPINA6	866	48.29	1151.71
TMEM105	284186	CYP2W1	54905	48.34	1151.66
ANTXR1	84168	LAMA2	3908	48.34	1151.66
MIA2	117153	FGA	2243	48.34	1151.66
DCN	1634	EFEMP2	30008	48.37	1151.63
DCN	1634	EFEMP2	30008	48.37	1151.63
OTC	5009	A1CF	29974	48.4	1151.6
KNG1	3827	AGXT2	64902	48.48	1151.52
SPPL2C	162540	MADCAM1	8174	48.5	1151.5
TTLL10	254173	IQSEC3	440073	48.53	1151.47
RBMXL2	27288	VPS37D	155382	48.58	1151.42
KRTAP5-10	387273	KRTAP12-4	386684	48.64	1151.36
KNG1	3827	SERPINA6	866	48.74	1151.26
IGFBP5	3488	ANTXR1	84168	48.74	1151.26
RBP5	83758	SLC17A3	10786	48.74	1151.26
KIAA1462	57608	TIMP3	7078	48.86	1151.14
NANOS3	342977	CYP2W1	54905	48.93	1151.07
PON3	5446	FGL1	2267	48.99	1151.01
ZNF517	340385	GFRA4	64096	49.14	1150.86
DKK3	27122	FBLN2	2199	49.3	1150.7
LOC441208	441208	TMEM121	80757	49.38	1150.62
DLGAP2	9228	CDK5R2	8941	49.39	1150.61
MXRA5	25878	EFEMP2	30008	49.48	1150.52
SPPL2C	162540	C20orf185	359710	49.5	1150.5
DLEU7	220107	MIR339	442907	49.6	1150.4
DUPD1	338599	CTAG2	30848	49.64	1150.36
ARIH2	10425	RBMXL2	27288	49.7	1150.3
DCN	1634	SSPN	8082	49.72	1150.28
NDN	4692	FBLN5	10516	49.78	1150.22
FBLN2	2199	FBLN5	10516	49.79	1150.21
CNTN4	152330	RCAN2	10231	49.8	1150.2
NRXN2	9379	MT3	4504	49.84	1150.16
ANKS4B	257629	ACSM2B	348158	49.84	1150.16
SMTNL2	342527	MADCAM1	8174	49.92	1150.08
PANX2	56666	NRTN	4902	49.97	1150.03
FHL1	2273	ADH1B	125	50.2	1149.8
RGS5	8490	PDE1A	5136	50.2	1149.8
DRD5	1816	KRTAP12-4	386684	50.25	1149.75
C2orf85	285093	NKX6-1	4825	50.28	1149.72
C1S	716	MYLK	4638	50.37	1149.63
PRR22	163154	CILP2	148113	50.42	1149.58
SERPINF1	5176	ISLR	3671	50.44	1149.56
C1S	716	ITGBL1	9358	50.48	1149.52
HAO2	51179	A1CF	29974	50.53	1149.47
RGS5	8490	DLC1	10395	50.53	1149.47
VPS37D	155382	GFRA4	64096	50.56	1149.44
SULT2A1	6822	TTR	7276	50.56	1149.44
RBPMS	11030	MYLK	4638	50.61	1149.39
MYLK	4638	FBLN5	10516	50.62	1149.38
VCAN	1462	COL6A3	1293	50.65	1149.35
C8orf84	157869	FBLN2	2199	50.65	1149.35
KNG1	3827	FGL1	2267	50.73	1149.27
AVP	551	CDK5R2	8941	50.79	1149.21
FLJ11235	54508	HES4	57801	50.82	1149.18
DKK3	27122	MYL9	10398	50.82	1149.18
RXFP3	51289	SRRM3	222183	50.83	1149.17
VSTM4	196740	FBLN5	10516	50.89	1149.11
MRC2	9902	ISLR	3671	50.96	1149.04
GREM1	26585	DKK3	27122	50.99	1149.01
VCAN	1462	ANTXR1	84168	50.99	1149.01
SPATC1	375686	ADAMTS13	11093	51.03	1148.97
FERMT2	10979	RBPMS	11030	51.17	1148.83
CHRNB2	1141	UNC5A	90249	51.21	1148.79
ENPP2	5168	C1S	716	51.23	1148.77
EPHX2	2053	KLKB1	3818	51.24	1148.76
KCNK7	10089	IQSEC3	440073	51.27	1148.73
MT3	4504	MADCAM1	8174	51.3	1148.7
SRMS	6725	KREMEN2	79412	51.32	1148.68
GPR62	118442	ODF3L2	284451	51.33	1148.67
RCN3	57333	MMP2	4313	51.33	1148.67
UTS2R	2837	GFRA4	64096	51.37	1148.63
MSRB3	253827	COL3A1	1281	51.38	1148.62
PON3	5446	A1CF	29974	51.44	1148.56
ISLR	3671	C1S	716	51.48	1148.52
NKX6-1	4825	CDK5R2	8941	51.5	1148.5
ANTXR1	84168	FBLN5	10516	51.53	1148.47
DRD5	1816	IQSEC3	440073	51.54	1148.46
SULT2A1	6822	RGN	9104	51.59	1148.41
PPY2	23614	KRTAP12-4	386684	51.59	1148.41
VIL1	7429	AMBP	259	51.59	1148.41
FOXL2	668	CDK5R2	8941	51.61	1148.39
TGFB3	7043	GLT8D2	83468	51.62	1148.38
MIR210	406992	ADAMTS13	11093	51.63	1148.37
VAX2	25806	ODF3L2	284451	51.65	1148.35
ESPNL	339768	GPR62	118442	51.69	1148.31
LYZL4	131375	GFRA4	64096	51.69	1148.31
TRPM5	29850	CYP2W1	54905	51.73	1148.27
MYH11	4629	NEXN	91624	51.76	1148.24
ATP10A	57194	ITGBL1	9358	51.77	1148.23
SRRM3	222183	CYP2W1	54905	51.85	1148.15
SNAI3	333929	GFRA4	64096	51.87	1148.13
C2orf85	285093	PRR22	163154	51.96	1148.04
TIMP2	7077	COL3A1	1281	52	1148
KNG1	3827	CYP4F2	8529	52.02	1147.98
PHLDA2	7262	METRN	79006	52.08	1147.92
RGS5	8490	LAMA2	3908	52.15	1147.85
RADIL	55698	KREMEN2	79412	52.31	1147.69
PTGFR	5737	ITGBL1	9358	52.31	1147.69
MIA2	117153	RNF128	79589	52.31	1147.69
NRXN2	9379	SRRM3	222183	52.44	1147.56
METTL7B	196410	CLRN3	119467	52.44	1147.56
SPPL2C	162540	GPR139	124274	52.45	1147.55
APOC3	345	AGXT2	64902	52.46	1147.54
AIFM3	150209	CDK5R2	8941	52.52	1147.48
FLJ11235	54508	MIR339	442907	52.53	1147.47
GREM1	26585	COL5A1	1289	52.53	1147.47
MSRB3	253827	RHOJ	57381	52.58	1147.42
FAM170B	170370	IQSEC3	440073	52.58	1147.42
NRTN	4902	KREMEN2	79412	52.64	1147.36
SCNN1D	6339	SPATC1	375686	52.65	1147.35
IGF2	3481	LGR5	8549	52.65	1147.35
SSPN	8082	LMOD1	25802	52.66	1147.34
ARIH2	10425	C12orf61	283416	52.67	1147.33
ASB16	92591	GFRA4	64096	52.73	1147.27
C20orf185	359710	IQSEC3	440073	52.75	1147.25
HES4	57801	VPS37D	155382	52.76	1147.24
NRXN2	9379	LRRC4B	94030	52.76	1147.24
FAM170B	170370	GFRA4	64096	52.77	1147.23
FBLN2	2199	ASPN	54829	52.87	1147.13
DKK3	27122	TIMP3	7078	52.96	1147.04
MYADML2	255275	SRRM3	222183	52.99	1147.01
ESPNL	339768	MADCAM1	8174	52.99	1147.01
ISLR	3671	TIMP3	7078	52.99	1147.01
SERPINA6	866	GAS2	2620	52.99	1147.01
LOC441208	441208	KREMEN2	79412	53.07	1146.93
PTGFR	5737	GLT8D2	83468	53.11	1146.89
RTN4RL2	349667	CDK5R2	8941	53.18	1146.82
TSHZ3	57616	MXRA5	25878	53.19	1146.81
MYH11	4629	C7	730	53.22	1146.78
PRR22	163154	ADM2	79924	53.33	1146.67
NCRNA00083	400797	ADAMTS13	11093	53.39	1146.61
MXRA5	25878	C1S	716	53.4	1146.6
KRTAP5-1	387264	ADAMTS13	11093	53.44	1146.56
SNAI3	333929	CDK5R2	8941	53.44	1146.56
METRN	79006	VPS37D	155382	53.44	1146.56
KIAA1462	57608	FBLN5	10516	53.44	1146.56
VCAN	1462	GLT8D2	83468	53.48	1146.52
C2orf85	285093	KRTAP12-4	386684	53.57	1146.43
FGL1	2267	CPN1	1369	53.57	1146.43
FERMT2	10979	FBLN5	10516	53.58	1146.42
KLHL17	339451	GFRA4	64096	53.6	1146.4
ACSM2B	348158	AMBP	259	53.67	1146.33
PRSS42	339906	CRAMP1L	57585	53.67	1146.33
KNG1	3827	CPN1	1369	53.67	1146.33
BARX1	56033	CDK5R2	8941	53.68	1146.32
IGFBP5	3488	LAMA2	3908	53.7	1146.3
GPR62	118442	CYP2W1	54905	53.89	1146.11
VPS37D	155382	SRRM3	222183	53.89	1146.11
GJD4	219770	GFRA4	64096	53.94	1146.06
CYP26C1	340665	ODF3L2	284451	53.96	1146.04
RXFP3	51289	GFRA4	64096	53.96	1146.04
KIAA1462	57608	MRC2	9902	54	1146
ODF3L2	284451	CDK5R2	8941	54.04	1145.96
FBN2	2201	MSRB3	253827	54.04	1145.96
DKK3	27122	THY1	7070	54.11	1145.89
PDE1A	5136	ASPN	54829	54.11	1145.89
SP5	389058	VWA1	64856	54.11	1145.89
PTGFR	5737	EFEMP1	2202	54.11	1145.89
FGL1	2267	SULT2A1	6822	54.26	1145.74
ANTXR1	84168	TIMP3	7078	54.27	1145.73
KREMEN2	79412	IQSEC3	440073	54.3	1145.7
SULT2A1	6822	A1CF	29974	54.31	1145.69
ABCG5	64240	ACSM2B	348158	54.39	1145.61
FSTL1	11167	EFEMP2	30008	54.42	1145.58
ANTXR1	84168	MYLK	4638	54.44	1145.56
DCN	1634	MXRA5	25878	54.47	1145.53
ACTL9	284382	TOPAZ1	375337	54.48	1145.52
IGFBP5	3488	VSTM4	196740	54.54	1145.46
SLC38A4	55089	TTR	7276	54.54	1145.46
SLC39A12	221074	GRM1	2911	54.55	1145.45
NKX6-3	157848	SRRM3	222183	54.61	1145.39
KNG1	3827	SERPIND1	3053	54.68	1145.32
DRD5	1816	C20orf185	359710	54.8	1145.2
NANOS3	342977	TOPAZ1	375337	54.84	1145.16
CDKN1C	1028	GPR62	118442	54.88	1145.12
LOC441208	441208	NUDT18	79873	55.01	1144.99
SPPL2C	162540	ODF3L2	284451	55.05	1144.95
CHRNB2	1141	NRXN2	9379	55.12	1144.88
DLGAP2	9228	GRM4	2914	55.15	1144.85
MXRA5	25878	ITGBL1	9358	55.27	1144.73
CDKN1C	1028	PEX11G	92960	55.32	1144.68
CILP2	148113	CDK5R2	8941	55.48	1144.52
ISLR	3671	LAMA2	3908	55.48	1144.52
RGS5	8490	LMOD1	25802	55.5	1144.5
NKX6-3	157848	NCRNA00083	400797	55.52	1144.48
METTL7B	196410	ACSM2B	348158	55.59	1144.41
CRYAA	1409	GPR139	124274	55.71	1144.29
APOC3	345	ANKS4B	257629	55.72	1144.28
SLC22A2	6582	SLC22A12	116085	55.75	1144.25
DCN	1634	FBLN2	2199	55.81	1144.19
THY1	7070	COL5A1	1289	55.82	1144.18
LOC389493	389493	KREMEN2	79412	55.86	1144.14
DLC1	10395	COL6A3	1293	55.9	1144.1
RARRES2	5919	MYL9	10398	55.96	1144.04
IL17RB	55540	VIL1	7429	55.96	1144.04
C12orf61	283416	HES5	388585	55.99	1144.01
MSRB3	253827	EFEMP2	30008	56	1144
PON1	5444	ACSM2B	348158	56	1144
CHRNB2	1141	CDK5R2	8941	56.04	1143.96
PIPOX	51268	SERPIND1	3053	56.12	1143.88
VWA1	64856	IER5L	389792	56.12	1143.88
KCNK7	10089	TSGA10IP	254187	56.2	1143.8
BARX1	56033	IER5L	389792	56.23	1143.77
METRN	79006	HES5	388585	56.41	1143.59
CDX1	1044	RBMXL2	27288	56.41	1143.59
SP5	389058	AIFM3	150209	56.44	1143.56
FERMT2	10979	MYLK	4638	56.5	1143.5
KRTAP12-4	386684	GFRA4	64096	56.58	1143.42
PPY2	23614	C20orf185	359710	56.66	1143.34
C20orf185	359710	KRTAP12-4	386684	56.67	1143.33
SPATC1	375686	C20orf185	359710	56.74	1143.26
TMEM105	284186	IQSEC3	440073	56.75	1143.25
ESPNL	339768	MIR339	442907	56.75	1143.25
CRYAA	1409	MIR339	442907	56.82	1143.18
NANOS3	342977	MIR339	442907	56.87	1143.13
DKK3	27122	ITGBL1	9358	56.87	1143.13
SULT2A1	6822	GAS2	2620	57	1143
TTR	7276	GAS2	2620	57.01	1142.99
TPSG1	25823	GFRA4	64096	57.06	1142.94
SPRNP1	399833	KCNK7	10089	57.06	1142.94
TTLL10	254173	ODF3L2	284451	57.13	1142.87
SLC38A3	10991	SERPIND1	3053	57.17	1142.83
VCAN	1462	MXRA5	25878	57.17	1142.83
BICC1	80114	ITGBL1	9358	57.24	1142.76
CILP2	148113	MIR339	442907	57.25	1142.75
CYP26C1	340665	CDK5R2	8941	57.34	1142.66
SCGN	10590	A1CF	29974	57.36	1142.64
PRSS45	377047	KRTAP5-1	387264	57.39	1142.61
MIA2	117153	ACSM2B	348158	57.43	1142.57
ISLR	3671	COL5A1	1289	57.55	1142.45
MSRB3	253827	ITGBL1	9358	57.71	1142.29
HLF	3131	GAS2	2620	57.78	1142.22
LIM2	3982	ODF3L2	284451	57.78	1142.22
MIR210	406992	CDK5R2	8941	57.83	1142.17
RBMXL2	27288	GFRA4	64096	57.83	1142.17
CNTN4	152330	ASPN	54829	57.86	1142.14
KLF14	136259	CDK5R2	8941	57.91	1142.09
RBP5	83758	CYP4F2	8529	57.91	1142.09
VPS37D	155382	CYP2W1	54905	57.92	1142.08
MPPED1	758	COL9A3	1299	57.92	1142.08
TSHZ3	57616	COL3A1	1281	58.1	1141.9
EPHX2	2053	SLC38A3	10991	58.14	1141.86
MSRB3	253827	TIMP3	7078	58.17	1141.83
KLHL17	339451	GPR62	118442	58.21	1141.79
LGR5	8549	FRAS1	80144	58.22	1141.78
GLT8D2	83468	DLC1	10395	58.24	1141.76
CSH1	1442	PRSS45	377047	58.24	1141.76
GJD4	219770	NCRNA00083	400797	58.31	1141.69
TMEM105	284186	MYADML2	255275	58.34	1141.66
MTHFD2L	441024	MADCAM1	8174	58.47	1141.53
NUDT18	79873	GPR62	118442	58.48	1141.52
KLKB1	3818	RGN	9104	58.5	1141.5
DEGS2	123099	GPR139	124274	58.51	1141.49
MMP2	4313	MYLK	4638	58.57	1141.43
SERPINF1	5176	GPC3	2719	58.57	1141.43
LOC100129484	100129484	MIR339	442907	58.57	1141.43
SLC17A3	10786	A1CF	29974	58.58	1141.42
CDKN1C	1028	FLJ11235	54508	58.58	1141.42
RTN4RL2	349667	HES4	57801	58.69	1141.31
DLX5	1749	FBN2	2201	58.79	1141.21
SCNN1D	6339	MADCAM1	8174	58.82	1141.18
MYL9	10398	COL6A3	1293	58.86	1141.14
ABCG5	64240	SERPINA6	866	58.86	1141.14
RBMXL2	27288	PEX11G	92960	58.89	1141.11
COL9A3	1299	SRRM3	222183	59.03	1140.97
IGFBP5	3488	EFEMP2	30008	59.04	1140.96
CLDND2	125875	NCRNA00083	400797	59.06	1140.94
UNC5A	90249	SRRM3	222183	59.1	1140.9
FERMT2	10979	TIMP3	7078	59.14	1140.86
BARX1	56033	KREMEN2	79412	59.16	1140.84
NRTN	4902	GPR62	118442	59.4	1140.6
C2orf85	285093	MADCAM1	8174	59.4	1140.6
TSGA10IP	254187	ODF3L2	284451	59.4	1140.6
CLDND2	125875	MYADML2	255275	59.4	1140.6
GP1BB	2812	TOPAZ1	375337	59.41	1140.59
KLF14	136259	PRR22	163154	59.42	1140.58
HPR	3250	CPN1	1369	59.45	1140.55
FAM170B	170370	SCNN1D	6339	59.6	1140.4
CLDN19	149461	CYP2W1	54905	59.61	1140.39
C12orf61	283416	RBMXL2	27288	59.62	1140.38
PPY2	23614	IQSEC3	440073	59.7	1140.3
FBLN5	10516	COL3A1	1281	59.72	1140.28
KCNK7	10089	NCRNA00083	400797	59.72	1140.28
CTAG2	30848	TSGA10IP	254187	59.74	1140.26
CLDN19	149461	MADCAM1	8174	59.77	1140.23
FBLN2	2199	MXRA5	25878	59.87	1140.13
IER5L	389792	SCT	6343	59.97	1140.03
DCN	1634	IGFBP5	3488	60	1140
ANTXR1	84168	MRC2	9902	60.15	1139.85
DCN	1634	PRELP	5549	60.25	1139.75
CRYAA	1409	GFRA4	64096	60.33	1139.67
C20orf185	359710	KREMEN2	79412	60.4	1139.6
EFEMP1	2202	ISLR	3671	60.4	1139.6
SLC22A3	6581	FGA	2243	60.5	1139.5
TMEM198	130612	SRRM3	222183	60.52	1139.48
SULT2A1	6822	PIPOX	51268	60.62	1139.38
C8orf84	157869	ASPN	54829	60.74	1139.26
FHL1	2273	RCAN2	10231	60.75	1139.25
BICC1	80114	LAMA2	3908	60.79	1139.21
FGL1	2267	APOC3	345	60.82	1139.18
LYZL4	131375	GPR139	124274	60.89	1139.11
TTBK1	84630	CYP2W1	54905	60.99	1139.01
ADAMTS7	11173	IQSEC3	440073	61.09	1138.91
IER5L	389792	HES5	388585	61.11	1138.89
CHST13	166012	METRN	79006	61.13	1138.87
ACTL9	284382	ODF3L2	284451	61.16	1138.84
SLC38A4	55089	KLKB1	3818	61.16	1138.84
DLC1	10395	FBLN5	10516	61.19	1138.81
RHOJ	57381	LAMA2	3908	61.19	1138.81
ARIH2	10425	IER5L	389792	61.19	1138.81
TRPM5	29850	DUPD1	338599	61.25	1138.75
C20orf185	359710	CYP2W1	54905	61.32	1138.68
TSHZ3	57616	THY1	7070	61.4	1138.6
METRN	79006	HES4	57801	61.48	1138.52
MPPED1	758	SRRM3	222183	61.51	1138.49
LOC389493	389493	ODF3L2	284451	61.58	1138.42
ANTXR1	84168	ISLR	3671	61.61	1138.39
SRRM3	222183	KREMEN2	79412	61.71	1138.29
RTN4RL2	349667	TMEM121	80757	61.77	1138.23
BICC1	80114	ISLR	3671	61.79	1138.21
RBMXL2	27288	CDK5R2	8941	61.82	1138.18
LIM2	3982	DNM1P35	100128285	61.82	1138.18
KRTAP5-1	387264	GPR139	124274	61.85	1138.15
C20orf151	140893	TMEM105	284186	61.85	1138.15
METRN	79006	IER5L	389792	61.93	1138.07
RCAN2	10231	MYL9	10398	62.05	1137.95
KNG1	3827	TTR	7276	62.08	1137.92
SLC17A3	10786	SLC22A12	116085	62.08	1137.92
PDE1A	5136	GLT8D2	83468	62.09	1137.91
RBPMS	11030	DLC1	10395	62.1	1137.9
LYZL4	131375	SPATC1	375686	62.1	1137.9
DKK3	27122	COL6A3	1293	62.14	1137.86
FILIP1L	11259	EFEMP2	30008	62.21	1137.79
HES4	57801	KREMEN2	79412	62.23	1137.77
SSPN	8082	C1S	716	62.23	1137.77
HPR	3250	ACSM2B	348158	62.24	1137.76
GATM	2628	KLKB1	3818	62.33	1137.67
LIM2	3982	TOPAZ1	375337	62.35	1137.65
KCNQ1DN	55539	MADCAM1	8174	62.48	1137.52
EFNA2	1943	RTN4RL2	349667	62.49	1137.51
KCNG4	93107	ODF3L2	284451	62.55	1137.45
KLF14	136259	IER5L	389792	62.55	1137.45
C2orf85	285093	MIR210	406992	62.64	1137.36
FUT5	2527	ADAMTS13	11093	62.69	1137.31
SCGN	10590	GAS2	2620	62.74	1137.26
SERPINA6	866	PIPOX	51268	62.8	1137.2
HAPLN2	60484	SRRM3	222183	62.86	1137.14
HLF	3131	AMBP	259	63.17	1136.83
COL9A3	1299	CYP2W1	54905	63.19	1136.81
LPPR1	54886	SLC38A3	10991	63.21	1136.79
MIA2	117153	KNG1	3827	63.21	1136.79
RTN4RL2	349667	KREMEN2	79412	63.25	1136.75
PRSS42	339906	CTAG2	30848	63.26	1136.74
C12orf61	283416	GFRA4	64096	63.29	1136.71
DCN	1634	NDN	4692	63.29	1136.71
EPHX2	2053	A1CF	29974	63.4	1136.6
SMTNL2	342527	KREMEN2	79412	63.45	1136.55
ACSM2B	348158	RGN	9104	63.5	1136.5
AIFM3	150209	KREMEN2	79412	63.64	1136.36
ADAMTS13	11093	GPR62	118442	63.69	1136.31
PCSK4	54760	MIR210	406992	63.76	1136.24
PRSS42	339906	C20orf151	140893	63.77	1136.23
CLRN3	119467	CYP4F2	8529	63.8	1136.2
KRTAP5-1	387264	MYADML2	255275	63.88	1136.12
CILP2	148113	SCT	6343	63.93	1136.07
TIMP2	7077	BICC1	80114	63.99	1136.01
FUT5	2527	ODF3L2	284451	64	1136
PON1	5444	HAO2	51179	64.06	1135.94
MIA2	117153	ANKS4B	257629	64.09	1135.91
TTLL10	254173	MADCAM1	8174	64.16	1135.84
ADM2	79924	CRYAA	1409	64.17	1135.83
LPPR1	54886	RGN	9104	64.23	1135.77
TBX10	347853	MADCAM1	8174	64.25	1135.75
VSTM4	196740	LAMA2	3908	64.31	1135.69
ADM2	79924	CYP2W1	54905	64.34	1135.66
MYL9	10398	MMP2	4313	64.35	1135.65
SMTNL2	342527	GPR62	118442	64.42	1135.58
RNF128	79589	VIL1	7429	64.42	1135.58
MEG3	55384	COL5A1	1289	64.48	1135.52
POM121L12	285877	C20orf185	359710	64.65	1135.35
CSH1	1442	SPPL2C	162540	64.65	1135.35
VCAN	1462	JAM3	83700	64.68	1135.32
GJD4	219770	KREMEN2	79412	64.74	1135.26
IGFBP5	3488	ISLR	3671	64.81	1135.19
ANKS4B	257629	LPPR1	54886	64.92	1135.08
COL9A3	1299	TMEM105	284186	64.93	1135.07
C20orf151	140893	DNM1P35	100128285	64.95	1135.05
KLF14	136259	SMTNL2	342527	64.95	1135.05
NDN	4692	DKK3	27122	65.12	1134.88
TIMP3	7078	FBLN5	10516	65.13	1134.87
KRTAP12-4	386684	NCRNA00083	400797	65.19	1134.81
FUT5	2527	GFRA4	64096	65.35	1134.65
MIR339	442907	HES5	388585	65.45	1134.55
MTHFD2L	441024	MIR339	442907	65.45	1134.55
FAM170B	170370	SPATC1	375686	65.5	1134.5
TRPM5	29850	MYADML2	255275	65.5	1134.5
CLDND2	125875	LIM2	3982	65.57	1134.43
ABCG5	64240	MST1P9	11223	65.57	1134.43
PACSIN1	29993	CDK5R2	8941	65.68	1134.32
RARRES2	5919	MYLK	4638	65.73	1134.27
CLDN19	149461	SPATC1	375686	65.73	1134.27
LOC100131763	100131763	GFRA4	64096	65.79	1134.21
RXFP3	51289	VPS37D	155382	65.8	1134.2
HES4	57801	IER5L	389792	65.95	1134.05
ANTXR1	84168	COL5A1	1289	65.97	1134.03
GLT8D2	83468	SNORD113-4	767564	65.98	1134.02
CDX1	1044	HES4	57801	66.07	1133.93
FERMT2	10979	FILIP1L	11259	66.09	1133.91
NUDT18	79873	PEX11G	92960	66.21	1133.79
DKK3	27122	FSTL1	11167	66.23	1133.77
MYH11	4629	MSRB3	253827	66.23	1133.77
ZNF524	147807	MADCAM1	8174	66.3	1133.7
SPPL2C	162540	IQSEC3	440073	66.33	1133.67
KCNG4	93107	C20orf151	140893	66.34	1133.66
GPR139	124274	KREMEN2	79412	66.41	1133.59
CDX1	1044	VPS37D	155382	66.41	1133.59
RADIL	55698	CDK5R2	8941	66.41	1133.59
EFNA2	1943	CHST13	166012	66.45	1133.55
NKX6-1	4825	SCT	6343	66.48	1133.52
SPATC1	375686	KREMEN2	79412	66.48	1133.52
KNG1	3827	FGA	2243	66.48	1133.52
PTGFR	5737	LAMA2	3908	66.57	1133.43
SCNN1D	6339	KREMEN2	79412	66.63	1133.37
DNM1P35	100128285	ODF3L2	284451	66.69	1133.31
LOC100131763	100131763	NANOS3	342977	66.74	1133.26
ARIH2	10425	ZNF517	340385	66.74	1133.26
CHST13	166012	PRR7	80758	66.75	1133.25
EXOSC6	118460	GFRA4	64096	66.81	1133.19
ENPP2	5168	FBLN5	10516	66.96	1133.04
ZNF517	340385	DLEU7	220107	67	1133
HLF	3131	TTR	7276	67.04	1132.96
CFH	3075	FBLN5	10516	67.08	1132.92
PEX11G	92960	TMEM121	80757	67.26	1132.74
LMOD1	25802	FBLN5	10516	67.32	1132.68
MIR210	406992	MADCAM1	8174	67.4	1132.6
FGA	2243	A1CF	29974	67.51	1132.49
CRB3	92359	SRRM3	222183	67.53	1132.47
KBTBD11	9920	HES5	388585	67.64	1132.36
RBMXL2	27288	ODF3L2	284451	67.69	1132.31
NKX6-3	157848	ODF3L2	284451	67.75	1132.25
GJD4	219770	TOPAZ1	375337	67.81	1132.19
NUDT18	79873	KREMEN2	79412	67.87	1132.13
FGF2	2247	GLT8D2	83468	67.95	1132.05
NANOS3	342977	KREMEN2	79412	67.97	1132.03
F9	2158	AGXT2	64902	67.97	1132.03
UTS2R	2837	HES5	388585	67.99	1132.01
C1QTNF7	114905	ASPN	54829	68.01	1131.99
C20orf151	140893	KRTAP5-1	387264	68.12	1131.88
ABCG5	64240	ANKS4B	257629	68.19	1131.81
NRXN2	9379	GFRA4	64096	68.23	1131.77
TSHZ3	57616	TIMP2	7077	68.26	1131.74
BARX1	56033	HES5	388585	68.29	1131.71
ARIH2	10425	HES4	57801	68.35	1131.65
NKX6-3	157848	TMEM105	284186	68.37	1131.63
FSTL1	11167	TIMP3	7078	68.37	1131.63
UTS2R	2837	KREMEN2	79412	68.38	1131.62
DUPD1	338599	KRTAP5-1	387264	68.41	1131.59
SPPL2C	162540	MYADML2	255275	68.42	1131.58
NDN	4692	MYL9	10398	68.45	1131.55
IGF2	3481	SERPINF1	5176	68.46	1131.54
ZNF517	340385	FLJ11235	54508	68.48	1131.52
VAX2	25806	C20orf151	140893	68.48	1131.52
C20orf151	140893	MYADML2	255275	68.5	1131.5
FLJ43860	389690	IQSEC3	440073	68.54	1131.46
NRTN	4902	CDK5R2	8941	68.59	1131.41
MST1P9	11223	TTR	7276	68.64	1131.36
CRB3	92359	VAX2	25806	68.75	1131.25
RBPMS	11030	NEXN	91624	68.76	1131.24
CDX1	1044	NKX6-3	157848	68.82	1131.18
CDKN1C	1028	NRTN	4902	68.82	1131.18
MSRB3	253827	LAMA2	3908	68.85	1131.15
LOC100131763	100131763	CYP2W1	54905	68.88	1131.12
SPRNP1	399833	CRAMP1L	57585	68.88	1131.12
DCN	1634	MSRB3	253827	68.9	1131.1
MIR210	406992	TMEM121	80757	68.93	1131.07
OTC	5009	CYP4F2	8529	68.93	1131.07
GP1BB	2812	CRAMP1L	57585	68.93	1131.07
PON1	5444	SULT2A1	6822	68.93	1131.07
ACSM2B	348158	SERPIND1	3053	68.94	1131.06
PEX11G	92960	KREMEN2	79412	68.98	1131.02
MYL9	10398	FBLN5	10516	68.98	1131.02
PTGFR	5737	MMP2	4313	68.99	1131.01
CHSY3	337876	COL5A1	1289	69.02	1130.98
TMEM121	80757	CDK5R2	8941	69.09	1130.91
PCSK4	54760	MIR339	442907	69.17	1130.83
KCNG4	93107	CYP2W1	54905	69.26	1130.74
ADM2	79924	NKX6-1	4825	69.28	1130.72
GPC3	2719	SERPIND1	3053	69.28	1130.72
METRN	79006	PEX11G	92960	69.28	1130.72
DKK3	27122	SSPN	8082	69.42	1130.58
ANTXR1	84168	EFEMP2	30008	69.42	1130.58
MIA2	117153	APOC3	345	69.46	1130.54
KLHL17	339451	KREMEN2	79412	69.54	1130.46
ITGA5	3678	COL6A3	1293	69.57	1130.43
LOC441208	441208	SNAI3	333929	69.58	1130.42
CDX1	1044	COL9A3	1299	69.61	1130.39
PPP1R9A	55607	FRAS1	80144	69.65	1130.35
ZNF517	340385	ZNF524	147807	69.82	1130.18
ATP10A	57194	COL16A1	1307	69.84	1130.16
SLC22A2	6582	AGXT2	64902	69.85	1130.15
HNF1A	6927	CHST13	166012	69.88	1130.12
FILIP1L	11259	TIMP3	7078	69.89	1130.11
PRSS42	339906	TMEM105	284186	69.89	1130.11
C20orf151	140893	COL20A1	57642	69.97	1130.03
SRMS	6725	TOPAZ1	375337	69.97	1130.03
MEG3	55384	PLAGL1	5325	69.97	1130.03
COL20A1	57642	TMEM105	284186	70.1	1129.9
TPSG1	25823	MIR339	442907	70.1	1129.9
KIAA1462	57608	MYL9	10398	70.1	1129.9
FLJ43860	389690	GFRA4	64096	70.11	1129.89
PGCP	10404	SERPINF1	5176	70.14	1129.86
IER5L	389792	CDK5R2	8941	70.15	1129.85
RNF128	79589	TTR	7276	70.16	1129.84
TPSG1	25823	DNM1P35	100128285	70.2	1129.8
EPHX2	2053	HLF	3131	70.2	1129.8
LMOD1	25802	LAMA2	3908	70.21	1129.79
AIFM3	150209	GFRA4	64096	70.26	1129.74
LOC100131763	100131763	KRTAP12-4	386684	70.29	1129.71
KLF14	136259	AVP	551	70.29	1129.71
RASL10B	91608	GFRA4	64096	70.36	1129.64
SLC17A3	10786	ACOT11	26027	70.36	1129.64
PLAGL1	5325	FBLN5	10516	70.38	1129.62
GPC3	2719	AMBP	259	70.42	1129.58
LPPR1	54886	TTR	7276	70.42	1129.58
ATP10A	57194	ASPN	54829	70.47	1129.53
CLDND2	125875	NKX6-3	157848	70.48	1129.52
SPRNP1	399833	IQSEC3	440073	70.55	1129.45
MYL9	10398	DLC1	10395	70.58	1129.42
CFH	3075	FSTL1	11167	70.6	1129.4
APOC3	345	HAO2	51179	70.65	1129.35
MIA2	117153	AMBP	259	70.65	1129.35
RGS5	8490	FHL1	2273	70.65	1129.35
SLC38A4	55089	A1CF	29974	70.65	1129.35
PPY2	23614	MADCAM1	8174	70.68	1129.32
KRTAP12-4	386684	ADAMTS13	11093	70.7	1129.3
TSGA10IP	254187	DNM1P35	100128285	70.72	1129.28
NCRNA00083	400797	GFRA4	64096	70.74	1129.26
USP29	57663	KRTAP12-4	386684	70.81	1129.19
FOXL2	668	HES5	388585	70.87	1129.13
HPR	3250	FGL1	2267	70.94	1129.06
TP73	7161	PRR7	80758	70.99	1129.01
KLF14	136259	KREMEN2	79412	71.01	1128.99
C12orf61	283416	HES4	57801	71.13	1128.87
METRN	79006	ZNF517	340385	71.22	1128.78
NPFFR1	64106	MIR339	442907	71.29	1128.71
LOC389493	389493	CYP2W1	54905	71.36	1128.64
RTN4RL2	349667	METRN	79006	71.39	1128.61
NKX6-1	4825	MADCAM1	8174	71.41	1128.59
MT3	4504	DRD5	1816	71.41	1128.59
MRC2	9902	GLT8D2	83468	71.41	1128.59
TTLL10	254173	KREMEN2	79412	71.44	1128.56
CFH	3075	LAMA2	3908	71.46	1128.54
DRD5	1816	NANOS3	342977	71.48	1128.52
SPATC1	375686	MADCAM1	8174	71.52	1128.48
KIAA1462	57608	TIMP2	7077	71.52	1128.48
FUT5	2527	NANOS3	342977	71.53	1128.47
C8G	733	MIR339	442907	71.53	1128.47
FBLN2	2199	MMP2	4313	71.55	1128.45
GJD4	219770	DNM1P35	100128285	71.58	1128.42
MYH11	4629	ASPN	54829	71.58	1128.42
KLF14	136259	CILP2	148113	71.58	1128.42
SERPIND1	3053	RGN	9104	71.59	1128.41
THY1	7070	ISLR	3671	71.66	1128.34
MST1P9	11223	SULT2A1	6822	71.67	1128.33
KRTAP12-4	386684	MADCAM1	8174	71.74	1128.26
COL9A2	1298	CYP2W1	54905	71.78	1128.22
RCN3	57333	ITGA5	3678	71.83	1128.17
TSHZ3	57616	RCN3	57333	71.83	1128.17
CYP26C1	340665	HES5	388585	71.9	1128.1
SULT2A1	6822	SLC38A3	10991	71.9	1128.1
CHSY3	337876	LAMA2	3908	71.94	1128.06
C15orf55	256646	MYADML2	255275	71.94	1128.06
NDN	4692	ISLR	3671	71.97	1128.03
DLEU7	220107	GPR62	118442	72.02	1127.98
PON3	5446	AMBP	259	72.04	1127.96
ASPN	54829	FBLN5	10516	72.1	1127.9
METTL7B	196410	PIPOX	51268	72.12	1127.88
RBMXL2	27288	HES5	388585	72.17	1127.83
LOC441208	441208	ZNF517	340385	72.25	1127.75
CFH	3075	COL3A1	1281	72.37	1127.63
LOC100128374	100128374	DNM1P35	100128285	72.38	1127.62
RBMXL2	27288	TMEM121	80757	72.42	1127.58
ZNF524	147807	MIR210	406992	72.42	1127.58
C20orf151	140893	ODF3L2	284451	72.44	1127.56
LOC441208	441208	C12orf61	283416	72.44	1127.56
C12orf61	283416	GPR62	118442	72.45	1127.55
LOC100130857	100130857	DRD5	1816	72.46	1127.54
NEXN	91624	TIMP3	7078	72.66	1127.34
FGL1	2267	SLC38A3	10991	72.66	1127.34
DUPD1	338599	ODF3L2	284451	72.8	1127.2
SLC17A3	10786	PIPOX	51268	72.94	1127.06
C1QTNF7	114905	VSTM4	196740	72.97	1127.03
DRD5	1816	MIR339	442907	72.99	1127.01
SNORD113-4	767564	COL6A3	1293	73.08	1126.92
COL16A1	1307	C20orf151	140893	73.23	1126.77
VIL1	7429	PIPOX	51268	73.24	1126.76
ESPNL	339768	ODF3L2	284451	73.25	1126.75
COL9A3	1299	VPS37D	155382	73.27	1126.73
MIA2	117153	FGL1	2267	73.27	1126.73
SP5	389058	KREMEN2	79412	73.29	1126.71
PDE1A	5136	DLC1	10395	73.3	1126.7
CFH	3075	BICC1	80114	73.42	1126.58
SERPIND1	3053	GAS2	2620	73.44	1126.56
MEG3	55384	COL3A1	1281	73.46	1126.54
SCNN1D	6339	MIR210	406992	73.48	1126.52
LPPR1	54886	AMBP	259	73.5	1126.5
MYADML2	255275	MADCAM1	8174	73.52	1126.48
FGA	2243	SERPINA6	866	73.52	1126.48
GRM1	2911	CDK5R2	8941	73.55	1126.45
NANOS3	342977	KRTAP12-4	386684	73.57	1126.43
COL9A2	1298	NKX6-3	157848	73.75	1126.25
VAX2	25806	IQSEC3	440073	73.76	1126.24
DUPD1	338599	KCNK7	10089	73.76	1126.24
SLC22A3	6581	SERPIND1	3053	73.76	1126.24
TRPM5	29850	C20orf151	140893	73.76	1126.24
PPP1R9A	55607	PEG10	23089	73.83	1126.17
SSPN	8082	MYLK	4638	73.85	1126.15
DLEU7	220107	HES5	388585	73.86	1126.14
C1QTNF7	114905	CNTN4	152330	73.86	1126.14
RTN4RL2	349667	NRTN	4902	73.89	1126.11
NKX6-3	157848	KRTAP5-1	387264	74.03	1125.97
TSHZ3	57616	JAM3	83700	74.03	1125.97
MT3	4504	KRTAP12-4	386684	74.07	1125.93
VAX2	25806	TMEM105	284186	74.07	1125.93
FLJ11235	54508	GFRA4	64096	74.08	1125.92
ABCG5	64240	F9	2158	74.12	1125.88
ADM2	79924	SCT	6343	74.16	1125.84
LPPR1	54886	SERPINA6	866	74.16	1125.84
TRPM5	29850	NCRNA00083	400797	74.18	1125.82
KIAA1462	57608	LAMA2	3908	74.19	1125.81
RHOJ	57381	MYLK	4638	74.22	1125.78
MYL9	10398	COL5A1	1289	74.23	1125.77
LOC100131763	100131763	ADAMTS13	11093	74.24	1125.76
DCN	1634	FILIP1L	11259	74.27	1125.73
MADCAM1	8174	CYP2W1	54905	74.3	1125.7
CRB3	92359	COL9A3	1299	74.3	1125.7
VSTM4	196740	EFEMP2	30008	74.36	1125.64
KCNQ1DN	55539	GPR139	124274	74.36	1125.64
RXFP3	51289	ODF3L2	284451	74.4	1125.6
TNFRSF4	7293	KREMEN2	79412	74.4	1125.6
HES4	57801	HES5	388585	74.46	1125.54
DCN	1634	KIAA1462	57608	74.6	1125.4
LOC100128374	100128374	NANOS3	342977	74.62	1125.38
MSRB3	253827	SSPN	8082	74.62	1125.38
KIAA1462	57608	COL6A3	1293	74.62	1125.38
CLRN3	119467	HAO2	51179	74.7	1125.3
SPRNP1	399833	KRTAP5-3	387266	74.87	1125.13
TIMP3	7078	ITGBL1	9358	74.9	1125.1
GPC3	2719	TTR	7276	74.9	1125.1
COL9A3	1299	RASL10B	91608	74.9	1125.1
ESPNL	339768	MIR210	406992	74.94	1125.06
C12orf61	283416	KREMEN2	79412	74.94	1125.06
NKX6-3	157848	MYADML2	255275	74.99	1125.01
DCN	1634	RCAN2	10231	75	1125
MPPED1	758	VAX2	25806	75.01	1124.99
LOC100130857	100130857	NANOS3	342977	75.05	1124.95
SGCE	8910	FBLN5	10516	75.07	1124.93
DLK1	8788	SP5	389058	75.1	1124.9
NKX6-1	4825	HES5	388585	75.12	1124.88
RARRES2	5919	RGN	9104	75.2	1124.8
CSH1	1442	GPR139	124274	75.24	1124.76
PPY2	23614	C2orf85	285093	75.29	1124.71
ACTL9	284382	ZNF517	340385	75.3	1124.7
KIAA1462	57608	RHOJ	57381	75.32	1124.68
SLC22A3	6581	CXCL14	9547	75.48	1124.52
MMP2	4313	DLC1	10395	75.5	1124.5
PON3	5446	SERPIND1	3053	75.52	1124.48
IGF2	3481	ASPN	54829	75.58	1124.42
JAM3	83700	RHOJ	57381	75.63	1124.37
TMEM198	130612	CDK5R2	8941	75.63	1124.37
LOC100128374	100128374	GPR139	124274	75.66	1124.34
SP5	389058	TMEM121	80757	75.66	1124.34
PRSS42	339906	KRTAP5-1	387264	75.66	1124.34
THY1	7070	MRC2	9902	75.68	1124.32
ABCG5	64240	PIPOX	51268	75.68	1124.32
SLC17A3	10786	ANKS4B	257629	75.78	1124.22
SPATC1	375686	IQSEC3	440073	75.8	1124.2
SPATC1	375686	NANOS3	342977	75.84	1124.16
MT3	4504	GFRA4	64096	75.84	1124.16
KIAA1462	57608	ISLR	3671	75.92	1124.08
TMEM198	130612	ODF3L2	284451	75.95	1124.05
DDC	1644	ACSM2B	348158	76	1124
MIR210	406992	DLEU7	220107	76.03	1123.97
TBX10	347853	MYADML2	255275	76.03	1123.97
ABCG5	64240	HPR	3250	76.03	1123.97
LOC100130857	100130857	GPR139	124274	76.12	1123.88
LOC100131763	100131763	TOPAZ1	375337	76.16	1123.84
NUDT18	79873	CYP26C1	340665	76.16	1123.84
IGFBP5	3488	RCAN2	10231	76.16	1123.84
CLDN19	149461	MIR210	406992	76.21	1123.79
SPATC1	375686	KRTAP12-4	386684	76.34	1123.66
IGFBP5	3488	TIMP3	7078	76.36	1123.64
RBP5	83758	APOC3	345	76.37	1123.63
CFH	3075	PGCP	10404	76.47	1123.53
IGFBP5	3488	DKK3	27122	76.49	1123.51
KLF14	136259	HES5	388585	76.49	1123.51
SCNN1D	6339	IQSEC3	440073	76.54	1123.46
COL9A2	1298	TOPAZ1	375337	76.54	1123.46
IGF2	3481	GPC3	2719	76.68	1123.32
CRB3	92359	HES4	57801	76.73	1123.27
COL9A3	1299	ACTL9	284382	76.75	1123.25
KLHL17	339451	CDK5R2	8941	76.81	1123.19
PGCP	10404	LAMA2	3908	76.84	1123.16
FERMT2	10979	RHOJ	57381	76.99	1123.01
RBP5	83758	ACOT11	26027	76.99	1123.01
FLJ11235	54508	CDK5R2	8941	77	1123
VAX2	25806	GFRA4	64096	77.03	1122.97
ADM2	79924	GPR62	118442	77.14	1122.86
GJD4	219770	CYP2W1	54905	77.14	1122.86
SMTNL2	342527	CDK5R2	8941	77.36	1122.64
LMOD1	25802	DLC1	10395	77.37	1122.63
SSPN	8082	MMP2	4313	77.42	1122.58
CRB3	92359	CDX1	1044	77.46	1122.54
TIMP2	7077	MRC2	9902	77.49	1122.51
KLHL17	339451	PEX11G	92960	77.59	1122.41
DDC	1644	CLRN3	119467	77.65	1122.35
FGL1	2267	RGN	9104	77.79	1122.21
SLC26A1	10861	GFRA4	64096	77.91	1122.09
TIMP2	7077	MYLK	4638	77.92	1122.08
LOC100129484	100129484	ADAMTS13	11093	77.97	1122.03
DLC1	10395	COL3A1	1281	78.04	1121.96
PON3	5446	RGN	9104	78.04	1121.96
ACTL9	284382	VPS37D	155382	78.13	1121.87
C8G	733	ADAMTS13	11093	78.13	1121.87
TMEM105	284186	SRRM3	222183	78.2	1121.8
CPN1	1369	ACSM2B	348158	78.23	1121.77
RASL10B	91608	CYP2W1	54905	78.28	1121.72
THY1	7070	MYLK	4638	78.37	1121.63
LOC100131763	100131763	CRAMP1L	57585	78.38	1121.62
SERPINF1	5176	FBLN5	10516	78.42	1121.58
PGCP	10404	MYLK	4638	78.42	1121.58
VSTM4	196740	SSPN	8082	78.51	1121.49
SLC5A10	125206	AGXT2	64902	78.57	1121.43
EXOSC6	118460	BARX1	56033	78.57	1121.43
SCNN1D	6339	CYP2W1	54905	78.58	1121.42
TSHZ3	57616	FSTL1	11167	78.58	1121.42
CPLX1	10815	HES4	57801	78.59	1121.41
GPR25	2848	GPR62	118442	78.7	1121.3
IGFBP5	3488	MMP2	4313	78.79	1121.21
IGF2	3481	COL3A1	1281	78.79	1121.21
UTS2R	2837	MIR339	442907	78.84	1121.16
LMOD1	25802	FBLN2	2199	78.94	1121.06
TOPAZ1	375337	SRRM3	222183	78.97	1121.03
KLKB1	3818	ACSM2B	348158	78.99	1121.01
KRTAP6-3	337968	GPR139	124274	78.99	1121.01
NKX6-1	4825	SMTNL2	342527	79.09	1120.91
TPSG1	25823	CYP2W1	54905	79.12	1120.88
PACSIN1	29993	MT3	4504	79.15	1120.85
SPATC1	375686	CDK5R2	8941	79.2	1120.8
NRTN	4902	RXFP3	51289	79.31	1120.69
EFEMP1	2202	MMP2	4313	79.31	1120.69
DIRAS3	9077	MNX1	3110	79.32	1120.68
MMP2	4313	FBLN5	10516	79.37	1120.63
HOXA13	3209	NKX6-1	4825	79.37	1120.63
OTC	5009	SERPIND1	3053	79.37	1120.63
DKK3	27122	LMOD1	25802	79.49	1120.51
EFNA2	1943	IER5L	389792	79.49	1120.51
DUPD1	338599	KRTAP5-3	387266	79.49	1120.51
COL9A3	1299	AIFM3	150209	79.52	1120.48
RASGRF1	5923	KRTAP5-1	387264	79.57	1120.43
MYLK	4638	DLC1	10395	79.6	1120.4
MIA2	117153	SULT2A1	6822	79.6	1120.4
SLC22A2	6582	ACSM2B	348158	79.6	1120.4
TTBK1	84630	ODF3L2	284451	79.74	1120.26
ANTXR1	84168	DKK3	27122	79.84	1120.16
CHRNB2	1141	GRM4	2914	79.84	1120.16
LOC113230	113230	MNX1	3110	79.87	1120.13
CLDND2	125875	GFRA4	64096	79.89	1120.11
FBN2	2201	GREM1	26585	79.94	1120.06
NCRNA00083	400797	ODF3L2	284451	79.97	1120.03
ESPNL	339768	RXFP3	51289	79.99	1120.01
MPPED1	758	MT3	4504	80.03	1119.97
PEG3	5178	SLC38A3	10991	80.04	1119.96
PRELP	5549	MYL9	10398	80.08	1119.92
PRR7	80758	MIR210	406992	80.12	1119.88
GJD4	219770	C20orf151	140893	80.14	1119.86
TIMP3	7078	COL3A1	1281	80.15	1119.85
ZNF524	147807	SMTNL2	342527	80.24	1119.76
NPFFR1	64106	HES5	388585	80.24	1119.76
MADCAM1	8174	KREMEN2	79412	80.25	1119.75
RARRES2	5919	THY1	7070	80.25	1119.75
IER5L	389792	KREMEN2	79412	80.27	1119.73
ZNF524	147807	NKX6-1	4825	80.3	1119.7
DDC	1644	AGXT2	64902	80.41	1119.59
BARX1	56033	GPR62	118442	80.5	1119.5
RCN3	57333	MXRA5	25878	80.5	1119.5
C7	730	PRELP	5549	80.5	1119.5
NDN	4692	SSPN	8082	80.55	1119.45
HES4	57801	TMEM121	80757	80.62	1119.38
MYH11	4629	ADH1B	125	80.68	1119.32
CECR6	27439	GPR62	118442	80.8	1119.2
ANKS4B	257629	CYP4F2	8529	80.85	1119.15
RBP5	83758	SLC22A11	55867	80.86	1119.14
LIM2	3982	KREMEN2	79412	80.94	1119.06
KLF14	136259	ZNF524	147807	80.94	1119.06
CTAG2	30848	VAX2	25806	80.96	1119.04
KLHL17	339451	CYP26C1	340665	81.17	1118.83
PEG3	5178	SERPIND1	3053	81.17	1118.83
SLC22A3	6581	MIR145	406937	81.18	1118.82
C6orf227	401253	CILP2	148113	81.24	1118.76
POM121L12	285877	MYADML2	255275	81.29	1118.71
MYLK	4638	LAMA2	3908	81.31	1118.69
CRYAA	1409	SPATC1	375686	81.38	1118.62
ESPNL	339768	ADAMTS13	11093	81.42	1118.58
ABCA1	19	TIMP2	7077	81.53	1118.47
ESPNL	339768	NANOS3	342977	81.54	1118.46
LOC441208	441208	FLJ11235	54508	81.55	1118.45
CLDN19	149461	KREMEN2	79412	81.61	1118.39
PDE1A	5136	ITGBL1	9358	81.63	1118.37
FHL1	2273	C8orf84	157869	81.67	1118.33
ACSM2B	348158	TTR	7276	81.69	1118.31
TIGD3	220359	GPR62	118442	81.7	1118.3
F9	2158	CPN1	1369	81.7	1118.3
KBTBD11	9920	METRN	79006	81.74	1118.26
DLGAP2	9228	GFRA4	64096	81.76	1118.24
TIGD3	220359	ODF3L2	284451	81.79	1118.21
MYH11	4629	FBLN5	10516	81.95	1118.05
ZNF517	340385	PRR22	163154	81.98	1118.02
LOC113230	113230	CDK5R2	8941	81.98	1118.02
ASB16	92591	MADCAM1	8174	82.01	1117.99
C8G	733	CYP2W1	54905	82.01	1117.99
LOC100128374	100128374	KREMEN2	79412	82.05	1117.95
FSTL1	11167	ITGBL1	9358	82.13	1117.87
C20orf185	359710	NCRNA00083	400797	82.16	1117.84
COL9A3	1299	NRTN	4902	82.26	1117.74
VWA1	64856	GPR62	118442	82.27	1117.73
KRTAP5-1	387264	DNM1P35	100128285	82.32	1117.68
PPY2	23614	TPSG1	25823	82.37	1117.63
ASB16	92591	ODF3L2	284451	82.46	1117.54
PON2	5445	CASD1	64921	82.49	1117.51
RTN4RL2	349667	LRRC4B	94030	82.7	1117.3
ASB16	92591	ADAMTS13	11093	82.7	1117.3
PEX11G	92960	GFRA4	64096	82.73	1117.27
C6orf227	401253	PRR22	163154	82.73	1117.27
KRTAP12-4	386684	IQSEC3	440073	82.81	1117.19
METRN	79006	KREMEN2	79412	82.83	1117.17
FHL1	2273	LAMA2	3908	82.83	1117.17
NEXN	91624	FBLN5	10516	82.85	1117.15
PPY2	23614	SPATC1	375686	82.87	1117.13
SGCE	8910	C1S	716	82.99	1117.01
PON1	5444	ABCG5	64240	83.01	1116.99
SCGN	10590	RGN	9104	83.04	1116.96
MIA2	117153	AGXT2	64902	83.05	1116.95
MEG3	55384	RCN3	57333	83.05	1116.95
ESPNL	339768	DNM1P35	100128285	83.07	1116.93
CRAMP1L	57585	MYADML2	255275	83.12	1116.88
IL17RB	55540	CLRN3	119467	83.14	1116.86
CPLX1	10815	GFRA4	64096	83.23	1116.77
SGCE	8910	FILIP1L	11259	83.25	1116.75
IGF2	3481	LAMA2	3908	83.38	1116.62
PRR7	80758	IER5L	389792	83.4	1116.6
PEX11G	92960	HES5	388585	83.43	1116.57
C1QTNF7	114905	ADH1B	125	83.46	1116.54
RHOJ	57381	EFEMP2	30008	83.49	1116.51
NUDT18	79873	HES4	57801	83.5	1116.5
TIGD3	220359	TOPAZ1	375337	83.52	1116.48
MYH11	4629	RHOJ	57381	83.64	1116.36
MEG3	55384	COL6A3	1293	83.76	1116.24
JAM3	83700	NEXN	91624	83.79	1116.21
KLF14	136259	ADAMTS7	11173	83.86	1116.14
KLHL17	339451	IER5L	389792	83.87	1116.13
OTC	5009	ACSM2B	348158	83.96	1116.04
NEXN	91624	COL6A3	1293	84	1116
EXOSC6	118460	KLHL17	339451	84	1116
C1QTNF7	114905	MIR145	406937	84.05	1115.95
SP5	389058	MIR339	442907	84.1	1115.9
RBPMS	11030	LMOD1	25802	84.1	1115.9
TMEM121	80757	GFRA4	64096	84.14	1115.86
PRR7	80758	BARX1	56033	84.17	1115.83
GPR25	2848	GFRA4	64096	84.23	1115.77
RASGRF1	5923	IQSEC3	440073	84.25	1115.75
RBMXL2	27288	CYP26C1	340665	84.26	1115.74
IGFBP5	3488	ASPN	54829	84.26	1115.74
LIM2	3982	GPR62	118442	84.29	1115.71
FBN2	2201	FSTL1	11167	84.32	1115.68
EFNA2	1943	NRTN	4902	84.41	1115.59
RCN3	57333	ITGBL1	9358	84.43	1115.57
SLC22A2	6582	SLC5A10	125206	84.47	1115.53
MST1P9	11223	PIPOX	51268	84.5	1115.5
ZNF517	340385	SCT	6343	84.52	1115.48
ABCA1	19	C1S	716	84.56	1115.44
NRXN2	9379	KREMEN2	79412	84.57	1115.43
NUDT18	79873	RBMXL2	27288	84.58	1115.42
KRTAP12-4	386684	MIR339	442907	84.66	1115.34
ABCG5	64240	KNG1	3827	84.68	1115.32
SSPN	8082	FBLN2	2199	84.71	1115.29
MPPED1	758	KRTAP5-1	387264	84.71	1115.29
PON1	5444	HPR	3250	84.71	1115.29
RTN4RL2	349667	VWA1	64856	84.81	1115.19
C2orf85	285093	TMEM105	284186	84.85	1115.15
KCNQ1DN	55539	TPSG1	25823	84.91	1115.09
DCN	1634	SGCE	8910	84.91	1115.09
TFPI2	7980	FGF2	2247	84.97	1115.03
TNFRSF4	7293	CYP2W1	54905	84.98	1115.02
ARIH2	10425	PEX11G	92960	84.98	1115.02
SNORD113-4	767564	DLC1	10395	85.12	1114.88
GABRB3	2562	DCLK1	9201	85.2	1114.8
CDX1	1044	KLHL17	339451	85.21	1114.79
ADH1B	125	GPC3	2719	85.21	1114.79
KLF14	136259	NKX6-1	4825	85.21	1114.79
VAX2	25806	NRTN	4902	85.25	1114.75
MADCAM1	8174	CDK5R2	8941	85.32	1114.68
TTLL10	254173	MIR339	442907	85.32	1114.68
KIAA1462	57608	MYLK	4638	85.32	1114.68
MEG3	55384	MYL9	10398	85.32	1114.68
DRD5	1816	ADAMTS13	11093	85.35	1114.65
CRB3	92359	NRTN	4902	85.35	1114.65
HAPLN2	60484	CDK5R2	8941	85.38	1114.62
BICC1	80114	MXRA5	25878	85.38	1114.62
TSGA10IP	254187	SRRM3	222183	85.4	1114.6
F9	2158	FGL1	2267	85.42	1114.58
FSTL1	11167	COL5A1	1289	85.5	1114.5
KCNK7	10089	KCNG4	93107	85.53	1114.47
OTC	5009	SERPINA6	866	85.53	1114.47
TCEB3C	162699	GPR139	124274	85.53	1114.47
TIMP2	7077	EFEMP2	30008	85.56	1114.44
COL9A2	1298	AIFM3	150209	85.59	1114.41
CHST13	166012	KREMEN2	79412	85.61	1114.39
PEG3	5178	SP5	389058	85.62	1114.38
LOC100130857	100130857	NCRNA00083	400797	85.66	1114.34
VWA1	64856	KLHL17	339451	85.71	1114.29
IGFBP5	3488	CXCL14	9547	85.73	1114.27
GPR25	2848	VPS37D	155382	85.79	1114.21
SLC26A1	10861	AIFM3	150209	85.85	1114.15
CTAG2	30848	TMEM105	284186	85.86	1114.14
RGS5	8490	PRELP	5549	85.93	1114.07
LYZL4	131375	GPR62	118442	85.93	1114.07
PON1	5444	A1CF	29974	85.93	1114.07
IQSEC3	440073	CDK5R2	8941	85.95	1114.05
DDC	1644	PIPOX	51268	85.98	1114.02
KRTAP5-10	387273	CRAMP1L	57585	86	1114
DNM1P35	100128285	GPR62	118442	86.09	1113.91
VIL1	7429	LPPR1	54886	86.14	1113.86
GREM1	26585	GLT8D2	83468	86.17	1113.83
OTC	5009	CPN1	1369	86.17	1113.83
SNAI3	333929	VPS37D	155382	86.22	1113.78
PEG3	5178	RGN	9104	86.23	1113.77
TMEM105	284186	DNM1P35	100128285	86.3	1113.7
CHRNB2	1141	SRRM3	222183	86.3	1113.7
KLF14	136259	C6orf227	401253	86.32	1113.68
CFH	3075	COL6A3	1293	86.36	1113.64
SPPL2C	162540	C2orf85	285093	86.45	1113.55
LOC100129484	100129484	GPR62	118442	86.49	1113.51
TIGD3	220359	DNM1P35	100128285	86.5	1113.5
BICC1	80114	MYLK	4638	86.72	1113.28
PACSIN1	29993	GRM1	2911	86.74	1113.26
DUPD1	338599	MPPED1	758	86.74	1113.26
PEG3	5178	SULT2A1	6822	86.74	1113.26
PEX11G	92960	CYP26C1	340665	86.88	1113.12
TMEM105	284186	NCRNA00083	400797	86.95	1113.05
NNAT	4826	GABRB3	2562	86.95	1113.05
GATM	2628	EPHX2	2053	86.96	1113.04
PRR22	163154	IER5L	389792	86.98	1113.02
CPN1	1369	PIPOX	51268	86.99	1113.01
C20orf185	359710	NANOS3	342977	87.01	1112.99
PEG3	5178	GAS2	2620	87.03	1112.97
SNAI3	333929	HES5	388585	87.09	1112.91
KCNK7	10089	MYADML2	255275	87.12	1112.88
UNC5A	90249	GFRA4	64096	87.16	1112.84
PRR22	163154	MIR339	442907	87.25	1112.75
FLJ11235	54508	DLEU7	220107	87.33	1112.67
NEXN	91624	LAMA2	3908	87.33	1112.67
C1S	716	TIMP3	7078	87.35	1112.65
DDC	1644	IQSEC3	440073	87.44	1112.56
ENPP2	5168	KIAA1462	57608	87.46	1112.54
CILP2	148113	CECR6	27439	87.54	1112.46
RHOJ	57381	TIMP3	7078	87.55	1112.45
DKK3	27122	RCAN2	10231	87.64	1112.36
HES3	390992	SRRM3	222183	87.66	1112.34
MST1P9	11223	A1CF	29974	87.75	1112.25
TSHZ3	57616	ANTXR1	84168	87.83	1112.17
EXOSC6	118460	PRR22	163154	87.87	1112.13
ZNF517	340385	IER5L	389792	87.89	1112.11
IL17RB	55540	A1CF	29974	87.91	1112.09
MADCAM1	8174	ODF3L2	284451	87.98	1112.02
CHST13	166012	HES5	388585	87.98	1112.02
CILP2	148113	IER5L	389792	87.99	1112.01
ZNF524	147807	IER5L	389792	88.02	1111.98
SSPN	8082	DLC1	10395	88.05	1111.95
GPC3	2719	RGN	9104	88.15	1111.85
DUPD1	338599	CRAMP1L	57585	88.16	1111.84
GREM1	26585	SNORD113-4	767564	88.17	1111.83
MIR210	406992	CYP2W1	54905	88.18	1111.82
FBLN2	2199	C1S	716	88.26	1111.74
VPS37D	155382	CDK5R2	8941	88.3	1111.7
NRXN2	9379	CPLX1	10815	88.32	1111.68
ADH1B	125	PDE1A	5136	88.32	1111.68
ZNF517	340385	GPR62	118442	88.33	1111.67
IGFBP5	3488	COL6A3	1293	88.36	1111.64
ANTXR1	84168	MYL9	10398	88.37	1111.63
LOC100131763	100131763	GPR139	124274	88.39	1111.61
ESPNL	339768	CYP26C1	340665	88.49	1111.51
DRD5	1816	NCRNA00083	400797	88.54	1111.46
NPAS1	4861	NKX6-1	4825	88.66	1111.34
MYH11	4629	LAMA2	3908	88.68	1111.32
MPPED1	758	RXFP3	51289	88.69	1111.31
HPR	3250	TTR	7276	88.74	1111.26
MEG3	55384	MMP2	4313	88.74	1111.26
CRB3	92359	VPS37D	155382	88.77	1111.23
VAX2	25806	VPS37D	155382	88.81	1111.19
FGF2	2247	EFEMP1	2202	88.86	1111.14
KLHL17	339451	HES5	388585	88.88	1111.12
C12orf61	283416	CDK5R2	8941	88.96	1111.04
ISLR	3671	DLC1	10395	88.98	1111.02
[truncated: 15,822 more rows]
