# Supplementary material for: A systems-level approach to parental genomic imprinting: the imprinted gene network includes extracellular matrix genes and regulates cell cycle exit and differentiation
Source: HighWire-hosted journal article supplement (doi:10.1101/gr.175919.114), 2015-01-22
Supplement: Table_S14.xlsx [file Table_S14.xlsx]

## Sheet: Table S14
Category	Term	Count	%	PValue	Genes	List Total	Pop Hits	Pop Total	Fold Enrichment	Bonferroni	Benjamini	FDR
GOTERM_CC_FAT	GO:0005576~extracellular region	75	27.3722627737	2.0789033225095E-014	64096, 5168, 1293, 5919, 339906, 11223, 3827, 10404, 131375, 80144, 55540, 2247, 2199, 1289, 3053, 79006, 11093, 2202, 2201, 3250, 2158, 9358, 4313, 1281, 30008, 60484, 117153, 5176, 9547, 5549, 3488, 345, 3818, 2719, 27122, 25878, 7077, 7078, 730, 733, 2267, 11173, 866, 114905, 54829, 6343, 3908, 4902, 7276, 359710, 1462, 3075, 1369, 551, 7043, 10516, 1307, 3671, 148113, 1442, 57642, 10590, 1298…	195	2010	12782	2.4458476847	4.65050220554986E-012	2.32525110277493E-012	2.65010235978025E-011
GOTERM_CC_FAT	GO:0044421~extracellular region part	50	18.2481751825	1.77410653315643E-014	1293, 10404, 3827, 80144, 2247, 2199, 1289, 79006, 11093, 2202, 2201, 3250, 1281, 4313, 60484, 30008, 5176, 9547, 5549, 3488, 345, 3818, 2719, 27122, 7077, 7078, 11173, 2267, 866, 54829, 114905, 3908, 7276, 1462, 3075, 551, 7043, 1369, 1307, 10516, 148113, 57642, 1298, 1299, 26585, 2243, 11167, 22917, 1634, 64856	195	960	12782	3.4139957265	3.97903932025656E-012	3.97903932025656E-012	2.26818563930919E-011
GOTERM_CC_FAT	GO:0005578~proteinaceous extracellular matrix	27	9.8540145985	2.46667564850909E-012	1293, 11173, 54829, 3908, 80144, 2199, 1289, 1462, 11093, 2202, 2201, 10516, 1307, 4313, 1281, 148113, 30008, 60484, 1298, 1299, 5549, 2719, 22917, 7077, 1634, 64856, 7078	195	320	12782	5.5306730769	5.52539347609127E-010	1.38134836902282E-010	3.14905879150729E-009
GOTERM_CC_FAT	GO:0031012~extracellular matrix	28	10.2189781022	2.18371668457597E-012	1293, 11173, 54829, 3908, 80144, 2199, 1289, 1462, 11093, 2202, 2201, 7043, 10516, 1307, 4313, 1281, 148113, 30008, 60484, 1298, 1299, 5549, 2719, 22917, 7077, 1634, 64856, 7078	195	345	12782	5.3198959495	4.89148277438289E-010	1.63049462820197E-010	2.78777001483377E-009
GOTERM_CC_FAT	GO:0044420~extracellular matrix part	12	4.3795620438	1.58575633206169E-006	1307, 1293, 80144, 1281, 30008, 1298, 1299, 7077, 1289, 64856, 7078, 3908	195	117	12782	6.7229454306	0.0003551466	7.10394165833739E-005	0.0020244052
GOTERM_BP_FAT	GO:0042060~wound healing	16	5.8394160584	5.82668177802322E-008	10516, 2158, 2812, 1281, 30008, 3827, 3818, 2243, 2247, 3678, 3053, 1289, 7078, 1816, 11093, 7043	187	191	13528	6.0600834337	8.98433995284442E-005	8.98433995284442E-005	9.71357513979143E-005
KEGG_PATHWAY	hsa04610:Complement and coagulation cascades	9	3.2846715328	2.33508421037543E-006	2158, 716, 3827, 3053, 3818, 3075, 730, 2243, 733	67	69	5085	9.8994159637	0.0001657774	0.0001657774	0.002423598
GOTERM_CC_FAT	GO:0005615~extracellular space	28	10.2189781022	4.82260580247961E-006	1293, 2267, 10404, 3827, 866, 114905, 2247, 7276, 79006, 11093, 3075, 7043, 1369, 551, 3250, 1281, 4313, 57642, 5176, 9547, 3488, 26585, 3818, 345, 2719, 2243, 27122, 11167	195	685	12782	2.6793636534	0.001079683	0.0001800282	0.0061565084
GOTERM_BP_FAT	GO:0050878~regulation of body fluid levels	13	4.7445255474	5.44453618694377E-007	10516, 2812, 2158, 1281, 30008, 3827, 3818, 6343, 2243, 2837, 3053, 11093, 551	187	141	13528	6.6698524671	0.0008391954	0.0004196858	0.0009076471
GOTERM_BP_FAT	GO:0009611~response to wounding	24	8.7591240876	1.03653607003195E-006	2053, 10516, 2158, 2812, 1281, 30008, 7293, 3827, 3818, 349667, 2243, 716, 2247, 3678, 3053, 1289, 7078, 1462, 11093, 1816, 730, 3075, 733, 7043	187	530	13528	3.2758752901	0.0015970628	0.0005326379	0.0017279807
GOTERM_BP_FAT	GO:0022610~biological adhesion	27	9.8540145985	3.6688028358697E-006	2812, 388585, 1293, 10979, 10395, 3908, 3678, 1289, 1462, 11093, 10516, 149461, 1307, 3671, 9358, 1281, 60484, 57642, 55698, 152330, 9379, 8082, 8174, 7070, 84168, 5100, 259	187	701	13528	2.7863632549	0.0056413319	0.001130821	0.006116034
GOTERM_BP_FAT	GO:0007155~cell adhesion	27	9.8540145985	3.57490256767141E-006	2812, 388585, 1293, 10979, 10395, 3908, 3678, 1289, 1462, 11093, 10516, 149461, 1307, 3671, 9358, 1281, 60484, 57642, 55698, 152330, 9379, 8082, 8174, 7070, 84168, 5100, 259	187	700	13528	2.7903437739	0.0054973436	0.0013771782	0.0059595031
GOTERM_BP_FAT	GO:0007596~blood coagulation	10	3.6496350365	1.10362690525656E-005	10516, 2158, 2812, 1281, 30008, 3827, 3053, 11093, 3818, 2243	187	102	13528	7.0923770578	0.0168740322	0.0028323182	0.0183968186
GOTERM_BP_FAT	GO:0050817~coagulation	10	3.6496350365	1.10362690525656E-005	10516, 2158, 2812, 1281, 30008, 3827, 3053, 11093, 3818, 2243	187	102	13528	7.0923770578	0.0168740322	0.0028323182	0.0183968186
GOTERM_BP_FAT	GO:0007599~hemostasis	10	3.6496350365	0.000017561	10516, 2158, 2812, 1281, 30008, 3827, 3053, 11093, 3818, 2243	187	108	13528	6.6983561101	0.0267158872	0.0038609904	0.0292716075
GOTERM_CC_FAT	GO:0005581~collagen	6	2.1897810219	0.0001715092	1307, 1293, 1281, 1298, 1299, 1289	195	35	12782	11.2369230769	0.0376926104	0.0054737282	0.2187329466
GOTERM_MF_FAT	GO:0005178~integrin binding	8	2.9197080292	1.51357720478514E-005	10516, 1307, 1281, 7070, 3678, 7077, 1289, 11093	179	59	12983	9.8346747467	0.0056899796	0.0056899796	0.0209274291
GOTERM_CC_FAT	GO:0030934~anchoring collagen	4	1.4598540146	0.0002703469	1307, 1293, 1298, 1299	195	9	12782	29.1327635328	0.0587682541	0.0075421509	0.3445845599
GOTERM_MF_FAT	GO:0030247~polysaccharide binding	11	4.0145985401	5.10023464624959E-005	5168, 60484, 11167, 2247, 3827, 3053, 1634, 5549, 1289, 157869, 1462	179	154	12983	5.1807661612	0.019044689	0.0095681189	0.0705020191
GOTERM_MF_FAT	GO:0001871~pattern binding	11	4.0145985401	5.10023464624959E-005	5168, 60484, 11167, 2247, 3827, 3053, 1634, 5549, 1289, 157869, 1462	179	154	12983	5.1807661612	0.019044689	0.0095681189	0.0705020191
GOTERM_MF_FAT	GO:0005201~extracellular matrix structural constituent	8	2.9197080292	0.0001747694	1281, 30008, 1298, 2199, 1299, 5549, 1289, 2201	179	86	12983	6.747044303	0.0637697302	0.0217251405	0.2413971106
GOTERM_BP_FAT	GO:0060284~regulation of cell development	12	4.3795620438	0.0001250461	388585, 4825, 7070, 2247, 390992, 152330, 5176, 7077, 1141, 79006, 4504, 7043	187	205	13528	4.2346680579	0.1753804255	0.0238159554	0.2082584529
GOTERM_BP_FAT	GO:0010648~negative regulation of cell communication	13	4.7445255474	0.0001646397	23089, 8490, 3488, 26585, 10395, 27122, 7070, 56033, 340665, 259, 1816, 7043, 551	187	248	13528	3.7921338623	0.2242269972	0.0278163884	0.2741147573
GOTERM_CC_FAT	GO:0005604~basement membrane	7	2.5547445255	0.0011739661	80144, 30008, 7077, 1289, 64856, 7078, 3908	195	78	12782	5.8825772518	0.2313525618	0.0288126422	1.4884126864
GOTERM_BP_FAT	GO:0051960~regulation of nervous system development	11	4.0145985401	0.0003237627	388585, 4825, 7070, 2247, 390992, 152330, 5176, 7077, 1141, 79006, 4504	187	192	13528	4.1446078431	0.3930584975	0.0487061621	0.5383731444
GOTERM_CC_FAT	GO:0009986~cell surface	14	5.1094890511	0.0025364167	7293, 26585, 55867, 2719, 349667, 2243, 80144, 7070, 55540, 3678, 7077, 1141, 11093, 7043	195	348	12782	2.6370173887	0.4338403097	0.0553000454	3.1901838815
GOTERM_MF_FAT	GO:0005539~glycosaminoglycan binding	9	3.2846715328	0.0006848675	60484, 11167, 2247, 3827, 3053, 1634, 5549, 1289, 1462	179	140	12983	4.6626895451	0.227623764	0.0625303302	0.9428731173
GOTERM_BP_FAT	GO:0050767~regulation of neurogenesis	10	3.6496350365	0.0004783428	388585, 4825, 7070, 390992, 152330, 5176, 7077, 1141, 79006, 4504	187	166	13528	4.3579666259	0.5218261943	0.0648711954	0.7944566741
GOTERM_CC_FAT	GO:0005593~FACIT collagen	3	1.0948905109	0.0033024163	1307, 1298, 1299	195	6	12782	32.7743589744	0.5233464727	0.0651418681	4.1350162719
GOTERM_CC_FAT	GO:0009897~external side of plasma membrane	9	3.2846715328	0.0044055403	80144, 7070, 7293, 3678, 1141, 55867, 2719, 2243, 349667	195	170	12782	3.4702262443	0.6280594338	0.079113452	5.480753108
GOTERM_MF_FAT	GO:0004252~serine-type endopeptidase activity	9	3.2846715328	0.0012732049	3250, 2158, 716, 339906, 11223, 25823, 54760, 377047, 3818	179	154	12983	4.2388086774	0.381404742	0.0915912322	1.7462585883
GOTERM_BP_FAT	GO:0009968~negative regulation of signal transduction	11	4.0145985401	0.0009656978	27122, 23089, 7070, 56033, 340665, 8490, 3488, 259, 26585, 10395, 7043	187	221	13528	3.6007452755	0.7745879964	0.1167545275	1.5977769777
GOTERM_MF_FAT	GO:0004175~endopeptidase activity	14	5.1094890511	0.0019916115	3250, 2158, 4313, 339906, 23089, 11223, 11173, 162540, 377047, 3818, 716, 25823, 54760, 11093	179	375	12983	2.7078137803	0.5283821245	0.1177363704	2.7190584686
GOTERM_BP_FAT	GO:0034330~cell junction organization	6	2.1897810219	0.0010928493	149461, 3982, 7070, 3678, 10395, 7043	187	57	13528	7.614973262	0.814758546	0.1216407731	1.8063562581
GOTERM_BP_FAT	GO:0030336~negative regulation of cell migration	6	2.1897810219	0.0010928493	7070, 2247, 3488, 26585, 1816, 10395	187	57	13528	7.614973262	0.814758546	0.1216407731	1.8063562581
GOTERM_CC_FAT	GO:0044459~plasma membrane part	48	17.5182481752	0.0079136171	5168, 2914, 2812, 5737, 80758, 7293, 11075, 10979, 219770, 10991, 55867, 2911, 10395, 349667, 9201, 80144, 3982, 55540, 57381, 3678, 25823, 93107, 339451, 8549, 7043, 149461, 91608, 9358, 91624, 56666, 815, 92359, 10590, 8082, 2719, 2243, 7070, 116085, 2848, 10786, 84168, 5100, 1141, 64240, 1816, 730, 733, 51289	195	2203	12782	1.4282062921	0.8313115069	0.1279426732	9.6455101735
GOTERM_MF_FAT	GO:0004866~endopeptidase inhibitor activity	8	2.9197080292	0.0038277396	1293, 5176, 3827, 7077, 3053, 259, 7078, 866	179	145	12983	4.0016952418	0.7644487431	0.1346166351	5.1649218471
GOTERM_MF_FAT	GO:0030246~carbohydrate binding	13	4.7445255474	0.0035313533	5168, 60484, 3827, 157869, 5549, 9902, 400797, 11167, 2247, 1289, 1634, 3053, 1462	179	354	12983	2.6635577439	0.7364932797	0.137729513	4.7740132532
KEGG_PATHWAY	hsa04512:ECM-receptor interaction	6	2.1897810219	0.0044279245	2812, 1293, 1281, 3678, 1289, 3908	67	84	5085	5.421108742	0.2702700384	0.1457576681	4.5015577655
GOTERM_MF_FAT	GO:0017171~serine hydrolase activity	9	3.2846715328	0.0033764622	3250, 2158, 716, 339906, 11223, 25823, 54760, 377047, 3818	179	180	12983	3.6265363128	0.7205914136	0.1473319922	4.5691308704
GOTERM_BP_FAT	GO:0040013~negative regulation of locomotion	6	2.1897810219	0.0014856313	7070, 2247, 3488, 26585, 1816, 10395	187	61	13528	7.115630753	0.8989911203	0.151048607	2.4480536612
GOTERM_MF_FAT	GO:0008236~serine-type peptidase activity	9	3.2846715328	0.0031558742	3250, 2158, 716, 339906, 11223, 25823, 54760, 377047, 3818	179	178	12983	3.6672839119	0.6962790435	0.1565335304	4.2766417166
GOTERM_MF_FAT	GO:0030414~peptidase inhibitor activity	8	2.9197080292	0.0051331124	1293, 5176, 3827, 7077, 3053, 259, 7078, 866	179	153	12983	3.7924562749	0.8563200732	0.1616996542	6.8689468584
GOTERM_BP_FAT	GO:0051271~negative regulation of cell motion	6	2.1897810219	0.0017169373	7070, 2247, 3488, 26585, 1816, 10395	187	63	13528	6.8897377133	0.9293341466	0.1619293326	2.8240974989
GOTERM_MF_FAT	GO:0032403~protein complex binding	9	3.2846715328	0.0056284807	10516, 1307, 1281, 7070, 3678, 7077, 1289, 259, 11093	179	196	12983	3.3304925322	0.8809166219	0.1624946394	7.5081292163
GOTERM_BP_FAT	GO:0045664~regulation of neuron differentiation	8	2.9197080292	0.0024090327	388585, 4825, 7070, 390992, 152330, 7077, 1141, 79006	187	133	13528	4.3514132926	0.9757468798	0.1696936087	3.9411438888
GOTERM_BP_FAT	GO:0034329~cell junction assembly	5	1.8248175182	0.0023552362	149461, 3982, 7070, 3678, 10395	187	41	13528	8.8222251206	0.9736439587	0.1741742309	3.8547505553
GOTERM_BP_FAT	GO:0030334~regulation of cell migration	9	3.2846715328	0.0023274723	5168, 91624, 7070, 2247, 3488, 26585, 1816, 10395, 3908	187	169	13528	3.8525456444	0.9724883394	0.1809574032	3.8101351166
GOTERM_BP_FAT	GO:0007229~integrin-mediated signaling pathway	6	2.1897810219	0.002736912	1307, 1281, 9358, 3678, 11173, 11093	187	70	13528	6.2007639419	0.9853908056	0.1822863434	4.4661192249
GOTERM_BP_FAT	GO:0031589~cell-substrate adhesion	7	2.5547445255	0.0023047656	10516, 1281, 9358, 7070, 84168, 11093, 10395	187	98	13528	5.167303285	0.9715056751	0.1888457768	3.7736319405
GOTERM_BP_FAT	GO:0022604~regulation of cell morphogenesis	8	2.9197080292	0.0022112008	2620, 7070, 57381, 1141, 10979, 79006, 10395, 7043	187	131	13528	4.4178470833	0.9670724964	0.1921189424	3.6230802721
GOTERM_MF_FAT	GO:0005509~calcium ion binding	23	8.3941605839	0.0074134697	10516, 2158, 4313, 30008, 10590, 9379, 5924, 10398, 9902, 7429, 716, 9104, 80144, 57333, 11167, 4638, 2199, 3678, 5100, 1462, 11093, 2202, 2201	179	919	12983	1.8152412447	0.9395107389	0.1940966806	9.7777339485
GOTERM_MF_FAT	GO:0070011~peptidase activity, acting on L-amino acid peptides	16	5.8394160584	0.0085684034	3250, 2158, 4313, 23089, 339906, 11223, 11173, 162540, 10404, 377047, 3818, 716, 25823, 54760, 11093, 1369	179	549	12983	2.1138280876	0.9610005153	0.2068390071	11.218579805
GOTERM_BP_FAT	GO:0045777~positive regulation of blood pressure	4	1.4598540146	0.003698794	2053, 2837, 1816, 551	187	23	13528	12.5812601721	0.9967009293	0.2287421116	5.9906927643
GOTERM_BP_FAT	GO:0048878~chemical homeostasis	16	5.8394160584	0.0047585468	2053, 3250, 3827, 150209, 345, 5009, 6927, 9104, 2837, 1141, 64240, 1816, 4504, 730, 551, 51289	187	512	13528	2.2606951872	0.999360736	0.263956734	7.6438985682
GOTERM_BP_FAT	GO:0051270~regulation of cell motion	9	3.2846715328	0.0052367419	5168, 91624, 7070, 2247, 3488, 26585, 1816, 10395, 3908	187	193	13528	3.3734726109	0.9996953276	0.2675755889	8.3808960381
GOTERM_BP_FAT	GO:0040012~regulation of locomotion	9	3.2846715328	0.0050858089	5168, 91624, 7070, 2247, 3488, 26585, 1816, 10395, 3908	187	192	13528	3.3910427807	0.9996150232	0.2698410994	8.1488763296
GOTERM_BP_FAT	GO:0021675~nerve development	4	1.4598540146	0.0047078993	4902, 3110, 390992, 1141	187	25	13528	11.5747593583	0.9993085524	0.2712170076	7.5655147919
GOTERM_MF_FAT	GO:0008233~peptidase activity	16	5.8394160584	0.0125351137	3250, 2158, 4313, 23089, 339906, 11223, 11173, 162540, 10404, 377047, 3818, 716, 25823, 54760, 11093, 1369	179	574	12983	2.0217624044	0.9913966752	0.2716986956	16.0063288543
GOTERM_MF_FAT	GO:0008201~heparin binding	6	2.1897810219	0.0136234051	11167, 2247, 3827, 3053, 5549, 1289	179	103	12983	4.2250908499	0.9943229855	0.2761767983	17.2773597652
GOTERM_BP_FAT	GO:0003002~regionalization	9	3.2846715328	0.0059159682	25806, 3110, 4825, 390992, 56033, 340665, 1044, 5100, 26585	187	197	13528	3.3049757051	0.9998937286	0.2787492015	9.4182259488
GOTERM_BP_FAT	GO:0006875~cellular metal ion homeostasis	9	3.2846715328	0.005740542	2053, 9104, 2837, 3827, 4504, 1816, 730, 551, 51289	187	196	13528	3.321837826	0.9998604965	0.2802082645	9.1513737205
GOTERM_BP_FAT	GO:0000904~cell morphogenesis involved in differentiation	10	3.6496350365	0.0065851991	1409, 9201, 25806, 90249, 152330, 84168, 1141, 1462, 1943, 349667	187	244	13528	2.9648461471	0.9999623794	0.2879439337	10.4294847158
GOTERM_BP_FAT	GO:0051046~regulation of secretion	9	3.2846715328	0.0068457427	6927, 4825, 2837, 815, 2247, 7293, 1141, 551, 7043	187	202	13528	3.2231693758	0.9999748947	0.2894325451	10.8203081863
GOTERM_BP_FAT	GO:0007160~cell-matrix adhesion	6	2.1897810219	0.0076198193	10516, 1281, 9358, 7070, 11093, 10395	187	89	13528	4.8770053476	0.999992456	0.2931272231	11.9720124528
GOTERM_BP_FAT	GO:0003014~renal system process	4	1.4598540146	0.0065065676	2837, 3827, 1141, 551	187	28	13528	10.3346065699	0.9999574959	0.2932655942	10.3112191201
GOTERM_BP_FAT	GO:0030182~neuron differentiation	14	5.1094890511	0.0075618296	388585, 3110, 11075, 152330, 1943, 349667, 9201, 4902, 4825, 90249, 25806, 7070, 1141, 1462	187	438	13528	2.3123092325	0.9999917447	0.2986066401	11.8862196753
GOTERM_BP_FAT	GO:0055065~metal ion homeostasis	9	3.2846715328	0.0074305267	2053, 9104, 2837, 3827, 4504, 1816, 730, 551, 51289	187	205	13528	3.1760010434	0.9999898765	0.3019017397	11.691673371
GOTERM_BP_FAT	GO:0030003~cellular cation homeostasis	10	3.6496350365	0.0085696803	3250, 2053, 9104, 2837, 3827, 4504, 1816, 730, 551, 51289	187	254	13528	2.8481199208	0.9999982769	0.3155794416	13.3661534949
GOTERM_BP_FAT	GO:0030168~platelet activation	4	1.4598540146	0.0094640336	2812, 1281, 11093, 2243	187	32	13528	9.0427807487	0.9999995715	0.3345598255	14.6598294151
GOTERM_BP_FAT	GO:0044057~regulation of system process	11	4.0145985401	0.0104611737	2053, 2837, 815, 152330, 1141, 64240, 1816, 2911, 10398, 551, 3908	187	309	13528	2.5752903103	0.9999999093	0.3548503181	16.08076775
GOTERM_BP_FAT	GO:0002526~acute inflammatory response	6	2.1897810219	0.0112997101	2053, 716, 3818, 3075, 730, 733	187	98	13528	4.4291171014	0.9999999755	0.3619359031	17.2584479496
GOTERM_BP_FAT	GO:0050801~ion homeostasis	13	4.7445255474	0.0110206627	3250, 2053, 3827, 150209, 5009, 9104, 2837, 1141, 1816, 4504, 730, 551, 51289	187	409	13528	2.2993867918	0.9999999621	0.3621737751	16.8682763668
GOTERM_BP_FAT	GO:0051345~positive regulation of hydrolase activity	8	2.9197080292	0.0119016203	668, 9104, 7070, 124274, 1816, 150209, 10395, 51289	187	179	13528	3.2331730051	0.9999999904	0.3697001353	18.0942016038
GOTERM_BP_FAT	GO:0042063~gliogenesis	5	1.8248175182	0.0122085421	716, 4825, 2247, 79006, 1462	187	65	13528	5.564788153	0.9999999941	0.3699689367	18.5173021184
GOTERM_BP_FAT	GO:0006873~cellular ion homeostasis	12	4.3795620438	0.0144228965	3250, 2053, 9104, 2837, 3827, 1141, 4504, 1816, 150209, 730, 551, 51289	187	374	13528	2.3211415825	0.9999999998	0.4060605376	21.5095227958
GOTERM_BP_FAT	GO:0048592~eye morphogenesis	5	1.8248175182	0.0149457898	1409, 668, 25806, 7070, 1289	187	69	13528	5.2421917384	0.9999999999	0.4100606875	22.2008648321
GOTERM_BP_FAT	GO:0030198~extracellular matrix organization	6	2.1897810219	0.0143335941	10516, 1281, 4629, 1634, 1289, 64856	187	104	13528	4.1735911148	0.9999999998	0.4114277612	21.3908759401
GOTERM_BP_FAT	GO:0055082~cellular chemical homeostasis	12	4.3795620438	0.0160551099	3250, 2053, 9104, 2837, 3827, 1141, 4504, 1816, 150209, 730, 551, 51289	187	380	13528	2.2844919786	1	0.418743072	23.6486414083
GOTERM_BP_FAT	GO:0051969~regulation of transmission of nerve impulse	7	2.5547445255	0.015992782	815, 152330, 1141, 1816, 2911, 551, 3908	187	147	13528	3.4448688566	1	0.4244612929	23.5679732553
GOTERM_BP_FAT	GO:0006957~complement activation, alternative pathway	3	1.0948905109	0.0175526929	3075, 730, 733	187	15	13528	14.4684491979	1	0.4272338716	25.5630002515
GOTERM_BP_FAT	GO:0055080~cation homeostasis	10	3.6496350365	0.0174762518	3250, 2053, 9104, 2837, 3827, 4504, 1816, 730, 551, 51289	187	286	13528	2.5294491605	1	0.4324283625	25.4663885778
GOTERM_BP_FAT	GO:0007409~axonogenesis	8	2.9197080292	0.0173557947	9201, 25806, 90249, 152330, 1141, 1462, 1943, 349667	187	193	13528	2.9986423208	1	0.4369670075	25.313907173
GOTERM_BP_FAT	GO:0006760~folic acid and derivative metabolic process	3	1.0948905109	0.0198809036	441024, 10841, 51268	187	16	13528	13.564171123	1	0.4424755368	28.4497844853
GOTERM_BP_FAT	GO:0016485~protein processing	6	2.1897810219	0.0191689159	716, 11093, 3818, 3075, 730, 733	187	112	13528	3.8754774637	1	0.4430082067	27.5783468746
GOTERM_BP_FAT	GO:0006956~complement activation	4	1.4598540146	0.0198250298	716, 3075, 730, 733	187	42	13528	6.8897377133	1	0.4477718599	28.3817558397
GOTERM_BP_FAT	GO:0031644~regulation of neurological system process	7	2.5547445255	0.0190956274	815, 152330, 1141, 1816, 2911, 551, 3908	187	153	13528	3.3097759603	1	0.4482192843	27.4880813118
GOTERM_BP_FAT	GO:0060341~regulation of cellular localization	9	3.2846715328	0.0214214052	1409, 6927, 4825, 815, 2247, 7293, 1141, 551, 7043	187	248	13528	2.6253234432	1	0.4550734624	30.3016607442
GOTERM_BP_FAT	GO:0002541~activation of plasma proteins involved in acute inflammatory response	4	1.4598540146	0.021101185	716, 3075, 730, 733	187	43	13528	6.7295112548	1	0.4561078222	29.9204656081
GOTERM_BP_FAT	GO:0031018~endocrine pancreas development	3	1.0948905109	0.0223305102	3110, 6927, 4825	187	17	13528	12.766278704	1	0.4630529866	31.3732795262
GOTERM_MF_FAT	GO:0005198~structural molecule activity	16	5.8394160584	0.0278972692	1409, 1307, 149461, 1281, 30008, 57642, 1298, 1299, 5549, 10398, 3908, 3982, 2199, 4629, 1289, 2201	179	634	12983	1.8304284229	0.999976693	0.4660517748	32.3782969742
GOTERM_BP_FAT	GO:0006959~humoral immune response	5	1.8248175182	0.0233875567	716, 3110, 3075, 730, 733	187	79	13528	4.5786231639	1	0.4728188066	32.5998090589
GOTERM_BP_FAT	GO:0051604~protein maturation	6	2.1897810219	0.0265790607	716, 11093, 3818, 3075, 730, 733	187	122	13528	3.5578153765	1	0.488286715	36.1791852948
GOTERM_BP_FAT	GO:0048598~embryonic morphogenesis	10	3.6496350365	0.026217817	668, 25806, 6927, 390992, 3209, 5100, 26585, 10395, 2201, 7043	187	307	13528	2.3564249508	1	0.4891068897	35.7831961522
GOTERM_BP_FAT	GO:0051241~negative regulation of multicellular organismal process	7	2.5547445255	0.0258140342	2837, 3827, 64240, 345, 3818, 1816, 551	187	164	13528	3.0877787922	1	0.4893821077	35.3378432333
GOTERM_BP_FAT	GO:0048667~cell morphogenesis involved in neuron differentiation	8	2.9197080292	0.0255305524	9201, 25806, 90249, 152330, 1141, 1462, 1943, 349667	187	209	13528	2.7690811862	1	0.4913126269	35.0234436565
GOTERM_BP_FAT	GO:0031175~neuron projection development	9	3.2846715328	0.0253052673	9201, 4902, 25806, 90249, 152330, 1141, 1462, 1943, 349667	187	256	13528	2.5432820856	1	0.4941068436	34.7725638457
GOTERM_BP_FAT	GO:0048812~neuron projection morphogenesis	8	2.9197080292	0.0279312149	9201, 25806, 90249, 152330, 1141, 1462, 1943, 349667	187	213	13528	2.7170796616	1	0.494670642	37.6411113834
GOTERM_BP_FAT	GO:0019725~cellular homeostasis	13	4.7445255474	0.0275419725	3250, 2053, 3827, 150209, 9104, 2837, 116085, 1141, 1816, 4504, 730, 551, 51289	187	466	13528	2.0181313259	1	0.4951934303	37.2235285699
GOTERM_CC_FAT	GO:0031226~intrinsic to plasma membrane	27	9.8540145985	0.0458001674	5168, 2914, 2812, 5737, 7293, 10991, 55867, 2911, 349667, 9201, 55540, 3678, 93107, 25823, 8549, 9358, 8082, 2719, 7070, 2848, 10786, 1141, 5100, 1816, 730, 733, 51289	195	1215	12782	1.4566381766	0.9999725077	0.5034677993	45.0370971323
GOTERM_MF_FAT	GO:0004857~enzyme inhibitor activity	9	3.2846715328	0.03292791	1293, 5176, 3827, 7077, 3053, 259, 7078, 866, 345	179	270	12983	2.4176908752	0.999996704	0.5040433891	37.059859408
GOTERM_CC_FAT	GO:0005594~collagen type IX	2	0.7299270073	0.0448486541	1298, 1299	195	3	12782	43.6991452991	0.9999656307	0.5200952246	44.33328027
GOTERM_BP_FAT	GO:0051605~protein maturation by peptide bond cleavage	5	1.8248175182	0.0307228365	716, 3818, 3075, 730, 733	187	86	13528	4.2059445343	1	0.5230153484	40.5603579698
GOTERM_BP_FAT	GO:0007389~pattern specification process	9	3.2846715328	0.0313935903	25806, 3110, 4825, 390992, 56033, 340665, 1044, 5100, 26585	187	267	13528	2.4385026738	1	0.5253740744	41.2423763919
GOTERM_CC_FAT	GO:0030054~cell junction	14	5.1094890511	0.0522010484	149461, 91624, 56666, 815, 92359, 80758, 8082, 10979, 219770, 10395, 3982, 3678, 1141, 339451	195	518	12782	1.7715869716	0.9999939126	0.5279074627	49.5626411208
GOTERM_MF_FAT	GO:0004867~serine-type endopeptidase inhibitor activity	5	1.8248175182	0.0376196055	1293, 5176, 3053, 259, 866	179	92	12983	3.9418872966	0.9999994731	0.5327333364	41.1532845009
GOTERM_CC_FAT	GO:0005887~integral to plasma membrane	26	9.4890510949	0.0583783526	5168, 2914, 2812, 5737, 7293, 10991, 55867, 2911, 9201, 55540, 3678, 93107, 25823, 8549, 9358, 8082, 2719, 7070, 2848, 10786, 1141, 5100, 1816, 730, 733, 51289	195	1188	12782	1.4345679012	0.9999985929	0.54732803	53.6020567205
KEGG_PATHWAY	hsa04510:Focal adhesion	7	2.5547445255	0.0450066348	1293, 1281, 4638, 3678, 1289, 10398, 3908	67	201	5085	2.6431276454	0.961978858	0.5584231579	37.9959306092
GOTERM_BP_FAT	GO:0010001~glial cell differentiation	4	1.4598540146	0.0362803012	716, 4825, 2247, 79006	187	53	13528	5.4597921501	1	0.5728037896	45.9936319794
GOTERM_BP_FAT	GO:0008360~regulation of cell shape	4	1.4598540146	0.0380376221	2620, 57381, 10979, 10395	187	54	13528	5.3586848881	1	0.5744048001	47.612119142
GOTERM_BP_FAT	GO:0050804~regulation of synaptic transmission	6	2.1897810219	0.0396870369	815, 152330, 1141, 1816, 2911, 3908	187	136	13528	3.191569676	1	0.5748909673	49.089646946
GOTERM_BP_FAT	GO:0051051~negative regulation of transport	6	2.1897810219	0.0386411847	1409, 2837, 7293, 64240, 29993, 345	187	135	13528	3.2152109329	1	0.5750847993	48.1573987885
GOTERM_BP_FAT	GO:0006874~cellular calcium ion homeostasis	7	2.5547445255	0.0408027541	2053, 9104, 2837, 3827, 1816, 551, 51289	187	183	13528	2.7671897373	1	0.575354135	50.0667859885
GOTERM_BP_FAT	GO:0032583~regulation of gene-specific transcription	6	2.1897810219	0.0376124175	388585, 6927, 4825, 390992, 7293, 7043	187	134	13528	3.2392050443	1	0.5754694617	47.2247423829
GOTERM_BP_FAT	GO:0007044~cell-substrate junction assembly	3	1.0948905109	0.0393734376	7070, 3678, 10395	187	23	13528	9.435945129	1	0.5769638363	48.8117792847
GOTERM_BP_FAT	GO:0002253~activation of immune response	5	1.8248175182	0.0405934212	716, 7070, 3075, 730, 733	187	94	13528	3.8479918079	1	0.5783277533	49.8848075703
GOTERM_BP_FAT	GO:0030005~cellular di-, tri-valent inorganic cation homeostasis	8	2.9197080292	0.037513135	3250, 2053, 9104, 2837, 3827, 1816, 551, 51289	187	227	13528	2.5495064666	1	0.5798030172	47.1339055649
KEGG_PATHWAY	hsa04530:Tight junction	5	1.8248175182	0.0952435018	149461, 83700, 92359, 4629, 10398	67	134	5085	2.8319224772	0.9991801178	0.5886429591	64.6137080524
GOTERM_BP_FAT	GO:0055074~calcium ion homeostasis	7	2.5547445255	0.0455160973	2053, 9104, 2837, 3827, 1816, 551, 51289	187	188	13528	2.6935942656	1	0.6018552887	54.0034450401
GOTERM_BP_FAT	GO:0048666~neuron development	10	3.6496350365	0.044808853	9201, 4902, 25806, 90249, 7070, 152330, 1141, 1462, 1943, 349667	187	339	13528	2.1339895572	1	0.6055041535	53.4319566335
GOTERM_CC_FAT	GO:0031253~cell projection membrane	4	1.4598540146	0.0759552986	116085, 3678, 84168, 1816	195	65	12782	4.0337672584	0.9999999793	0.6059618213	63.5223951361
GOTERM_BP_FAT	GO:0007588~excretion	4	1.4598540146	0.0454923753	3827, 1141, 64240, 551	187	58	13528	4.9891204131	1	0.6063929868	53.9843838153
GOTERM_BP_FAT	GO:0032989~cellular component morphogenesis	11	4.0145985401	0.0477960024	1409, 9201, 25806, 90249, 152330, 4629, 84168, 1141, 1462, 1943, 349667	187	397	13528	2.004445103	1	0.6109362589	55.8011655388
GOTERM_BP_FAT	GO:0055066~di-, tri-valent inorganic cation homeostasis	8	2.9197080292	0.0473032819	3250, 2053, 9104, 2837, 3827, 1816, 551, 51289	187	239	13528	2.4214977737	1	0.6116561311	55.418339836
KEGG_PATHWAY	hsa04020:Calcium signaling pathway	6	2.1897810219	0.0771255294	5737, 815, 4638, 5136, 1816, 2911	67	176	5085	2.5873473541	0.9966493668	0.6131691083	56.5280312965
GOTERM_CC_FAT	GO:0042383~sarcolemma	4	1.4598540146	0.0815326626	1293, 8082, 7043, 3908	195	67	12782	3.9133562954	0.9999999947	0.6142431696	66.2354990545
GOTERM_CC_FAT	GO:0005886~plasma membrane	68	24.8175182482	0.0743307171	2914, 64096, 5168, 1293, 83700, 2812, 5737, 118442, 7293, 10991, 150209, 2911, 10395, 9201, 80144, 55540, 57381, 3678, 25823, 93107, 149461, 196740, 2158, 9358, 4313, 91624, 92359, 5924, 2719, 1943, 7070, 2848, 1141, 1816, 730, 733, 80758, 11075, 10979, 219770, 124274, 55867, 349667, 3908, 90249, 257629, 3982, 2837, 339451, 8549, 7043, 91608, 56666, 815, 10590, 64106, 152330, 8082, 2243, 8174, 11…	195	3777	12782	1.1801198889	0.9999999694	0.6175613997	62.6951446776
KEGG_PATHWAY	hsa04514:Cell adhesion molecules (CAMs)	5	1.8248175182	0.0913213727	149461, 83700, 8174, 9379, 1462	67	132	5085	2.8748303935	0.9988853661	0.6214164416	62.9887803849
KEGG_PATHWAY	hsa04670:Leukocyte transendothelial migration	5	1.8248175182	0.0661814408	149461, 83700, 4313, 7070, 10398	67	118	5085	3.2159119656	0.9922618423	0.621794783	50.8697110547
GOTERM_BP_FAT	GO:0002009~morphogenesis of an epithelium	5	1.8248175182	0.0505444953	80144, 5100, 26585, 2719, 10395	187	101	13528	3.5812993064	1	0.6274509633	57.8805694147
KEGG_PATHWAY	hsa04950:Maturity onset diabetes of the young	3	1.0948905109	0.0410909252	3110, 6927, 4825	67	25	5085	9.1074626866	0.9491609489	0.6295475439	35.3058877466
GOTERM_BP_FAT	GO:0007589~body fluid secretion	3	1.0948905109	0.0527183792	3827, 6343, 551	187	27	13528	8.0380273321	1	0.6343870589	59.4597374129
GOTERM_BP_FAT	GO:0042592~homeostatic process	17	6.204379562	0.0543766276	2053, 3250, 3827, 150209, 345, 5009, 6927, 9104, 2837, 116085, 1141, 64240, 1816, 4504, 730, 551, 51289	187	751	13528	1.6375741436	1	0.6373400958	60.6267306224
GOTERM_BP_FAT	GO:0048858~cell projection morphogenesis	8	2.9197080292	0.0525208289	9201, 25806, 90249, 152330, 1141, 1462, 1943, 349667	187	245	13528	2.3621957874	1	0.6374269428	59.3185639989
GOTERM_BP_FAT	GO:0032963~collagen metabolic process	3	1.0948905109	0.056273134	1281, 4313, 1289	187	28	13528	7.7509549274	1	0.6375576787	61.9226686532
GOTERM_BP_FAT	GO:0022601~menstrual cycle phase	2	0.7299270073	0.0538790022	668, 7043	187	4	13528	36.1711229947	1	0.6382156391	60.279885598
GOTERM_BP_FAT	GO:0006631~fatty acid metabolic process	7	2.5547445255	0.0558758965	2053, 26027, 6927, 348158, 123099, 51179, 8529	187	198	13528	2.5575541511	1	0.6390790731	61.6545905528
GOTERM_BP_FAT	GO:0046903~secretion	9	3.2846715328	0.0555862623	2914, 6927, 54760, 3827, 1141, 64240, 6343, 10815, 551	187	300	13528	2.1702673797	1	0.6413637474	61.4580118871
GOTERM_BP_FAT	GO:0000902~cell morphogenesis	10	3.6496350365	0.0576173268	1409, 9201, 25806, 90249, 152330, 84168, 1141, 1462, 1943, 349667	187	356	13528	2.0320855615	1	0.6423434982	62.8167964432
GOTERM_BP_FAT	GO:0006958~complement activation, classical pathway	3	1.0948905109	0.0599093019	716, 730, 733	187	29	13528	7.4836806196	1	0.6489572298	64.2960099503
GOTERM_BP_FAT	GO:0043588~skin development	3	1.0948905109	0.0599093019	80144, 1281, 1289	187	29	13528	7.4836806196	1	0.6489572298	64.2960099503
GOTERM_BP_FAT	GO:0007610~behavior	12	4.3795620438	0.0593114858	5168, 2914, 2837, 2247, 3678, 9547, 3053, 1141, 4861, 1816, 2911, 551	187	469	13528	1.850974311	1	0.6492168303	63.9156122738
GOTERM_BP_FAT	GO:0032990~cell part morphogenesis	8	2.9197080292	0.0636588498	9201, 25806, 90249, 152330, 1141, 1462, 1943, 349667	187	256	13528	2.2606951872	1	0.6600634603	66.5972631748
GOTERM_BP_FAT	GO:0030510~regulation of BMP signaling pathway	3	1.0948905109	0.0636239995	3209, 26585, 2719	187	30	13528	7.2342245989	1	0.6637772269	66.5765312814
GOTERM_BP_FAT	GO:0051047~positive regulation of secretion	5	1.8248175182	0.0634087414	4825, 7293, 1141, 551, 7043	187	109	13528	3.3184516509	1	0.6664546128	66.44820926
GOTERM_BP_FAT	GO:0044259~multicellular organismal macromolecule metabolic process	3	1.0948905109	0.0674144065	1281, 4313, 1289	187	31	13528	7.0008625151	1	0.6702808957	68.7619007295
GOTERM_BP_FAT	GO:0002455~humoral immune response mediated by circulating immunoglobulin	3	1.0948905109	0.0674144065	716, 730, 733	187	31	13528	7.0008625151	1	0.6702808957	68.7619007295
GOTERM_BP_FAT	GO:0008361~regulation of cell size	7	2.5547445255	0.0661607142	9201, 2837, 2273, 2247, 26585, 551, 7043	187	206	13528	2.4582316598	1	0.6707923647	68.0544024343
GOTERM_BP_FAT	GO:0032964~collagen biosynthetic process	2	0.7299270073	0.0668913141	1281, 1289	187	5	13528	28.9368983957	1	0.6711207461	68.4685128883
GOTERM_BP_FAT	GO:0045924~regulation of female receptivity	2	0.7299270073	0.0668913141	1816, 551	187	5	13528	28.9368983957	1	0.6711207461	68.4685128883
GOTERM_BP_FAT	GO:0060180~female mating behavior	2	0.7299270073	0.0668913141	1816, 551	187	5	13528	28.9368983957	1	0.6711207461	68.4685128883
GOTERM_BP_FAT	GO:0031099~regeneration	4	1.4598540146	0.0693651593	1462, 7078, 2243, 349667	187	69	13528	4.1937533907	1	0.6773349255	69.8335498382
GOTERM_BP_FAT	GO:0010720~positive regulation of cell development	4	1.4598540146	0.0693651593	4825, 5176, 79006, 7043	187	69	13528	4.1937533907	1	0.6773349255	69.8335498382
GOTERM_MF_FAT	GO:0005179~hormone activity	5	1.8248175182	0.0611702717	1442, 79924, 7276, 6343, 551	179	108	12983	3.3579039934	1	0.6957281282	58.2231310239
GOTERM_BP_FAT	GO:0043062~extracellular structure organization	6	2.1897810219	0.0741282968	10516, 1281, 4629, 1634, 1289, 64856	187	163	13528	2.6629047603	1	0.6986969382	72.3067924761
GOTERM_BP_FAT	GO:0006939~smooth muscle contraction	3	1.0948905109	0.0752113766	4629, 3827, 1141	187	33	13528	6.5765678172	1	0.700515039	72.8419291988
GOTERM_BP_FAT	GO:0042320~regulation of circadian sleep/wake cycle, REM sleep	2	0.7299270073	0.0797256123	2837, 1141	187	6	13528	24.1140819964	1	0.7187359875	74.9694178264
GOTERM_BP_FAT	GO:0032535~regulation of cellular component size	8	2.9197080292	0.0811238762	9201, 2837, 2273, 2247, 26585, 7429, 551, 7043	187	271	13528	2.1355644572	1	0.7216880887	75.5959423363
GOTERM_BP_FAT	GO:0003073~regulation of systemic arterial blood pressure	3	1.0948905109	0.0832788683	2837, 1816, 551	187	35	13528	6.2007639419	1	0.7279438645	76.5327413003
GOTERM_BP_FAT	GO:0045216~cell-cell junction organization	3	1.0948905109	0.0832788683	149461, 3982, 7043	187	35	13528	6.2007639419	1	0.7279438645	76.5327413003
GOTERM_BP_FAT	GO:0031016~pancreas development	3	1.0948905109	0.0832788683	3110, 6927, 4825	187	35	13528	6.2007639419	1	0.7279438645	76.5327413003
GOTERM_BP_FAT	GO:0051705~behavioral interaction between organisms	3	1.0948905109	0.0832788683	1141, 1816, 551	187	35	13528	6.2007639419	1	0.7279438645	76.5327413003
GOTERM_BP_FAT	GO:0006508~proteolysis	21	7.6642335766	0.0881242494	3250, 2158, 4313, 23089, 339906, 79589, 11223, 10404, 11173, 377047, 3818, 10425, 716, 92591, 54760, 25823, 11093, 3075, 730, 733, 1369	187	1054	13528	1.4413540472	1	0.7453350288	78.5170898308
GOTERM_BP_FAT	GO:0010769~regulation of cell morphogenesis involved in differentiation	4	1.4598540146	0.0896047968	7070, 1141, 79006, 7043	187	77	13528	3.7580387527	1	0.7480798812	79.0912347197
GOTERM_BP_FAT	GO:0032375~negative regulation of cholesterol transport	2	0.7299270073	0.0923843193	64240, 345	187	7	13528	20.6692131398	1	0.7526473681	80.1303608225
GOTERM_BP_FAT	GO:0043206~fibril organization	2	0.7299270073	0.0923843193	1281, 1289	187	7	13528	20.6692131398	1	0.7526473681	80.1303608225
GOTERM_BP_FAT	GO:0032372~negative regulation of sterol transport	2	0.7299270073	0.0923843193	64240, 345	187	7	13528	20.6692131398	1	0.7526473681	80.1303608225
GOTERM_BP_FAT	GO:0044236~multicellular organismal metabolic process	3	1.0948905109	0.0915964751	1281, 4313, 1289	187	37	13528	5.8655875126	1	0.7527850245	79.8408647456
GOTERM_BP_FAT	GO:0015918~sterol transport	3	1.0948905109	0.0915964751	6927, 64240, 345	187	37	13528	5.8655875126	1	0.7527850245	79.8408647456
GOTERM_BP_FAT	GO:0030301~cholesterol transport	3	1.0948905109	0.0915964751	6927, 64240, 345	187	37	13528	5.8655875126	1	0.7527850245	79.8408647456
GOTERM_BP_FAT	GO:0060429~epithelium development	7	2.5547445255	0.0934762105	80144, 8174, 56033, 5100, 26585, 2719, 10395	187	227	13528	2.2308181583	1	0.7536969622	80.5251237663
GOTERM_BP_FAT	GO:0051336~regulation of hydrolase activity	9	3.2846715328	0.0943254383	668, 9104, 7070, 124274, 345, 1816, 150209, 10395, 51289	187	337	13528	1.9319887653	1	0.7537964206	80.8270443838
GOTERM_BP_FAT	GO:0007423~sensory organ development	7	2.5547445255	0.0964759847	1409, 668, 25806, 388585, 7070, 1289, 7043	187	229	13528	2.2113350302	1	0.7588125481	81.5720545654
GOTERM_MF_FAT	GO:0030020~extracellular matrix structural constituent conferring tensile strength	2	0.7299270073	0.0795076632	1298, 1299	179	6	12983	24.1769087523	1	0.7740166113	68.196290168
