# Supplementary material for: A systems-level approach to parental genomic imprinting: the imprinted gene network includes extracellular matrix genes and regulates cell cycle exit and differentiation
Source: HighWire-hosted journal article supplement (doi:10.1101/gr.175919.114), 2015-01-22
Supplement: Table_S15.xlsx [file Table_S15.xlsx]

## Sheet: Feuil1
	P<Q>CE		P>Q<CE
	Fold enrichment	p-value	Fold enrichment	p-value
Imprinted genes	4.0	2.5 10-5	1.2	0.22
IGN members	3.5	1.0 10-18	0.5	0.01
