# Supplementary material for: A systems-level approach to parental genomic imprinting: the imprinted gene network includes extracellular matrix genes and regulates cell cycle exit and differentiation
Source: HighWire-hosted journal article supplement (doi:10.1101/gr.175919.114), 2015-01-22
Supplement: Table_S16.xlsx [file Table_S16.xlsx]

## Sheet: P<Q>CE
Category	Term	Count	%	PValue	GeneIDs	Symbols	List Total	Pop Hits	Pop Total	Fold Enrichment	Bonferroni	Benjamini	FDR
GOTERM_BP_FAT	GO:0022610~biological adhesion	52	7.7266	1.01031e-11	50706, 373864, 12814, 11877, 12818, 12819, 93714, 245827, 56264, 100689, 69538, 16005, 12125, 329872, 21826, 93880, 93881, 93882, 223272, 117606, 12552, 16775, 70370, 11754, 18189, 16399, 231858, 18074, 15898, 216856, 64817, 93876, 226041, 93878, 17967, 242409, 93874, 381409, 319655, 57810, 13612, 20612, 16414, 16419, 12845, 76293, 81877, 241226, 93709, 192188, 56429, 233651	Postn,Col27a1,Col11a1,Arvcf,Col14a1,Col15a1,Pcdhga6,Fat2,Cpxm1,Spon2,Antxr1,Igfals,Bcl2l11,Frem1,Thbs2,Pcdhb9,Pcdhb10,Pcdhb11,Itgbl1,Boc,Cdh11,Lama4,Fbln7,Aoc3,Nrxn1,Itga2b,Radil,Nid2,Icam5,Nlgn2,Svep1,Pcdhb5,Pgm5,Pcdhb7,Ncam1,Tmem8b,Pcdhb3,Cdh26,Podxl2,Cdon,Edil3,Siglec1,Itgb2,Itgb5,Comp,Mfap4,Tnxb,Itga8,Pcdhga1,Stab2,Dpt,Dchs1	451	319	7876	2.8467	1.75188e-08	1.75188e-08	1.7081e-08
	GO:0007155~cell adhesion	52	7.7266	1.01031e-11	50706, 373864, 12814, 11877, 12818, 12819, 93714, 245827, 56264, 100689, 69538, 16005, 12125, 329872, 21826, 93880, 93881, 93882, 223272, 117606, 12552, 16775, 70370, 11754, 18189, 16399, 231858, 18074, 15898, 216856, 64817, 93876, 226041, 93878, 17967, 242409, 93874, 381409, 319655, 57810, 13612, 20612, 16414, 16419, 12845, 76293, 81877, 241226, 93709, 192188, 56429, 233651	Postn,Col27a1,Col11a1,Arvcf,Col14a1,Col15a1,Pcdhga6,Fat2,Cpxm1,Spon2,Antxr1,Igfals,Bcl2l11,Frem1,Thbs2,Pcdhb9,Pcdhb10,Pcdhb11,Itgbl1,Boc,Cdh11,Lama4,Fbln7,Aoc3,Nrxn1,Itga2b,Radil,Nid2,Icam5,Nlgn2,Svep1,Pcdhb5,Pgm5,Pcdhb7,Ncam1,Tmem8b,Pcdhb3,Cdh26,Podxl2,Cdon,Edil3,Siglec1,Itgb2,Itgb5,Comp,Mfap4,Tnxb,Itga8,Pcdhga1,Stab2,Dpt,Dchs1	451	319	7876	2.8467	1.75188e-08	1.75188e-08	1.7081e-08
	GO:0007166~cell surface receptor linked signal transduction	71	10.5498	8.06949e-10	53627, 73389, 14173, 11480, 16998, 110751, 18709, 14788, 11488, 239405, 216795, 244238, 22420, 229357, 56811, 238252, 14184, 56338, 14205, 57257, 252837, 18212, 13848, 78134, 212398, 13845, 100129, 223272, 117606, 16000, 13649, 80904, 242939, 11551, 21809, 21390, 21886, 12496, 14760, 16399, 18595, 242050, 207521, 19220, 57265, 58182, 12700, 211577, 17967, 72780, 57810, 14366, 67792, 228357, 16414…	Porcn,Hbp1,Fgf2,Acvr2a,Ltbp3,Adam33,Pik3r2,Gpr162,Adam11,Rspo2,Wnt9a,Mrgpre,Wnt6,Gpr149,Dkk2,Gpr135,Fgfr3,Txnip,Figf,Vav3,Ccrl1,Ntrk2,Ephb6,Lpar4,Frat2,Ephb3,Gpr153,Itgbl1,Boc,Igf1,Egfr,Dtx3,Cpz,Adra2a,Tgfb3,Tbxa2r,Tle2,Entpd2,Gpr19,Itga2b,Pdgfra,Igsf10,Dtx4,Ptgfr,Fzd2,Prokr1,Cish,Mrgprf,Ncam1,Rspo3,Cdon,Fzd4,Rgs8,Lrp4,Itgb2,Itgb5,Ramp2,Fgfrl1,Angptl1,Itga8,Angpt2,Ltbp1,Gng7,Rgs3,Dgka,Rgs16,Mib2,…	451	580	7876	2.13776	1.39925e-06	6.99624e-07	1.36428e-06
	GO:0043062~extracellular structure organization	21	3.12036	9.49721e-07	50706, 64074, 228357, 11804, 67896, 12825, 16948, 53614, 12814, 18189, 18595, 14114, 81877, 17920, 17880, 241226, 216856, 320712, 407800, 13717, 56429	Postn,Smoc2,Lrp4,Aplp2,Ccdc80,Col3a1,Lox,Reck,Col11a1,Nrxn1,Pdgfra,Fbln1,Tnxb,Myo6,Myh11,Itga8,Nlgn2,Abi3bp,Ecm2,Eln,Dpt	451	102	7876	3.59541	0.00164546	0.00041162	0.00160565
	GO:0001501~skeletal system development	30	4.45765	8.79913e-07	14991, 11694, 15212, 19242, 15211, 12814, 21809, 11480, 433938, 16998, 18595, 216795, 242050, 17387, 20471, 12842, 15932, 14184, 83453, 21922, 116701, 15437, 15438, 20661, 15434, 15436, 16002, 107587, 17390, 16000	H2-M3,Alx3,Hexb,Ptn,Hexa,Col11a1,Tgfb3,Acvr2a,Mn1,Ltbp3,Pdgfra,Wnt9a,Igsf10,Mmp14,Six1,Col1a1,Idua,Fgfr3,Chrdl1,Clec3b,Fgfrl1,Hoxd8,Hoxd9,Sort1,Hoxd3,Hoxd4,Igf2,Osr2,Mmp2,Igf1	451	189	7876	2.77197	0.00152461	0.000508461	0.00148763
	GO:0030198~extracellular matrix organization	17	2.526	2.08916e-06	50706, 64074, 11804, 12825, 67896, 16948, 12814, 53614, 18595, 14114, 81877, 17880, 241226, 320712, 407800, 13717, 56429	Postn,Smoc2,Aplp2,Col3a1,Ccdc80,Lox,Col11a1,Reck,Pdgfra,Fbln1,Tnxb,Myh11,Itga8,Abi3bp,Ecm2,Eln,Dpt	451	72	7876	4.12331	0.00361605	0.000724258	0.003532
	GO:0007610~behavior	29	4.30906	2.77996e-06	15212, 19242, 15211, 14667, 50873, 228139, 20305, 17920, 20346, 20203, 18606, 98660, 11522, 11804, 56461, 16414, 20520, 16531, 227120, 20350, 15438, 319924, 241226, 18212, 20292, 14708, 16170, 14387, 11609	Hexb,Ptn,Hexa,Gm2a,Park2,P2rx3,Ccl6,Myo6,Sema3a,S100b,Enpp2,Atp1a2,Adh1,Aplp2,Kcnip3,Itgb2,Slc22a5,Kcnma1,Plcl1,Sema3f,Hoxd9,Apba1,Itga8,Ntrk2,Ccl11,Gng7,Il16,Gaa,Agtr2	451	189	7876	2.67957	0.00480886	0.000803087	0.00469987
	GO:0007186~G-protein coupled receptor protein signaling pathway	26	3.8633	7.10157e-06	11551, 21390, 12496, 14760, 14788, 244238, 19220, 58182, 57265, 12700, 211577, 229357, 14366, 238252, 67792, 54409, 252837, 78134, 14708, 50780, 13139, 19734, 11609, 100129, 14362, 114229	Adra2a,Tbxa2r,Entpd2,Gpr19,Gpr162,Mrgpre,Ptgfr,Prokr1,Fzd2,Cish,Mrgprf,Gpr149,Fzd4,Gpr135,Rgs8,Ramp2,Ccrl1,Lpar4,Gng7,Rgs3,Dgka,Rgs16,Agtr2,Gpr153,Fzd1,Kiss1r	451	166	7876	2.73523	0.0122387	0.00175762	0.0120057
	GO:0007626~locomotory behavior	19	2.82318	4.4877e-05	15212, 11804, 15211, 16414, 50873, 20520, 16531, 20350, 15438, 20305, 319924, 17920, 20346, 20292, 14708, 16170, 14387, 18606, 98660	Hexb,Aplp2,Hexa,Itgb2,Park2,Slc22a5,Kcnma1,Sema3f,Hoxd9,Ccl6,Apba1,Myo6,Sema3a,Ccl11,Gng7,Il16,Gaa,Enpp2,Atp1a2	451	110	7876	3.01641	0.0748677	0.00860923	0.0758448
	GO:0006958~complement activation, classical pathway	7	1.04012	4.09275e-05	12268, 12266, 50909, 50908, 69379, 317677, 12263, 667277	C4b,C3,C1ra,C1s,C8g,Gm5077,C2,C1rb	451	13	7876	9.40338	0.0685099	0.00883198	0.069172
	GO:0016337~cell-cell adhesion	20	2.97177	5.6071e-05	381409, 245827, 57810, 16414, 12814, 11877, 15898, 81877, 93880, 93709, 93714, 93881, 93876, 93882, 93878, 233651, 117606, 12552, 17967, 93874	Cdh26,Fat2,Cdon,Itgb2,Col11a1,Arvcf,Icam5,Tnxb,Pcdhb9,Pcdhga1,Pcdhga6,Pcdhb10,Pcdhb5,Pcdhb11,Pcdhb7,Dchs1,Boc,Cdh11,Ncam1,Pcdhb3	451	122	7876	2.86285	0.0926526	0.00967587	0.0947549
	GO:0051605~protein maturation by peptide bond cleavage	10	1.48588	6.74096e-05	12268, 12266, 50909, 50908, 68947, 17387, 12876, 69379, 317677, 12263, 667277	C4b,C3,C1ra,C1s,Chst8,Mmp14,Cpe,C8g,Gm5077,C2,C1rb	451	33	7876	5.29194	0.110319	0.0105703	0.113906
	GO:0002455~humoral immune response mediated by circulating immunoglobulin	7	1.04012	0.000108187	12268, 12266, 50909, 50908, 69379, 317677, 12263, 667277	C4b,C3,C1ra,C1s,C8g,Gm5077,C2,C1rb	451	15	7876	8.14959	0.171059	0.0155123	0.18275
	GO:0002541~activation of plasma proteins involved in acute inflammatory response	7	1.04012	0.000242502	12268, 12266, 50909, 50908, 69379, 317677, 12263, 667277	C4b,C3,C1ra,C1s,C8g,Gm5077,C2,C1rb	451	17	7876	7.19082	0.343314	0.0318323	0.4092
	GO:0006956~complement activation	7	1.04012	0.000242502	12268, 12266, 50909, 50908, 69379, 317677, 12263, 667277	C4b,C3,C1ra,C1s,C8g,Gm5077,C2,C1rb	451	17	7876	7.19082	0.343314	0.0318323	0.4092
	GO:0007156~homophilic cell adhesion	12	1.78306	0.000370338	381409, 245827, 93880, 93709, 93881, 93714, 93876, 93882, 93878, 233651, 12552, 93874	Cdh26,Fat2,Pcdhb9,Pcdhga1,Pcdhb10,Pcdhga6,Pcdhb5,Pcdhb11,Pcdhb7,Dchs1,Cdh11,Pcdhb3	451	58	7876	3.61312	0.473911	0.0419152	0.624276
	GO:0050877~neurological system process	28	4.16048	0.000355834	12296, 19242, 15212, 15211, 14667, 50873, 18189, 218442, 228139, 17920, 216856, 20203, 13400, 13850, 98660, 51795, 13405, 243914, 11804, 56461, 22318, 16531, 319924, 241226, 110595, 14387, 11609, 18438	Cacnb2,Ptn,Hexb,Hexa,Gm2a,Park2,Nrxn1,Serinc5,P2rx3,Myo6,Nlgn2,S100b,Dmpk,Ephx2,Atp1a2,Srpx,Dmd,Lgi4,Aplp2,Kcnip3,Vamp2,Kcnma1,Apba1,Itga8,Timp4,Gaa,Agtr2,P2rx4	451	234	7876	2.08964	0.460508	0.043123	0.599896
GOTERM_CC_FAT	GO:0005576~extracellular region	138	20.5052	6.42142e-40	50706, 16956, 14173, 18542, 373864, 77125, 71791, 110751, 17385, 20305, 16545, 239405, 216795, 320712, 17387, 78558, 13717, 99543, 100689, 18491, 16005, 14205, 72014, 12654, 66705, 17160, 233332, 18295, 17022, 329872, 21826, 18830, 13848, 242608, 57875, 66208, 70564, 16002, 330657, 17390, 223272, 17392, 16000, 70370, 64074, 242939, 74577, 17150, 21809, 18208, 72043, 18074, 14735, 12876, 64817, 12…	Postn,Lpl,Fgf2,Pcolce,Col27a1,Il33,Cpa4,Adam33,Mmp11,Ccl6,Kera,Rspo2,Wnt9a,Abi3bp,Mmp14,Htra3,Eln,Olfml3,Spon2,Pappa,Igfals,Figf,Btbd17,Chi3l1,Dnase1l2,Man2b2,Adamts17,Ogn,Lum,Frem1,Thbs2,Pltp,Ephb6,Podn,Angptl4,Nenf,5730469M10Rik,Igf2,Prss53,Mmp2,Itgbl1,Mmp3,Igf1,Fbln7,Smoc2,Cpz,Glb1l,Mfap2,Tgfb3,Ntn1,Sulf2,Nid2,Gpc4,Cpe,Svep1,Cp,Megf6,Pdgfrl,Edil3,Clec11a,Dcn,Olfm2,Lox,Adipoq,Sema3f,Tnxb,Ltbp1,…	462	630	6890	3.26675	1.95211e-37	1.95211e-37	8.59828e-37
	GO:0044421~extracellular region part	79	11.7385	1.9753e-24	50706, 16956, 14173, 19242, 373864, 12814, 16998, 12818, 77125, 12819, 17385, 110751, 16545, 20305, 20855, 216795, 320712, 17387, 239188, 22420, 20348, 13717, 12268, 56264, 12266, 100689, 16005, 14205, 108153, 50530, 12654, 12825, 21922, 18295, 17022, 329872, 110595, 242608, 57875, 66208, 16170, 16002, 17390, 17392, 16000, 70370, 16775, 64074, 242939, 17150, 21809, 18208, 12496, 72043, 18074, 141…	Postn,Lpl,Fgf2,Ptn,Col27a1,Col11a1,Ltbp3,Col14a1,Il33,Col15a1,Mmp11,Adam33,Kera,Ccl6,Stc1,Wnt9a,Abi3bp,Mmp14,Enox1,Wnt6,Sema3c,Eln,C4b,Cpxm1,C3,Spon2,Igfals,Figf,Adamts7,Mfap5,Chi3l1,Col3a1,Clec3b,Ogn,Lum,Frem1,Timp4,Podn,Angptl4,Nenf,Il16,Igf2,Mmp2,Mmp3,Igf1,Fbln7,Lama4,Smoc2,Cpz,Mfap2,Tgfb3,Ntn1,Entpd2,Sulf2,Nid2,Fbln1,Gpc4,Ecm2,Flt3l,Cp,Col1a2,Fmod,Aspn,Col1a1,Apobr,Dcn,Ccdc80,Lox,Timp2,Adipoq…	462	331	6890	3.5594	6.0049e-22	3.00245e-22	2.64492e-21
	GO:0005578~proteinaceous extracellular matrix	54	8.02377	9.20546e-23	50706, 19242, 373864, 12814, 16998, 12818, 12819, 17385, 110751, 16545, 216795, 320712, 17387, 22420, 13717, 100689, 108153, 50530, 12825, 21922, 18295, 17022, 329872, 242608, 110595, 57875, 17390, 17392, 16775, 70370, 64074, 242939, 17150, 18208, 12496, 18074, 14114, 14735, 407800, 12843, 66695, 14264, 12842, 13179, 67896, 16948, 21858, 12845, 76293, 81877, 17181, 268977, 116847, 56429	Postn,Ptn,Col27a1,Col11a1,Ltbp3,Col14a1,Col15a1,Mmp11,Adam33,Kera,Wnt9a,Abi3bp,Mmp14,Wnt6,Eln,Spon2,Adamts7,Mfap5,Col3a1,Clec3b,Ogn,Lum,Frem1,Podn,Timp4,Angptl4,Mmp2,Mmp3,Lama4,Fbln7,Smoc2,Cpz,Mfap2,Ntn1,Entpd2,Nid2,Fbln1,Gpc4,Ecm2,Col1a2,Aspn,Fmod,Col1a1,Dcn,Ccdc80,Lox,Timp2,Comp,Mfap4,Tnxb,Matn2,Ltbp1,Prelp,Dpt	462	170	6890	4.7372	2.79846e-20	6.99615e-21	1.23261e-19
	GO:0031012~extracellular matrix	55	8.17236	8.30095e-23	50706, 19242, 373864, 12814, 16998, 12818, 12819, 17385, 110751, 16545, 216795, 320712, 17387, 22420, 13717, 100689, 108153, 50530, 12825, 21922, 18295, 17022, 329872, 242608, 110595, 57875, 17390, 17392, 16775, 70370, 64074, 242939, 17150, 21809, 18208, 12496, 18074, 14114, 14735, 407800, 12843, 66695, 14264, 12842, 13179, 67896, 16948, 21858, 12845, 76293, 81877, 17181, 268977, 116847, 56429	Postn,Ptn,Col27a1,Col11a1,Ltbp3,Col14a1,Col15a1,Mmp11,Adam33,Kera,Wnt9a,Abi3bp,Mmp14,Wnt6,Eln,Spon2,Adamts7,Mfap5,Col3a1,Clec3b,Ogn,Lum,Frem1,Podn,Timp4,Angptl4,Mmp2,Mmp3,Lama4,Fbln7,Smoc2,Cpz,Mfap2,Tgfb3,Ntn1,Entpd2,Nid2,Fbln1,Gpc4,Ecm2,Col1a2,Aspn,Fmod,Col1a1,Dcn,Ccdc80,Lox,Timp2,Comp,Mfap4,Tnxb,Matn2,Ltbp1,Prelp,Dpt	462	176	6890	4.66044	2.52349e-20	8.41163e-21	1.1115e-19
	GO:0031224~intrinsic to membrane	222	32.9866	8.47787e-09	108089, 14991, 68859, 11480, 68852, 81840, 109246, 110751, 14788, 11488, 14470, 170756, 93714, 217219, 17387, 64294, 17289, 15216, 225845, 69538, 14184, 68867, 17294, 18212, 13848, 71584, 72759, 235527, 13845, 16004, 23934, 94284, 394435, 11754, 14760, 320398, 107375, 381629, 68428, 19220, 211577, 65079, 244058, 98660, 12870, 14089, 14366, 214895, 56375, 20357, 53614, 20353, 116701, 217258, 74048…	Rnf144a,H2-M3,1190007F08Rik,Acvr2a,Lrrn4cl,Sorcs2,Tspan9,Adam33,Gpr162,Adam11,Rabac1,Slc24a6,Pcdhga6,Fam171a2,Mmp14,Itm2c,Mertk,Hfe,Pla2g16,Antxr1,Fgfr3,Rnf122,Mest,Ntrk2,Ephb6,Gdpd2,Tmem135,Plscr4,Ephb3,Igf2r,Ly6h,Ugt1a6a,Ugt1a6b,Aoc3,Gpr19,Lrig3,Slc25a45,0610007C21Rik,Steap3,Ptgfr,Mrgprf,Rtn4r,Rgma,Atp1a2,Cp,Fap,Fzd4,Lman2l,B4galt4,Sema5b,Reck,Sema4c,Fgfrl1,Abca8a,4632428N05Rik,Sort1,Pear1,Itga…	462	2444	6890	1.35466	2.57727e-06	5.15455e-07	1.13519e-05
	GO:0016021~integral to membrane	211	31.3522	5.35505e-08	108089, 14991, 68859, 11480, 68852, 81840, 109246, 110751, 14788, 11488, 14470, 170756, 93714, 217219, 17387, 64294, 15216, 17289, 225845, 69538, 14184, 68867, 17294, 18212, 13848, 71584, 72759, 235527, 13845, 16004, 94284, 394435, 11754, 14760, 320398, 107375, 381629, 68428, 19220, 211577, 98660, 14089, 14366, 214895, 56375, 20357, 20353, 116701, 217258, 74048, 20661, 73182, 241226, 93709, 53418…	Rnf144a,H2-M3,1190007F08Rik,Acvr2a,Lrrn4cl,Sorcs2,Tspan9,Adam33,Gpr162,Adam11,Rabac1,Slc24a6,Pcdhga6,Fam171a2,Mmp14,Itm2c,Hfe,Mertk,Pla2g16,Antxr1,Fgfr3,Rnf122,Mest,Ntrk2,Ephb6,Gdpd2,Tmem135,Plscr4,Ephb3,Igf2r,Ugt1a6a,Ugt1a6b,Aoc3,Gpr19,Lrig3,Slc25a45,0610007C21Rik,Steap3,Ptgfr,Mrgprf,Atp1a2,Fap,Fzd4,Lman2l,B4galt4,Sema5b,Sema4c,Fgfrl1,Abca8a,4632428N05Rik,Sort1,Pear1,Itga8,Pcdhga1,B4galt2,Gm1282…	462	2336	6890	1.34706	1.62792e-05	2.32562e-06	7.17041e-05
	GO:0044420~extracellular matrix part	19	2.82318	4.62463e-08	12843, 16775, 12842, 64074, 50530, 67896, 12825, 17150, 16948, 373864, 21858, 12814, 18208, 12496, 12819, 329872, 18074, 14114, 81877	Col1a2,Lama4,Col1a1,Smoc2,Mfap5,Ccdc80,Col3a1,Mfap2,Lox,Col27a1,Timp2,Col11a1,Ntn1,Entpd2,Col15a1,Frem1,Nid2,Fbln1,Tnxb	462	61	6890	4.64516	1.40588e-05	2.34314e-06	6.19239e-05
	GO:0005615~extracellular space	31	4.60624	3.11624e-06	16956, 14173, 21809, 77125, 72043, 20305, 20855, 14735, 239188, 20348, 14256, 12870, 12268, 56264, 12266, 171504, 16005, 14205, 12654, 16948, 21922, 11450, 81877, 72713, 57875, 20292, 66208, 16002, 16170, 17390, 16000	Lpl,Fgf2,Tgfb3,Il33,Sulf2,Ccl6,Stc1,Gpc4,Enox1,Sema3c,Flt3l,Cp,C4b,Cpxm1,C3,Apobr,Igfals,Figf,Chi3l1,Lox,Clec3b,Adipoq,Tnxb,Angptl1,Angptl4,Ccl11,Nenf,Igf2,Il16,Mmp2,Igf1	462	182	6890	2.5402	0.000946891	0.00011841	0.00417257
	GO:0005886~plasma membrane	129	19.1679	1.21762e-05	12291, 14991, 16956, 94190, 12296, 11877, 11671, 14788, 14470, 170756, 244238, 93714, 17387, 15216, 67623, 20502, 53945, 229357, 69538, 14184, 57257, 64933, 14579, 26457, 22318, 67839, 16531, 217371, 18212, 13848, 78134, 209039, 71584, 13845, 17390, 23934, 223272, 94284, 394435, 11551, 21809, 21390, 11858, 11754, 50873, 14760, 18595, 17920, 15898, 14735, 381629, 12877, 68428, 19220, 58182, 226041…	Cacna1g,H2-M3,Lpl,Ophn1,Cacnb2,Arvcf,Aldh3a2,Gpr162,Rabac1,Slc24a6,Mrgpre,Pcdhga6,Mmp14,Hfe,Tm7sf3,Slc16a2,Slc40a1,Gpr149,Antxr1,Fgfr3,Vav3,Ap3m2,Gem,Slc27a1,Vamp2,Gpsm1,Kcnma1,Rab40b,Ntrk2,Ephb6,Lpar4,Tenc1,Gdpd2,Ephb3,Mmp2,Ly6h,Itgbl1,Ugt1a6a,Ugt1a6b,Adra2a,Tgfb3,Tbxa2r,Rnd2,Aoc3,Park2,Gpr19,Pdgfra,Myo6,Icam5,Gpc4,0610007C21Rik,Cpeb1,Steap3,Ptgfr,Prokr1,Pgm5,Cish,Rtn4r,Mrgprf,Rgma,Atp1a2,Tmem8b…	462	1364	6890	1.41043	0.00369473	0.000411202	0.0163027
	GO:0005581~collagen	7	1.04012	0.000164217	12843, 81877, 12842, 12825, 373864, 16948, 12814	Col1a2,Tnxb,Col1a1,Col3a1,Col27a1,Lox,Col11a1	462	14	6890	7.45671	0.0487003	0.00498017	0.219663
	GO:0005583~fibrillar collagen	5	0.742942	0.000266316	12843, 81877, 12842, 12825, 373864	Col1a2,Tnxb,Col1a1,Col3a1,Col27a1	462	6	6890	12.4278	0.0777795	0.00733397	0.35601
	GO:0009986~cell surface	21	3.12036	0.000724286	17534, 14991, 57810, 108153, 16414, 21858, 11754, 16531, 16399, 72043, 20661, 18212, 14735, 17387, 237759, 192188, 14256, 117606, 17967, 244058, 114229	Mrc2,H2-M3,Cdon,Adamts7,Itgb2,Timp2,Aoc3,Kcnma1,Itga2b,Sulf2,Sort1,Ntrk2,Gpc4,Mmp14,Col23a1,Stab2,Flt3l,Boc,Ncam1,Rgma,Kiss1r	462	137	6890	2.286	0.197692	0.0181878	0.96548
GOTERM_MF_FAT	GO:0005509~calcium ion binding	72	10.6984	3.51844e-16	12291, 14231, 12296, 67860, 16998, 667277, 17385, 170756, 93714, 17387, 20203, 227632, 245827, 100689, 69441, 21922, 317677, 16531, 66972, 329872, 21826, 93880, 93881, 52377, 11474, 235527, 93882, 268958, 17390, 17392, 12552, 70370, 17534, 64074, 56843, 230815, 18189, 11754, 212670, 12496, 72043, 16399, 18074, 14114, 270084, 494448, 93876, 64817, 93878, 64177, 93874, 13405, 381409, 230971, 50909,…	Cacna1g,Fkbp7,Cacnb2,S100a16,Ltbp3,C1rb,Mmp11,Slc24a6,Pcdhga6,Mmp14,S100b,Kcnt1,Fat2,Spon2,1700023F06Rik,Clec3b,Gm5077,Kcnma1,Slc25a23,Frem1,Thbs2,Pcdhb9,Pcdhb10,Rcn3,Actn3,Plscr4,Pcdhb11,Capn11,Mmp2,Mmp3,Cdh11,Fbln7,Mrc2,Smoc2,Trpm5,Man1c1,Nrxn1,Aoc3,Catsper2,Entpd2,Sulf2,Itga2b,Nid2,Fbln1,Lpcat2,Cbx6,Pcdhb5,Svep1,Pcdhb7,Trpv6,Pcdhb3,Dmd,Cdh26,Megf6,C1ra,C1s,Lrp4,Edil3,Kcnip3,Comp,Plcl1,Susd1,Mf…	426	452	7609	2.8452	1.91847e-13	1.91847e-13	4.88498e-13
	GO:0030246~carbohydrate binding	29	4.30906	6.19718e-09	50706, 70370, 16956, 17534, 64074, 14173, 19242, 16855, 239405, 320712, 407800, 56072, 18606, 17967, 72780, 214895, 20612, 20256, 13179, 67896, 21922, 17160, 12845, 329872, 81877, 21826, 70445, 16004, 192188	Postn,Fbln7,Lpl,Mrc2,Smoc2,Fgf2,Ptn,Lgals4,Rspo2,Abi3bp,Ecm2,Lgals12,Enpp2,Ncam1,Rspo3,Lman2l,Siglec1,Clec11a,Dcn,Ccdc80,Clec3b,Man2b2,Comp,Frem1,Tnxb,Thbs2,Cd248,Igf2r,Stab2	426	146	7609	3.54783	3.56957e-06	1.78479e-06	9.10163e-06
	GO:0005539~glycosaminoglycan binding	17	2.526	1.71757e-07	72780, 50706, 70370, 16956, 64074, 19242, 14173, 13179, 67896, 12845, 81877, 21826, 239405, 320712, 407800, 192188, 17967	Rspo3,Postn,Fbln7,Lpl,Smoc2,Ptn,Fgf2,Dcn,Ccdc80,Comp,Tnxb,Thbs2,Rspo2,Abi3bp,Ecm2,Stab2,Ncam1	426	62	7609	4.89751	9.8927e-05	2.47327e-05	0.000252254
	GO:0030247~polysaccharide binding	18	2.67459	1.47247e-07	50706, 72780, 70370, 16956, 64074, 19242, 14173, 13179, 67896, 12845, 81877, 21826, 239405, 320712, 407800, 192188, 18606, 17967	Postn,Rspo3,Fbln7,Lpl,Smoc2,Ptn,Fgf2,Dcn,Ccdc80,Comp,Tnxb,Thbs2,Rspo2,Abi3bp,Ecm2,Stab2,Enpp2,Ncam1	426	69	7609	4.65952	8.48105e-05	2.8271e-05	0.000216257
	GO:0001871~pattern binding	18	2.67459	1.47247e-07	50706, 72780, 70370, 16956, 64074, 19242, 14173, 13179, 67896, 12845, 81877, 21826, 239405, 320712, 407800, 192188, 18606, 17967	Postn,Rspo3,Fbln7,Lpl,Smoc2,Ptn,Fgf2,Dcn,Ccdc80,Comp,Tnxb,Thbs2,Rspo2,Abi3bp,Ecm2,Stab2,Enpp2,Ncam1	426	69	7609	4.65952	8.48105e-05	2.8271e-05	0.000216257
	GO:0008201~heparin binding	15	2.22883	2.59156e-07	72780, 50706, 70370, 16956, 64074, 19242, 14173, 67896, 12845, 81877, 21826, 239405, 320712, 407800, 17967	Rspo3,Postn,Fbln7,Lpl,Smoc2,Ptn,Fgf2,Ccdc80,Comp,Tnxb,Thbs2,Rspo2,Abi3bp,Ecm2,Ncam1	426	49	7609	5.46781	0.000149262	2.98543e-05	0.000380614
	GO:0019838~growth factor binding	14	2.08024	5.80095e-06	12843, 12842, 16005, 14184, 12825, 11480, 16998, 116701, 18595, 18212, 268977, 78558, 16004, 16157	Col1a2,Col1a1,Igfals,Fgfr3,Col3a1,Acvr2a,Ltbp3,Fgfrl1,Pdgfra,Ntrk2,Ltbp1,Htra3,Igf2r,Il11ra1	426	54	7609	4.63076	0.00333578	0.000556738	0.00851936
	GO:0008237~metallopeptidase activity	20	2.97177	1.52986e-05	56264, 18491, 108153, 242939, 319446, 170745, 233332, 280668, 71791, 17385, 110751, 54381, 108657, 11488, 18675, 17387, 12876, 17390, 16790, 17392	Cpxm1,Pappa,Adamts7,Cpz,Dpep2,Xpnpep2,Adamts17,Adam1a,Cpa4,Mmp11,Adam33,Pgcp,Rnpepl1,Adam11,Phex,Mmp14,Cpe,Mmp2,Anpep,Mmp3	426	114	7609	3.1336	0.00877335	0.00125807	0.0224663
	GO:0004175~endopeptidase activity	25	3.71471	8.23346e-05	26944, 64138, 667277, 280668, 110751, 17385, 11488, 18675, 17387, 78558, 226041, 229445, 14089, 50909, 50908, 18491, 108153, 16913, 317677, 233332, 330657, 56464, 12263, 17390, 268958, 17392	Tinag,Ctsz,C1rb,Adam1a,Adam33,Mmp11,Adam11,Phex,Mmp14,Htra3,Pgm5,Ctso,Fap,C1ra,C1s,Pappa,Adamts7,Psmb8,Gm5077,Adamts17,Prss53,Ctsf,C2,Mmp2,Capn11,Mmp3	426	184	7609	2.42683	0.0463196	0.0059108	0.120854
	GO:0070011~peptidase activity, acting on L-amino acid peptides	35	5.20059	0.000101251	26944, 242939, 319446, 170745, 64138, 667277, 280668, 71791, 17385, 110751, 108657, 11488, 17387, 18675, 78558, 12876, 226041, 16790, 229445, 14089, 56264, 50909, 50908, 18491, 108153, 16913, 317677, 233332, 54381, 330657, 56464, 216825, 268958, 17390, 12263, 17392	Tinag,Cpz,Dpep2,Xpnpep2,Ctsz,C1rb,Adam1a,Cpa4,Mmp11,Adam33,Rnpepl1,Adam11,Mmp14,Phex,Htra3,Cpe,Pgm5,Anpep,Ctso,Fap,Cpxm1,C1ra,C1s,Pappa,Adamts7,Psmb8,Gm5077,Adamts17,Pgcp,Prss53,Ctsf,Usp22,Capn11,Mmp2,C2,Mmp3	426	309	7609	2.02315	0.0566554	0.00645946	0.148602
	GO:0008233~peptidase activity	35	5.20059	0.000242119	26944, 242939, 319446, 170745, 64138, 667277, 280668, 71791, 17385, 110751, 108657, 11488, 17387, 18675, 78558, 12876, 226041, 16790, 229445, 14089, 56264, 50909, 50908, 18491, 108153, 16913, 317677, 233332, 54381, 330657, 56464, 216825, 268958, 17390, 12263, 17392	Tinag,Cpz,Dpep2,Xpnpep2,Ctsz,C1rb,Adam1a,Cpa4,Mmp11,Adam33,Rnpepl1,Adam11,Mmp14,Phex,Htra3,Cpe,Pgm5,Anpep,Ctso,Fap,Cpxm1,C1ra,C1s,Pappa,Adamts7,Psmb8,Gm5077,Adamts17,Pgcp,Prss53,Ctsf,Usp22,Capn11,Mmp2,C2,Mmp3	426	323	7609	1.93546	0.130187	0.0138509	0.355005
	GO:0005201~extracellular matrix structural constituent	7	1.04012	0.000426305	12843, 12842, 50530, 12825, 373864, 12814, 13717	Col1a2,Col1a1,Mfap5,Col3a1,Col27a1,Col11a1,Eln	426	19	7609	6.58055	0.217768	0.0220802	0.62428
KEGG_PATHWAY	mmu05322: Systemic lupus erythematosus	12	1.78306	1.60265e-06	12268, 50909, 12266, 50908, 97114, 15077, 69379, 317677, 667277, 68024, 11474, 319162, 319164, 12263	C4b,C1ra,C3,C1s,Hist2h3c2-ps,Hist2h3c1,C8g,Gm5077,C1rb,Hist1h2bc,Actn3,Hist3h2a,Hist1h2ac,C2	184	34	3163	6.06714	0.000235562	0.000235562	0.00190713
	mmu04610: Complement and coagulation cascades	9	1.3373	0.000209746	12268, 12266, 50909, 50908, 74145, 14066, 69379, 317677, 12263, 667277	C4b,C3,C1ra,C1s,F13a1,F3,C8g,Gm5077,C2,C1rb	184	30	3163	5.15707	0.0303654	0.0152997	0.249311
	mmu04080: Neuroactive ligand-receptor interaction	10	1.48588	0.00101771	228139, 78134, 19116, 11551, 19220, 21390, 11609, 14600, 114229, 18438	P2rx3,Lpar4,Prlr,Adra2a,Ptgfr,Tbxa2r,Agtr2,Ghr,Kiss1r,P2rx4	184	46	3163	3.737	0.139017	0.0486691	1.20438
	mmu04142: Lysosome	15	2.22883	0.00140007	15932, 15212, 15211, 14667, 64933, 64138, 16889, 27419, 20661, 14387, 17939, 56464, 16004, 11305, 229445	Idua,Hexb,Hexa,Gm2a,Ap3m2,Ctsz,Lipa,Naglu,Sort1,Gaa,Naga,Ctsf,Igf2r,Abca2,Ctso	184	99	3163	2.60458	0.18613	0.0501856	1.65342
	mmu04512: ECM-receptor interaction	11	1.63447	0.00196464	12843, 16775, 21826, 81877, 12842, 241226, 12825, 12814, 16419, 12845, 16399	Col1a2,Lama4,Thbs2,Tnxb,Col1a1,Itga8,Col3a1,Col11a1,Itgb5,Comp,Itga2b	184	60	3163	3.15154	0.251052	0.0561776	2.31303
	mmu04510: Focal adhesion	19	2.82318	0.00404647	12843, 16775, 13649, 12842, 14205, 12825, 57257, 12814, 16419, 12845, 16399, 18709, 18595, 81877, 21826, 241226, 11474, 213435, 16000	Col1a2,Lama4,Egfr,Col1a1,Figf,Col3a1,Vav3,Col11a1,Itgb5,Comp,Itga2b,Pik3r2,Pdgfra,Tnxb,Thbs2,Itga8,Actn3,Mylk3,Igf1	184	159	3163	2.05418	0.449009	0.0945648	4.71048
