# Supplementary material for: A systems-level approach to parental genomic imprinting: the imprinted gene network includes extracellular matrix genes and regulates cell cycle exit and differentiation
Source: HighWire-hosted journal article supplement (doi:10.1101/gr.175919.114), 2015-01-22
Supplement: Table_S17.xlsx [file Table_S17.xlsx]

## Sheet: P>Q<CE
Category	Term	Count	%	PValue	GeneIDs	Symbols	List Total	Pop Hits	Pop Total	Fold Enrichment	Bonferroni	Benjamini	FDR
GOTERM_BP_FAT	GO:0007049~cell cycle	110	19.6429	3.99156e-35	12190, 26909, 17216, 72415, 17215, 27401, 67629, 108961, 17219, 217653, 66578, 50927, 15201, 67203, 225182, 320209, 68298, 68014, 12795, 78658, 67177, 72568, 233406, 17535, 74107, 108912, 67849, 23834, 67141, 12235, 20937, 14211, 64707, 215387, 27214, 214901, 14087, 18712, 70385, 20878, 16881, 20877, 68275, 240641, 12189, 74041, 219114, 26886, 16580, 17349, 235559, 12571, 19384, 77744, 56150, 193…	Brca2,Exo1,Mcm2,Sgol1,Mcm3,Skp2,Spc24,E2f8,Mcm6,Mis18bp1,2610039C10Rik,Nasp,Hells,Nde1,Rbbp8,Ddx11,Ncapd2,Zwilch,Plk3,Ncapd3,Cdt1,Lin9,Prc1,Mre11a,Cep55,Cdca2,Cdca5,Cdc6,Fbxo5,Bub1,Suv39h1,Smc2,Suv39h2,Ncaph,Dbf4,Chtf18,Fanca,Pim1,Ccdc99,Aurka,Lig1,Aurkb,Rpa1,Kif20b,Brca1,4632434I11Rik,F630043A04Rik,Cenph,Kifc5b,Mlf1,Topbp1,Cdk6,Ran,6720463M24Rik,Mad2l1,Ranbp1,Ncapg2,Mtbp,Rbl1,Uhmk1,Ccna2,Fancd2,…	441	540	7876	3.63803	7.54006e-32	7.54006e-32	6.81702e-32
	GO:0006259~DNA metabolic process	84	15	7.72901e-30	12190, 26909, 235559, 77782, 18971, 18973, 18974, 17688, 17218, 17217, 17216, 237911, 17215, 17219, 327762, 211651, 50927, 72151, 15201, 21877, 12021, 27221, 97165, 66634, 268465, 104806, 18392, 67177, 20133, 21973, 272551, 18538, 237211, 28113, 72568, 20135, 19361, 14219, 19362, 209334, 72107, 15270, 17535, 12649, 14156, 17869, 23834, 69716, 19366, 71988, 17220, 223970, 70024, 12448, 12447, 1086…	Brca2,Exo1,Topbp1,Polq,Pold1,Pole,Pole2,Msh6,Mcm5,Mcm4,Mcm2,Brip1,Mcm3,Mcm6,Dna2,Fancd2,Nasp,Rfc5,Hells,Tk1,Bard1,Chaf1a,Hmgb2,Mcm8,Eme1,Fancm,Orc1,Cdt1,Rrm1,Top2a,Gins2,Pcna,Fancb,Tinf2,Lin9,Rrm2,Rad51,Ctgf,Rad51ap1,Gen1,Dscc1,H2afx,Mre11a,Chek1,Fen1,Myc,Cdc6,Trip13,Rad54l,Esco2,Mcm7,A630055G03Rik,Mcm10,Ccne2,Ccne1,Foxp1,Apex1,Recql4,Dnmt1,Uhrf1,Rad54b,Obfc2a,Cdc45,Dbf4,Gins1,Rad18,Rpa2,Mdc1,Cht…	441	370	7876	4.05457	1.46001e-26	7.30005e-27	1.32e-26
	GO:0006260~DNA replication	49	8.75	3.09967e-27	12190, 77782, 18971, 18973, 18974, 17218, 17217, 17216, 17215, 17219, 327762, 50927, 72151, 21877, 27221, 66634, 18392, 67177, 20133, 272551, 18538, 72568, 20135, 14219, 19361, 72107, 14156, 23834, 17220, 12448, 70024, 223970, 12447, 12544, 69270, 27214, 19891, 214901, 110749, 16881, 12144, 106344, 68275, 12189, 18968, 19076, 19075, 69263, 76843	Brca2,Polq,Pold1,Pole,Pole2,Mcm5,Mcm4,Mcm2,Mcm3,Mcm6,Dna2,Nasp,Rfc5,Tk1,Chaf1a,Mcm8,Orc1,Cdt1,Rrm1,Gins2,Pcna,Lin9,Rrm2,Ctgf,Rad51,Dscc1,Fen1,Cdc6,Mcm7,Ccne2,Mcm10,A630055G03Rik,Ccne1,Cdc45,Gins1,Dbf4,Rpa2,Chtf18,Chaf1b,Lig1,Blm,Rfc4,Rpa1,Brca1,Pola1,Prim2,Prim1,Rfc3,Dtl	441	133	7876	6.57978	5.85528e-24	1.95176e-24	5.2938e-24
	GO:0022402~cell cycle process	75	13.3929	9.0354e-26	16580, 12190, 17349, 26909, 235559, 19384, 77744, 56150, 19385, 76044, 105837, 72415, 27401, 67629, 16589, 12428, 211651, 217653, 66578, 26934, 108907, 15201, 67203, 225182, 68298, 68014, 66197, 66442, 78658, 236539, 20482, 52276, 19361, 15270, 17535, 236930, 12649, 74107, 381318, 108912, 23834, 67849, 69716, 67141, 12235, 68567, 11799, 13874, 22390, 105988, 12444, 12443, 14211, 64707, 12449, 215…	Kifc5b,Brca2,Mlf1,Exo1,Topbp1,Ran,6720463M24Rik,Mad2l1,Ranbp1,Ncapg2,Mtbp,Sgol1,Skp2,Spc24,Uhmk1,Ccna2,Fancd2,Mis18bp1,2610039C10Rik,Racgap1,Nusap1,Hells,Nde1,Rbbp8,Ncapd2,Zwilch,Cks2,Spc25,Ncapd3,Phgdh,Skil,Cdca8,Rad51,H2afx,Mre11a,Ercc6l,Chek1,Cep55,Nsl1,Cdca2,Cdc6,Cdca5,Trip13,Fbxo5,Bub1,Cgref1,Birc5,Ereg,Wee1,Espl1,Ccnd2,Ccnd1,Smc2,Suv39h2,Ccnf,Ncaph,Dbf4,Incenp,Timeless,Fanca,Mns1,Hmga2,Ccdc…	441	339	7876	3.9512	1.70679e-22	4.26697e-23	1.54312e-22
	GO:0022403~cell cycle phase	67	11.9643	1.26784e-24	16580, 12190, 26909, 235559, 19384, 77744, 56150, 19385, 76044, 105837, 72415, 27401, 67629, 12428, 211651, 217653, 66578, 108907, 15201, 67203, 225182, 68298, 68014, 66197, 66442, 78658, 52276, 19361, 15270, 17535, 236930, 12649, 74107, 381318, 108912, 23834, 67849, 69716, 67141, 12235, 11799, 13874, 22390, 105988, 12444, 12443, 14211, 64707, 12449, 215387, 27214, 16319, 21853, 14087, 17427, 153…	Kifc5b,Brca2,Exo1,Topbp1,Ran,6720463M24Rik,Mad2l1,Ranbp1,Ncapg2,Mtbp,Sgol1,Skp2,Spc24,Ccna2,Fancd2,Mis18bp1,2610039C10Rik,Nusap1,Hells,Nde1,Rbbp8,Ncapd2,Zwilch,Cks2,Spc25,Ncapd3,Cdca8,Rad51,H2afx,Mre11a,Ercc6l,Chek1,Cep55,Nsl1,Cdca2,Cdc6,Cdca5,Trip13,Fbxo5,Bub1,Birc5,Ereg,Wee1,Espl1,Ccnd2,Ccnd1,Smc2,Suv39h2,Ccnf,Ncaph,Dbf4,Incenp,Timeless,Fanca,Mns1,Hmga2,Kntc1,Ccdc99,Aurkb,Cyp26b1,Rpa1,Kif20b,Po…	441	284	7876	4.21331	2.39495e-21	4.7899e-22	2.16529e-21
	GO:0000279~M phase	59	10.5357	4.06454e-22	16580, 12190, 26909, 235559, 19384, 77744, 56150, 19385, 76044, 72415, 67629, 12428, 211651, 217653, 66578, 108907, 15201, 67203, 68298, 68014, 66197, 66442, 78658, 52276, 19361, 15270, 17535, 236930, 74107, 381318, 108912, 23834, 69716, 67849, 67141, 12235, 11799, 13874, 22390, 105988, 14211, 64707, 12449, 215387, 16319, 21853, 14087, 17427, 15364, 208628, 70385, 20877, 232174, 68275, 240641, 71…	Kifc5b,Brca2,Exo1,Topbp1,Ran,6720463M24Rik,Mad2l1,Ranbp1,Ncapg2,Sgol1,Spc24,Ccna2,Fancd2,Mis18bp1,2610039C10Rik,Nusap1,Hells,Nde1,Ncapd2,Zwilch,Cks2,Spc25,Ncapd3,Cdca8,Rad51,H2afx,Mre11a,Ercc6l,Cep55,Nsl1,Cdca2,Cdc6,Trip13,Cdca5,Fbxo5,Bub1,Birc5,Ereg,Wee1,Espl1,Smc2,Suv39h2,Ccnf,Ncaph,Incenp,Timeless,Fanca,Mns1,Hmga2,Kntc1,Ccdc99,Aurkb,Cyp26b1,Rpa1,Kif20b,Haus5,F630043A04Rik,Cdk1,Cenph	441	245	7876	4.30084	7.67792e-19	1.27965e-19	6.94166e-19
	GO:0051301~cell division	55	9.82143	9.76099e-18	16580, 12190, 12571, 19384, 77744, 56150, 17218, 76044, 72415, 67629, 12428, 217653, 66578, 26934, 108907, 15201, 67203, 68298, 68014, 66197, 66442, 78658, 52276, 21973, 233406, 236930, 74107, 381318, 108912, 23834, 67849, 67141, 12235, 11799, 12448, 12447, 22390, 12444, 12443, 14211, 12544, 12449, 215387, 16319, 21853, 208628, 70385, 15364, 16881, 20877, 240641, 71909, 219114, 12534, 26886	Kifc5b,Brca2,Cdk6,Ran,6720463M24Rik,Mad2l1,Mcm5,Ncapg2,Sgol1,Spc24,Ccna2,Mis18bp1,2610039C10Rik,Racgap1,Nusap1,Hells,Nde1,Ncapd2,Zwilch,Cks2,Spc25,Ncapd3,Cdca8,Top2a,Prc1,Ercc6l,Cep55,Nsl1,Cdca2,Cdc6,Cdca5,Fbxo5,Bub1,Birc5,Ccne2,Ccne1,Wee1,Ccnd2,Ccnd1,Smc2,Cdc45,Ccnf,Ncaph,Incenp,Timeless,Kntc1,Ccdc99,Hmga2,Lig1,Aurkb,Kif20b,Haus5,F630043A04Rik,Cdk1,Cenph	441	262	7876	3.74911	1.84385e-14	2.63407e-15	1.66704e-14
	GO:0000278~mitotic cell cycle	51	9.10714	2.04671e-17	16580, 19384, 77744, 56150, 76044, 105837, 72415, 27401, 67629, 12428, 217653, 66578, 108907, 15201, 225182, 67203, 68298, 68014, 66442, 78658, 52276, 236930, 12649, 74107, 381318, 108912, 67849, 23834, 67141, 12235, 11799, 22390, 12444, 12443, 14211, 12449, 27214, 215387, 16319, 21853, 208628, 70385, 15364, 20878, 20877, 240641, 18968, 71909, 219114, 12534, 26886	Kifc5b,Ran,6720463M24Rik,Mad2l1,Ncapg2,Mtbp,Sgol1,Skp2,Spc24,Ccna2,Mis18bp1,2610039C10Rik,Nusap1,Hells,Rbbp8,Nde1,Ncapd2,Zwilch,Spc25,Ncapd3,Cdca8,Ercc6l,Chek1,Cep55,Nsl1,Cdca2,Cdca5,Cdc6,Fbxo5,Bub1,Birc5,Wee1,Ccnd2,Ccnd1,Smc2,Ccnf,Dbf4,Ncaph,Incenp,Timeless,Kntc1,Ccdc99,Hmga2,Aurka,Aurkb,Kif20b,Pola1,Haus5,F630043A04Rik,Cdk1,Cenph	441	231	7876	3.94299	3.86624e-14	4.83281e-15	3.4955e-14
	GO:0007067~mitosis	42	7.5	5.26996e-15	16580, 236930, 19384, 74107, 77744, 381318, 56150, 108912, 23834, 67849, 67141, 12235, 76044, 11799, 72415, 22390, 67629, 12428, 14211, 12449, 215387, 217653, 66578, 16319, 21853, 108907, 15201, 67203, 15364, 208628, 70385, 20877, 68298, 68014, 66442, 240641, 78658, 71909, 219114, 52276, 12534, 26886	Kifc5b,Ercc6l,Ran,Cep55,6720463M24Rik,Nsl1,Mad2l1,Cdca2,Cdc6,Cdca5,Fbxo5,Bub1,Ncapg2,Birc5,Sgol1,Wee1,Spc24,Ccna2,Smc2,Ccnf,Ncaph,Mis18bp1,2610039C10Rik,Incenp,Timeless,Nusap1,Hells,Nde1,Hmga2,Kntc1,Ccdc99,Aurkb,Ncapd2,Zwilch,Spc25,Kif20b,Ncapd3,Haus5,F630043A04Rik,Cdca8,Cdk1,Cenph	441	182	7876	4.1214	9.85689e-12	1.09524e-12	8.91509e-12
	GO:0000280~nuclear division	42	7.5	5.26996e-15	16580, 236930, 19384, 74107, 77744, 381318, 56150, 108912, 23834, 67849, 67141, 12235, 76044, 11799, 72415, 22390, 67629, 12428, 14211, 12449, 215387, 217653, 66578, 16319, 21853, 108907, 15201, 67203, 15364, 208628, 70385, 20877, 68298, 68014, 66442, 240641, 78658, 71909, 219114, 52276, 12534, 26886	Kifc5b,Ercc6l,Ran,Cep55,6720463M24Rik,Nsl1,Mad2l1,Cdca2,Cdc6,Cdca5,Fbxo5,Bub1,Ncapg2,Birc5,Sgol1,Wee1,Spc24,Ccna2,Smc2,Ccnf,Ncaph,Mis18bp1,2610039C10Rik,Incenp,Timeless,Nusap1,Hells,Nde1,Hmga2,Kntc1,Ccdc99,Aurkb,Ncapd2,Zwilch,Spc25,Kif20b,Ncapd3,Haus5,F630043A04Rik,Cdca8,Cdk1,Cenph	441	182	7876	4.1214	9.85689e-12	1.09524e-12	8.91509e-12
	GO:0000087~M phase of mitotic cell cycle	42	7.5	1.16519e-14	16580, 236930, 19384, 74107, 77744, 381318, 56150, 108912, 23834, 67849, 67141, 12235, 76044, 11799, 72415, 22390, 67629, 12428, 14211, 12449, 215387, 217653, 66578, 16319, 21853, 108907, 15201, 67203, 15364, 208628, 70385, 20877, 68298, 68014, 66442, 240641, 78658, 71909, 219114, 52276, 12534, 26886	Kifc5b,Ercc6l,Ran,Cep55,6720463M24Rik,Nsl1,Mad2l1,Cdca2,Cdc6,Cdca5,Fbxo5,Bub1,Ncapg2,Birc5,Sgol1,Wee1,Spc24,Ccna2,Smc2,Ccnf,Ncaph,Mis18bp1,2610039C10Rik,Incenp,Timeless,Nusap1,Hells,Nde1,Hmga2,Kntc1,Ccdc99,Aurkb,Ncapd2,Zwilch,Spc25,Kif20b,Ncapd3,Haus5,F630043A04Rik,Cdca8,Cdk1,Cenph	441	186	7876	4.03277	2.20207e-11	2.20202e-12	1.99063e-11
	GO:0048285~organelle fission	42	7.5	2.08112e-14	16580, 236930, 19384, 74107, 77744, 381318, 56150, 108912, 23834, 67849, 67141, 12235, 76044, 11799, 72415, 22390, 67629, 12428, 14211, 12449, 215387, 217653, 66578, 16319, 21853, 108907, 15201, 67203, 15364, 208628, 70385, 20877, 68298, 68014, 66442, 240641, 78658, 71909, 219114, 52276, 12534, 26886	Kifc5b,Ercc6l,Ran,Cep55,6720463M24Rik,Nsl1,Mad2l1,Cdca2,Cdc6,Cdca5,Fbxo5,Bub1,Ncapg2,Birc5,Sgol1,Wee1,Spc24,Ccna2,Smc2,Ccnf,Ncaph,Mis18bp1,2610039C10Rik,Incenp,Timeless,Nusap1,Hells,Nde1,Hmga2,Kntc1,Ccdc99,Aurkb,Ncapd2,Zwilch,Spc25,Kif20b,Ncapd3,Haus5,F630043A04Rik,Cdca8,Cdk1,Cenph	441	189	7876	3.96876	3.92179e-11	3.56526e-12	3.54605e-11
	GO:0006974~response to DNA damage stimulus	49	8.75	5.40387e-13	12190, 26909, 235559, 77782, 18971, 18973, 17688, 237911, 17319, 327762, 211651, 27221, 12021, 97165, 268465, 104806, 18538, 237211, 19361, 209334, 68048, 19362, 15270, 17535, 12649, 14156, 69716, 19366, 71988, 11792, 12443, 237877, 623474, 109019, 18140, 58186, 21853, 240087, 14087, 110749, 16881, 12144, 68275, 12189, 18968, 230484, 269582, 12534, 76843	Brca2,Exo1,Topbp1,Polq,Pold1,Pole,Msh6,Brip1,Mif,Dna2,Fancd2,Chaf1a,Bard1,Hmgb2,Eme1,Fancm,Pcna,Fancb,Rad51,Gen1,Aen,Rad51ap1,H2afx,Mre11a,Chek1,Fen1,Trip13,Rad54l,Esco2,Apex1,Ccnd1,Atad5,Rad54b,Obfc2a,Uhrf1,Rad18,Timeless,Mdc1,Fanca,Chaf1b,Lig1,Blm,Rpa1,Brca1,Pola1,Usp1,Clspn,Cdk1,Dtl	441	273	7876	3.20554	1.02071e-09	8.50594e-11	9.22828e-10
	GO:0006281~DNA repair	42	7.5	1.21117e-12	12190, 19361, 26909, 209334, 19362, 17535, 15270, 235559, 12649, 77782, 14156, 69716, 18971, 19366, 18973, 71988, 17688, 237911, 11792, 211651, 327762, 109019, 18140, 623474, 58186, 240087, 14087, 110749, 16881, 12144, 27221, 12021, 97165, 68275, 268465, 12189, 104806, 18968, 230484, 269582, 237211, 18538	Brca2,Rad51,Exo1,Gen1,Rad51ap1,Mre11a,H2afx,Topbp1,Chek1,Polq,Fen1,Trip13,Pold1,Rad54l,Pole,Esco2,Msh6,Brip1,Apex1,Fancd2,Dna2,Obfc2a,Uhrf1,Rad54b,Rad18,Mdc1,Fanca,Chaf1b,Lig1,Blm,Chaf1a,Bard1,Hmgb2,Rpa1,Eme1,Brca1,Fancm,Pola1,Usp1,Clspn,Fancb,Pcna	441	212	7876	3.53819	2.28785e-09	1.75988e-10	2.06846e-09
	GO:0006261~DNA-dependent DNA replication	17	3.03571	5.98761e-12	19361, 12190, 18971, 18974, 17218, 17220, 17217, 17216, 12448, 18968, 17215, 12447, 19076, 17219, 19075, 327762, 12544	Rad51,Brca2,Pold1,Pole2,Mcm5,Mcm7,Mcm4,Mcm2,Ccne2,Pola1,Mcm3,Ccne1,Prim2,Mcm6,Prim1,Dna2,Cdc45	441	34	7876	8.92971	1.13107e-08	8.07906e-10	1.02261e-08
	GO:0006270~DNA replication initiation	10	1.78571	4.66213e-11	17218, 17217, 17220, 12448, 17216, 12447, 18968, 17215, 17219, 12544	Mcm5,Mcm4,Mcm7,Ccne2,Mcm2,Ccne1,Pola1,Mcm3,Mcm6,Cdc45	441	10	7876	17.8594	8.80678e-08	5.87118e-09	7.96226e-08
	GO:0033554~cellular response to stress	51	9.10714	7.6379e-10	12190, 26909, 235559, 77782, 18971, 18973, 17688, 72692, 237911, 17319, 327762, 211651, 27221, 12021, 97165, 268465, 104806, 18538, 237211, 19361, 68048, 19362, 209334, 15270, 17535, 12649, 14156, 69716, 19366, 71988, 63873, 11792, 12443, 237877, 623474, 109019, 18140, 58186, 21853, 240087, 14087, 110749, 16881, 12144, 68275, 12189, 18968, 230484, 269582, 12534, 76843	Brca2,Exo1,Topbp1,Polq,Pold1,Pole,Msh6,Hnrpll,Brip1,Mif,Dna2,Fancd2,Chaf1a,Bard1,Hmgb2,Eme1,Fancm,Pcna,Fancb,Rad51,Aen,Rad51ap1,Gen1,H2afx,Mre11a,Chek1,Fen1,Trip13,Rad54l,Esco2,Trpv4,Apex1,Ccnd1,Atad5,Rad54b,Obfc2a,Uhrf1,Rad18,Timeless,Mdc1,Fanca,Chaf1b,Lig1,Blm,Rpa1,Brca1,Pola1,Usp1,Clspn,Cdk1,Dtl	441	355	7876	2.56572	1.4428e-06	9.01749e-08	1.30444e-06
	GO:0007126~meiosis	18	3.21429	1.16384e-08	12190, 19361, 26909, 14087, 17535, 235559, 15270, 17427, 232174, 69716, 67141, 66197, 68275, 13874, 72415, 105988, 211651, 64707	Brca2,Rad51,Exo1,Fanca,Mre11a,Topbp1,H2afx,Mns1,Cyp26b1,Trip13,Fbxo5,Cks2,Rpa1,Ereg,Sgol1,Espl1,Fancd2,Suv39h2	441	59	7876	5.44863	2.19847e-05	1.29323e-06	1.98767e-05
	GO:0051327~M phase of meiotic cell cycle	18	3.21429	1.16384e-08	12190, 19361, 26909, 14087, 17535, 235559, 15270, 17427, 232174, 69716, 67141, 66197, 68275, 13874, 72415, 105988, 211651, 64707	Brca2,Rad51,Exo1,Fanca,Mre11a,Topbp1,H2afx,Mns1,Cyp26b1,Trip13,Fbxo5,Cks2,Rpa1,Ereg,Sgol1,Espl1,Fancd2,Suv39h2	441	59	7876	5.44863	2.19847e-05	1.29323e-06	1.98767e-05
	GO:0051321~meiotic cell cycle	18	3.21429	2.02895e-08	12190, 19361, 26909, 14087, 17535, 235559, 15270, 17427, 232174, 69716, 67141, 66197, 68275, 13874, 72415, 105988, 211651, 64707	Brca2,Rad51,Exo1,Fanca,Mre11a,Topbp1,H2afx,Mns1,Cyp26b1,Trip13,Fbxo5,Cks2,Rpa1,Ereg,Sgol1,Espl1,Fancd2,Suv39h2	441	61	7876	5.26999	3.83261e-05	2.12926e-06	3.46515e-05
	GO:0051726~regulation of cell cycle	29	5.17857	3.60676e-07	12190, 15270, 11852, 12649, 17869, 19385, 56150, 67141, 105837, 11799, 13874, 12448, 12447, 27401, 12444, 12443, 79456, 109019, 27214, 70799, 57441, 108907, 20873, 68014, 17873, 67177, 16477, 269582, 12534	Brca2,H2afx,Rhob,Chek1,Myc,Ranbp1,Mad2l1,Fbxo5,Mtbp,Birc5,Ereg,Ccne2,Ccne1,Skp2,Ccnd2,Ccnd1,Recql4,Obfc2a,Dbf4,Cep192,Gmnn,Nusap1,Plk4,Zwilch,Gadd45b,Cdt1,Junb,Clspn,Cdk1	441	175	7876	2.95956	0.000681085	3.58581e-05	0.000615981
	GO:0006310~DNA recombination	17	3.03571	4.4082e-07	12190, 19361, 26909, 19362, 235559, 15270, 16881, 69716, 12144, 19366, 68275, 17688, 268465, 108655, 79456, 623474, 109019	Brca2,Rad51,Exo1,Rad51ap1,Topbp1,H2afx,Lig1,Trip13,Blm,Rad54l,Rpa1,Msh6,Eme1,Foxp1,Recql4,Rad54b,Obfc2a	441	66	7876	4.60015	0.000832362	4.16346e-05	0.000752854
	GO:0006275~regulation of DNA replication	8	1.42857	7.04523e-06	15903, 12190, 57441, 13874, 67177, 18538, 269582, 327762	Id3,Brca2,Gmnn,Ereg,Cdt1,Pcna,Clspn,Dna2	441	15	7876	9.52502	0.0132203	0.000633537	0.0120316
	GO:0030261~chromosome condensation	8	1.42857	1.19253e-05	76044, 78658, 108907, 21973, 14211, 68298, 67849, 215387	Ncapg2,Ncapd3,Nusap1,Top2a,Smc2,Ncapd2,Cdca5,Ncaph	441	16	7876	8.92971	0.0222751	0.00102343	0.0203647
	GO:0007059~chromosome segregation	14	2.5	1.64953e-05	16319, 108907, 70385, 381318, 56150, 67849, 66442, 11799, 78658, 72415, 105988, 219114, 21973, 26886	Incenp,Nusap1,Ccdc99,Nsl1,Mad2l1,Cdca5,Spc25,Birc5,Ncapd3,Sgol1,Espl1,F630043A04Rik,Top2a,Cenph	441	59	7876	4.23783	0.0306794	0.00135386	0.0281679
	GO:0051052~regulation of DNA metabolic process	12	2.14286	2.0891e-05	17688, 15903, 12190, 57441, 13874, 230484, 67177, 18538, 269582, 12144, 327762, 58186	Msh6,Id3,Brca2,Gmnn,Ereg,Usp1,Cdt1,Pcna,Clspn,Blm,Dna2,Rad18	441	44	7876	4.87075	0.0386949	0.00164296	0.0356728
	GO:0000725~recombinational repair	7	1.25	3.60229e-05	19361, 12190, 15270, 19366, 623474, 109019, 68275	Rad51,Brca2,H2afx,Rad54l,Rad54b,Obfc2a,Rpa1	441	13	7876	9.61661	0.0657849	0.00271824	0.0615042
	GO:0000724~double-strand break repair via homologous recombination	7	1.25	3.60229e-05	19361, 12190, 15270, 19366, 623474, 109019, 68275	Rad51,Brca2,H2afx,Rad54l,Rad54b,Obfc2a,Rpa1	441	13	7876	9.61661	0.0657849	0.00271824	0.0615042
	GO:0006323~DNA packaging	13	2.32143	5.63909e-05	15270, 108907, 66929, 15201, 67849, 68298, 76044, 78658, 17216, 20937, 21973, 14211, 215387	H2afx,Nusap1,Asf1b,Hells,Cdca5,Ncapd2,Ncapg2,Ncapd3,Mcm2,Suv39h1,Top2a,Smc2,Ncaph	441	57	7876	4.0732	0.101048	0.00408875	0.0962639
	GO:0007346~regulation of mitotic cell cycle	15	2.67857	8.89769e-05	70799, 12190, 108907, 17869, 56150, 19385, 67141, 68014, 11799, 105837, 13874, 67177, 12443, 12534, 27214	Cep192,Brca2,Nusap1,Myc,Mad2l1,Ranbp1,Fbxo5,Zwilch,Birc5,Mtbp,Ereg,Cdt1,Ccnd1,Cdk1,Dbf4	441	78	7876	3.4345	0.154718	0.00620602	0.151851
	GO:0051053~negative regulation of DNA metabolic process	7	1.25	0.000214402	17688, 12190, 57441, 67177, 269582, 12144, 58186	Msh6,Brca2,Gmnn,Cdt1,Clspn,Blm,Rad18	441	17	7876	7.35387	0.333056	0.0143619	0.365538
	GO:0051276~chromosome organization	35	6.25	0.000233167	12190, 15270, 66929, 107823, 382207, 56275, 56150, 67849, 19366, 76044, 72692, 17216, 107435, 19650, 20937, 14211, 13433, 211651, 64707, 215387, 50927, 108907, 15201, 70385, 12144, 68298, 14841, 217578, 68275, 78658, 21973, 14056, 28113, 75339, 26886	Brca2,H2afx,Asf1b,Whsc1,Phf16,Rbm14,Mad2l1,Cdca5,Rad54l,Ncapg2,Hnrpll,Mcm2,Hat1,Rbl1,Suv39h1,Smc2,Dnmt1,Fancd2,Suv39h2,Ncaph,Nasp,Nusap1,Hells,Ccdc99,Blm,Ncapd2,Gsg2,Baz1a,Rpa1,Ncapd3,Top2a,Ezh2,Tinf2,Mphosph8,Cenph	441	322	7876	1.94124	0.356287	0.015075	0.397469
	GO:0010564~regulation of cell cycle process	12	2.14286	0.000260144	12190, 70799, 11799, 13874, 108907, 20873, 67177, 79456, 56150, 19385, 67141, 27214	Brca2,Cep192,Birc5,Ereg,Nusap1,Plk4,Cdt1,Recql4,Mad2l1,Ranbp1,Fbxo5,Dbf4	441	57	7876	3.75988	0.388277	0.0162491	0.443361
	GO:0000075~cell cycle checkpoint	11	1.96429	0.00030673	70799, 11799, 15270, 67177, 12649, 12443, 56150, 269582, 68014, 109019, 12534	Cep192,Birc5,H2afx,Cdt1,Chek1,Ccnd1,Mad2l1,Clspn,Zwilch,Obfc2a,Cdk1	441	49	7876	4.00926	0.439823	0.01852	0.522561
	GO:0001824~blastocyst development	10	1.78571	0.000344674	76044, 12190, 50927, 21679, 217558, 20482, 15200, 225182, 16477, 69270	Ncapg2,Brca2,Nasp,Tead4,G2e3,Skil,Hbegf,Rbbp8,Junb,Gins1	441	41	7876	4.35595	0.478581	0.0201444	0.587025
	GO:0006302~double-strand break repair	10	1.78571	0.00041738	19361, 12190, 17535, 15270, 18968, 69716, 19366, 623474, 109019, 68275	Rad51,Brca2,Mre11a,H2afx,Pola1,Trip13,Rad54l,Rad54b,Obfc2a,Rpa1	441	42	7876	4.25224	0.545517	0.0236136	0.710438
	GO:0051172~negative regulation of nitrogen compound metabolic process	32	5.71429	0.00044982	60406, 12190, 15903, 229700, 13392, 17869, 13390, 21885, 15901, 15902, 17688, 13874, 108655, 107435, 72269, 15460, 19650, 20937, 13433, 58186, 21853, 57441, 20893, 15201, 12389, 12144, 22337, 14629, 20482, 67177, 269582, 22166	Sap30,Brca2,Id3,Rbm15,Dlx2,Myc,Dlx1,Tle1,Id1,Id2,Msh6,Ereg,Foxp1,Hat1,Cda,Hr,Rbl1,Suv39h1,Dnmt1,Rad18,Timeless,Gmnn,Bhlhe40,Hells,Cav1,Blm,Vdr,Gclc,Skil,Cdt1,Clspn,Txn1,	441	294	7876	1.94388	0.572543	0.0246873	0.765457
	GO:0051329~interphase of mitotic cell cycle	10	1.78571	0.000600786	105837, 11799, 18968, 27401, 12444, 225182, 12649, 12443, 67849, 27214	Mtbp,Birc5,Pola1,Skp2,Ccnd2,Rbbp8,Chek1,Ccnd1,Cdca5,Dbf4	441	44	7876	4.05896	0.678651	0.0319147	1.02112
	GO:0046394~carboxylic acid biosynthetic process	15	2.67857	0.000667726	27053, 107476, 20249, 170439, 14104, 12189, 236539, 13361, 12035, 14873, 19225, 107272, 11898, 20250, 14718	Asns,Acaca,Scd1,Elovl6,Fasn,Brca1,Phgdh,Dhfr,Bcat1,Gsto1,Ptgs2,Psat1,Ass1,Scd2,Got1	441	94	7876	2.84991	0.716844	0.0344417	1.13428
	GO:0016053~organic acid biosynthetic process	15	2.67857	0.000667726	27053, 107476, 20249, 170439, 14104, 12189, 236539, 13361, 12035, 14873, 19225, 107272, 11898, 20250, 14718	Asns,Acaca,Scd1,Elovl6,Fasn,Brca1,Phgdh,Dhfr,Bcat1,Gsto1,Ptgs2,Psat1,Ass1,Scd2,Got1	441	94	7876	2.84991	0.716844	0.0344417	1.13428
	GO:0051325~interphase	10	1.78571	0.000714589	105837, 11799, 18968, 27401, 12444, 225182, 12649, 12443, 67849, 27214	Mtbp,Birc5,Pola1,Skp2,Ccnd2,Rbbp8,Chek1,Ccnd1,Cdca5,Dbf4	441	45	7876	3.96876	0.740848	0.0358378	1.21343
	GO:0007127~meiosis I	7	1.25	0.000776431	19361, 235559, 105988, 69716, 67141, 211651, 66197	Rad51,Topbp1,Espl1,Trip13,Fbxo5,Fancd2,Cks2	441	21	7876	5.95314	0.769441	0.0378759	1.31779
	GO:0045934~negative regulation of nucleobase, nucleoside, nucleotide and nucleic acid metabolic process	31	5.53571	0.00080639	60406, 12190, 15903, 229700, 13392, 17869, 13390, 21885, 15901, 15902, 17688, 13874, 108655, 107435, 72269, 15460, 19650, 20937, 13433, 58186, 21853, 57441, 20893, 15201, 12144, 22337, 14629, 20482, 67177, 269582, 22166	Sap30,Brca2,Id3,Rbm15,Dlx2,Myc,Dlx1,Tle1,Id1,Id2,Msh6,Ereg,Foxp1,Hat1,Cda,Hr,Rbl1,Suv39h1,Dnmt1,Rad18,Timeless,Gmnn,Bhlhe40,Hells,Blm,Vdr,Gclc,Skil,Cdt1,Clspn,Txn1	441	291	7876	1.90255	0.782136	0.0383204	1.36831
GOTERM_CC_FAT	GO:0005694~chromosome	64	11.4286	1.28299e-23	235559, 66929, 66570, 19387, 56150, 15354, 17688, 17216, 72415, 67629, 211651, 217653, 66578, 72151, 15201, 67203, 72155, 68298, 68014, 97165, 217578, 66442, 78658, 21917, 52276, 21973, 69928, 71876, 18538, 28113, 60406, 19361, 15270, 236930, 83815, 12649, 381318, 12235, 11799, 20937, 14211, 13433, 60411, 64707, 58186, 16319, 19891, 102920, 15364, 208628, 70385, 20877, 12144, 50887, 106344, 68275…	Topbp1,Asf1b,Cenpm,Rangap1,Mad2l1,Hmgb3,Msh6,Mcm2,Sgol1,Spc24,Fancd2,Mis18bp1,2610039C10Rik,Rfc5,Hells,Nde1,Cenpn,Ncapd2,Zwilch,Hmgb2,Baz1a,Spc25,Ncapd3,Tmpo,Cdca8,Top2a,Apitd1,Mlf1ip,Pcna,Tinf2,Sap30,Rad51,H2afx,Ercc6l,Cenpq,Chek1,Nsl1,Bub1,Birc5,Suv39h1,Smc2,Dnmt1,Cenpk,Suv39h2,Rad18,Incenp,Rpa2,Cenpi,Hmga2,Kntc1,Ccdc99,Aurkb,Blm,Hmgn5,Rfc4,Rpa1,Brca1,Pola1,Prim2,Prim1,F630043A04Rik,Clspn,Mphos…	338	310	6890	4.20844	3.86181e-21	3.86181e-21	1.71534e-20
	GO:0044427~chromosomal part	54	9.64286	4.83077e-20	66929, 66570, 19387, 56150, 17688, 17216, 72415, 67629, 217653, 66578, 72151, 15201, 67203, 72155, 68014, 66442, 78658, 21917, 52276, 69928, 71876, 18538, 28113, 60406, 19361, 15270, 236930, 83815, 12649, 381318, 12235, 11799, 20937, 13433, 60411, 64707, 58186, 16319, 19891, 102920, 208628, 70385, 15364, 20877, 12144, 50887, 106344, 68275, 18968, 19076, 19075, 219114, 75339, 26886	Asf1b,Cenpm,Rangap1,Mad2l1,Msh6,Mcm2,Sgol1,Spc24,Mis18bp1,2610039C10Rik,Rfc5,Hells,Nde1,Cenpn,Zwilch,Spc25,Ncapd3,Tmpo,Cdca8,Apitd1,Mlf1ip,Pcna,Tinf2,Sap30,Rad51,H2afx,Ercc6l,Cenpq,Chek1,Nsl1,Bub1,Birc5,Suv39h1,Dnmt1,Cenpk,Suv39h2,Rad18,Incenp,Rpa2,Cenpi,Kntc1,Ccdc99,Hmga2,Aurkb,Blm,Hmgn5,Rfc4,Rpa1,Pola1,Prim2,Prim1,F630043A04Rik,Mphosph8,Cenph	338	259	6890	4.25007	1.45406e-17	7.27031e-18	6.45865e-17
	GO:0000775~chromosome, centromeric region	31	5.53571	6.38472e-16	236930, 83815, 66570, 19387, 381318, 56150, 12235, 11799, 72415, 67629, 20937, 13433, 60411, 64707, 217653, 66578, 16319, 15201, 102920, 67203, 70385, 72155, 208628, 20877, 68014, 66442, 219114, 52276, 69928, 71876, 26886	Ercc6l,Cenpq,Cenpm,Rangap1,Nsl1,Mad2l1,Bub1,Birc5,Sgol1,Spc24,Suv39h1,Dnmt1,Cenpk,Suv39h2,Mis18bp1,2610039C10Rik,Incenp,Hells,Cenpi,Nde1,Ccdc99,Cenpn,Kntc1,Aurkb,Zwilch,Spc25,F630043A04Rik,Cdca8,Apitd1,Mlf1ip,Cenph	338	104	6890	6.07618	2.00506e-13	6.68354e-14	8.88178e-13
	GO:0000793~condensed chromosome	27	4.82143	1.70212e-13	19361, 235559, 236930, 66570, 19387, 381318, 56150, 12235, 72415, 67629, 211651, 16319, 67203, 70385, 72155, 208628, 68298, 68014, 97165, 66442, 68275, 78658, 12189, 219114, 21973, 71876, 26886	Rad51,Topbp1,Ercc6l,Cenpm,Rangap1,Nsl1,Mad2l1,Bub1,Sgol1,Spc24,Fancd2,Incenp,Nde1,Ccdc99,Cenpn,Kntc1,Ncapd2,Zwilch,Hmgb2,Spc25,Rpa1,Ncapd3,Brca1,F630043A04Rik,Top2a,Mlf1ip,Cenph	338	94	6890	5.85516	5.12294e-11	1.28073e-11	2.27551e-10
	GO:0043232~intracellular non-membrane-bounded organelle	129	23.0357	1.92455e-13	218294, 23790, 66570, 67920, 15354, 26556, 16906, 11733, 17688, 17216, 217558, 72415, 67629, 109242, 217653, 66578, 72151, 15201, 67203, 72155, 320209, 209737, 73689, 68298, 68014, 97165, 217578, 78658, 268465, 223881, 69928, 21973, 18538, 28113, 22145, 233406, 22143, 16663, 74107, 17869, 23834, 67141, 326618, 12235, 20937, 16665, 14211, 13433, 16669, 64707, 18102, 58186, 20873, 70385, 20878, 208…	Cdc14b,Coro1c,Cenpm,Mak16,Hmgb3,Homer1,Lmnb1,Ank1,Msh6,Mcm2,G2e3,Sgol1,Spc24,Kif24,Mis18bp1,2610039C10Rik,Rfc5,Hells,Nde1,Cenpn,Ddx11,Kif15,Bloc1s2,Ncapd2,Zwilch,Hmgb2,Baz1a,Ncapd3,Eme1,Rnd1,Apitd1,Top2a,Pcna,Tinf2,Tuba4a,Prc1,Tuba1b,Krt13,Cep55,Myc,Cdc6,Fbxo5,Tpm4,Bub1,Suv39h1,Krt15,Smc2,Dnmt1,Krt19,Suv39h2,Nme1,Rad18,Plk4,Ccdc99,Aurka,Aurkb,Myo1d,Hmgn5,Diap1,Rpa1,Kif20b,Brca1,Tbl3,Sprr2k,F63004…	338	1448	6890	1.81603	5.79129e-11	1.15826e-11	2.57239e-10
	GO:0043228~non-membrane-bounded organelle	129	23.0357	1.92455e-13	218294, 23790, 66570, 67920, 15354, 26556, 16906, 11733, 17688, 17216, 217558, 72415, 67629, 109242, 217653, 66578, 72151, 15201, 67203, 72155, 320209, 209737, 73689, 68298, 68014, 97165, 217578, 78658, 268465, 223881, 69928, 21973, 18538, 28113, 22145, 233406, 22143, 16663, 74107, 17869, 23834, 67141, 326618, 12235, 20937, 16665, 14211, 13433, 16669, 64707, 18102, 58186, 20873, 70385, 20878, 208…	Cdc14b,Coro1c,Cenpm,Mak16,Hmgb3,Homer1,Lmnb1,Ank1,Msh6,Mcm2,G2e3,Sgol1,Spc24,Kif24,Mis18bp1,2610039C10Rik,Rfc5,Hells,Nde1,Cenpn,Ddx11,Kif15,Bloc1s2,Ncapd2,Zwilch,Hmgb2,Baz1a,Ncapd3,Eme1,Rnd1,Apitd1,Top2a,Pcna,Tinf2,Tuba4a,Prc1,Tuba1b,Krt13,Cep55,Myc,Cdc6,Fbxo5,Tpm4,Bub1,Suv39h1,Krt15,Smc2,Dnmt1,Krt19,Suv39h2,Nme1,Rad18,Plk4,Ccdc99,Aurka,Aurkb,Myo1d,Hmgn5,Diap1,Rpa1,Kif20b,Brca1,Tbl3,Sprr2k,F63004…	338	1448	6890	1.81603	5.79129e-11	1.15826e-11	2.57239e-10
	GO:0000779~condensed chromosome, centromeric region	18	3.21429	1.11062e-09	16319, 236930, 67203, 66570, 70385, 208628, 72155, 19387, 381318, 56150, 68014, 66442, 12235, 72415, 67629, 219114, 71876, 26886	Incenp,Ercc6l,Nde1,Cenpm,Ccdc99,Kntc1,Cenpn,Rangap1,Nsl1,Mad2l1,Zwilch,Spc25,Bub1,Sgol1,Spc24,F630043A04Rik,Mlf1ip,Cenph	338	58	6890	6.32626	3.34295e-07	5.57159e-08	1.48487e-06
	GO:0000777~condensed chromosome kinetochore	17	3.03571	1.56408e-09	16319, 236930, 67203, 66570, 70385, 208628, 72155, 19387, 381318, 56150, 68014, 66442, 12235, 67629, 219114, 71876, 26886	Incenp,Ercc6l,Nde1,Cenpm,Ccdc99,Kntc1,Cenpn,Rangap1,Nsl1,Mad2l1,Zwilch,Spc25,Bub1,Spc24,F630043A04Rik,Mlf1ip,Cenph	338	52	6890	6.6642	4.70787e-07	6.72553e-08	2.09114e-06
	GO:0005657~replication fork	12	2.14286	4.59382e-09	19891, 72151, 15270, 18968, 19076, 12649, 19075, 18538, 13433, 12144, 106344, 68275	Rpa2,Rfc5,H2afx,Pola1,Prim2,Chek1,Prim1,Pcna,Dnmt1,Blm,Rfc4,Rpa1	338	24	6890	10.1923	1.38274e-06	1.72843e-07	6.14185e-06
	GO:0000776~kinetochore	17	3.03571	2.04384e-08	16319, 236930, 67203, 66570, 70385, 208628, 72155, 19387, 381318, 56150, 68014, 66442, 12235, 67629, 219114, 71876, 26886	Incenp,Ercc6l,Nde1,Cenpm,Ccdc99,Kntc1,Cenpn,Rangap1,Nsl1,Mad2l1,Zwilch,Spc25,Bub1,Spc24,F630043A04Rik,Mlf1ip,Cenph	338	61	6890	5.68096	6.15195e-06	6.83552e-07	2.73258e-05
	GO:0000228~nuclear chromosome	20	3.57143	4.31095e-07	60406, 19361, 16319, 19891, 235559, 15270, 15364, 217578, 68275, 12235, 17688, 78658, 17216, 72415, 18968, 19076, 20937, 19075, 64707, 58186	Sap30,Rad51,Incenp,Rpa2,Topbp1,H2afx,Hmga2,Baz1a,Rpa1,Bub1,Msh6,Ncapd3,Mcm2,Sgol1,Pola1,Prim2,Suv39h1,Prim1,Suv39h2,Rad18	338	103	6890	3.95818	0.000129751	1.29759e-05	0.000576364
	GO:0005819~spindle	18	3.21429	5.67586e-06	16319, 16580, 26934, 108907, 67203, 208628, 70385, 209737, 17869, 20878, 20877, 56150, 23834, 67141, 11799, 71909, 219114, 233406	Incenp,Kifc5b,Racgap1,Nusap1,Nde1,Kntc1,Ccdc99,Kif15,Myc,Aurka,Aurkb,Mad2l1,Cdc6,Fbxo5,Birc5,Haus5,F630043A04Rik,Prc1	338	100	6890	3.66923	0.00170698	0.000155301	0.00758825
	GO:0044454~nuclear chromosome part	17	3.03571	5.89907e-06	60406, 16319, 19891, 19361, 15270, 68275, 12235, 17688, 78658, 17216, 72415, 18968, 19076, 20937, 19075, 64707, 58186	Sap30,Incenp,Rpa2,Rad51,H2afx,Rpa1,Bub1,Msh6,Ncapd3,Mcm2,Sgol1,Pola1,Prim2,Suv39h1,Prim1,Suv39h2,Rad18	338	90	6890	3.85043	0.00177405	0.000147958	0.00788665
	GO:0044430~cytoskeletal part	47	8.39286	4.85876e-05	16580, 74107, 109711, 16663, 17869, 60595, 56150, 19385, 23834, 16906, 26556, 67141, 72776, 326618, 11799, 16665, 16669, 67951, 109242, 18102, 70799, 16319, 26934, 108907, 227613, 20873, 17427, 67203, 208628, 70385, 20878, 209737, 338367, 20877, 73689, 240641, 22350, 12189, 71909, 80986, 219114, 52276, 22145, 233406, 74127, 22143, 244329	Kifc5b,Cep55,Actn1,Krt13,Myc,Actn4,Mad2l1,Ranbp1,Cdc6,Lmnb1,Homer1,Fbxo5,Sass6,Tpm4,Birc5,Krt15,Krt19,Tubb6,Kif24,Nme1,Cep192,Incenp,Racgap1,Nusap1,Tubb4b,Plk4,Mns1,Nde1,Kntc1,Ccdc99,Aurka,Kif15,Myo1d,Aurkb,Bloc1s2,Kif20b,Ezr,Brca1,Haus5,Ckap2,F630043A04Rik,Cdca8,Tuba4a,Prc1,Krt80,Tuba1b,Mcph1	338	520	6890	1.84246	0.0145188	0.00112438	0.0649412
	GO:0015630~microtubule cytoskeleton	36	6.42857	0.000212295	16580, 74107, 17869, 56150, 19385, 23834, 67141, 72776, 11799, 67951, 109242, 18102, 70799, 16319, 26934, 108907, 227613, 20873, 67203, 70385, 208628, 20878, 209737, 20877, 73689, 240641, 22350, 12189, 71909, 219114, 80986, 52276, 22145, 233406, 22143, 244329	Kifc5b,Cep55,Myc,Mad2l1,Ranbp1,Cdc6,Fbxo5,Sass6,Birc5,Tubb6,Kif24,Nme1,Cep192,Incenp,Racgap1,Nusap1,Tubb4b,Plk4,Nde1,Ccdc99,Kntc1,Aurka,Kif15,Aurkb,Bloc1s2,Kif20b,Ezr,Brca1,Haus5,F630043A04Rik,Ckap2,Cdca8,Tuba4a,Prc1,Tuba1b,Mcph1	338	382	6890	1.92106	0.0619083	0.00455442	0.283462
	GO:0005856~cytoskeleton	59	10.5357	0.000333029	16580, 235559, 23790, 19387, 56150, 19385, 16906, 26556, 11733, 75646, 109242, 70799, 26934, 108907, 227613, 67203, 209737, 73689, 22350, 80986, 223881, 52276, 54132, 22145, 233406, 74127, 22143, 244329, 12649, 109711, 74107, 16663, 17869, 60595, 23834, 67141, 72776, 326618, 11799, 16665, 16669, 67951, 18102, 16319, 20873, 17427, 208628, 70385, 20878, 338367, 20877, 13367, 240641, 12189, 71909, 2…	Kifc5b,Topbp1,Coro1c,Rangap1,Mad2l1,Ranbp1,Lmnb1,Homer1,Ank1,Rai14,Kif24,Cep192,Racgap1,Nusap1,Tubb4b,Nde1,Kif15,Bloc1s2,Ezr,Ckap2,Rnd1,Cdca8,Pdlim1,Tuba4a,Prc1,Krt80,Tuba1b,Mcph1,Chek1,Actn1,Cep55,Krt13,Myc,Actn4,Cdc6,Fbxo5,Sass6,Tpm4,Birc5,Krt15,Krt19,Tubb6,Nme1,Incenp,Plk4,Mns1,Kntc1,Ccdc99,Aurka,Myo1d,Aurkb,Diap1,Kif20b,Brca1,Haus5,Sprr2k,F630043A04Rik,Parvb,Rin1	338	762	6890	1.57834	0.0953965	0.00666161	0.444338
	GO:0043601~nuclear replisome	5	0.892857	0.000582413	19891, 18968, 19076, 19075, 68275	Rpa2,Pola1,Prim2,Prim1,Rpa1	338	9	6890	11.3248	0.160843	0.0109	0.775875
	GO:0030894~replisome	5	0.892857	0.000582413	19891, 18968, 19076, 19075, 68275	Rpa2,Pola1,Prim2,Prim1,Rpa1	338	9	6890	11.3248	0.160843	0.0109	0.775875
	GO:0043596~nuclear replication fork	5	0.892857	0.000933433	19891, 18968, 19076, 19075, 68275	Rpa2,Pola1,Prim2,Prim1,Rpa1	338	10	6890	10.1923	0.245043	0.016399	1.2408
	GO:0000785~chromatin	15	2.67857	0.00175176	60406, 16319, 15270, 66929, 15201, 15364, 50887, 17688, 21917, 18968, 20937, 13433, 75339, 64707, 58186	Sap30,Incenp,H2afx,Asf1b,Hells,Hmga2,Hmgn5,Msh6,Tmpo,Pola1,Suv39h1,Dnmt1,Mphosph8,Suv39h2,Rad18	338	118	6890	2.59126	0.410065	0.0288934	2.31686
	GO:0001673~male germ cell nucleus	5	0.892857	0.00203499	15270, 235559, 69716, 12144, 68275	H2afx,Topbp1,Trip13,Blm,Rpa1	338	12	6890	8.49359	0.458361	0.0317562	2.68676
	GO:0005882~intermediate filament	6	1.07143	0.00229161	17427, 16663, 16665, 16669, 16906, 74127	Mns1,Krt13,Krt15,Krt19,Lmnb1,Krt80	338	20	6890	6.11538	0.498708	0.033939	3.02079
	GO:0000794~condensed nuclear chromosome	7	1.25	0.00340968	19361, 16319, 78658, 72415, 235559, 68275, 12235	Rad51,Incenp,Ncapd3,Sgol1,Topbp1,Rpa1,Bub1	338	31	6890	4.60298	0.642303	0.0477766	4.46377
	GO:0045111~intermediate filament cytoskeleton	6	1.07143	0.00359119	17427, 16663, 16665, 16669, 16906, 74127	Mns1,Krt13,Krt15,Krt19,Lmnb1,Krt80	338	22	6890	5.55944	0.661386	0.0480307	4.69615
	GO:0043073~germ cell nucleus	5	0.892857	0.00380715	15270, 235559, 69716, 12144, 68275	H2afx,Topbp1,Trip13,Blm,Rpa1	338	14	6890	7.28022	0.682773	0.0486936	4.97194
GOTERM_MF_FAT	GO:0001882~nucleoside binding	106	18.9286	8.46126e-10	18746, 50790, 77782, 270685, 70358, 74051, 17218, 17688, 17217, 17216, 237911, 17215, 17219, 56532, 68603, 22137, 327762, 109242, 20775, 72151, 15201, 320209, 209737, 12795, 52033, 14629, 104806, 21973, 50720, 211770, 19092, 11852, 23834, 14933, 12235, 51797, 18669, 79456, 14211, 623474, 18102, 11928, 214901, 18712, 20873, 13178, 19087, 20878, 16881, 338367, 20877, 18655, 68278, 240641, 70584, 56…	Pkm2,Acsl4,Polq,Mthfd1l,Steap1,Steap2,Mcm5,Msh6,Mcm4,Mcm2,Brip1,Mcm3,Mcm6,Ripk3,Pmvk,Ttk,Dna2,Kif24,Sqle,Rfc5,Hells,Ddx11,Kif15,Plk3,Pbk,Gclc,Fancm,Top2a,Sacs,Trib1,Prkg2,Rhob,Cdc6,Gyk,Bub1,Ctps,Abcb1b,Recql4,Smc2,Rad54b,Nme1,Atp1a1,Chtf18,Pim1,Plk4,Dck,Prkar2a,Aurka,Lig1,Myo1d,Aurkb,Pgk1,Ddx39,Kif20b,Pak4,Pfkp,Ttf2,Acly,Melk,Kifc5b,Cdk6,Ddx21,Uba6,Vrk1,Fignl1,Nubp1,Abcb1a,Cda,Pask,Uhmk1,Iars,Atp…	388	1172	7609	1.77368	4.81446e-07	4.81446e-07	1.24059e-06
	GO:0005524~ATP binding	99	17.6786	5.81118e-09	18746, 50790, 77782, 270685, 17218, 17688, 17217, 17216, 237911, 17215, 17219, 56532, 68603, 22137, 327762, 109242, 72151, 15201, 320209, 209737, 12795, 52033, 14629, 104806, 21973, 50720, 211770, 19092, 23834, 12235, 14933, 51797, 18669, 79456, 14211, 623474, 18102, 11928, 214901, 18712, 20873, 13178, 20878, 16881, 338367, 20877, 18655, 68278, 240641, 70584, 56421, 74044, 104112, 17279, 16580, 1…	Pkm2,Acsl4,Polq,Mthfd1l,Mcm5,Msh6,Mcm4,Mcm2,Brip1,Mcm3,Mcm6,Ripk3,Pmvk,Ttk,Dna2,Kif24,Rfc5,Hells,Ddx11,Kif15,Plk3,Pbk,Gclc,Fancm,Top2a,Sacs,Trib1,Prkg2,Cdc6,Bub1,Gyk,Ctps,Abcb1b,Recql4,Smc2,Rad54b,Nme1,Atp1a1,Chtf18,Pim1,Plk4,Dck,Aurka,Lig1,Myo1d,Aurkb,Pgk1,Ddx39,Kif20b,Pak4,Pfkp,Ttf2,Acly,Melk,Kifc5b,Cdk6,Ddx21,Uba6,Vrk1,Fignl1,Nubp1,Abcb1a,Pask,Uhmk1,Iars,Atp10a,Ube2s,Ehd4,Aacs,Rps6ka6,Tk1,Mcm8…	388	1102	7609	1.76177	3.30655e-06	6.61312e-07	8.52034e-06
	GO:0030554~adenyl nucleotide binding	103	18.3929	5.04495e-09	18746, 50790, 77782, 270685, 70358, 74051, 17218, 17688, 17217, 17216, 237911, 17215, 17219, 56532, 68603, 22137, 327762, 109242, 20775, 72151, 15201, 320209, 209737, 12795, 52033, 14629, 104806, 21973, 50720, 211770, 19092, 23834, 12235, 14933, 51797, 18669, 79456, 14211, 623474, 18102, 11928, 214901, 18712, 20873, 13178, 19087, 20878, 16881, 338367, 20877, 18655, 68278, 240641, 70584, 56421, 74…	Pkm2,Acsl4,Polq,Mthfd1l,Steap1,Steap2,Mcm5,Msh6,Mcm4,Mcm2,Brip1,Mcm3,Mcm6,Ripk3,Pmvk,Ttk,Dna2,Kif24,Sqle,Rfc5,Hells,Ddx11,Kif15,Plk3,Pbk,Gclc,Fancm,Top2a,Sacs,Trib1,Prkg2,Cdc6,Bub1,Gyk,Ctps,Abcb1b,Recql4,Smc2,Rad54b,Nme1,Atp1a1,Chtf18,Pim1,Plk4,Dck,Prkar2a,Aurka,Lig1,Myo1d,Aurkb,Pgk1,Ddx39,Kif20b,Pak4,Pfkp,Ttf2,Acly,Melk,Kifc5b,Cdk6,Ddx21,Uba6,Vrk1,Fignl1,Nubp1,Abcb1a,Pask,Uhmk1,Iars,Atp10a,Ube2s…	388	1162	7609	1.73831	2.87057e-06	7.17644e-07	7.3969e-06
	GO:0032559~adenyl ribonucleotide binding	100	17.8571	3.96427e-09	18746, 50790, 77782, 270685, 17218, 17688, 17217, 17216, 237911, 17215, 17219, 56532, 68603, 22137, 327762, 109242, 72151, 15201, 320209, 209737, 12795, 52033, 14629, 104806, 21973, 50720, 211770, 19092, 23834, 12235, 14933, 51797, 18669, 79456, 14211, 623474, 18102, 11928, 214901, 18712, 20873, 13178, 19087, 20878, 16881, 338367, 20877, 18655, 68278, 240641, 70584, 56421, 74044, 104112, 17279, 1…	Pkm2,Acsl4,Polq,Mthfd1l,Mcm5,Msh6,Mcm4,Mcm2,Brip1,Mcm3,Mcm6,Ripk3,Pmvk,Ttk,Dna2,Kif24,Rfc5,Hells,Ddx11,Kif15,Plk3,Pbk,Gclc,Fancm,Top2a,Sacs,Trib1,Prkg2,Cdc6,Bub1,Gyk,Ctps,Abcb1b,Recql4,Smc2,Rad54b,Nme1,Atp1a1,Chtf18,Pim1,Plk4,Dck,Prkar2a,Aurka,Lig1,Myo1d,Aurkb,Pgk1,Ddx39,Kif20b,Pak4,Pfkp,Ttf2,Acly,Melk,Kifc5b,Cdk6,Ddx21,Uba6,Vrk1,Fignl1,Nubp1,Abcb1a,Pask,Uhmk1,Iars,Atp10a,Ube2s,Ehd4,Aacs,Rps6ka6,…	388	1110	7609	1.76674	2.25567e-06	7.5189e-07	5.81241e-06
	GO:0001883~purine nucleoside binding	104	18.5714	2.89868e-09	18746, 50790, 77782, 270685, 70358, 74051, 17218, 17688, 17217, 17216, 237911, 17215, 17219, 56532, 68603, 22137, 327762, 109242, 20775, 72151, 15201, 320209, 209737, 12795, 52033, 14629, 104806, 21973, 50720, 211770, 19092, 11852, 23834, 12235, 14933, 51797, 18669, 79456, 14211, 623474, 18102, 11928, 214901, 18712, 20873, 13178, 19087, 20878, 16881, 338367, 20877, 18655, 68278, 240641, 70584, 56…	Pkm2,Acsl4,Polq,Mthfd1l,Steap1,Steap2,Mcm5,Msh6,Mcm4,Mcm2,Brip1,Mcm3,Mcm6,Ripk3,Pmvk,Ttk,Dna2,Kif24,Sqle,Rfc5,Hells,Ddx11,Kif15,Plk3,Pbk,Gclc,Fancm,Top2a,Sacs,Trib1,Prkg2,Rhob,Cdc6,Bub1,Gyk,Ctps,Abcb1b,Recql4,Smc2,Rad54b,Nme1,Atp1a1,Chtf18,Pim1,Plk4,Dck,Prkar2a,Aurka,Lig1,Myo1d,Aurkb,Pgk1,Ddx39,Kif20b,Pak4,Pfkp,Ttf2,Acly,Melk,Kifc5b,Cdk6,Ddx21,Uba6,Vrk1,Fignl1,Nubp1,Abcb1a,Pask,Uhmk1,Iars,Atp10a,…	388	1166	7609	1.74916	1.64935e-06	8.24673e-07	4.25004e-06
	GO:0017076~purine nucleotide binding	112	20	3.95446e-07	18746, 50790, 77782, 270685, 70358, 74051, 17218, 17688, 17217, 17216, 237911, 17215, 17219, 56532, 68603, 22137, 327762, 109242, 20775, 72151, 15201, 320209, 209737, 12795, 52033, 14629, 104806, 223881, 21973, 50720, 22145, 211770, 22143, 19092, 11852, 23834, 14933, 12235, 51797, 18669, 79456, 14211, 623474, 18102, 11928, 214901, 18712, 20873, 13178, 19087, 20878, 20877, 16881, 338367, 18655, 32…	Pkm2,Acsl4,Polq,Mthfd1l,Steap1,Steap2,Mcm5,Msh6,Mcm4,Mcm2,Brip1,Mcm3,Mcm6,Ripk3,Pmvk,Ttk,Dna2,Kif24,Sqle,Rfc5,Hells,Ddx11,Kif15,Plk3,Pbk,Gclc,Fancm,Rnd1,Top2a,Sacs,Tuba4a,Trib1,Tuba1b,Prkg2,Rhob,Cdc6,Gyk,Bub1,Ctps,Abcb1b,Recql4,Smc2,Rad54b,Nme1,Atp1a1,Chtf18,Pim1,Plk4,Dck,Prkar2a,Aurka,Aurkb,Lig1,Myo1d,Pgk1,Arl4c,Ddx39,Kif20b,Pak4,Pfkp,Rras2,Ttf2,Acly,Melk,Kifc5b,Cdk6,Ddx21,Uba6,Ran,Vrk1,Fignl1,A…	388	1411	7609	1.55664	0.000224983	2.50006e-05	0.000579801
	GO:0000166~nucleotide binding	128	22.8571	2.65338e-07	18746, 50790, 260315, 77782, 270685, 70358, 74051, 17688, 17218, 17217, 72692, 17216, 17215, 237911, 15357, 17219, 56532, 68603, 22137, 327762, 109242, 20775, 72151, 15201, 320209, 209737, 12795, 52033, 14629, 104806, 223881, 21973, 50720, 22145, 211770, 22143, 19092, 11852, 23834, 14933, 12235, 18669, 51797, 79456, 14211, 623474, 11928, 18102, 214901, 18712, 20873, 13178, 19087, 20878, 20877, 16…	Pkm2,Acsl4,Nav3,Polq,Mthfd1l,Steap1,Steap2,Msh6,Mcm5,Mcm4,Hnrpll,Mcm2,Mcm3,Brip1,Hmgcr,Mcm6,Ripk3,Pmvk,Ttk,Dna2,Kif24,Sqle,Rfc5,Hells,Ddx11,Kif15,Plk3,Pbk,Gclc,Fancm,Rnd1,Top2a,Sacs,Tuba4a,Trib1,Tuba1b,Prkg2,Rhob,Cdc6,Gyk,Bub1,Abcb1b,Ctps,Recql4,Smc2,Rad54b,Atp1a1,Nme1,Chtf18,Pim1,Plk4,Dck,Prkar2a,Aurka,Aurkb,Lig1,Myo1d,Pgk1,Arl4c,Ddx39,Kif20b,Pak4,Dhfr,Rras2,Pfkp,Ttf2,Acly,Melk,Kifc5b,Cdk6,Ddx21…	388	1670	7609	1.50311	0.000150966	2.51626e-05	0.000389038
	GO:0032553~ribonucleotide binding	109	19.4643	3.6377e-07	18746, 50790, 77782, 270685, 17218, 17688, 17217, 17216, 237911, 17215, 17219, 56532, 68603, 22137, 327762, 109242, 72151, 15201, 320209, 209737, 12795, 52033, 14629, 104806, 223881, 21973, 50720, 22145, 211770, 22143, 19092, 11852, 23834, 14933, 12235, 51797, 18669, 79456, 14211, 623474, 18102, 11928, 214901, 18712, 20873, 13178, 19087, 20878, 16881, 338367, 20877, 18655, 320982, 68278, 240641, …	Pkm2,Acsl4,Polq,Mthfd1l,Mcm5,Msh6,Mcm4,Mcm2,Brip1,Mcm3,Mcm6,Ripk3,Pmvk,Ttk,Dna2,Kif24,Rfc5,Hells,Ddx11,Kif15,Plk3,Pbk,Gclc,Fancm,Rnd1,Top2a,Sacs,Tuba4a,Trib1,Tuba1b,Prkg2,Rhob,Cdc6,Gyk,Bub1,Ctps,Abcb1b,Recql4,Smc2,Rad54b,Nme1,Atp1a1,Chtf18,Pim1,Plk4,Dck,Prkar2a,Aurka,Lig1,Myo1d,Aurkb,Pgk1,Arl4c,Ddx39,Kif20b,Pak4,Pfkp,Rras2,Ttf2,Acly,Melk,Kifc5b,Cdk6,Ddx21,Uba6,Ran,Vrk1,Fignl1,Abcb1a,Nubp1,Pask,Uh…	388	1359	7609	1.57291	0.000206964	2.58728e-05	0.000533358
	GO:0032555~purine ribonucleotide binding	109	19.4643	3.6377e-07	18746, 50790, 77782, 270685, 17218, 17688, 17217, 17216, 237911, 17215, 17219, 56532, 68603, 22137, 327762, 109242, 72151, 15201, 320209, 209737, 12795, 52033, 14629, 104806, 223881, 21973, 50720, 22145, 211770, 22143, 19092, 11852, 23834, 14933, 12235, 51797, 18669, 79456, 14211, 623474, 18102, 11928, 214901, 18712, 20873, 13178, 19087, 20878, 16881, 338367, 20877, 18655, 320982, 68278, 240641, …	Pkm2,Acsl4,Polq,Mthfd1l,Mcm5,Msh6,Mcm4,Mcm2,Brip1,Mcm3,Mcm6,Ripk3,Pmvk,Ttk,Dna2,Kif24,Rfc5,Hells,Ddx11,Kif15,Plk3,Pbk,Gclc,Fancm,Rnd1,Top2a,Sacs,Tuba4a,Trib1,Tuba1b,Prkg2,Rhob,Cdc6,Gyk,Bub1,Ctps,Abcb1b,Recql4,Smc2,Rad54b,Nme1,Atp1a1,Chtf18,Pim1,Plk4,Dck,Prkar2a,Aurka,Lig1,Myo1d,Aurkb,Pgk1,Arl4c,Ddx39,Kif20b,Pak4,Pfkp,Rras2,Ttf2,Acly,Melk,Kifc5b,Cdk6,Ddx21,Uba6,Ran,Vrk1,Fignl1,Abcb1a,Nubp1,Pask,Uh…	388	1359	7609	1.57291	0.000206964	2.58728e-05	0.000533358
	GO:0003677~DNA binding	102	18.2143	3.49792e-07	12190, 26909, 77782, 15354, 59093, 18019, 17218, 17688, 17217, 17216, 237911, 17215, 108961, 17219, 327762, 217653, 20893, 72151, 15201, 218973, 320209, 14283, 97165, 268465, 104806, 22608, 67177, 21973, 69928, 16477, 18538, 28113, 209334, 170676, 14156, 17869, 17865, 17864, 223970, 13433, 109019, 623474, 58186, 71093, 214901, 16881, 110052, 50887, 68275, 12189, 74044, 20666, 17349, 235559, 10782…	Brca2,Exo1,Polq,Hmgb3,Pcbp3,Nfatc2,Mcm5,Msh6,Mcm4,Mcm2,Brip1,Mcm3,E2f8,Mcm6,Dna2,Mis18bp1,Bhlhe40,Rfc5,Hells,Wdhd1,Ddx11,Fosl1,Hmgb2,Eme1,Fancm,Ybx1,Cdt1,Top2a,Apitd1,Junb,Pcna,Tinf2,Gen1,Peg10,Fen1,Myc,Mybl2,Mybl1,A630055G03Rik,Dnmt1,Obfc2a,Rad54b,Rad18,Atoh8,Chtf18,Lig1,Dek,Hmgn5,Rpa1,Brca1,Ttf2,Sox11,Mlf1,Topbp1,Whsc1,Dlx2,Dlx1,Zfp367,Smad6,Smad7,Pold1,Pole,Pole2,Tead4,Hr,Smad9,Nusap1,Hdgf,Bah…	388	1243	7609	1.60926	0.000199012	2.84327e-05	0.000512864
	GO:0004386~helicase activity	17	3.03571	0.000387637	236930, 15201, 56200, 77782, 320209, 12144, 19366, 68278, 17220, 17217, 104806, 237911, 74044, 17219, 79456, 327762, 623474	Ercc6l,Hells,Ddx21,Polq,Ddx11,Blm,Rad54l,Ddx39,Mcm7,Mcm4,Fancm,Brip1,Ttf2,Mcm6,Recql4,Dna2,Rad54b	388	121	7609	2.75524	0.197969	0.0218192	0.56685
KEGG_PATHWAY	mmu04110: Cell cycle	29	5.17857	1.89942e-09	12571, 218294, 12649, 17869, 56150, 23834, 12235, 17218, 17217, 17220, 12448, 17216, 17215, 22390, 12447, 105988, 27401, 19650, 12444, 12443, 17219, 12428, 22137, 12544, 27214, 17873, 18392, 18538, 12534	Cdk6,Cdc14b,Chek1,Myc,Mad2l1,Cdc6,Bub1,Mcm5,Mcm4,Mcm7,Ccne2,Mcm2,Mcm3,Wee1,Ccne1,Espl1,Skp2,Rbl1,Ccnd2,Ccnd1,Mcm6,Ccna2,Ttk,Cdc45,Dbf4,Gadd45b,Orc1,Pcna,Cdk1	217	118	3163	3.58225	2.6212e-07	1.3106e-07	2.23547e-06
	mmu03030: DNA replication	21	3.75	2.68347e-15	19891, 72151, 14156, 16881, 18971, 68275, 106344, 18973, 18974, 17218, 17220, 17217, 17216, 18968, 17215, 19076, 19075, 17219, 69263, 18538, 327762	Rpa2,Rfc5,Fen1,Lig1,Pold1,Rpa1,Rfc4,Pole,Pole2,Mcm5,Mcm7,Mcm4,Mcm2,Pola1,Mcm3,Prim2,Prim1,Mcm6,Rfc3,Pcna,Dna2	217	35	3163	8.74562	3.67706e-13	3.67706e-13	3.13083e-12
	mmu03430: Mismatch repair	10	1.78571	6.23107e-06	17688, 19891, 26909, 72151, 69263, 16881, 18538, 18971, 106344, 68275	Msh6,Rpa2,Exo1,Rfc5,Rfc3,Lig1,Pcna,Pold1,Rfc4,Rpa1	217	22	3163	6.62547	0.00085952	0.000286589	0.00733323
	mmu03420: Nucleotide excision repair	10	1.78571	0.00199303	19891, 72151, 69263, 16881, 18538, 18971, 18973, 106344, 68275, 18974	Rpa2,Rfc5,Rfc3,Lig1,Pcna,Pold1,Pole,Rfc4,Rpa1,Pole2	217	43	3163	3.38978	0.240665	0.0448485	2.32063
	mmu00240: Pyrimidine metabolism	19	3.39286	1.02193e-05	66491, 13178, 21877, 18971, 320685, 22271, 18973, 18974, 110074, 22171, 51797, 18968, 72269, 19076, 19075, 20133, 67486, 20135, 18102	Polr2l,Dck,Tk1,Pold1,Dctd,Upp1,Pole,Pole2,Dut,Tyms,Ctps,Pola1,Cda,Prim2,Prim1,Rrm1,Polr3g,Rrm2,Nme1	217	85	3163	3.25817	0.00140928	0.000352505	0.0120266
	mmu03440: Homologous recombination	10	1.78571	4.33833e-05	19361, 19891, 12190, 268465, 17535, 12144, 18971, 19366, 623474, 68275	Rad51,Rpa2,Brca2,Eme1,Mre11a,Blm,Pold1,Rad54l,Rad54b,Rpa1	217	27	3163	5.39853	0.00596914	0.00119669	0.0510469
