# Supplementary material for: A systems-level approach to parental genomic imprinting: the imprinted gene network includes extracellular matrix genes and regulates cell cycle exit and differentiation
Source: HighWire-hosted journal article supplement (doi:10.1101/gr.175919.114), 2015-01-22
Supplement: Table_S18.xlsx [file Table_S18.xlsx]

## Sheet: Table S18
PCR amplification of bisulfite treated DNA
Primer name	Sequence	Genomic localization of the amplicon (mm9)	Data displayed in …
BSP-H19-CpG2-3652F	GGGTTATGGGGTGGTATAATAT	chr7:149,765,951-149,766,349	Figure 4A
BSP-H19-CpG2-4050R	TTAAACCCCAACCTCTACTTTT
BSP-Igf2rC-112F	GGGGAATTGAGGTAAGTTAGGGTTTT	chr17:12,934,280-12,934,550	Figure 4B
BSP-Igf2rC-382R	TCTTATAACCCAAAAATCTTCACCCTAAC
BSP-Dlk1Meg3G-2965F	GTGTTGTAATTAGTTATAGTGGAGAGTATGTT	chr12:110,768,671-110,769,098	Figure 4C
BSP-Dlk1Meg3G-outR	TCCCCCCACCAAAAACTAACC
BSP-MestH-1385F	GTGAATTATGGTATAGAAGGATGTGAAGGT	chr6:30,685,391-30,685,893	Figure 4D
BSP-MestH-1887R	CTCTCAACCACAAAAACAATTCCAATCCAA
pMeg3-Fw	GGATTAGTTTTTTTGTGTTAAGTTTTAGAG	chr12:110,768,671-110,769,099	Figure S8A
pMeg3-Rv	TAAAAACTATCACCCCCACATAAAATACCC
McrBC analysis
Primer name	Sequence	Genomic localization of the amplicon (mm9)	Data displayed in …
IAP-F	TATGCCGAGGGTGGTTCTCTA	intracisternal A-particle (IAP) retrotransposon with multiple localizations	Figure S8B
IAP-R	TGCGGCAAAACTTTATTGCTT
Peg3-F	TTGGTTAGAGAGGAAGCTCCG	chr7:6,683,085-6,683,198	Figure S8B
Peg3-R	CTCCTCCGATGCTCGTCCTC
KvDMR-F	CTCAGTTCCACGATACCCTTCC	chr7:150,481,154-150,481,453	Figure S8B
Kv-DMR-R	CTTACAGAAGCAGGGGTGGTCT
promMeg3-F	CCACAGGGACCCCATTTTCA	chr12:110,778,431-110,778,545	Figure S8B
promMeg3-R	GGACCCATTTCTGCCCGTTA
H19-F	ACGCGGCAGTTTCTATGTCT	chr7:149,766,002-149,766,115	Figure S8B
H19-R	TGCACTTACGGAATGGTCCC
Igf2r-2-F	GGATTCCACGCGTTAGAGGA	chr17:12,934,373-12,934,457	Figure S8B
Igf2r-2-R	CGGATCAGTGGAACCCTCAC
Dlk1-Meg3-F	ACCTCCGTGAACTAGCGAGGA	chr12:110,766,560-110,766,610	Figure S8B
Dlk1-Meg3-R	ACGCGAAGCGGCATTAGTA
Dlk1-Meg3-CpG-free-F	AGAAGCTGTGGTGGGATTGCT	chr12:110,767,879-110,767,929	Figure S8B
Dlk1-Meg3-CpG-free-R	AGGGCCACTTGCATCAGAAT
Col1a2-F	AAAGAGAAGGATTGGTCAGAGCAGT	chr6:4,490,809-4,490,868	Figure S8B (normalization)
Col1a2-R	GCCAAGGGAGGAGACTTAGTTG
Col3a1-F	TTGCTGTTTCAACCACCCAATA	chr1:45,405,749-45,405,828	Figure S8B (normalization)
Col3a1-R	CATTGAGACATTTTGAAGTTGGAATT
Col9a2-F	CTCTGGACTTATTTTTATTGGGTATCTTTT	chr4:120,727,741-120,727,858	Figure S8B (normalization)
Col9a2-R	CAGGGAAGATGGATGTTTAAATACTG
