# Supplementary material for: A systems-level approach to parental genomic imprinting: the imprinted gene network includes extracellular matrix genes and regulates cell cycle exit and differentiation
Source: HighWire-hosted journal article supplement (doi:10.1101/gr.175919.114), 2015-01-22
Supplement: Table_S19.xlsx [file Table_S19.xlsx]

## Sheet: cDNA clones
cDNA	IMAGE clone ID	Acc. No.	Insert	Insert size (bp)	Receiving vector
Cdkn1c	3490380	BC005412	SalI-HindIII	1.387	pRK5-SalI-HindIII
Dcn	2865386	BQ265815, BQ265816	EcoRI-HindIII	1.407	pRK5-EcoRI-HindIII
Dlk1	6581768	BU554462, BC052159	EcoRI-XbaI	1.671	pRK5-EcoRI-XbaI
Gatm	3495871	BC003879	SalI-HindIII	2.47	pRK5-SalI-HindIII
Gnas	6822390	BC062654	XbaI-HindIII	3.452	pRK5-XbaI-HindIII
Grb10	6311825	BC053842	StuI-HindIII	2.693	pRK5-SmaI-HindIII
Meg3	6831921	BC048191	PstI-SalI	3.874	pRK5-PstI-SalI
Igf2	30013295	BC053489	EcoRI-HindIII	1.477	pRK5-EcoRI-HindIII
Ascl2	4163833	BC019520	EcoRI-XbaI	1.445	pRK5-EcoRI-XbaI
Mest	3482928	BC006639	EcoRI-HindIII	2.643	pRK5-EcoRI-HindIII
Ndn	4214666	BC015268	SmaI-HindIII	1.827	pRK5-SmaI-HindIII
Nnat	4981517	BC036984	EcoRI-XbaI	1.229	pRK5-EcoRI-XbaI
Osbpl5	6832073	BC078972	EcoRI-AvrII	2.774	pRK5-EcoRI-XbaI
Peg3	30543809, 6308481	BC048778, BC072661	BC072661: EcoRI; BC048778: SalI-BstEII	5.412	pRK5-EcoRI; pRK5-SalI-BstEII
Pon2	3482584	BC055896	EcoRI-XbaI	1.892	pRK5-EcoRI-XbaI
Sgce	4013227	BC012665	SmaI-XbaI	1.644	pRK5-SmaI-XbaI
Slc38a4	5098067	BC024123	SalI-HindIII	2.008	pRK5-SalI-HindIII
Ube3a	40110336	BC131658	SalI-NsiI	3.508	pRK5-SalI-NsiI
Plagl1	see Spengler et al. (1997) EMBO J. 16:2814-25 for details.			2.997	pRK8
