# Supplementary material for: A systems-level approach to parental genomic imprinting: the imprinted gene network includes extracellular matrix genes and regulates cell cycle exit and differentiation
Source: HighWire-hosted journal article supplement (doi:10.1101/gr.175919.114), 2015-01-22
Supplement: Table_S20.xlsx [file Table_S20.xlsx]

## Sheet: Validated siRNAs + esiRNAs
Symbol	siRNA	Target sequence	Sens	Antisens
Copg2	si-Copg2-2	CAGGCCATTGTGGATAAAGTA	GGCCAUUGUGGAUAAAGUATT	UACUUUAUCCACAAUGGCCUG
	si-Copg2-4	CACATAAAGATTAATAATGAT	CAUAAAGAUUAAUAAUGAUTT	AUCAUUAUUAAUCUUUAUGUG
Dcn	si-Dcn-5	AAGCCTTATTTGAGTATGTAA	GCCUUAUUUGAGUAUGUAATT	UUACAUACUCAAAUAAGGCUU
	si-Dcn-6	CTGAATATACAGATTGAATAA	GAAUAUACAGAUUGAAUAATT	UUAUUCAAUCUGUAUAUUCAG
Dlk1	si-Dlk1-gc	CCATCGTCTTTCTCAACAAGT	AUCGUCUUUCUCAACAAGUTT	ACUUGUUGAGAAAGACGAUGG
	si-Dlk1-6	TAATAAGAATTTCATCTCTAA	AUAAGAAUUUCAUCUCUAATT	UUAGAGAUGAAAUUCUUAUUA
Gnas	si-Gnas-1	ATCCTGCATGTTAATGGGTTT	CCUGCAUGUUAAUGGGUUUTT	AAACCCAUUAACAUGCAGGAU
	si Gnas (ex2-1)	ATGTTAATGGGTTTAACGGAG	GUUAAUGGGUUUAACGGAGTT	CUCCGUUAAACCCAUUAACAU
Grb10	si-Grb10-2	ACGGAATGCTCCTGTACCAAA	GGAAUGCUCCUGUACCAAATT	UUUGGUACAGGAGCAUUCCGU
	si-Grb10-4	TCGGTTGCTCCTAGCTCCTTA	GGUUGCUCCUAGCUCCUUATT	UAAGGAGCUAGGAGCAACCGA
H19	si-H19-4	TGGAAGCAGTTCCATCATAAA	GAAGCAGUUCCAUCAUAAATT	UUUAUGAUGGAACUGCUUCCA
	si-H19-5	CAAGAAGATGCTGCAATCAGA	AGAAGAUGCUGCAAUCAGATT	UCUGAUUGCAGCAUCUUCUUG
Igf2	si-Igf2-8	AACCATCAGTGAATCAAATTA	CCAUCAGUGAAUCAAAUUATT	UAAUUUGAUUCACUGAUGGUU
	si-Igf2-9	AAGGTGCTCGGAGGCCACAAA	GGUGCUCGGAGGCCACAAATT	UUUGUGGCCUCCGAGCACCUU
Igf2r	si-Igf2r-7	CTGGAGGAAACTGGTATGCTA	GGAGGAAACUGGUAUGCUATT	UAGCAUACCAGUUUCCUCCAG
	si-Igf2r-8	CTGCATGGTGTCAGAAGACAA	GCAUGGUGUCAGAAGACAATT	UUGUCUUCUGACACCAUGCAG
Mest	si-Mest-1	TCCAAGCTGAATAGTAAATAA	CAAGCUGAAUAGUAAAUAATT	UUAUUUACUAUUCAGCUUGGA
	si-Mest-2	CAGAAAGGCTTTCTCATATAA	GAAAGGCUUUCUCAUAUAATT	UUAUAUGAGAAAGCCUUUCUG
	si-Mest-3	CAGGTTGAAATTATTTGCAGA	GGUUGAAAUUAUUUGCAGATT	UCUGCAAAUAAUUUCAACCUG
	si-Mest-4	TTCCTTCACATTGGTGAACAA	CCUUCACAUUGGUGAACAATT	UUGUUCACCAAUGUGAAGGAA
Nap1l4	si-Nap1l4-2	ACCCTCGTACTTATTTATTTA	CCUCGUACUUAUUUAUUUATT	UAAAUAAAUAAGUACGAGGGU
	si-Nap1l4-4	AACGTACAAGATGAAATCAGA	CGUACAAGAUGAAAUCAGATT	UCUGAUUUCAUCUUGUACGUU
Ndn	si-Ndn-gc	GCTGTGCTAAACTTGTGAAAT	UGUGCUAAACUUGUGAAATTT	AUUUCACAAGUUUAGCACAGC
	si-Ndn-4	CTGGCCAGAGTCTTCAAGAAA	GGCCAGAGUCUUCAAGAAATT	UUUCUUGAAGACUCUGGCCAG
Osbpl5	si-Osbpl5-1	CAGCATCACAGCAAAGTCTAA	GCAUCACAGCAAAGUCUAATT	UUAGACUUUGCUGUGAUGCUG
	si-Osbpl5-2	CCGGCTAAAGATGCTACAAGA	GGCUAAAGAUGCUACAAGATT	UCUUGUAGCAUCUUUAGCCGG
Peg3	si-Peg3-gc	CCCTAATGACAAGCTGAAATT	CUAAUGACAAGCUGAAAUUTT	AAUUUCAGCUUGUCAUUAGGG
	si-Peg3-3	AGGCTCTTACATTGTAAATAA	GCUCUUACAUUGUAAAUAATT	UUUAUUAAGGGUCUGGUUCUG
	si-Peg3-4	CAGAACCAGACCCTTAATAAA	GAACCAGACCCUUAAUAAATT	UUUAUUAAGGGUCUGGUUCUG
Peg10	si-Peg10-1	TAGGATAAGTTAGATAAATTA	GGAUAAGUUAGAUAAAUUATT	UAAUUUAUCUAACUUAUCCUA
	si-Peg10-3	CAGCCTATGTTTACTATACAA	GCCUAUGUUUACUAUACAATT	UUGUAUAGUAAACAUAGGCUG
	si-Peg10-4	TAGGACGATTAGAGTAATCTA	GGACGAUUAGAGUAAUCUATT	UAGAUUACUCUAAUCGUCCUA
Pon2	si-Pon2-7	CAGTACTGACCTAGTAATATA	GUACUGACCUAGUAAUAUATT	UAUAUUACUAGGUCAGUACUG
	si-Pon2-10	ACCATCAGTACTGACCTAGTA	CAUCAGUACUGACCUAGUATT	UACUAGGUCAGUACUGAUGGU
Sgce	si-Sgce-5	GAGGTTAGTAATGATCCCATA	GGUUAGUAAUGAUCCCAUATT	UAUGGGAUCAUUACUAACCUC
	si-Sgce-7	ACAGCTCGATTCAGAAATCTA	AGCUCGAUUCAGAAAUCUATT	UAGAUUUCUGAAUCGUGCUGU
Slc38a4	si-Slc38a4-2	AACAGCCAATTTGCTAATGAA	CAGCCAAUUUGCUAAUGAATT	UUCAUUAGCAAAUUGGCUGUU
	si-Slc38a4-3	AAGGGTGTGCTGCAAATATTA	GGGUGUGCUGCAAAUAUUATT	UAAUAUUUGCAGCACACCCUU
Symbol	MISSION® esiRNA No.	Ref.	Lot No.
Copg2	esiRNA1	EMU047681	OGS
Dcn	esiRNA1	EMU065331	FHS
Dlk1	esiRNA1	EMU075601	OGS
Gnas	esiRNA1	EMU074141	OGS
Grb10	esiRNA1	EMU079041	FHS
H19	esiRNA1	EMU178341	KHS
Igf2	esiRNA1	EMU067961	OGS
Igf2r	esiRNA1	EMU065031	FHS
Nap1l4	esiRNA1	EMU067811	FHS
Osbpl5	esiRNA1	EMU061481	FHS
Pon2	esiRNA1	EMU006221	FHS
Slc38a4	esiRNA1	EMU038741	FHS
eGFP	esiRNA1	EHUEGFP	QCS or FHS
