# Supplementary material for: A systems-level approach to parental genomic imprinting: the imprinted gene network includes extracellular matrix genes and regulates cell cycle exit and differentiation
Source: HighWire-hosted journal article supplement (doi:10.1101/gr.175919.114), 2015-01-22
Supplement: Table_S21.xlsx [file Table_S21.xlsx]

## Sheet: House keeping genes
Symbol	Gene ID	Forward Seq.	Reverse Seq.
28S	236598	GCGAAACCACAGCCAAGG	AAGCTCAACAGGGTCTTCTTTCC
Actb	11461	CGTAGATGGGCACAGTGTGG	GCATTGTGATGGACTCCGGT
Alb	11657	GAGTGCTGCCATGGTGACCT	AAGTTCCGCCCTGTCATCTG
Aldoc	11676	CGGCACTGGCCATATTGG	ACAATAGGCACGATCCCATTCT
B2m	12010	TATGCTATCCAGAAAACCCCTCAA	GTATGTTCGGCTTCCCATTCTC
Gapdh	14433	GGAGCGAGACCCCACTAACA	ACATACTCAGCACCGGCCTC
Gusb	110006	GATTCAGATATCCGAGGGAAAGG	GCCAACGGAGCAGGTTGA
Hprt	15452	GCAGTACAGCCCCAAAATGG	GGTCCTTTTCACCAGCAAGCT
Mrpl32	75398	AGGTGCTGGGAGCTGCTACA	AAAGCGACTCCAGCTCTGCT
Tbp	21374	ACTTCGTGCAAGAAATGCTGAAT	CAGTTGTCCGTGGCTCTCTTATT
Tfrc	22042	AGACCTTGCACTCTTTGGACATG	GGTGTGTATGGATCACCAGTTCCTA

## Sheet: Imprinted Genes
Symbol	Gene ID	Forward Seq.	Reverse Seq.
Airn	104103	GTCCTCCTCCTTCACCTCCATT	GCTTGAGTCCAACAACTGTCCTT
Asb4	65255	CACAGTGTTTGAAGTTGAAGATGAGAA	AACCAATAGCCTTGTTTGTAAGATGC
Ascl2	17173	GCCGCACCAGAACTCGTAG	GCCGCCGTCCATCAAGC
Calcr	12311	GCGTAGTTAGTGCTCCTC	CTTCGTTGTTGCTGATTGG
Cdkn1c	12577	AACGTCTGAGATGAGTTAGTTTAGAGG	AAGCCCAGAGTTCTTCCATCGT
Commd1	17846	AGTCGATGGCAAGTCTCAGTCA	ACTTTAACTTCATCAAATTCCAGACACAA
Copg2	54160	TGATGTGGTTAAACGATGGATAAATGAAG	TGGAGACAGCAAGCCGATCAT
Copg2as2	100044236	CCAGCAGAGCAAACATTCAAACC	GTAACATTAAACACTTCCACCAAGAGAG
Dcn	13179	CATCTTCGAGTGGTGCAGTGTT	GCAGGTCTAGCAAGGTTGTGTC
Dio3	107585	ATGAACAGTTGCATGGTACTAGGC	GTCACTTGTCCCTTGGTTATTTAGAATC
Dlk1	13386	GACGGGAAATTCTGCGAAATAGAC	GTCCACGCAAGTTCCATTGTTG
Gatm	67092	CCGACCGTCCTTGTCATCAGA	TGGTGTTGGAGGAGTAACTATGGT
Gnas-exon1	14683	AGCGCGAGGCCAACAAAA	GTGCGTGGCCCGGTAGA
Gnas-exon1A	14683	GGGCGTCATCAGGCTGGTTA	GCCGACGCGACTGAGTGT
Gnas-XL	14683	CGTCTCTACCGGATCTGATGCT	CGGCATCGCTCTGGCTATCT
Grb10	14783	CACTGGAACGGAGAAGAG	ATTGATGTAGGTCGGTTGG
H19	14955	CTTGTCGTAGAAGCCGTCTGTTC	GTAGCACCATTTCTTTCATCTTGAGG
Htr2a	15558	CATATCCGTAGGTATATCCATGCCAAT	AATCATCCTGTAGCCCGAAGACT
Igf2	16002	GCTTGTTGACACGCTTCAGTTTG	GTTGGCACGGCTTGAAGGC
Igf2os	111975	TGAACCACCAACATGAGGATTGC	GAGGTCAGACAGCTCCAGAGG
Igf2r	16004	GCACAGAATCCAGACTAGCATTACA	CCTCCTTATCAGCTTTAAATATGTCTTTCTT
Impact	16210	CAGGTGATGTTGCCAAGTGAGT	TTTCAGCCAGGGAGCGTTCA
Ins2	16334	CATCAGCAAGCAGGAAG	CCCAGAGGAAGAGCAG
Ipw	16353	TGCTGTTATTGCCTTGCCTGAG	CTCCAACTCATCACTGTAGGTATCATC
Kcnq1	16535	GAAGCCCATTTCCATCATTGACCT	ACGCAGAGGACAACCATAGAGG
Kcnq1ot1	63830	GTGGTCGGCCTCATTTTGGATT	CACACTAAGGTGTACTAGACCGTAAC
Magel2	27385	CCAGTGCTGCTCAGGAGGAC	GCGTTTGCTCTCTCATCTAAGGG
Meg3	17263	CGAGGACTTCACGCACAACAC	CCACGCAGGATTCCAGATGATG
Mest	17294	CAACAATGACGGCAACCTGGT	TCTGAATTTCTTCCTTTGATTAATGTACTGTA
Mirg	100040724	CTAGCTGCTCTACCTGACTTTGTG	CATCTTTGTTGTCGGTTGTCGTAAG
Mkrn1-ps1	353327	CTTCTGGTGTTGGATCACTTGCT	TGCTCCTACAGTTGGAAAGTTTGG
Mkrn3	22652	CTCTGTTGTCTGCTGTTGCTTATTC	AAGATTGCCTCAGTAGCCTTTGAAA
Nap1l4	17955	GCCTTGTACCAGCCTCTATTTGAC	CACTGTGCCACGCTGACTCT
Nap1l5	58243	TGTGAGAACTGGACTTGAGACTGT	AAGAAACTGAAGAATTAAGCATTGAGAAGA
Ndn	17984	TGTGCTGTGCTAAACTTGTGAAATAC	TGCTCAGGTCTGCGTTGCT
Nesp	14683	AGTGCCTAGAGTACGATCAGGAC	ACTCAGGCTCGGTCTCAGAATC
Nespas	56802	ACAAGTCGGATCTGCCTAACCA	CAGCTAGGATCACATCGGGGTAT
Nnat	18111	GGCGTAGGCACCACATTCTG	GCTGTTCGATCTTCATGGTAGGAT
Osbpl5	79196	CTCGGTCCTTCCTCGGCAAG	CAGGTCTCCGTGGTAGTAGTAATCA
Peg10	170676	TGCTCTGATTACTGCCTGTATTCAC	CGTCACGAGCCAGCCTTCT
Peg12	27412	CCACACTTGAACATTTTATGACAGTTAA	ACCGCAAAAGATGAGATGGTCT
Peg13	353342	CTATTCGCCAATCATCGCACATAAC	CACACATCTCCTTGAACCCACTG
Peg3	18616	TCTGGAAGCCGACATTATGAG	ACGCACTTGTTCTTGGATGA
Phlda2	22113	TGGAGCACACCTCTAAGTACGT	CCAGCAGCTCTCCACCGT
Plagl1	22634	TGAAGTATTGTTTGTAATCACCAATAGAAA	CACAATCCTCTTGGGATACAAACTAA
Pon2	330260	ACCTTCCAAACTGCCACCTCAT	GAATGTCAATGTCCTCAGCTCCAG
Ppp1r9a	243725	CCGCTCGATGAACCTCTAGTCTT	GTGACGATTCCAAAGGCTGTATTAGA
Rasgrf1	19417	CAAGGTCACCGTGCCTCAGA	ATCATCACAATATAAGGAAGCGTCAGA
Rian	75745	CTTCATTAGTCTTGAGGTTTGAGATTCC	CAATCCACGGACATAAAGGCTAGAT
Rtl1	353326	CAGGAGTCAAGCGACAGTTCAA	TGAGTGGTTCCGACCCTTCC
Sgce	20392	GTGATGGAGTCCTGTATGGGTCT	GTAGGCAGTTATCTCAATAATAGTTGGTTT
Slc22a18	18400	AGTGCTGCCTGTATTCCTGTCA	AACATCACCAAGAAGAGTCCTGAAG
Slc22a2	20518	GACAGGTTTGGGCGGAAGTTC	AGATAGCATTGATGAGGATGGTGAC
Slc22a3	20519	GACTTGCTTCGTGATCGTGACA	TAATGATCCCGAGGGTGAAGAACA
Slc38a4	69354	ACTGTGGCAATACTCTCGCTCTA	ATCCAAATGCTTTCTCGCCCAAT
Snord116	64243	ACTGGTGGCTTGCTCCCTTT	GGACCTAGCACGACTACCTACTG
Snurf-Snrpn	84704	ACGCTTGGTTCTGAGGAGTGAT	CGTGCTGTTCAGTAGTTCTTCTCA
Tssc4	56844	CATTCCACCTCCGAGGCATGA	TGCACTCTCCAGACAATCAAAGATG
Ube3a	22215	CATCTCATACTTGCTTTAATGTCCTTTTA	TTGTTTACAGCATGCCAAATCC
Ube3a-ATS	22215	GGCAGATATAATACAGTGATTCCAGAAAC	TGTCTCTTAGGCAGTAGGCAGATAA
Usp29	57775	CCGTGAGCCGCCGTGAG	ACCCAAGTCCCAAGTTTCTATTTAGG
Zfp264	116812	AGGCACCAGCGAGTTCATAGT	GGTCTTCCCACACTCAATACTTCAA
Zim1	22776	GAGGCAGGAGTCAGCAGAAGT	TCCAGTGATGTTGTCTTAGAATTGTCT
Zim2	76637	GCAAGCATCTGACCCAAGTTACA	GGCAAAGTTTCTAATCCCTAAATCCTTATT
Zim3	116811	GCACGACTCCTGATCTGTGAAG	ATGACCTCAAACTCCTGATCTTTCG
Zrsr1	22183	TGAAGTTGCTGTCCAGGAAGGTA	TCGCCCGCTGCTAAGTTGT

## Sheet: Markers
Symbol	Gene ID	Forward Seq.	Reverse Seq.
Mki67	17345	TCCAGACTTCCACAGAGAC	TTCACCTTCATCCAGATTCAC	Proliferation
		AACTTGCCTCCTAATACACCACTG	GCCGTTCCTTGATGATTGTCTTG
Pcna	18538	GAAGCACCAAATCAAGAGAAAG	GCTCCACATCTAAGTCCATTAA
AdipoQ	11450	GAGAGTCCTGAGTATTATCC	CATTCTGTTATTGCTACCAT	Adipogenesis
Cebpa	12606	GCGTCTAAGATGAGGGAGTC	AAGTCTCTCGGTCTCAAGGA
Cebpd	12609	CACTGGACTGCGAGAGAAGC	AAAGTCTGTCGGAAATGTCT
Fabp4	11770	AGAGCATCATAACCCTAG	CGCCTTTCATAACACATT
Lep	16846	TGGTCCTATCTGTCTTATGTTC	AATGGTCTTGATGAGGGTTT
Lpl	16956	CCCAGCAAAGCATACAGGTG	TTACAGCGATTCTTTCTACAACTC
Plin1	103968	GGAGAGTAAGGATGTCAATG	GTAGGTCTTCTGGAAGCACT
Pparg	19016	TGCCAGTTTCGATCCGTAGAA	AATCAAGGTTAATGAAACCAGGGATAT
Slc2a4/Glut4	20528	CAGAAGGTGATTGAACAGAG	AGAAATGATGCCAATGAGAA
Myf5	17877	TCTATTTTCTCATAAAGTGGCAAGACA	AGCCCTGAAGCTGAAGGAAAG	Myogenesis
Myf6	17878	CTGGCATCTGTGAGCCCTAATC	AGCCAGCATTTGGAACATTCTT
Mylk2	228785	GCTATCATCTCCTGCTCTG	TTCTCTGCCTCTTCCTTCT
MyoD	17927	GATGGTGCCCCTGGTTCTT	AACGGCTTCGAAAGGACAGTT
Myog	17928	TCAGGCTGGGTGTGCATGT	GCCCCCTGCTACAGAAGTGAT
Pax3	18505	CACGACGGGAGGAGACTTG	CAGGGCGGACGAGTTTGG
Pax7	18509	CTCACATCCACCTTCTCTG	TCCACCTACACCCATAGC
Tnnt1	21955	TTGACCTGATGGAGAAGTTGAAG	GTGGCTGATGCGGTTGTAG
Tnnt3	21957	CCACCGCCACTATGTCTG	GGGTCTTGGTTTCTCCTCTG
Ccl2	20296	CCTTTGAATGTGAAGTTGACCCGTAAATC	CAGAAGTGCTTGAGGTGGTTGTGG	Inflammation
Ccl4	20303	CTCTCTCCTCTTGCTCGTG	AGGAAGTGGGAGGGTCAG
Ccl6	20305	GCCACAATAGAGCAATGAG	CCGTAGTTCTATGAATCTGAAG
Cd180	17079	TCTCTATCTCGGAAGCAACC	TAAGTTAAGGCTCAGATTAGTGG
Csf1r	12978	GCGATGTGTGAGCAATGG	GCGTTTCTTGTGGTCAGG
Csf3r	12986	GCCCTGATGTAGTCTCTC	TGGTAGCGAAGTTCACAC
Emrb1	13733	CTTGTGGTCCTAACTCAGTC	CAGTGGAAGAAGAGAAGCC
Mrc1	17533	TCTGTCATCCCTGTCTCTG	GTTGCCGTCTGAACTGAG
Msr1	20288	CATCACCAACGACCTCAG	ACCAGTTTGTCCAGTAAGC
