# Supplementary material for: A systems-level approach to parental genomic imprinting: the imprinted gene network includes extracellular matrix genes and regulates cell cycle exit and differentiation
Source: HighWire-hosted journal article supplement (doi:10.1101/gr.175919.114), 2015-01-22
Supplement: Table_S22.xlsx [file Table_S22.xlsx]

## Sheet: Table S22
GO.ID	GO:0061041	GO:0007269	GO:0090090	GO:0071478	GO:0072091	GO:0009267	GO:0008652	GO:0042698	GO:0006665	GO:0050707	GO:0046425	GO:0090002	GO:0031056	GO:0007368	GO:0009266	GO:0016458	GO:0032507	GO:0007093	GO:0009636	GO:0061136	GO:0055088	GO:0043624	GO:0045807	GO:0014020	GO:0045333	GO:0016571	GO:0040014	GO:0050773	GO:0009582	GO:0042552	GO:0033135	GO:0007623	GO:0031345	GO:0019722	GO:0048813	GO:0030814	GO:0043901	GO:0009581	GO:0071229	GO:0051899	GO:0050921	GO:0061572	GO:0051017	GO:0046474	GO:0010976	GO:0008344	GO:0014902	GO:0008361	GO:0007229
GO Term	regulation of wound healing	neurotransmitter secretion	negative regulation of canonical Wnt signaling pathway	cellular response to radiation	regulation of stem cell proliferation	cellular response to starvation	cellular amino acid biosynthetic process	ovulation cycle	sphingolipid metabolic process	regulation of cytokine secretion	regulation of JAK-STAT cascade	establishment of protein localization to plasma membrane	regulation of histone modification	determination of left/right symmetry	response to temperature stimulus	gene silencing	maintenance of protein location in cell	mitotic cell cycle checkpoint	response to toxic substance	regulation of proteasomal protein catabolic process	lipid homeostasis	cellular protein complex disassembly	positive regulation of endocytosis	primary neural tube formation	cellular respiration	histone methylation	regulation of multicellular organism growth	regulation of dendrite development	detection of abiotic stimulus	myelination	regulation of peptidyl-serine phosphorylation	circadian rhythm	negative regulation of cell projection organization	calcium-mediated signaling	dendrite morphogenesis	regulation of cAMP metabolic process	negative regulation of multi-organism process	detection of external stimulus	cellular response to acid	membrane depolarization	positive regulation of chemotaxis	actin filament bundle organization	actin filament bundle assembly	glycerophospholipid biosynthetic process	positive regulation of neuron projection development	adult locomotory behavior	myotube differentiation	regulation of cell size	integrin-mediated signaling pathway
GO Level	6	9	10	5	6	7	9	5	7	10	8	8	10	8	4	8	6	10	4	11	6	7	8	11	6	10	5	13	4	10	11	3	6	8	13	12	5	4	5	5	7	8	9	8	13	6	8	6	7
No. of annotated genes	85	85	85	89	89	89	89	91	93	99	105	86	88	89	95	119	88	88	89	89	90	90	91	91	92	94	96	96	97	104	104	92	92	93	93	94	95	98	173	90	90	91	91	92	94	95	95	96	96
No. of annotated genes with data in COXPRESdb	85	85	85	85	85	85	85	85	85	85	85	86	86	86	86	86	87	87	87	87	87	87	87	87	87	87	87	87	87	87	87	88	88	88	88	88	88	88	88	89	89	89	89	89	89	89	89	89	89
GeneID_1	235505	382018	433759	245000	384783	319801	330817	268903	433323	383619	319146	328778	329559	382089	277328	433702	433667	381979	319955	381629	353187	276770	380793	330409	407785	383491	320790	545156	329064	338521	606496	387285	380711	330814	270190	606496	433759	329064	240843	399548	227541	399591	399591	433931	380713	320790	329828	404710	378460
GeneID_2	225152	381979	407821	239364	329559	245860	276770	242523	338521	269855	237310	269116	217031	319757	270190	330890	338467	269582	271844	338352	338320	238276	320832	269593	380601	381813	269275	277360	328789	269116	333433	353187	259277	244579	245537	432530	270151	328789	240442	333433	117149	320472	320472	329777	330863	243914	319594	328572	353188
GeneID_3	224794	320405	328949	235323	319757	242557	270685	236899	320910	242122	230514	234678	216805	277939	245688	320595	320191	235661	266690	270627	238055	237891	227541	252973	320720	329559	236266	269397	277328	259277	329679	272322	235106	243725	243961	381853	246730	277328	236900	246317	105855	243961	243961	327942	320840	240590	259300	320563	330119
GeneID_4	216350	242662	235542	234371	216858	233833	269378	229357	268656	234695	228812	233977	214855	269878	236193	239528	319565	234736	232333	269523	237636	228421	225164	244058	269951	238247	232339	245537	270190	245880	319146	269378	231532	238161	238276	240888	246727	270190	224826	245537	101540	242687	242687	320655	235180	239250	237611	243743	320910
GeneID_5	211673	241770	228357	224008	214150	229722	268782	228980	241447	230979	219103	230972	214384	246102	231507	236511	233833	234664	225997	246133	236266	227753	218038	235626	243996	235626	231507	243961	244646	243914	238871	269254	231474	236266	237868	238276	231655	244646	215378	243961	83430	242553	242553	276846	234593	233878	232174	230796	252866
GeneID_6	109821	235415	226154	213990	114142	225326	242726	227631	241230	216799	217303	226849	214162	245866	228139	234852	229841	234069	218914	228775	231103	225363	216869	234366	235339	234135	227731	238276	243923	234094	232560	246313	229285	217124	233489	238161	230908	243923	208922	235281	71660	236266	236266	270084	227541	232975	231602	229285	241226
GeneID_7	107589	225644	213326	212541	108655	225131	238505	226090	230379	170823	216233	226791	109689	244585	226101	234594	223697	231600	217310	228769	230784	213556	215114	232906	227731	233904	224796	237868	234839	230822	232430	232087	228357	216749	232560	230857	228607	234839	108155	216856	68992	235041	235041	269180	225849	227331	227721	225348	240322
GeneID_8	107351	215449	140577	170770	99982	223453	236539	224045	230101	170779	208266	226744	109331	237222	224045	233833	216440	229841	214084	225896	228859	211323	213326	230824	227197	232811	216749	232560	233649	229715	231474	229599	210108	215999	231672	210044	224762	233649	107581	212989	68606	234857	234857	241062	223255	224671	227325	171207	238406
GeneID_9	105722	192167	107746	109685	76365	216742	234814	217715	228677	170744	107566	217893	108155	226162	217715	232791	212073	229543	118454	225131	218203	208691	192167	216285	216805	231051	216233	231672	231252	225608	227120	224671	171207	210198	228662	207728	217069	231252	105349	209488	66166	234686	234686	239827	216739	216869	214384	104394	234421
GeneID_10	94175	116838	106042	93759	75725	213948	232087	216869	227102	140497	93672	109676	107951	225164	216869	231464	209361	227331	107146	224997	217166	208158	110279	207304	209692	226830	208188	228550	225004	224045	224860	217732	170835	208727	228550	140498	117149	225004	98496	192167	56066	234094	234094	234779	216166	216856	210719	99152	232906
GeneID_11	94045	116837	97064	80750	73703	108079	212647	110355	223753	107515	83430	107975	107260	213575	209354	230594	192176	224023	104184	224727	108079	171580	109934	170823	170718	225888	193034	227541	216869	218442	216869	217369	140571	114229	228357	112405	112419	216869	98402	110834	55985	233977	233977	234515	109905	213827	208727	97998	225341
GeneID_12	74318	110834	93960	77065	67087	105787	211666	109689	216892	107221	74019	106572	104263	207607	208111	224826	109552	216795	104158	223870	107476	110380	109689	140570	78920	214572	109241	217692	212541	217715	216742	217166	121021	109676	223254	108073	107373	212541	94216	108013	50930	233877	233877	233575	107765	170719	171170	83431	223838
GeneID_13	72828	109905	83675	76867	66993	103988	210009	101476	208449	102657	72674	106522	104103	171567	193740	217351	108911	208628	76507	217410	105787	109242	105855	107586	78830	214162	102774	210108	192140	192119	215748	213311	107351	77799	217692	104443	94091	192140	83702	83814	27226	223864	223864	231293	107746	140477	117606	74370	218952
GeneID_14	72054	109880	76365	74996	66725	101867	209027	93759	192654	94185	66406	104215	101540	171395	193116	214150	107566	208583	75219	211770	103988	108853	104836	106042	76668	214133	102247	208922	171395	118446	192656	195646	94175	77647	195208	104111	93679	171395	83409	77116	24047	218194	218194	230801	103199	109294	106042	74132	192897
GeneID_15	71753	108124	74499	74041	30838	100855	208691	93757	171168	94092	60505	100017	101206	110350	193034	213988	106021	109019	74104	170930	100102	108124	104015	105782	75619	213464	80297	192167	171209	106369	170835	110312	76089	76469	110834	104110	83383	171209	74370	76055	22418	114774	114774	228812	101513	98685	103806	71955	110829
GeneID_16	67996	108030	74256	73181	22601	100102	207182	75410	108105	81897	58523	98496	99982	107586	171382	213236	105785	108989	72821	170823	100017	104015	100102	102774	75597	213389	74493	110834	140476	103199	110157	108079	74498	71326	109294	99296	80876	140476	73614	72961	22341	114229	114229	225651	83431	98660	79362	71929	110751
GeneID_17	67916	105782	74025	72931	22418	93759	109900	74434	104725	81799	56708	93835	83925	93840	171209	192119	103268	107047	68943	108143	93759	80986	100017	100169	74450	208266	74386	107995	114230	94185	109880	105787	74132	71132	99152	84111	80861	114230	71835	72821	22339	109880	109880	225326	77480	93688	79221	69737	109700
GeneID_18	58992	104015	73739	71175	22413	78926	108645	60534	100340	81600	54394	80297	81703	76779	110616	116848	102774	104418	68312	106042	81799	78926	94176	99683	73181	140858	73094	99152	110911	83964	109689	104318	68585	70261	98733	83397	80287	110911	71785	71653	21828	109711	109711	214253	76089	83429	77578	68585	108911
GeneID_19	56868	100226	72345	69076	22411	77040	108156	57264	81535	77125	23921	76854	76246	74025	110312	107435	101994	100683	66880	105418	77371	78798	83814	99377	72900	116848	71175	98733	110855	77116	101540	103583	66725	68212	93691	77037	78781	110855	71461	63959	21825	109689	109689	212862	74187	80297	74777	68576	104099
GeneID_20	56745	99738	72293	68539	22341	76507	108147	56484	77626	66824	21939	76688	75410	73916	109359	104625	83560	94315	57432	104318	74591	76707	76686	93840	71804	110147	71111	76484	110789	69597	83946	99586	64294	66437	93686	76854	74735	110789	70572	60597	21803	109624	109624	210992	74143	78405	71999	67605	100169
GeneID_21	56373	94245	72125	68142	22339	76267	108037	56436	76943	66214	21937	76686	75302	73293	108989	101867	77053	83560	56774	94232	74011	76499	73178	93760	71701	109331	69597	76108	109689	64930	80297	98432	63873	56743	77480	74191	74019	109689	69188	59032	20583	108100	108100	107650	71461	76192	69726	66096	67733
GeneID_22	56193	94090	71890	66467	22326	74781	107885	55993	76893	60533	20311	74205	74016	68897	108067	101543	76895	77011	56312	94190	71111	74392	73094	81896	70673	108155	67378	76089	107751	59057	74747	94275	56753	56398	76484	74025	69807	107751	68576	58991	20563	104027	104027	102247	70620	74244	69564	65086	57257
GeneID_23	27973	83762	70433	60599	22061	74244	107869	52020	74442	56807	20304	72993	73703	68270	107751	98985	76707	76454	50500	93739	70310	74187	69165	79464	70383	107823	67013	74498	107477	56217	71890	79362	56637	54720	76108	56744	69550	107477	68441	58234	20356	80880	80880	99712	69601	70430	66860	64930	56506
GeneID_24	22417	76787	70122	60530	22059	74137	107272	30953	71949	56715	19255	72293	73473	68146	105787	98558	76499	75430	27973	80750	69836	73804	68566	76779	69577	104263	64704	74143	76645	53897	69726	66704	53972	54446	76089	54598	69097	76645	67800	57785	20343	72088	72088	84095	68169	67269	66139	56717	56193
GeneID_25	22349	71709	69601	57741	21907	73158	107239	26972	70750	56620	19229	71648	73086	67685	101739	94223	76464	71007	26570	77125	69071	73470	67979	74143	69089	104103	59030	74117	73660	53321	68606	58991	52822	54140	75409	54409	68713	73660	67579	57320	20315	71774	71774	78928	64436	64704	57810	56193	53618
GeneID_26	21898	67847	68588	56349	21813	72027	104923	26927	70059	56619	19109	68328	71458	67661	83945	93762	75296	70799	26417	72293	68453	72650	66824	73916	68263	103784	56808	70237	59030	50913	67384	58182	29869	53902	74498	54393	68350	59030	66508	56772	20312	69710	69710	75320	64297	57754	57784	53869	27027
GeneID_27	21825	53620	66042	52033	21803	72002	102115	26423	69923	55991	18613	67830	71241	66248	74100	93759	74360	69917	26413	71999	68018	68572	64009	71461	68202	99982	50769	69601	57811	50849	67299	56637	27369	53901	74117	51801	67778	57811	66354	22629	20306	68606	68606	74769	52163	57320	56717	29869	26554
GeneID_28	21682	53331	59036	50754	21417	71999	100678	26362	68952	54725	18128	67378	71175	57246	71145	83701	72415	68592	23871	71890	67963	68041	60595	70300	68197	99890	30052	66725	54652	24088	58805	56335	26921	52589	70237	22355	67525	54652	66096	20617	20304	68166	68166	74596	50791	56747	56642	27279	23991
GeneID_29	21672	50873	58231	30044	21386	70381	71522	22788	68865	54698	18099	67268	70790	56334	69698	83561	72195	68193	22785	71816	67800	66711	56644	68588	68015	94246	26383	66515	53871	23966	56637	53404	23991	30937	66725	22353	66949	53871	57816	20370	20303	67384	67384	74205	23999	50873	56637	26889	22324
GeneID_30	20963	27204	56811	26420	21380	68728	71275	22764	68018	54131	18016	66629	70103	54562	69253	83557	72124	68014	22784	71492	67470	65973	52906	65100	67914	84505	22778	64009	30952	22239	29815	50789	23924	27061	66515	22226	66854	30952	56876	20271	20301	66214	66214	72084	23969	26889	56190	23999	22177
GeneID_31	20720	27062	56612	26416	20682	68118	70396	22339	67630	53791	18012	66352	68911	52906	67669	78893	70549	67941	22782	71240	67451	65970	50791	64930	67834	77683	22095	58234	30044	22041	24064	50501	22629	26557	64009	21858	66597	30044	56710	20266	20296	65970	65970	68563	23965	22771	54720	22418	21682
GeneID_32	20670	26875	56274	24086	20674	67841	69051	22215	67260	26438	17096	59020	68790	51938	66917	76850	70297	66991	22590	70620	66508	63873	30948	59024	67680	77630	20856	56876	24115	21819	23963	30044	22418	23991	60597	20608	66141	24115	56692	20264	20254	64930	64930	67556	22418	22295	54631	22416	20963
GeneID_33	20344	22782	54612	24013	20672	67727	68977	22174	66844	24088	16878	57816	67367	24069	64704	76793	69697	66983	21743	69601	66113	58522	23892	58198	67530	77305	20851	56637	24013	21803	23897	27419	22416	23964	59036	19227	58185	24013	54635	20238	19271	60595	60595	67512	22359	22223	30963	22415	20361
GeneID_34	19695	22433	50781	22632	20671	67579	67873	21869	66612	23845	16846	57785	66354	23863	63873	75410	68379	66591	20600	68098	57875	57028	22416	57265	67472	76246	20850	56508	22157	21416	22418	27373	22415	22637	58234	19226	57444	22157	27273	19699	19229	58234	58234	67469	22240	22095	26556	22368	19303
GeneID_35	19694	22421	50523	22601	20666	67526	67870	20899	66190	22418	16818	57440	66317	22773	60599	75284	68137	66131	20522	67903	52014	56431	22370	56334	67264	75410	20848	56376	22141	21367	22416	27220	22352	21926	56876	19222	56417	22141	23999	19211	18787	56753	56753	67420	21844	22044	26416	22362	19247
GeneID_36	19271	22343	29806	22596	20665	67474	67092	20851	66183	22164	16590	57437	58521	22418	58233	74691	67052	57913	20512	67685	30924	56273	22339	54612	66972	75302	20751	56013	21926	20655	22339	24111	22241	21785	56637	18764	56213	21926	22222	19055	18760	56717	56717	67292	21770	21916	23956	22339	19229
GeneID_37	19128	22342	27041	22427	20583	66840	66194	20850	58994	22163	16452	56460	57741	22416	57138	74068	66977	56190	20304	67296	28254	56193	22157	54006	66945	74729	20655	54633	21906	20481	22226	21934	22240	20963	56376	18483	54131	21906	22164	18762	18750	56226	56226	66826	20720	21367	22410	22241	18823
GeneID_38	19123	22319	26564	22062	20471	66734	64918	20655	57319	22160	16392	56374	56613	21821	56445	72634	66913	56150	20303	67141	27409	50875	22141	50884	66925	74322	20437	53972	21393	20183	21926	21853	21909	20698	56013	18162	50701	21393	21926	18439	18596	56193	56193	66461	20698	20618	22408	22226	18103
GeneID_39	19091	22318	26416	22061	20429	66615	56695	20397	56632	21942	16362	56334	55982	21815	56373	72322	66629	54601	20274	66725	26565	23999	20617	50768	66826	74016	20397	53872	20720	20182	21803	21410	21838	20541	54652	18103	24088	20720	21417	18438	18591	54418	54418	66459	20459	20617	21833	22084	16797
GeneID_40	18816	22317	23892	22059	20423	66597	56454	18783	56442	21926	16195	56217	26992	21386	30052	72068	66086	52696	20273	66245	26424	23991	20390	30841	66576	73703	20239	52163	20674	20181	21687	20893	20745	20336	54633	18015	24014	20674	20899	18390	18213	50873	50873	66268	20370	20370	21803	22062	16776
GeneID_41	18815	22249	23805	20877	20204	57875	56369	18667	56386	21899	16194	56212	26419	21385	29818	71981	64009	50883	20266	59029	22282	22351	20387	27428	66494	73473	20185	23969	20496	19411	20617	20669	20563	20303	53972	17329	23947	20496	20682	18189	18205	50768	50768	56703	20311	20315	21386	20563	16423
GeneID_42	18792	20983	22419	20583	19716	56717	56189	18595	54447	21898	16193	56089	26417	21380	26457	71148	63856	30949	19879	59025	22278	22349	20379	24136	66416	73251	19377	22629	20147	19401	20319	20473	20562	20191	53883	17203	22670	20147	20469	18053	18186	50490	50490	56176	20266	20273	21380	20562	16421
GeneID_43	18787	20979	22418	20377	19264	56367	27388	18291	54325	21897	16191	54214	24074	20997	26419	69125	56327	27354	19106	56812	22260	22003	20339	24069	66152	71974	19305	22359	20132	19317	19062	20185	20370	19733	53872	17201	22064	20132	20459	17295	17295	26554	26554	55981	20257	20265	20682	20361	16420
GeneID_44	18761	20965	22417	20319	19106	56295	27364	18168	53897	20963	16189	53620	22339	20807	26369	68092	56320	26951	19053	56637	22259	20878	20296	22772	66072	71458	19247	21909	19674	19211	18760	19885	20356	19229	50932	17200	22038	19674	20194	17257	17127	26401	26401	55980	19713	20238	20681	20356	16419
GeneID_45	18754	20964	22411	20174	18933	56208	27053	18127	53357	20371	16183	53330	22226	20671	22368	67276	56273	24061	18979	56469	20788	20877	19288	22418	66052	71241	19206	21907	19662	18992	18706	19883	20355	19220	22629	17199	21926	19662	20186	17131	16963	23789	23789	55979	19699	19063	20661	20355	16418
GeneID_46	18753	20910	21886	20147	18590	55978	26457	18072	50935	20312	16168	52028	22210	20423	21833	66715	54401	22591	18783	56468	20778	20742	19261	22323	64384	70779	19141	20620	18766	18991	18645	19653	20350	19122	21909	16867	21849	18766	20182	16511	16803	22417	22417	54673	19229	18516	20481	20354	16416
GeneID_47	18750	20909	21416	19888	18508	54636	23887	17390	50877	20302	16163	50918	22160	19726	21804	63830	54141	22062	18227	56424	20185	20741	19128	22289	56857	69726	19035	20393	18764	18858	18479	19215	20346	19055	21907	15945	21357	18764	19713	16476	16542	22411	22411	53357	18760	18472	20429	20350	16415
GeneID_48	18595	20907	20682	19367	18420	54197	22038	17311	26938	19720	16160	23991	22083	19664	21426	58184	53380	22061	17750	56207	19302	20740	19063	22160	56451	69188	18992	20370	18763	18823	18413	19211	20257	18821	20393	15551	20821	18763	19401	15171	16398	22350	22350	52858	18759	18419	20423	20346	16414
GeneID_49	18591	20743	20674	19362	18128	52639	21926	17300	26889	19219	16159	23969	22059	19378	21336	57749	51944	22059	17748	56150	18971	20739	18806	22158	56412	68911	18736	20354	18587	18711	18213	19092	20187	18438	20354	14823	20817	18587	19229	14813	16189	22349	22349	30955	18442	18386	20190	20315	16413
GeneID_50	18590	20698	20671	19361	18109	51897	20512	16867	23956	19073	16150	22417	21803	19164	20840	57746	50930	21974	17260	53380	18145	20595	18787	22084	52637	68790	18706	19876	18582	18377	18205	19091	19270	18241	20346	14748	20815	18582	19217	14812	16176	22240	22240	27392	18213	18227	19055	20187	16412
GeneID_51	18024	20618	20665	19355	18049	27273	20425	16848	23801	18762	16000	22319	21652	18764	20655	56463	50868	21973	17196	53323	17777	20393	18693	22034	50799	67956	18166	19699	18545	18205	17319	19017	19268	18212	19876	14744	20568	18545	19214	14811	16170	21927	21927	27388	18212	18216	18795	19713	16411
GeneID_52	17927	20617	20583	19272	18044	27220	19210	16846	22239	18439	15978	22318	21412	18741	20480	56417	26934	21803	16819	53312	17101	20356	18205	21815	22273	67367	18159	19329	18211	18053	17295	18646	19211	18013	19699	14708	20304	18211	18764	14810	16149	21336	21336	26457	18103	18203	18741	19211	16410
GeneID_53	17869	20616	20439	18708	18028	27103	19125	16590	22234	17319	15977	20955	20926	18553	20449	52846	26423	21749	16452	52033	16973	20259	18173	21677	22226	66423	16846	19268	18053	18015	17131	18628	19164	17967	19353	14694	20303	18053	18595	14809	15945	21333	21333	24057	18102	18145	18708	18846	16409
GeneID_54	17127	20615	20423	18545	18015	27053	18602	16542	20773	17096	15974	20742	20787	18129	20296	52463	24069	20677	16451	27373	16956	20257	17886	21418	21379	66354	15499	19266	17869	17988	16878	18627	19089	17341	19268	14680	20249	17869	18591	14806	15507	20971	20971	22788	18010	18049	18209	18472	16408
GeneID_55	17096	20614	20379	17999	17869	22427	18601	16323	20698	17082	15972	20411	20617	18128	19652	30951	22051	20620	15901	24086	16891	19888	17304	20997	20917	66317	15364	19211	17252	17937	16798	18626	18858	16867	19266	14602	19824	17252	18011	14805	15289	20807	20807	22038	17319	17762	18128	18377	16407
GeneID_56	16621	19339	20378	17380	17075	22320	18600	16322	20598	16334	15969	20194	20583	18119	18770	29806	21894	20104	15567	22433	16835	19704	17289	20481	20916	66310	15183	18483	17035	17936	16193	18143	18846	16797	19211	14601	19720	17035	17392	14804	15139	20411	20411	19210	17295	17257	18091	18213	16404
GeneID_57	15461	19164	20377	17364	16998	22241	18599	14566	20597	16193	15968	19376	20481	18091	18570	23992	21833	19367	15552	22410	16816	19684	17195	20377	20656	64707	14732	18481	16590	17918	16156	18030	18753	16728	18481	14526	19712	16590	17390	14739	14747	20410	20410	18805	17096	16531	18007	18208	16403
GeneID_58	15442	19063	20319	17252	16974	22059	18478	14366	20452	16190	15967	19206	20466	17684	18413	22695	21335	19356	15551	22225	16334	19230	17194	20353	20617	59035	14683	18223	16480	17475	15978	17773	18645	16542	18223	14429	19130	16480	17260	14694	14745	20194	20194	18784	17005	16513	17938	18186	16402
GeneID_59	15376	18645	19277	15587	16973	21821	18416	14309	20451	16175	15965	19092	20371	17292	18211	22290	19645	19290	15185	22218	15451	18008	16568	20319	20512	55982	14602	18222	16398	17196	15977	16531	18472	16408	18222	14428	19106	16398	17096	14630	14456	19229	19229	18708	16975	15438	17928	18049	16401
GeneID_60	15357	18439	18128	15574	16542	20924	17769	14308	20450	16153	15964	19062	20185	17260	18125	22210	18854	18854	14917	20878	15450	17997	16423	20115	19017	52690	14601	18212	16173	17153	15974	16193	18208	16000	18174	14427	19062	16173	17005	14629	14268	19219	19219	18707	16878	15430	17927	17762	16400
GeneID_61	15200	18212	18121	15364	16367	20787	17768	14178	20449	15978	15962	18777	18854	17127	18053	21429	18764	18817	14866	20620	15378	17957	16412	19878	18747	52615	14600	18011	15566	16513	15972	15902	18189	15559	17999	13617	19043	15566	14811	14613	14205	19062	19062	18706	16412	15376	17886	17755	16399
GeneID_62	14729	18191	18091	14784	16147	20525	14854	13983	20447	15587	15468	18759	18760	17126	17035	21357	18763	17829	14863	20423	14732	17755	16398	19335	18598	27374	14599	17999	15451	16202	15969	15567	18186	14816	17344	13614	18988	15451	13837	14609	14165	18826	18826	18705	15566	15258	17691	17751	16398
GeneID_63	14726	18190	17292	14686	15978	19338	14719	13982	20445	15559	15458	18720	18509	16974	16179	20937	18717	17685	14799	19359	14718	17754	16019	19206	18597	23808	14563	17344	14913	15978	15968	15566	18053	14767	17295	13491	18854	15227	13806	14199	14068	18816	18816	18704	15114	15211	17295	16885	16202
GeneID_64	14723	18189	16842	14685	15364	19335	14718	13874	20397	15139	15378	18607	18507	16814	16175	20679	18536	17535	14775	19358	14607	17318	16017	18643	18432	22083	14562	17295	14823	15904	15967	15183	17751	14764	16975	13490	18843	14913	13653	14167	14063	18761	18761	18701	14824	14814	17260	16202	14389
GeneID_65	14234	18049	16798	14462	15289	19324	14661	13866	19156	14732	15364	18483	18125	16568	15559	20586	18080	17246	14400	19211	14385	16800	15387	18505	18293	21652	14431	16975	14812	15212	15965	14601	16852	14747	16202	13489	18521	14823	13649	13614	13617	18645	18645	18700	14360	14810	16334	16197	14219
GeneID_66	14173	18015	16392	14375	15251	19164	14660	13667	19012	14462	15239	18189	17954	16147	15551	20466	18036	17193	14102	19192	14377	16765	14734	18121	18021	20937	14381	16202	14699	15211	15964	13864	16412	14226	15529	13488	17874	14812	13619	13491	13616	18643	18643	18618	14182	14658	16202	15519	14191
GeneID_67	14127	17957	16348	13712	15228	18693	14651	13649	18753	14456	15208	16776	17863	15251	15525	19653	18035	17120	13850	19165	14186	15550	14461	18119	17993	20926	14297	16183	14688	15208	15962	13548	16332	14125	15452	12922	17858	14699	13436	13400	13615	18479	18479	18591	14159	14654	16009	15516	14127
GeneID_68	14068	16504	15182	13653	15227	18475	14645	13615	18439	14191	15205	16668	17829	15227	15502	19652	18005	15937	13849	19164	13850	15185	14456	17684	17869	20230	14239	15529	14686	14912	15163	13490	16169	13829	14810	12921	17523	14688	13435	13385	13614	18016	18016	18590	14025	14607	16000	14297	14083
GeneID_69	14063	15893	14797	13605	15184	18432	14630	13404	18436	14063	15163	16573	17765	15223	15499	18999	16798	15574	13804	18817	13660	14852	14131	16974	17449	18509	14183	14824	14685	14712	14526	13489	15182	13666	14360	12918	17195	14686	13433	12789	13609	17912	17912	16816	13837	14297	15903	14268	13829
GeneID_70	14062	15560	14734	13197	14634	18145	14629	12426	17939	14062	14600	16553	17703	15111	14629	18983	16480	15461	13195	18763	13350	14489	14130	16911	17448	18507	13490	14815	14610	14360	14456	13488	14745	13615	13845	12766	17194	14685	12877	12788	13508	17127	17127	16592	13803	14169	15184	14168	13731
GeneID_71	14061	15171	14634	12955	14451	17966	14598	12394	17761	12978	14184	16480	17283	15110	14164	18676	14934	15364	13107	18747	13122	14168	14129	16870	17257	18193	13489	14810	14539	14184	13829	13211	14581	13614	13844	12311	17002	14610	12843	12568	12913	16885	16885	16475	13728	14167	14775	14025	13526
GeneID_72	13829	14823	14632	12925	14183	17927	14528	12167	16590	12775	14062	14694	17257	14609	13864	18458	14828	13924	13078	17846	12484	14063	14127	15251	15929	17863	13383	14745	14360	13871	13405	13207	14580	13491	13839	12310	16992	14539	12842	12424	12775	16413	16413	16332	13542	13860	13660	13614	13524
GeneID_73	12491	14809	14368	12753	14182	16476	14450	12159	16007	12774	13869	14456	16878	14463	13667	17454	14809	13000	13076	17246	12391	14026	14083	14534	15926	17765	13162	14025	14151	13866	13380	13170	14567	13488	13838	11998	16803	14360	12833	12391	12773	14744	14744	15560	13405	13838	13549	13508	13522
GeneID_74	12490	13616	14362	12649	14180	15377	14431	12155	15212	12683	13131	13836	16468	14179	13371	17257	14084	12995	12925	17131	12389	13860	14063	14368	14555	17283	13046	13838	13864	13823	12985	13123	14168	13405	13636	11803	16476	14151	12832	12389	12772	14457	14457	15559	13176	13643	13405	12912	13132
GeneID_75	12389	13542	13653	12575	13489	15185	14415	12048	15211	12490	12981	13383	14897	14165	13211	17192	13823	12905	12799	14775	11890	13829	13489	14365	14533	17257	12977	13636	13603	13667	12540	12953	14083	13400	13542	11556	16410	13864	12826	12362	12770	14219	14219	14755	12944	13491	13400	12774	12927
GeneID_76	12361	13491	13380	12530	13190	14828	14287	12043	14667	12475	12978	12988	14582	14106	12564	16535	13605	12579	12576	14694	11816	12632	13132	14362	14297	16468	12912	12944	13409	13666	12505	12952	14026	12774	13508	11555	16396	13603	12825	12300	12768	14086	14086	14731	12808	13489	13198	12631	12825
GeneID_77	12335	13447	13198	12371	12667	14456	13361	12028	14466	12363	12931	12550	14462	13805	12490	16475	13138	12575	12265	14673	11814	12631	12775	13800	14194	15469	12425	12808	13009	13654	12389	12912	14025	12767	13385	11554	16201	13409	12703	12291	12766	14026	14026	14178	12805	13488	12508	12569	12385
GeneID_78	12306	12890	13132	12144	12484	13033	12715	11705	14421	12362	12803	12391	14461	13590	12425	15201	12913	12534	12043	14629	11813	12345	12491	13544	13382	15468	12164	12704	12814	13138	12064	12854	13865	12766	13193	11551	16184	13009	12608	12289	12765	13860	13860	14173	12803	13131	12391	12568	11848
GeneID_79	12258	12889	12558	12048	12387	12846	12411	11622	14420	12231	12703	12306	14245	13411	12372	15182	12540	12450	12028	14198	11808	12344	12475	13543	13077	14582	12043	12569	12789	12767	12062	12753	13844	12554	13175	11541	16160	12814	12550	12286	12554	13835	13835	14077	12801	13014	12390	12561	11502
GeneID_80	11905	12614	12550	12035	12385	12752	12116	11606	12916	11807	12569	12215	13626	13388	12310	14000	12504	12443	12018	13650	11807	12343	12391	13542	12974	14462	12007	12568	12788	12741	12043	12362	13838	12525	12704	11540	16153	12789	12334	12257	12374	13829	13829	13481	12484	12799	12362	12421	11501
GeneID_81	11818	12322	12389	12028	12316	12421	12036	11600	12752	11806	12568	12048	13436	12627	11606	13436	12389	12366	11977	13542	11806	12340	12389	12808	12850	14056	11990	12323	12310	12558	12028	12234	13636	12504	12569	11535	15978	12788	12306	12064	12317	13717	13717	13480	12396	12661	12335	12391	11500
GeneID_82	11816	12287	12388	12018	12166	12123	12035	11576	12613	11793	12389	11845	13433	12020	11556	13435	12387	12235	11898	13132	11770	12332	12317	12631	12359	14055	11820	12162	12298	12527	12018	11865	13132	12501	12568	11517	15977	12310	12048	11684	12267	13609	13609	13026	12323	12647	12334	11941	11499
GeneID_83	11747	12286	12006	11920	12159	12043	11898	11516	12028	11688	11677	11835	13018	12005	11555	13433	12237	12048	11864	12795	11554	11827	12266	12614	12064	13626	11816	12160	12057	12387	11998	11657	13131	12484	12386	11516	15900	12298	11827	11555	12261	12540	12540	12660	12162	12298	12226	11858	11498
GeneID_84	11684	11540	12005	11852	12064	11793	11720	11504	11686	11609	11607	11735	13016	11481	11554	12566	12190	12035	11863	12234	11430	11789	12121	12159	12028	13436	11606	11848	11994	11990	11836	11540	12774	12373	12323	11515	15364	12057	11826	11540	11876	11856	11856	12651	12160	12288	12180	11855	11497
GeneID_85	11551	11419	11789	11826	11855	11657	11611	11441	11605	11607	11606	11733	12649	11480	11539	11810	12121	11920	11754	12005	11425	11567	11625	12042	11564	13433	11556	11845	11941	11652	11652	11539	12704	12372	12286	11513	13035	11994	11518	11539	11652	11848	11848	12520	11908	12286	12159	11816	11496
[truncated: 1 more columns]
