# Supplementary material for: A systems-level approach to parental genomic imprinting: the imprinted gene network includes extracellular matrix genes and regulates cell cycle exit and differentiation
Source: HighWire-hosted journal article supplement (doi:10.1101/gr.175919.114), 2015-01-22
Supplement: Table_S23.xlsx [file Table_S23.xlsx]

## Sheet: Table S23
	Size of the Largest Connected Component				Average Degree				Average Mutual Rank
MRmax	Igs	p-value(IG)	BPs	p-value(BP)	Igs	p-value(IG)	BPs	p-value(BP)	Igs	p-value(IG)	BPs	p-value(BP)
250	46	0	42.28	0	1.27059	0	1.18847	0	113.342	0.061	114.104	0.067
500	61	0.013	66.66	0.002	2.05882	0	2.07835	0	216.962	0.003	227.763	0.023
750	72	0.149	77.04	0.019	2.62353	0	2.89271	0	302.232	0	341.78	0.012
1000	77	0.411	80.94	0.163	3.32941	0	3.676	0	422.119	0	457.105	0.011
1200	84	0.021	82.44	0.216	4	0	4.26635	0	535.692	0.003	547.613	0.005
1250	85	0.039	82.58	0.283	4.12941	0	4.41176	0	557.202	0.004	570.002	0.007
1500	85	0.16	83.84	0.424	4.71765	0	5.14988	0	660.851	0.001	686.636	0.006
1750	85	0.324	84.3	0.324	5.41176	0	5.85812	0	784.543	0.002	801.415	0.004
2000	85	0.509	84.6	0.509	5.97647	0	6.52894	0	887.45	0	913.127	0
