# Supplementary material for: A systems-level approach to parental genomic imprinting: the imprinted gene network includes extracellular matrix genes and regulates cell cycle exit and differentiation
Source: HighWire-hosted journal article supplement (doi:10.1101/gr.175919.114), 2015-01-22
Supplement: Table_S24.xlsx [file Table_S24.xlsx]

## Sheet: Table S24
GO.ID	GO:0031669	GO:0044106	GO:0042107	GO:0046425	GO:0030218	GO:0030808	GO:0048593	GO:0019882	GO:0000910	GO:0009411	GO:0009895	GO:0044724	GO:0019233	GO:0050680	GO:0031638	GO:0007218	GO:0022898	GO:0008360	GO:0008630	GO:0006275	GO:0042552	GO:1900371	GO:0033135	GO:0002526	GO:0007224	GO:0048565	GO:0008277	GO:0035725	GO:0043280	GO:0051236	GO:0050657	GO:0006839	GO:0051147	GO:0022618	GO:0048017	GO:0008203	GO:0050658	GO:0051262	GO:0017157	GO:0010906	GO:0007631	GO:0010212	GO:0070507	GO:0042089	GO:0046631	GO:0051250	GO:0048015	GO:0002429	GO:0070374
GO Term	cellular response to nutrient levels	cellular amine metabolic process	cytokine metabolic process	regulation of JAK-STAT cascade	erythrocyte differentiation	regulation of nucleotide biosynthetic process	camera-type eye morphogenesis	antigen processing and presentation	cytokinesis	response to UV	negative regulation of catabolic process	single-organism carbohydrate catabolic process	sensory perception of pain	negative regulation of epithelial cell proliferation	zymogen activation	neuropeptide signaling pathway	regulation of transmembrane transporter activity	regulation of cell shape	intrinsic apoptotic signaling pathway in response to DNA damage	regulation of DNA replication	myelination	regulation of purine nucleotide biosynthetic process	regulation of peptidyl-serine phosphorylation	acute inflammatory response	smoothened signaling pathway	digestive tract development	regulation of G-protein coupled receptor protein signaling pathway	sodium ion transmembrane transport	positive regulation of cysteine-type endopeptidase activity involved in apoptotic process	establishment of RNA localization	nucleic acid transport	mitochondrial transport	regulation of muscle cell differentiation	ribonucleoprotein complex assembly	inositol lipid-mediated signaling	cholesterol metabolic process	RNA transport	protein tetramerization	regulation of exocytosis	regulation of glucose metabolic process	feeding behavior	response to ionizing radiation	regulation of microtubule cytoskeleton organization	cytokine biosynthetic process	alpha-beta T cell activation	negative regulation of lymphocyte activation	phosphatidylinositol-mediated signaling	immune response-activating cell surface receptor signaling pathway	positive regulation of ERK1 and ERK2 cascade
GO Level	6	6	6	8	10	10	10	3	6	6	6	6	7	7	8	8	8	8	9	9	10	11	11	6	7	7	8	10	11	5	7	7	7	7	7	7	8	8	9	9	4	5	7	7	8	8	8	9	11
No. of annotated genes with data in Gemma	105	105	105	105	105	105	105	104	104	104	104	104	104	104	104	104	104	104	104	104	104	104	104	103	103	103	103	103	103	102	102	102	102	102	102	102	102	102	102	102	101	101	101	101	101	101	101	101	101
Symbol_1	Pcsk9	Amd2	Cd276	Arl2bp	Isg15	Adcy4	Tdrd7	Gm11127	Ccp110	Ddb2	1700021K19Rik	H6pd	Grm3	Eaf2	Tbc1d10a	Nps	Gm16509	Arhgef18	Topors	Pot1a	Fig4	Adcy4	Prkd2	Ano6	Tmem17	Pkdcc	Ric8	Slc6a8	Nod1	Nup107	Nup107	Ppif	Maml1	Gm3577	Plekha1	Ldlrap1	Nup107	Acacb	Spink13	Gck	Grm7	Bre	Kifc1	Cd276	Nckap1l	Tigit	Plekha1	Plekha1	Prkd2
Symbol_2	Fcor	Smpdl3b	Ticam1	Agt	Nckap1l	Adcy3	Phactr4	Nod1	Bbs4	Hyal3	Tbc1d14	Gck	Ace	Acvrl1	Nod1	Bai1	Ppif	Rhoq	Atm	Cdk9	Ypel1	Adcy3	Arrb1	Vimp	Boc	Ovol2	Snx25	Slc6a15	Arrb1	Xpo1	Xpo1	Aip	Prickle1	Eftud1	Inpp5f	Pcsk9	Xpo1	Acaca	Napa	Smek2	Npy	Xrcc4	Xpo1	Ticam1	Braf	Cd276	Inpp5f	Prkd2	Nod1
Symbol_3	Atg14	Agpat6	Nod1	Agtr1a	Exoc6	Npffr2	Rdh13	H2-Q6	Nusap1	Akt1	Mycbp2	Ppp1r3e	Chrna4	Ager	F11	Celsr3	Sri	Cdc42ep2	Bad	Ccdc88a	Adam22	Npffr2	Braf	Adam8	Ctnna1	Acvr2b	Arrdc3	Slc9a3	Alox12	Thoc5	Thoc5	Slc25a5	Foxp1	Psip1	Synj1	Apof	Thoc5	Cth	Braf	Ppp1r3e	Pmch	Nabp1	Tbcd	Nod1	Ada	Pawr	Synj1	Nckap1l	Camk2d
Symbol_4	Tbc1d14	Maob	Card11	Akr1b3	Jmjd6	Guca1b	Shroom2	H2-Q9	E2f8	Aqp1	Prkaa1	Prkaa1	Chrnb2	Apc	Apaf1	Npy	Ank2	Cdc42ep1	Bak1	Obfc1	Akt1	Guca1b	Raf1	Adcyap1	Runx2	Ada	Gpsm3	Scn2a1	Apaf1	Pom121	Pom121	Atf2	Fdps	Cnot6	Unc5b	Cyp27a1	Pom121	Shmt2	Rap1a	Prkaa1	Ace	Apobec1	Rcc2	Card11	Adora2a	Adora2a	Unc5b	Lpxn	Prkcdbp
Symbol_5	Rrp8	Ache	Adam33	Cav1	Hba-a2	Grm7	Foxe1	H2-M10.3	Pkn2	Bak1	Taf9	Ldhal6b	Adcyap1	Apoe	Apoh	Pmch	Actn2	Arap3	Bax	E2f8	Akt2	Grm7	Angpt1	Adora1	Cd3e	Alx4	Grm5	Scn4a	Rhoa	Tpr	Tpr	Atpif1	Adrb1	Snrpd2	Pi4kb	Prkaa1	Tpr	Acadl	Abr	Prkaa2	Chrnb2	Rhob	Tpr	Adam33	Ap3b1	Atm	Pi4kb	Pawr	Arrb1
Symbol_6	Gck	Chrnb2	Cebpe	Cdk5	Acvr1b	Abca1	Pde6c	Ap3b1	Vps4a	Bax	Egln1	Prkaa2	Adora1	Apoh	Bad	Gpr98	Adrb1	Baiap2	Bcl2	Ehmt2	Gjc3	Abca1	Akt1	Ahsg	Chrd	Nkx3-2	Arrb1	Slc8a2	Bad	Sec13	Sec13	Bad	Boc	Celf4	Ogt	Prkaa2	Sec13	Acadm	Bcr	Prkag2	Adora2a	Atm	Apc	Cebpe	Ap3d1	Bcl6	Ogt	Ada	Braf
Symbol_7	Prkaa1	Amd1	Pawr	Cdk5r1	Acvr2a	Acr	Vsx1	Ap3d1	Ank3	Bcat1	Adora1	Prkag2	Adra2c	Nr2f2	Bak1	Kiss1r	Ager	Palmd	Bcl2a1a	Atf1	Atrn	Acr	Akt2	Alox5	Fgf10	Bcl2	Adrbk1	Slc8a3	Bak1	Srsf1	Srsf1	Bak1	Zfhx3	Srsf1	Prr5	Pphc2	Srsf1	Acads	Adora2b	Ogt	Adrb3	Bak1	Capzb	Pawr	Atp7a	Prdm1	Prr5	Bax	Rap1a
Symbol_8	Prkaa2	Apc	Tirap	Socs1	Add1	Adcy6	Aldh1a1	Rab27a	Anxa11	Bcl2	Adra1b	Ogt	Adrb1	Ar	Bax	Pth2	Stim2	Aldoa	Bcl2a1b	Bmp4	Ctnnb1	Adcy6	Araf	Alox5ap	Fgf9	Klf5	Ada	Asic2	Bax	Ddx19a	Ddx19a	Bax	Bcl2	Bicd1	Adora3	Cyb5r3	Ddx19a	Ache	Adora3	Acadm	Agrp	Bax	Ctnnb1	Tirap	Bcl2	Bmp4	Adora3	Bcl10	Npnt
Symbol_9	Alb	Apoa1	Apoa2	Cntf	Alas2	Adcy7	Aqp1	Azgp1	Apc	Bcl3	Adra2a	Pygb	Adrb2	Atp5a1	Bcl10	Adcyap1	Slc25a4	Anxa7	Bcl2a1c	Bmp5	Cd9	Adcy7	Avp	Aoc3	Fgfr2	Ctnnb1	Adcyap1	Slc28a3	Bcl10	Igf2bp1	Igf2bp1	Bcl2	Bmp10	C1qbp	Angpt1	Fdps	Igf2bp1	Actn2	Rims1	Adipoq	Agt	Bcl2	Cav1	Apoa2	Bcl3	Btn1a1	Angpt1	Bcl2	Adcyap1
Symbol_10	Atg5	Apoa2	Bcl10	Crlf1	Ank1	Adcy9	Aqp5	B2m	Birc5	Brca2	Akt1	Pygl	Alox5	Atpif1	Bid	Agrp	Bcl2	Coro1a	Bcl2a1d	Brca2	Cdh2	Adcy9	Bak1	Bdkrb2	Fgfr3	Cckbr	Adm	Slc5a5	Bid	Igf2bp3	Igf2bp3	Bcl2l1	Bmp2	Ccrn4l	Agt	Hdlbp	Igf2bp3	Adsl	Rims2	Adra1b	Agtr1a	Bcl2l1	Cav3	Bcl10	Bcl6	Casp3	Agt	Bcl2a1d	Adra1a
Symbol_11	Bcl2	Apoa4	Bcl3	Csf1r	Atpif1	Adcyap1	Bak1	Calr	Rhoa	Cat	Apoa2	Pgd	Aqp1	Phb2	Bcl2l11	anx	Cacna1d	Coch	Bcl2l1	Cacybp	Cldn5	Adcyap1	Bax	Serping1	Fkbp8	Cdh1	Adrb2	Slc13a3	Bcl2l11	Srsf10	Srsf10	Bid	Bmp4	Cirbp	C1qbp	Abca1	Srsf10	Agrn	Rab27a	Akt1	Agtr1b	Blm	Ccnf	Bcl3	Blm	Ctla4	C1qbp	Blk	Angpt1
Symbol_12	Hrk	Apoc1	Cd1d1	Csf2	Bcl6	Adcyap1r1	Bax	Cd1d1	Rhob	Casp3	Apoc1	Adra1b	Bdkrb1	Bmp4	Casp8	Calca	Cacnb4	Csf1r	Bcl2l10	Calr	Cxcr4	Adcyap1r1	Bcl2	C1qbp	Gas1	Cfc1	Axin1	Atp1a1	Casp12	Fmr1	Fmr1	Bcl2l11	Smyd1	Clns1a	Car8	Abca2	Fmr1	Aldh1a1	Cacna1a	Akt2	Derl2	Brca1	Cdc42	Cd1d1	Cd1d1	Cd24a	Car8	C3ar1	Alox15
Symbol_13	Rb1cc1	Atp7a	Cd1d2	Dab1	Bmp4	Adm	Bmp4	Cd1d2	Rhoc	Casp7	Apoc3	Adrb1	Cacna1a	Gdf2	Casp9	Celsr1	Cacng2	Diap1	Bcl2l2	Cdk1	Dag1	Adm	Bdkrb2	C3	Gli1	Col3a1	Axin2	Atp1b1	Casp8	Htt	Htt	Bnip3	Btg1	Celf1	Cat	Abcg1	Htt	Aldoc	Cacna1g	Bad	Aoc3	Brca2	Cdk5r1	Cd1d2	Cd1d2	Cdkn2a	Cat	C5ar1	Tirap
Symbol_14	Cdkn2b	Bche	Cd28	Epo	Bpgm	Adnp	Bmp7	Ccr7	Bcl2l1	Casp9	Cidea	Aldoa	Cacna1b	Brca2	Cck	Cort	Casq2	Epb4.1l2	Bcl3	Cdc42	Egr2	Adnp	Bdnf	C6	Gli2	Ednrb	Bicd1	Atp1b2	Casp9	Hhex	Hhex	Bnip3l	Capn3	Ddx3x	Cbl	Acadl	Hhex	Mat1a	Cdk5	Entpd5	Aplp2	Cdkn1a	Cdkn1b	Cd28	Cd24a	Dlg1	Cbl	Cacnb3	Bmp2
Symbol_15	Cln3	Chkb	Cd3e	Erbb4	Casp3	Adora2a	Ctnnb1	Ctse	Cxcr5	Ccnd1	Cln3	Aldoc	Cacna1e	Cask	Cdkn1b	Crcp	Cav1	Epb4.1l3	Bcl2l11	Cdk2	Eif2ak3	Adora2a	Cav1	Casp6	Gli3	Egfr	C3	Atp1b3	Cck	Hnrnpa1	Hnrnpa1	Cnp	Cav3	Ddx6	Entpd5	Acadvl	Hnrnpa1	Anxa2	Cdk5r2	Clk2	App	Clk2	Chek1	Cd3e	Cd28	Erbb2	Entpd5	Cacnb4	Bmp4
Symbol_16	Comt	Chka	Cebpb	F2r	Cdk6	Adora2b	Vsx2	Fcer1g	Brca2	Cdc25a	Cnr1	Bad	Calca	Cav1	Cdkn2a	Crhr1	Cav3	Epb4.2	Brca1	Csf2	Eif2b4	Adora2b	Cd44	Cd59a	Gpc3	Ephb3	Calca	Fxyd2	Cdkn1b	Khsrp	Khsrp	Eya2	Cd53	Dync1h1	Cntf	Aplp2	Khsrp	Cat	Ccr2	Fbp1	Bdnf	Clock	Dst	Cebpb	Cd3e	Fas	Cntf	Ctla4	C3
Symbol_17	Ctsd	Cln3	Cebpg	Fgfr3	Cebpg	Adra2a	Cnga3	Fcgr1	Birc6	Cdkn1a	Cst3	Glb1	Cck	Cav2	Col4a3	Ecel1	Cnih2	Dmtn	Brca2	Smc3	Epb4.1l3	Adra2a	Cdc42	Cfh	Hes1	Stx2	Camk2b	Cav3	Cdkn2a	Rpsa	Rpsa	Gdap1	Col14a1	Eif3a	Csf1r	Apoa1	Rpsa	Cbr2	Crhr1	Gapdhs	Calca	Cryab	Mapre1	Cebpg	Cd80	Fcgr2b	Csf1r	Cd19	C5ar1
Symbol_18	Cyp27b1	Comt	Ccr2	Ghr	Dnase2a	Adrb1	Col8a1	Fcgr2b	Cdc25b	Cdkn2d	Dbi	Bpgm	Cckbr	Runx3	Cradd	Emr1	Crh	Eps8	Casp14	Cst3	Erbb2	Adrb1	Csf3	Cxcr2	Hes5	Fgf10	Cav2	Cpox	Col4a3	Nup155	Nup155	Gpd1	Ddit3	Celf2	Csf3	Apoa2	Nup155	Cnga2	Doc2a	Gcgr	Cck	Gadd45a	Ect2	Ccr2	Cd83	Flt3	Csf3	Cd28	Cd44
Symbol_19	Gas6	Pcyt1a	Ereg	Hcls1	Epas1	Adrb2	Cryaa	Fcgr3	Cdc42	Chek1	Dffa	Entpd5	Cdk5	Cdh1	Ctsh	Gal	Crhbp	Plxnb2	Casp2	Egfr	Ercc2	Adrb2	Dkk1	Ccr5	Foxf1	Fgf9	ckr	Slc6a3	Cradd	Magoh	Magoh	Htt	Dkk1	Srsf10	Edn1	Apoa4	Magoh	Cryz	Doc2b	Gpd1	Cckar	Ect2	Efna5	Ereg	Ccr2	Dtx1	Edn1	Cd38	Chil1
Symbol_20	Hspa5	Slc6a3	Fcer1a	Hes1	Epb4.2	Adrb3	Crygb	Fcgrt	Cfl1	Cirbp	Egfr	Eno2	Ccr2	Cdk6	Cycs	Galr1	Crhr1	F2	Casp9	Epo	Fgfr3	Adrb3	Dmd	Ccr7	Hhip	Fgfr2	Drd2	Dmd	Ctsh	Myo1c	Myo1c	Hsp90aa1	Dmpk	Grb7	Epha5	Apoc1	Myo1c	Pcbd1	F2rl1	Gfpt1	Cnr1	Egr1	Epha3	Fcer1a	Ccr7	Gal	Epha5	Cd3e	Ccr1
Symbol_21	Hdac6	Dbh	Fcgr3	Hes5	Dmtn	Aplp1	Dscam	H2-Aa	Cit	Crip1	Fbp1	Eno3	Cnr1	Cdkn1b	Klk1b22	Galr2	Dlg4	Ptk2	Cd44	Ereg	Fyn	Aplp1	Dmtn	Cnr1	Hipk1	Fgfr3	Drd3	Drd3	Cycs	Npm1	Npm1	Hspa4	Edn1	Eif6	Erbb2	Apoc3	Npm1	Evl	Fcer1a	Gnmt	Cntfr	Elk1	Fes	Fcgr3	Eomes	Gli3	Erbb2	Cd247	Ackr3
Symbol_22	Foxa2	Drd1a	Tlr3	Hgs	Epo	Apoe	elap	H2-Ab1	Daxx	Cryaa	Fhit	Fbp1	Cnr2	Cdkn1c	Egfbp2	Galr3	Dmd	Fes	Cdkn1a	Fgf10	Gnpat	Apoe	Gas6	Crp	Hipk2	Foxf2	Edn1	Drd4	Ddx3x	Nup62	Nup62	Ier3	Efnb2	Rpsa	Erbb3	Apoe	Nup62	Fbp1	Ms4a2	Gpld1	Cpt1a	Ercc1	Fgf13	Tlr3	Fut7	H2-Aa	Erbb3	Cd79a	Csf1r
Symbol_23	Foxa3	Drd4	Gata3	Hmga2	Ercc2	Avp	Epha2	H2-Bl	Drd2	Egfr	Fyn	G6pc	Crhr2	Cdkn2a	Klk1b9	Glp1r	Drd2	Fgd1	Cdkn2d	Gli1	Nkx6-2	Avp	Gcg	Cr1l	Foxa1	Foxl1	F2	Fgf12	Eif2ak3	Nup88	Nup88	Kif5b	Ehd1	Rps2	F2	App	Nup88	Gfpt1	Fcer1g	Grb10	Crh	Eya1	Fkbp4	Gata3	Gata3	H2-Ab1	F2	Ccr7	Dcc
Symbol_24	Jun	Fabp3	Foxj1	Hnf4a	Etv2	Calca	Ephb2	H2-D1	Drd3	Ercc1	Gata4	G6pdx	Ctss	Cdkn2b	Eif2ak3	Glra1	Drd3	Fgr	Ackr3	Gli2	Hes5	Calca	Hcls1	Cd55	Foxa2	Gata4	Gpr44	Slc34a3	F2r	Casc3	Casc3	Mfn2	Epc1	Rnr1	F2r	Cat	Casc3	Gls	Fes	Nr3c1	Crhr1	Eya3	Hdac6	Foxj1	Gli3	H2-M3	F2r	Cr2	Drd2
Symbol_25	Myod1	Fgf7	Hspb1	Hpx	Sfxn1	Calcr	Fgfr3	H2-Eb1	Ect2	Ercc2	Bscl2	Gaa	Edn1	Cxcr3	F2r	Glrb	Drd4	Fn1	Crip1	Hcrt	Hexa	Calcr	Ifna1	Ednrb	Ndst1	Gata5	Grk4	Slc6a13	F3	Qk	Qk	Slc8b1	Ereg	Rnr2	F2rl1	Cebpa	Qk	Gnmt	Fgr	Hif1a	Crhr2	Xrcc6	Hsph1	Hspb1	H2-Ab1	Ptpn6	F2rl1	Bcar1	Ednra
Symbol_26	Nbr1	Fshr	Ifnar1	Prmt2	Fech	Crh	Fjx1	H2-K1	Opn1mw	Ercc3	Gpld1	Gapdhs	Ednra	Ctsl	F3	Gpr56	Epo	Fyn	E2f1	Hras1	Hexb	Crh	Ifna11	F2	Ihh	Gata6	Grk5	Hcn1	Fasl	Ranbp2	Ranbp2	Bbc3	Ezh2	Cnot7	Ptk2	Cel	Ranbp2	Gpx3	Ncs1	Hmgb1	Cyp11b2	Gata3	Htr1a	Ifnar1	H2-M3	Foxj1	Ptk2	Csk	Egfr
Symbol_27	Ncoa1	Gata3	Ifng	Ifna1	G6pdx	Crhr1	Foxf2	H2-L	Igf1r	Fech	Grin2a	Gpd1	Ednrb	Dab2	Fadd	Nmur1	Cacng5	Gas2	Ei24	Hus1	Id4	Crhr1	Ifna2	F3	Kif3a	Gli2	Htr1b	Hcn2	Ctgf	Khdrbs1	Khdrbs1	Bhlha15	Fgfr2	Dicer1	Fgr	Cftr	Khdrbs1	Gria2	Gab2	Foxa2	Dach1	Lrp2	Cep250	Ifng	Hlx	Hlx	Fgr	Elf1	Erbb4
Symbol_28	Npc1	Gpr37	Igh-7	Ifna11	Gata1	Crhr2	Gdf11	H2-M10.1	Incenp	Gpx1	Grin2c	Gm2a	Ephx2	Dlg1	Fasl	Grpr	Fgf12	Gas7	Epha2	Id3	Ifng	Crhr2	Ifna4	F8	Kif7	Gli3	Htr2b	Hcn3	Gnb2l1	Srsf3	Srsf3	Mtx1	Nr3c1	Luc7l2	Flt1	Ch25h	Srsf3	Grin1	B4galt1	Hnf4a	Drd1a	Gpx1	Stmn1	Igh-7	Hsph1	Hmgb3	Flt1	Fcer1g	Esr1
Symbol_29	Mybbp1a	Hdc	Il10	Ifna2	Gata2	Drd1a	Gli3	H2-M2	Kif13a	Hmgn1	Hp	Gpi1	Nr2f6	Efnb2	Ggt1	Hcrt	Fhl1	Gna12	Hic1	Igf1	Ilk	Drd1a	Ifna5	Fcer1a	Gpr37l1	Hes1	Itgb1	Slc6a4	Hmgb1	Slbp	Slbp	Nptx1	Hdac2	Slu7	Ncs1	Cyp11a1	Slbp	Grin2a	Glra1	Hsd11b1	Drd2	Grb2	Arhgef2	Il10	Ifng	Id2	Ncs1	Fyn	Esr2
Symbol_30	Pafah1b2	Lipc	Il18	Ifna4	Gata3	Drd2	Gnat2	H2-M3	Kif3b	Hus1	Htr2b	Hexb	F2r	Aimp1	Gnb2l1	Eltd1	Fkbp1a	Gna13	Hipk1	Igf1r	Kcnj10	Drd2	Ifna6	Fcer1g	Nme7	Foxf1	Arhgef1	Slc8b1	Hspd1	Eif5a2	Eif5a2	Psen1	Hdac5	Rbmx	Fyn	Cyp46a1	Eif5a2	H2-T18	Grik5	Htr2a	Dmbx1	Hmga2	Inpp5j	Il18	Ihh	Ido1	Fyn	Gata3	F2r
Symbol_31	Pdk2	Hpn	Il1a	Ifna5	Gfi1b	Drd3	Hcn1	H2-M9	Snx18	Hyal1	Ier3	Hif1a	Fgfr1	Eng	Hpn	Pnoc	Fkbp1b	Pdpn	Hipk2	Il6	Mal	Drd3	Ifna7	Fcgr1	Sept2	Hif1a	Usp33	Asic3	Ifnb1	Supt6	Supt6	Slc1a3	Foxf1	Rbmxl1	Gab2	Cyp51	Supt6	Hsd17b10	Foxf1	Ier3	Gal	Hus1	Mid1	Il1a	Il12a	Ifnb1	Gab2	Gcsam	F2rl1
Symbol_32	Pick1	Hprt	Il1b	Ifna6	Hba-a1	Drd4	Hipk1	H2-DMa	Myh9	Hyal2	Il10	Hk1	Fyn	Esr2	Hspd1	Npy1r	Gnb5	Hck	Hmox1	Inppl1	Mbp	Drd4	Ifna9	Fcgr2b	Nkx2-2	Hlx	Mgrn1	Nos1	Cyr61	Sidt2	Sidt2	Slc25a14	Id3	Rps14	Gata3	Cyp7a1	Sidt2	Hmgcl	Hmox1	Igf1	Glp1r	Bbc3	Map1a	Il1b	Il12b	Ihh	Gata3	Gpld1	Fgf10
Symbol_33	Med1	Htr1a	Il1rap	Ifna7	Hba-x	Drd5	Hipk2	H2-DMb1	Sept2	Il12a	Il1b	Hk2	Gip	Fgfr2	Ifnb1	Npy2r	Gsto1	Hexb	Hnrnpk	Ins2	Mpdz	Drd5	Ifnab	Fcgr3	Nkx6-1	Hoxa13	Palm	Pkd2	Jak2	Alyref	Alyref	Slc9a1	Igfbp3	Rps15	Hcls1	Cyp7b1	Alyref	Hmgcr	Igh-7	Igf2	Gls	Men1	Map1b	Il1rap	Il15	Cd74	Hcls1	Ptpn6	Fgf15
Symbol_34	Psen1	Htr2c	Il4	Ifna9	Hbb-b1	Edn1	Hmgn1	H2-DMb2	Prkce	Il12b	Il3	Hmgb1	Grin1	Fgfr3	Cuzd1	Npy5r	Ikbkb	Hpn	Ier3	Insr	Myo5a	Edn1	Ifnb1	Fn1	Nsdhl	Hoxa5	Pde6g	Plcb1	Lck	Nup153	Nup153	Pde2a	Ilk	Rps17	Ptpn6	Dhcr7	Nup153	Hprt	Lyn	Igfbp3	Grin1	Msh2	Mapt	Il4	Il18	Il10	Ptpn6	Cd79b	Fgf18
Symbol_35	Rab1	Ido1	Il6	Ifnab	Hbb-b2	Ednra	Ihh	H2-Oa	Plk1	Ivl	Ins2	Hsd11b1	Grin2a	Gas1	Jak2	Npy6r	Ins2	Icam1	Ifi204	Jun	Nab1	Ednra	Ifng	B4galt1	Pax6	Hoxd13	Plcb1	Bpifa1	Bbc3	Tnks	Tnks	Rhot2	Mbnl3	Rps19	Hgf	Ebp	Tnks	Ide	Myo5a	Igfbp4	Grin2b	Myc	Nek2	Il6	Il18r1	Il2	Hgf	Ighm	Fgf2
Symbol_36	Rab23	Ins2	Il9	Ifnb1	Hcls1	Rxfp2	Jag1	H2-Ob	Pstpip1	Men1	Smad3	Htr2a	Grin2b	Gata3	Klk1b26	Ntsr1	Kcnab1	Il6	Cd74	Mas1	Nab2	Rxfp2	Il11	Cxcl1	Prrx1	Hrh2	Pld2	Scn10a	Smad3	Tst	Tst	Mcu	Mef2c	Atxn2	Htr2a	Ephx2	Tst	Igf1r	Napb	Igfbp5	Hand2	Nek1	Npm1	Il9	Il2rg	Il2ra	Htr2a	Itk	Fgf4
Symbol_37	Rab33b	Atcay	Inhbb	Ifng	Heph	Galr1	Lhx1	H2-Q1	Kif20a	Mme	Smad4	Ier3	Grin2d	Gdf5	Klkb1	Ntsr2	Kcne1	Itga7	Bbc3	Men1	Ndrg1	Galr1	Il6	Gstp1	Por	Id2	Klk6	Scn1a	Men1	Eny2	Eny2	Micu1	Mesp1	Snrpc	Htr2b	Fdft1	Eny2	Insr	Ncam1	Il3	Hcrt	Pml	Pkd1	Inhbb	Il4	Il4	Htr2b	Kcnn4	Fgfr2
Symbol_38	Nr1h4	Fabp5	Inpp5d	Igf1	Hif1a	Galr2	Lrp5	H2-Q10	Sstr5	Msh2	Mdm4	Igf1	Grm1	Gpc3	Lck	Gpr143	Kcnj11	Kdr	Mbd4	Met	Nf1	Galr2	Lats1	Hp	Ptch1	Ihh	Rgs16	Scn1b	Myc	Zc3h3	Zc3h3	Trp53	Sik1	Snrpb	Igf1	Fdx1	Zc3h3	Kcnj10	Notch1	Il6	Htr1a	Pnp	Ranbp1	Inpp5d	Il4ra	Il4ra	Igf1	Lck	Fgfr3
Symbol_39	Slc2a1	Lcat	Irf1	Ikbkb	Hoxa5	Galr3	Lrp6	H2-Q2	Son	Msh6	Mt3	Il3	Grm8	Hpn	Bbc3	Oprd1	Myo5a	Kit	Mcl1	Kitl	Ngfr	Galr3	Lif	Icam1	Rab23	Kit	Rgs2	Scn5a	Nkx3-1	Srsf7	Srsf7	Tst	Msx1	Snrpd1	Igf1r	Fdxr	Srsf7	Kcnj12	Nsf	Ins2	Htr1b	Prkdc	Rgs2	Irf1	Il6	Inpp5d	Igf1r	Lyn	Fgfr4
Symbol_40	Snai2	Ldlr	Irf4	Il12a	Id2	Gcg	Mfn2	H2-Q4	Sptbn1	Nedd4	Nos2	Ins2	Hoxb8	Krt4	Smad3	Oprm1	Nedd4	Lst1	Mif	Mre11a	Ntf3	Gcg	Inpp5j	Ighg2b	Rb1	Smad2	Rgs4	Scn7a	Nodal	Thoc1	Thoc1	Ucp1	Myod1	Snrpe	Ins2	Fech	Thoc1	Kcnj2	Pdpk1	Insr	Htr2c	Ptprc	Rnf4	Irf4	Ins2	Irf1	Ins2	Mef2c	Ctgf
Symbol_41	Srebf1	Maoa	Irf9	Il12b	Inhba	Ghrh	Man2a1	H2-Q7	Aurkb	Pik3r1	Npc1	Insr	Hoxd1	Lect1	Mmp14	Pdyn	Nkx2-5	Parvb	Mlh1	Nf2	Omg	Ghrh	Smad7	Ighg1	Prrx2	Smad3	Rgs5	Scn8a	Slc11a2	Ahctf1	Ahctf1	Ucp2	Myog	Srpk2	Irs1	Fgf1	Ahctf1	Kcnma1	Pfn2	Irs1	Iapp	Rad1	Rock2	Irf9	Irf1	Itch	Irs1	Nfatc2	Flt4
Symbol_42	Srf	Mecp2	Klf4	Il13	Inpp5d	Ghrhr	Meis1	H2-T10	Cspp1	Pml	Pabpc1	Ldha	Htr2a	Lrp6	Myc	Penk	Nrxn1	Myh9	Msh2	Npm1	Pikfyve	Ghrhr	Met	Igh-7	Sfrp1	Ascl1	Rgs9	Scn9a	P2rx1	Nup188	Nup188	Ucp3	Naca	Strap	Jak2	G6pdx	Nup188	Trpm8	Prkca	Khk	Ins2	Rad51	Rp1	Klf4	Irf4	Jak3	Jak2	Pde4b	Gas6
Symbol_43	Supt5	Nr4a2	Lag3	Il15	Jak2	Gnal	Cited2	H2-T22	Zfyve26	Ptprk	Furin	Ldhb	Htr2c	Mef2c	Nkx3-1	Pkd1	Pde4b	Myo10	Msh6	Pcna	Plp1	Gnal	Mif	Igh-8	Shh	Myb	Ccl5	Scnn1a	Pdcd6	Nup214	Nup214	Vdac1	Nkx2-5	Surf6	Kdr	Hmgcr	Nup214	Mbl1	Pkdrej	Lep	Lep	Rad51ap1	Stmn2	Lag3	Itch	Lag3	Kdr	Prkcb	Gcg
Symbol_44	Lzts1	Oaz1	Lbp	Il2	Kit	Gng7	Nf1	H2-T23	Map9	Rela	Pde3b	Ldhc	Htr7	Nf1	Slc11a2	Pomc	Pkd2	Palm	Muc1	Pdgfa	Pmp22	Gng7	Ntf3	Il1a	Shox2	Nkx2-2	Snca	Scnn1b	Pml	Hnrnpa3	Hnrnpa3	Tomm22	Notch1	Tarbp2	Klf4	Hmgcs2	Hnrnpa3	Me1	Plcb1	Mif	Lepr	Rad54l	Stmn3	Lbp	Itk	Xcl1	Klf4	Prkch	Gcnt2
Symbol_45	Atg9b	Oaz2	Ltb	Il4	Klf1	Gpr65	Notch2	H2-T24	Rab11fip3	Ruvbl2	Prkcg	Lrp5	Iapp	Nfib	P2rx1	Npy4r	Plcb1	Ptk2b	Myc	Pdgfb	Pou3f1	Gpr65	Ntrk3	Il1b	Stil	Nkx2-3	Kctd12b	Scnn1g	Pparg	Nupl2	Nupl2	Ywhaz	Pik3r1	Prmt7	Ltk	Lipc	Nupl2	Nrxn1	Pld2	Sik1	Mc4r	Rad9a	Sgk1	Ltb	Jak3	Glmn	Ltk	Plcg1	Hmgcr
Symbol_46	Fnip1	Odc1	Zfp287	Il5	Klf2	Grm8	Pax2	H2-T3	Flcn	Sdf4	Ppargc1a	Mif	Il10	Nkx2-9	Pdcd6	Scg5	Plcg1	Pxn	Pik3r1	Pdgfra	Pou3f2	Grm8	Osm	Il1rn	Sall3	Nodal	Syp	Slc10a1	Rest	Nup133	Nup133	Zfp13	Plcb1	Gemin5	Nedd4	Hsd17b7	Nup133	Pfkl	Sept5	Myc	Mif	Uimc1	Snca	Zfp287	Lef1	Lyn	Nedd4	Prnp	Hras1
Symbol_47	Ift88	Pax8	Tlr7	Il6	Mafb	Guca1a	Pax6	H2-T9	Cntrob	Trove2	Flna	Myc	Il12b	Nkx3-1	Serpine1	Sstr1	Pln	S100a13	Pml	Pla2g1b	Pten	Guca1a	Pak1	Il4	Serpine2	Notch1	Cntn2	Slc10a2	Ret	Setd2	Setd2	Mfsd7b	Prl2c2	Rpl13a	Nf1	Il4	Setd2	Pfkm	Pou5f1	Pdk2	Npy1r	Sfrp2	Plk2	Tlr7	Anxa1	Mertk	Nf1	Psen1	Htr2a
Symbol_48	Trim24	Pde1b	Tlr8	Il6ra	Ldb1	Guca2a	Pitx2	Mr1	Pik3c3	Aurkb	Trim40	Neu1	Il18	Pax6	Plat	Sstr2	Ppargc1a	S100b	Pnp	Pml	Dicer1	Guca2a	Pfn2	Il6	Trove2	Pcsk5	Arrb2	Slc12a3	Rnf7	Nxt2	Nxt2	Slc25a24	Prox1	Zrsr2	Nkx3-1	Lcat	Nxt2	Nlgn1	Nlgn1	Enpp1	Npy5r	Sfrp1	Map6d1	Tlr8	Xcl1	Prnp	Nkx3-1	Psen2	Htr2b
Symbol_49	Trp53	Enpp2	Glmn	Il6st	Lmo2	Guca2b	Pitx3	Hfe	Ahctf1	Agap3	Rela	Ogdh	Il1a	Etv4	Serpinf2	Sstr4	Nlgn1	Ccl11	Polb	Pparg	Qk	Htr1b	Pik3ca	Ins2	Ptchd1	Pdgfa	Git1	Slc1a1	Robo1	G3bp2	G3bp2	Slc25a10	Ptbp1	Patl1	Npr3	Ldlr	G3bp2	Pex5	Rab3a	Pfkfb1	Ntrk2	Snai2	Plk4	Glmn	Myb	Ptpn22	Npr3	Ptpn2	Htr2c
Symbol_50	Ulk1	Pemt	Cma1	Irf1	Ahsp	Htr1b	Pou2f1	Icam1	Pkp4	Ccar2	Shh	Pdha1	Itga2	Pla2g2a	Pml	Sstr5	Reln	Ccl12	Prkdc	Rac1	Rara	Insl3	Prkd1	Itih4	Wdr19	Pdgfra	Ppp1r9b	Slc1a2	S100a8	Nxf3	Nxf3	Atp5o	Tmsb4x	Eif2a	Ntrk2	Lep	Nxf3	Trpv5	Rab3d	Pfkfb2	Oxt	Sod2	Aurkb	Cma1	Nkx2-3	Foxp3	Ntrk2	Ptpn22	Cd74
Symbol_51	Usf1	Prkcd	Mast2	Isl1	Lyn	Insl3	Prom1	Ifng	Spg20	Trp53	Serpine2	Pdha2	Kcnj10	Med1	Pparg	Sort1	Ripk1	Ccl2	Rad9a	Rad17	Rarg	Lhcgr	Inpp5k	Kl	Iqub	Pdx1	Snx13	Slc1a3	S100a9	Alkbh5	Alkbh5	Timm9	Rbm4	Znhit6	Gpr143	Lepr	Alkbh5	Rps19	Rest	Pgam1	Oxtr	Stk11	Aurka	Mast2	Pax1	Sfrp1	Gpr143	Ptprc	Il1a
Symbol_52	Usf2	Pla2g1b	Myd88	Jak2	Smad5	Lhcgr	Prox1	Ighm	Prc1	Trp63	Stat3	Pfkfb2	Lxn	Ppard	Prss12	Mchr1	Ryr2	Ccl3	Skil	Shc1	Rxra	Pdzd3	Ripk2	Klk1b1	Wnt9a	Pitx2	Tulp3	Slc20a1	Snca	Nup54	Nup54	Timm8a1	Rbpj	Ythdc1	Pdgfa	Lipe	Nup54	Rrm1	Snca	Pomc	P2ry1	Trp53bp2	Spice1	Myd88	Prkcq	Sftpd	Pdgfa	Ripk2	Il1b
Symbol_53	Vamp8	Pla2g5	Nfkb1	Kit	Mb	Pdzd3	Ptf1a	Cd74	Chmp1a	Trp73	Hdac4	Pfkl	Asic3	Ptch1	Ret	Npb	S100a1	Ccl7	Snai2	Pif1	Rxrb	Mc1r	Sfrp2	Lbp	Kctd11	Dicer1	Ece1	Slc23a1	Sox7	Nup98	Nup98	Timm10	Shh	Cnot6l	Pdgfb	Lrp1	Nup98	Rrm2	Snap23	Ppara	Pou4f1	Brcc3	Cdk5rap2	Nfkb1	Prkcz	Shh	Pdgfb	Ptprj	Il6
Symbol_54	Vdr	Pon1	Pcsk5	Lck	Cited2	Mc1r	Ptprm	Psmb9	Spire2	Ube2a	Lzts1	Pfkm	Mc1r	Pten	Rnf7	Gpr139	Scn1b	Sema3e	Snai1	Stag2	Rxrg	Mc2r	Snca	Mbl2	Tgfbr2	Aldh1a2	Pde4d	Slc34a2	Stat1	Eif5a	Eif5a	Siva1	Shox2	Atxn2l	Pdgfra	Lrp5	Eif5a	S100a10	Stxbp5l	Ppargc1a	Phf21a	Fancd2	Senp6	Pcsk5	Pnp	Slfn1	Pdgfra	Foxp3	Kdr
Symbol_55	Dap	Pla2g15	Prkcq	Lep	Nfe2l1	Mc2r	Rbp4	Psmb8	Snx33	Ube2b	Nrg1	Pgam1	Mecp2	Ptprk	Robo1	Bai3	Stim1	Sema4a	Sod2	Wrap53	Ski	Mc3r	Cnksr3	Cd46	Ift88	Rb1	Gtf2h2	Slc5a1	Hip1	Ddx25	Ddx25	Gimap5	Sox8	Cnot1	Pdgfrb	Lss	Ddx25	Ccl5	Spink3	Ppp1ca	Ren1	Trp53	Terf1	Prkcq	Ptger4	Sox11	Pdgfrb	Cblb	Mif
Symbol_56	Wrn	Nr1h4	Rel	Lif	Slc11a2	Mc3r	Ring1	Slc11a1	Cdc6	Usf1	Agap2	Pgk1	Mme	Ptprm	S100a8	Tac1	Cnksr3	Sema4d	Ccar2	Terc	Sod1	Mc4r	Fnip1	Mif	Ptpdc1	Sfrp2	Kctd12	Slc8a1	Nlrp3	Igf2bp2	Igf2bp2	Tmem102	Sox9	Gemin8	Pik3c2a	Apobr	Igf2bp2	Shmt1	Stx1a	Ppp1cb	Mchr1	Trp63	Cenpj	Rel	Ptprc	Spn	Pik3c2a	Stk11	Mt3
Symbol_57	Wac	Sat1	Rela	Lyn	Pknox1	Mc4r	Rom1	Procr	Jtb	Wrn	Timp1	Pgk2	Ncam1	Pex2	S100a9	Tac2	Nlgn2	Cyfip1	Tnf	Terf1	Cntn2	Mc5r	Arrb2	Npy5r	Tulp3	Sfrp1	Mgll	Slc9a1	Terf1	Sidt1	Sidt1	Slc25a13	Hdac4	Nufip1	Pik3c2g	Mt3	Sidt1	Sod2	Stxbp1	Inpp5k	Ghsr	Trp73	Ska3	Rela	Ripk2	Btla	Pik3c2g	Syk	Nodal
Symbol_58	Pik3c3	Smpd1	S100b	Neurod1	Plcb1	Mc5r	Rp1	Psme1	Rxfp3	Map4k3	Timp3	Pkm	Ndn	Rb1	Snca	Tacr1	Trpc6	Spta1	Tnfrsf1a	Tgfb1	Tcf7l2	Mtnr1a	Tek	Orm1	Wnt10b	Shh	Rgs7	Snta1	Tnf	Thoc2	Thoc2	Acaa2	Supt6	Prmt5	Pik3ca	Mttp	Thoc2	Aldh5a1	Stxbp2	Pth	Stat3	Spidr	Wnt3a	S100b	Rara	Cblb	Pik3ca	Themis	P2ry1
Symbol_59	5330417C22Rik	Sms	Ccl20	Nf2	Med1	Mtnr1a	Rpe65	Psme2	Pin1	Xpa	Tnf	Pklr	Ngf	Robo1	Serpine2	Tacr3	Twist1	Sprr1b	Tnfrsf1b	Tgfb3	Eif2b2	Myc	Tgfb1	Orm2	Wnt7b	Shox2	Grk1	Slc6a6	Tnfrsf10b	Thoc6	Thoc6	Tomm40	Mkx	Gemin4	Pik3cd	Mvk	Thoc6	Tgm3	Stxbp3a	Ptpn2	Stra6	Wrn	Cep76	Ccl20	Relb	Il20rb	Pik3cd	Tec	Pdgfa
Symbol_60	Tnrc6a	Snca	Foxp3	Nlk	Ptpn2	Myc	Rs1	Rab10	Klhl9	Xpc	Tnfaip3	Ppara	Ngfr	Serpinf1	Stat1	Gpr126	Ywhae	Sprr2a1	Plscr1	Wapal	Tgfb1	Nf1	Tnf	Reg3b	Hhat	Ptk6	Gpr158	Slc24a1	Tnfsf10	Ncbp1	Ncbp1	Mtx2	Mylk3	Lsm2	Pik3r1	Npc1	Ncbp1	Tk1	Syk	Ranbp2	Tacr1	Xrcc5	Cenpe	Foxp3	Rora	Prdx2	Pik3r1	Cd300a	Pdgfb
Symbol_61	Chmp1a	Sptlc2	Spn	Notch1	Rb1	Nf1	Six3	Rab33a	Klhl21	Ercc5	Dedd	Ppargc1a	Nipsnap1	Sfrp2	Hip1	Nmur2	Ywhah	Syne3	Trp53	Tnfaip1	Tg	Nme2	Ucn	Serpinf2	Zic1	Sox10	Pde5a	Cnksr3	Dap	Nup85	Nup85	Sh3glb1	Tbx1	Prpf19	Pld2	Nsdhl	Nup85	Trp53	Syt1	Rora	Tacr3	Yap1	Parp3	Spn	Rorc	Cd300a	Pld2	Thy1	Pdgfra
Symbol_62	Atg4c	Scarb1	Ghsr	Pecam1	Rhag	Nme2	Ski	Rab4a	Cetn2	Yy1	Tob1	Ppp1ca	Nos1	Sfrp1	Nlrp3	Ucn	Ahcyl1	Fermt2	Trp63	Tnks	Serinc5	Nos1	Vegfa	Pparg	Cc2d2a	Sox11	Kctd8	Slc32a1	Wnt3a	Nxf1	Nxf1	Mpc1	Tbx3	Limd1	Ppard	Pctp	Nxf1	Trp63	Syt4	Rorc	Tcf15	Dclre1c	Dync1li1	Ghsr	Rpl22	Tgfb1	Ppard	Traf6	Pdgfrb
Symbol_63	Atg9a	Srm	Stat5a	Prl	Rhd	Nos1	Sox1	Rab5b	Cul3	Zranb3	Trp53	Ppp1cb	Npy1r	Snai2	Terf1	Grp	Plcg2	Vegfa	Trp73	Trp53	Trf	Nos2	Wnt3a	Ptger3	Tmem231	Sox17	Rpgrip1l	Ywhah	Xdh	Hnrnpa2b1	Hnrnpa2b1	Gsk3b	Zeb1	Gcfc2	Ptafr	Pon1	Hnrnpa2b1	Trp73	Lgi3	Ncor1	Nmur2	Ints3	Gas2l2	Stat5a	Ncor1	Tnfaip3	Ptafr	Plscr1	Prkca
Symbol_64	Asns	Sgms1	Stat5b	Ptk2b	Trim10	Nos2	Sox11	Rab6a	Rab11fip4	Usp1	Dap	Pygm	Ntrk1	Sox2	Thbs1	Qrfp	Scn3b	Vil1	Tpt1	Ttf1	Ugt8a	Nos3	Wnt5a	Ptgs2	Sufu	Ccdc40	Snx14	Slc9a2	Acer2	Ddx39b	Ddx39b	Slc37a2	Myocd	Rc3h1	Rara	Por	Ddx39b	Vasp	Rap1b	Sorbs1	Pyy	Brat1	Cib1	Stat5b	Satb1	Pglyrp1	Rara	Txk	Prkcz
Symbol_65	Eif2ak4	Ido2	Syk	Ptpn2	Rps14	Nos3	Sox2	Raet1a	Racgap1	Dcun1d3	Senp1	Rpia	Oprd1	Sox9	Clec3b	Bai2	Akap6	Ezr	Bag6	Ucn	Eif2b5	Nppc	Plcl2	Trpv1	Gpr161	Stra6	Rgs13	Slc6a1	Nlrp2	Rps28	Rps28	Pmaip1	Tgfb1	Ddx39b	Rasgrp1	Mvd	Rps28	Lrp4	Cd300a	Src	Th	Dcun1d3	Pkhd1	Syk	Sema4a	Tnfsf4	Rasgrp1	Plcl2	Serpinf2
Symbol_66	Cartpt	Lpcat1	Trib2	Ccl5	Rps19	Nppc	Sox8	Raet1b	Tas2r121	Tmem161a	Bag6	Ncor1	Oprk1	Stat1	Tnf	Hcrtr1	Pde4d	Fmnl3	Xpa	Zranb3	Sh3tc2	Npr1	Plcl1	Reg3a	Rpgrip1l	Tbx2	Grk6	Atp1a3	Map3k5	Pabpn1	Pabpn1	Rhot1	Thra	Ddx20	Reln	Pex2	Pabpn1	Ppat	Vamp1	Stat3	Nkx2-1	Rfwd3	Mcph1	Trib2	Foxp3	Tyro3	Reln	Cd226	Ptk2b
Symbol_67	Pdk4	Paox	Thbs1	Cxcl5	Rps6	Npr1	Sox9	Rab34	Ccdc87	Usp28	Wac	Sord	Oprl1	Stk11	Tnfrsf10b	Galp	Shank1	Fgd4	Pgap2	Parm1	Myrf	Npr3	Ifna13	Reg3g	Ift52	Hnf1b	Homer2	Scn3b	Mapk9	Mcm3ap	Mcm3ap	Gsk3a	Wnt3a	Pqbp1	Ncor1	Saa1	Mcm3ap	Cnga4	Vamp2	Stk11	Trh	Usp28	Mapk8	Thbs1	Shh	Scgb1a1	Ncor1	Zap70	Ripk2
Symbol_68	9630033F20Rik	Chpt1	Tia1	Dot1l	Ncor1	Npr3	Sp1	Relb	Spast	Sprtn	Ubxn1	Stat3	Oprm1	Strap	Dap	Mrgpra1	Nlgn3	Grlf1	Tmem161a	Kctd13	Amigo1	Palm	Gm13280	Saa1	Stk36	Tcf21	Klk14	Slc9a7	Casp8ap2	Nup210	Nup210	Tomm7	Prdm6	Eif3d	Ccl5	Soat1	Nup210	Cbr4	Zp3	Hdac4	Uchl1	Topbp1	Nubp1	Tia1	Btla	Thoc1	Ccl5	Themis2	Rara
Symbol_69	Atg13	Tacr3	Tlr1	Socs2	Spi1	Palm	Sp3	Tap1	E2f7	Atr	Psmf1	Hdac4	Oxt	Mtss1	Xdh	Mrgpra4	Kcne2	Plxnb1	Usp28	Enpp7	Ncmap	Ppargc1a	Ifne	Saa2	Map3k10	Tcf7	Adrbk2	Slc13a5	Nlrc4	Alyref2	Alyref2	Alkbh7	Ybx1	Ptbp2	Selp	Sod1	Alyref2	Impdh2	Rims4	Nr1d1	Ucn	Tspyl5	Racgap1	Tlr1	Stat6	Zfp35	Selp	Rltpr	Sema7a
Symbol_70	Wipi1	Tph2	Tlr4	Agap2	Smarca4	Ppargc1a	Stra6	Tap2	Dctn3	Map3k4	Cpeb2	Dhtkd1	P2rx4	Cdc73	Acer2	Gpr112	Grk6	Bves	Ell3	Grem1	Arhgef10	Ptgir	Paqr3	Saa3	B9d1	Tcf7l2	Rph3al	Slc24a4	Aifm1	Nxt1	Nxt1	Fis1	Ppapdc3	Mbnl1	Sema4d	Sorl1	Nxt1	Apoa1bp	Rims3	Phlda2	Adm2	Tlk2	Slc39a12	Tlr4	Cblb	Tnfrsf14	Sema4d	Plcg2	Src
Symbol_71	Rnf5	Chdh	Tlr6	Cd300a	Sox6	Ptgir	Tbx2	Tapbp	Rab11a	Mapk8	Herc1	Hk3	P2rx7	Tgfb1	Map3k5	Gpr64	Homer1	Cfdp1	Phlda3	Smc1a	Tenm4	Pth	Crebl2	Saa4	C2cd3	Myocd	Gipr	Scn11a	Foxl2	Phax	Phax	Immp1l	Klhl41	Eral1	Sox9	Sqle	Phax	Aldh1a7	Pclo	Pdk1	Prlhr	Atr	Tmem67	Tlr6	Syk	Btn2a2	Sox9	Pde4d	Rap1b
Symbol_72	Myh13	Trh	Tnf	Cenpj	Sp1	Pth	Megf11	9230019H11Rik	Fmn2	Mapk9	Tlk2	Abhd10	P2ry1	Tgfb2	Mapk9	Glra2	Slc9a3r1	Wasf3	Zfp385a	Atr	Tlr2	Pthlh	Caprin2	Ccl5	Smo	Rarb	Kctd16	Slc6a11	Acvr1c	Nup160	Nup160	Stoml2	Cyp26b1	Nip7	Serpine2	Scarb1	Nup160	Cpsf7	Cadps	Ppp1r3d	Gigyf2	Mapk14	Dixdc1	Tnf	Tcf7	Lax1	Serpine2	Sh2b2	Arrb2
Symbol_73	Wdr45	Vhl	Cd27	Tnfrsf1a	Sp3	Pthlh	Zeb1	Thbs1	Rala	Ercc6	Pik3cg	Taldo1	P2ry2	Tgfbr1	Casp8ap2	Npffr1	Gsg1l	Cdc42ep3	Ercc6	Map2k4	Lgi4	Ptk2b	Pde4d	Serpina1b	Intu	Trp63	Rgs1	Slc5a2	Vcp	Tsc1	Tsc1	Ccdc109b	Akap6	Gemin2	Agap2	Srebf1	Tsc1	Srr	Rab5a	Sesn2	Qrfp	Lig4	Stmnd1	Cd27	Cd300a	Pglyrp3	Agap2	Klhl6	Tek
Symbol_74	Ift20	Smox	Tnfrsf8	Cd40	Srf	Ptk2b	Tfap2a	Traf6	Prpf40a	Brsk1	Gimap5	Hkdc1	Penk	Tgfbr3	Nlrc4	Tenm1	Gpd1l	Epb4.1	Ep300	Mapk8	Wasf3	Pde2a	Hax1	Serpina3n	Tbc1d32	Trp73	Rgs6	Slc28a2	Rps3	Xpo7	Xpo7	Timm21	Grem1	Sbds	Pik3ip1	Srebf2	Xpo7	Dhrs4	Sytl4	Gckr	Hcrtr1	Ercc6	Knstrn	Tnfrsf8	Tgfbr2	Vtcn1	Pik3ip1	Malt1	Tff2
Symbol_75	Becn1	Pla2g3	Traf6	Pigu	Stat5a	Pde2a	Th	Bag6	Becn1	Primpol	9630033F20Rik	Tkt	Ptgs1	Ift88	Aifm1	Gpr128	Efcab4b	Shroom3	Fnip2	Tinf2	Klk8	Adcy2	Tenm1	Serpinb9	Ift20	Wnt5a	Rgs3	Slc4a11	Bcap31	Ranbp17	Ranbp17	Tomm34	Neu2	Gm9193	Tek	Akr1d1	Ranbp17	Sbf2	Exph5	Pdk3	Ankrd26	Xrra1	Spag5	Traf6	Tnfsf8	Pde5a	Tek	Lax1	Thpo
Symbol_76	Higd1a	Enpp7	Wnt5a	Ifna13	Stat5b	Adcy2	Thy1	H2-M10.4	Arl3	Ercc4	Usp44	Tpi1	Ptgs2	Thbs1	Vcp	Gpr133	Scn4b	Limd1	Casp16	Dna2	Nfasc	Rln3	Spry2	Spn	Arl3	Vps52	Rgs11	Slc9a3r1	Tnfsf15	Snupn	Snupn	Mrpl18	Tshz3	Crnkl1	Adap2	Hmgcs1	Snupn	Dhps	Cadps2	Ppp1r3b	Helt	Chek2	Arl2	Wnt5a	Tnfsf4	Nfkbid	Tgfb2	Tlr2	Tlr4
Symbol_77	Scoc	Aadat	Zfpm1	Gm13280	Slc25a38	Rln3	Slc4a7	H2-M11	Dstn	Elane	Nell1	Eno4	Trpv1	Tsc2	Rps3	Pkd1l3	Akap7	Strip2	Chek2	Npm2	Fa2h	Flcn	Gm12597	Stat3	Cdon	Epb4.1l5	Tmod2	Atp1a4	Dlc1	Sarnp	Sarnp	Mgarp	Ehd2	Luc7l	Tgfb2	Hnf1a	Sarnp	Cngb1	Rab26	Pask	Bbs12	Paxip1	Clip1	Zfpm1	Txk	Axl	Tsc2	Rbck1	Tnfrsf11a
Symbol_78	Mtor	Pebp1	Gadd45g	Ifne	Tal1	Flcn	Twist1	H2-M1	Pdxp	Fbxw7	Slirp	Cps1	Scn10a	Vdr	Hist1h2ba	Cd97	Mink1	Taok2	Bok	Mapk15	Mir24-1	Timp2	Ifna12	Stat5b	Sall1	Zic3	Rgs14	Slc9a5	Bok	Thoc7	Thoc7	Tomm20	Mapk14	Lsm14a	Tsc2	Thrb	Thoc7	Crtc1	Il1rapl1	Pdk4	Bsx	Net1	Stmn4	Gadd45g	Zap70	Vsig4	Twist1	Klre1	Tnfsf11
Symbol_79	Angptl4	Adc	Map2k5	Leprot	Tcea1	Timp2	Vegfa	H2-M10.5	Bin3	Pbk	Atraid	Ppp1r3d	Slc9a1	Wnt10b	Tnfsf15	Cartpt	Pla2g6	Brwd3	Sfn	Acd	Mir138-1	Ucn	Bcar3	Il20rb	Evc	Dchs1	Ramp1	Slc24a5	Ifi27	Magohb	Magohb	Mul1	Eif5a	Fam103a1	Twist1	Tnfsf4	Magohb	Cpsf6	Pram1	Lcmt1	Mrap2	Xrcc2	Psrc1	Map2k5	Zfp35	Rhbdd3	Ube3a	Mill2	Vegfa
Symbol_80	Snw1	Slc27a1	Sigirr	Il22ra2	Rcor1	Ucn	Yy1	Rab8b	Ralb	Rev1	Pbk	Aldob	Tac1	Wnt5a	Tmprss9	Pcsk1n	Cacng3	Dlc1	Nupr1	Fbxw7	Mir140	Vip	Ifnz	Tac1	Tctn1	Megf8	Ramp2	Pkd2l1	Mtch1	Chtop	Chtop	Tomm5	Hif1an	Gemin6	Ube3a	Vldlr	Chtop	Txnrd1	Rph3al	Soga1	Ceacam2	Pmaip1	Trim54	Sigirr	Zbtb7b	Gimap5	Pik3c3	Mapk1	Gpr55
Symbol_81	Trim13	Sptlc1	Tlr2	Sh2b2	Tgfbr3	Vip	Grk1	H2-M5	Gtpbp8	Noc2l	Banp	Neu2	Tacr1	Xdh	Dlc1	Npsr1	Cacng4	Prpf40a	Ikbke	Chek2	Mir195	Vipr2	Fnip2	Mylk3	Skor2	Mixl1	Ramp3	Slc5a6	Lrdd	Mrpl18	Mrpl18	Micu2	Ep300	Snrpd3	Pik3c3	Soat2	Mrpl18	Samhd1	Pla2g6	Irs2	Cartpt	Fignl1	Trpv4	Tlr2	Ikzf1	Rc3h1	Gsn	Rnf31	Cib1
Symbol_82	Atg4b	Lpcat2	Il27	Gm12597	Thra	Vipr2	Tsku	Mill2	Snx9	Rad18	Rnf5	Neu4	Nlgn2	Vash1	Bok	Lphn3	Kcnj1	Ccl24	Pmaip1	E2f7	Mir204	Ece1	Gpd1l	Nlrp3	Tctn3	Spdef	Plek	Hcn4	Pmaip1	Ncbp2	Ncbp2	Samm50	Nek5	Patl2	Gsn	Insig1	Ncbp2	Pdss1	Syt7	Mir143	Apln	Rad54b	Ska2	Il27	Tnfrsf14	Pglyrp4	Zp3	Klrk1	Ccl19
Symbol_83	Map1lc3a	Enpp6	Il17f	Ifna12	Timp1	Ece1	Tspan12	Nod2	Chmp3	Pmaip1	Fmn2	Ppp1r3b	Arrb2	Sulf1	Ifi27	Lphn1	Chp1	Cdc42ep4	Pias4	Tspyl2	Mir23b	Gucy1a2	Ifnk	Tnf	Ift172	Smo	Acpp	Gpd1l	Moap1	Ddx39	Ddx39	Smdt1	Camk1	Rpl38	Zp3	Sc5d	Ddx39	Pex14	Syt10	Ppp1r3c	Negr1	Inip	Ska1	Il17f	Gadd45g	Lrrc32	Plxnb1	Ubash3a	Spry2
Symbol_84	Wdr45b	Dhps	Map2k3	Ifnz	Vegfa	Gucy1a2	Fat3	Mill1	Actr2	Trp53inp1	Ptpn3	Gm5506	Tlr4	Ift52	Cpb2	Gpr113	Park7	Parva	Htra2	Pdgfc	Mir27b	Akap6	Ifna14	Tnfrsf11a	1810043G02Rik	Fat4	Rgs19	Atp2b4	Htra2	Nup37	Nup37	Fbxo7	Setd3	Luc7l3	Plxnb1	Scap	Nup37	Pfkp	Rala	Ppp1r3f	Npw	Gtf2h5	Sbds	Map2k3	Fcgr4	Socs6	Hax1	Fcrl5	Nod2
Symbol_85	Snap29	Gm853	Tnfsf15	Ifnk	Ankrd54	Akap6	Ephb1	H2-M10.2	Chmp1b	Ube4b	Mad2l1	Neu3	Tnf	Tinf2	Mtch1	Gipr	Jph3	Fmnl1	Snw1	Gmnn	Mir30a	Akap5	Gm13271	Tnfsf11	Tctn2	Mir203	Rgs17	Scn4b	Arl6ip5	Fyttd1	Fyttd1	Mterfd2	Foxo4	Srsf6	Hax1	Npc1l1	Fyttd1	Dpys	Stx1b	Foxo1	Hcrtr2	Aen	Chordc1	Il19	Il27	Socs5	Hcst	Rc3h1	Mapk3
Symbol_86	Atg12	Pnpla6	Il19	Ifna14	Senp1	Akap5	Bcar3	Raet1e	Klhl13	Tipin	Mtor	Ppp1r3c	Uchl1	Mcc	Lrdd	Gpr114	Rangrf	Cdc42se1	Cdip1	Mcidas	Rnf10	Ostn	Gm13283	Tsc2	Ift80	Nckap1	Akap10	Slc28a1	Fis1	Nup43	Nup43	Mpc2	Rbm38	Snrpg	Hcst	Apob	Nup43	Cutc	Rab9	Mlycd	a	Ino80	Mid1ip1	Card9	Gimap5	Zc3h8	Nyap2	Btnl2	Gpr183
Symbol_87	Cpeb4	Oaz3	Card9	Gm13271	Dyrk3	Ostn	Kdm2b	Ighg2a	Gipc1	Ppid	Prelid1	Pgam2	Vip	A4gnt	Pmaip1	Hcrtr2	Tesc	Sh3kbp1	Pycard	Tipin	Olig2	Gpr161	Gm13289	Tnfsf4	Ssna1	Ccdc39	Rgs20	Slc23a2	Prelid1	Zc3h11a	Zc3h11a	Naif1	Pias1	Rpl24	Nyap2	Cln8	Zc3h11a	Dctpp1	Rapgef4	Mtor	Atp8a2	Babam1	Trim37	Nlrp12	Rc3h2	Pglyrp2	Nyap1	Clec7a	Scimp
Symbol_88	Stx17	Prg3	Nlrp12	Il22	Mfsd7b	Gpr161	Foxe3	H2-Eb2	Spire1	2810417H13Rik	Fbxo5	Pfkp	Aloxe3	Intu	F12	Nms	Shank3	Cdc42ep5	Shisa5	Stoml2	Cntnap1	Mrap2	Gm13272	Vnn1	Evc2	Ahi1	Gsk3a	Slc4a4	Diablo	Pnpt1	Pnpt1	Pnpt1	Ankrd2	Pih1d1	Nyap1	Angptl3	Pnpt1	Thg1l	Rabgef1	C1qtnf1	Uchl3	Tmem109	Camsap3	Elane	Itpkb	Tnfrsf13b	Myo16	Rabgef1	Garem
Symbol_89	Atg3	Azin1	S100a7a	Crlf3	Zfpm1	Mrap2	Ccdc66	Clec4b2	Anln	Ino80	Gipc1	Miox	Dlg2	Cpb2	Perp	Prok2	Jph2	Myl12a	Rps27l	Cdt1	Gal3st1	Gipr	Gm13276	Zp3	Disp1	Sfrp5	Rgs18	Slc13a1	Pycard	Nup93	Nup93	Chchd4	Mtor	Prpf6	Myo16	Idi1	Nup93	Acot13	Scamp5	Slc35b4	Nmu	Nabp2	Cep192	Icosl	Rc3h1	Pdcd1lg2	Slc9a3r1	Lat2	Glipr2
Symbol_90	9430023L20Rik	Pnkd	Elane	Gm13283	Ptbp3	Gipr	Frs2	H2-M10.6	Mitd1	Triap1	Dab2ip	Mlxipl	Mgll	Ghrl	Moap1	Emr4	Mapk8ip2	1810043G02Rik	Nacc2	Ilkap	Mpp5	Adcy1	Gm13277	A2m	Dyrk2	Sall1	Abhd6	Chp1	Anp32b	Nupl1	Nupl1	Plekhf1	Cdon	Prpf31	Slc9a3r1	Idi2	Nupl1	Decr1	Tmem27	Mlxipl	Retn	Rnf168	Tpx2	Prg3	Batf	Cd274	Plch1	Vav3	Nox4
Symbol_91	Trp53inp2	Tdo2	Icosl	Gm13289	Arid4a	Adcy1	Col8a2	Unc93b1	Stambp	Rpain	Rasip1	Akr1a1	Fcgr4	Sav1	Asph	Celsr2	Asph	Myl12b	Aen	Ino80	Zfp191	Rundc3a	Gm13275	Mrgpra3	Fuz	Dact1	Lrrk2	Trpm5	Rps27l	Seh1l	Seh1l	2510003E04Rik	Gsk3a	Gemin7	Plch1	Cyp39a1	Seh1l	Dcxr	Cacna1h	Arpp19	Ghrl	Fam175a	Katnb1	Irf7	Socs5	Ndfip1	Pik3cg	Stoml2	Fbxw7
Symbol_92	Tecpr1	Smpdl3a	Prg3	Gm13272	Ets1	Rundc3a	Mir182	Raet1d	Kif23	Trim32	Nbas	Hibadh	Mapk1	Tnmd	Prelid1	Npff	Kcne1l	Bambi	Steap3	Ciz1	Tsc1	Ramp1	Gm13279	Sigirr	Bbs7	Sav1	Gprasp1	Rangrf	Apopt1	Lrpprc	Lrpprc	Ppp2r2b	Rbm24	Mterfd2	Pik3cg	Mbtps1	Lrpprc	Uxs1	Syt9	Nkx1-1	Prlh	D7Ertd443e	Cyld	Irf3	Elf4	Nrarp	Slc9a3r2	Tespa1	Fgf21
Symbol_93	Fbxo22	Smpd3	Irf7	Gm13276	Mapk14	Ramp1	Mir183	Gm7030	Ist1	D7Ertd443e	Dhx34	Pgls	Mapk3	Rgcc	Diablo	Gpr97	Ahnak	Rhou	Tmem109	Ctc1	Afg3l2	Gabbr1	Gm13285	Rhbdd3	Ulk3	Dnaaf1	Rgs8	Tesc	Mul1	Ndc1	Ndc1	Dusp21	Med28	Snrpf	Slc9a3r2	Cubn	Ndc1	Nudt21	Ralb	Fam132a	Ubr3	Nipbl	Specc1l	Tbk1	Rsad2	Peli1	1190002N15Rik	Dusp3	Fgf23
Symbol_94	Slc39a5	Pnpla8	Irf3	Gm13277	Mir122a	Gabbr1	Ahi1	Ifi30	Alkbh4	Uvssa	Mad2l2	Rpe	Ephb1	Ift172	Pycard	Nmu	Sln	Arap1	Triap1	Cdan1	Mir219-1	Ramp2	Gsk3b	Pik3cg	Gpc2	Nipbl	Gpsm1	Asic5	Ppm1f	Xpot	Xpot	Bloc1s2	Nmrk2	Cnot2	1190002N15Rik	Sec14l2	Xpot	Oxa1l	Exoc2	Smek1	Usp46	Ercc8	Slain2	Ghrl	Bcl11b	Samsn1	Dab2ip	Lime1	Pycard
Symbol_95	Slc39a4	Samd8	Tbk1	Gm13275	Mir122b	Ramp2	Irx5	H60b	Cenpv	Ercc8	Lrpprc	Dhdh	Trpa1	Ift74	Anp32b	Npvf	Wwp2	Tbccd1	Dyrk2	Gtpbp4	Mir338	Calcrl	Mlxipl	Cd59b	Hspb11	Clmp	Rgs10	Slc5a7	Fam162a	Iws1	Iws1	Slc35f6	Megf10	Shq1	Dab2ip	Npc2	Iws1	Crtc3	Rab3c	Dyrk2	Ace2	Swi5	Clasp2	Il21	Stoml2	Fbxo7	Stambp	Nfam1	Cysltr2
Symbol_96	Larp1	Sat2	Trem1	Gm13279	Mir125a	Calcrl	Aldh1a3	Gm8909	Cep55	Uaca	Irak3	Adpgk	Nmu	Wfdc1	Plgrkt	Nmb	Gstm7	Myh14	Trim32	Pds5a	Mir34a	Gucy1a3	Gsk3a	Ighg2a	Ttc21b	Rarres2	Klk5	Scn2b	Uaca	Thoc3	Thoc3	Dusp18	Fbxo22	Scaf11	Stambp	Pmvk	Thoc3	Pdss2	Rab3b	C1qtnf2	Ube2q1	4632434I11Rik	Clip3	Rnf128	Nkap	Tnfaip8l2	Prr5l	Phpt1	Bmper
Symbol_97	Nuak2	Kynu	Trem3	Gm13285	Klf13	Gucy1a3	Cdon	Pycard	Actr3	Nfatc4	Ddit4	Pgm2	Acpp	Ift80	Rps27l	Gpr125	Dapk1	Cdc42se2	Uaca	Esco2	Mir100	Gsk3a	Dock7	Elane	Ift57	Mir7-2	Arhgef12	Slc17a7	Ift57	Poldip3	Poldip3	Mff	Pi16	Pan3	Prr5l	Arv1	Poldip3	Cda	Unc13d	Cox11	Gpr39	Nhej1	Clasp1	Cd209b	Mir326	Dusp3	Lime1	Trat1	Rapgef2
Symbol_98	Atg7	Afmid	Ghrl	Clcf1	Foxo3	Gsk3a	Pvrl1	H60c	Map10	4632434I11Rik	Mtmr2	Glyr1	Ptges3	Gkn3	Mul1	Rapgef2	Jsrp1	Fblim1	Nfatc4	Dscc1	Mir219-2	P2ry13	Bag4	Nupr1	Traf3ip1	Mir7-1	Rgs12	Wnk2	Gper1	Rftn2	Rftn2	Them4	Hopx	Rps25	Lime1	Insig2	Rftn2	Pcbd2	Rab2b	Ddit4	Pex13	Ticrr	Bora	Tnfrsf13c	4632428N05Rik	4632428N05Rik	Pik3cb	Skap1	Gper1
Symbol_99	Rptor	Acsl3	Il21	Elp2	Maea	P2ry13	Pvrl3	Rab3c	Rab35	Usp47	Fbxo43	Ctbs	Kcnip3	Dab2ip	Fam162a	Pkd1l2	Scn2b	Arhgap15	Ddit4	Senp2	Mir138-2	Gper1	Ppm1f	F12	Ift46	Ccdc103	Plce1	Slc24a2	Tfap4	Gle1	Gle1	Mcur1	Mamstr	Mtif3	Pik3cb	Tm7sf2	Gle1	Dnm1l	Crisp4	Ppp1r3g	Sgip1	Ints7	Eml4	Tlr9	Sash3	Cyld	Gper1	Clec2i	St5
Symbol_100	Wipi2	Sgms2	Rnf128	Il21	Kmt2e	Gper1	Bhlhe22	Rab32	Myh10	Dtl	N4bp1	Gale	Cacna1h	Wdr77	Ift57	Gpr110	Cnih3	Myh10	Usp47	Ticrr	Mir24-2	Mrap	Smyd3	Ctnnbip1	Cluap1	Nphp3	Usp20	Slc9a8	Dnaja3	Senp2	Senp2	Slc25a12	Hdac9	Pum2	Gper1	Dhcr24	Senp2	Usp16	Stxbp5	Dusp12	Rmi1	Kat5	Gas2l1	Clec2i	Il23a	Tnfrsf21	Pik3ap1	Ube2n	Fgf20
Symbol_101	Fads1	Agmat	Cd209b	Sac3d1	Gas2l1	Mrap	Mir96	Rab3b	Ckap2	Rhbdd1	Niacr1	Shpk	Npvf	Ift57	Dhcr24	Gpr115	Wnk2	Ermn	Bcl2l12	Esco1	Mir146b	Akap12	Mad2l2	Prcp	2700049A03Rik	Foxp4	Gpsm2	Nedd4l	Il24	Rftn1	Rftn1	Mpv17l	Bhlhe41	Rbm5	Pik3ap1	Lmf1	Rftn1	Crtc2	Rab27b	C1qtnf3	Hrh3	Sirt1	Ckap2	Prg4	Dock2	Pag1	Wnt16	Tnfrsf21	C1qtnf3
[truncated: 1 more columns]
