# Supplementary material for: A systems-level approach to parental genomic imprinting: the imprinted gene network includes extracellular matrix genes and regulates cell cycle exit and differentiation
Source: HighWire-hosted journal article supplement (doi:10.1101/gr.175919.114), 2015-01-22
Supplement: Table_S25.xlsx [file Table_S25.xlsx]

## Sheet: Table S25
GO.ID	GO:0051494	GO:0034614	GO:0050864	GO:0014902	GO:0006029	GO:0010821	GO:0051262	GO:0015992	GO:0045995	GO:0007603	GO:0030282	GO:0055088	GO:0006518	GO:0035725	GO:0006997	GO:1901606	GO:0097202	GO:0006767	GO:0072329	GO:0019886	GO:0043473	GO:0002706	GO:0000041	GO:0034754	GO:0050906	GO:0006334	GO:0006892	GO:0090002	GO:0001892	GO:0051591	GO:0001656	GO:0051238	GO:0070507	GO:0055067	GO:0010954	GO:0048515	GO:0002761	GO:0042698	GO:0050714	GO:0050707	GO:0055072	GO:0050921	GO:0043648	GO:0051351	GO:0071887	GO:0000079	GO:0006690	GO:1901568	GO:0008585
GO Term	negative regulation of cytoskeleton organization	cellular response to reactive oxygen species	regulation of B cell activation	myotube differentiation	proteoglycan metabolic process	regulation of mitochondrion organization	protein tetramerization	proton transport	regulation of embryonic development	phototransduction visible light	bone mineralization	lipid homeostasis	peptide metabolic process	sodium ion transmembrane transport	nucleus organization	alpha-amino acid catabolic process	activation of cysteine-type endopeptidase activity	water-soluble vitamin metabolic process	monocarboxylic acid catabolic process	antigen processing and presentation of exogenous peptide antigen via MHC class II	pigmentation	regulation of lymphocyte mediated immunity	transition metal ion transport	cellular hormone metabolic process	detection of stimulus involved in sensory perception	nucleosome assembly	post-Golgi vesicle-mediated transport	establishment of protein localization to plasma membrane	embryonic placenta development	response to cAMP	metanephros development	sequestering of metal ion	regulation of microtubule cytoskeleton organization	monovalent inorganic cation homeostasis	positive regulation of protein processing	spermatid differentiation	regulation of myeloid leukocyte differentiation	ovulation cycle	positive regulation of protein secretion	regulation of cytokine secretion	iron ion homeostasis	positive regulation of chemotaxis	dicarboxylic acid metabolic process	positive regulation of ligase activity	leukocyte apoptotic process	regulation of cyclin-dependent protein serine/threonine kinase activity	icosanoid metabolic process	fatty acid derivative metabolic process	female gonad development
GO Level	7	6	8	8	7	6	8	9	6	8	8	6	6	10	5	10	11	6	9	6	3	7	9	6	7	11	8	8	9	7	9	5	7	8	9	9	11	5	10	10	10	7	8	7	8	12	8	4	9
No. of annotated genes	89	89	90	90	90	90	91	91	91	92	92	93	95	88	89	89	90	90	91	92	92	92	93	95	103	110	87	87	87	87	87	88	89	89	90	90	91	93	93	94	88	88	88	88	89	90	90	90	92
No. of annotated genes with data in Gemma	89	89	89	89	89	89	89	89	89	89	89	89	89	88	88	88	88	88	88	88	88	88	88	88	88	88	87	87	87	87	87	87	87	87	87	87	87	87	87	87	86	86	86	86	86	86	86	86	86
Symbol_1	ARPIN	ROMO1	BTLA	MAMSTR	AGRN	TMEM102	CRTC2	ATP6V1C2	NRARP	RGS9BP	MIA3	GPIHBP1	GSTK1	HCN1	NUP43	IBA57	NLRP3	CTRB2	IDNK	DYNLL2	BLOC1S3	NCR3	SCARA5	SDR16C5	OR52D1	TSPYL6	BLOC1S3	CNST	E2F7	HCN1	HES5	TPCN2	SKA2	SLC9A9	RNF180	H1FNT	SIGLEC15	SOHLH1	NLRP10	NLRP10	SCARA5	TIRAP	ACSF3	CDC26	PTCRA	CCNYL2	PLA2G4F	PLA2G4F	LHX8
Symbol_2	TMSB15B	PXDNL	NFAM1	MKX	CHSY3	MPV17L	APOA1BP	ATP6V0D2	LAMA1	AGRN	RSPO2	PCSK9	GGT6	SLC24A5	H1FNT	IDO2	EGLN3	NMNAT3	TYSND1	AP1S3	BLOC1S2	IL23R	SLC39A5	RDH10	OR51I2	CENPW	STEAP2	LYPLAL1	PLCD3	PPARGC1B	RDH10	DHRS7C	GAS2L2	AQP11	DAB2IP	KLHL10	ZNF675	IMMP2L	PYDC1	SSC5D	STEAP2	S100A14	NAGS	PSMA8	FNIP1	SPDYA	DAGLB	DAGLB	SOHLH1
Symbol_3	GAS2L2	PPARGC1B	RC3H1	RBM24	GXYLT1	FLCN	ATPIF1	ATP6V0E2	AMOT	GPC2	PHOSPHO1	FITM2	PGLYRP2	NALCN	HIST1H2BA	ALDH1L2	NLRP12	MMAB	MMAA	OSBPL1A	FOXD4L1	SH2D1B	ATP6V1C2	RDH12	OR51I1	HILS1	CNST	MYADM	RSPO3	SLC26A6	IRX2	SLC30A8	SKA3	ATP6V0E2	SH3D19	DPY19L2	TMEM64	DMRTA1	SCAMP5	PYDC1	ATP6V1C2	CAMK1D	ALDH1L2	ARRDC4	NFKBID	CCNY	PTGR2	PTGR2	ZFP42
Symbol_4	MTPN	AGAP3	TICAM1	SMYD1	MAMDC2	DYNLL2	CBR4	ATP6AP1L	OSR1	RDH10	OSR1	ACSM2A	GGTLC1	SLC34A3	REEP3	AMDHD1	TBC1D10A	MMAA	CPT1C	KIF2B	BBS5	RSAD2	ATP6V0D2	BCO2	OR51M1	H2BFM	SH3D19	PKDCC	ESX1	DUOX1	OSR1	SLC30A7	SKA1	SLC9A7	PRICKLE1	HIST1H2BA	ZFPM1	PLEKHA1	ZNF384	SCAMP5	ATP6V0D2	IL23A	AMDHD1	NHEJ1	ZC3H8	CCNYL1	FAM213B	FAM213B	TOX2
Symbol_5	PLEKHH2	PLEKHA1	TNFRSF13C	SIK1	HS3ST5	MIEF2	PCBD2	ATP6V1E2	CCSAP	PLB1	OSR2	MIA2	GGTLC2	SLC9A7	WBP2NL	UROC1	MUL1	GSTO2	HOGA1	DCTN5	HPS4	NDFIP1	SLC39A12	STARD5	OR51B6	NAP1L5	AP1S3	NKD2	E2F8	INPP5K	OSR2	LACRT	SPICE1	CYP4F12	SOCS4	TXNDC8	IL23R	RETN	C1QTNF3	C1QTNF3	TMPRSS6	ZNF580	ADHFE1	ANAPC1	BIRC7	HEXIM2	GGT6	GGT6	ARID5B
Symbol_6	ARAP1	DUOX1	TIRAP	PRICKLE1	GPC2	MALSU1	SBF2	COX4I2	OSR2	RDH12	PKDCC	APOA5	SEC11C	SLC4A11	NUP35	ACMSD	MOAP1	SLC52A3	MCEE	RILP	DOCK7	NOD2	SLC39A11	SRD5A3	RGS9BP	SHPRH	LYPLAL1	RAB34	SENP2	NOX4	IRX1	UBASH3B	TMEM67	SLC26A6	LRRK2	DDIAS	ZBTB46	CMPK1	NLRP3	NLRP3	ATP6V0E2	PRKD2	UROC1	MID1IP1	NOD2	MYOCD	CYP2U1	CYP2U1	IMMP2L
Symbol_7	CAPZA3	OSER1	CARD11	DNER	CHST13	OMA1	UXS1	HVCN1	MYADM	PCP2	CREB3L1	ACSM1	HAGHL	WNK2	NEK9	AFMID	PERP	SLC46A1	ACAD11	KIF18A	HPS3	IL21	SLC30A8	ALDH8A1	GNAT3	HIST1H2BA	RAB3IP	AMN	OVOL2	DUOX2	IRX3	CEMIP	KNSTRN	TMPRSS3	OSBPL7	PLD6	PPARGC1B	SPO11	SYTL4	NLRP12	HFE2	CXCL13	MDH1B	TRIB3	SLC46A2	FAM58A	GGTLC1	GGTLC1	DMRTA1
Symbol_8	MYADM	ZNF580	SLA2	BOC	EGFLAM	ATPIF1	CPSF7	SLC4A11	NKD1	OPN4	CD276	NUS1	LONP2	WNK3	POLR1B	HOGA1	NLRC4	NAPRT	LONP2	DYNC2H1	ARL6	CRTAM	ATP6V0E2	STRA6	OR51B5	H1FOO	OSBPL5	WNK3	ZFAT	CARM1	TSHZ3	MCOLN1	PSRC1	SLC4A10	NKD2	TDRD5	FAM213A	SIRT1	NLRP12	IL33	ATP6V1G3	CREB3	ACMSD	ARRDC3	GPAM	CCNB3	GGTLC2	GGTLC2	PLEKHA1
Symbol_9	SCIN	DUOX2	NDFIP1	TANC1	B3GALT6	MTG1	DCTPP1	SLC2A10	HES7	STRA6	FBXL15	C1QTNF3	GGCT	SLC4A5	TSSK6	DTD2	DIABLO	AMN	CYP4F12	KLC2	DTNBP1	GIMAP5	SLC30A7	SCPEP1	LHFPL5	TSPY26P	PKDCC	MPP5	BIRC6	RAPGEF3	LGR4	ERO1L	RAB6C	SLAMF8	RHBDD1	MEI1	DCSTAMP	DMC1	IL33	TLR10	SFXN4	PPM1F	ACOT4	ANAPC11	VIMP	PSRC1	C9orf3	C9orf3	LHX9
Symbol_10	SHANK3	PRDX5	TNIP2	PPAPDC3	CANT1	BMF	TRPM8	NOX5	SOX17	AKR1B10	FAM20C	DGAT2	MRPS9	HCN3	SEH1L	DTD1	PIDD1	SLC25A32	AGXT2	KIF15	C10orf11	TRPM4	ATP6V1G3	PLEKHA1	SDR16C5	H2AFV	DTNBP1	GOLPH3	EGLN1	HCN4	KIF26B	BBC3	STMN4	TMEM165	TBC1D10A	SIX5	NDFIP1	KMT2B	NOD2	NOD2	SFXN2	SLIT2	ADSSL1	MAGEC2	TNFRSF21	CCNL2	PTGES2	PTGES2	RETN
Symbol_11	ESPN	SIRT1	NOD2	BHLHE41	CHST14	MGARP	CRTC3	SLC30A5	GRHL3	CNGB3	MEPE	ABCG8	MRPS26	SLC17A7	NDEL1	SLC25A21	IFT57	SLC19A3	BDH2	DYNC2LI1	ADAMTS20	SASH3	SFXN1	CYP26B1	STRC	HIST3H2A	RAB34	KIF13A	PCDH12	RAPGEF2	WNT4	IBTK	ATAT1	RAB20	PERP	PACRG	PRDM16	ADAMTS1	GOLPH3	GPAM	BTBD9	ARTN	SLC46A1	ANAPC7	PRELID1	CDK5RAP3	CYP4F12	CYP4F12	WNT4
Symbol_12	FHOD3	PARK7	SAMSN1	KIAA1161	IL17F	APOPT1	SRR	SLC2A9	VANGL2	BCO1	ANKH	ABCG5	NOD2	SCN3B	REEP4	GPT2	CYCS	COASY	CYP26B1	DCTN4	HPS6	IL23A	SLC39A13	RETSAT	OR1Q1	TSPYL5	AMN	SPTBN4	LEF1	AKAP6	SIX4	CHERP	CEP76	CLN6	C19orf80	ZFP42	CTNNBIP1	PCYT1B	CRTAM	CRTAM	SLC46A1	SEMA5A	HOGA1	ANAPC5	BBC3	CNTD2	DPEP2	DPEP2	NUPR1
Symbol_13	MAP6D1	PRDX3	IL21	CYP26B1	DSEL	MUL1	PDSS2	TESC	MESP1	RDH11	TXLNG	GPAM	SPCS3	ASIC4	NUP85	ASRGL1	RPS27L	FLAD1	ACOXL	SAR1B	MLPH	EXOSC3	ATP6V1E2	WNT4	OR10A5	HIST1H2BK	TXNDC5	GOPC	NSDHL	AKAP7	APH1A	TRDN	MAP6D1	RAB39A	PLGRKT	ADAD1	KMT2E	SLIT2	IL26	IL26	SFXN5	NRP1	ATCAY	FZR1	NOC2L	CCNL1	ALOXE3	ALOXE3	TIPARP
Symbol_14	MID1IP1	FBLN5	PELI1	MBNL3	GAL3ST3	PINK1	TRPV5	ATP6V1H	WNT4	RDH8	BMP2K	PTCHD2	MRPS35	TESC	NUP37	AGXT2	SENP1	PANK2	CROT	RACGAP1	VPS33A	FOXP3	SLC30A5	BCO1	TMC2	NAA60	GOLPH3	PACS1	SETD2	ADIPOQ	SOX8	AKAP6	BORA	ATP6V1H	BBS7	ZPBP2	TESC	BMP15	NLRP2	NLRP2	SFXN1	TNFSF14	GPT2	ANAPC4	SIRT1	BCCIP	RNPEPL1	RNPEPL1	SPO11
Symbol_15	SPTBN4	KLF2	PCID2	HIF1AN	CHST9	INF2	ACOT13	ATP6V1D	SIX4	AIPL1	LGR4	APOM	CARNS1	BPIFA1	DMRTC2	MCCC2	PYCARD	PPCS	HAO1	KIF26A	RAB17	TBX21	SLC39A8	HSD17B7	TMC1	CENPU	KIF13A	PID1	FOXD3	FOSL1	GREM1	GSTO1	TRPV4	RHCG	AURKAIP1	CAPZA3	IL23A	EIF2B5	GOLPH3L	LGR4	ATP6V1E2	PLA2G7	SLC25A32	ANAPC2	RIPK3	CDK5RAP1	PNPLA8	PNPLA8	ZFPM2
Symbol_16	CORO1B	NET1	PPP2R3C	RBM38	GAL3ST4	GOLPH3	THG1L	ATP6V0A4	SUFU	METAP1	BCOR	C19orf80	BDH2	RANGRF	NUP107	PRODH2	PRELID1	THTPA	CYP39A1	KIF4A	KIF13A	CADM1	TTYH1	HSD17B11	GJA10	CENPO	GOPC	TESC	FBXW8	WT1	NIPBL	F2RL3	MID1IP1	ATP6V0A4	CLN6	TPGS1	LEF1	EIF2B2	CD274	TLR9	MON1A	SCG2	L2HGDH	UBE2S	LILRB1	HERC5	HPGDS	HPGDS	SIRT1
Symbol_17	TRIM54	PPIF	SASH3	CDON	NDNF	MFF	EVL	STOML2	WDPCP	METAP2	ASPN	FBXW7	CNDP2	SLC13A4	GOPC	MCCC1	BBC3	NADK	HACL1	KIFAP3	BLOC1S5	CLCF1	MCOLN1	HSD17B12	GPR98	CENPH	SLC30A6	WNT4	HEY2	WNT10B	SIX2	AP3D1	CAMSAP3	NOX1	NUB1	NUP210L	IL20	EIF2B4	PYCARD	TLR8	SLC25A28	WNT5A	PRODH2	FBXO5	TRAF3IP2	SERTAD1	SIRT1	SIRT1	ACSBG1
Symbol_18	CDK5RAP2	IL18BP	MZB1	MYEF2	CHPF	PARL	DCXR	UQCR10	RPS6KA6	GNB5	WNT4	LAMTOR1	GSAP	SLC24A2	KDM3A	CCBL2	NGFRAP1	NMNAT1	PLA2G15	SEC31A	C12orf10	ABCB9	SLC39A10	RDH11	RTP3	CENPK	KIF16B	INPP5K	HEY1	VGF	BASP1	SLC30A4	SLAIN2	CLIC4	IFT52	RHBDD1	ACIN1	SGPL1	RGCC	FOXP3	SFXN3	VEGFC	CCBL2	PSME4	SIVA1	ANAPC2	PTGR1	PTGR1	DMC1
Symbol_19	INPP5K	HDAC6	EXOSC3	EHD2	NDST4	PID1	CUTC	ATP5S	NPHP3	GPC6	ATRAID	ANGPTL4	GLRX2	NEDD4L	NUP133	THNSL2	CYFIP2	MCCC2	AMACR	DCTN3	SHROOM3	PAXIP1	TRPC7	RDH8	TAS1R1	TSPYL2	AP1AR	GOLGA7	NCOA6	THBD	SPRY1	SLC30A3	TRIM54	RAB38	PACSIN3	ZMYND15	LILRB4	NCOA1	CHIA	CD274	NDFIP1	VEGFB	CMPK1	UBE2C	PDCD7	RGCC	MGLL	MGLL	FST
Symbol_20	LIMA1	CCS	FOXP3	SOX8	CHST8	SLC35F6	GNMT	NOX1	TENM4	SDC3	SBDS	MLXIPL	SPCS1	GPD1L	NDC1	PDPR	FAM162A	AASDHPPT	LPIN1	KIF3A	ADAMTS9	ZBTB1	SLC30A10	DKK3	TAS1R2	CASC5	BLOC1S4	EHD3	PLAC1	TEK	GDF11	SLC30A2	RCC2	NEDD4L	TRIB2	TSSK6	LILRB1	FZD4	ANKRD1	PYCARD	CYBRD1	VEGFA	AADAT	ANAPC10	BCL2L11	CNPPD1	CYP4F8	CYP4F8	KMT2B
Symbol_21	SPTBN5	PRDX6	TBX21	NMRK2	XYLT2	MARCH5	SAMHD1	SLC17A5	NIPBL	GUCA1C	GREM1	MYLIP	OPLAH	SCN11A	RRN3	FAM206A	MTCH1	PPCDC	ACOT7	KIF2C	MREG	RIPK3	SLC39A9	TIPARP	OR51B4	CENPN	WIPI1	PACSIN1	PLK4	STC1	ADIPOQ	TRPC1	CENPJ	SLC9A8	CYFIP2	TSSK1B	TOB2	NRIP1	CLEC4E	RGCC	STEAP4	THBS4	HAAO	PSMD14	RAPGEF2	LATS2	PTGES3	PTGES3	ADAMTS1
Symbol_22	SBDS	KLF4	TNFRSF21	ANKRD2	XYLT1	MIEF1	PDSS1	ATP6V0A2	GPR161	NMT2	GPNMB	TMEM97	PNKD	CHP1	NUP54	PIPOX	BCL2L13	MCCC1	SLC27A2	SEC24A	BLOC1S4	MALT1	STEAP3	STARD3	RTP4	H2AFJ	RAB14	RANGRF	CITED2	STAT1	SLIT2	HSP90B1	CDK5RAP2	CHP1	FBXO22	JAM3	HAX1	VGF	PANX1	TNFRSF21	HAMP	THBS1	QPRT	TOPORS	AURKB	GTPBP4	PDPN	PDPN	PCYT1B
Symbol_23	SHANK1	SPHK1	CLCF1	FBXO22	BCAN	TRIAP1	CRTC1	NNT	PLCB1	DHRS3	ZBTB40	ANGPTL3	BACE1	SLC17A3	GOLM1	AADAT	CARD8	LMBRD1	SLC27A4	DCTN6	BBS7	LILRB1	FTHL17	PPARGC1A	CHRNA10	ASF1B	GOLGA7	ARHGEF16	TRIM28	STAR	ITGA8	THY1	SBDS	UTS2	RCHY1	SPACA1	IKZF1	VEGFA	CADM1	C5AR2	TTC7A	TGFB1	ME3	PSME3	DNAJA3	MAPRE3	PRG3	PRG3	SLIT2
Symbol_24	VILL	AKR1C3	TNFRSF13B	PLCB1	CHST7	SH3GLB1	NLGN1	PARK7	SULF1	LRAT	MINPP1	ABCA12	DNPEP	SLC34A2	SYCP3	DMGDH	NLRP1	VNN3	SLC25A17	DCTN2	LEF1	CD226	ATP6V1H	DHRS2	LXN	H2AFY2	BLOC1S6	LDLRAP1	DNAJB6	SREBF1	PAX8	TGFB1	STMN3	CORIN	HSPBP1	PANK2	FSTL3	UBE3A	CLEC5A	CHIA	MCOLN1	ADAM17	FTCD	PSMD6	BCL10	CDC37	PTGES	PTGES	BMP15
Symbol_25	EML4	EPX	PAXIP1	P2RX2	SULF2	FIS1	CPSF6	CHP1	KDM1A	SLC24A1	EIF2AK3	LDLRAP1	SEC11A	SLC9A6	HIPK2	ACAD8	ANP32B	RFK	ECI2	SEC23A	SLC45A2	THOC1	ATP6V1D	DHRS9	OR2S2	HJURP	RAB26	APPL1	HAND1	SPARC	NPHS2	SRI	RACGAP1	SLC9A6	FBXW11	SLC26A6	LRRC17	TYRO3	EXPH5	CLEC4E	BDH2	CXCL12	ALDH1L1	PSMF1	FADD	HEXIM1	MAPKAPK2	MAPKAPK2	EIF2B5
Symbol_26	INPP5J	PXDN	IKZF3	EHD1	CSGALNACT1	STOML2	NUDT21	ATP5L	DKK1	RGS9	KL	SIRT1	ETHE1	SLC17A2	TOR1B	HIBCH	GNB2L1	NADSYN1	AKR1A1	IFI30	FOXD3	IL27RA	SLC25A37	DHRS3	CHRNA9	MIS18BP1	MACF1	CLIP3	HS6ST1	SLC8A3	WT1	SNCA	EML4	ATP6V0E1	TRIM32	DMRTC2	CARTPT	NKX2-1	CARD8	PANX1	STEAP3	XCL1	ACOT8	BTRC	RIPK1	CCNO	SPHK1	SPHK1	EIF2B2
Symbol_27	CKAP2	TRPC6	CD300A	TRDN	CHST12	PYCARD	DHRS4	ATP5H	DMRT2	AKR1C3	CER1	EHD1	NCSTN	SLC17A4	AHCTF1	DDAH1	DLC1	PNPO	ACOT8	SEC24B	VPS33B	NCR1	CUTC	LRAT	TAS2R5	CENPQ	SCFD1	RAB26	SOCS3	SLC6A3	WNT9B	SLC8A1	INPP5J	CYP4F2	PLK2	CCNB1IP1	ADIPOQ	TIMP4	NLRP1	CADM1	FTHL17	CXCL11	NR1H4	CDC16	IRS2	CCNE2	AKR1C3	AKR1C3	EIF2B4
Symbol_28	CLIP3	TPO	TNFSF13B	KLHL41	CSGALNACT2	COA3	USP16	TCIRG1	GNB2L1	LRP8	AXIN2	NPC2	UNC13A	HCN4	SUN2	DDAH2	NOD1	MOCOS	ADIPOQ	ACTR1A	BLOC1S6	FADD	ATP6V0A4	CACNA1H	TAS2R14	H2BFS	VPS13A	MACF1	NCOA1	SLC5A5	WNT7B	XCL1	CHORDC1	RAB7A	MGEA5	GOPC	GPR55	TGFB3	GLMN	CLEC5A	ATP6V1H	CCL21	GRHPR	CDC23	NR4A3	CCNB2	PLA2G4C	PLA2G4C	SGPL1
Symbol_29	CLASP1	TPM1	VAV3	HDAC5	IMPAD1	PRELID1	AASS	PPIF	RBM19	TTR	FGF23	COL4A3BP	ADAMTS13	SLC23A1	NUP62	HAAO	BCL2L11	PANK1	IRS2	ACTR1B	SNAPIN	TNFSF13	SLC40A1	SGPL1	TAS2R10	MIS18A	MON2	RHOQ	GCM1	SFTPC	UMOD	CXCL11	CKAP2	UPK3A	GNB2L1	CASC5	INPP4B	TGFB2	DNM1L	CARD8	ATP6V1D	CCL19	KYNU	CDC14B	WNT5A	LATS1	CYP4F2	CYP4F2	FZD4
Symbol_30	KANK1	TNFAIP3	THOC1	MAML1	CHPF2	BBC3	DNM1L	VPS9D1	CELSR1	SDC4	WNT11	NR1H3	TMED10	SLC4A7	NUP188	GCAT	BCL2L10	CD320	ALDH4A1	AP1M2	SZT2	TNFSF4	SLC39A2	ALDH1A2	TAS2R13	RSF1	RAB31	PACS2	EOMES	SDC1	TFAP2B	CCL21	SENP6	TTPA	STUB1	RNF17	FADD	TAF4	TNFSF15	NLRP1	SLC25A37	CCL7	SUCLA2	CUL1	VHL	PKMYT1	PLA2G10	PLA2G10	NRIP1
Symbol_31	CLASP2	PRDX2	IL27RA	HDAC4	CYTL1	FAM162A	MTMR2	ATP5J2	ADIPOQ	SDC2	WNT10B	NR1D2	CPQ	SLC9A3R1	PES1	HIBADH	PDCD6	PSAT1	CYP4F2	SEC24D	HPS5	TRAF6	SLC39A1	AKR1C3	TAS2R7	HP1BP3	RAB10	PKP3	NCOA3	REN	TFAP2A	CCL19	CLIP3	TFAP2B	TRIB1	KDM3A	RIPK1	STAT5B	RPH3AL	GLMN	SLC22A17	CCL5	SUCLG1	AXIN1	TP53	DIRAS3	TNFRSF1A	TNFRSF1A	WT1
Symbol_32	MAPRE1	STAT6	TNFSF13	HDAC9	CHST15	MTG2	TP63	ATP6V1G1	KLF4	SDC1	TWIST1	ABCG1	SPCS2	ASIC3	CTDNEP1	SDS	CASP8AP2	MOCS3	ACOX3	SEC24C	EDAR	TRAF2	ATP2C1	HSD17B6	TAS2R8	ASF1A	VAMP5	RAB31	TFEB	RELA	TCF21	S100A9	CLASP1	TACR1	KCNE2	STRBP	TNFSF11	STAT5A	AIM2	LILRB1	ATP6V0A4	CCL4	SUCLG2	XRCC4	TGFB2	CDK5R2	TLR2	TLR2	VGF
Symbol_33	TWF2	SOD3	IRS2	HOMER1	SPOCK3	YWHAQ	ALDH5A1	COX5A	TBX18	SAG	TUFT1	NCOR1	BECN1	SLC24A1	SUN1	FTCD	TNFSF15	MMADHC	ACOX2	KIF23	BCL2L11	TNF	SLC39A6	HSD17B8	TAS2R9	PADI4	EXOC5	TMED2	FZD5	RAP1B	HNF1B	S100A8	CLASP2	TAC1	IST1	PCSK4	THOC5	SOD1	IL1RL1	BTN2A2	SLC40A1	CCL2	ALDH4A1	UBE2N	ADAM17	CCNA1	TBXAS1	TBXAS1	VEGFA
Symbol_34	CORO1A	SOD2	TNFRSF4	DYRK1B	CHST11	MLLT11	VASP	SLC9A3R1	FZD7	RS1	CLEC3B	SLC25A27	ALDH5A1	PKD2L1	SYNE1	ALDH1L1	EIF2AK3	TPK1	ALDH5A1	KIF3B	FIG4	TGFB1	ATP6V0A2	UGT2B7	TAS2R1	KAT6B	ARFGEF2	RAB10	WNT7B	RAP1A	STAT1	S100A7	TPX2	SLC11A1	SOCS5	HOOK1	OGT	SLIT3	TNFRSF14	TLR6	FLVCR1	S100A7	KMO	UBE2E1	STAT5A	CDK5R1	SYK	SYK	UBE3A
Symbol_35	TRIOBP	SOD1	TNFSF4	CACNA1H	DSE	PPARGC1A	TP73	ATP6V1F	FZD1	RPE65	KLF10	LIPG	XPNPEP1	SLC4A4	NUP160	AASS	AIFM1	MMACHC	TWIST1	AP1M1	RAB11B	TAP2	SLC39A14	UGT2B4	TAS2R16	ITGB3BP	LYPLA1	VAMP5	WNT2	PTPRN	SOX9	RYR2	MAPRE1	SLC9A5	BTRC	YBX2	TYROBP	SFRP4	ADAM9	TNFSF15	STEAP1	RARRES2	DDO	UBE2D1	SIGLEC1	KAT2B	SSTR4	SSTR4	UBC
Symbol_36	STMN2	SLC8A1	TNFAIP3	CFLAR	B3GAT1	SIVA1	TP53	COX7A2L	WNT2B	RP1	TGFB3	DGAT1	THOP1	ABCB11	NUP210	KYNU	DNAJA3	QPRT	SULT2A1	AP1S2	USP13	TAP1	LMTK2	TTR	TAS2R4	TSPYL4	ARFRP1	MYL12A	VCAM1	PLAT	SMO	RYR1	CEP250	SLC9A3	FADD	DHH	TRAF6	SFRP1	HYAL2	ATG5	FBXL5	PTPRJ	LIPF	UBC	CXCL12	CCNK	RNPEP	RNPEP	TAF4
Symbol_37	TMSB15A	SFTPC	TLR4	BARX2	B3GAT3	VAT1	TK1	ATP6V0D1	WNT5A	RLBP1	TGFB1	IRS2	TAPBP	YWHAH	SYNE2	ALDH4A1	TNFRSF10B	NMNAT2	AKR1D1	CTSF	AP3D1	MAP3K7	SLC30A9	SULT1A1	TAS2R3	OIP5	OPTN	SORBS1	TTPA	PLA2G5	SIX1	PTPRC	STMN2	SLC9A2	ADAM9	SYCP3	TNF	ROBO2	WNT5A	AIM2	ATP6V0A2	PRKD1	ALDH5A1	UBB	CCL21	TNFAIP3	PTGS2	PTGS2	STAT5B
Symbol_38	AVIL	RELA	TGFB1	ADAM12	GLCE	ACAA2	TGM3	ATP6V0E1	WNT2	GRK1	TFAP2A	SOAT2	SOD2	UTRN	PSME4	KMO	FADD	SLC19A2	SCP2	DYNLL1	AP1M1	SUPT6H	TCIRG1	SULT1E1	OR4D1	ANP32B	SCAMP3	CIB1	NR2F2	PKLR	SHH	PRKCE	PLK2	SLC9A1	PIAS1	DDX25	TLR4	PGR	VEGFC	IL1RL1	TCIRG1	PRKCA	TH	UBA52	CCL19	NR2F2	PTGS1	PTGS1	STAT5A
Symbol_39	GAS2L1	PXN	TCF3	WNT10B	HYAL4	LRPPRC	SOD2	UQCRH	WNT1	RHO	TCF7L2	PLA2G10	SOD1	TRAPPC10	NUP205	DDO	TNFSF10	AKR1A1	PEX5	RAB7A	RAB11A	STAT6	COX17	STAT5B	OR7A5	CHAF1A	SCAMP2	LYPLA1	STK4	PFKFB1	SALL1	PRKACA	PLK4	SLC4A3	OGT	AFF4	TLR3	PDGFRA	NR1H2	TNFRSF14	ABCB6	PDGFRB	TAT	SKP1	CCL5	TFAP4	PTGIS	PTGIS	SOD1
Symbol_40	ARFGEF1	PTPRK	SYK	WNT1	SULF1	PPIF	SHMT2	UQCRC1	PHLDA2	RDH5	STATH	MALL	REN	SNTA1	ANKLE2	TDO2	CRADD	GPHN	PEX2	TRAF6	AP3B1	STAT5B	ABCB6	STAR	OR10A3	H2AFY	AP1M2	GNB2L1	SPINT1	PDE4D	ROBO2	PLN	GAS2L1	SCNN1G	AXIN1	GAPDHS	KLF10	PAM	TNFRSF4	HYAL2	HEPH	PDGFB	STAT5B	RPS27A	RORC	ADAM17	PTGDS	PTGDS	SLIT3
Symbol_41	CIB1	MAPK7	SUPT6H	THRA	SLC35D1	DNM1L	SHMT1	UCP3	NR2C2	RCVRN	SOX9	USF2	PSEN2	SLC20A2	NUPL2	TAT	RIPK1	NAMPT	ABCD3	SPTBN2	ATRN	STAT5A	SCO2	AKR1D1	OR8B8	H1FX	DOPEY2	RAMP3	SP3	PDE3A	RET	PLCG2	SPAG5	SCNN1B	IFT88	CABYR	TFE3	OXTR	TNFSF4	WNT5A	ATP6V1G1	SERPINE1	STAT5A	PTEN	RAG1	PTEN	MAPK9	MAPK9	SFRP1
Symbol_42	DLC1	PRKAA1	STAT6	TGFB1	CHSY1	BCL2L11	CCL5	UCP2	TGIF1	RBP4	PTN	USF1	PSEN1	SLC20A1	NEK6	SHMT1	TRADD	SLC23A1	PRODH	SH3GL2	MKKS	SPN	CCS	SRD5A2	OR8G2	HIST1H2BJ	DNAJC6	ARFRP1	SP1	PAX4	PTCH1	PKD2	CIB1	SCNN1A	USP5	SPO11	TAL1	NPY5R	TWIST1	TNFRSF4	ABCG2	NTRK3	STAR	PSME2	PTEN	PSMD10	PLA2G5	PLA2G5	ROBO2
Symbol_43	KATNB1	PKD2	STAT5B	TBX3	B4GALT7	LONP1	S100A10	UCP1	HNF1B	RBP3	PTH1R	NR1H2	PCSK5	SLC12A3	NUP50	QDPR	XDH	SLC23A2	PPARD	SEC13	ZIC2	XCL1	HEPH	SRD5A1	OR2M4	HIST1H2AG	PUM1	OPTN	SNAI1	OXT	POU3F3	PDE4D	KATNB1	SCN7A	WFS1	TSSK2	STAT5A	NOS3	TNF	TNFSF4	ATP6V1F	NTF3	SLC19A1	PSME1	PRKCQ	PROX1	PLA2G4A	PLA2G4A	PITX2
Symbol_44	WASF2	PDK2	STAT5A	TBX1	LECT1	IER3	RYR3	TWIST1	TBX2	RBP2	PTGS2	SREBF2	PCSK1	SLC9A5	ZMPSTE24	PRODH	VCP	GSTO1	PPARA	LGMN	TYRP1	PVRL2	ATP6V1G1	SHH	OR1C1	HIST1H3F	CLINT1	TMEM59	SLC8A1	NME1	PKD2	P2RX7	PARP3	PPT1	VCP	PSME4	SFRP1	NHLH2	TLR2	TWIST1	ATP6V0D1	MET	SLC1A3	PSMD13	PIP	PLK1	PLA2G1B	PLA2G1B	PGR
Symbol_45	HDAC6	PAX2	SFRP1	SOX9	HPSE	TNFSF10	RRM2	SURF1	SNAI1	RBP1	PTH	SOAT1	PAM	SLC9A3	USPL1	PPAT	TRAF2	RGN	PON3	KIF22	TYR	PVR	ATP6V1F	SCP2	ASIC3	RUVBL1	SCAMP1	NRXN1	MAP2K1	NDUFS4	PKD1	CXCL9	HDAC6	SLC26A4	SUMO1	MAST2	RB1	MSH4	TGFB3	TNF	ATP6V0E1	SMAD3	SHMT1	PSMD12	P2RX7	PKD2	ABCC1	ABCC1	PDGFRA
Symbol_46	PICK1	PRDX1	PTPRC	SKI	CSPG5	HRK	RRM1	SLC15A2	SIX1	PRKCQ	SRGN	ACSM3	FURIN	SLC9A2	NUP153	PCBD1	TNF	NFS1	PHYH	KIF11	TH	PTPRC	RAB11B	REST	PKD2L1	SMARCA5	VAMP3	VAMP3	MAPK1	CITED1	PDGFRB	LYN	ROCK2	PDK4	UBE2V2	FNDC3A	RARA	MMP19	TGFB2	TLR4	HYAL2	LBP	SDHB	PSMD11	MIF	PKD1	MIF	MIF	NOS3
Symbol_47	SLIT2	NFE2L2	PTPN6	SHOX2	UST	DYNLL1	RPS19	SLC15A1	SHH	PRKCA	PHEX	PEX2	MME	SLC9A1	POM121	PAH	SNCA	SLC5A6	PEX13	KLC1	SOX10	PTPN6	ATP6V0D1	RDH5	TRPA1	HIST1H4G	AP4M1	VAMP4	MED1	MMP19	PDGFRA	LCK	AURKB	PDK2	TNFRSF1B	INSL6	PTPN2	MMP14	TGFB1	TLR2	TFRC	KDR	SDHA	PSMD10	KITLG	PIM1	MGST2	MGST2	MSH4
Symbol_48	AURKB	MT3	PAWR	SHH	GPC6	PLA2G6	PEX5	SLC9A1	SFRP5	PPEF1	ENPP1	PRKAA2	MGST2	SLC8A1	NUPL1	OGDH	S100A9	VNN1	PEX7	KIF5A	SOD2	PRKCZ	ATP6V0E1	RBP4	OR6A2	HIST2H2BE	AP1M1	BLZF1	PLG	KCNQ1	PDGFB	ITPR1	ARHGEF2	OXT	TNF	DMC1	PRKCA	LHCGR	SYK	TLR1	TFR2	ITGA2	ALDH18A1	PSMD9	MEF2C	PDGFB	LTC4S	LTC4S	MMP19
Symbol_49	ARHGEF2	MPV17	NFATC2	SORT1	HS3ST3B1	ZNF205	PPAT	NDUFA4	SFRP2	PNLIP	P2RX7	PRKAA1	MGST1	SLC3A2	NUP93	NOS3	S100A8	VNN2	PCCB	KIF3C	SNAI2	PPP3CB	SLC39A7	MED1	MKKS	HIST1H2BO	AP1S2	PPFIA1	PLCD1	KCNE1	PDGFA	CXCL10	CDK5R1	NPR1	CLEC3B	ZPBP	PIK3R1	LFNG	CCL19	SYK	TF	CXCL10	PRODH	PSMD8	LYN	MNAT1	CYP4F3	CYP4F3	MMP14
Symbol_50	TMSB10	MPO	MNDA	RYR1	HS3ST4	YWHAZ	PFKL	IL13	SFRP1	PDE6B	DDR2	PPARG	LTA4H	SCNN1G	NUP155	NOS2	RPS3	PDXK	PCCA	KIF2A	PMEL	P2RX7	SLC30A4	PDGFRA	OR2H2	HIST1H2BC	NAPA	PIP5K1A	PKD2	JUNB	PAX2	IL13	XPO1	NPPB	CNTN2	EHMT2	PF4	LEP	SAA1	CCL19	SRI	IL16	PCK2	PSMD7	JAK3	MEN1	LTA4H	LTA4H	LHCGR
Symbol_51	TMSB4Y	MET	MIF	PPP3CA	SDC3	YWHAH	PEX14	IL4	PTK7	PDE6G	NFE2	POLD1	IDH1	SCNN1D	TBPL1	NOS1	ROBO1	TKTL1	MUT	HLA-DRB4	RAB27A	SH2D1A	SLC30A3	LHB	BEST1	HIST1H2BH	SNAP23	VAMP7	PKD1	JUN	NKX3-1	HTR2C	TPR	MC3R	TAF1	CELF1	NME1	KIT	RBP4	SAA1	SOD2	CXCR2	PCK1	PSMD5	IRF7	HSPA2	FADS1	FADS1	LFNG
Symbol_52	PPFIA1	MAP3K5	MEF2C	PITX2	CHST3	YWHAG	PCBD1	DRD4	MAP2K5	PDE6C	NELL1	PKP2	IDE	SCNN1B	CCNB2	IVD	RET	SLC25A16	LIPE	HLA-DRB1	MAP2K1	LTA	SLC30A2	KCNMA1	SOX2	HIST1H2BM	GBF1	SPTBN1	PDGFB	ITPR2	NF1	HTR2B	TERF1	MAFG	SUMO2	CIB1	NF1	KISS1	PTGER4	TRIM27	SOD1	CXCL8	PC	PSMD4	IRF3	HHEX	HPGD	HPGD	LEP
Symbol_53	VIL1	MDM2	LYN	NPHS1	HS6ST1	YWHAE	OXA1L	DRD3	MAPK7	PDE6A	MMP13	NPC1	HAGH	SCNN1A	MAP7	IDO1	PPARG	CUBN	LEP	HLA-DRA	POMC	LAG3	SLC30A1	HSD17B4	SLC12A2	HIST1H2BN	VAMP4	S100A10	NODAL	IGFBP5	MYC	HTR2A	TBCD	KNG1	PTEN	REC8	MYC	KDR	PRKCZ	PTGER4	SLC11A1	IL6R	OGDH	PSMD3	IDO1	GTF2H1	GPX4	GPX4	KIT
Symbol_54	TMSB4X	LPO	INPP5D	NOTCH1	NDST3	YWHAB	ME1	CYB5A	PPP2R3A	NMT1	MGP	LRP5	GSTZ1	SCN10A	BANF1	HPD	PML	TCN2	IRS1	HLA-DQB2	PAX3	IL12RB1	TFRC	HSD17B3	RBP4	HIST1H2BL	VAMP8	RAB13	NFE2	RAPGEF1	CITED1	HRC	AURKA	KCNMA1	PSMD10	CEP57	MITF	INHBB	PPID	PRKCZ	SLC11A2	IL6	MTRR	PSMD2	IL10	SFN	GPX1	GPX1	KDR
Symbol_55	TBCD	LCN2	INHBA	NOS1	NDST2	TP53	LRP4	COX15	PAX3	LRP2	MEF2C	LPL	GSTT1	SCN9A	RAE1	HMGCL	PMAIP1	TCN1	IDUA	HLA-DQB1	OCA2	IL12B	TFR2	HSD17B1	PPEF1	HIST1H2AB	BLZF1	PTCH1	CITED1	GPD1	SMAD4	GSTM2	SPAST	KCNJ10	PSEN1	SPAG6	KITLG	INHBA	PPIA	SRGN	NEO1	HSPB1	MTHFR	PSMD1	CXCR2	FGF10	GGT5	GGT5	INHBB
Symbol_56	AURKA	IL6	INHA	NEO1	TCF7L2	TFDP1	KCNJ12	COX11	OTX2	LRP1	MATN1	LIPC	GSTP1	SCN8A	AAAS	HGD	P2RX1	SLC19A1	HSD17B4	HLA-DQA1	GPR143	IL12A	TF	HSD3B2	PPEF2	HIST1H2AC	STX7	PRKCI	MDFI	FOSL2	LIF	GPER1	SNCA	KCNJ2	PLK1	TBPL1	LYN	INHA	PLA2G1B	P2RX7	NUBP1	NCKAP1L	MTHFD1	PSMC6	IL6	EGFR	GGT7	GGT7	INHBA
Symbol_57	SPTBN2	HP	IL13RA1	NACA	SGSH	PSMD10	KCNJ10	COX10	NOTCH1	LPL	SMAD3	LDLR	GSTM5	SCN5A	NUP214	HDC	SLC11A2	SLC2A3	HADH	HLA-DPB1	NF1	IL10	TCN2	HSD3B1	PIP	HIST1H2AK	AP3B2	PPP2R5A	LIF	FOSB	LHX1	CXCR3	CLIP1	KCNH2	FURIN	QKI	LTF	ICAM1	P2RX7	MIF	MYC	CXCR3	ME2	PSMC5	IL2RA	GADD45A	GGTA1P	GGTA1P	INHA
Symbol_58	SPTBN1	HGF	IL13	MYOG	SDC4	MAPK8	KCNJ2	COX8A	NODAL	LDLR	NBR1	LCAT	GSTM4	SCN4B	VRK1	HAL	NKX3-1	SLC2A1	HADHB	HLA-DPA1	MYO7A	IL7R	TCN1	FSHB	PIGR	HIST3H3	VAMP7	PIK3R1	KRT19	FOS	LAMB2	XCR1	RNF4	KCNA5	NRD1	TRIP13	LIF	GNRH1	MIF	LYN	MFI2	GAS6	ME1	PSMC4	IL2	CKS2	GGT3P	GGT3P	IDH1
Symbol_59	SPTB	HBB	IL10	MYOD1	SDC2	PPP3R1	INSR	COX7B	NFE2L2	HSPG2	LTF	INS	GSTM3	SCN4A	SUMO1	GSTZ1	MAP3K5	SHMT1	HADHA	HLA-DOB	MYO5A	IL4	SLC11A1	FGF2	SERPINE2	CHAF1B	VAMP2	PDZK1	KRT8	PTK2B	CXCR2	FTH1	RGS2	UTS2R	MFI2	PIWIL1	JUN	GDF9	KCNN4	IRF3	LTF	FIGF	MDH2	PSMC3	IFNG	CKS1B	GGT1	GGT1	ICAM1
Symbol_60	SPTAN1	HBA2	IL7	MYH9	SDC1	PPP3CC	IGF1R	COX7A1	LRP6	GUCY2D	LTBP3	HNF4A	GSTM2	SCN3A	TPR	GPT	SMAD3	ABCD4	GOT2	HLA-DOA	CITED1	IL2	SCO1	ESR1	OR3A1	KAT6A	STX4	PDPK1	JUNB	DMTN	IFNG	FKBP1B	RANBP1	EDNRB	MDM2	NEURL1	IRF7	MSTN	IRF3	INS	LCN2	FGF10	MDH1	PSMC2	HIF1A	CDKN3	FCER1A	FCER1A	GNRH1
Symbol_61	SPTA1	GPX4	IL6	MET	PPARD	PMAIP1	IDE	COX6B1	LHX1	GUCY2F	LEP	GOT1	GSTM1	SCN2B	TNP1	GOT2	LCK	PRSS3	MTOR	HLA-DMB	MITF	IL1B	PVRL1	ECE1	OR2C1	TSPYL1	SPTBN1	PALM	ITGA4	EGR4	ID3	FKBP1A	PKHD1	EDN1	SMAD7	RNF8	INPP5D	NR5A1	INS	TNFRSF9	IREB2	PTK2B	IDH3B	PSMC1	HCLS1	CDKN2D	EPHX2	EPHX2	GDF9
Symbol_62	SNCA	GPX3	IL5	MEF2C	IHH	PARK2	HPRT1	COX5B	LFNG	GUCA1B	IGF1	GIP	GSTA4	SCN2A	TMF1	GOT1	JAK2	PRSS1	FABP1	HLA-DMA	KITLG	IFNG	SLC11A2	AKR1C2	OR1D2	TSPY1	SH3GL2	LAMA5	IL10	EGR3	ID2	FGF2	PKD1	DRD3	KLKB1	NME5	INHBA	FSHR	IL13	IL10	HPX	F7	IDH2	PSMB10	GLI3	CDKN2C	EDN2	EDN2	NR5A1
Symbol_63	RDX	GPX1	IL4	KCNH1	IGF1	OPA1	HMGCR	COX4I1	LAMA5	GUCA1A	HIF1A	GCKR	GSTA3	SCN1B	ZNF354A	GLUL	IFNB1	ENPP1	FAAH	FCER1G	MEF2C	IFNB1	MT3	AKR1C1	NTRK1	SOX9	SORT1	KRT18	RBPJ	EGR2	HES1	MS4A2	NPM1	DRD2	IL1B	MKKS	INHA	FSHB	IL10	IL6	HMOX2	F3	IDH1	PSMB9	GAS6	CDKN2B	EDN1	EDN1	FSHR
Symbol_64	TWF1	FXN	IL2	ILK	IDUA	NMT1	HMGCL	ATP5O	LAMA4	GPC1	GPM6B	G6PC	GSTA2	SCN1A	SRPK2	GLUD2	IFI27	PCCB	ETFDH	DNM2	MC1R	IFNA2	MFI2	CYP26A1	LPO	SET	RP2	KIF5B	CYR61	EGR1	HOXD11	PTK2B	NEK2	SLC26A3	IFNG	UBE2B	IL17A	FOXO3	IL6	IL4R	HMOX1	F2RL1	HTT	PSMB8	FCER1G	CDKN2A	DPEP1	DPEP1	FSHB
Symbol_65	PRKCD	FOS	IFNG	IGFBP3	IDS	LMNA	HLA-DRB4	ATP6AP1	LAMA3	GNGT1	GPC3	NR5A2	GSTA1	PKD2	SRPK1	GLUD1	IFI16	PCCA	EHHADH	DYNC1LI2	KIT	HSPD1	LTF	CYP21A2	KIT	BRD2	LLGL1	JUP	HSF1	DUSP1	HOXC11	F2R	NUBP1	CYP11B2	DNAJB2	TNP1	IL12B	FOXC1	IL5	IL1A	HIF1A	MEGF8	HAL	PSMB7	TSC22D3	CDKN1C	AKR1C2	AKR1C2	FOXO3
Symbol_66	PFN2	FOXO1	ID2	IGF1	HYAL1	IGF1	HLA-DRB1	ATP6V0A1	LAMA2	GNB1	GJA1	FGFR4	GSS	NOS1	ATXN7	GLS	HSPE1	PC	ECHS1	DYNC1I2	IHH	HPX	IREB2	CYP19A1	ITGA2	RBBP7	KRT18	GPER1	HES1	SLC26A3	HOXA11	F2	TRIM37	CYP4A11	HPN	TMF1	IL5	FANCG	IL4R	IFNG	HFE	EDNRA	GOT2	PSMB6	DFFA	CDKN1B	CYP4A11	CYP4A11	FOXC1
Symbol_67	PFN1	FER	NCKAP1L	GSK3B	NDST1	HGF	GRIN1	ATP6V0B	INSR	GNAT1	GATA1	FABP4	GSR	FGF12	RPS19	GLDC	HSPD1	MUT	ECH1	DYNC1I1	HPS1	MR1	HFE	CYP17A1	HTR2A	RBBP4	HSPA8	GOLGA4	HIF1A	CYP17A1	GLI3	EDNRA	MAPT	CLN5	HDAC2	STK11	IL4	ETS1	IL2	IFNA2	HTT	EDN3	GOT1	PSMB5	CTSL	CDKN1A	CYP2J2	CYP2J2	FANCG
Symbol_68	PARK2	FANCC	FLT3	GPX1	HSPG2	GZMB	GPX3	ATP6V1E1	IL1RN	GPC3	FGFR2	EPHX2	GPX4	DRD4	RANBP2	GCSH	HIP1	MTRR	DECR1	DYNC1H1	GNAQ	HLA-G	GIF	CYP11B2	HPN	NPM1	GOLGA4	GAS6	GRB2	CYP11A1	GPC3	DRD2	STMN1	CLN3	GPLD1	SRPK1	IFNG	ESR2	IL1A	HTR2B	GDF2	EDN2	GLUL	PSMB4	CCR7	CDK7	CYP2C9	CYP2C9	FANCA
Symbol_69	TRIM37	FABP1	FOXJ1	MTOR	HEXB	GSK3B	GLS	ATP6V1C1	HES1	FNTB	FBN2	AKR1C1	GPX1	DRD3	PVRL2	GCDH	F3	MTR	ECI1	DCTN1	GNA11	HLA-F	FTL	CYP11B1	GRM6	NAP1L4	BLOC1S1	ACSL3	GJB5	CRHBP	GDNF	DRD1	FKBP4	CLCN3	GCLC	SPINK2	ID2	ESR1	IFNG	HLA-DRB4	FTL	EDN1	GLUD2	PSMB3	CLC	CDC25C	CYP2C8	CYP2C8	ESR2
Symbol_70	TACSTD2	ETS1	GPR183	RCAN1	HEXA	GSK3A	GFPT1	ATP6V0C	HNF4A	FNTA	PTK2B	CYP7A1	GLO1	DMD	PPP2R2A	GAD2	F2R	MTHFR	CYP26A1	CTSS	GLI3	HLA-E	FTH1	CYP11A1	GRIN2B	NAP1L3	FTL	EPHA2	GATA2	CPS1	GATA3	DMD	FGF13	CFTR	FGFR4	SOX3	HOXA7	EREG	HTR2B	HLA-DRB1	FTH1	LPAR1	GLUD1	PSMB2	CDKN2A	CDC25A	CYP2C19	CYP2C19	ESR1
Symbol_71	STMN1	EP300	CTLA4	DMPK	GPC1	GPX1	FBP1	ATP6V1B2	FOXA2	GPC5	ERCC2	LYST	GCLM	DLG1	PPP2R1A	GAD1	DAP	MTHFD1	CYP4A11	CTSV	BLOC1S1	HLA-C	FKBP4	CYP3A4	GNAT2	NAP1L2	FTH1	DLG1	GAB1	COL1A1	FOXC2	DIAPH1	FES	CA2	F12	PVRL2	HCLS1	EGFR	GATA3	GATA3	FXN	S1PR1	GLS	PSMB1	CD74	CDC6	CYP1B1	CYP1B1	EREG
Symbol_72	GSN	ECT2	CHRNB2	DMD	GPC3	GPER1	DPYS	ATP6V1B1	GDNF	GPC4	S1PR1	CETP	GCLC	CAV3	PPP2CA	FAH	COL4A3	ABCC1	CRAT	CTSL	FOXD2	HLA-B	DNM2	CYP1A1	GNAT1	NAP1L1	ACSL3	CSK	FGFR2	CNGA3	FOXJ1	DDIT3	EPHA3	C7	EP300	PRKACA	GNAS	CTNNA1	FGR	GAS6	FECH	DSCAM	GCLM	PSMA7	CD27	CCNT2	CYP1A2	CYP1A2	CTNNA1
Symbol_73	FKBP4	DPEP1	CDKN2A	DDIT3	FOXL1	SFN	DHPS	ATP6V1A	GATA3	AKR1C1	ECM1	SCARB1	GGT5	HCN2	PML	SARDH	CDKN2A	MOCS2	CPT2	CTSE	FOXD4	HLA-A	CP	CRABP2	FYN	MCM2	DNM2	CDH1	BPTF	CFTR	FOXD1	CCR7	EFNA5	BCL2	DVL1	SEPT4	GATA2	RUNX1	F2RL1	LRRC32	EPB42	CMKLR1	GCLC	PSMA6	CD3G	CCNT1	CYP1A1	CYP1A1	COL9A3
Symbol_74	FGF13	CST3	CDKN1A	NKX2-5	GPC5	FXN	DECR1	ATP5J	FZD2	CNGA4	CYP27B1	CAV3	GGT7	ATP2B4	PLK1	DLD	CDKN1B	MOCS1	CPT1A	CTSD	EN1	HFE	SLC31A2	COMT	NR2F6	HMGB2	CSK	CAV3	ERF	CDO1	FGF10	CCR5	ECT2	AVPR2	DAB2	PAFAH1B1	FSHB	CAT	F2R	FGR	CP	CCR7	GHR	PSMA5	CASP8	CCNH	CD74	CD74	RUNX1
Symbol_75	EPS8	CRYGD	CD74	MAPK14	GPC4	E2F1	CTH	ATP5I	FGFR1	CNGA3	CCR1	CAV1	GGTA1P	FXYD2	PAFAH1B1	DAO	CCK	HLCS	CNR1	CLTC	EDNRB	FOXJ1	SLC31A1	AKR1C4	EPHB1	HIST1H1A	CLTC	BSG	EPAS1	BSG	FGF8	CLIC2	CYLD	AVPR1A	CSNK1D	OCA2	FOS	CASP2	EP300	F2RL1	ATP6V0A1	CCR4	GGT1	PSMA4	BTK	CCNG1	CBR1	CBR1	CASP2
Symbol_76	DMTN	CDK2	CD40	CEACAM5	EXTL3	DHODH	CRYZ	ATP5G3	FGF10	CNGA1	BMPR2	ASGR2	GGT3P	ATP1B3	NUP98	CPS1	CASP9	GCLC	CEL	CLTA	EDN3	FCER2	CLTC	SCARB1	CST4	H3F3B	CLTA	BCL2L1	EGFR	BRAF	EYA1	CASQ2	CTNNB1	AVP	PLK3	NPHP1	ESRRA	FOXL2	CSF1R	F2R	ATP6V1G2	CCR1	GAD2	PSMA3	BMP4	CCNE1	DAGLA	DAGLA	BRCA2
Symbol_77	S1PR1	CDK1	CD38	CD53	EXTL2	CASP8	CNGB1	ATP5G2	E4F1	CNGB1	BMPR1B	APOE	GGT1	ATP1B2	NUP88	CDO1	CASP8	GIF	ABCD2	AP2S1	EDA	FCER1G	ATP7B	BMP6	CST2	HIST1H2BB	AP1S1	BBS2	CSF2	HCN2	EGR1	CASQ1	CHEK1	ATP6V1B1	CLU	KIT	CTNNB1	BMPR1B	CD34	CSF1R	ATP6V0B	CDH13	GAD1	PSMA2	BLM	CCND3	AVPR1A	AVPR1A	FOXL2
Symbol_78	CCNB1	CD36	CD28	CAV3	EXT2	C1QBP	CDA	ATP5G1	DVL3	CLPS	BMPR1A	APOC4	G6PD	ATP1B1	NUMA1	CCBL1	CASP7	FPGS	ABCD1	AP1S1	DRD2	FCER1A	ATP7A	BMP5	CST1	HIST1H2BD	BBS2	BBS1	CEBPB	BCKDHB	CTSH	CAPN3	CDKN1B	ATP5B	CASP8	ING2	CSF1	BCL2L1	CD14	CCR7	ATP6V1E1	CD74	FPGS	PSMA1	BCL6	CCND2	AVP	AVP	BMPR1B
Symbol_79	CAV3	CAT	CD27	CAV2	EXT1	BNIP3	CAT	ATP5F1	DVL2	AKR1C4	BMP7	APOC3	FKBP1A	ATP1A4	LMNA	CBS	CASP3	FOLR1	AKT2	AP2M1	DCT	CR1	ATP6V0A1	BMP2	COL11A1	H2AFZ	BBS1	RHOG	CEBPA	ASS1	CTNNB1	CAMK2D	CDC42	ATP4A	CAPN3	HSPA2	CREB1	BCL2	CASP1	CIDEA	ATP6V1C1	CALR	FOLR1	PLK1	BAX	CCNC	ANXA1	ANXA1	BCL2L1
Symbol_80	CAPZB	BNIP3	CASP3	CAPN3	DCN	BIK	ANXA2	ATP5E	DVL1	CALM3	BMP6	APOC2	ECE1	ATP1A3	HMGB2	CAD	CASP1	FASN	AKT1	CENPE	LYST	CLC	ATP6V1G2	ASMT	CALCA	H2AFX	ARRB1	ARF6	CDX4	AQP9	CD34	CALR	CCNF	ATP1A4	C6	HMGB2	CCR1	BAX	C5	CD34	ATP6V0C	C5	FH	PIN1	AXL	CCNB1	ALOX15B	ALOX15B	BCL2
Symbol_81	CAPZA2	BMP7	BTK	CAPN2	CTNNB1	BID	ALDOC	ATP5D	DUSP6	OPN1SW	BMP4	APOB	DPEP1	ATP1A2	GPER1	BCAT2	BOK	CYB5R3	AGXT	CD74	BCL2	CD40	ATP6V0B	AKR1B1	CACNB4	HIST1H1T	ARL3	AR	CDX2	AQP1	CALB1	CALM3	CCNB1	ATP12A	C3	FANCG	RUNX1	AXL	BMP6	CD14	ATP6V1B2	C3AR1	CYP17A1	GCLM	FASLG	CCNA2	ALOX15	ALOX15	BAX
Symbol_82	CAPZA1	AXL	PRDM1	CACNA1S	CSPG4	BCL2L1	ALDOA	ATP5C1	CTNNB1	APOE	BMP2	APOA4	DMD	ATP1A1	ETS1	AUH	BID	CYB5A	ACOX1	CANX	BBS4	CD28	ATP6V1E1	ALDH1A3	CACNA1F	HIST1H1B	ARF1	ANXA13	CASP8	AQP8	BMP7	CACNA1C	CAV3	FASLG	BAD	SLC26A3	CASP8	ARRB2	ALOX15B	CASP1	ATP6V1B1	C1QBP	CYP11A1	CDC27	FAS	CASP3	ALOX12B	ALOX12B	ARRB2
Symbol_83	CAPG	ATP7A	BCL6	BTG1	NCAN	BCL2	ADSL	ATP5B	SEPT7	APOC3	ASGR2	APOA2	ACE	SHROOM2	EMD	ALDH7A1	BAX	BTD	ACADVL	ARF1	BBS2	C3	ATP6V1C1	ALDH1A1	CA6	HIST1H1E	ANXA13	ANXA2	PRDM1	BIRC2	BMP4	BDKRB1	CAPZB	AGTR2	ASPH	DLD	CAMK4	ANXA1	AGTR2	C5	ATP6V1A	AZU1	CD34	CDC20	ANXA1	BLM	ALOX5AP	ALOX5AP	AMH
Symbol_84	BRCA1	RHOB	BCL2	BMP4	VCAN	BAX	ACTN2	ATP5A1	CDK1	APOC2	ALOX15	APOA1	CTSH	ANK3	TOR1A	ASPA	BAD	AOX1	ACADS	AP1G1	BAX	BTK	ATP6V0C	AFP	AZGP1	HIST1H1D	ANK3	ANK3	ASCL2	APEX1	BCL2	BAX	BRCA1	AGTR1	APOE	CFTR	CALCA	AMH	ADRB1	APOA2	ALAS2	AIF1	ATIC	CDK1	AKT1	CCND1	ALOX5	ALOX5	AGT
Symbol_85	ARHGAP6	ARG1	BAD	BCL9	COL11A1	BAD	ACHE	ATP4B	BMPR1A	APOB	AHSG	ADRB1	CTNS	ACTN4	DMPK	ASL	ASPH	ACPP	ACADM	AP2B1	ATP7A	BCL6	ATP6V1B2	ADM	ATP2B2	HIST1H1C	AP1G1	ANK2	ARNT	ALDH3A1	AQP2	ATP7B	DST	AGT	AKT1	BBS4	CA2	AGT	ADORA2A	APOA1	ACO1	AGER	ASPA	CCNB1	ADAM8	APC	ALOX12	ALOX12	AFP
Symbol_86	SHROOM2	AQP1	ATM	BCL2	COL2A1	AVP	ACADS	ATP4A	BMP7	APOA4	ADRB2	ACOX1	CMA1	ASIC1	CDK1	ARG1	FASLG	ACP5	ACADL	AP1B1	ASIP	B2M	ATP6V1B1	ADH7	ARRB2	H1F0	AP1B1	ANK1	AKT1	AGXT	AGTR2	ASPH	ARL2	ADORA2A	ADRA2A	BBS2	C1QC	AFP	ADAM8	ALOX15B	ABCB7	ADAM10	ADSS	BMI1	ADA	AKT1	ACOX1	ACOX1	ADCYAP1
[truncated: 1 more columns]
